# Supplementary material for: Evaluation of Jet Flooding in Distillation Column Olefins Plant on Naphtha to LPG Feed Substitution
Source: MDPI journal article supplement (doi:10.3390/chemengineering7040063), 2023-07-20
Supplement: s1 [file s1]

# INTEGRATED PLANT SIMULATION BY PROCESS SIMULATION SOFTWARE

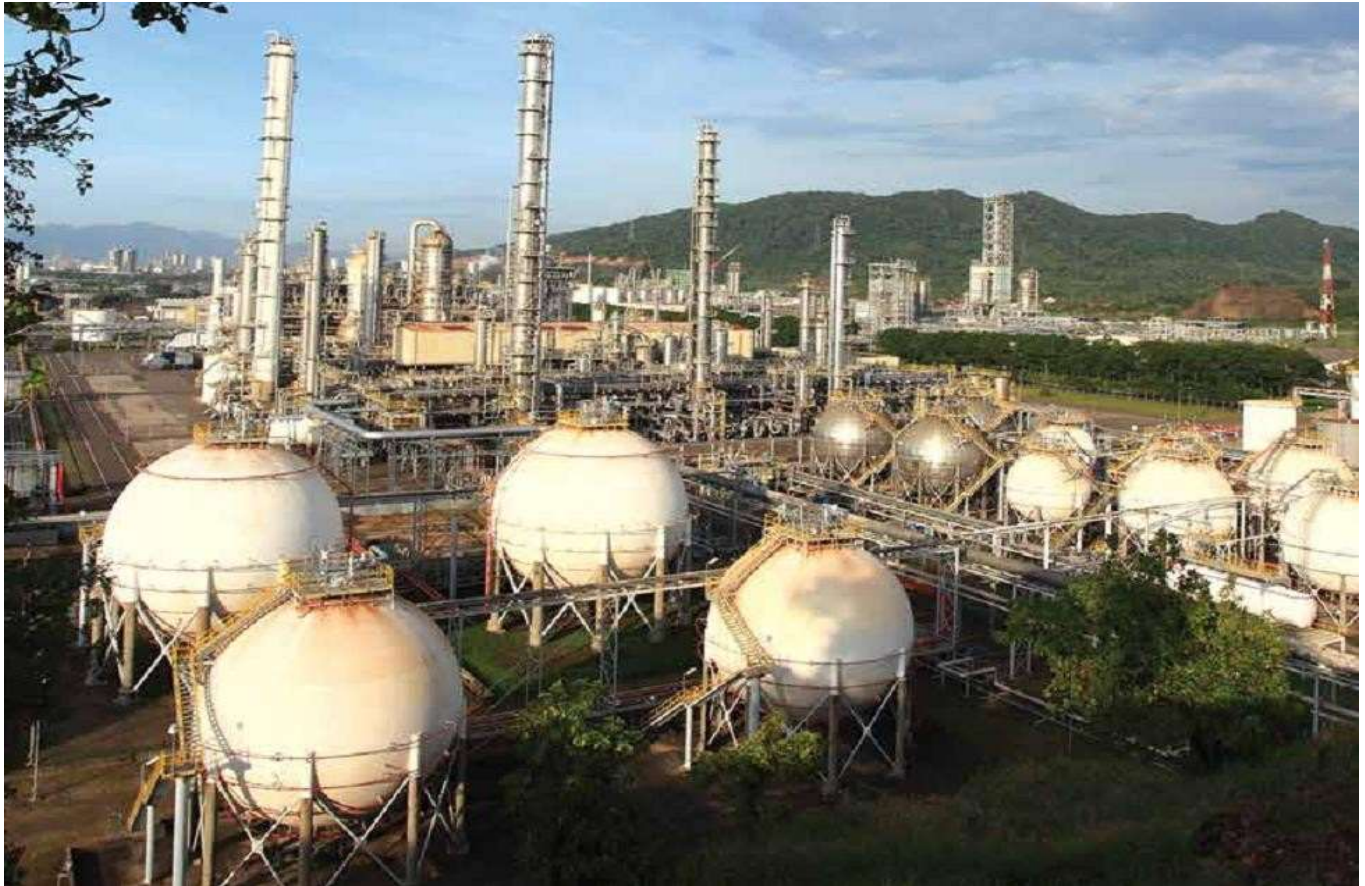

**Simulation Report of Working Stage 6**

**HYSYS INTEGRATION STAGE 1, 2, 3, 4, & 5**



## TABLE OF CONTENTS

|                                                    |     |
|----------------------------------------------------|-----|
| TABLE OF CONTENTS .....                            | i   |
| LIST OF FIGURES .....                              | iii |
| LIST OF TABLES .....                               | iv  |
| PT. LAPI ITB SIMULATION TEAM MEMBER.....           | v   |
| CHAPTER I .....                                    | 1   |
| CHAPTER II.....                                    | 4   |
| CHAPTER III .....                                  | 6   |
| CHAPTER IV.....                                    | 11  |
| IV.1    SIMULATION INTEGRATION STAGE 1 .....       | 11  |
| IV.1.1    Process Description.....                 | 11  |
| IV.1.2    Stream List .....                        | 14  |
| IV.1.3    Unit Operation .....                     | 16  |
| IV.1.4    Simulation Approach and Assumption ..... | 17  |
| IV.1.5    Simulation PFD.....                      | 19  |
| IV.1.6    Simulation Result and Evaluation.....    | 19  |
| IV.2    Simulation Integration Stage 2 .....       | 23  |
| IV.2.1    Process Description.....                 | 23  |
| IV.2.2    Stream List .....                        | 25  |
| IV.2.3    Unit Operation .....                     | 27  |
| IV.2.4    Simulation Approach and Assumption ..... | 28  |
| IV.2.5    Simulation PFD.....                      | 29  |
| IV.2.6    Simulation Result and Evaluation.....    | 29  |
| IV.3    Simulation Integration Stage 3 .....       | 30  |
| IV.3.1    Process Description.....                 | 30  |
| IV.3.2    Stream List .....                        | 33  |
| IV.3.3    Unit Operation .....                     | 35  |
| IV.3.4    Simulation Approach and Assumption.....  | 37  |
| IV.3.5    Simulation PFD.....                      | 39  |
| IV.3.6    Simulation Result and Evaluation.....    | 39  |
| IV.4    Simulation Integration Stage 4 .....       | 40  |
| IV.4.1    Process Description.....                 | 40  |
| IV.4.2    Stream List .....                        | 42  |
| IV.4.3    Unit Operation .....                     | 46  |
| IV.4.4    Simulation Approach and Assumption.....  | 47  |

---

**Simulation Report – ECC 860 KTA**  
**Working Stage 6**

---

|           |                                         |     |
|-----------|-----------------------------------------|-----|
| IV.4.5    | Simulation PFD.....                     | 48  |
| IV.4.6    | Simulation Result and Evaluation.....   | 48  |
| IV.5      | Simulation Integration Stage 5.....     | 52  |
| IV.5.1    | Process Description.....                | 52  |
| IV.5.2    | Stream List .....                       | 53  |
| IV.5.3    | Unit Operation .....                    | 54  |
| IV.5.4    | Simulation Approach and Assumption..... | 56  |
| IV.5.5    | Simulation PFD.....                     | 57  |
| IV.5.6    | Simulation Result and Evaluation.....   | 57  |
| IV.6      | Simulation Integration Stage 1-5.....   | 59  |
| IV.6.1    | Process Description.....                | 59  |
| IV.6.2    | Simulation Approach and Assumption..... | 59  |
| IV.6.3    | Simulation PFD.....                     | 60  |
| IV.6.4    | Simulation Result and Evaluation.....   | 60  |
| CHAPTER V | .....                                   | 70  |
| V.1       | Conclusion .....                        | 70  |
| V.2       | Recommendation .....                    | 71  |
| APPENDIX  | .....                                   | 72  |
| A.        | Component List.....                     | 72  |
| A.1.      | Stage 1 .....                           | 72  |
| A.2.      | Stage 2 .....                           | 142 |
| A.5.      | Stage 3 .....                           | 211 |
| A.4.      | Stage 4 .....                           | 239 |
| A.5.      | Stage 5 .....                           | 299 |
| B.        | PFD Simulation .....                    | 342 |
| B.1.      | Integration Stage 1 to Stage 5.....     | 342 |

## LIST OF FIGURES

|                                                                                                                        |    |
|------------------------------------------------------------------------------------------------------------------------|----|
| Figure III. 1. Component of Stage 2 in Simulation .....                                                                | 8  |
| Figure IV. 1 Block Flow Diagram of CAP Ethylene Plant .....                                                            | 11 |
| Figure IV. 2. Simulation PFD of Gasoline Fractionator and PFO Stripper .....                                           | 19 |
| Figure IV. 3. Profil Temperature of Column DA-101(A & B), DA-103(C), DA-102(D), .....                                  | 22 |
| Figure IV. 4. PFD of Stage 2 Integration in HYSYS.....                                                                 | 29 |
| Figure IV. 5. Temperature Profile of DA-201 .....                                                                      | 30 |
| Figure IV. 6 Simulation PFD of Stage 3 Integration.....                                                                | 39 |
| Figure IV. 7. Simulation PFD of Depropanizer.....                                                                      | 41 |
| Figure IV. 8. Simulation PFD of Propylene Fractionation No. 3.....                                                     | 41 |
| Figure IV. 9. PFD of Debutanizer.....                                                                                  | 42 |
| Figure IV. 10. Simulation PFD of Stage 4.....                                                                          | 48 |
| Figure IV. 11. Profil Temperature of DA-403M (A), DA-404M (B), DA-415M (C), DA-407M (D),<br>DA-405 and DA-406 (E)..... | 51 |
| Figure IV. 12. Simulation PFD of Stage 5.....                                                                          | 57 |
| Figure IV. 13. Profil Temperature of DA-1202M (A) and DA-1203M (B) .....                                               | 58 |
| Figure IV. 14. Simulation PFD of Stage 1-5 Integration .....                                                           | 60 |
| Figure IV. 15. Profil Temperature of Column DA-101(A), DA-103(B), DA-102(C), .....                                     | 63 |
| Figure IV. 16. Temperature Profile of DA-201 .....                                                                     | 63 |
| Figure IV. 17. Profil Temperature of DA-403M (A), DA-404M (B), DA-405 and DA-406 (C),<br>DA-415M (D), DA-407 (E).....  | 66 |
| Figure IV. 18. Profil Temperature of DA-1202M (A) and DA-1203M (B) .....                                               | 67 |

## **LIST OF TABLES**

|                                                                        |           |
|------------------------------------------------------------------------|-----------|
| <b>Table II. 1 Description Module Unit Operations in HYSYS.....</b>    | <b>5</b>  |
| <b>Table III. 1. Simulation Components of Stage 1 .....</b>            | <b>6</b>  |
| <b>Table III. 2. Simulation Component of Stage 2 and Stage 3 .....</b> | <b>8</b>  |
| <b>Table III. 3. Simulation Component of Stage 4.....</b>              | <b>9</b>  |
| <b>Table III. 4. Simulation Components of Stage 5 .....</b>            | <b>9</b>  |
| <b>Table IV. 1. Process Stream List of Stage 1 .....</b>               | <b>14</b> |
| <b>Table IV. 2 Process Equipment of Stage 1 .....</b>                  | <b>16</b> |
| <b>Table IV. 3. Simulation Component of Stage 1 .....</b>              | <b>17</b> |
| <b>Table IV. 4. Stream List of Stage 2.....</b>                        | <b>25</b> |
| <b>Table IV. 5. Process Equipment that used in Stage 2 .....</b>       | <b>27</b> |
| <b>Table IV. 6. Process Streams of Stage 3.....</b>                    | <b>33</b> |
| <b>Table IV. 7. Process Equipment Used in Stage 3.....</b>             | <b>35</b> |
| <b>Table IV. 8. Stage 4 Stream List .....</b>                          | <b>42</b> |
| <b>Table IV. 9. Unit Operation in Stage 4.....</b>                     | <b>46</b> |
| <b>Table IV. 10. The Stream List of Stage 5.....</b>                   | <b>53</b> |
| <b>Table IV. 11. Unit Operation in Stage 5.....</b>                    | <b>54</b> |

## **CHAPTER I**

### **INTRODUCTION**

One of most efficient and accurate method for evaluating chemical process system is the simulation process. Simulation apply knowledge of chemical engineering processes such as mass balance, energy balance, thermodynamics, and chemical reaction engineering using computer assistance. There are many types of simulators on the market, namely Aspen Plus, Aspen HYSYS, CHEMCAD, PRO/II, PROMAX, etc. In this project, Aspen HYSYS will be used to simulate the process. By using this simulator process, existing systems can be modeled and evaluated easily and cheaply. In addition, the new system can be designed with easy to obtain a solution to improve the performance of a chemical plant.

Another capability of the simulation process is the evaluation of the dimensions of equipment or unit operation and evaluation of the economics of the plant can be done quickly. In addition, the optimization process is more easily done with the help of simulation models.

Olefin Plant in PT. Chandra Asri Petrochemical Tbk. (CAP) is a chemical plant that processes naphtha into the polymer raw materials such as ethylene, propylene, butadiene, and BTX. Olefin Plant began its operation in 1995 so it's been about 19 years old. The main problem of an old petrochemical plant is a decrease in the ability of the plant operation. In this project, the performance of olefins plant will be evaluated based on plant design data by making a model of the olefin plant in HYSYS process simulator. With this model the problems that occur in the plant can be better evaluated. Operating conditions can also be optimized based on the production target set.

Details of these units are as follows:

#### **Working Stage 1**

1. Gasoline Fractionator and PFO Stripper
2. Quench Tower
3. Water Stripper and Dilution Steam Generation
4. Charge Gas Compressor Stages 1, 2, & 3

#### **Working Stage 2**

1. Acid Gas Removal, Charge Gas Drying, and Dryer Regeneration Facilities
2. Spent Caustic Pretreatment
3. Charge Gas Compressor Stages 4 & 5 and Condensate Stripper
4. Cracked Gas Chilling

**Working Stage 3**

1. Demethanizer
2. Methane Refrigerant Compressor
3. Methanation and Hydrogen Purification
4. Deethanizer and Acetylene Hydrogenation
5. Ethylene Fractionation

**Working Stage 4**

1. Depropanizer
2. C3 Hydrogenation
3. Propylene Fractionation
4. Debutanizer
5. Propylene Refrigeration System

**Working Stage 5**

1. Ethylene Refrigeration System
2. C4/C5 Hydrogenation
3. Py-gas Hydrogenation
4. Depentanizer
5. BTX Tower

**Working Stage 6**

1. Simulation Stage 1
2. Simulation Stage 2
3. Simulation Stage 3
4. Simulation Stage 4
5. Simulation Stage 5

This report is the description of process simulation results of integration stage 1, integration stage 2, integration stage 3, integration stage 4, integration stage 5 and integration from stage 1 to stage 5. The integration of each stage are the combination of every unit on that stage. Moreover, the error that appears from the integration process compared to the unit simulation are calculated in the excel data and the data are attached in the appendix. The error/deviation that will be calculated including error of stream properties (mass flow) and column temperature. Furthermore, the integration data of stage 1 to stage 5 integration are compared to the unit simulation data in the stage 6 discussion including the stream properties and column temperature.

Some important parameters for simulation results evaluation are as follows:



1. Error in the process condition (temperature and pressure) and component mass is not more than 0.1% especially for key component
2. Error in %-composition of the main product including ethylene, propylene, C4 crude and pyrolysis gas is not more than 0.1%
3. Hypothetical components are represented by at least 3 components to improve the temperature profile

## CHAPTER II HYSYS INTRODUCTION

Knowing and understanding the behavior processing system is desperately needed by a process engineer. By doing so, a process engineer can maintain and even improve the performance of the operating system to obtain the highest possible profit. The behavior of the operating system can be studied through several methods, namely through experiments and mathematical models approach. Today, mathematical models have been used extensively to study the influence and relevance of variables in a system because it is relatively faster, cheaper, and minimal risk compared with the experimental method. Therefore, various kinds of software have been made as a tool to facilitate iteration count mathematical model of a system, and is currently a lot of attention.

HYSYS is one device that has been widely used to model a process with exceptional ability in understanding at the perspective of the process and present the data and comprehensive calculations. HYSYS was designed by HYPROTECH for process modelling of wide range of chemical industry, especially industries engaged in oil refining and petrochemicals. HYSYS then taken over and modified further by Aspen Tech and Honeywell (also known as UNISIM Design). Compared with other simulators, HYSYS has several advantages, including:

1. HYSYS has interactive command interpretation facilities. Whatever information is entered, it will be processed immediately (without waiting for orders from the user).
2. HYSYS has the ability to flow of information back and forth (bi-directional) that can make the simulation results into a comprehensive and contains few errors numerical iteration.
3. HYSYS equipped with features that can simplify the optimization process and study the influence and interaction between variables in a process system.

These reasons make the widespread use of HYSYS simulator for a variety of purposes, both in industry and universities.

Some modules of operating units, which available in HYSYS are shown in Table II.1.

**Table II. 1 Description Module Unit Operations in HYSYS**

| Unit Operation                                                                      | Description                                                                                                                                                                       |
|-------------------------------------------------------------------------------------|-----------------------------------------------------------------------------------------------------------------------------------------------------------------------------------|
|    | Material flow. Contains a wide range of compounds with the composition and certain conditions.                                                                                    |
|    | Energy flow. Contains a number of energy involved in the process.                                                                                                                 |
|    | Two phase separator. Used to model the separator tank to separate the gas and liquid flow.                                                                                        |
|    | Three phase separator. Used to model the three-phase separator. For example, separating a mixture of water, oil, and gas.                                                         |
|    | Heat Exchanger. Modeling the heat exchanger between the two flow (flow of heat and cold flow) in the industry.                                                                    |
|    | Cooler and Heater. Modeling of heat exchangers, but this unit module only calculate the calorific needs heating or cooling a flow regardless of flow conditions heater or cooler. |
|    | Pump models. Used to increase the pressure of the liquid flow.                                                                                                                    |
|   | Model compressors. Used to increase the pressure of the gas flow.                                                                                                                 |
|  | Mixer. Used to combine two or more material flow.                                                                                                                                 |
|  | Tee. Used for separating the flow of material into two or more streams.                                                                                                           |
|  | Distillation column. Used to model the distillation column, complete with condenser and reboiler.                                                                                 |
|  | Absorber column. In principle, nearly equal to the distillation column, however, in this column is not used condenser and reboiler.                                               |
|  | Shortcut distillation. This module is used to determine the characteristics of the distillation of a mixture of compounds based on FUG method.                                    |
|  | Control module "Adjust", is used to transform a massive operation to define the magnitude of the relationship with other relevant quantities.                                     |
|  | Control module "Set", is used to lock the value of a quantity.                                                                                                                    |
|  | Control module "Recycle", is used as the interface when they wanted to recycle a material flow.                                                                                   |

## CHAPTER III

### SIMULATION BASIS

The first thing that must be done before making HYSYS simulation is to determine the components that are involved in the process and determining the thermodynamic fluid package. Simulation of Stage I is based on the Basic Engineering Design Case 2, in accordance with the information stated on the entire PFD each unit in Stage I. The C<sub>6</sub>-C<sub>8</sub>, C<sub>9</sub>, PGO, and PFO compound is broken down into several components. Components involved in the process in the first stage are presented in Table III.1.

**Table III. 1. Simulation Components of Stage 1**

| Design Name                          | Simulation Name   |
|--------------------------------------|-------------------|
| Hydrogen                             | Hydrogen          |
| Carbon Monoxide                      | CO                |
| Carbon Dioxide                       | CO <sub>2</sub>   |
| Hydrogen Sulphide                    | H <sub>2</sub> S  |
| Methane                              | Methane           |
| Acetylene                            | Acetylene         |
| Ethylene                             | Ethylene          |
| Ethane                               | Ethane            |
| Propadiene/Propyne                   | Propadiene        |
| Propylene                            | Propene           |
| Propane                              | Propane           |
| Butadienes/C <sub>4</sub> Acetylenes | 1,3-Butadiene     |
| Butylenes                            | 1-Butene          |
| Butanes                              | n-Butane          |
| C <sub>5</sub> Hydrocarbons          | i-Pentane         |
| C <sub>6</sub> Non-Aromatics         | 1-Hexyne          |
| C <sub>7</sub> Non-Aromatics         | n-Heptane         |
| C <sub>8</sub> Non-Aromatics         | n-Octane          |
| Benzene                              | Benzene           |
| Toluene                              | Toluene           |
| Xylenes/Ethylbenzene                 | p-Xylene          |
|                                      | E-Benzene         |
| Styrene                              | Styrene           |
| C <sub>9</sub> – 204°C               | o-Mstyrene        |
|                                      | 1,2,3-Mbenzene    |
|                                      | 1-Undecene        |
| 204 – 288°C (PGO)                    | 1-Undecyne        |
|                                      | Hex-M-Benz        |
|                                      | n-C <sub>13</sub> |
|                                      | n-C <sub>14</sub> |
|                                      | n-C <sub>15</sub> |

**Simulation Report – ECC 860 KTA**  
**Working Stage 6**

---

| Design Name      | Simulation Name   |
|------------------|-------------------|
| 288°C Plus (PFO) | n-C <sub>17</sub> |
|                  | n-C <sub>20</sub> |
|                  | n-C <sub>23</sub> |
|                  | n-C <sub>26</sub> |
|                  | n-C <sub>28</sub> |
|                  | n-C <sub>30</sub> |
| Steam/Water      | H <sub>2</sub> O  |

Not all components available in Basic Engineering Design included in the HYSYS database. Therefore, some of the components used in simulation are hypothetical component, i.e. component that formed based on assumptions or certain physical properties approaches of such components. In addition, some of the components in the simulation is a representation of the components in the form of a group of compounds. Fluid package that used in Stage 1 simulation is Peng-Robinson.

Hypotetical componet or groups of representative compounds in simulation as follow:

1. Butadienes/C<sub>4</sub> Acetylenes in simulation represented by 1,3-Butadiene
2. Butylenes in simulation represented by 1-Butene
3. Butanes in simulation represented by n-Butane
4. C<sub>5</sub> Hydrocarbons in simulation represented by i-Pentane
5. C<sub>6</sub>, C<sub>7</sub>, and C<sub>8</sub> Non-Aromatics in simulation represented by 1-Hexyne, n-Heptane, n-Octane, respectively
6. Xylenes/Ethylbenzene in simulation represented by p-Xylene and E-benzene
7. C<sub>9</sub> – 204°C in simulation represented by o-MStyrene, 1,2,3-MBenzene, 1-Undecene
8. 204 – 288°C (PGO) in simulation represented by 1-Undecyne, Hex-M-Benz, n-C<sub>13</sub>, n-C<sub>14</sub>, and n-C<sub>15</sub>
9. 288°C+ (PFO) in simulation represented by n-C<sub>17</sub>, n-C<sub>20</sub>, n-C<sub>23</sub>, n-C<sub>26</sub>, n-C<sub>28</sub>, n-C<sub>30</sub>

For stage 2 and 3, the components used in the simulation follows the list of components in the Engineering Package. Problem that appear are several components in the engineering package mentioned in the form of a range of components that need to be searched vice corresponding components in Hysys. The approach used to approximate the components in the range is considering of the molecular weight of the total flow. The closer the molecular weight of the flow with the design, simulation of the expected components should have been getting closer to reality. The following components are used in working stage 2 and working stage 3 are shown on the Figure III.1 and Table III.2.

# Simulation Report – ECC 860 KTA

## Working Stage 6

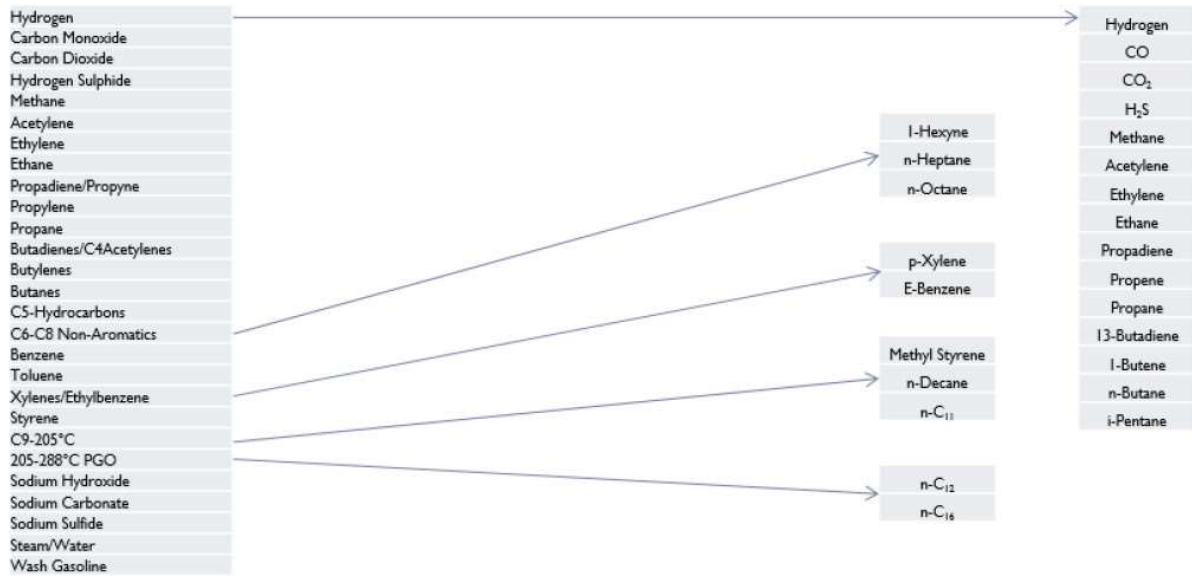

**Figure III. 1. Component of Stage 2 in Simulation**

**Table III. 2. Simulation Component of Stage 2 and Stage 3**

| Simulation Component | Design Component        |
|----------------------|-------------------------|
| Hydrogen             | Hydrogen                |
| CO                   | Carbon Monoxide         |
| Methane              | Methane                 |
| Acetylene            | Acetylene               |
| Ethylene             | Ethylene                |
| Ethane               | Ethane                  |
| Propadiene           | Propadiene/Propyne      |
| Propene              | Propylene               |
| Propane              | Propane                 |
| 13-Butadiene         | Butadienes/C4Acetylenes |
| 1-Butene             | Butylenes               |
| n-Butane             | Butanes                 |
| i-Pentane            | C5-Hydrocarbons         |
| 1-Hexyne             | C6-C8 Non-Aromatics     |
| n-Heptane            |                         |
| n-Octane             |                         |
| Benzene              | Benzene                 |
| Toluene              | Toluene                 |
| H <sub>2</sub> O     | Steam/Water             |
| Nitrogen             | Nitrogen                |

The components that used in the stage 4 are listed in the Table III.3. The fluid package used in the stage 4 simulations are Peng-Robinson, SRK-Twu, Wilson-Ideal, and UNIQUAC.

**Table III. 3. Simulation Component of Stage 4**

| <b>Design Component</b> | <b>Simulation Component</b> |
|-------------------------|-----------------------------|
| Hydrogen                | Hydrogen                    |
| Methane                 | Methane                     |
| Ethane                  | Ethane                      |
| Acetylene               | Acetylene                   |
| Ethylene                | Ethylene                    |
| Propadiene              | Propadiene                  |
| Propylene               | Propylene                   |
| Propane                 | Propane                     |
| Butadiene               | 1,3-Butadiene               |
| Butylene                | 1-Butene                    |
| Butane                  | n-Butane                    |
| C5-hydrocarbon          | 1-Pentyne                   |
|                         | 1,4-Pentadiene              |
| C6 non-aromatics        | Cis3-hexene                 |
| C7 non-aromatics        | n-Heptane                   |
| C8 non-aromatics        | n-Octane                    |
| Benzene                 | Benzene                     |
| Toluene                 | Toluene                     |
| Xylene                  | p-Xylene                    |
|                         | E-Benzene                   |
| Styrene                 | Styrene                     |
| C9-205 Deg C            | n-Norbornene                |
|                         | n-Decane                    |
| 205-288 Deg C PGO       | n-C11                       |
|                         | n-C12                       |
|                         | n-C13                       |
|                         | n-C14                       |

The component that used in the stage 5 simulation are listed on the table III.3. The fluid package used in this stage is Peng-Robinson.

**Table III. 4. Simulation Components of Stage 5**

| <b>Design Component</b> | <b>Simulation Component</b> |
|-------------------------|-----------------------------|
| Hydrogen                | Hydrogen                    |
| Methane                 | Methane                     |
| Ethane                  | Ethane                      |
| Propadiene              | Propadiene                  |

**Simulation Report – ECC 860 KTA**  
**Working Stage 6**

---

|                     |               |
|---------------------|---------------|
| Propylene           | Propylene     |
| Propane             | Propane       |
| Butadiene           | 1,3-Butadiene |
| Butylene            | 1-Butene      |
| Butane              | n-Butane      |
| C5-hydrocarbon      | n-Pentane     |
|                     | i-Pentane     |
|                     | Cyclopentane  |
| C6-C8 non aromatics | 1-Hexyne      |
|                     | n-Heptane     |
|                     | n-Octane      |
| Benzene             | Benzene       |
| Toluene             | Toluene       |
| Xylene              | p-Xylene      |
|                     | E-Benzene     |
| Styrene             | Styrene       |
| C9-205 Deg C        | n-Nonane      |
|                     | n-Decane      |
|                     | n-C11         |
| 205-288 Deg C PGO   | n-C12         |
|                     | n-C13         |
|                     | n-C14         |



## CHAPTER IV PROCESS SIMULATION

### IV.1 SIMULATION INTEGRATION STAGE 1

#### IV.1.1 Process Description

The Block Flow Diagram of CAP Ethylene Plant of 860 KTA is presented in Figure IV.1.

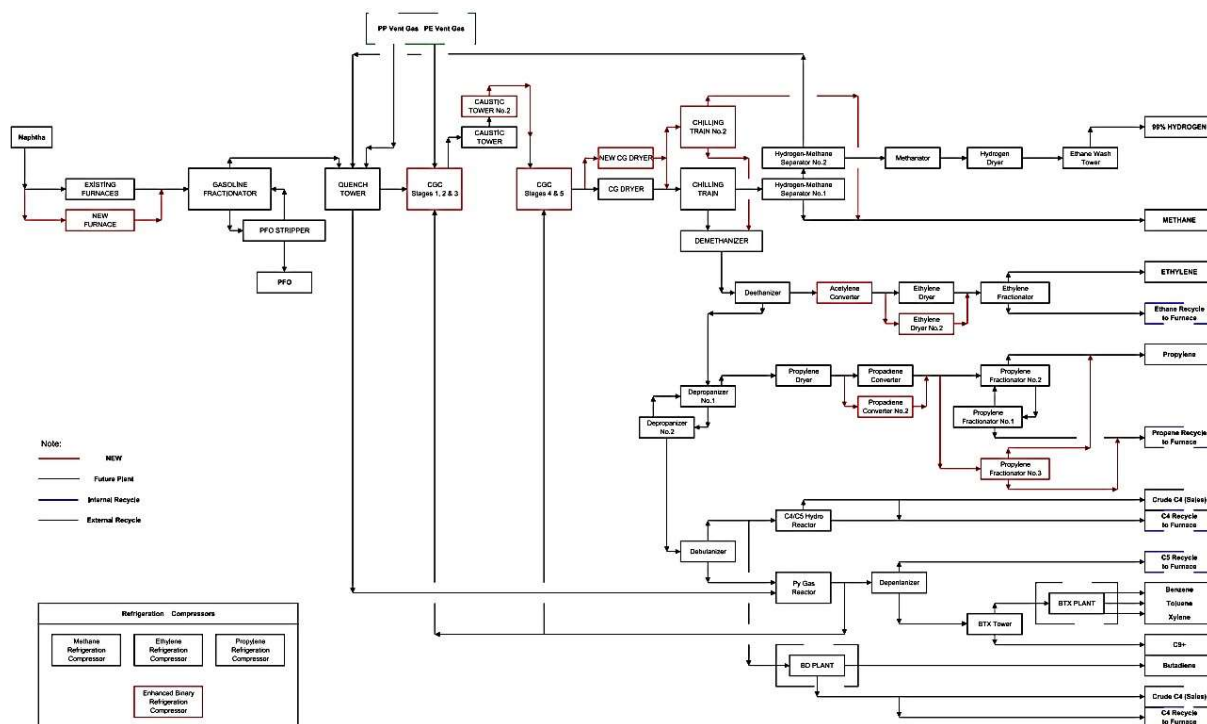

**Figure IV. 1 Block Flow Diagram of CAP Ethylene Plant**

The process main point that is needed to accomplish is the separation of heavy fraction (PGO and PFO) from solution of light fraction, which consider achieving heat recovery from cracking stream in Cracked Heater Unit. The light fraction that separated will be processed further in next units to produce ethane, propane, etc. On the other hand, the heavy fraction will be used as BFW heater before sold as fuel. The main units in this section are Gasoline Fractionator, PFO Stripper, and Quench Tower.

All input streams in this section are derived from eight (8) output streams unit Cracked Heater, seven of them have similar composition and physical properties and all of them goes into Gasoline fractionator column from two head stream. First head stream comes from BA-102 to BA-105, while the second comes from the head stream of BA-106 until BA-108. On the other hand, the other two head flow is the flow of recycle component of  $C_2$  or  $C_3$  that enter Gasoline Fractionator or PFO Stripper. All four head streams also have high

temperature (about 200°C) that contains the energy that would be recovered for steam generation from the BFW.

The first three of head feed stream entered the bottom part of the Gasoline Fractionator. The stream enters the column as a mixture of gas and liquid phase. Most of the heavy fractions are in a liquid phase, while the lighter fractions tend to be in the gas phase. Shortly after the feed stream enters the column, the separation of lightweight components and heavy components occurred. Lightweight components consisting of C<sub>1</sub>-C<sub>9</sub> and most PGO evaporated to the top of the column through trays. At the upper limit of the bottom section, a side stream is used to take most of the PGO components. Meanwhile, lightweight components flow through the upper section trays and then exit as overhead product of Gasoline Fractionator heading to Quench Tower. A small amount of gasoline that is carried away by the flow of the column overhead to the quench tower is recycled back to the top of Gasoline Fractionator.

Meanwhile, the PGO that is taken as a side stream from Gasoline Fractionator flowed into the seventh tray of PFO Stripper column. In addition, heavy components, which come out as a bottom product of Gasoline Fractionator (known as a quench oil), flowed into the PFO Stripper after having done heat recovery and divided into several streams to recycle. The temperature inside the column is set by using this recycle stream. The recover heat is used to produce low-pressure steam that is used for processes in separate units. Quench oil gets into the top of PFO Stripper.

PFO Stripper serves to separate almost all the light components that are still carried in the stream of the heavy fraction (PGO and quench oil) by contacting the feed stream with low-pressure and high temperatures steam. Steam will vaporize the lighter components to be recycled back into Gasoline Fractionator. While the heavy components out as a bottom product from the column PFO Stripper (known as PFO) to be stored or sold as fuel.

Vapor stream which flows out from Gasoline Fractionator (DA-101) is cooled further and condensed partially. The process occurs through direct contact countercurrent using recirculated water in the Quench Tower (DA-102). Recirculation water that hot enough (S-2201) flows out from the DA-102. It can be used to supply heat for the process.

Feed (S-2101) from DA-101 enters the bottom of DA-102 which has four beds that separated into two parts. Four bed has a number of stages equivalent to 10 to 11 stages. The flow of liquids and gases had entered the place respectively. Cooling water (S-2235) flows into the top. Meanwhile, cooling water with higher temperature (S-2234) enters between first and second bed or around the third and fourth stage, equivalently. While the flow of other units such as S-3025, S-3041, and S-3907 enters under the fourth bed.

Hot water stream from the DA-102 is used as a heat source in the economizer. This heat can be utilized for stream heating in the feed preheater, gas heater charge, deethanizer reboiler, depropanizer side reboilers, propylene fractionation reboilers, condensate preheater (deaerator feed), MAPD converter effluent heater, heavy tail cooling, and PFO cooling. Quench water then cooled further using sea water.

Output vapour at the top of quench tower (S-2117) flows into the unit Charge Gas Compressor. Meanwhile, gasoline that condensed out at the bottom (S-2118) was pumped and separated. The liquid portion (S-2120) returns to the DA-101 as reflux. Wash gasoline that used in the spent caustic is also taken from the bottom of quench tower. The rest is then mixed with medium gasoline from gas charge compression section before being drained into Pyrolysis Gasoline Hydrogenation (DPG unit). A small proportion of medium gasoline from charge gas compression can be recycled to the bottom of quench tower as a backup for fractionator reflux.

Process Water Stripper is used to eliminate acid gasses and volatile hydrocarbons that dilute in condensation dilution steam. Separation occurred at low-pressure condition.

Upper product of Process Water Stripper is returned to the Quench Tower, whereas the bottom product is inserted into the Dilution Steam Drum and is used to reheat Process Water Stripper.

The dilution steam can be formed by using the heat from the circulating quench oil and MP steam, which passes through some heat exchangers. Hydrocarbons output of Dilution Steam Generator is then recycled to the CGC.

Charge Gas Compression (CGC) Stage 1, 2, and 3 consist of three of five stages centrifugal compressor which compresses overhead vapor of Quench Tower (DA-102) to make Chilling Train separation process becomes easier. The CGC raises pressure from  $0.3 \text{ kg/cm}^2\text{g}$  into  $8.63 \text{ kg/cm}^2\text{g}$ . With increasing pressure, the dew point difference will be increased so that the gas charge is easily condensable. In addition, the energy required for the separation process can be reduced. Compressor is driven by a steam turbine. At every stage, there is a suction drum compression, compressor, and inter-stage cooler. Compression is done by inter-stage cooling to low the compressor discharge temperature due to increasing pressure, before flowing to the next compressor suction. This is necessary due to the lower temperature; the compressor power needed to achieve a certain compression ratio will be even lower. Suction drum is useful to ensure the absence of fog that can be entered into the compressor. Between the third and fourth stage, gas was treated with caustic wash to remove the acid content in the gas.

Once out of the Quench Tower, crack gas will go first into the suction drum. Each suction drum has a demister, which serves to capture the fog that formed in the suction drum so such liquid are not carried over to the compressor. Suction drum serves to separate the liquid phase and vapor to ensure only vapor phase are flowing into the compressor. The fluid in the flow that enters the compressor will cause damage to the compressor impeller. The liquid phase of the suction drum will be sent back to the Quench Tower. Top products of the first suction drum (FA-201) will enter the first stage compressor, while the bottom product is pumped back into the Quench Tower. Charge gas is cooled in the first inter-stage cooler (EA-201) from  $81.6^\circ\text{C}$  into  $41^\circ\text{C}$ . Gas output of the first stage compression that has a pressure of  $1.48 \text{ kg/cm}^2\text{g}$  is sent into the second suction drum (FA-202). After that, the gas charge is compressed to a pressure of  $4 \text{ kg/cm}^2\text{g}$ . Second gas compressor output is further cooled with

**Simulation Report – ECC 860 KTA**  
**Working Stage 6**

---

second inter-stage cooler (EA-202) from temperature of 83.4°C into 41°C. In second the suction drum, three-phase separation occurs: gas, water, and hydrocarbons (gasoline) are condensed. The medium gasoline and diesel then flowed into medium flash drum (FA-203). The upper product is then recycled to the Quench Tower, while the bottom product (in the form of medium heavy gasoline) is blended with gasoline from Quench Tower and Debutanizer bottom products, to further fed to DPG unit.

Charge gas from the second and third compressor stage are flowed into the compressor. CGC output third stage has a pressure of 8.78 kg/cm<sup>2</sup>g and temperature of 41°C. After that, the charge gases are supplied to the discharge drum of CGC third stage (FA-205) and then heated in a gas heater charge (EA-213) with a water quench. After that, it was flowed into Caustic Wash Water Tower.

#### **IV.1.2 Stream List**

Codes list and stream names involved in the proces of Stage 1 summarized in Table IV.1.

**Table IV. 1. Process Stream List of Stage 1**

| <b>Name</b> | <b>Description</b>                       | <b>Name</b> | <b>Description</b>        |
|-------------|------------------------------------------|-------------|---------------------------|
| 2101        | Gasoline Fractionation Overhead          | 2219        | QW from EA-801            |
| 2117        | Quench Tower Overhead                    | 2220        | QW to 2 Level Bypass      |
| 2118        | Quench Tower Gasoline Bottom             | 2221        | Quench Water to EA-424    |
| 2119        | Heavy Gasoline                           | 2222        | QW from EA-424            |
| 2120        | Gasoline Reflux to Gasoline Fractionator | 2223        | QW from EA-425            |
| 2121        | Wash Gas to EA-214                       | 2224        | QW from Level 2           |
| 2122        | Process Water from DA-102 Bottoms        | 2225        | QW to EA-115              |
| 2123        | Process Water Stripper Feed              | 2226        | QW from EA-115            |
| 2201        | QW from DA-102                           | 2231        | EA-116 QW Bypass          |
| 2202        | Quench Water to EA-213R                  | 2232        | QW from EA-116            |
| 2203        | Quench Water from EA-213R                | 2233        | QW to Warm Return         |
| 2204        | Quench Water to EA-401                   | 2234        | QW to Quench Tower (Warm) |
| 2205        | Quench Water from EA-401                 | 2235        | QW to Quench Tower (Cool) |
| 2206        | Quench Water to EA-416R                  | 2236        | QW to EA-703              |
| 2207        | Quench Water from EA-416R                | 2237        | QW from EA-703            |
| 2208        | Quench Water to EA-419                   | 2238        | QW to EA-422R             |
| 2209        | Quench Water from EA-419                 | 2239        | QW from EA-422R           |
| 2210        | QW to 1 Level Bypass                     | 2241        | QW to EA-124              |
| 2211        | QW from Level 1                          | 2242        | QW from EA-124            |
| 2212        | QW to EA-110                             | 2247        | QW to EA-441              |
| 2213        | QW from EA-110                           | 2248        | QW from EA-441            |
| 2214        | QW to EA-112R                            | 2249        | QW to EA-451              |

**Simulation Report – ECC 860 KTA**  
**Working Stage 6**

---

|      |                                          |      |                                            |
|------|------------------------------------------|------|--------------------------------------------|
| 2215 | QW from EA-112R                          | 2250 | QW from EA-451                             |
| 2216 | QW to EA-111                             | 2253 | QW from EA-455                             |
| 2217 | QW from EA-111                           | 2501 | Process Water Stripper Overhead            |
| 2218 | QW to EA-801                             | 3025 | Liquid from FA-201                         |
| 2227 | QW to 3 Level Bypass                     | 3038 | Vapor from FA-203                          |
| 2228 | QW to EA-804                             | 3041 | Medium Gasoline to QT                      |
| 2229 | QW from EA-804                           | 3907 | Spent Gasoline from FA-902                 |
| 2230 | QW from Users                            | 2501 | PW Stripper Overhead                       |
| 2101 | Gasoline Fractionator Overhead           | 2502 | Water to EA-121                            |
| 2044 | BA-109 Effluent to Gas Fractionator      | 2503 | Return from EA-121                         |
| 2016 | BA-106-7 Effluent to Gas Fractionator    | 2504 | PW Stripper Bottom                         |
| 2015 | BA-102-5 Effluent to Gas Fractionator    | 2505 | Wash Water to EE-902                       |
| 2031 | BA-108 Effluent to Gas Fractionator      | 2506 | Process Water to EA-114                    |
| 2021 | EA-113 Effluent with Purge Steam         | 2507 | Dil. Steam Drum Feed                       |
| 2120 | Gasoline Reflux to Gas Fractionator      | 2508 | Dil. Steam Drum Blow-down                  |
| 2030 | Liquid HTR to PFO Stripper               | 2509 | Water to Waste Treatment                   |
| 2108 | Cooled Fuel Oil Product                  | 2510 | Water to EA-118                            |
| 2110 | Quench Oil to EA-118                     | 2511 | Return from EA-118                         |
| 2111 | Quench Oil from EA-118                   | 2512 | Water to EA-119                            |
| 2115 | Quench Oil from EA-114                   | 2513 | Return From EA-119                         |
| 2102 | Total Gas Fractionator Bottom to GA-101  | 2514 | Dil. Steam Drum Overhead                   |
| 2109 | Gas Fraction Side Draw to PFO Stripper   | 2515 | Dil. Steam to Users                        |
| 2104 | QO to PFO Stripper                       | 2521 | Stripping Steam to DA-104                  |
| 2107 | PFO Prod from GA-107                     | 4138 | LP CH <sub>4</sub> to FA-201               |
| 2112 | PFO Recycle to Gas Fractionator          | 2117 | Quench Tower Overhead                      |
| 2106 | PFO Stripper to GA-107                   | 1230 | Off Gas to FA-201                          |
| 2125 | PFO Stripper Feed from Viscous QF        | 3025 | Liquid from FA-201                         |
| 2116 | LP Steam to PFO Stripper                 | 3001 | CGC 1 <sup>st</sup> Stage Suction          |
| 2105 | PFO Stripper Overhead                    | 3002 | CGC 1 <sup>st</sup> Stage Discharge        |
| 3049 | Total Medium Gasoline                    | 3003 | EA-201 Outlet                              |
| 3040 | Medium Gasoline to B.L.                  | 3026 | CGC 2 <sup>nd</sup> Suction Drum Water     |
| 3041 | Medium Gasoline to Q.T.                  | 3004 | CGC 2 <sup>nd</sup> Stage Suction          |
| 3038 | Vapor from FA-203                        | 3005 | CGC 2 <sup>nd</sup> Stage Discharge        |
| 3007 | CGC 3 <sup>rd</sup> Stage Suction        | 3006 | EA-202 Outlet                              |
| 3008 | CGC 3 <sup>rd</sup> Stage Discharge      | 3027 | Liquid from FA-204                         |
| 3009 | EA-203 Outlet                            | 3042 | Recycle Liquid to FA-202                   |
| 3010 | CGC 3 <sup>rd</sup> Discharge Drum Vapor | 3036 | CGC 2 <sup>nd</sup> Suction Drum HC Liquid |
| 3011 | CHG Gas Heater Effluent                  | 3044 | Med Gasoline to EA-215                     |
| 4522 | C <sub>3</sub> - Vent Gas to FA-205      | 3037 | EA-215 Outlet                              |
| 3028 | Liquid from FA-205                       | 3043 | Recycle Liquid to FA-204                   |

### IV.1.3 Unit Operation

Codes list and description of the operating units involved in Stage 1 are summarized in Table IV.2.

**Table IV. 2 Process Equipment of Stage 1**

| <b>Name</b>       | <b>Description</b>                                         |
|-------------------|------------------------------------------------------------|
| FA-201            | Charge Gas Compressor 1 <sup>st</sup> Stage Suction Drum   |
| FA-202            | Charge Gas Compressor 2 <sup>nd</sup> Stage Suction Drum   |
| FA-203            | Medium Gasoline Flash Drum                                 |
| FA-204            | Charge Gas Compressor 3 <sup>rd</sup> Stage Suction Drum   |
| FA-205            | Charge Gas Compressor 3 <sup>rd</sup> Stage Discharge Drum |
| GB-201            | Compressor stage 1, 2, 3                                   |
| GA-201 A/B        | Pump                                                       |
| GA-209 A/B        | Pump                                                       |
| EA-201            | Heat Exchanger                                             |
| EA-202            | Heat Exchanger                                             |
| EA-215            | Heat Exchanger                                             |
| EA-203            | Heat Exchanger                                             |
| EA-213            | Heat Exchanger                                             |
| DA-104            | Process Water Stripper                                     |
| FA-112M           | Dilution Steam Drum                                        |
| EA-114            | Floating Head                                              |
| EA-118 A/B/C/D    | Floating Head                                              |
| EA-119            | Fixed Tube Sheet                                           |
| EA-120            | Fixed Tube Sheet                                           |
| EA-121 A/B        | Fixed Tube Sheet                                           |
| EA-122            | Floating Head                                              |
| GA-110 A/B        | Centrifuge                                                 |
| DA-102M           | Quench Tower                                               |
| EA-116 A/B/C/D    | Quench Water Cooler No. 1                                  |
| EA-117 A/B/C      | Quench Water Cooler No. 2                                  |
| GA-102 A/B        | Gasoline Fractionator Reflux Pump                          |
| GA-108 A/B/C/D    | Quench Water Circulation Pump                              |
| GA-109 A/B/C      | Process Water Stripper Feed Pump                           |
| DA-101M           | Gasoline Fractionator                                      |
| DA-103M           | FPO Stripper                                               |
| PA-104            | Quench Oil Filter Package                                  |
| GA-101A/B/C/D     | Pump                                                       |
| GA-103A/B         | Pump                                                       |
| GA-107A/B         | Pump                                                       |
| EA-114            | Heat Exchanger                                             |
| EA-118A/B/C/D/E/F | Heat Exchanger                                             |
| EA-115A/B         | Heat Exchanger                                             |
| FD-101A/B/C/D     | Strainer                                                   |
| FD-102A/B         | Strainer                                                   |
| HB-110            | Viscosity Control Quench Fitting                           |

#### IV.1.4 Simulation Approach and Assumption

Some of the assumptions and approachment that taken in the simulation are as follows.

- a. Input components are showing in the Table IV.3.

**Table IV. 3. Simulation Component of Stage 1**

| <b>No.</b> | <b>Design Name</b>                      | <b>Simulation Name</b> |
|------------|-----------------------------------------|------------------------|
| 1          | Hydogen                                 | Hydrogen               |
| 2          | Carbon Monoxide                         | CO                     |
| 3          | Carbon Dioxide                          | CO <sub>2</sub>        |
| 4          | Hydrogen Sulphide                       | H <sub>2</sub> S       |
| 5          | Methane                                 | Methane                |
| 6          | Acetylene                               | Acetylene              |
| 7          | Ethylene                                | Ethylene               |
| 8          | Ethane                                  | Ethane                 |
| 9          | Propadiene/Propyne                      | Propadiene             |
| 10         | Propylene                               | Propene                |
| 11         | Propane                                 | Propane                |
| 12         | Butadienes/C <sub>4</sub><br>Acetylenes | 13-Butadiene           |
| 13         | Butylenes                               | 1-Butene               |
| 14         | Butanes                                 | n-Butane               |
| 15         | C <sub>5</sub> Hydrocarbons             | i-Pentane              |
| 16         | C <sub>6</sub> Non-Aromatics            | 1-Hexyne               |
| 17         | C <sub>7</sub> Non-Aromatics            | n-Heptane              |
| 18         | C <sub>8</sub> Non-Aromatics            | n-Octane               |
| 19         | Benzene                                 | Benzene                |
| 20         | Toluene                                 | Toluene                |
| 21         | Xylenes/Ethylbenzene                    | p-Xylene               |
|            |                                         | E-Benzene              |
| 22         | Styrene                                 | Styrene                |
| 23         | C <sub>9</sub> – 204°C                  | o-MStyrene             |
|            |                                         | 123-MBenzene           |
|            |                                         | 1-Undecene             |
| 24         | 204 – 288°C (PGO)                       | 1-Undecyne             |
|            |                                         | Hex-M-Benz             |
|            |                                         | n-C <sub>13</sub>      |
|            |                                         | n-C <sub>14</sub>      |
|            |                                         | n-C <sub>15</sub>      |
| 25         | 288°C Plus (PFO)                        | n-C <sub>17</sub>      |
|            |                                         | n-C <sub>20</sub>      |

**Simulation Report – ECC 860 KTA**  
**Working Stage 6**

---

|    |             |                   |
|----|-------------|-------------------|
|    |             | n-C <sub>23</sub> |
|    |             | n-C <sub>26</sub> |
|    |             | n-C <sub>28</sub> |
|    |             | n-C <sub>30</sub> |
| 26 | Steam/Water | H <sub>2</sub> O  |

Some compounds are divided into several isomers of the compounds that may be present. In addition, C<sub>9</sub>, PGO, and PFO are divided into compounds with boiling point range which is adapted to provide an overview column profiles and appropriate operating conditions. The components used to represent all these compounds derived from components defined in HYSYS and do not use hypo that inputted manually.

- b. The simulation used Peng-Robinson as fluid package because the simulation involve hydrocarbon compounds for stage 1 unit 1 and 3. For unit 2, the fluid package used is UNIQUAC-ideal and for unit 3 is SRK. The difference of any fluid package is only in the calculation and those fluid package give the best error calculation among others.
- c. The streams data that used follow Case 2 of Basic Engineering Design.
- d. Column design data used as a basis of calculation. In addition, the efficiency of the columns used are adjusted to produce the desired product.
- e. Adiabatic efficiency of the pump is 75% (default on HYSYS)
- f. The feed preheating is not simulated because of lack of data. Heat recovery is described as the heat contained by streams.
- g. Packing in Quench Tower Column is illustrated as tray column with a ratio of real HETP and column high contained in the design.
- h. Dilution Steam Drum is simulated using separator that given duty to produce a flow rate above the desired product



#### **IV.1.5 Simulation PFD**

The simulation PFD is shown in Figure IV.2.

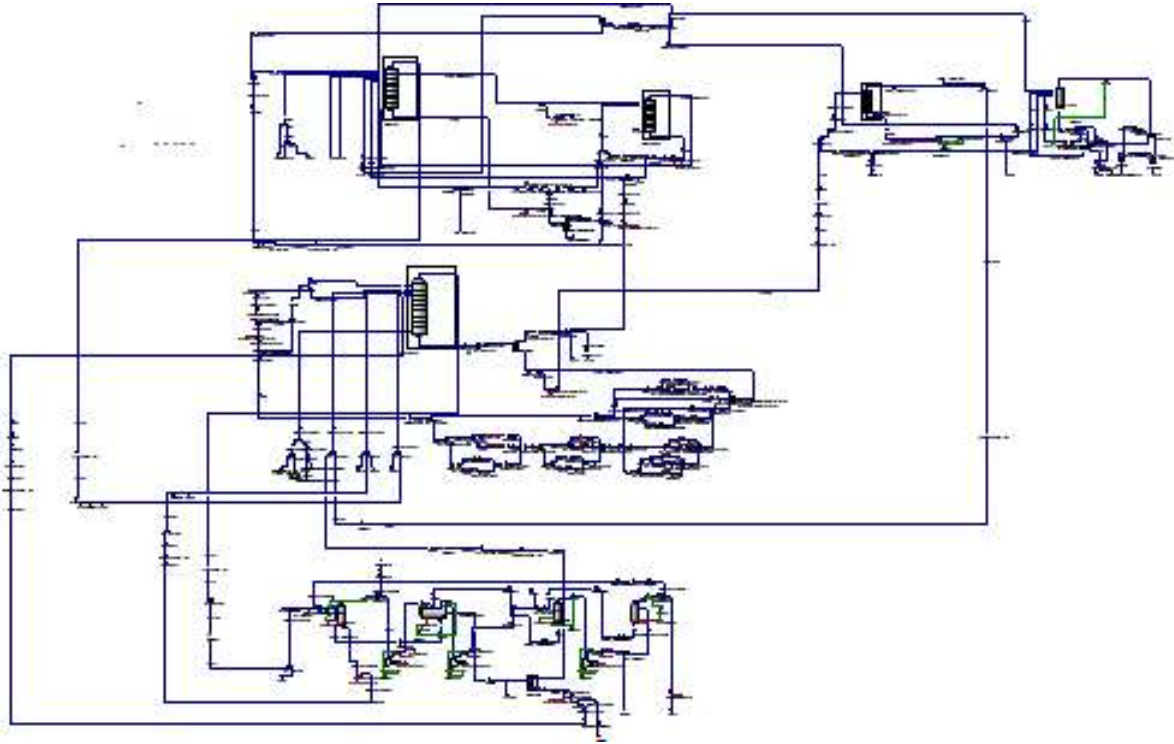

**Figure IV. 2. Simulation PFD of Gasoline Fractionator and PFO Stripper**

#### **IV.1.6 Simulation Result and Evaluation**

The stage simulation has achieved convergence. Result for integration stage is evaluated using data from design versus data from streams after integration. In the Stage 1, there are 5 units that already integrated into 1 simulation. The integration process uses cutter units to calculate the differences of fluid package and recycle units to recalculate streams using new data from other fluid package. The differences of fluid package can make error occur in the stream and unit operation such as columns, vessels, and reactors.

Stage 1 integration will be discussed into 2 part, there are profil temperature discussion and mass balance discussion. Figure IV.3 below show the evaluation in profil temperature between the design data compared to the integration data.

## Simulation Report – ECC 860 KTA

### Working Stage 6

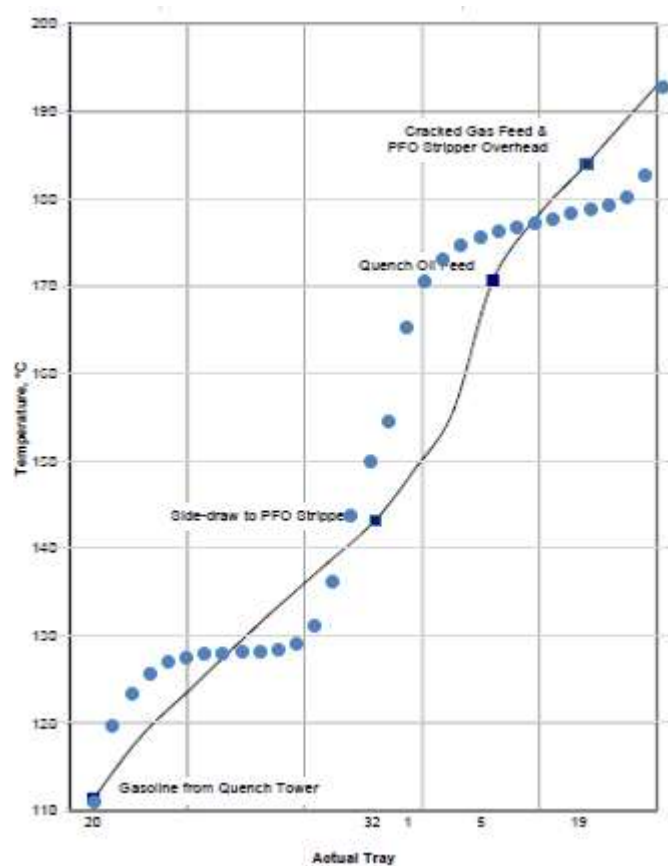

A

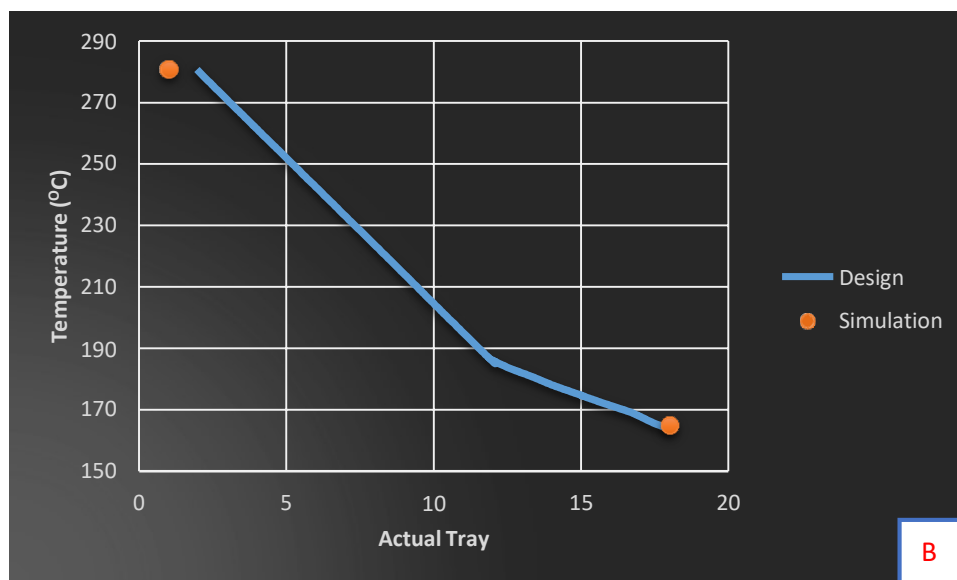

B

## Simulation Report – ECC 860 KTA

### Working Stage 6

---

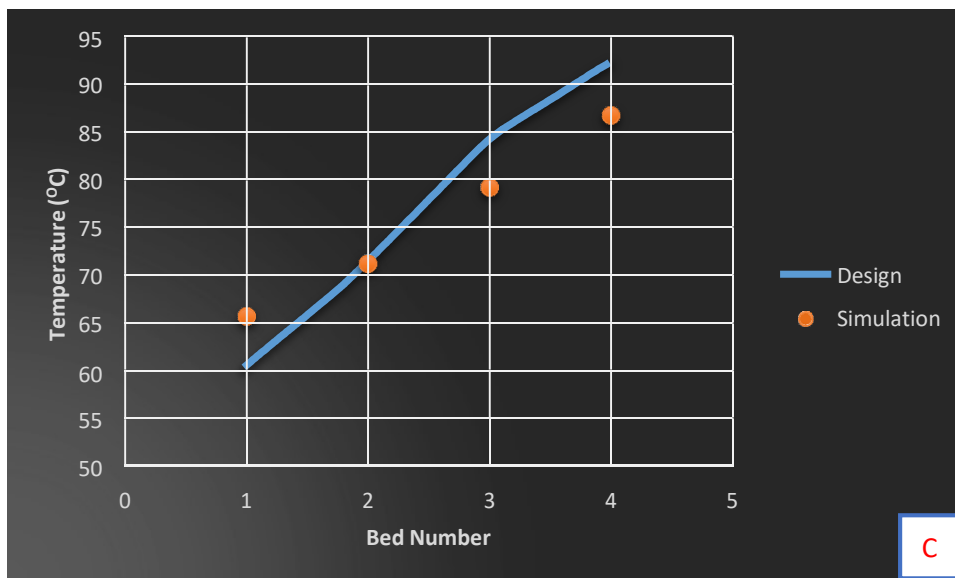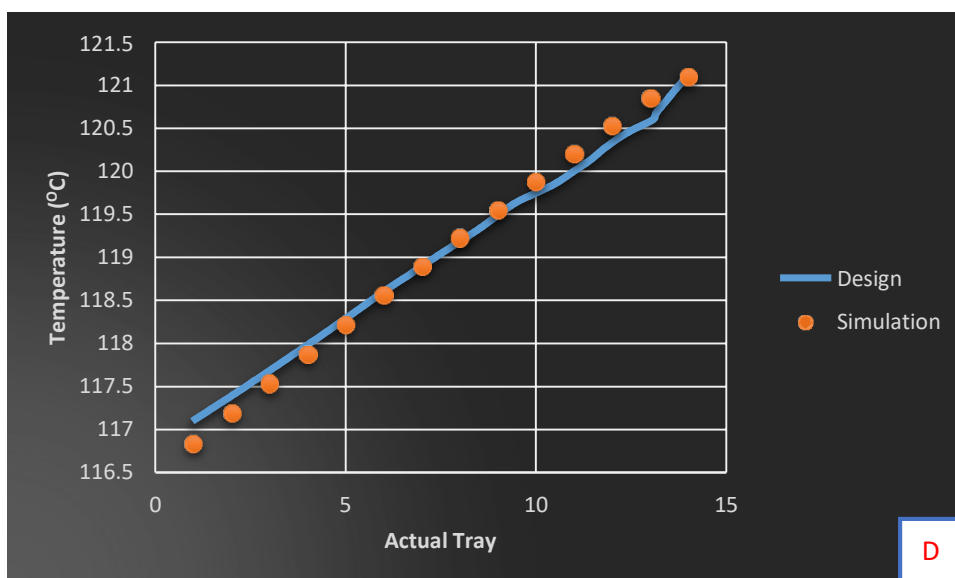

Figure 9.7  
DA-204 - Gasoline Stripper  
Temperature Profile - Design Case

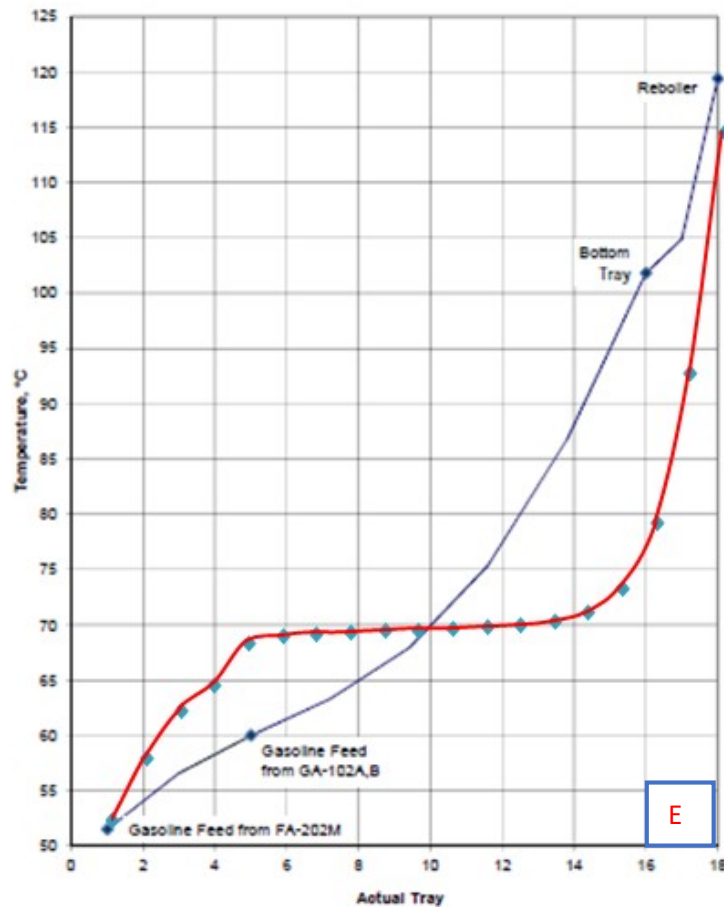

**Figure IV. 3. Profil Temperature of Column DA-101(A), DA-103(B), DA-102(C),  
DA-104(D), and DA-204(E)**

In general, Differences exist between simulation and design, in particular on temperature profile. This is due to the fact that the components listed on design specification are not clearly stated. In order to tackle this issue, it is decided to make a prediction about the identity of the component based on molecular weight. This however yield to an error on the temperature profile. However, the target composition and properties in both inlet and outlet are within the design specification. Therefore, the simulation is acceptable.

Simulation yields a satisfied result according to the design specifications that can be seen from the error value of mass balance. The largest error occurred in unit 2 on the temperature of Stream 2117 at 17.5% while The second largest process condition error of 8.5% is found in the temperature of Stream 2109. In flow 2510 unit 3, the error on temperature is 7.5%. Other than these, the error are consistent below 5% with majority below 1%.

## **IV.2 Simulation Integration Stage 2**

### **IV.2.1 Process Description**

Vapor outlet from discharge drum 3<sup>rd</sup> stage compressor is fed into caustic/water wash tower to strip the acid components. The components being stripped are CO<sub>2</sub> and H<sub>2</sub>S. This process is necessary to keep the downstream product specification requirement.

After contacted with caustic in the tower, charge gas is washed with water to avoid any carryover into the downstream flow. Spent caustic from the tower bottom is fed into spent caustic pre-treatment to be washed with gasoline.

Changes of equipment in the new PFD for 820KTA compared to the older version of PFD are:

- Additional Caustic/water wash tower no. 2 (DA-203), work in series with D-202
- Removal of tray and mist eliminator on tower DA-202
- Dessicant replacement on K.O. Drum FF-201A,B
- Additional K.O. Drum FF-201 C parallel to FF-201A,B

Spent caustic solution from the caustic wash tower bottom cannot be directly released into the environment without further treatment. This solution contains sodium carbonate, sodium sulfide and trace sodium hydroxide. This solution may also contain a dispersed hydrocarbon.

The dispersed hydrocarbon may cause fouling in the stripping section, thus have to be removed with gasoline wash. Gasoline used comes from the quench tower. After being mixed, spent caustic solution and spent gasoline are separated with coalescer. Spent gasoline is then water washed to reduce the caustic content that may change the acidity in quench tower. Wash water is mixed with caustic solution and treated further in spent caustic oxidation.

Charge gas is being fed into 4<sup>th</sup> stage suction drum for two phase separation. The liquid phase consists of hydrocarbon and condensate and separated further in quench tower and the vapor phase is compressed in GB-201 4<sup>th</sup> stage compressor. Compressed gas mixed with steam and cooled before separated in 5<sup>th</sup> stage suction drum.

The mixed gas is being fed into 5<sup>th</sup> stage suction drum, along with HP off gas. The bottom product is recycled into 4<sup>th</sup> stage suction drum, the overhead product is compressed in 5<sup>th</sup> stage of GB-201, and the side product goes to Condensate Stripper Feed Coalescer.

The compressed gas from 5<sup>th</sup> stage of GB-201 is being cooled before separated in 5<sup>th</sup> discharge drum. The bottom product is recycled into 5<sup>th</sup> stage suction drum, and overhead product is being cooled twice before separated in Dryer Feed Drum. The bottom and side product is recycled into other drum, the overhead product, that is charge gas, goes to FF-201.

Separated hydrocarbon from Condensate Stripper Feed Coalescer is stripped in condensate stripper. The condensate is stripped of its ethane content with help of a reboiler. Bottom product is fed into depropanizer and overhead vapor is recycled into 4<sup>th</sup> stage suction drum.

Cracked gas chilling is the process of heat exchange of the various gases product. The basic principle is utilization of material streams which will in-cooled heat exchanged with the stream of material to be heated.

The hot feed streams are as follow:

- Stream 4309 Ethane
- Stream 4011 Hydrogen From FA-301 A,B
- 4107 Cracked Gas Stream From the EA-317
- Stream 4102 Charged Gas From EA-409

While the cold feed stream:

- Stream 4013 Ethane From DA-302
- Stream 4014 Hydrogen From DA-302
- Bottom stream Demethanizer 4156 Product of the GA-301 A,B
- Stream 4167 HP Methane From DA-301
- Stream 4307 Ethane From DA-402
- Ethylene Stream HP 4324 Product of the GA-1803 A,B

Charge gas from dryer is chilled using enhanced binary refrigerant (EBR) before it is sent to demethanizer. Charge gas is first fed through heat exchanger (EA-326X). The condensed gas is then sent to separator (FA-312), where the liquid stream leaving FA-312 is cooled further in EA-333X and then split into two stream that will become demethanizer (DA-301M) feed. Vapor stream from FA-312 is cooled in EA-334CX. This stream is then separated in FA-313. Liquid stream from FA-313 is sent to demethanizer (DA-301M). Vapor stream from FA-313 is cooled further in EA-334BX and then separated in FA-314. Liquid stream from FA-314 is sent to demethanizer and vapor stream is then cooled again in EA-334AX and then separated in FA-315. Liquid stream from FA-315 contain high pressure methane and vapor stream from FA-315 contain hydrogen. These streams are then heated in EA-334AX, EA-334BX, EA-334CX, EA-326X, and EA-327X. From EA-327X, high pressure methane is fed to fuel gas system and hydrogen is fed to methanator.

EBR stream is first cooled in EA-327X and then separated in FA-655. Both vapor and liquid stream from FA-655 are cooled again in EA-327X. Vapor product from FA-655 is condensed in EA-326X, and then enter FA-656. Liquid stream from FA-656 is split into two stream, stream 5250 and 5213. Stream 5250 is used to cool liquid ethane from DA-402M, while stream 5213 is used to cool charge gas in EA-334BX, EA-334CX, and EA-326X. Liquid product from FA-655 is used to cool charge gas in EA-326X only.

Other streams that are used to cool EBR in EA-327X are:

1. Ethylene recycle stream from DA-402M
2. HP Ethylene product stream from GA-1083
3. Demethanizer bottoms stream from GA-301.

**Simulation Report – ECC 860 KTA**  
**Working Stage 6**

---

## IV.2.2 Stream List

The process streams involved in the Stage 2 are tabulated as in Table IV.4.

**Table IV. 4. Stream List of Stage 2**

| <b>Name</b> | <b>Description</b>                             | <b>Name</b> | <b>Description</b>                    |
|-------------|------------------------------------------------|-------------|---------------------------------------|
| 1110        | HPFL Off Gas                                   | 4707        | Charge Gas from EA-327 to EA-326X     |
| 1210        | Hydrogen Feed to DC-1201                       | 4708        | Charge Gas from EA-326X to FA-312     |
| 3012        | Caustic Tower Overhead                         | 4809        | Vapor from FA-312                     |
| 3013        | Charge Gas Compressor 4th Stage Suction        | 4710        | Liquid from FA-312                    |
| 3014        | Charge Gas Compressor 4th Stage Discharge      | 4712        | Charge Gas to FA-313                  |
| 3015        | EA-204 Outlet                                  | 4713        | Vapor from FA-313                     |
| 3016        | Feed to FA-206                                 | 4714        | Liquid from FA-313                    |
| 3017        | Charge Gas Compressor 5th Stage Suction        | 4715        | Charge Gas to FA-314                  |
| 3018        | Charge Gas Compressor 5th Stage Discharge      | 4716        | Vapor from FA-314                     |
| 3019        | EA-205 Outlet                                  | 4717        | Liquid from FA-314                    |
| 3020        | Charge Gas Compressor 5th Discharge Drum Vapor | 4718        | Charge Gas to FA-315                  |
| 3021        | EA-206 Outlet                                  | 4719        | Vapor from FA-315                     |
| 3022        | EA-207 Outlet                                  | 4720        | Liquid from FA-315                    |
| 3023        | Dryer Feed Drum Vapor                          | 4721        | H <sub>2</sub> Rich Letdown before CV |
| 3029        | Liquid from FA-206                             | 4722        | H <sub>2</sub> Rich Letdown after CV  |
| 3030        | Charge Gas Compressor 5th Suction Drum Water   | 4723        | FA-315 Vapor to EA-334AX              |
| 3031        | Liquid from FA-208                             | 4724        | FA-315 liquid to EA-334AX             |
| 3032        | Dryer Feed Drum Water                          | 4725        | HP Methane to EA-334AX                |
| 3033        | Dryer Feed Drum HC-Liq                         | 4726        | HP Methane from EA-334AX              |
| 3034        | Charge Gas Compressor 5th Suction Drum HC-Liq  | 4727        | HP Methane to EA-334BX                |
| 3039        | Recycle Liquid to FA-207                       | 4728        | HP Methane form EA-327AX              |
| 3050        | Feed to FA-208                                 | 4729        | Hydrogen from EA-327X                 |
| 3201        | Feed to DA-201                                 | 4732        | New Demeth Feed Split No.1            |
| 3202        | Condensate Stripper Overhead                   | 4733        | New Demeth Feed Split No.2            |
| 3203        | Condensate Stripper Bottoms                    | 4741        | New Demeth Feed No.1                  |
| 3204        | EA-211 Inlet                                   | 4742        | New Demeth Feed No.2                  |
| 3205        | EA-211 Outlet                                  | 4743        | New Demeth Feed No.3                  |
| 3206        | Outlet EA-212                                  | 4744        | New Demeth Feed No.4                  |
| 4202        | Lower Deethanizer Feed                         | 4767        | HP Methane to EA-334BX                |
| 4237        | Lower Deethanizer Feed from EA-                | 5208        | FA-654 Vapor to EA-327X               |

**Simulation Report – ECC 860 KTA**  
**Working Stage 6**

|      |                                               |      |                                      |
|------|-----------------------------------------------|------|--------------------------------------|
|      | 208                                           |      |                                      |
| 2121 | Wash Gas to EA-214                            | 5209 | EBR from EA-327X to FA-655           |
| 2505 | Wash Water to EE-902                          | 5210 | Light EBR from FA-655 to EA-327X     |
| 3306 | Spent Caustic to EE-901                       | 5211 | Light EBR to EA-326X                 |
| 3901 | Feed to FA-901                                | 5212 | Light EBR to FA-656                  |
| 3902 | Spent Gasoline to FA-902                      | 5213 | Light EBR to EA-334CX                |
| 3903 | Spent Caustic from FA-901                     | 5215 | Medium EBR from FA-655 to EA-327X    |
| 3904 | Feed to FA-902                                | 5216 | Medium EBR to EA-327X                |
| 3905 | Spent Caustic from FA-902                     | 5217 | Medium EBR to EA-326X                |
| 3906 | Spent Caustic to B. L.                        | 5218 | Medium EBR from EA-326X              |
| 3907 | Spent Caustic from FA-902                     | 5219 | Medium EBR to FA-651                 |
| 3908 | Wash Gasoline from EA-210                     | 5220 | Light EBR from EA-334BX              |
| 3301 | Make-Up Caustic from FB-201                   | 5221 | Light EBR to EA-334BX after CV       |
| 3011 | Charge Gas Heater Effluent                    | 5222 | Light EBR from EA-326X to FA-651     |
| 3012 | Caustic Tower Overhead                        | 5223 | Enhance Binary Refrigerant to FA-651 |
| 3023 | Dryer Feed Drum Vapor                         | 5230 | Heavy EBR from EA-327X to EA-653     |
| 3024 | Dryer Effluent                                | 5231 | Medium EBR from EA-327X to EA-653    |
| 3302 | Strong Caustic from DA-202                    | 5232 | Enhance Binary Refrigerant to EA-653 |
| 3303 | Strong Caustic from GA-207                    | 5250 | Light EBR to EA-335X                 |
| 3304 | Weak Caustic from DA-202                      | 5251 | Light EBR from EA-335X               |
| 3305 | Weak Caustic from GA-206                      | 5252 | Light EBR to EA-326X                 |
| 3306 | Spent Caustic to EE-901                       | 5253 | Light EBR from EA-326X               |
| 3307 | Water to Water Wash                           | 4325 | C2 Product to EA-335X                |
| 3308 | Make-Up from Water Wash                       | 4326 | C2 Product from EA-335X              |
| 4101 | Charge Gas from EA-308                        | 4061 | Ethane Recycle to EA-330             |
| 4236 | Demethanizer Bottom to Lower Deethanizer Feed | 4062 | Ethane to EA-330                     |
| 4237 | Lower Deethanizer Feed from EA-308            | 4063 | Ethane Recycle to EA-327X            |
| 4757 | Demethanizer Bottoms from EA-327X             | 4064 | Ethane Recycle to EA-112R            |
| 4758 | DA-301M BTMS to Upper DA-401M Feed            | 4702 | Charge Gas from EA-449 to EA-330     |
| 4759 | Deethanizer Upper Feed From EA-327X           | 4703 | Charge Gas from EA-330 to EA-336     |
| 4760 | DA-301M BTMS to Lower DA-401M Feed            | 4328 | HP Ethylene Product to EA-327X       |
| 4761 | Deethanizer Lower Feed to EA-                 | 4329 | HP Ethylene Product from EA-         |



**Simulation Report – ECC 860 KTA**  
**Working Stage 6**

---

|      |                                 |  |      |
|------|---------------------------------|--|------|
|      | 327X                            |  | 327X |
| 4756 | Demethanizer Bottoms to EA-327X |  |      |

### IV.2.3 Unit Operation

Codes list and description of the operating units involved in Stage 2 are summarized in Table IV.5.

**Table IV. 5. Process Equipment that used in Stage 2**

| <b>Name</b> | <b>Description</b>                             |
|-------------|------------------------------------------------|
| FA-901      | Spent Caustic Coalescer                        |
| FA-902      | Spent Gasoline Coalescer                       |
| EA-214      | Wash Gasoline Cooler                           |
| GA-901A,B   | Spent Caustic Coalescer Gasoline Pump          |
| GA-902      | Spent Gasoline Coalescer Gasoline Pump         |
| FB-201      | Caustic Storage Tank                           |
| FA-211      | Yellow Oil Drum                                |
| DA-202      | Caustic/Water Wash Tower                       |
| FA-201A,B   | Charge Gas Dryers                              |
| FA-209      | Dryer Regeneration K.O. Drum                   |
| GA-208A,B   | Caustic Make-Up Pump                           |
| GA-206      | Weak Caustic Circulation Pump                  |
| GA-207A,B   | Strong Caustic Circulation Pump                |
| EA-308A,B   | Dryer Effluent Chiller                         |
| EA-209      | Dryer Regeneration Gas Cooler                  |
| EA-210      | Dryer Regeneration Gas Heater                  |
| DA-203      | Caustic/Water Wash Tower no. 2                 |
| FA-206      | Charge Gas Compressor 4th Stage Suction Drum   |
| FA-207      | Charge Gas Compressor 5th Stage Suction Drum   |
| FA-208      | Charge Gas Compressor 5th Stage Discharge Drum |
| FA-210      | Dryer Feed Drum                                |
| DA-201      | Condensate Stripper                            |
| GB-201      | Charge Gas Compressor                          |
| EA-204      | Charge Gas Compressor 4th Stage Aftercooler    |
| EA-205      | Charge Gas Compressor 5th Stage Aftercooler    |
| EA-206      | Dryer Feed Chiller No. 1                       |
| EA-207      | Dryer Feed Chiller No. 2                       |
| EA-211      | Condensate Stripper Reboiler                   |
| EA-212      | Condensate Stripper Bottoms Cooler             |
| GA-205A,B   | Dryer Feed Drum Pump                           |
| FA-302      | Charge Gas 1 <sup>st</sup> Stage Flash Drum    |
| FA-303      | Charge Gas 2 <sup>nd</sup> Stage Flash Drum    |

**Simulation Report – ECC 860 KTA**  
**Working Stage 6**

---

|          |                                                |
|----------|------------------------------------------------|
| FA-304   | Charge Gas 3 <sup>rd</sup> Stage Flash Drum    |
| FA-305   | Charge Gas 4 <sup>th</sup> Stage Flash Drum    |
| FA-306   | Charge Gas 5 <sup>th</sup> Stage Flash Drum    |
| EA-307X  | Heat Exchanger                                 |
| EA-314AX | Heat Exchanger                                 |
| EA-314BX | Heat Exchanger                                 |
| EA-314CX | Heat Exchanger                                 |
| EA-314DX | Heat Exchanger                                 |
| EA-313X  | Heat Exchanger                                 |
| EA-309   | Heat Exchanger                                 |
| EA-310   | Heat Exchanger                                 |
| EA-311   | Heat Exchanger                                 |
| EA-312   | Heat Exchanger                                 |
| EA-315   | Heat Exchanger                                 |
| EA-412   | Heat Exchanger                                 |
| FA-312   | Second Demethanizer Feed Separator No. 1       |
| FA-313   | Second Demethanizer Feed Separator No. 2       |
| FA-314   | Second Demethanizer Feed Separator No. 3       |
| FA-315   | Second Demethanizer Feed Separator No. 4       |
| FA-655   | Medium Enhanced Binary Refrigerant Accumulator |
| FA-656   | Light Enhanced Binary Refrigerant Accumulator  |
| FA-657X  | Enhanced Binary Refrigerant Retrograde Drum    |
| EA-327X  | Heat Exchanger                                 |
| EA-326X  | Heat Exchanger                                 |
| EA-333X  | Heat Exchanger                                 |
| EA-334CX | Heat Exchanger                                 |
| EA-334BX | Heat Exchanger                                 |
| EA-334AX | Heat Exchanger                                 |
| EA-335X  | Heat Exchanger                                 |
| EA-330   | Heat Exchanger                                 |

#### **IV.2.4 Simulation Approach and Assumption**

There are several assumption used in simulating the process with Aspen HYSYS, which are:

- a. Because HYSYS license does not include Oli Electrolyte, the caustic reaction performed using a conversion reactor.
- b. Fluid Package for Stage 2 are Peng Robinson, UNIQUAC, SRK, and Chao-Seader for any units.
- c. To adjust the temperature of each separation and simulate heat loss, every separation unit is equipped with it's own energy stream.

- d. Caustic and its reaction products components' solubility are not known. Thus, the simulator cannot perform an absorber routine calculation. The separation is performed using a component splitter as DA-202 and DA-203 tower.
- e. Each heat exchanger contained in the PDF process is simulated as a separated heater-cooler (not integrated with the flow in other units). The flow rate of each stream using the base unit kg-mole/hr.
- f. The temperature of the exit of each zone Heat Exchanger have relatively same temperature.
- g. No leaks in the material out of the Heat Exchangers.
- h. Stream material in the system Cracked Gas Chilling assumed no change in temperature during the piping flow.
- i. Stream flow in the heat exchanger in a steady state.

#### **IV.2.5 Simulation PFD**

The simulation PFD is shown in Figure IV.4.

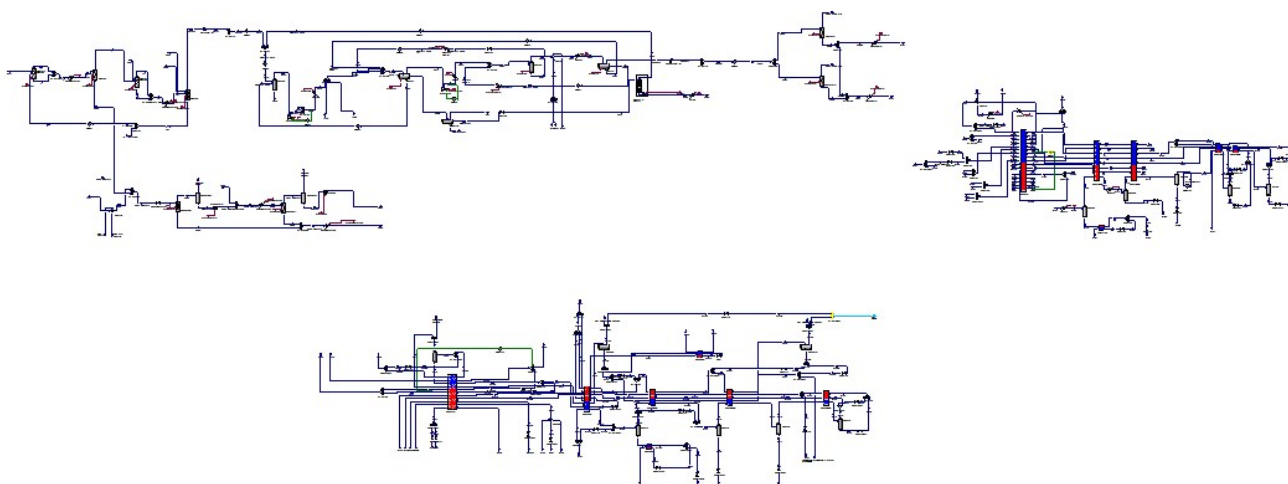

**Figure IV. 4. PFD of Stage 2 Integration in HYSYS**

#### **IV.2.6 Simulation Result and Evaluation**

The integration simulation has been conducted and it is convergent. Result for integration stage is evaluated using design data versus data from streams after integration. In the Stage 2, there are 5 units that already integrated into a single integrated simulation. The integration process uses cutter units to calculate the differences of fluid package and recycle units to recalculate streams using new data from other fluid package. The differences of fluid package can make error occur in the stream and unit operation such as columns, vessels, and reactors.

Stage 2 integration will be discussed into 2 part, there are profil temperature discussion and mass balance discussion. Figure IV.5 below show the evaluation in profil temperature between the units data compare to the integration data.

Figure 9.5  
DA-201M - Condensate Stripper  
Temperature Profile - Design Case

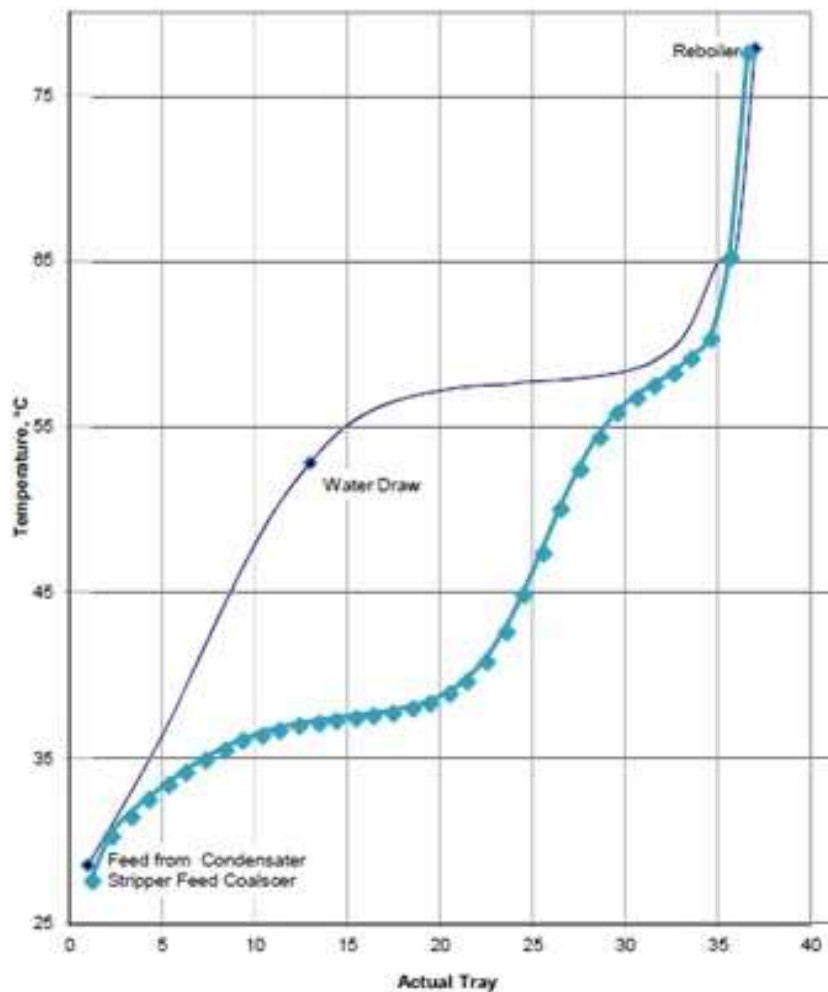

**Figure IV. 5. Temperature Profile of DA-201**

There are significant temperature differences between tray 1 to tray 35. The difference shows an opposite trend compared to the design data. However, the properties of the flow in the inlet and outlet of the column has been achieved. Further justification of the data is needed.

The biggest error occurred in pressure at stream 3023 which is 56.95%. Other significant error also occurred at Spent Caustic Pre-Treatment stream 3093 with error around 6.71% at the molar flow. Other than that, the errors are either lower than 3% or insignificant in terms of its respective quantity.

### IV.3 Simulation Integration Stage 3

#### IV.3.1 Process Description

The condensed liquids from the charge gas chilling train along with the vent gas from ethylene fractionation are sent to the appropriate beds of the demethanizer. This tower is operated at a pressure just high enough to permit use of the overhead methane product for

dryer regeneration and still be at fuel gas pressure.

The demethanizer is reboiled with charge gas in the bottom and side reboiler. The bottom product passes through the cold box, and then is split into two streams. One stream is sent directly to the deethanizer as a liquid stream. The other, which is the major part, is also sent to the deethanizer, but only after vaporization by further preheat against charge gas in dryer effluent chiller and fifth stage discharge vapor in dryer feed chiller No. 1.

The overhead of the demethanizer is split into two streams, one stream is mixed with reflux drum liquid and sent to the cold box as high pressure methane refrigerant. After being reheated a portion is compressed and used as gas turbine fuel. The remainder is sent directly to the fuel gas system after being used to regenerate the charge gas dryers. The other stream is heated and compressed. The compressor discharge is chilled by demethanizer overhead vapor and condensed by ethylene refrigerant and then it is sent to the reflux drum. The vapor from the reflux drum is mixed with part of the demethanizer overhead going to the cold box. Part of the liquid from the reflux drum is mixed with part of the liquid from reflux drum is sent to the demethanizer as reflux. The remainder reflux drum liquid is mixed with demethanizer overhead as discussed above and sent to cold box as methane refrigerant.

The methanation section takes raw hydrogen (96% hydrogen) generated in the hydrogen methane separator no. 2 and prepares it for use in the downstream hydrogenation process. This involves two primary processing steps:

- Methanation is the conversion of the carbon monoxide in the hydrogen to methane and water. CO is a catalyst poison in the downstream hydrogenation reactions.
- Drying of the hydrogen is required for the C2 and C3 hydrogenation as water is a poison to these catalysts.

The hydrogen streams from two cold boxes are first mixed into one single new stream. Then, the new stream is heat interchanged with effluent from the methanator and then further heated using high pressure steam to the reaction temperature of 288°C. This temperature is required to initiate the reaction. The conversion of the CO is an exothermic reaction, therefore, the methanator temperature should be monitored closely as runaway reactions can result.

Reactor effluent is used to heat the feed and is then cooled against cooling water. The hydrogen stream is further cooled to 16°C by propylene refrigerant. Condensed water is separated in the hydrogen dryer K.O. drum. Part of the hydrogen leaving the drum goes to the hydrogen dryers. This hydrogen is ultimately used in the acetylene, MAPD, and C4/C5 hydrogenation reactors. The balance of the hydrogen is sent to the DPG hydrogenation reactors or, if not required, may be used as fuel gas. Two hydrogen dryers are provided to accommodate the periodic regenerations required. The dry hydrogen stream is split into three streams. The first stream goes to the MAPD converters, the second stream goes to C4/C5 hydrogenation, and the third stream goes to the cold box before entering the ethane wash column. In the ethane wash column 96% hydrogen is converted to 99%+ hydrogen is used in the acetylene converters and as a high purity hydrogen product.

The demethanizer bottoms product, which is split into two streams as described in the

demethanizer section, feeds the deethanizer. The deethanizer reflux is supplied by condensing the overhead vapors with propylene refrigerant. The column is reboiler either with quench water or in the spare reboiler utilizing low pressure steam.

Acetylene is removed from the net deethanizer overhead product by selective hydrogenation to ethylene and ethane in a two bed acetylene converter with intercooling. A one reactor system with three beds is provided. Two beds of the reactor remain in the service, while the third bed can be regenerated without interrupting plant operation.

The required hydrogen is added to the deethanizer overhead, and the total stream is then preheated against the converter effluent and low pressure steam, and passed over the first catalyst bed. The temperature rise is proportional to the percentage of hydrogen added to the feed. A safety monitor is provided to shut off the hydrogen in the event that the reactor temperature becomes excessive. The effluent from the first bed is cooled, mixed with more hydrogen and then passed over the second catalyst bed to complete acetylene conversion. The effluent from the second bed, containing less than 2 ppm of acetylene, in relation to ethylene, is cooled by water and by exchange with the converter feed.

During hydrogenation, a small portion of the acetylene is converted to a polymer called green oil. This material interferes with the proper drying of the ethylene fractionator feed. The drying step is essential to avoid icing problems. This green oil is removed by contacting the gas in the green oil knock-out drum with a slipstream of ethylene/ethane liquid stream taken as a side drawn from the ethylene fractionator. The green oil knock-out drum bottoms liquid, containing green oil, is recycled back to the deethanizer. The contained green oil leaves with the deethanizer bottoms to the depropanizer and ends up in the raw pyrolysis gasoline. The overhead vapor from the green oil drum passes to the ethylene fractionator through the ethylene dryer. The ethylene dryer consists of a single molecular sieve bed.

The ethylene fractionator has one bottom reboiler and two side reboilers permitting the maximum cold recuperation from this tower. The side reboilers are against charge gas and ethylene refrigeration compressor discharge. The main reboiler is against propylene refrigeration. The tower is condensed with propylene refrigeration. Vent gasses from reflux drum, consisting primarily of excess hydrogen from the acetylene converters, are recycled to the demethanizer.

Ethane is withdrawn from the ethylene fractionator bottom, vaporized against charge gas, reheated in the cold box against propylene refrigerant, and recycled to the cracking heaters. A slip stream of the ethane recycle is used in the ethane wash system as previously discussed.

Liquid ethylene product is taken as a tower side draw. The product splits into 3. One stream flows to H.P. storage and one is chilled before mixed with the last one. Before mixing, the last stream is subcooled against C2 refrigerant and goes to low temperature storage. From the H.P. storage tank, product is withdrawn with a transfer pump. A high pressure ethylene product stream, at 38.5 kg/cm<sup>2</sup>g, is pumped, vaporized against propylene refrigerant and then superheated before delivery to Battery Limits as vapor products. In addition, a steam vaporizer is installed to back-up vapor products pressure in the high pressure product stream.

**Simulation Report – ECC 860 KTA**  
**Working Stage 6**

---

### IV.3.2 Stream List

Process streams of Stage 3 are tabulated in Table IV.6.

**Table IV. 6. Process Streams of Stage 3**

| <b>Name</b> | <b>Description</b>                 | <b>Name</b> | <b>Description</b>                |
|-------------|------------------------------------|-------------|-----------------------------------|
| 4210        | Deethanizer Reboiler Return        | 4104        | Charge Gas from EA-310            |
| 4202        | Lower Deethanizer Bottom           | 4105        | Charge Gas from EA-316            |
| 4203        | Deethanizer Gross Overhead         | 4106        | Charge Gas from EA-311            |
| 4204        | Deethanizer Condenser Outlet       | 4107        | Charge Gas to EA-312              |
| 4205        | Deethanizer Net Overhead           | 4143        | Demethanizer Feed No. 3           |
| 4206        | Deethanizer Reflux                 | 4142        | Demethanizer Feed No. 2           |
| 4097        | H2 to DC-401                       | 4144        | Demethanizer Feed No. 4           |
| 4207        | Deethanizer Net Bottom             | 4155        | DA-301 Bottoms                    |
| 4208        | Deethanizer Bottoms to DA-403      | 4156        | Demethanizer Bottom               |
| 4209        | Deethanizer Reboiler DA-401 Feed   | 4162        | Demethanizer Reboiler Inlet       |
| 4210        | Deethanizer Reboiler Return        | 4163        | Demethanizer Main Reboiler Outlet |
| 4211        | Deethanizer reboiler DA-401        | 4164        | Demethanizer Feed To EA-317       |
| 4212        | Deethanizer Reboiler Return        | 4165        | Demethanizer Side Reboiler Outlet |
| 4213        | Deethanizer Net Overhead After CV  | 4166        | DA-301 Overhead                   |
| 4214        | Deethanizer Net Overhead Preheat 1 | 4167        | HP Methane to EA-314CX            |
| 4215        | C2 Converter Feed to Preheat 2     | 4168        | Demethanizer Overhead to EA-318X  |
| 4216        | C2 Converter Feed to Bed 1         | 4169        | EA-318X Warm Outlet               |
| 4217        | C2 Converter Effluent from Bed 1   | 4170        | Methane to GB-301                 |
| 4218        | C2 Converter Cooler Bed 1          | 4171        | GB-301 First Stage Discharge      |
| 4219        | C2 Converter Feed Bed 2            | 4172        | GB-301 Second Stage Suction       |
| 4220        | C2 Converter Effluent from Bed 2   | 4173        | Fuel to GI-101 Before CV          |
| 4221        | C2 Converter Cooler Bed 2          | 4175        | Fuel to GI-101 After CV           |
| 4222        | C2 Converter Effluent to GO Drum   | 4176        | GB-301 Third Stage Discharge      |
| 4223        | EE-401 Outlet to FA-401            | 4177        | Methane Ref to EA-318X            |
| 4224        | C2 GO KO Drum Overhead             | 4178        | Charge Gas to EA-311              |
| 4225        | C2 GO Drum Bottom to Deethanizer   | 4179        | EA-318X Cooling Effluent          |
| 4226        | C2 Frac Feed DA-402                | 4180        | EA-319 Cooling Effluent           |

**Simulation Report – ECC 860 KTA**  
**Working Stage 6**

|      |                                               |      |                                               |
|------|-----------------------------------------------|------|-----------------------------------------------|
| 4227 | GO Bottom GA-402 Discharge                    | 4181 | EA-318X Cooling Effluent                      |
| 4228 | Deethanizer Reflux GA-401 Discharge           | 4182 | Methane from EA-320                           |
| 4229 | Hydrogen Rich to Top Bed                      | 4183 | Demethanizer Overhead from EA-318X            |
| 4230 | CO Rich to Top Bed                            | 4184 | Vapor from FA-307X                            |
| 4231 | H2 To C2 Converter Bed 1                      | 4185 | Liquid from FA-307X                           |
| 4232 | Hydrogen Rich to Bottom Bed                   | 4186 | Demethanizer Tower Reflux                     |
| 4233 | CO Rich to Bottom Bed                         | 4187 | Methane Refrigerant to EA-314CX               |
| 4234 | H2 to C2 Converter Bed 2                      | 4190 | HP Methane to EA-314CX                        |
| 4253 | Deeth Overhead to EA-443                      | 4193 | EA-336 Feed                                   |
| 4254 | Deeth Condenser from EA-443 to FA-402M        | 4194 | EA-336 Effluent                               |
| 4259 | Deeth Reboiler EA-441 Feed                    | 4198 | EA-337 Effluent                               |
| 4260 | Deeth Reboiler EA-441 Effluent                | 4197 | EA-337 Feed                                   |
| 4265 | Acetylene Converter Effluent from Bed 2       | 4319 | Vent Gas After CV                             |
| 4266 | Acetylene Converter Effluent to Intercooler 2 | 4706 | Charge Gas from EA-336 to EA-337              |
| 4267 | Acetylene Converter Feed to Bed 3             | 4703 | Charge Gas from EA-330                        |
| 4269 | Hydrogen to Acetylene Converter Bed 3         | 4705 | Charge Gas from EA-336                        |
| 4270 | Hydrogen with CO to Acetylene Converter Bed 3 | 4707 | Charge Gas to EA-326X                         |
| 4271 | Hydrogen Comb. to Acetylene Converter Bed 3   | 4741 | Demethanizer Feed from EA-333X                |
| 1102 | Hydrogen Feed                                 | 4742 | Demethanizer Feed from EA-333X                |
| 1201 | Hydrogen Feed to DC-1201                      | 4743 | Demethanizer Feed from FA-313                 |
| 4001 | Hydrogen to Fuel                              | 4756 | Demethanizer Bottom to EA-327X                |
| 4002 | Hydrogen from EA-302                          | 4744 | Demethanizer Feed from FA-313                 |
| 4003 | Hydrogen to DC-301                            | 4767 | High Pressure Methane to EA-334BX             |
| 4004 | DC-301 Effluent                               | 4101 | Charge Gas from EA-308                        |
| 4005 | Hydrogen from DC-301                          | 4102 | Charge Gas to EA-310                          |
| 4007 | Hydrogen from EA-303                          | 4226 | Demethanizer Bottom To Lower Deethanizer Feed |
| 4008 | Hydrogen from FA-301                          | 4301 | C2 Fractionator Overhead                      |
| 4009 | Liquid Water from FA-301                      | 4302 | C2 Fractionator Reflux                        |
| 4010 | Liquid Water to DA-102                        | 4303 | C2 Fractionator Reflux Liquid                 |



**Simulation Report – ECC 860 KTA**  
**Working Stage 6**

|      |                                          |      |                                    |
|------|------------------------------------------|------|------------------------------------|
| 4011 | Hydrogen to EA-307X                      | 4304 | C2 Fractionator GA-405 Discharge   |
| 4012 | Hydrogen to DA-302                       | 4305 | Ethylene Product                   |
| 4013 | Ethane to EA-314CX                       | 4306 | C2 Fractionator Bottoms            |
| 4014 | Hydrogen from DA-302                     | 4307 | Ethane Recycle to EA-310           |
| 4016 | Ethane to DA-302                         | 4308 | Ethane Recycle to DA-302           |
| 4017 | Hydrogen to MAPD                         | 4309 | Ethane GA-404 Discharge            |
| 4018 | Hydrogen to DPG                          | 4311 | C2 Fractionator Reboiler Feed      |
| 4019 | Hydrogen to FF-301                       | 4312 | C2 Fractionator Draw-Off           |
| 4020 | Hydrogen from FF-301                     | 4313 | Draw Off To C2 Reflux Condenser    |
| 4021 | DA-302 Tower Bottoms                     | 4314 | Return from C2 Reflux Condenser    |
| 4022 | Hydrogen and Water from EA-304           | 4315 | Draw Off to Green Oil K.O. Drum    |
| 4139 | Hydrogen to EA-301                       | 4316 | Draw Off to Lower Side Reboiler    |
| 4729 | Hydrogen from EA-327X                    | 4317 | Return from Lower Side Reboiler    |
| 4351 | C2 Fractionator Overhead to EA-450       | 4318 | Vent Gas Recycle                   |
| 4352 | Ethylene Fractionator Condenser 2 Outlet | 4319 | Vent Gas After C.V.                |
| 4363 | Ethylene Fractionator Draw-Off to EA-653 | 4320 | Ethylene to Sub-cooling            |
| 4364 | EA-653 Return to Ethylene Fractionator   | 4321 | Ethylene to Tank                   |
| 4366 | Ethylene Fractionator Draw-Off to EA-449 | 4322 | C2 Product After Subcooled         |
| 4367 | EA-449 Return to Ethylene Fractionator   | 4323 | Liquid Ethylene Product to Storage |
| 4701 | Charge Gas from EA-328                   | 4324 | HP Ethylene GA-1803 Discharge      |
| 4702 | Charge Gas to EA-330                     | 4325 | Ethylene Liquid to EA-335X         |
| 4326 | Ethylene Liquid from EA-335X             |      |                                    |

### IV.3.3 Unit Operation

Codes list and description of the operating units involved in Stage 3 are summarized in Table IV.7.

**Table IV. 7. Process Equipment Used in Stage 3**

| <b>Name</b> | <b>Description</b>                         |
|-------------|--------------------------------------------|
| DA-301      | Demethanizer                               |
| EA-305      | Methane Refrigerant Compressor Intercooler |

**Simulation Report – ECC 860 KTA**  
**Working Stage 6**

---

|            |                                                        |
|------------|--------------------------------------------------------|
| EA-306     | Methane Refrigerant Compressor Intercooler             |
| EA-311     | Demethanizer Feed Chiller No. 1                        |
| EA-316     | Demethanizer Reboiler 1                                |
| EA-317     | Demethanizer Side Reboiler 1                           |
| EA-318X    | Methane Refrigerant Compressor Feed/Effluent Exchanger |
| EA-319     | Methane Refrigerant Chiller                            |
| EA-320     | Methane Refrigerant Condenser                          |
| EA-321     | Methane Refrigerant Compressor Min. Flow Cooler        |
| EA-336     | Demethanizer Reboiler 2                                |
| EA-337     | Demethanizer Side Reboiler 2                           |
| FA-307     | Demethanizer Reflux Drum                               |
| GA-301A,B  | Demethanizer Bottom Pump                               |
| DC-301     | Methanator                                             |
| DA-302     | Ethane Wash Tower                                      |
| EA-301A,B  | Methanator Feed/Effluent Exchanger                     |
| EA-302     | Methanator Feed Heater                                 |
| EA-303     | Methanator Effluent Cooler                             |
| EA-304     | Hydrogen Chiller                                       |
| FA-301     | Hydrogen Dryer K.O. Drum                               |
| FF-301A,B  | Hydrogen Dryers                                        |
| DA-401     | Deethanizer                                            |
| FA-402     | Deethanizer Reflux Drum                                |
| FA-401     | Green Oil K.O. Drum                                    |
| FF-401A,B  | Ethylene Dryer                                         |
| DC-401A    | Acetylene Converter 1                                  |
| DC-401B    | Acetylene Converter 2                                  |
| EA-401     | Deethanizer Reboiler 1                                 |
| EA-402     | Deethanizer Steam Reboiler                             |
| EA-403     | Deethanizer Condenser 1                                |
| EA-404A,B  | Acetylene Converter Feed/Effluent Exchanger            |
| EA-405     | Acetylene Converter Heater                             |
| EA-406A, B | Acetylene Converter Intercooler 1                      |
| EA-407     | Acetylene Converter Aftercooler                        |
| EA-441     | Deethanizer Reboiler 2                                 |
| EA-443     | Deethanizer Condenser 2                                |
| EA-447A, B | Acetylene Converter Intercooler 2                      |
| GA-401A,B  | Deethanizer Reflux Pump                                |
| GA-        | Green Oil Effluent Pump                                |

|             |                                       |
|-------------|---------------------------------------|
| 402A,B      |                                       |
| DA-402      | Ethylene Fractionator                 |
| EA-408      | Ethylene Fractionator Reboiler        |
| EA-409      | Ethylene Fractionator Side Reboiler 1 |
| EA-410      | Ethylene Fractionator Condenser 1     |
| EA-413      | HP Ethylene Steam Vaporizer           |
| EA-414      | Ethylene Product Subcooler            |
| EA-449      | Ethylene Fractionator Side Reboiler 2 |
| EA-450      | Ethylene Fractionator Condenser 1     |
| EA-603      | Ethylene Refrigerant Condenser 1      |
| EA-653      | Ethylene Refrigerant Condenser 2      |
| FA-403      | Ethylene Fractionator Reflux Drum     |
| GA-1803A,B  | Ethylene Product Pump                 |
| GA-1806A,B  | Ethylene Product Pump                 |
| GA-404A,B   | Ethane Wash Tower Feed Pump           |
| GA-405A,B,C | Ethylene Fractionator Reflux Pump     |

#### **IV.3.4 Simulation Approach and Assumption**

There are several assumption used in simulating the process with Aspen HYSYS, which are:

1. Reboiler EA-408 is integrated with DA-402 using the reboiled-stripper module in HYSYS.
2. Condenser section is not integrated due to the instability of DA-402 module with one additional degree of freedom.
3. There are two streams of NNF (Not Normally Function), which are NNF-1 and NNF-2. Mass flow's value of those two streams is set to 0 kg/h.
4. Reboiler EA-401 and EA-402 also EA-403 is integrated with DA-401 using the distillation module in HYSYS.
5. The three bed acetylene converter is simulated with three conversion reactors. The conversion of the first bed is 21% (ethylene product) and 23% (ethane product). The second bed conversion is 40% (ethylene product) and 40% (ethane product). The third bed conversion is 52% (ethylene product) and 48% (ethane product) These values are adjusted to match the design outcome.
6. Separation in FF-401 is simulated using component splitter
7. Separation in the hydrogen dryers (FF-301A,B) is simulated using a component splitter.
8. The methanation reaction is simulated using conversion reactor with total conversion is assumed to be 100% on CO basis.
9. A dummy energy steam is introduced to the conversion reactor to obtain the design

temperature outlet.

10. VLV-103 is added to meet the design's pressure demand, though in the PFD, there is no relieve valve shown before the stream 4001.
11. Reboiler EA-316 and EA-336 are integrated with the DA-301 tower with the reboiled-stripper unit in HYSYS and the energy steam is being input to the dummy EA-316 and EA-336 to calculate the 4178 flow temperature.
12. The heat exchanger EA-308X is splitted into three HE unit named EA-308X-1, EA-308X-2, and EA-308X-3 and trial and error is performed in the dummy flow temperature to obtain result as close as possible to the design.
13. The stream Dummy 11 is not connected to the mixer MIX-100 since it doesn't carry any materials but is able to give a significant error to the surrounding streams.

### IV.3.5 Simulation PFD

The simulation PFD is shown in .

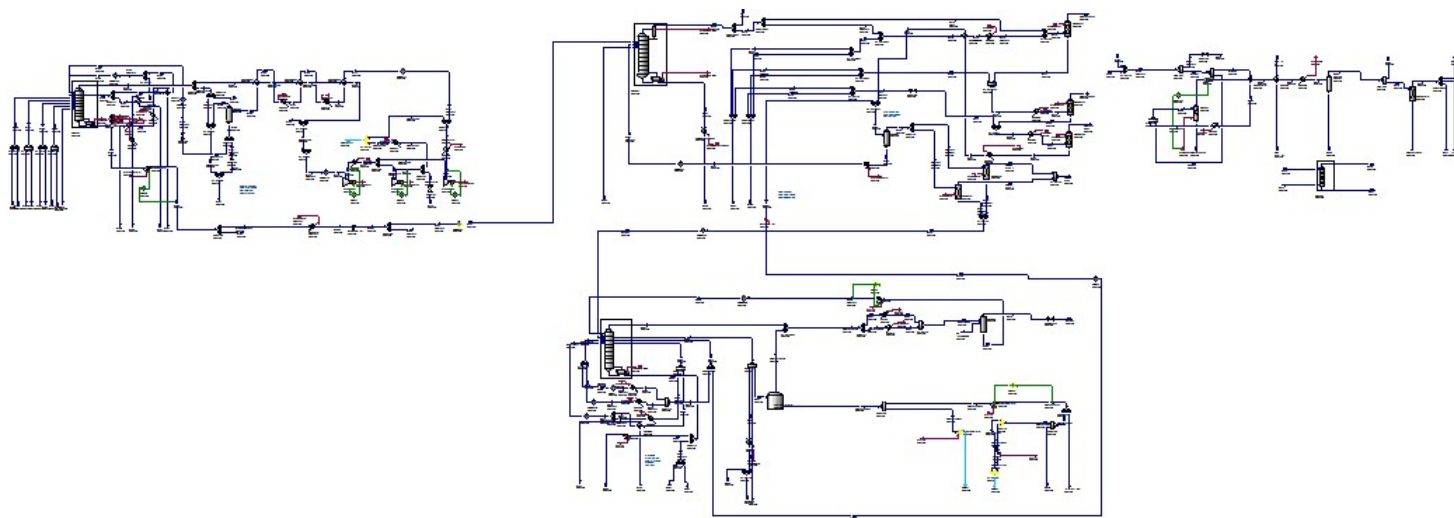

**Figure IV. 6 Simulation PFD of Stage 3 Integration**

### IV.3.6 Simulation Result and Evaluation

Result for integration stage is evaluated using design data compared to the streams data after the integration of stage 3. In the Stage 3, there are 4 units that already integrated into 1 file. The integration process uses cutter units to calculate the differences of fluid package and recycle units to recalculate streams using new data from other fluid package. The differences of fluid package can make error occur in the stream and unit operation such as columns, vessels, and reactors.

Stage 3 integration has less error compared to other stages because from the beginning, simulation of stage 3 already made in 1 file and already integrated in all streams. There are several error still occur after many revision and already accepted.

The error average of this simulation is approximately 0.06%, mainly contributed by molar flow variable. The error sprung by molar flow variable mainly caused by the error in composition. For flow 4021, temperature raises the error average from 0.15% (calculated without considering the temperature error) to 0.23%. This huge error in the 4021 flow simulation translated to approximately 0.6°C, a relatively small number. The difference between the simulation's result and the design is also caused by normalization done by HYSYS if the sum of compositions' percentage is not exactly 100%, like it happens in the design. There is also a quite significant error emerges on the flow 4167 because of the error happens on the previous stream, the overhead 4166 which draws mass flow less by around 76 kg/h. The small error from flow 4208 indicated that separation in DA-401 is performed adequately. The same can be seen in flow 4226 error in account for DC-401 reaction simulation. The error from temperature variable, though more than 0,01%, is negligible in the

simulation. The temperature error in the stream 4307 is actually 0,4°C, a relatively small error. The error from temperature of flow 4324 happens because the pump GA-1803 is not capable of forcing the stream's temperature any lower.

The most important unit in this simulation is DA-402. It has 4 inlet flows and 5 outlet flows, and three recycle routine which makes it a very unstable unit. To obtain good results, simulation is performed by first using one inlet flow and two outlet flows (top and bottom product). Bottom temperature is specified and perform a trial and error until it converges. Addition of inlet flow is done first, one by one and wait for each flow addition to reach convergence. After all the inlet flows are attached, start adding the side draw. The degree of freedom will increase one per side draw. Same as the prior, add the side draws one by one and wait first until it converged. After all the line is attached, evaluate the composition and operating condition and change the tray efficiency value to match the design specification. Only after the error is negligible, the recycle routine can be activated (also one by one) and the whole system is converged.

#### **IV.4 Simulation Integration Stage 4**

##### **IV.4.1 Process Description**

There are several section in the stage 4 including Depropanizer, C3 Hydrogenation, Propylene Fractionation, Propylene Fractionation No. 3, Debutanizer, and Propylene Refrigeration System.

The main process of Depropanizer is to separate C3 components from deethanizer bottom product and from the condensate of stripper bottom. Moreover Depropanizer also separate C4 from cracked gas. This separation is done by using two tower system operating at different pressure. Deethanizer bottom product that contain C3 fraction in a big quantity and the recycle stream from MAPD flash drum are fed to Depropanizer No.1.

In the C3 Hydrogenation unit, Methylacetylene Propadiene (MAPD) that are contained in C3 streams are selectively hidgrohenated into propane and propylene in one stage LB-fining reactor system. The PFD for MAPD converter unit is shown in Figure IV.7. This unit consists of an online reactor and a spare reactor. In this system, there is no regeneration reactor.

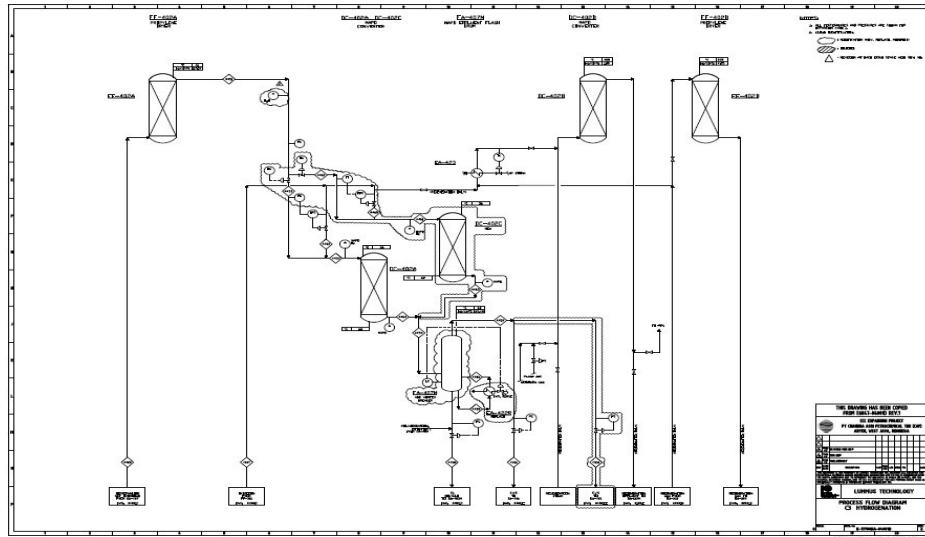

**Figure IV. 7. Simulation PFD of Depropanizer**

Propylene Fractionation No. 3 is used to eliminate propane from FA-407M. The column DA-415 operates at bottom temperature of 58°C and pressure 19.44 kg/cm<sup>2</sup>g while top pressure is 18.33 kg/cm<sup>2</sup> g and temperature 46°C. The propane will be removed in the bottom side of the column while a relatively low propane gas will be attained at the top of the column. Some of the distillate will be recycled back to the column as a reflux through separation in FA-424. Figure xx2 describes the process flow diagram of Propylene Fractionation No. 3.

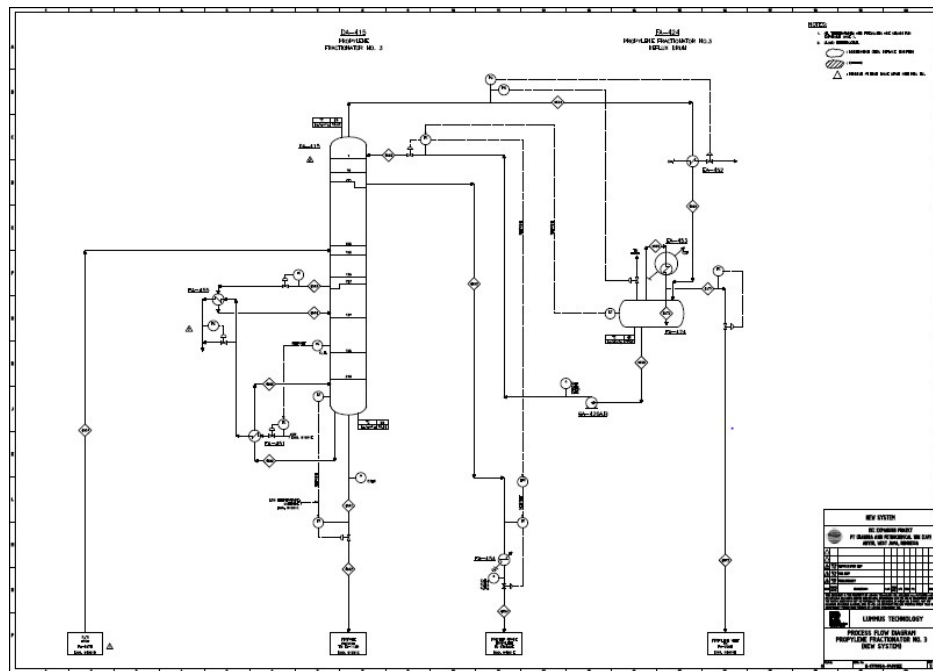

**Figure IV. 8. Simulation PFD of Propylene Fractionation No. 3**

Debutanizer's function is to separate the C4 compounds from other heavier components. Feed to debutanizer is depropanizer-2 bottom product. Debutanizer column equipped with cooling water condenser and reboiler with a low-pressure steam. Top products on debutanizer is a mixture of C4 which is then sent to a storage tank C4/C5. Bottom products combined

with gasoline from quench tower and MP gasoline flash drum as a makeup for untreated pyrolysis gasoline delivered to DPG unit. The PFD of Debutanizer unit are shown in the Figure IV.9.

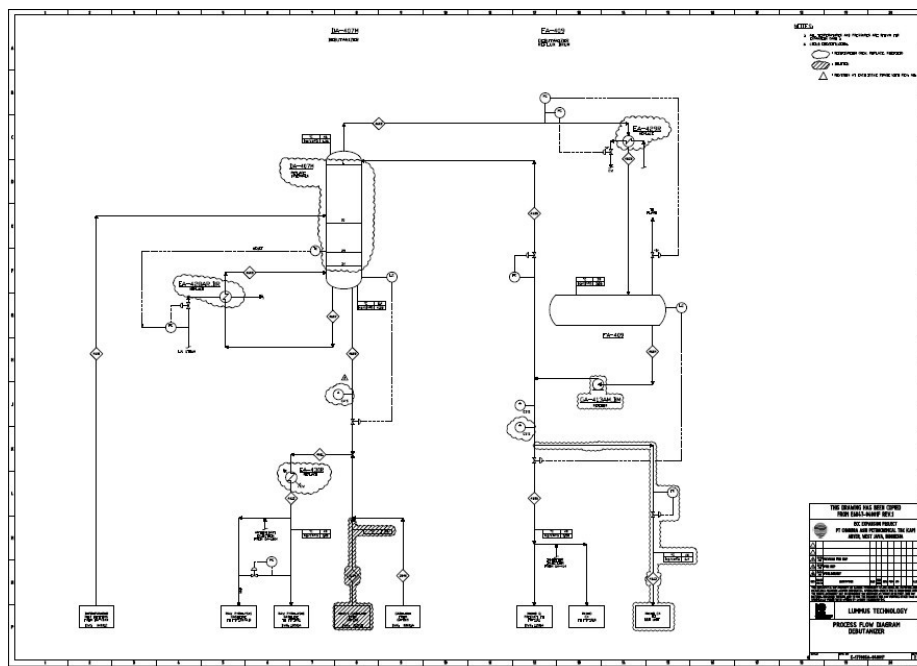

**Figure IV. 9. PFD of Debutanizer**

Propylene Refrigeration System in PT. Chandra Asri Petrochemical have 4 compression stage. Each compression stage operate with pressure 0,42; 4,11; 7,64; and 16,97 kg/cm<sup>2</sup> gauge. The cold fluid which is used to turn superheated propylene to saturated vapour are cooling water, deethanizer feed, offgas, and propylen product stream. After that, saturated vapour propylene is condensed to form saturated liquid. Then, this it's expanded to lower its temperature. It's expanded four times to make its temperature as low as 13; -6; -27; and -40°C. Vapour and liquid fraction from this expansion are separated by flash separator. Some fraction of vapor from flash separator is condensed and then evaporated, some other vapor is sent to compressor suction. Some liquid from flash separator is chilled and then expanded and some other are evaporated.

#### IV.4.2 Stream List

Stream list that exist in the stage 4 listed in the Table IV.8.

**Table IV. 8. Stage 4 Stream List**

| Code | Description                                                   |
|------|---------------------------------------------------------------|
| 4208 | Deethanizer bottoms from DA-401                               |
| 4458 | Recycle from FA-407                                           |
| 4408 | Depropanizer net overhead to FF-402A/B<br>(Unnamed 5 split 2) |



**Simulation Report – ECC 860 KTA**  
**Working Stage 6**

---

|        |                                                                   |
|--------|-------------------------------------------------------------------|
| 4409   | Depropanizer bottoms to EA-421                                    |
| 4410   | Depropanizer bottoms from EA-421 to DA-404                        |
| 4411   | Depropanizer bottoms from EA-421 to DA-404<br>after control valve |
| 3206   | Condensate Stripper Bottoms from EA-212                           |
| 4413   | 3206 + Polymerization inhibitor from PA-402                       |
| 4422   | DA-404 overhead to EA 421R in Shell Side                          |
| 4423   | DA-404 overhead from EA-421R to DA-403                            |
| 4414   | Depropanizer No.2 Bottoms to DA-407                               |
| 4601   | Feed to Debutanizer                                               |
| 4017   | Hydrogen to MAPD Converter                                        |
| 4408   | FF-402 inlet                                                      |
| 4451   | FF-402 outlet                                                     |
| 4452   | Hydrogen to DC-402 A                                              |
| 4453   | DC-402A inlet                                                     |
| 4454   | FA-407M inlet                                                     |
| 4455   | EA-422R inlet                                                     |
| 4456   | EA-422R outlet                                                    |
| 4457   | FA-407M vapor                                                     |
| 4458   | C3 recycle to DA-403M                                             |
| 4459   | C3 feed to DC-402A                                                |
| 4460   | Hydrogen to DC-402C                                               |
| 4461   | DC-402C inlet                                                     |
| 4462   | C3 feed to DC-402C                                                |
| 4463   | DC-402C outlet                                                    |
| 4464   | DC-402A outlet                                                    |
| 4501   | Feed to DA-406                                                    |
| 4551   | Feed to DA-415                                                    |
| 4501   | C3's from FA-407                                                  |
| 4502   | Polymer Grade Propylene                                           |
| 4503   | Propylene Product to Battery Limit                                |
| 4504   | DA-406 Gross Overhead                                             |
| 4505   | Effluent from EA-426                                              |
| 4505,1 | Vapour Part of 4505                                               |
| 4505,2 | Liquid Part of 4505                                               |
| 4506   | Reflux to GA-411                                                  |
| 4507   | Discharge from GA-411                                             |
| 4508   | Reflux to DA-406                                                  |

**Simulation Report – ECC 860 KTA**  
**Working Stage 6**

---

|        |                                     |
|--------|-------------------------------------|
| 4509   | EA-424 Feed                         |
| 4510   | Effluent from EA-424                |
| 4510,1 | Vapour Part of 4510                 |
| 4510,2 | Liquid Part of 4510                 |
| 4511   | C3 Fractionator No. 1 Bottoms       |
| 4512   | Propane Recycle after Control Valve |
| 4512,1 | Vapour Part of 4512                 |
| 4512,2 | Liquid Part of 4512                 |
| 4513   | EA-425 Feed                         |
| 4514   | Effluent from EA-425                |
| 4514,1 | Vapour Part of 4514                 |
| 4514,2 | Liquid Part of 4514                 |
| 4515   | Flash Drum Vapour to Vent Condenser |
| 4518   | DA-406 Net Bottoms                  |
| 4519   | Reflux Pump Discharge               |
| 4520   | DA-405 Gross Overhead               |
| 4521   | C3-Vent Gas from EA-427             |
| 4522   | C3-Vent Gas to FA-205               |
| 4523   | C3-Liquid from Vent Condenser       |
| 4551   | Feed to DA-415                      |
| 4552   | DA-415 distillate product           |
| 4553   | Propylene product EA-454 out        |
| 4554   | DA-415 gross overhead               |
| 4555   | EA-452 outlet                       |
| 4556   | FA-424 liquid outlet                |
| 4558   | DA-415 reflux                       |
| 4559   | EA-451 inlet                        |
| 4560   | EA-451 outlet                       |
| 4561   | DA-415 bottoms                      |
| 4562   | DA-415 propane recycle              |
| 4563   | EA-455 inlet                        |
| 4564   | EA-455 outlet                       |
| 4565   | EA-453 inlet                        |
| 4571   | EA-453 outlet                       |
| 4601   | Feed to DA-407                      |
| 4602   | DA-407 Gross Overhead               |
| 4603   | EA-429 Effluent                     |
| 4604   | FA-409 Liquid                       |

**Simulation Report – ECC 860 KTA**  
**Working Stage 6**

---

|      |                            |
|------|----------------------------|
| 4605 | Reflux to DA-407           |
| 4606 | Mixed C4 Product           |
| 4607 | EA-428 Inlet               |
| 4608 | EA-428 Outlet              |
| 4609 | DA-407 Bottoms             |
| 4611 | Total Gasoline Product     |
| 4612 | Cooled Gasoline Product    |
| 4613 | Raw Mixed C4 to BDE Unit   |
| 5001 | Vapor to STG 1 (GB-501)    |
| 5002 | Vapor to STG 2 (GB-501)    |
| 5003 | Vapor fr STG 1 (GB-501)    |
| 5004 | Vapor to STG 4 (GB-501)    |
| 5005 | GB-501 Discharge           |
| 5006 | EA-501 Outlet              |
| 5007 | FA-505 Outlet              |
| 5008 | To Liq Aft Recu to STG 4   |
| 5009 | Liq to STG 4 Loads         |
| 5010 | Bypass liq to FA-504       |
| 5011 | Bypass Liq to STG 4 D/S CV |
| 5012 | Feed to EA-420             |
| 5013 | Feed to EA-420 D/S CV      |
| 5014 | EA-420 Outlet              |
| 5015 | C3R to 207, 304, 427, 602  |
| 5016 | Feed to EA-207             |
| 5017 | Feed to EA-207 D/S CV      |
| 5018 | EA-207 Outlet              |
| 5019 | C3R to EA-304 & EA-602     |
| 5020 | Feed to EA-602             |
| 5021 | Feed to EA-602 D/S CV      |
| 5022 | EA-602 Outlet              |
| 5023 | Feed to EA-304             |
| 5024 | Feed to EA-304 D/S CV      |
| 5025 | EA-304 Outlet              |
| 5026 | Total Vapor to FA-504      |
| 5027 | Liq fr FA-504              |
| 5028 | Liq fr FA-504 Aft Recu     |
| 5029 | By liq. To STG 3 D/S CV    |
| 5030 | Tot Vap from FA-504        |

#### **IV.4.3 Unit Operation**

Unit operations which involved in Stage 4 are listed in the Table IV.9.

**Table IV. 9. Unit Operation in Stage 4**

| <b>Code</b> | <b>Description</b>                       |
|-------------|------------------------------------------|
| DA-403      | Depropanizer No. 1                       |
| DA-404      | Depropanizer No. 2                       |
| EA-421      | HE bottom 1 – overhead 2                 |
| GA-407A/B   | Pump after FA-404                        |
| GA-408A/B   | Pump                                     |
| FF-402A/B   | Propylene Dryer                          |
| DC-402 A/C  | MAPD Converter                           |
| FA-407M     | MAPD Effluent Flash Drum                 |
| DA-405      | Propylene Fractionator No. 1             |
| DA-406      | Propylene Fractionator No. 2             |
| EA-424      | Propylene Fractionator No. 1 Reboiler    |
| EA-425      | Propylene Fractionator No. 2 Reboiler    |
| EA-426A,B   | Propylene Fractionator Condenser         |
| EA-427      | Propylene Fractionator Vent Condenser    |
| EA-431      | Propylene Product Cooler                 |
| EA-432      | Propylene Product Subcooler No. 1        |
| EA-433      | Propylene Product Subcooler No. 2        |
| FA-408      | Propylene Fractionator Reflux Drum       |
| GA-410      | Propylene Fractionator No. 1 Reflux Pump |
| GA-411A,B   | Propylene Fractionator No. 2 Reflux Pump |
| DA-415      | Propylene fractionator No.3              |
| FA-424      | Propylene fractionator No.3 reflux drum  |
| EA-451      | Propylene fractionator No.3 reboiler     |
| EA-452      | Propylene fractionator No.3 condenser    |
| EA-453      | Heat Exchanger                           |
| EA-454      | Heat Exchanger                           |
| EA-455      | Heat Exchanger                           |
| GA-426 A,B  | Pump                                     |
| DA-407      | Tray Column                              |
| FA-409      | Reflux Drum                              |
| EA-428A.B   | Heat Exchanger                           |
| EA-429      | Heat Exchanger                           |
| EA-430      | Heat Exchanger                           |

|           |                                                            |
|-----------|------------------------------------------------------------|
| GA-413A.B | Pump                                                       |
| FA-410    | Liquid Propylene Accumulator for EA-408                    |
| FA-411    | Liquid Propylene Accumulator for EA-411                    |
| FA-412    | Liquid Propylene Accumulator for EA-412                    |
| FA-501    | Propylene Refrigerant Compressor 1st Stage<br>Suction Drum |
| FA-502    | Propylene Refrigerant Compressor 2nd Stage<br>Suction Drum |
| FA-503    | Propylene Refrigerant Compressor 3rd Stage<br>Suction Drum |
| FA-504    | Propylene Refrigerant Compressor 4th Stage<br>Suction Drum |
| FA-505    | Propylene Refrigerant Accumulator                          |
| GB-501    | Propylene Refrigerant Compressor                           |

#### **IV.4.4 Simulation Approach and Assumption**

Simulation of the stage 4 is the integration of the simulation of each section including C3 Hydrogenation, Debutanizer, Propylene Refrigeration, Propylene Fractionation No.3, Propylene Fractionation and Depropanization.

The assumptions and approaches made in this simulation are:

- a. The fluid package used in the Depropanizer is Peng-Robinson.
- b. Components, operation conditions, and composition streams are simulated based on Basic Engineering Case 1 according to the information in PFD .
- c. Design column data used as calculation basis. In addition, column efficiency used is depend on the product that is wanted.
- d. Fluid package that is used in C3 Hydrogenation unit is Peng-Robinson because the simulation involved hydrocarbon components.
- e. Influent and effluent in FF-402A unit are assumed in the same condition and component because the design data are not given.
- f. SRK-Twu is used as fluid package in the Propylene Fractionation unit because the simulation involve hydrocarbon components. This fluid package also common used for simulation in petrochemical industry. The fluid package uses Soave-Redlich-Kwong property package with Twu Equation of State Alpha Function for improved vapour pressure prediction.
- g. Stream 4501 inputted by design data and has properties comparable with designed data. All of these streams are fed to tray No. 134 and 104 DA-406.
- h. SRK is used as fluid package in the Propylene Fractionation No. 3 unit because the simulation involve hydrocarbon components. This fluid package also common used for simulation in petrochemical industry.

- i. Stream 4551 input by design data and has properties comparable with designed data.
- j. The fluid package used in the Debutanizer unit is Wilson-Ideal. The Wilson property package is used for chemical systems with highly non-ideal chemicals. It uses ideal gas equation for vapour calculation.
- k. Butadiene/C4Acetylene represented by 1,3-Butadiene.
- l. Butylenes represented by 1-Butene.
- m. C6-C8 non aromatics component represented by 1-Hexyne, n-Heptane, dan n-Octane.
- n. Fluid package which is used in the Propylene Refrigeration System is UNIQUAC-Ideal.
- o. The second and fourth compressor adiabatic efficiency is adjusted to get the right temperature (using “adjust” tool in hysys).
- p. Energy balances in FA-502 and FA-503 separator is adjusted to get the right mass flow for vapor and liquid fraction
- q. Regeneration stream is not simulated

#### **IV.4.5 Simulation PFD**

The simulation PFD of stage 5 are shown in the Figure IV.10.

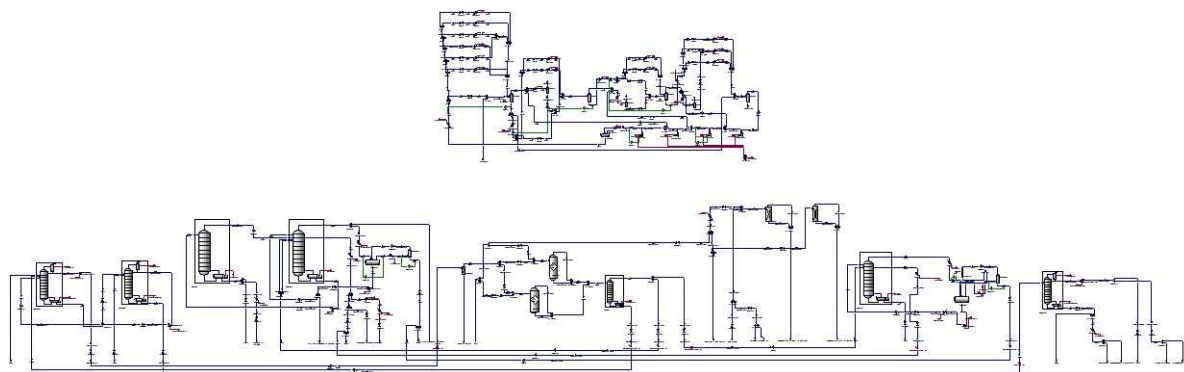

**Figure IV. 10. Simulation PFD of Stage 4**

#### **IV.4.6 Simulation Result and Evaluation**

Convergence has been achieved in the integration simulation. Result for integration stage is evaluated using design versus data from streams after integration. In the Stage 4, there are 6 units that already integrated into a single simulation. The integration process uses cutter units to calculate the differences of fluid package and recycle units to recalculate streams using new data from other fluid package. The differences of fluid package can make error occur in the stream and unit operation such as columns, vessels, and reactors.

Stage 4 integration will be discussed into 2 part, there are profil temperature discussion and mass balance discussion. Figure IV.11 below show the evaluation in profil temperature between the units data compare to the integration data.

# Simulation Report – ECC 860 KTA

## Working Stage 6

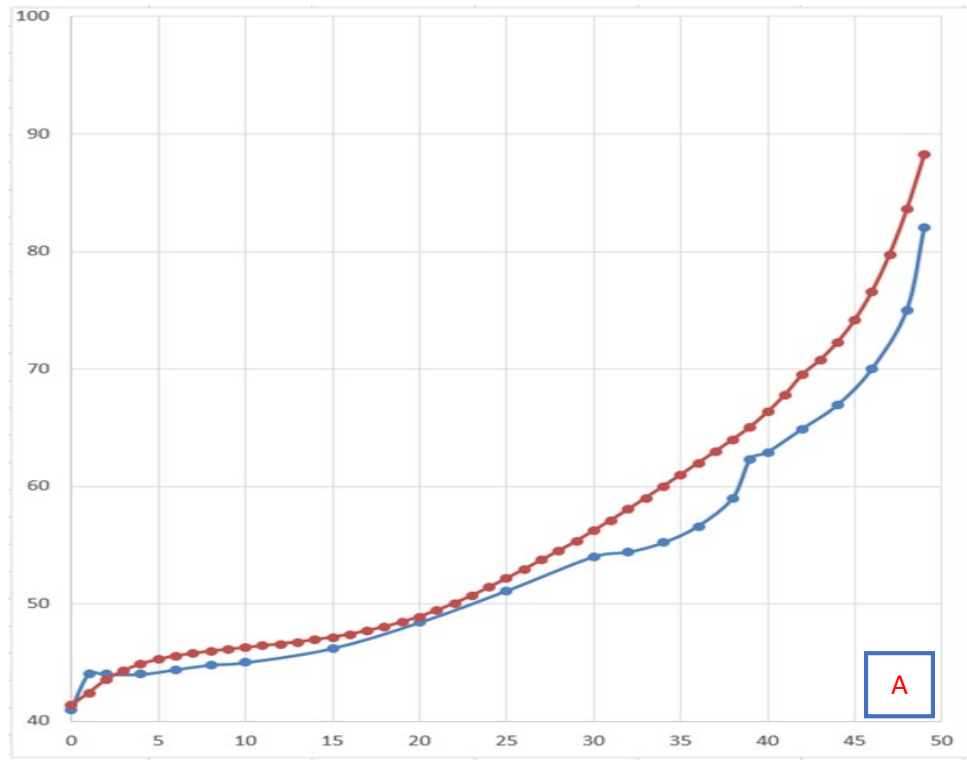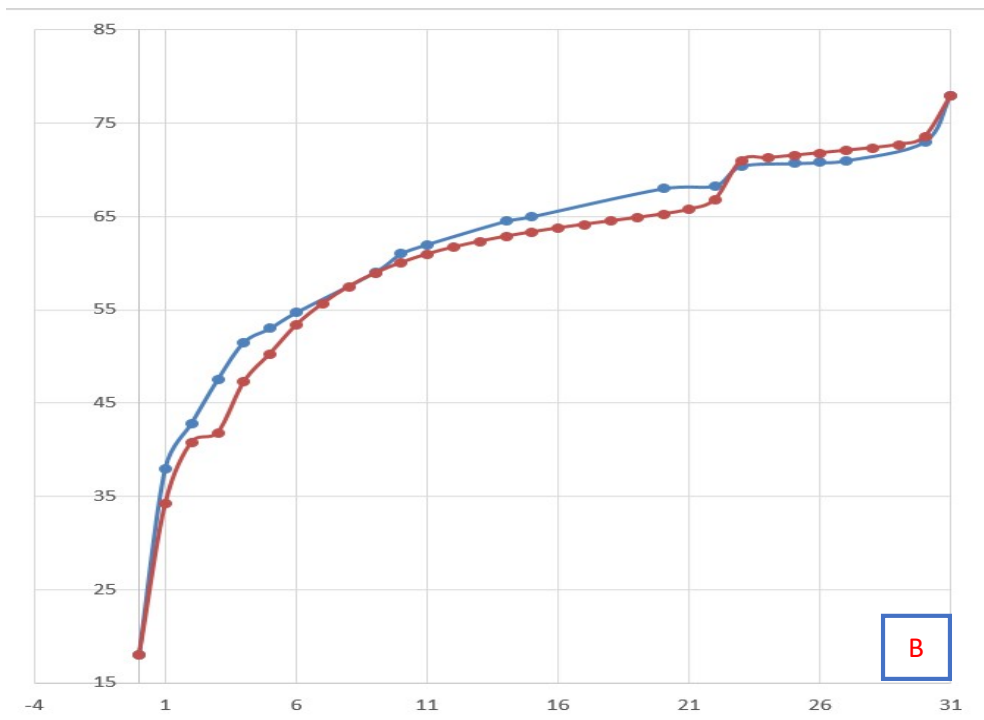

## Simulation Report – ECC 860 KTA

### Working Stage 6

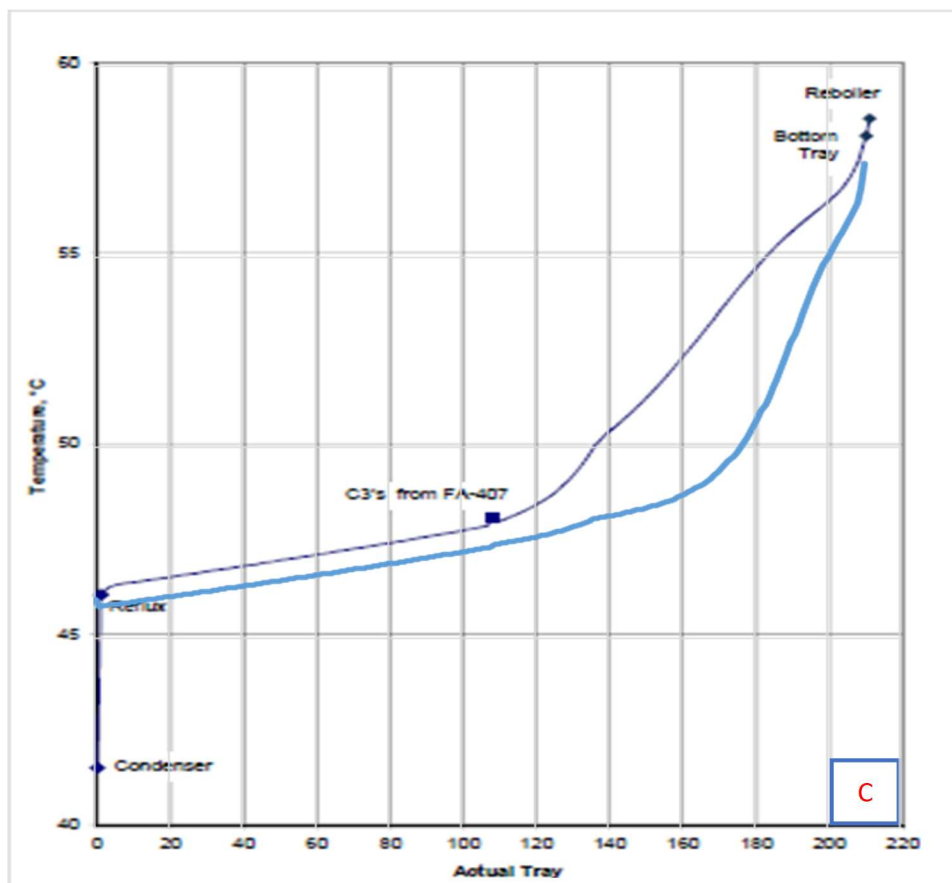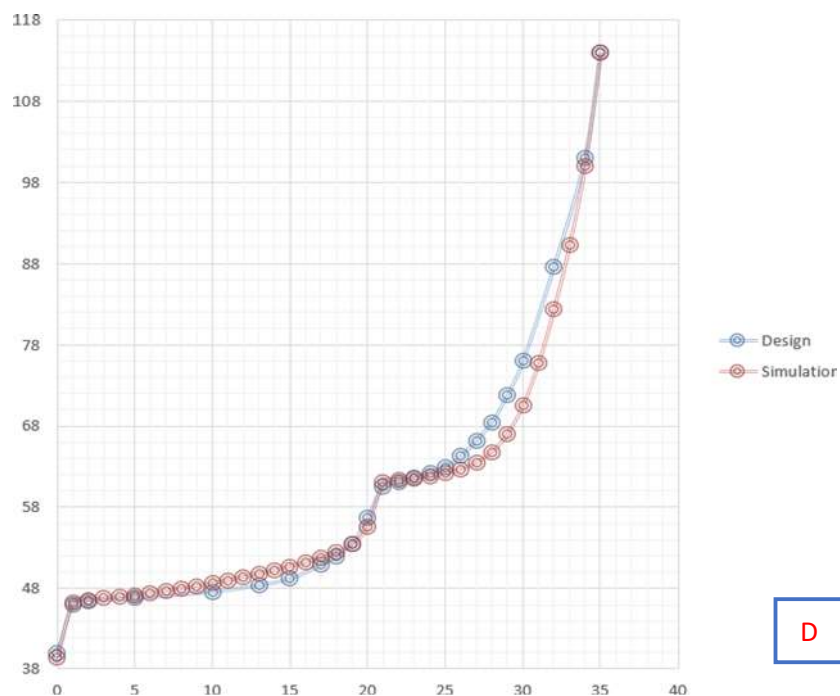



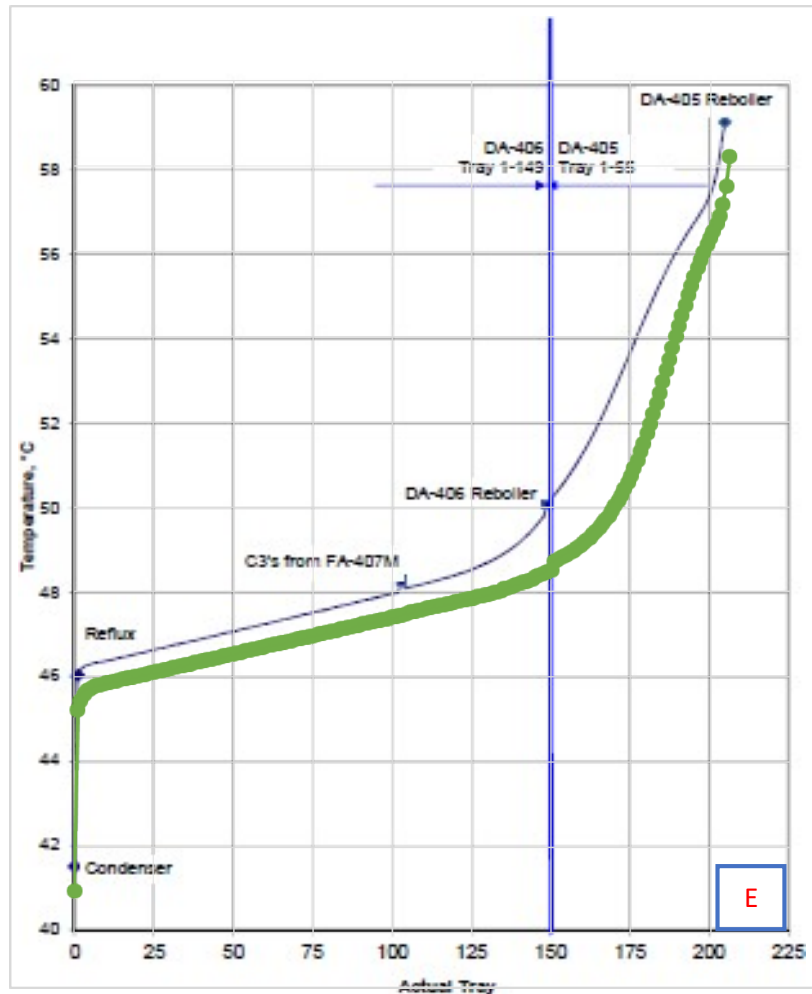

**Figure IV. 11. Profil Temperature of DA-403M (A), DA-404M (B), DA-415M (C), DA-407M (D), DA-405 and DA-406 (E)**

Overall, there are slight differences of stage temperature between design and integration data. The significant difference occurs in the unit DA-415M. The difference reached 3 °C at its highest gap.

For mass balance evaluation, there are several streams that change compared to design data including stream 4561, stream 4423, stream 4422, stream 4413, and stream 3206 with the number of error are 5.84%, 0.09%, 0.20%, 0.10%, and 0.11%, respectively. However, these changes will not affect the simulation. Overall the integration process force the simulation reach the design data and has less error compared to individual unit simulation.

## **IV.5 Simulation Integration Stage 5**

### **IV.5.1 Process Description**

There are several section in the stage 5 including Ethylene Refrigeration Section, Enhanced Binary Refrigeration (EBR) Section, C<sub>4</sub>/C<sub>5</sub> Hydrogenation Section, Pyrolysis Gasoline Hydrogenation Section, and Pyrolysis Gasoline Hydrogenation Fractionation Section.

The Ethylene Refrigeration provides three levels of refrigeration at the operating temperature of -101°C, -75°C, and -63°C. This closed loop system was utilized by steam turbine to drive the centrifugal compressor. The compressor discharge vapors are cooled first against cooling water and partially de-superheated against propylene refrigerant. The discharge is further de-superheated and condensed by providing side re-boil heat to the ethylene fractionator. Refrigeration is recuperated by sub-cooling the liquid refrigerant from the accumulation against off-gases, de-ethanizer feed, and ethylene product in the chilling train.

The C<sub>4</sub>/C<sub>5</sub> feedstock stream flows from storage to the surge drum and it is separated by gravity if the water exist in the stream. From the surge drum, the C<sub>4</sub>/C<sub>5</sub> is pumped to the reactor and it is mixed with the bulk of the makeup hydrogen and a recycle of liquid which has been almost completely reacted. The mixture is then heated by heat exchanger using vapor that produced from the reactor between the catalyst beds. The mixed phase passes downward through the top of catalyst bed so the unsaturated feed is hydrogenated by the hydrogen makeup from the bottom of reactor. The hydrogen that is not converted in the catalyst bed leaving on the top of reactor joining the vapor phase of mixed phase feed. The reaction on the reactor is exothermic so the temperature of hydrogen leaving the reactor is high. The vapor passing from reactor preheats the reactor feed and is then further cooled and condensed in a water-cooled exchanger. Effluent from the condenser passes to the high pressure flash drum where liquid recycle is separated and returned to be mixed with fresh feed to the reactor. High pressure flash vapor passes through a refrigerated vent condenser before being returned to the ethylene unit for recovery. Liquid from the bottom of the reactor is cooled to 38°C in a water-cooled exchanger. The cooled product is sent to cracking heaters in the ethylene unit via C<sub>4</sub>/C<sub>5</sub> storage system.

The pyrolysis gasoline hydrogenation operates in the high temperature reactor to maintain the product quality. When end-of-run conditions are reached, the catalyst is regenerated in-situ with steam and air. Vapor liquid separation takes place in the bottom of the reactor. Liquid flow from the reactor is split into two streams. One stream is in total recycle. It is pumped and divided, as a portion passes under reactor inlet temperature control through the reactor cooler forming the cold recycle. The remaining hot recycle liquid bypasses the recycle cooler under total recycle flow control. The two recycle streams along with the fresh feed pass to the reactor inlet as previously described. The other liquid stream from the reactor is the net first stage liquid product. It is cooled and routed under level control to the high pressure flash drum.

Hydrogen-rich vapor leaving the separation section of the reactor is cooled and partially condensed in the vapor condenser. The two-phase stream leaving the condenser is sent to the

high pressure flash drum together with cooled reactor liquid product. Vapor from the high pressure flash drum is returned to the ethylene unit for hydrogen recovery. Liquid from this drum flows to the low pressure flash drum. Vapor from the low pressure flash drum is also returned to the ethylene unit for hydrogen recovery and the liquid feeds the de-pentanizer.

Partially hydrogenated gasoline, from the reactor, is charged to the de-pentanizer where C<sub>5</sub> and any residual gases are removed as overhead products. The C<sub>5</sub> product from the de-pentanizer reflux drum is pumped to the C<sub>4</sub>/C<sub>5</sub> hydrogenation via the raw C<sub>4</sub>/C<sub>5</sub> storage and/or to fuel storage. Any water contained in the feed is taken overhead and withdrawn from a boot on the reflux drum. Re-boiling is by medium pressure steam and overhead condensing is by cooling water. The bottoms product from the de-pentanizer is charged to the BTX tower where C<sub>9</sub> and heavier compounds are removed as a bottom product, cooled, and sent to storage. The overhead product is sent to battery limits. In case the reactor is regenerated, the overhead product from BTX tower shall be sent to the storage tank. The BTX tower is operated at sub-atmospheric pressure to minimize fouling in the bottom section caused by high temperature. Re-boiling is by medium pressure steam. Overhead condensing is by cooling water and a refrigerated vent condenser is provided to minimize hydrocarbon carryover to the vacuum system.

#### **IV.5.2 Stream List**

Stream list that exist in the stage 5 listed in the Table IV.10.

**Table IV. 10. The Stream List of Stage 5**

| <b>Name</b> | <b>Description</b>                  | <b>Name</b> | <b>Description</b>                     |
|-------------|-------------------------------------|-------------|----------------------------------------|
| 5101        | Vapor from FA-601                   | 1103        | H <sub>2</sub> to Top Bed              |
| 5102        | Vapor rom FA-602                    | 1104        | H <sub>2</sub> to Bottom Bed           |
| 5103        | Vapor from FA-603                   | 1105        | FDS + Recycle                          |
| 5104        | GB-601 Discharge                    | 1106        | Reactor FD Liquid                      |
| 5105        | EA-601 Outlet                       | 1107        | Reactor Vapor Effluent                 |
| 5106        | EA-602 Outlet                       | 1108        | EA-1101S Outlet                        |
| 5107        | EA-603 Outlet                       | 1109        | EA-1102S Outlet                        |
| 5108        | FA-604 Outlet                       | 1110        | HPFL Off Gas                           |
| 5109        | Liquid to 3rd Stage Loads           | 1111        | Reactor Liquid Effluent                |
| 5110        | Feed to EA-311                      | 1112        | HPFL Recycle                           |
| 5111        | Feed to EA-311 D/S CV               | 1113        | EA-1104S Outlet                        |
| 5112        | Liquid from FA-603                  | 1114        | C <sub>4</sub> -C <sub>5</sub> Product |
| 5113        | Sub-cooled Liquid to 2nd Stage      | 1201        | Hydrogen feed to DC-1201               |
| 5114        | Sub-cooled Liquid to Stage 2 D/S CV | 1202        | Liquid Feed to DC-1201                 |
| 5115        | Feed to EA-312                      | 1203        | Vapor from DC-1201                     |
| 5116        | EA-312 Outlet                       | 1204        | Liquid from DC-1201                    |

**Simulation Report – ECC 860 KTA**  
**Working Stage 6**

|      |                                 |      |                             |
|------|---------------------------------|------|-----------------------------|
| 5117 | Bypass Liquid to 2nd Stage      | 1205 | Recycle to DC-1201          |
| 5118 | Bypass Liquid to Stage 2 D/S CV | 1206 | Net Liquid from DC-1201     |
| 5119 | Liquid from FA-602              | 1207 | EA-1201 Effluent to FA-1203 |
| 5120 | Feed to EA-320                  | 1208 | FA-1203 Feed                |
| 5121 | Feed to EA-315                  | 1209 | FA-1203 Liquid to FA-1209   |
| 5122 | Feed to EA-320 D/S CV           | 1210 | Off-gas from FA-1203        |
| 5123 | EA-320 Outlet                   | 1211 | Off-gas from FA-1209        |
| 5124 | Feed to EA-315 D/S CV           | 1212 | FA-1209 Liquid to DA-1202   |
| 5125 | EA-315 Outlet                   | 4612 | Cooled Gasoline Product     |
| 5126 | Total Vapor to FA-601           | 1216 | EA-1208 Effluent to FA-1206 |
| 5127 | Feed to EA-312 D/S CV           | 1217 | DA-1202 Reflux              |
| 5128 | Feed to EA-319                  | 1218 | Off-gas from FA-1206        |
| 5129 | Feed to EA-319 D/S CV           | 1219 | Total C5 Product            |
| 5130 | EA-319 Outlet                   | 1220 | DA-1202 Liquid to DA-1203   |
| 5131 | EA-311 Outlet                   | 1221 | DA-1203 Feed                |
| 5132 | Total Vapor to FA-603           | 1222 | DA-1203 Liquid to EA-1209   |
| 5133 | Bypass Liquid to 1st Stage      | 1223 | EA-1209 Effluent to DA-1203 |
| 5134 | Bypass Liquid to Stage 1 D/S CV | 1224 | DA-1203 Vapor to EA-1210    |
| 5135 | Feed to EA-414 1st Stage        | 1225 | EA-1210 Liquid to DA-1207   |
| 5136 | EA-414 Outlet to Stage 1        | 1226 | DA-1203 Reflux              |
| 5137 | Feed to EA-414 2nd Stage        | 1227 | C6/C8 Gasoline to Storage   |
| 5138 | EA-414 Outlet to Stage 2        | 1228 | C9+ Product to EA-1212      |
| 5139 | Bypass Liquid to FA-603         | 1229 | C9+ Product to Storage      |
| 5140 | Bypass Liquid to Stage 3 D/S CV | 1230 | Off-gas to FA-201           |
| 5141 | Feed to EA-414 3rd Stage        | 1231 | C5 Product to Storage       |
| 5142 | EA-414 Outlet 3rd Stage         | 1232 | C5 Product to FA-1101       |
| 1101 | C4 Feed                         | 1233 | DA-1202 Feed                |
| 1102 | H2 Feed                         |      |                             |

### IV.5.3 Unit Operation

Unit operations which involved in Stage 5 are listed in the Table IV.11.

**Table IV. 11. Unit Operation in Stage 5**

| <b>Name</b> | <b>Description</b>                         |
|-------------|--------------------------------------------|
| FA-601      | Ethylene Compressor 1st Stage Suction Drum |
| EA-307X     | Off Gas Exchanger No.3 (PA-301)            |
| EA-311      | Demethanizer Feed Chiller No. 2            |

**Simulation Report – ECC 860 KTA**  
**Working Stage 6**

---

|            |                                            |
|------------|--------------------------------------------|
| EA-312     | Demethanizer Feed Chiller No. 3            |
| EA-315     | Demethanizer Feed Chiller No. 4            |
| EA-319     | Methane Refrigerant Chiller                |
| EA-320     | Methane Refrigerant Condenser              |
| EA-414     | Ethylene Product Sub-cooler                |
| EA-601     | Ethylene Refrigerant Cooler                |
| EA-602     | Ethylene Refrigerant Desuperheater         |
| EA-603     | Ethylene Refrigerant Condenser             |
| FA-602     | Ethylene Compressor 2nd Stage Suction Drum |
| FA-603     | Ethylene Compressor 3rd Stage Suction Drum |
| FA-604     | Ethylene Refrigerant Accumulator           |
| FA-605     | Blowcase for FA-601                        |
| GB-601     | Ethylene Refrigerant Compressor            |
| DC-1101    | C4/C5 Hydrogenation Reactor                |
| EA-1101    | Reactor Feed/Effluent Exchanger            |
| EA-1102    | Reactor Effluent Condenser                 |
| EA-1103    | HP Flash Vent Condenser                    |
| EA-1104    | C4/C5 Product Cooler                       |
| EA-1105    | Preheater (For start-up)                   |
| FA-1101    | C4/C5 Feed Surge Drum                      |
| FA-1102    | HP Flash Drum                              |
| GA-1101A,B | C4/C5 Feed Pump                            |
| GA-1102A,B | HP Flash Recycle Pump                      |
| GA-1103A,B | Reactor Bottoms Pump                       |
| 1201       | Hydrogen feed to DC-1201                   |
| 1202       | Liquid Feed to DC-1201                     |
| 1203       | Vapor from DC-1201                         |
| 1204       | Liquid from DC-1201                        |
| 1205       | Recycle to DC-1201                         |
| 1206       | Net Liquid from DC-1201                    |
| 1207       | EA-1201 Effluent to FA-1203                |
| 1208       | FA-1203 Feed                               |
| 1209       | FA-1203 Liquid to FA-1209                  |
| 1210       | Off-gas from FA-1203                       |
| 1211       | Off-gas from FA-1209                       |
| 1212       | FA-1209 Liquid to DA-1202                  |
| 4612       | Cooled Gasoline Product                    |
| DA-1202    | Depentanizer                               |

|            |                          |
|------------|--------------------------|
| DA-1203    | BTX Tower                |
| EA-1207    | Depentanizer Reboiler    |
| EA-1208    | Depentanizer Condenser   |
| EA-1209    | BTX Tower Reboiler       |
| EA-1210    | BTX Tower Condenser      |
| EA-1211    | BTX Tower Vent Condenser |
| EA-1212    | C9+ Product Cooler       |
| FA-1206    | Depentanizer Reflux Drum |
| FA-1207    | BTX Tower Reflux Drum    |
| FA-1208    | Ejector Hot Well         |
| GA-1205A,B | Depentanizer Reflux Pump |
| GA-1207A,B | C9 Product Pump          |
| GA-1209A,B | Ejector Hot Well Pump    |
| PA-1202    | BTX Tower Ejector System |

#### **IV.5.4 Simulation Approach and Assumption**

Simulation of the stage 5 is the integration of the simulation of each section including Ethylene Refrigeration Section, Enhanced Binary Refrigeration (EBR) Section, C<sub>4</sub>/C<sub>5</sub> Hydrogenation Section, Pyrolysis Gasoline Hydrogenation Section, and Pyrolysis Gasoline Hydrogenation Fractionation Section.

The fluid package using in the Ethylene Refrigeration Section is Peng-Robinson with the ethylene is the only one component used in this simulation. The process is assumed to be perfectly closed so there will no need for make-up refrigerant. There is also a slight deviation between the boiling point of ethylene from design data and HYSYS calculation. The HYSYS calculated boiling point will be used.

The fluid package using in the EBR Section is Peng-Robinson and the simulation is constructed using HYSYS Databanks. The assumptions applied in the simulation are the process is assumed to be perfectly closed (no refrigerant make-up) and the boiling point data being used is taken from HYSYS calculation.

The simulation of C<sub>4</sub>/C<sub>5</sub> hydrogenation section is constructed using Peng-Robinson fluid package and HYSYS Databanks. Three components are being used to simulate the C<sub>6</sub>-C<sub>8</sub> non-aromatics. The two-bed reactor in this section is simulated using two conversion reactor named DC-1101-1 and DC-1101-2 to accommodate the additional feed and side draw between the beds. The flash drum (FA-1102) on the reactor downstream is integrated with a heat exchanger (EA-1102). To simulate this unit, one cooler and component splitter is being used with the component split is calculated from design data.

The fluid packaged using in the Pyrolysis Gasoline Hydrogenation section and Pyrolysis Gasoline Hydrogenation Fractionation section are Peng Robinson because the simulation

involve hydrocarbon components. The fluid package also common used for simulation in petrochemical industry.

To build the simulation integration of stage 5, every single stream that connected between two unit in the stage 5 is united through recycle and because of the difference component used in every section, the stream are connected using cutter.

#### **IV.5.5 Simulation PFD**

The simulation PFD of stage 5 are shown on the figure xx9.

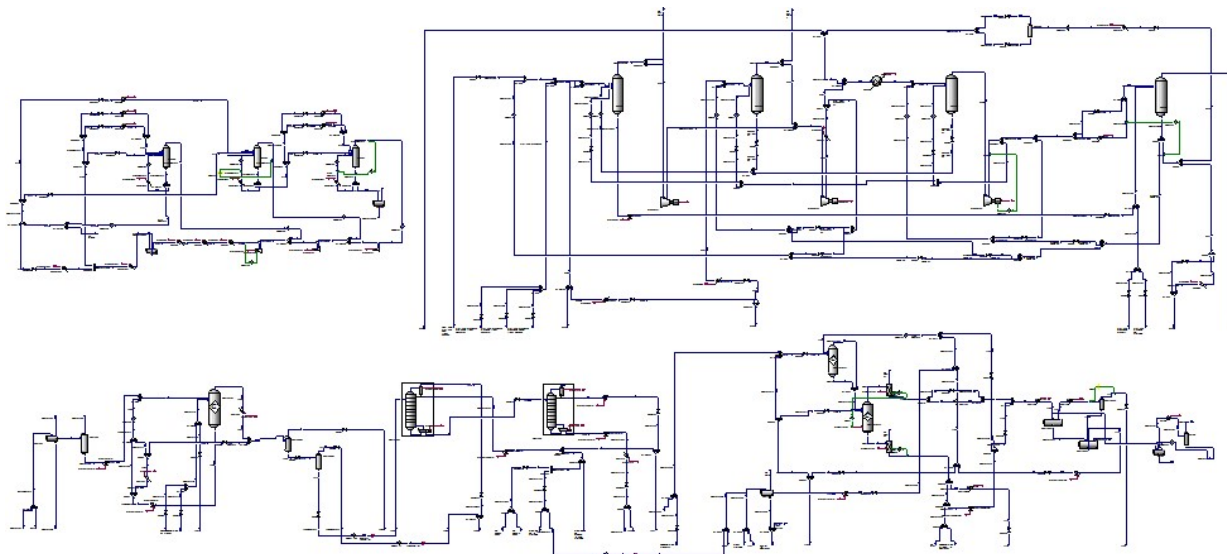

**Figure IV. 12. Simulation PFD of Stage 5**

#### **IV.5.6 Simulation Result and Evaluation**

Result for integration stage is evaluated using design data versus data from streams after integration. In the Stage 5, there are 5 units that already integrated into 1 file. The integration process uses cutter units to calculate the differences of fluid package and recycle units to recalculate streams using new data from other fluid package. The differences of fluid package can make error occur in the stream and unit operation such as columns, vessels, and reactors.

Stage 5 integration will be discussed into 2 part, there are profil temperature discussion and mass balance discussion. Figure IV.13 below show the evaluation in profil temperature between the units data compare to the integration data.

## Simulation Report – ECC 860 KTA

### Working Stage 6

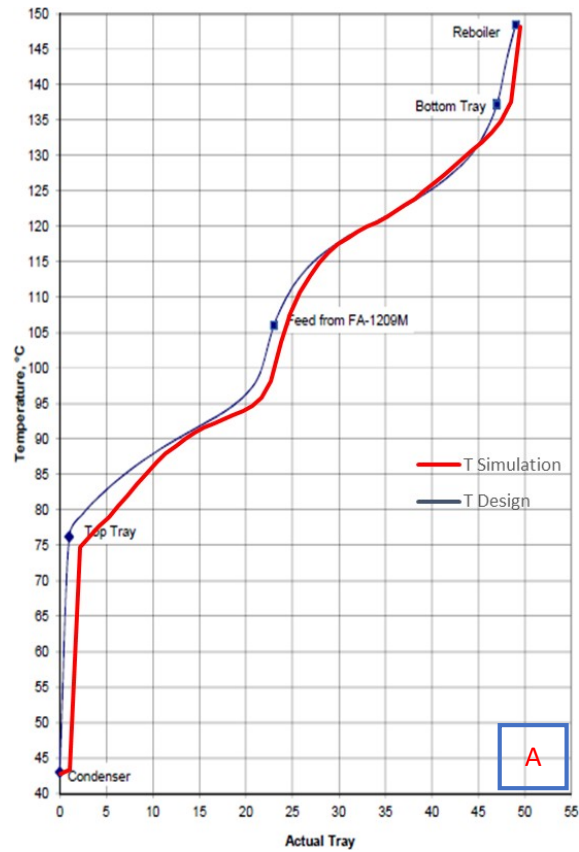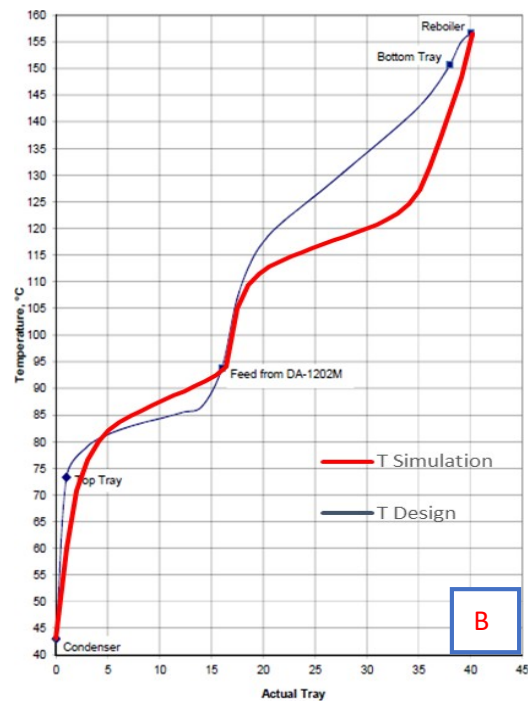

Figure IV. 13. Profil Temperature of DA-1202M (A) and DA-1203M (B)



The red line shows the stage temperature after integration while the blue line shows the stage design temperature. Overall, there are slight difference of stage temperature before and after the integration.

For mass balance evaluation, there are several streams that change compare to design data including stream 1218 and stream 1230 with the number of error are 0.06% and 0.05%, respectively. However, these changes will not affect the simulation. The change of mass balance has positive impact for the data if it is compared to the design data. Thus the integration process force the simulation reach the design data and has less error.

## **IV.6 Simulation Integration Stage 1-5**

### **IV.6.1 Process Description**

After the integration of stage 1, stage 2, stage 3, stage 4, and stage 5 there are the integration of all the stage including stage 1 to the stage 5. The simulation file that used for the stage 1-5 integration is similar with the file used for every stage integration. So the process happened in the integration stage 1-5 are identical with what described previously.

### **IV.6.2 Simulation Approach and Assumption**

To integrate the process of stage 1, stage 2, stage 3, stage 4, and stage 5 the “cutter method” is used to connect from the one stage to another. All of the stage has the more than one unit with different fluid package and components. With the cutter, the difference of the stream can be connected followed by using the recycle to input the data like the design data.

| <b>Stream</b> | <b>Description</b>                 | <b>Stream</b> | <b>Description</b>                 |
|---------------|------------------------------------|---------------|------------------------------------|
| 1102          | Connecting from stage 3 to stage 5 | 4145          | Connecting from stage 3 to stage 2 |
| 1123          | Connecting from stage 2 to stage 5 | 4167          | Connecting from stage 2 to stage 3 |
| 1230          | Connecting from stage 5 to stage 1 | 4190          | Connecting from stage 3 to stage 2 |
| 1233          | Interstage 5                       | 4201          | Connecting from stage 3 to stage 2 |
| 1241          | Interstage 5                       | 4202          | Connecting from stage 2 to stage 3 |
| 1243          | Connecting from stage 5 to stage 2 | 4208          | Connecting from stage 3 to stage 4 |
| 1246          | Interstage 5                       | 4307          | Connecting from stage 2 to stage 3 |
| 2101          | Interstage 1                       | 4315          | Interstage 2                       |
| 2117          | Interstage 1                       | 4319          | Interstage 3                       |
| 2119          | Interstage 1                       | 4324          | Connecting from stage 2 to stage 3 |
| 2120          | Interstage 1                       | 4328          | Interstage 2                       |
| 2121          | Connecting from stage 1 to stage 2 | 4329          | Interstage 2                       |
| 2123          | Interstage 1                       | 4408          | Interstage 4                       |
| 2501          | Interstage 1                       | 4458          | Interstage 4                       |
| 2505          | Connecting from stage 1 to stage 2 | 4501          | Interstage 4                       |
| 3011          | Connecting from stage 1 to stage 2 | 4532          | Connecting from stage 4 to stage 1 |
| 3012          | Interstage 2                       | 4551          | Interstage 4                       |
| 3023          | Interstage 2                       | 4553          | Interstage 4                       |

**Simulation Report – ECC 860 KTA**  
**Working Stage 6**

---

|      |                                    |      |                                    |
|------|------------------------------------|------|------------------------------------|
| 3025 | Interstage 1                       | 4572 | Interstage 4                       |
| 3038 | Interstage 1                       | 4601 | Interstage 4                       |
| 3040 | Connecting from stage 1 to stage 4 | 4701 | Connecting from stage 2 to stage 3 |
| 3041 | Interstage 1                       | 4707 | Connecting from stage 2 to stage 3 |
| 3206 | Connecting from stage 2 to stage 4 | 4729 | Connecting from stage 2 to stage 3 |
| 4012 | Interstage 3                       | 4741 | Connecting from stage 2 to stage 3 |
| 4014 | Connecting from stage 1 to stage 2 | 4742 | Connecting from stage 2 to stage 3 |
| 4016 | Connecting from stage 2 to stage 1 | 4743 | Connecting from stage 2 to stage 3 |
| 4017 | Connecting from stage 3 to stage 4 | 4744 | Connecting from stage 2 to stage 3 |
| 4061 | Connecting from stage 3 to stage 2 | 4756 | Connecting from stage 2 to stage 3 |
| 4097 | Interstage 2                       | 4759 | Interstage 2                       |
| 4104 | Connecting from stage 3 to stage 2 | 4767 | Connecting from stage 2 to stage 3 |
| 4107 | Connecting from stage 3 to stage 2 | 5208 | Connecting from stage 5 to stage 2 |
| 4141 | Connecting from stage 3 to stage 2 | 5223 | Connecting from stage 2 to stage 5 |
| 4142 | Connecting from stage 3 to stage 2 | 5228 | Connecting from stage 5 to stage 2 |
| 4143 | Connecting from stage 3 to stage 2 | 5232 | Connecting from stage 2 to stage 5 |
| 4144 | Connecting from stage 3 to stage 2 | 5235 | Connecting from stage 2 to stage 5 |

#### IV.6.3 Simulation PFD

The simulation of PFD of stage 1 to stage 5 are shown on the Figure IV.14. The detailed simulation PFD of stage 1-5 are attached in the Appendix.

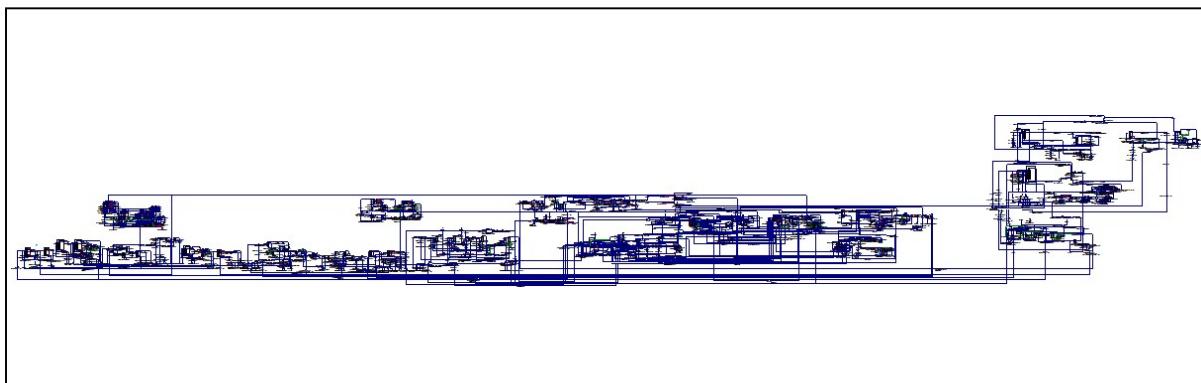

**Figure IV. 14. Simulation PFD of Stage 1-5 Integration**

#### IV.6.4 Simulation Result and Evaluation

Result for integration stage is evaluated using data from streams before integration versus data from streams after integration. In the integration of stage 1-5, there are 5 stages that already integrated into 1 file. The integration process uses cutter units to calculate the differences of fluid package and recycle units to recalculate streams using new data from other fluid package. The differences of fluid package can make error occur in the stream and unit operation such as columns, vessels, and reactors.

## Simulation Report – ECC 860 KTA

### Working Stage 6

Stage 4 integration will be discussed into 2 part, there are profil temperature discussion and mass balance discussion. Figure IV.15, Figure IV.16, Figure IV.17, and Figure IV.18 below show the evaluation of profil temperature between the units data compare to the integration data of the unit in the stage 1, stage 2, stage 4, and stage 5, respectively.

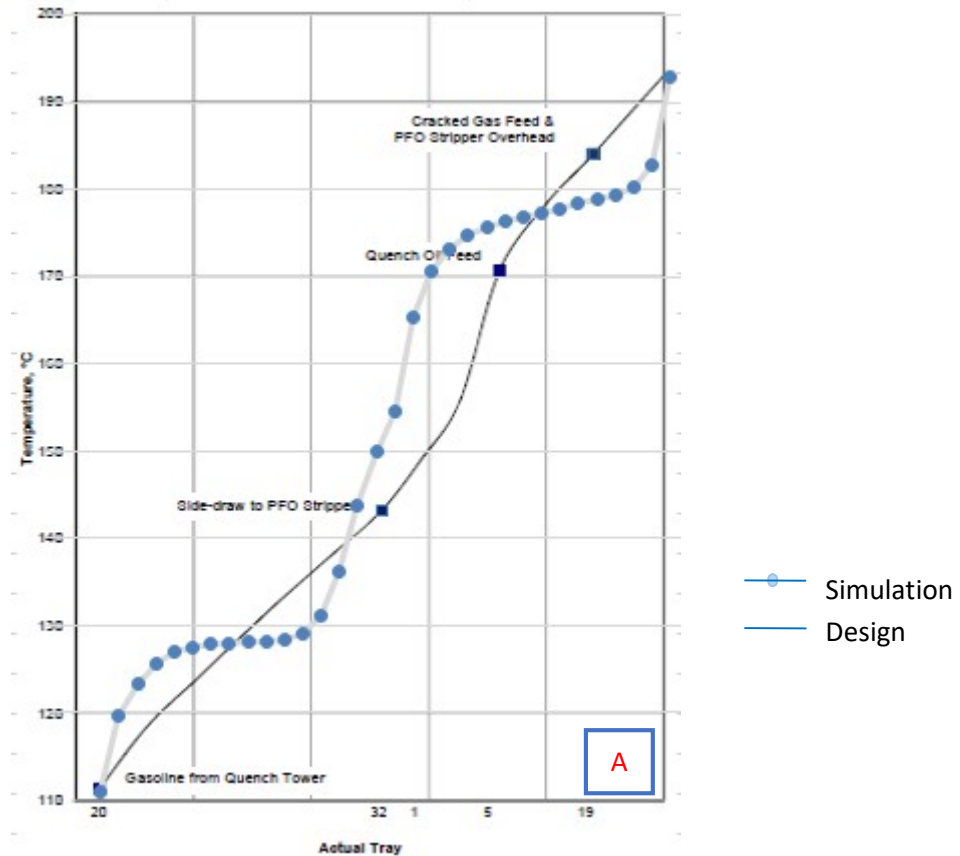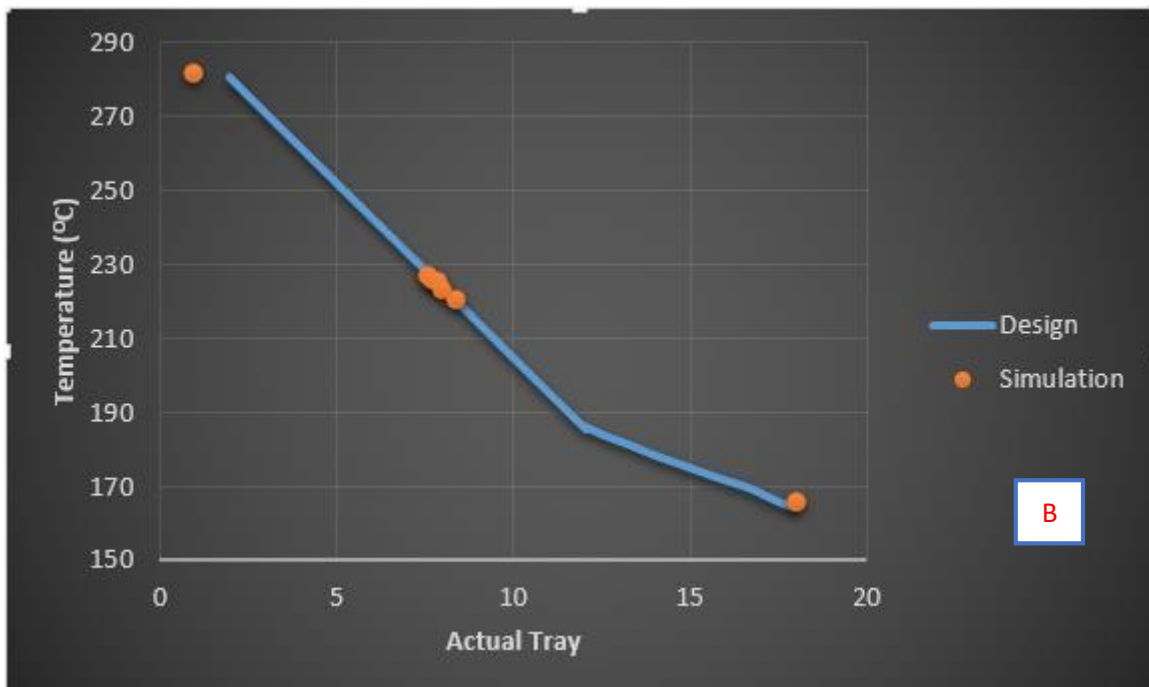

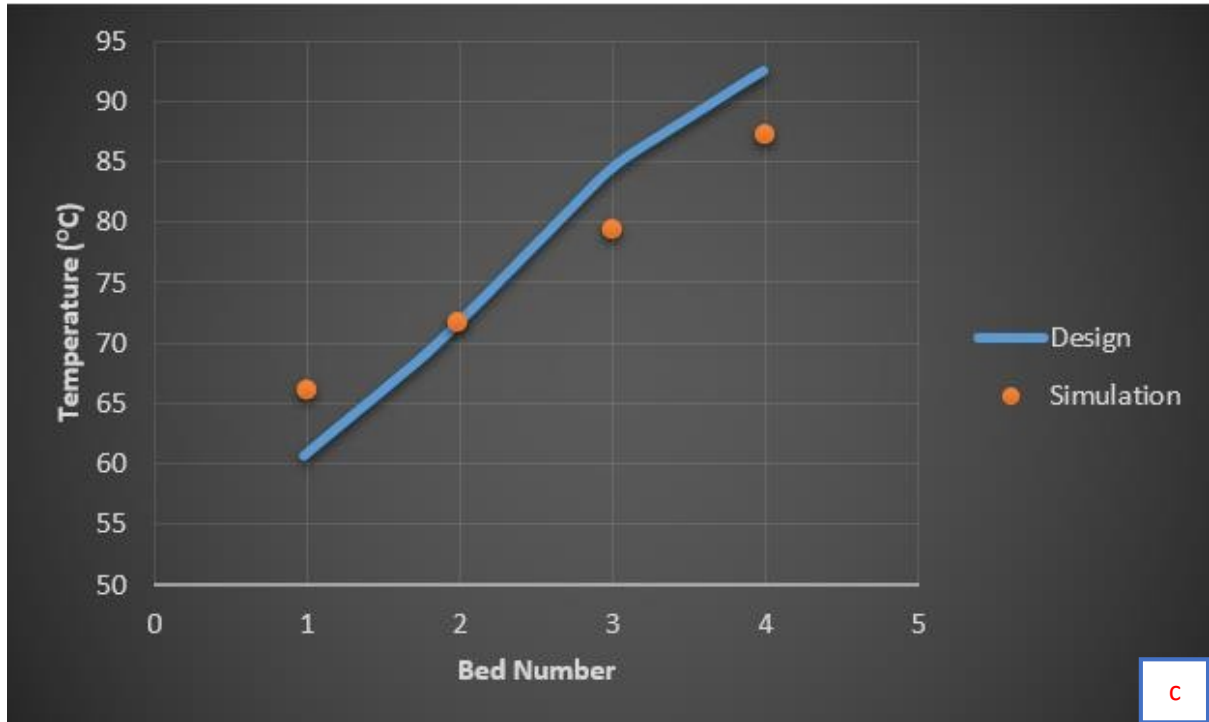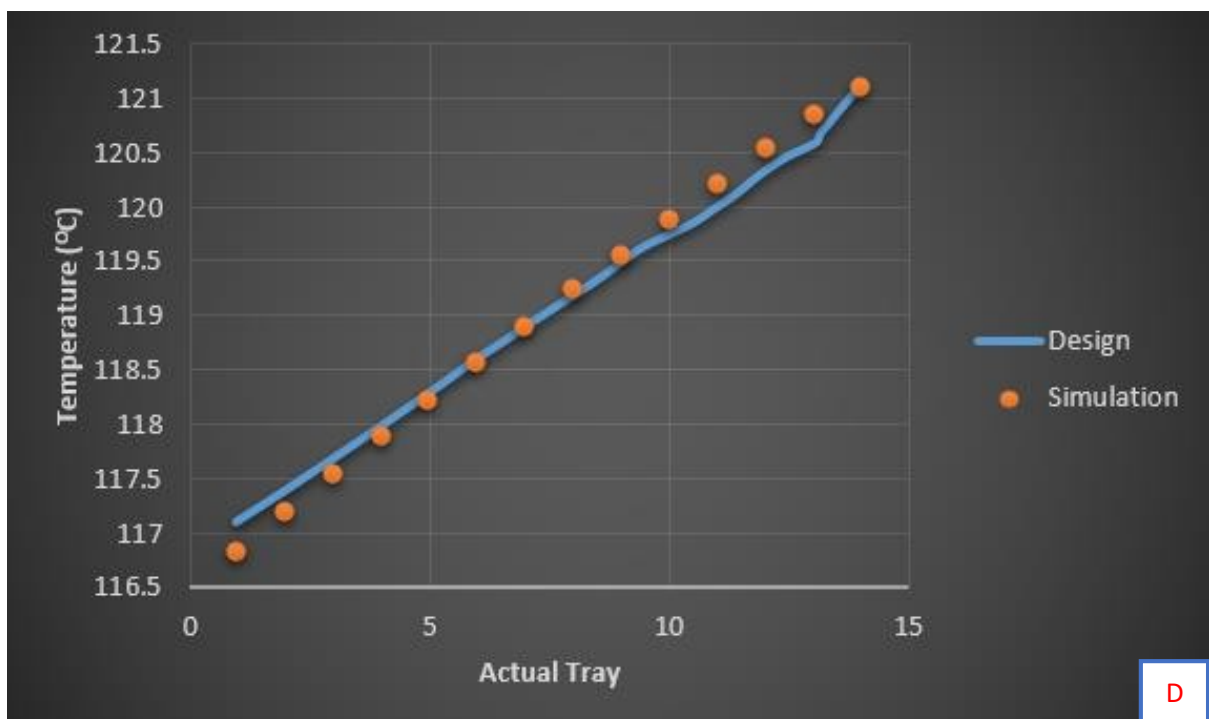

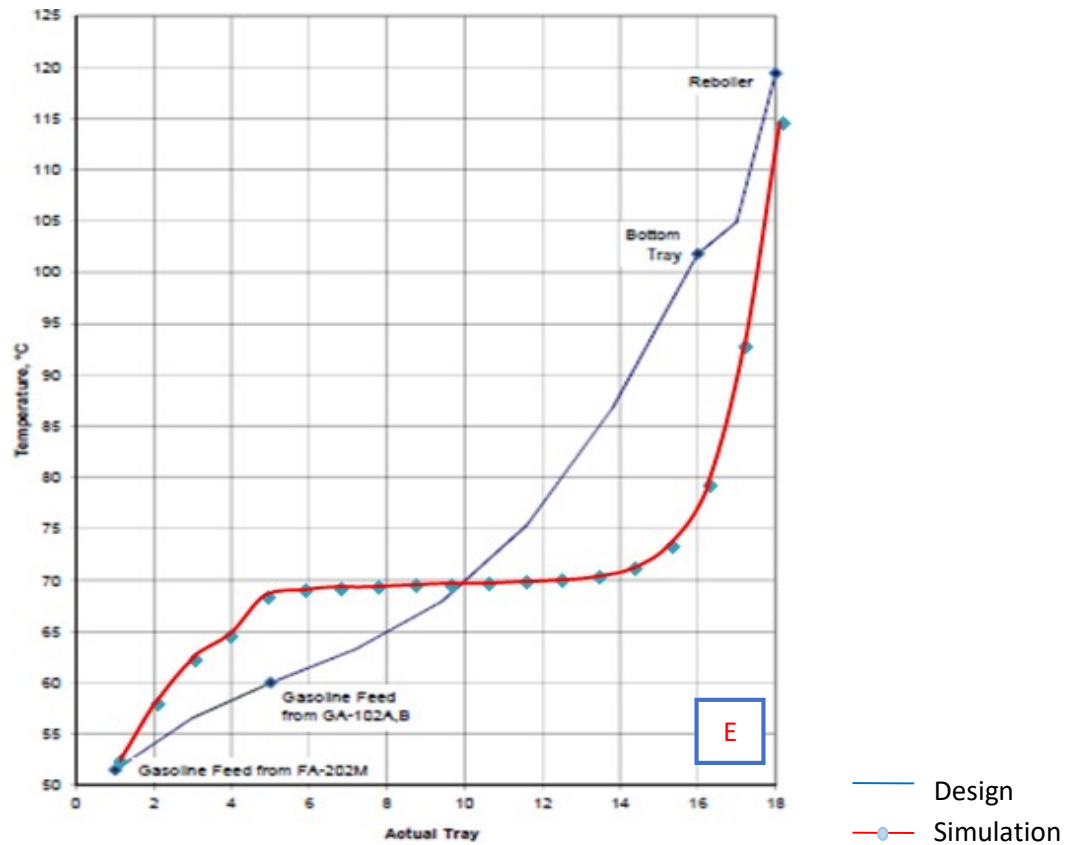

Figure IV. 15. Profil Temperature of Column DA-101(A), DA-103(B), DA-102(C), DA-104(D), and DA-204(E)

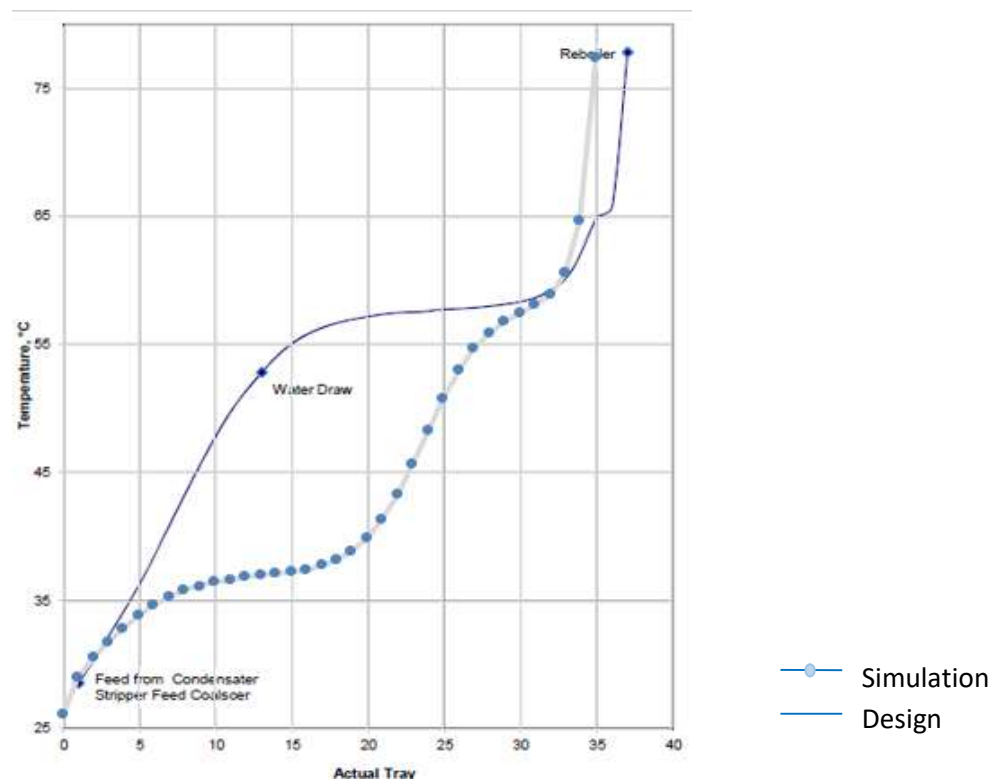

Figure IV. 16. Temperature Profile of DA-201

## Simulation Report – ECC 860 KTA

### Working Stage 6

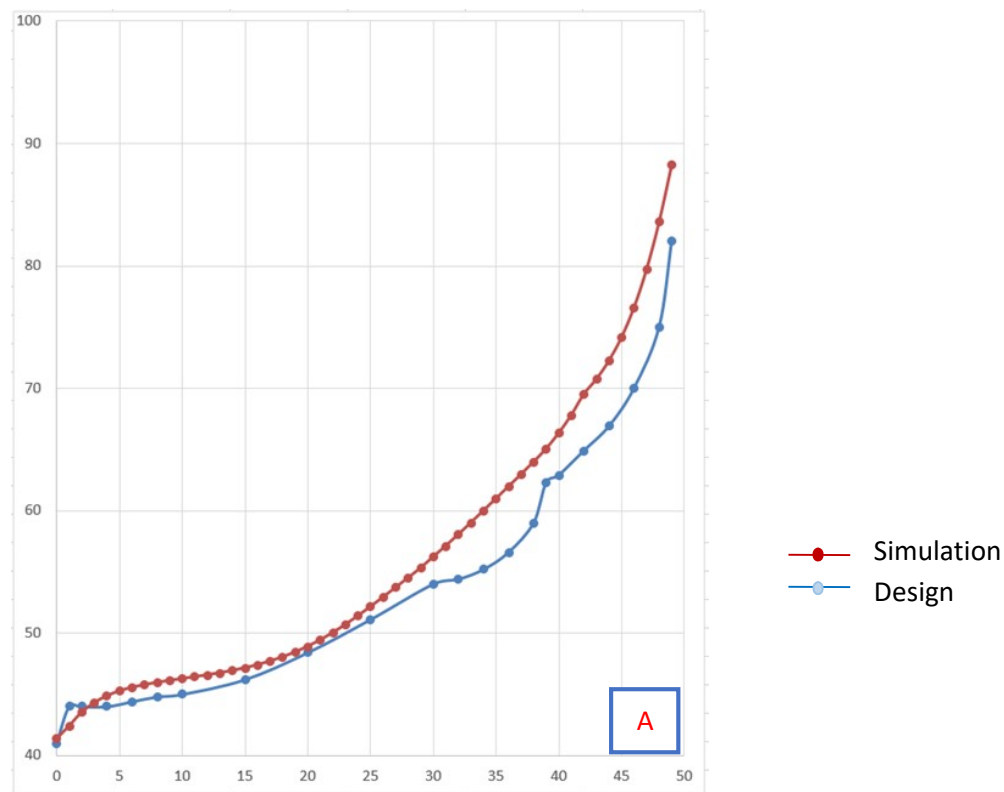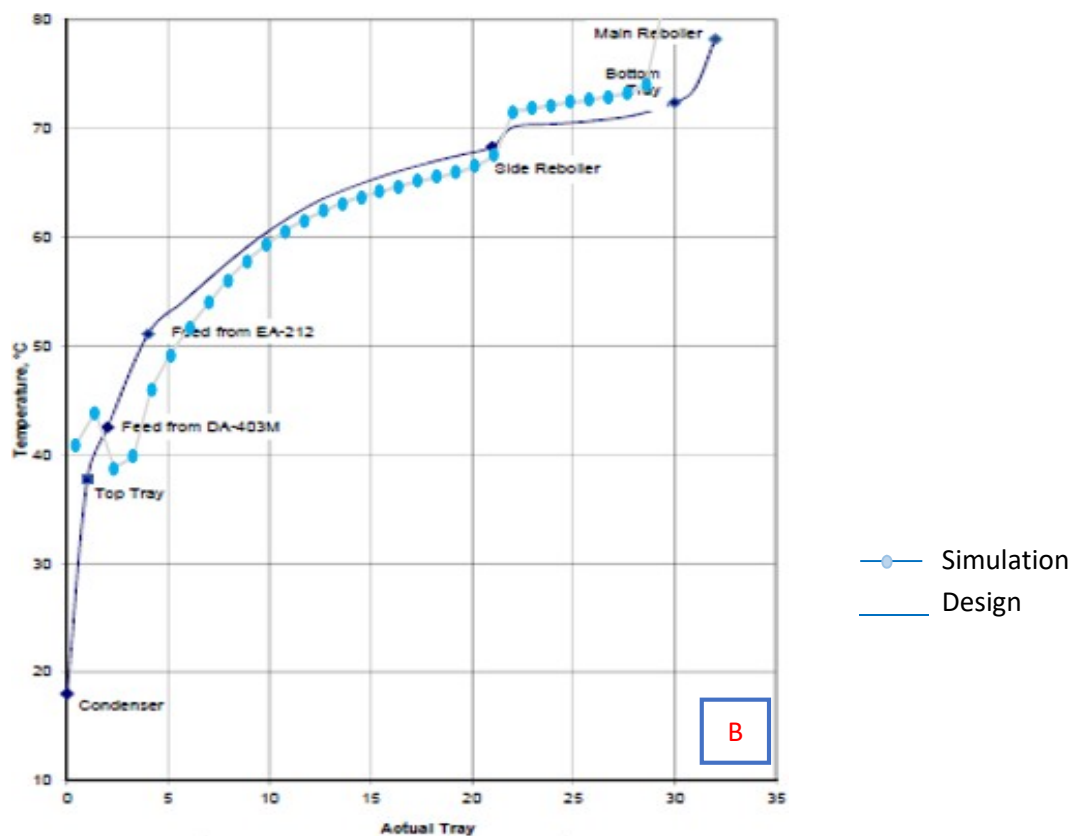

# Simulation Report – ECC 860 KTA

## Working Stage 6

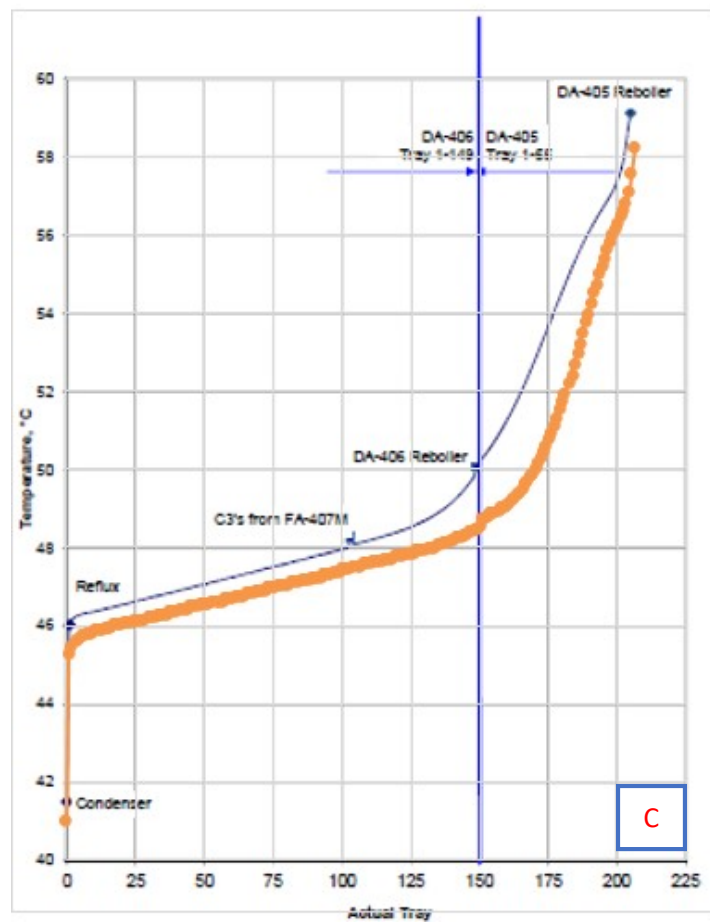

Simulation  
Design

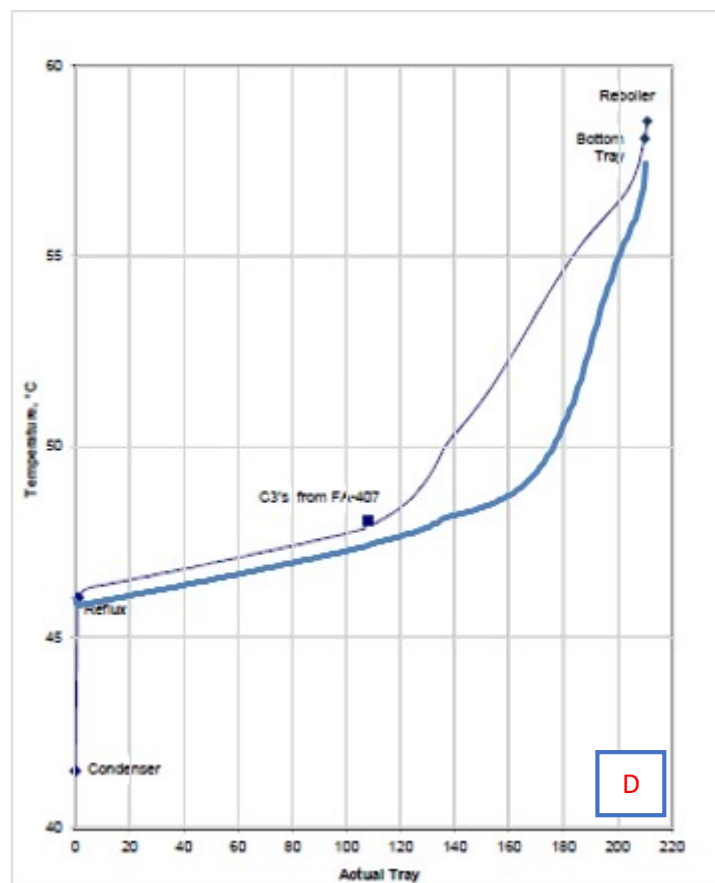

Simulation  
Design

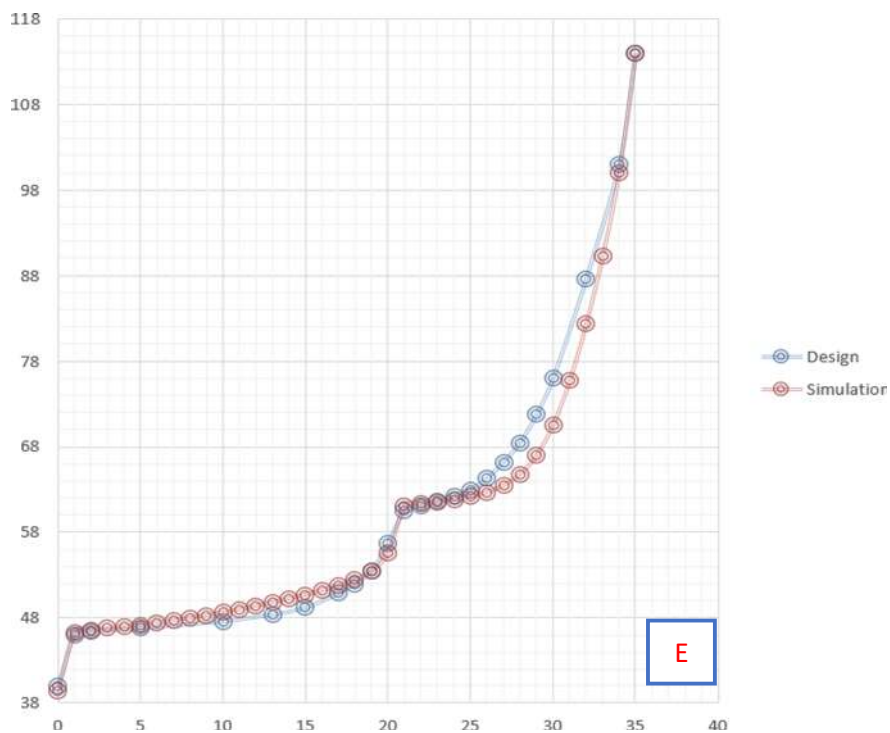

Figure IV. 17. Profil Temperature of DA-403M (A), DA-404M (B), DA-405 and DA-406 (C), DA-415M (D), DA-407 (E)

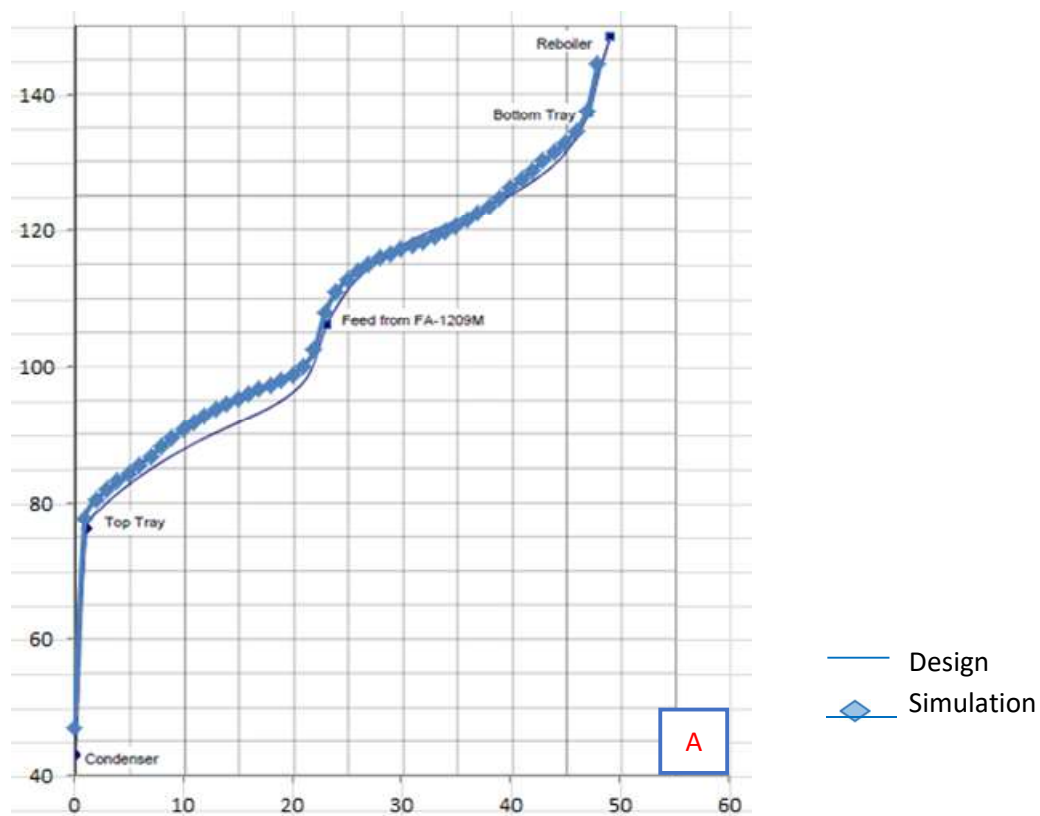



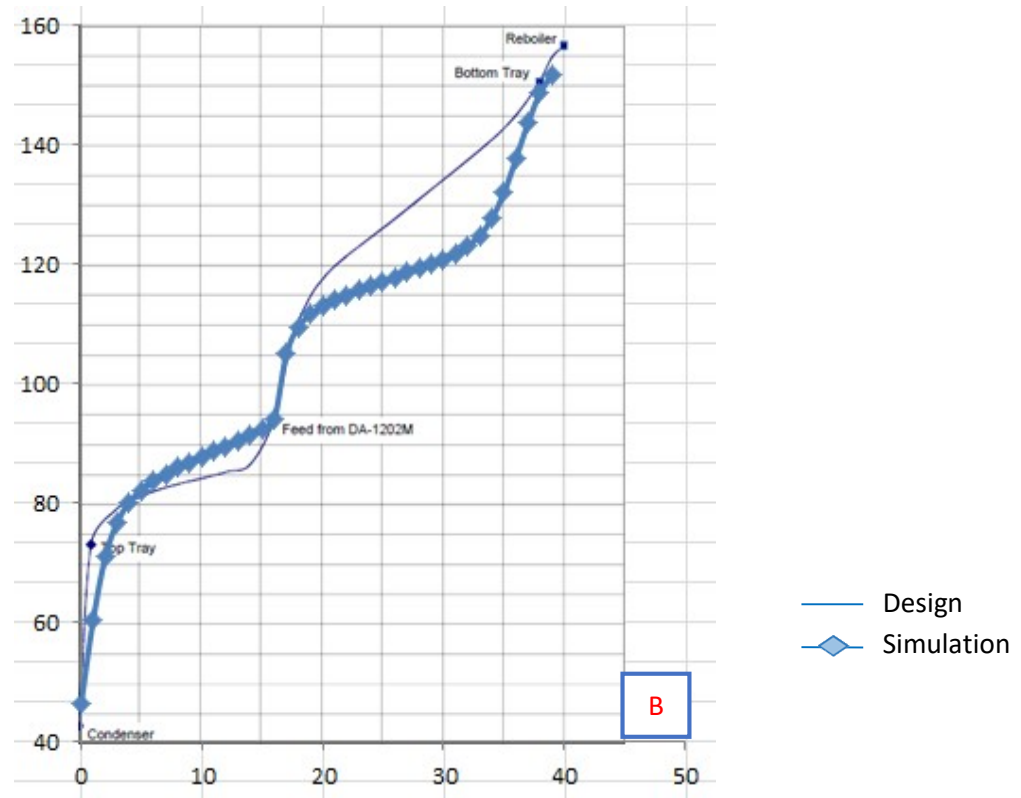

**Figure IV. 18. Profil Temperature of DA-1202M (A) and DA-1203M (B)**

Overall, there are no difference of stage temperature before and after the integration. The few differences occur in unit DA-404M meanwhile these differences are not significant so this temperature profile still accepted.

For mass balance evaluation, there are several streams that change compare to units data that shown on the Table IV.12. There are error in several streams with the number of not more than 4.1%. If the after-integration data are compared to the design data, there are several stream that has the closer number compared to the design data. It proved that integration produce the better data compared to the design data. Unfortunately there are several streams that has the bigger error compared to the design data. Moreover the error produced from the integration can be tolerate since the error are not affect the overall integration.

**Simulation Report – ECC 860 KTA**  
**Working Stage 6**

---

**Table IV. 12. Error of Stage 1 to Stage 5 Before and After Integration**

| <b>Stage 1</b> |               |                                                   |                                          |                                          |
|----------------|---------------|---------------------------------------------------|------------------------------------------|------------------------------------------|
| <b>No.</b>     | <b>Stream</b> | <b>% Error Integration 1-5 vs Unit Simulation</b> | <b>% Error Unit simulation vs Design</b> | <b>% Error Integration 1-5 vs Design</b> |
| 1              | 2101          | 2.40957                                           | -0.00115                                 | 2.40844                                  |
| <b>Stage 2</b> |               |                                                   |                                          |                                          |
| <b>No.</b>     | <b>Stream</b> | <b>% Error Integration 1-5 vs Unit Simulation</b> | <b>% Error Unit simulation vs Design</b> | <b>% Error Integration 1-5 vs Design</b> |
| 1              | 3023          | -0.19746                                          | 0.00000                                  | -0.19746                                 |
| 2              | 4101          | -0.12186                                          | -0.00083                                 | -0.12270                                 |
| 3              | 4701          | -0.34565                                          | -0.00389                                 | -0.34955                                 |
| 4              | 3063          | -0.19746                                          | 0.00000                                  | -0.19746                                 |
| 5              | <b>3062</b>   | -0.19746                                          | 0.00000                                  | -0.19746                                 |
| 6              | 3064          | -0.18020                                          | -0.05635                                 | -0.23665                                 |
| 7              | 3067          | -0.12186                                          | -0.00083                                 | -0.12270                                 |
| 8              | 3016          | -0.10112                                          | -0.08416                                 | -0.18537                                 |
| 9              | 3013          | -0.10991                                          | -0.06873                                 | -0.17872                                 |
| 10             | 3015          | -0.10929                                          | -0.06865                                 | -0.17801                                 |
| 11             | 3039          | -0.12409                                          | 1.34461                                  | 1.22219                                  |
| 12             | 3014          | -0.10929                                          | -0.06865                                 | -0.17801                                 |
| 13             | 3202          | -3.04728                                          | -2.45431                                 | -5.57638                                 |
| 14             | 3031          | -0.12512                                          | 1.34531                                  | 1.22187                                  |
| 15             | 3034          | -0.36363                                          | 0.13458                                  | -0.22856                                 |
| 16             | 3203          | 0.14831                                           | 0.59915                                  | 0.74657                                  |
| 17             | 3022          | -0.05593                                          | -0.20495                                 | -0.26099                                 |
| 18             | 3033          | -0.12763                                          | -0.43610                                 | -0.56428                                 |
| 19             | 4201          | -0.20307                                          | -0.00172                                 | -0.20479                                 |
| 20             | 4720          | -4.18177                                          | 4.74943                                  | 0.76627                                  |
| 21             | 4744          | 1.04992                                           | -0.17867                                 | 0.87313                                  |
| 22             | 4715          | -0.69845                                          | 1.43576                                  | 0.74734                                  |
| 23             | 4713          | -0.69845                                          | 1.43576                                  | 0.74734                                  |
| 24             | 4743          | 1.78108                                           | -6.63794                                 | -4.73863                                 |
| 25             | 4714          | 1.78108                                           | -6.63794                                 | -4.73863                                 |
| 26             | 4716          | -3.14418                                          | 3.60230                                  | 0.57138                                  |
| 27             | 4718          | -3.14418                                          | 3.60230                                  | 0.57138                                  |
| 28             | 4717          | 1.04992                                           | -0.17867                                 | 0.87313                                  |
| 29             | 4719          | -1.33943                                          | 1.55105                                  | 0.23239                                  |
| 30             | 4721          | -1.80232                                          | 1.80667                                  | 0.03691                                  |
| 31             | 4722          | -1.80232                                          | 1.80667                                  | 0.03691                                  |
| 32             | 4725          | -3.89883                                          | 4.40657                                  | 0.67954                                  |
| 33             | 4728          | -0.62871                                          | 0.64929                                  | 0.02466                                  |
| 34             | 4727          | -0.62871                                          | 0.64929                                  | 0.02466                                  |
| 35             | 4726          | -3.89883                                          | 4.40657                                  | 0.67954                                  |

**Simulation Report – ECC 860 KTA**  
**Working Stage 6**

---

| 36             | 4724          | -4.18177                                          | 4.74943                                  | 0.76627                                  |
|----------------|---------------|---------------------------------------------------|------------------------------------------|------------------------------------------|
| 37             | 4723          | -1.19744                                          | 1.47217                                  | 0.29236                                  |
| 38             | 5235          | 0.34910                                           | 1.74687                                  | 2.08987                                  |
| 39             | 5232          | -0.36667                                          | -1.44577                                 | -1.07517                                 |
| 40             | 5229          | -1.01463                                          | -4.79388                                 | -5.85716                                 |
| <b>Stage 3</b> |               |                                                   |                                          |                                          |
| <b>No.</b>     | <b>Stream</b> | <b>% Error Integration 1-5 vs Unit Simulation</b> | <b>% Error Unit simulation vs Design</b> | <b>% Error Integration 1-5 vs Design</b> |
| 1              | 4187          | 0.14000                                           | -0.02788                                 | 0.11570                                  |
| 2              | 4184          | 1.55000                                           | 0.29827                                  | -1.24841                                 |
| 3              | 4166          | 1.54000                                           | -0.15942                                 | 1.37814                                  |
| 4              | 4225          | 0.58000                                           | 0.06150                                  | 0.63841                                  |
| 5              | 4227          | 0.58000                                           | 0.06174                                  | 0.63841                                  |
| 6              | 4312          | 0.17000                                           | -0.02061                                 | 0.15235                                  |
| 7              | 4313          | 0.22000                                           | -0.04345                                 | 0.17951                                  |
| 8              | 4316          | 0.16000                                           | -0.15698                                 | 0.00000                                  |
| 9              | 4317          | 1.53000                                           | -0.18108                                 | 1.35181                                  |
| 10             | 4321          | 0.10000                                           | -0.29039                                 | -0.39202                                 |
| 11             | 4167          | 0.10942                                           | -0.10954                                 | 0.00000                                  |
| 12             | 4155          | 0.34017                                           | -0.00418                                 | -0.34436                                 |
| 13             | 4156          | 34.97034                                          | 25.90965                                 | 0.00000                                  |
| 14             | 4166          | 1.53511                                           | -0.15942                                 | 1.37814                                  |
| 15             | 4185          | 0.12240                                           | -0.02377                                 | 0.09865                                  |
| 16             | 4187          | 0.14355                                           | -0.02789                                 | 0.11570                                  |
| 17             | 4009          | 0.23409                                           | 0.08881                                  | -0.14507                                 |
| 18             | 1102          | 0.05724                                           | -0.05727                                 | 0.00000                                  |
| 19             | 4097          | 0.52632                                           | 0.52356                                  | 0.00000                                  |
| 20             | 4315          | 0.09235                                           | 0.00000                                  | -0.09235                                 |
| 21             | 4225          | 0.57727                                           | 0.06150                                  | 0.63841                                  |
| 22             | 4227          | 0.57702                                           | 0.06174                                  | 0.63841                                  |
| 23             | 4315          | 0.09235                                           | 0.00000                                  | -0.09235                                 |
| 24             | 4061          | 0.07226                                           | 0.07221                                  | 0.00000                                  |
| 25             | 4318          | 0.58497                                           | -0.58841                                 | 0.00000                                  |
| 26             | 4305          | 0.05517                                           | -0.15815                                 | -0.21340                                 |
| 27             | 4316          | 0.15674                                           | -0.15698                                 | 0.00000                                  |
| 28             | 4317          | 1.53012                                           | -0.18108                                 | 1.35181                                  |
| 29             | 4321          | 0.10134                                           | -0.29039                                 | -0.39202                                 |
| <b>Stage 4</b> |               |                                                   |                                          |                                          |
| <b>No.</b>     | <b>Stream</b> | <b>% Error Integration 1-5 vs Unit Simulation</b> | <b>% Error Unit simulation vs Design</b> | <b>% Error Integration 1-5 vs Design</b> |
| 1              | 4572          | 0.23588                                           | 15.63112                                 | 15.43164                                 |
| 2              | 4571          | 0.16336                                           | 15.56979                                 | 15.43164                                 |
| 3              | 4422          | 0.12644                                           | -0.07841                                 | -0.20511                                 |

## CHAPTER V

### CONCLUSION AND RECOMMENDATION

#### V.1 Conclusion

The conclusion of the integration of stage 1 to stage 5 are listed below:

1. All unit in the stage 1 to the stage 5 were simulated and evaluated
2. The integration of stage 1 to the stage 5 were successfully converged
3. Stage 1 has been simulated and convergence. There are several difference of temperature profile of tray column especially in DA-101 and DA-204 which is tolerable because the condition of inlet and outlet has been achieved. The temperature profile of some Simulation yields a satisfied result. The largest error occurred in unit 2 on the temperature of Stream 2117 at 17.5% while The second largest process condition error of 8.5% is found in the temperature of Stream 2109. In flow 2510 unit 3, the error on temperature is 7.5%. Other than these, the error are consistent below 5% with majority below 1%.
4. In Stage 2, which is successfully simulated and convergence, there are significant temperature differences between tray 1 to tray 35 in DA-201. However, the properties of the flow in the inlet and outlet of the column has been achieved. The biggest error occurred in pressure at stream 3023 which is 56.95%. Other significant error also occurred at Spent Caustic Pre-Treatment stream 3093 with error around 6.71% at the molar flow. Other than that, the errors are either lower than 3% or insignificant in terms of its respective quantity.
5. The error average of this stage 3 simulation is approximately 0.06%, mainly contributed by molar flow variable. The error sprung by molar flow variable mainly caused by the error in composition. For flow 4021, temperature raises the error average from 0.15% (calculated without considering the temperature error) to 0.23%. This huge error in the 4021. The error from temperature variable, though more than 0,01%, is negligible in the simulation.
6. There are slight error in temperature profile stage 4. The significant difference occurs in the unit DA-415M. The difference reached 3 °C at its highest gap. For mass balance evaluation, there are several streams that change compared to design data including stream 4561, stream 4423, stream 4422, stream 4413, and stream 3206 with the number of error are 5.84%, 0.09%, 0.20%, 0.10%, and 0.11%, respectively.
7. Overall, a slight difference of stage temperature before and after the integration occurred in stage 5. For mass balance evaluation, there are several streams that change compare to design data including stream 1218 and stream 1230 with the number of error are 0.06% and 0.05%, respectively. However, these changes will not affect the simulation. The change of mass balance has positive impact for the data if it is compared to the design data. Thus the integration process force the simulation reach the design data and has less error.

8. For mass balance evaluation of integration 1-5, there are several streams that change compare to units data. There are error in several streams with the number of not more than 4.1% (4572,4571, 4156). Overall, integration 1-5 produces a slightly better output in respect to the design. Temperature profile for column perfectly matches the stage integration except DA-404M

### **Recommendation**

It is highly recommended to simulate the whole plant continuously from stage 1 to stage 5. This is important in order to ensure the accuracy of the simulation since changes between fluid package tends to diminish the accuracy.

## APPENDIX

### A. Component List

#### A.1. Stage 1

Table A.1.1. Stage 1 Stream Composition & Properties

| 2016                                |            | Design     | %Error |
|-------------------------------------|------------|------------|--------|
| Component (%mol)                    |            |            |        |
| Hydrogen                            | 0.0326     | 0.0326     | -0.02  |
| Carbon Monoxide                     | 0.0002     | 0.0002     | -0.02  |
| Carbon Dioxide                      | 0.0001     | 0.0001     | -0.02  |
| Hydrogen Sulphide                   | 0.0000     | 0.0000     |        |
| Methane                             | 0.0707     | 0.0707     | -0.02  |
| Acetylene                           | 0.0014     | 0.0014     | -0.02  |
| Ethylene                            | 0.0715     | 0.0715     | -0.02  |
| Ethane                              | 0.0089     | 0.0089     | -0.02  |
| Propadiene/Propyne                  | 0.0013     | 0.0013     | -0.02  |
| Propylene                           | 0.0291     | 0.0291     | -0.02  |
| Propane                             | 0.0008     | 0.0008     | -0.02  |
| Butadienes/C4Acetylenes             | 0.0058     | 0.0058     | -0.02  |
| Butylenes                           | 0.0080     | 0.0080     | -0.02  |
| Butanes                             | 0.0026     | 0.0026     | -0.02  |
| C5-Hydrocarbons                     | 0.0048     | 0.0048     | -0.02  |
| C6 Non-Aromatics                    | 0.0016     | 0.0016     | -0.02  |
| C7 Non-Aromatics                    | 0.0007     | 0.0007     | -0.02  |
| C8 Non-Aromatics                    | 0.0003     | 0.0003     | -0.02  |
| Benzene                             | 0.0064     | 0.0064     | -0.02  |
| Toluene                             | 0.0049     | 0.0049     | -0.02  |
| Xylenes/Ethylbenzene                | 0.0012     | 0.0012     | -0.02  |
| Styrene                             | 0.0007     | 0.0007     | -0.02  |
| C9-204°C                            | 0.0025     | 0.0025     | -0.02  |
| 204-288°C PGO                       | 0.1290     | 0.1290     | -0.02  |
| 288°C plus PFO                      | 0.3950     | 0.3949     | -0.02  |
| Steam/Water                         | 0.2198     | 0.2198     | -0.02  |
| <b>Operation Condition</b>          |            |            |        |
| Temperature (°C)                    | 193.70     | 193.70     | 0.00   |
| Pressure (Kg/cm <sup>2</sup> gauge) | 0.83       | 0.83       | 0.00   |
| Molar Flow (kgmole/h)               | 10794.37   | 10796.30   | 0.02   |
| Mass Flow (kg/h)                    | 1714882.00 | 1714882.00 | 0.00   |
| Molecular Weight                    | 158.87     | 158.84     | -0.02  |
| Total                               | 1.0000     | 0.9998     |        |
| 2031                                |            | Design     | %Error |

**Simulation Report – ECC 860 KTA**  
**Working Stage 6**

| <b>Component (%mol)</b>             |           |               |               |
|-------------------------------------|-----------|---------------|---------------|
| Hydrogen                            | 0.0354    | 0.0354        | 0.00          |
| Carbon Monoxide                     | 0.0003    | 0.0003        | 0.00          |
| Carbon Dioxide                      | 0.0001    | 0.0001        | 0.00          |
| Hydrogen Sulphide                   | 0.0000    | 0.0000        |               |
| Methane                             | 0.0767    | 0.0767        | 0.00          |
| Acetylene                           | 0.0015    | 0.0015        | 0.00          |
| Ethylene                            | 0.0776    | 0.0776        | 0.00          |
| Ethane                              | 0.0097    | 0.0097        | 0.00          |
| Propadiene/Propyne                  | 0.0015    | 0.0015        | 0.00          |
| Propylene                           | 0.0315    | 0.0315        | 0.00          |
| Propane                             | 0.0008    | 0.0008        | 0.00          |
| Butadienes/C4Acetylenes             | 0.0063    | 0.0063        | 0.00          |
| Butylenes                           | 0.0087    | 0.0087        | 0.00          |
| Butanes                             | 0.0028    | 0.0028        | 0.00          |
| C5-Hydrocarbons                     | 0.0052    | 0.0052        | 0.00          |
| C6 Non-Aromatics                    | 0.0017    | 0.0017        | 0.00          |
| C7 Non-Aromatics                    | 0.0008    | 0.0008        | 0.00          |
| C8 Non-Aromatics                    | 0.0003    | 0.0003        | 0.00          |
| Benzene                             | 0.0069    | 0.0069        | 0.00          |
| Toluene                             | 0.0053    | 0.0053        | 0.00          |
| Xylenes/Ethylbenzene                | 0.0012    | 0.0012        | 0.00          |
| Styrene                             | 0.0008    | 0.0008        | 0.00          |
| C9-204°C                            | 0.0027    | 0.0027        | 0.00          |
| 204-288°C PGO                       | 0.1328    | 0.1328        | 0.00          |
| 288°C plus PFO                      | 0.4065    | 0.4065        | 0.00          |
| Steam/Water                         | 0.1829    | 0.1829        | 0.00          |
| <b>Operation Condition</b>          |           |               |               |
| Temperature (°C)                    | 193.90    | 193.90        | 0.00          |
| Pressure (Kg/cm <sup>2</sup> gauge) | 0.90      | 0.90          | 0.00          |
| Molar Flow (kgmole/h)               | 6112.67   | 6113.00       | 0.01          |
| Mass Flow (kg/h)                    | 997427.00 | 997427.00     | 0.00          |
| Molecular Weight                    | 163.17    | 163.17        | 0.00          |
| Total                               | 1.0000    | 1.0000        |               |
| <b>2046</b>                         |           | <b>Design</b> | <b>%Error</b> |
| <b>Component (%mol)</b>             |           |               |               |
| Hydrogen                            | 0.0336    | 0.0336        | -0.05         |
| Carbon Monoxide                     | 0.0002    | 0.0003        | 21.27         |
| Carbon Dioxide                      | 0.0001    | 0.0001        | -0.01         |
| Hydrogen Sulphide                   | 0.0000    | 0.0000        |               |
| Methane                             | 0.0729    | 0.0729        | 0.03          |
| Acetylene                           | 0.0014    | 0.0014        | -2.60         |
| Ethylene                            | 0.0737    | 0.0737        | -0.02         |

**Simulation Report – ECC 860 KTA**  
**Working Stage 6**

|                                     |            |            |       |
|-------------------------------------|------------|------------|-------|
| Ethane                              | 0.0092     | 0.0092     | 0.10  |
| Propadiene/Propyne                  | 0.0014     | 0.0014     | 1.97  |
| Propylene                           | 0.0300     | 0.0300     | 0.10  |
| Propane                             | 0.0008     | 0.0008     | -0.01 |
| Butadienes/C4Acetylenes             | 0.0060     | 0.0060     | 0.31  |
| Butylenes                           | 0.0083     | 0.0083     | 0.55  |
| Butanes                             | 0.0027     | 0.0027     | 1.01  |
| C5-Hydrocarbons                     | 0.0049     | 0.0049     | -0.92 |
| C6 Non-Aromatics                    | 0.0016     | 0.0017     | 3.74  |
| C7 Non-Aromatics                    | 0.0007     | 0.0007     | -5.18 |
| C8 Non-Aromatics                    | 0.0003     | 0.0003     | -0.01 |
| Benzene                             | 0.0066     | 0.0065     | -1.26 |
| Toluene                             | 0.0050     | 0.0051     | 1.07  |
| Xylenes/Ethylbenzene                | 0.0012     | 0.0012     | -0.01 |
| Styrene                             | 0.0007     | 0.0008     | 7.97  |
| C9-204°C                            | 0.0026     | 0.0026     | 1.05  |
| 204-288°C PGO                       | 0.1304     | 0.1304     | 0.01  |
| 288°C plus PFO                      | 0.3991     | 0.3991     | -0.01 |
| Steam/Water                         | 0.2065     | 0.2065     | 0.01  |
| <b>Operation Condition</b>          |            |            |       |
| Temperature (°C)                    | 193.73     | 193.80     | 0.03  |
| Pressure (Kg/cm <sup>2</sup> gauge) | 0.83       | 0.83       | 0.00  |
| Molar Flow (kgmole/h)               | 16907.04   | 16909.30   | 0.01  |
| Mass Flow (kg/h)                    | 2712309.00 | 2712309.00 | 0.00  |
| Molecular Weight                    | 160.42     | 160.40     | -0.02 |
| Total                               | 1.0000     | 1.0002     |       |

| 2044                    |        | Design | %Error |
|-------------------------|--------|--------|--------|
| Component (%mol)        |        |        |        |
| Hydrogen                | 0.0221 | 0.0221 | 0.02   |
| Carbon Monoxide         | 0.0002 | 0.0002 | 0.02   |
| Carbon Dioxide          | 0.0001 | 0.0001 | 0.02   |
| Hydrogen Sulphide       | 0.0000 | 0.0000 |        |
| Methane                 | 0.0480 | 0.0480 | 0.02   |
| Acetylene               | 0.0009 | 0.0009 | 0.02   |
| Ethylene                | 0.0483 | 0.0483 | 0.02   |
| Ethane                  | 0.0060 | 0.0060 | 0.02   |
| Propadiene/Propyne      | 0.0009 | 0.0009 | 0.02   |
| Propylene               | 0.0198 | 0.0198 | 0.02   |
| Propane                 | 0.0005 | 0.0005 | 0.02   |
| Butadienes/C4Acetylenes | 0.0041 | 0.0041 | 0.02   |
| Butylenes               | 0.0056 | 0.0056 | 0.02   |
| Butanes                 | 0.0018 | 0.0018 | 0.02   |



**Simulation Report – ECC 860 KTA**  
**Working Stage 6**

|                                     |            |               |               |
|-------------------------------------|------------|---------------|---------------|
| C5-Hydrocarbons                     | 0.0034     | 0.0034        | 0.02          |
| C6 Non-Aromatics                    | 0.0012     | 0.0012        | 0.02          |
| C7 Non-Aromatics                    | 0.0006     | 0.0006        | 0.02          |
| C8 Non-Aromatics                    | 0.0003     | 0.0003        | 0.02          |
| Benzene                             | 0.0049     | 0.0049        | 0.02          |
| Toluene                             | 0.0041     | 0.0041        | 0.02          |
| Xylenes/Ethylbenzene                | 0.0010     | 0.0010        | 0.02          |
| Styrene                             | 0.0007     | 0.0007        | 0.02          |
| C9-204°C                            | 0.0026     | 0.0026        | 0.02          |
| 204-288°C PGO                       | 0.1655     | 0.1655        | 0.02          |
| 288°C plus PFO                      | 0.5071     | 0.5072        | 0.02          |
| Steam/Water                         | 0.1504     | 0.1504        | 0.02          |
| <b>Operation Condition</b>          |            |               |               |
| Temperature (°C)                    | 193.80     | 193.80        | 0.00          |
| Pressure (Kg/cm <sup>2</sup> gauge) | 0.83       | 0.83          | 0.00          |
| Molar Flow (kgmole/h)               | 10671.67   | 10669.50      | -0.02         |
| Mass Flow (kg/h)                    | 2103853.00 | 2103853.00    | 0.00          |
| Molecular Weight                    | 197.14     | 197.18        | 0.02          |
| Total                               | 1.0000     | 1.0002        |               |
| <b>2021</b>                         |            | <b>Design</b> | <b>%Error</b> |
| <b>Component (%mol)</b>             |            |               |               |
| Hydrogen                            | 0.2350     | 0.2350        | 0.00          |
| Carbon Monoxide                     | 0.0004     | 0.0004        | 0.00          |
| Carbon Dioxide                      | 0.0002     | 0.0002        | 0.00          |
| Hydrogen Sulphide                   | 0.0000     | 0.0000        |               |
| Methane                             | 0.0556     | 0.0556        | 0.00          |
| Acetylene                           | 0.0022     | 0.0022        | 0.00          |
| Ethylene                            | 0.2374     | 0.2374        | 0.00          |
| Ethane                              | 0.1359     | 0.1359        | 0.00          |
| Propadiene/Propyne                  | 0.0004     | 0.0004        | 0.00          |
| Propylene                           | 0.0085     | 0.0085        | 0.00          |
| Propane                             | 0.0029     | 0.0029        | 0.00          |
| Butadienes/C4Acetylenes             | 0.0040     | 0.0040        | 0.00          |
| Butylenes                           | 0.0007     | 0.0007        | 0.00          |
| Butanes                             | 0.0005     | 0.0005        | 0.00          |
| C5-Hydrocarbons                     | 0.0009     | 0.0009        | 0.00          |
| C6 Non-Aromatics                    | 0.0005     | 0.0005        | 0.00          |
| C7 Non-Aromatics                    | 0.0001     | 0.0001        | 0.00          |
| C8 Non-Aromatics                    | 0.0000     | 0.0000        |               |
| Benzene                             | 0.0015     | 0.0015        | 0.00          |
| Toluene                             | 0.0003     | 0.0003        | 0.00          |
| Xylenes/Ethylbenzene                | 0.0000     | 0.0000        |               |
| Styrene                             | 0.0001     | 0.0001        | 0.00          |

**Simulation Report – ECC 860 KTA**  
**Working Stage 6**

|                                     |          |               |               |
|-------------------------------------|----------|---------------|---------------|
| C9-204°C                            | 0.0003   | 0.0003        | 0.00          |
| 204-288°C PGO                       | 0.0001   | 0.0001        | 0.00          |
| 288°C plus PFO                      | 0.0001   | 0.0001        | 0.00          |
| Steam/Water                         | 0.3124   | 0.3124        | 0.00          |
| <b>Operation Condition</b>          |          |               |               |
| Temperature (°C)                    | 214.60   | 214.60        | 0.00          |
| Pressure (Kg/cm <sup>2</sup> gauge) | 0.87     | 0.87          | 0.00          |
| Molar Flow (kgmole/h)               | 1141.34  | 1141.40       | 0.01          |
| Mass Flow (kg/h)                    | 21628.00 | 21628.00      | 0.00          |
| Molecular Weight                    | 18.95    | 18.95         | 0.00          |
| Total                               | 1.0000   | 1.0000        |               |
| <b>2015</b>                         |          | <b>Design</b> | <b>%Error</b> |
| <b>Component (%mol)</b>             |          |               |               |
| Hydrogen                            | 0.0380   | 0.0380        | -0.01         |
| Carbon Monoxide                     | 0.0002   | 0.0002        | -0.01         |
| Carbon Dioxide                      | 0.0001   | 0.0001        | -0.01         |
| Hydrogen Sulphide                   | 0.0000   | 0.0000        |               |
| Methane                             | 0.0685   | 0.0685        | -0.01         |
| Acetylene                           | 0.0014   | 0.0014        | -0.01         |
| Ethylene                            | 0.0748   | 0.0748        | -0.01         |
| Ethane                              | 0.0125   | 0.0125        | -0.01         |
| Propadiene/Propyne                  | 0.0013   | 0.0013        | -0.01         |
| Propylene                           | 0.0277   | 0.0277        | -0.01         |
| Propane                             | 0.0008   | 0.0008        | -0.01         |
| Butadienes/C4Acetylenes             | 0.0056   | 0.0056        | -0.01         |
| Butylenes                           | 0.0076   | 0.0076        | -0.01         |
| Butanes                             | 0.0025   | 0.0025        | -0.01         |
| C5-Hydrocarbons                     | 0.0045   | 0.0045        | -0.01         |
| C6 Non-Aromatics                    | 0.0015   | 0.0015        | -0.01         |
| C7 Non-Aromatics                    | 0.0007   | 0.0007        | -0.01         |
| C8 Non-Aromatics                    | 0.0003   | 0.0003        | -0.01         |
| Benzene                             | 0.0061   | 0.0061        | -0.01         |
| Toluene                             | 0.0047   | 0.0047        | -0.01         |
| Xylenes/Ethylbenzene                | 0.0011   | 0.0011        | -0.01         |
| Styrene                             | 0.0007   | 0.0007        | -0.01         |
| C9-204°C                            | 0.0025   | 0.0025        | -0.01         |
| 204-288°C PGO                       | 0.1275   | 0.1275        | -0.01         |
| 288°C plus PFO                      | 0.3902   | 0.3902        | -0.01         |
| Steam/Water                         | 0.2191   | 0.2191        | -0.01         |
| <b>Operation Condition</b>          |          |               |               |
| Temperature (°C)                    | 193.70   | 193.70        | 0.00          |
| Pressure (Kg/cm <sup>2</sup> gauge) | 0.83     | 0.83          | 0.00          |
| Molar Flow (kgmole/h)               | 17977.87 | 17979.00      | 0.01          |

**Simulation Report – ECC 860 KTA**  
**Working Stage 6**

|                                     |            |               |               |
|-------------------------------------|------------|---------------|---------------|
| Mass Flow (kg/h)                    | 2824355.00 | 2824355.00    | 0.00          |
| Molecular Weight                    | 157.10     | 157.09        | -0.01         |
| Total                               | 1.0000     | 0.9999        |               |
| <b>2115</b>                         |            | <b>Design</b> | <b>%Error</b> |
| <b>Component (%mol)</b>             |            |               |               |
| Hydrogen                            | 0.0002     | 0.0002        | -9.93         |
| Carbon Monoxide                     | 0.0000     | 0.0000        | #DIV/0!       |
| Carbon Dioxide                      | 0.0000     | 0.0000        | #DIV/0!       |
| Hydrogen Sulphide                   | 0.0000     | 0.0000        |               |
| Methane                             | 0.0008     | 0.0008        | -5.35         |
| Acetylene                           | 0.0000     | 0.0000        | #DIV/0!       |
| Ethylene                            | 0.0016     | 0.0002        | -717.66       |
| Ethane                              | 0.0003     | 0.0001        | -245.50       |
| Propadiene/Propyne                  | 0.0001     | 0.0001        | 39.01         |
| Propylene                           | 0.0012     | 0.0006        | -94.86        |
| Propane                             | 0.0000     | 0.0000        | #DIV/0!       |
| Butadienes/C4Acetylenes             | 0.0004     | 0.0004        | -5.06         |
| Butylenes                           | 0.0006     | 0.0004        | -42.92        |
| Butanes                             | 0.0002     | 0.0001        | -104.38       |
| C5-Hydrocarbons                     | 0.0006     | 0.0005        | -17.21        |
| C6 Non-Aromatics                    | 0.0004     | 0.0003        | -20.58        |
| C7 Non-Aromatics                    | 0.0003     | 0.0002        | -29.77        |
| C8 Non-Aromatics                    | 0.0002     | 0.0001        | -68.16        |
| Benzene                             | 0.0014     | 0.0019        | 24.27         |
| Toluene                             | 0.0018     | 0.0023        | 19.91         |
| Xylenes/Ethylbenzene                | 0.0007     | 0.0008        | 15.71         |
| Styrene                             | 0.0005     | 0.0006        | 24.81         |
| C9-204°C                            | 0.0025     | 0.0028        | 11.33         |
| 204-288°C PGO                       | 0.2371     | 0.2411        | 1.65          |
| 288°C plus PFO                      | 0.7446     | 0.7402        | -0.60         |
| Steam/Water                         | 0.0044     | 0.0062        | 28.34         |
| <b>Operation Condition</b>          |            |               |               |
| Temperature (°C)                    | 155.00     | 155.0000      | 0.00          |
| Pressure (Kg/cm <sup>2</sup> gauge) | 3.48       | 3.4800        | 0.00          |
| Molar Flow (kgmole/h)               | 1668.48    | 1673.4000     | 0.29          |
| Mass Flow (kg/h)                    | 463132.00  | 463132.0000   | 0.00          |
| Molecular Weight                    | 277.58     | 276.7600      | -0.29         |
| Total                               | 1.0000     | 0.9999        |               |

|                         |        |               |               |
|-------------------------|--------|---------------|---------------|
| <b>2105</b>             |        | <b>Design</b> | <b>%Error</b> |
| <b>Component (%mol)</b> |        |               |               |
| Hydrogen                | 0.0555 | 0.0570        | 2.55          |
| Carbon Monoxide         | 0.0005 | 0.0004        | -15.24        |

**Simulation Report – ECC 860 KTA**  
**Working Stage 6**

|                                     |          |          |         |
|-------------------------------------|----------|----------|---------|
| Carbon Dioxide                      | 0.0002   | 0.0002   | 23.10   |
| Hydrogen Sulphide                   | 0.0000   | 0.0000   |         |
| Methane                             | 0.1200   | 0.1232   | 2.56    |
| Acetylene                           | 0.0024   | 0.0024   | 0.66    |
| Ethylene                            | 0.1221   | 0.1252   | 2.51    |
| Ethane                              | 0.0152   | 0.0155   | 2.14    |
| Propadiene/Propyne                  | 0.0022   | 0.0023   | 2.82    |
| Propylene                           | 0.0492   | 0.0504   | 2.34    |
| Propane                             | 0.0013   | 0.0013   | -0.80   |
| Butadienes/C4Acetylenes             | 0.0096   | 0.0099   | 3.21    |
| Butylenes                           | 0.0134   | 0.0137   | 2.44    |
| Butanes                             | 0.0044   | 0.0045   | 2.08    |
| C5-Hydrocarbons                     | 0.0078   | 0.0080   | 2.88    |
| C6 Non-Aromatics                    | 0.0025   | 0.0026   | 2.94    |
| C7 Non-Aromatics                    | 0.0011   | 0.0011   | 4.41    |
| C8 Non-Aromatics                    | 0.0004   | 0.0004   | -6.08   |
| Benzene                             | 0.0095   | 0.0097   | 2.18    |
| Toluene                             | 0.0067   | 0.0069   | 2.84    |
| Xylenes/Ethylbenzene                | 0.0014   | 0.0014   | -0.79   |
| Styrene                             | 0.0009   | 0.0009   | 0.62    |
| C9-204°C                            | 0.0109   | 0.0035   | -210.92 |
| 204-288°C PGO                       | 0.0493   | 0.0280   | -75.90  |
| 288°C plus PFO                      | 0.0118   | 0.0163   | 27.50   |
| Steam/Water                         | 0.5018   | 0.5151   | 2.57    |
| <b>Operation Condition</b>          |          |          |         |
| Temperature (°C)                    | 229.65   | 280.80   | 18.21   |
| Pressure (Kg/cm <sup>2</sup> gauge) | 0.85     | 0.85     | 0.00    |
| Molar Flow (kgmole/h)               | 1069.02  | 1039.50  | -2.84   |
| Mass Flow (kg/h)                    | 36910.16 | 32122.00 | -14.91  |
| Molecular Weight                    | 34.53    | 30.90    | -11.74  |
| Total                               | 1.0000   | 0.9999   |         |

| 2101                    |        | Design | %Error |
|-------------------------|--------|--------|--------|
| <b>Component (%mol)</b> |        |        |        |
| Hydrogen                | 0.0750 | 0.0754 | 0.54   |
| Carbon Monoxide         | 0.0004 | 0.0005 | 11.92  |
| Carbon Dioxide          | 0.0002 | 0.0002 | -1.49  |
| Hydrogen Sulphide       | 0.0000 | 0.0000 |        |
| Methane                 | 0.1304 | 0.1311 | 0.50   |
| Acetylene               | 0.0026 | 0.0027 | 2.45   |
| Ethylene                | 0.1438 | 0.1460 | 1.50   |
| Ethane                  | 0.0252 | 0.0256 | 1.62   |
| Propadiene/Propyne      | 0.0024 | 0.0024 | -0.74  |

**Simulation Report – ECC 860 KTA**  
**Working Stage 6**

|                                     |           |           |         |
|-------------------------------------|-----------|-----------|---------|
| Propylene                           | 0.0520    | 0.0528    | 1.51    |
| Propane                             | 0.0015    | 0.0016    | 3.65    |
| Butadienes/C4Acetylenes             | 0.0106    | 0.0107    | 1.13    |
| Butylenes                           | 0.0142    | 0.0144    | 1.57    |
| Butanes                             | 0.0046    | 0.0047    | 2.03    |
| C5-Hydrocarbons                     | 0.0083    | 0.0085    | 2.04    |
| C6 Non-Aromatics                    | 0.0027    | 0.0029    | 5.74    |
| C7 Non-Aromatics                    | 0.0013    | 0.0013    | 1.83    |
| C8 Non-Aromatics                    | 0.0006    | 0.0007    | 8.22    |
| Benzene                             | 0.0122    | 0.0117    | -3.93   |
| Toluene                             | 0.0113    | 0.0109    | -3.81   |
| Xylenes/Ethylbenzene                | 0.0047    | 0.0046    | -2.28   |
| Styrene                             | 0.0044    | 0.0043    | -1.34   |
| C9-204°C                            | 0.0747    | 0.0751    | 0.53    |
| 204-288°C PGO                       | 0.0087    | 0.0032    | -171.21 |
| 288°C plus PFO                      | 0.0000    | 0.0000    |         |
| Steam/Water                         | 0.4081    | 0.4087    | 0.15    |
| <b>Operation Condition</b>          |           |           |         |
| Temperature (°C)                    | 111.40    | 111.40    | 0.00    |
| Pressure (Kg/cm <sup>2</sup> gauge) | 0.67      | 0.67      | 0.00    |
| Molar Flow (kgmole/h)               | 23989.21  | 23997.50  | 0.03    |
| Mass Flow (kg/h)                    | 779645.00 | 779645.00 | 0.00    |
| Molecular Weight                    | 33.11     | 32.49     | -1.92   |
| Total                               | 1.0000    | 1.0000    |         |

| 2110                    |        | Design | %Error  |
|-------------------------|--------|--------|---------|
| Component (%mol)        |        |        |         |
| Hydrogen                | 0.0002 | 0.0002 | -9.93   |
| Carbon Monoxide         | 0.0000 | 0.0000 |         |
| Carbon Dioxide          | 0.0000 | 0.0000 |         |
| Hydrogen Sulphide       | 0.0000 | 0.0000 |         |
| Methane                 | 0.0008 | 0.0008 | -5.35   |
| Acetylene               | 0.0000 | 0.0000 |         |
| Ethylene                | 0.0016 | 0.0002 | -717.66 |
| Ethane                  | 0.0003 | 0.0001 | -245.50 |
| Propadiene/Propyne      | 0.0001 | 0.0001 | 39.01   |
| Propylene               | 0.0012 | 0.0006 | -94.86  |
| Propane                 | 0.0000 | 0.0000 |         |
| Butadienes/C4Acetylenes | 0.0004 | 0.0004 | -5.06   |
| Butylenes               | 0.0006 | 0.0004 | -42.92  |
| Butanes                 | 0.0002 | 0.0001 | -104.38 |
| C5-Hydrocarbons         | 0.0006 | 0.0005 | -17.21  |
| C6 Non-Aromatics        | 0.0004 | 0.0003 | -20.58  |

**Simulation Report – ECC 860 KTA**  
**Working Stage 6**

|                                     |            |            |        |
|-------------------------------------|------------|------------|--------|
| C7 Non-Aromatics                    | 0.0003     | 0.0002     | -29.77 |
| C8 Non-Aromatics                    | 0.0002     | 0.0001     | -68.17 |
| Benzene                             | 0.0014     | 0.0019     | 24.27  |
| Toluene                             | 0.0018     | 0.0023     | 19.90  |
| Xylenes/Ethylbenzene                | 0.0007     | 0.0008     | 15.70  |
| Styrene                             | 0.0005     | 0.0006     | 24.81  |
| C9-204°C                            | 0.0025     | 0.0028     | 11.32  |
| 204-288°C PGO                       | 0.2371     | 0.2411     | 1.64   |
| 288°C plus PFO                      | 0.7446     | 0.7402     | -0.60  |
| Steam/Water                         | 0.0044     | 0.0062     | 28.34  |
| <b>Operation Condition</b>          |            |            |        |
| Temperature (°C)                    | 193.28     | 193.30     | 0.01   |
| Pressure (Kg/cm <sup>2</sup> gauge) | 12.42      | 11.27      | -10.20 |
| Molar Flow (kgmole/h)               | 27390.10   | 27553.30   | 0.59   |
| Mass Flow (kg/h)                    | 7602808.79 | 7625534.00 | 0.30   |
| Molecular Weight                    | 277.58     | 276.76     | -0.29  |
| Total                               | 1.0000     | 0.9999     |        |

| 2030                    |        | Design | %Error |
|-------------------------|--------|--------|--------|
| <b>Component (%mol)</b> |        |        |        |
| Hydrogen                | 0.0723 | 0.0723 | -0.01  |
| Carbon Monoxide         | 0.0006 | 0.0006 | -0.01  |
| Carbon Dioxide          | 0.0002 | 0.0002 | -0.01  |
| Hydrogen Sulphide       | 0.0000 | 0.0000 |        |
| Methane                 | 0.1562 | 0.1562 | -0.01  |
| Acetylene               | 0.0031 | 0.0031 | -0.01  |
| Ethylene                | 0.1587 | 0.1587 | -0.01  |
| Ethane                  | 0.0197 | 0.0197 | -0.01  |
| Propadiene/Propyne      | 0.0029 | 0.0029 | -0.01  |
| Propylene               | 0.0639 | 0.0639 | -0.01  |
| Propane                 | 0.0017 | 0.0017 | -0.01  |
| Butadienes/C4Acetylenes | 0.0124 | 0.0124 | -0.01  |
| Butylenes               | 0.0173 | 0.0173 | -0.01  |
| Butanes                 | 0.0057 | 0.0057 | -0.01  |
| C5-Hydrocarbons         | 0.0100 | 0.0100 | -0.01  |
| C6 Non-Aromatics        | 0.0032 | 0.0032 | -0.01  |
| C7 Non-Aromatics        | 0.0013 | 0.0013 | -0.01  |
| C8 Non-Aromatics        | 0.0005 | 0.0005 | -0.01  |
| Benzene                 | 0.0120 | 0.0120 | -0.01  |
| Toluene                 | 0.0082 | 0.0082 | -0.01  |
| Xylenes/Ethylbenzene    | 0.0016 | 0.0016 | -0.01  |
| Styrene                 | 0.0010 | 0.0010 | -0.01  |
| C9-204°C                | 0.0023 | 0.0023 | -0.01  |

**Simulation Report – ECC 860 KTA**  
**Working Stage 6**

|                                     |          |          |       |
|-------------------------------------|----------|----------|-------|
| 204-288°C PGO                       | 0.0010   | 0.0012   | 16.66 |
| 288°C plus PFO                      | 0.0010   | 0.0010   | -0.01 |
| Steam/Water                         | 0.4431   | 0.4431   | -0.01 |
| <b>Operation Condition</b>          |          |          |       |
| Temperature (°C)                    | 372.00   | 372.00   | 0.00  |
| Pressure (Kg/cm <sup>2</sup> gauge) | 0.92     | 0.92     | 0.00  |
| Molar Flow (kgmole/h)               | 820.93   | 819.80   | -0.14 |
| Mass Flow (kg/h)                    | 20159.00 | 20159.00 | 0.00  |
| Molecular Weight                    | 24.56    | 24.59    | 0.14  |
| Total                               | 1.0000   | 1.0001   |       |

| 2106                                |        | Design | %Error  |
|-------------------------------------|--------|--------|---------|
| <b>Component (%mol)</b>             |        |        |         |
| Hydrogen                            | 0.0000 | 0.0000 |         |
| Carbon Monoxide                     | 0.0000 | 0.0000 |         |
| Carbon Dioxide                      | 0.0000 | 0.0000 |         |
| Hydrogen Sulphide                   | 0.0000 | 0.0000 |         |
| Methane                             | 0.0000 | 0.0000 |         |
| Acetylene                           | 0.0000 | 0.0000 |         |
| Ethylene                            | 0.0000 | 0.0000 |         |
| Ethane                              | 0.0000 | 0.0000 |         |
| Propadiene/Propyne                  | 0.0000 | 0.0000 |         |
| Propylene                           | 0.0000 | 0.0000 |         |
| Propane                             | 0.0000 | 0.0000 |         |
| Butadienes/C4Acetylenes             | 0.0000 | 0.0000 |         |
| Butylenes                           | 0.0000 | 0.0000 |         |
| Butanes                             | 0.0000 | 0.0000 |         |
| C5-Hydrocarbons                     | 0.0000 | 0.0000 |         |
| C6 Non-Aromatics                    | 0.0000 | 0.0000 |         |
| C7 Non-Aromatics                    | 0.0000 | 0.0000 |         |
| C8 Non-Aromatics                    | 0.0000 | 0.0000 |         |
| Benzene                             | 0.0000 | 0.0000 |         |
| Toluene                             | 0.0000 | 0.0000 |         |
| Xylenes/Ethylbenzene                | 0.0000 | 0.0000 |         |
| Styrene                             | 0.0000 | 0.0000 |         |
| C9-204°C                            | 0.0000 | 0.0049 | 99.99   |
| 204-288°C PGO                       | 0.0043 | 0.5086 | 99.16   |
| 288°C plus PFO                      | 0.9844 | 0.4669 | -110.83 |
| Steam/Water                         | 0.0113 | 0.0195 | 41.88   |
| <b>Operation Condition</b>          |        |        |         |
| Temperature (°C)                    | 213.83 | 164.70 | -29.83  |
| Pressure (Kg/cm <sup>2</sup> gauge) | 1.05   | 1.05   | 0.00    |
| Molar Flow (kgmole/h)               | 33.98  | 62.30  | 45.46   |

**Simulation Report – ECC 860 KTA**  
**Working Stage 6**

|                                     |          |               |               |
|-------------------------------------|----------|---------------|---------------|
| Mass Flow (kg/h)                    | 10790.88 | 15557.00      | 30.64         |
| Molecular Weight                    | 317.56   | 249.53        | -27.26        |
| Total                               | 1.0000   | 0.9999        |               |
| <b>2112</b>                         |          | <b>Design</b> | <b>%Error</b> |
| <b>Component (%mol)</b>             |          |               |               |
| Hydrogen                            | 0.0000   | 0.0000        |               |
| Carbon Monoxide                     | 0.0000   | 0.0000        |               |
| Carbon Dioxide                      | 0.0000   | 0.0000        |               |
| Hydrogen Sulphide                   | 0.0000   | 0.0000        |               |
| Methane                             | 0.0000   | 0.0000        |               |
| Acetylene                           | 0.0000   | 0.0000        |               |
| Ethylene                            | 0.0000   | 0.0000        |               |
| Ethane                              | 0.0000   | 0.0000        |               |
| Propadiene/Propyne                  | 0.0000   | 0.0000        |               |
| Propylene                           | 0.0000   | 0.0000        |               |
| Propane                             | 0.0000   | 0.0000        |               |
| Butadienes/C4Acetylenes             | 0.0000   | 0.0000        |               |
| Butylenes                           | 0.0000   | 0.0000        |               |
| Butanes                             | 0.0000   | 0.0000        |               |
| C5-Hydrocarbons                     | 0.0000   | 0.0000        |               |
| C6 Non-Aromatics                    | 0.0000   | 0.0000        |               |
| C7 Non-Aromatics                    | 0.0000   | 0.0000        |               |
| C8 Non-Aromatics                    | 0.0000   | 0.0000        |               |
| Benzene                             | 0.0000   | 0.0000        |               |
| Toluene                             | 0.0000   | 0.0000        |               |
| Xylenes/Ethylbenzene                | 0.0000   | 0.0000        |               |
| Styrene                             | 0.0000   | 0.0000        |               |
| C9-204°C                            | 0.0048   | 0.0049        | 2.01          |
| 204-288°C PGO                       | 0.5087   | 0.5086        | -0.01         |
| 288°C plus PFO                      | 0.4670   | 0.4669        | -0.03         |
| Steam/Water                         | 0.0195   | 0.0195        | -0.03         |
| <b>Operation Condition</b>          |          |               |               |
| Temperature (°C)                    | 165.10   | 165.10        | 0.00          |
| Pressure (Kg/cm <sup>2</sup> gauge) | 8.43     | 8.43          | 0.00          |
| Molar Flow (kgmole/h)               | 20.03    | 20.00         | -0.17         |
| Mass Flow (kg/h)                    | 5000.00  | 5000.00       | 0.00          |
| Molecular Weight                    | 249.57   | 249.53        | -0.02         |
| Total                               | 1.0000   | 0.9999        |               |

|                         |        |               |               |
|-------------------------|--------|---------------|---------------|
| <b>2130</b>             |        | <b>Design</b> | <b>%Error</b> |
| <b>Component (%mol)</b> |        |               |               |
| Hydrogen                | 0.0001 | 0.0001        | -38.47        |
| Carbon Monoxide         | 0.0000 | 0.0000        |               |



**Simulation Report – ECC 860 KTA**  
**Working Stage 6**

|                                     |         |         |         |
|-------------------------------------|---------|---------|---------|
| Carbon Dioxide                      | 0.0000  | 0.0000  |         |
| Hydrogen Sulphide                   | 0.0000  | 0.0000  |         |
| Methane                             | 0.0008  | 0.0007  | -8.85   |
| Acetylene                           | 0.0000  | 0.0000  |         |
| Ethylene                            | 0.0019  | 0.0006  | -210.70 |
| Ethane                              | 0.0004  | 0.0002  | -110.41 |
| Propadiene/Propyne                  | 0.0001  | 0.0001  | 3.51    |
| Propylene                           | 0.0017  | 0.0010  | -71.96  |
| Propane                             | 0.0001  | 0.0000  |         |
| Butadienes/C4Acetylenes             | 0.0008  | 0.0006  | -27.66  |
| Butylenes                           | 0.0010  | 0.0006  | -70.60  |
| Butanes                             | 0.0004  | 0.0002  | -88.11  |
| C5-Hydrocarbons                     | 0.0012  | 0.0008  | -54.49  |
| C6 Non-Aromatics                    | 0.0010  | 0.0006  | -66.25  |
| C7 Non-Aromatics                    | 0.0008  | 0.0005  | -68.58  |
| C8 Non-Aromatics                    | 0.0007  | 0.0004  | -69.23  |
| Benzene                             | 0.0042  | 0.0041  | -2.13   |
| Toluene                             | 0.0066  | 0.0059  | -12.53  |
| Xylenes/Ethylbenzene                | 0.0032  | 0.0023  | -37.65  |
| Styrene                             | 0.0022  | 0.0018  | -23.16  |
| C9-204°C                            | 0.1986  | 0.0380  | -422.73 |
| 204-288°C PGO                       | 0.-7694 | 0.9289  | 17.17   |
| 288°C plus PFO                      | 0.0000  | 0.0031  | 99.95   |
| Steam/Water                         | 0.0047  | 0.0095  | 50.60   |
| <b>Operation Condition</b>          |         |         |         |
| Temperature (°C)                    | 131.10  | 143.20  | 8.45    |
| Pressure (Kg/cm <sup>2</sup> gauge) | 0.72    | 0.74    | 2.14    |
| Molar Flow (kgmole/h)               | 52.90   | 52.70   | -0.37   |
| Mass Flow (kg/h)                    | 8201.57 | 8200.00 | -0.02   |
| Molecular Weight                    | 155.05  | 155.63  | 0.37    |
| Total                               | 1.0000  | 1.0000  |         |

| 2102                    |        | Design | %Error  |
|-------------------------|--------|--------|---------|
| <b>Component (%mol)</b> |        |        |         |
| Hydrogen                | 0.0002 | 0.0002 | -9.93   |
| Carbon Monoxide         | 0.0000 | 0.0000 |         |
| Carbon Dioxide          | 0.0000 | 0.0000 |         |
| Hydrogen Sulphide       | 0.0000 | 0.0000 |         |
| Methane                 | 0.0008 | 0.0008 | -5.35   |
| Acetylene               | 0.0000 | 0.0000 |         |
| Ethylene                | 0.0016 | 0.0002 | -717.66 |
| Ethane                  | 0.0003 | 0.0001 | -245.50 |
| Propadiene/Propyne      | 0.0001 | 0.0001 | 39.01   |

**Simulation Report – ECC 860 KTA**  
**Working Stage 6**

|                                     |            |            |         |
|-------------------------------------|------------|------------|---------|
| Propylene                           | 0.0012     | 0.0006     | -94.86  |
| Propane                             | 0.0000     | 0.0000     |         |
| Butadienes/C4Acetylenes             | 0.0004     | 0.0004     | -5.06   |
| Butylenes                           | 0.0006     | 0.0004     | -42.92  |
| Butanes                             | 0.0002     | 0.0001     | -104.38 |
| C5-Hydrocarbons                     | 0.0006     | 0.0005     | -17.21  |
| C6 Non-Aromatics                    | 0.0004     | 0.0003     | -20.58  |
| C7 Non-Aromatics                    | 0.0003     | 0.0002     | -29.77  |
| C8 Non-Aromatics                    | 0.0002     | 0.0001     | -68.17  |
| Benzene                             | 0.0014     | 0.0019     | 24.27   |
| Toluene                             | 0.0018     | 0.0023     | 19.90   |
| Xylenes/Ethylbenzene                | 0.0007     | 0.0008     | 15.70   |
| Styrene                             | 0.0005     | 0.0006     | 24.81   |
| C9-204°C                            | 0.0025     | 0.0028     | 11.32   |
| 204-288°C PGO                       | 0.2371     | 0.2411     | 1.64    |
| 288°C plus PFO                      | 0.7446     | 0.7402     | -0.60   |
| Steam/Water                         | 0.0044     | 0.0062     | 28.34   |
| <b>Operation Condition</b>          |            |            |         |
| Temperature (°C)                    | 192.95     | 193.00     | 0.03    |
| Pressure (Kg/cm <sup>2</sup> gauge) | 0.81       | 0.81       | 0.00    |
| Molar Flow (kgmole/h)               | 27450.88   | 27614.30   | 0.59    |
| Mass Flow (kg/h)                    | 7619680.79 | 7642406.00 | 0.30    |
| Molecular Weight                    | 277.58     | 276.76     | -0.29   |
| Total                               | 1.0000     | 0.9999     |         |

| 2104                    |        | Design | %Error  |
|-------------------------|--------|--------|---------|
| <b>Component (%mol)</b> |        |        |         |
| Hydrogen                | 0.0002 | 0.0002 | -9.93   |
| Carbon Monoxide         | 0.0000 | 0.0000 |         |
| Carbon Dioxide          | 0.0000 | 0.0000 |         |
| Hydrogen Sulphide       | 0.0000 | 0.0000 |         |
| Methane                 | 0.0008 | 0.0008 | -5.35   |
| Acetylene               | 0.0000 | 0.0000 |         |
| Ethylene                | 0.0016 | 0.0002 | -717.66 |
| Ethane                  | 0.0003 | 0.0001 | -245.50 |
| Propadiene/Propyne      | 0.0001 | 0.0001 | 39.01   |
| Propylene               | 0.0012 | 0.0006 | -94.86  |
| Propane                 | 0.0000 | 0.0000 |         |
| Butadienes/C4Acetylenes | 0.0004 | 0.0004 | -5.06   |
| Butylenes               | 0.0006 | 0.0004 | -42.92  |
| Butanes                 | 0.0002 | 0.0001 | -104.38 |
| C5-Hydrocarbons         | 0.0006 | 0.0005 | -17.21  |
| C6 Non-Aromatics        | 0.0004 | 0.0003 | -20.58  |

**Simulation Report – ECC 860 KTA**  
**Working Stage 6**

|                                     |          |          |        |
|-------------------------------------|----------|----------|--------|
| C7 Non-Aromatics                    | 0.0003   | 0.0002   | -29.77 |
| C8 Non-Aromatics                    | 0.0002   | 0.0001   | -68.17 |
| Benzene                             | 0.0014   | 0.0019   | 24.27  |
| Toluene                             | 0.0018   | 0.0023   | 19.90  |
| Xylenes/Ethylbenzene                | 0.0007   | 0.0008   | 15.70  |
| Styrene                             | 0.0005   | 0.0006   | 24.81  |
| C9-204°C                            | 0.0025   | 0.0028   | 11.32  |
| 204-288°C PGO                       | 0.2371   | 0.2411   | 1.64   |
| 288°C plus PFO                      | 0.7446   | 0.7402   | -0.60  |
| Steam/Water                         | 0.0044   | 0.0062   | 28.34  |
| <b>Operation Condition</b>          |          |          |        |
| Temperature (°C)                    | 193.28   | 193.30   | 0.01   |
| Pressure (Kg/cm <sup>2</sup> gauge) | 12.42    | 11.27    | -10.20 |
| Molar Flow (kgmole/h)               | 60.78    | 61.00    | 0.35   |
| Mass Flow (kg/h)                    | 16872.00 | 16872.00 | 0.00   |
| Molecular Weight                    | 277.58   | 276.76   | -0.29  |
| Total                               | 1.0000   | 0.9999   |        |

| 2125                    |        | Design | %Error |
|-------------------------|--------|--------|--------|
| <b>Component (%mol)</b> |        |        |        |
| Hydrogen                | 0.0673 | 0.0673 | -0.06  |
| Carbon Monoxide         | 0.0006 | 0.0005 | -11.76 |
| Carbon Dioxide          | 0.0002 | 0.0002 | 6.82   |
| Hydrogen Sulphide       | 0.0000 | 0.0000 |        |
| Methane                 | 0.1455 | 0.1454 | -0.07  |
| Acetylene               | 0.0029 | 0.0029 | 0.39   |
| Ethylene                | 0.1479 | 0.1477 | -0.13  |
| Ethane                  | 0.0184 | 0.0183 | -0.37  |
| Propadiene/Propyne      | 0.0027 | 0.0027 | -0.17  |
| Propylene               | 0.0596 | 0.0595 | -0.14  |
| Propane                 | 0.0016 | 0.0016 | 0.90   |
| Butadienes/C4Acetylenes | 0.0116 | 0.0116 | 0.21   |
| Butylenes               | 0.0161 | 0.0162 | 0.32   |
| Butanes                 | 0.0053 | 0.0053 | -0.41  |
| C5-Hydrocarbons         | 0.0094 | 0.0093 | -0.56  |
| C6 Non-Aromatics        | 0.0030 | 0.0030 | -0.15  |
| C7 Non-Aromatics        | 0.0012 | 0.0013 | 5.51   |
| C8 Non-Aromatics        | 0.0005 | 0.0005 | 4.57   |
| Benzene                 | 0.0113 | 0.0113 | 0.24   |
| Toluene                 | 0.0078 | 0.0078 | 0.48   |
| Xylenes/Ethylbenzene    | 0.0015 | 0.0016 | 3.98   |
| Styrene                 | 0.0010 | 0.0009 | -6.92  |
| C9-204°C                | 0.0023 | 0.0023 | -0.56  |

**Simulation Report – ECC 860 KTA**  
**Working Stage 6**

|                                     |          |          |       |
|-------------------------------------|----------|----------|-------|
| 204-288°C PGO                       | 0.0173   | 0.0178   | 2.93  |
| 288°C plus PFO                      | 0.0523   | 0.0522   | -0.12 |
| Steam/Water                         | 0.4129   | 0.4129   | 0.00  |
| <b>Operation Condition</b>          |          |          |       |
| Temperature (°C)                    | 258.68   | 273.30   | 5.35  |
| Pressure (Kg/cm <sup>2</sup> gauge) | 0.92     | 0.91     | -1.10 |
| Molar Flow (kgmole/h)               | 881.72   | 880.80   | -0.10 |
| Mass Flow (kg/h)                    | 37031.00 | 37031.00 | 0.00  |
| Molecular Weight                    | 42.00    | 42.05    | 0.12  |
| Total                               | 1.0000   | 1.0001   |       |

| 2107                                |        | Design | %Error  |
|-------------------------------------|--------|--------|---------|
| <b>Component (%mol)</b>             |        |        |         |
| Hydrogen                            | 0.0000 | 0.0000 |         |
| Carbon Monoxide                     | 0.0000 | 0.0000 |         |
| Carbon Dioxide                      | 0.0000 | 0.0000 |         |
| Hydrogen Sulphide                   | 0.0000 | 0.0000 |         |
| Methane                             | 0.0000 | 0.0000 |         |
| Acetylene                           | 0.0000 | 0.0000 |         |
| Ethylene                            | 0.0000 | 0.0000 |         |
| Ethane                              | 0.0000 | 0.0000 |         |
| Propadiene/Propyne                  | 0.0000 | 0.0000 |         |
| Propylene                           | 0.0000 | 0.0000 |         |
| Propane                             | 0.0000 | 0.0000 |         |
| Butadienes/C4Acetylenes             | 0.0000 | 0.0000 |         |
| Butylenes                           | 0.0000 | 0.0000 |         |
| Butanes                             | 0.0000 | 0.0000 |         |
| C5-Hydrocarbons                     | 0.0000 | 0.0000 |         |
| C6 Non-Aromatics                    | 0.0000 | 0.0000 |         |
| C7 Non-Aromatics                    | 0.0000 | 0.0000 |         |
| C8 Non-Aromatics                    | 0.0000 | 0.0000 |         |
| Benzene                             | 0.0000 | 0.0000 |         |
| Toluene                             | 0.0000 | 0.0000 |         |
| Xylenes/Ethylbenzene                | 0.0000 | 0.0000 |         |
| Styrene                             | 0.0000 | 0.0000 |         |
| C9-204°C                            | 0.0000 | 0.0049 | 99.99   |
| 204-288°C PGO                       | 0.0043 | 0.5086 | 99.16   |
| 288°C plus PFO                      | 0.9844 | 0.4669 | -110.83 |
| Steam/Water                         | 0.0113 | 0.0195 | 41.88   |
| <b>Operation Condition</b>          |        |        |         |
| Temperature (°C)                    | 214.03 | 165.10 | -29.64  |
| Pressure (Kg/cm <sup>2</sup> gauge) | 8.43   | 8.43   | 0.00    |
| Molar Flow (kgmole/h)               | 33.98  | 62.30  | 45.46   |

**Simulation Report – ECC 860 KTA**  
**Working Stage 6**

|                                     |           |               |               |
|-------------------------------------|-----------|---------------|---------------|
| Mass Flow (kg/h)                    | 10790.88  | 15557.00      | 30.64         |
| Molecular Weight                    | 317.56    | 249.53        | -27.26        |
| Total                               | 1.0000    | 0.9999        |               |
| <b>2120</b>                         |           | <b>Design</b> | <b>%Error</b> |
| <b>Component (%mol)</b>             |           |               |               |
| Hydrogen                            | 0.0000    | 0.0000        |               |
| Carbon Monoxide                     | 0.0000    | 0.0000        |               |
| Carbon Dioxide                      | 0.0000    | 0.0000        |               |
| Hydrogen Sulphide                   | 0.0000    | 0.0000        |               |
| Methane                             | 0.0006    | 0.0006        | -0.02         |
| Acetylene                           | 0.0001    | 0.0001        | -0.02         |
| Ethylene                            | 0.0018    | 0.0018        | -0.02         |
| Ethane                              | 0.0005    | 0.0005        | -0.02         |
| Propadiene/Propyne                  | 0.0004    | 0.0004        | -0.02         |
| Propylene                           | 0.0030    | 0.0030        | -0.02         |
| Propane                             | 0.0001    | 0.0001        | -0.02         |
| Butadienes/C4Acetylenes             | 0.0026    | 0.0026        | -0.02         |
| Butylenes                           | 0.0026    | 0.0026        | -0.02         |
| Butanes                             | 0.0008    | 0.0008        | -0.02         |
| C5-Hydrocarbons                     | 0.0027    | 0.0027        | -0.02         |
| C6 Non-Aromatics                    | 0.0021    | 0.0021        | -0.02         |
| C7 Non-Aromatics                    | 0.0022    | 0.0022        | -0.02         |
| C8 Non-Aromatics                    | 0.0026    | 0.0026        | -0.02         |
| Benzene                             | 0.0206    | 0.0206        | -0.02         |
| Toluene                             | 0.0450    | 0.0450        | -0.02         |
| Xylenes/Ethylbenzene                | 0.0355    | 0.0355        | -0.02         |
| Styrene                             | 0.0375    | 0.0375        | -0.02         |
| C9-204°C                            | 0.7906    | 0.7904        | -0.02         |
| 204-288°C PGO                       | 0.0342    | 0.0343        | 0.27          |
| 288°C plus PFO                      | 0.0000    | 0.0000        |               |
| Steam/Water                         | 0.0145    | 0.0145        | -0.02         |
| <b>Operation Condition</b>          |           |               |               |
| Temperature (°C)                    | 85.40     | 85.40         | 0.00          |
| Pressure (Kg/cm <sup>2</sup> gauge) | 6.70      | 6.70          | 0.00          |
| Molar Flow (kgmole/h)               | 2224.22   | 2224.40       | 0.01          |
| Mass Flow (kg/h)                    | 267190.00 | 267190.00     | 0.00          |
| Molecular Weight                    | 120.13    | 120.12        | -0.01         |
| Total                               | 1.0000    | 0.9999        |               |

|                         |        |               |               |
|-------------------------|--------|---------------|---------------|
| <b>2103</b>             |        | <b>Design</b> | <b>%Error</b> |
| <b>Component (%mol)</b> |        |               |               |
| Hydrogen                | 0.0002 | 0.0002        | -9.93         |
| Carbon Monoxide         | 0.0000 | 0.0000        |               |

**Simulation Report – ECC 860 KTA**  
**Working Stage 6**

|                                     |            |            |         |
|-------------------------------------|------------|------------|---------|
| Carbon Dioxide                      | 0.0000     | 0.0000     |         |
| Hydrogen Sulphide                   | 0.0000     | 0.0000     |         |
| Methane                             | 0.0008     | 0.0008     | -5.35   |
| Acetylene                           | 0.0000     | 0.0000     |         |
| Ethylene                            | 0.0016     | 0.0002     | -717.66 |
| Ethane                              | 0.0003     | 0.0001     | -245.50 |
| Propadiene/Propyne                  | 0.0001     | 0.0001     | 39.01   |
| Propylene                           | 0.0012     | 0.0006     | -94.86  |
| Propane                             | 0.0000     | 0.0000     |         |
| Butadienes/C4Acetylenes             | 0.0004     | 0.0004     | -5.06   |
| Butylenes                           | 0.0006     | 0.0004     | -42.92  |
| Butanes                             | 0.0002     | 0.0001     | -104.38 |
| C5-Hydrocarbons                     | 0.0006     | 0.0005     | -17.21  |
| C6 Non-Aromatics                    | 0.0004     | 0.0003     | -20.58  |
| C7 Non-Aromatics                    | 0.0003     | 0.0002     | -29.77  |
| C8 Non-Aromatics                    | 0.0002     | 0.0001     | -68.17  |
| Benzene                             | 0.0014     | 0.0019     | 24.27   |
| Toluene                             | 0.0018     | 0.0023     | 19.90   |
| Xylenes/Ethylbenzene                | 0.0007     | 0.0008     | 15.70   |
| Styrene                             | 0.0005     | 0.0006     | 24.81   |
| C9-204°C                            | 0.0025     | 0.0028     | 11.32   |
| 204-288°C PGO                       | 0.2371     | 0.2411     | 1.64    |
| 288°C plus PFO                      | 0.7446     | 0.7402     | -0.60   |
| Steam/Water                         | 0.0044     | 0.0062     | 28.34   |
| <b>Operation Condition</b>          |            |            |         |
| Temperature (°C)                    | 193.28     | 193.20     | -0.04   |
| Pressure (Kg/cm <sup>2</sup> gauge) | 12.42      | 12.42      | 0.00    |
| Molar Flow (kgmole/h)               | 27450.88   | 27614.30   | 0.59    |
| Mass Flow (kg/h)                    | 7619680.79 | 7642406.00 | 0.30    |
| Molecular Weight                    | 277.58     | 276.76     | -0.29   |
| Total                               | 1.0000     | 0.9999     |         |

| 2109                    |        | Design | %Error  |
|-------------------------|--------|--------|---------|
| <b>Component (%mol)</b> |        |        |         |
| Hydrogen                | 0.0001 | 0.0001 | -38.47  |
| Carbon Monoxide         | 0.0000 | 0.0000 |         |
| Carbon Dioxide          | 0.0000 | 0.0000 |         |
| Hydrogen Sulphide       | 0.0000 | 0.0000 |         |
| Methane                 | 0.0008 | 0.0007 | -8.85   |
| Acetylene               | 0.0000 | 0.0000 | #DIV/0! |
| Ethylene                | 0.0019 | 0.0006 | -210.70 |
| Ethane                  | 0.0004 | 0.0002 | -110.41 |
| Propadiene/Propyne      | 0.0001 | 0.0001 | 3.51    |

**Simulation Report – ECC 860 KTA**  
**Working Stage 6**

|                                     |         |         |         |
|-------------------------------------|---------|---------|---------|
| Propylene                           | 0.0017  | 0.0010  | -71.96  |
| Propane                             | 0.0001  | 0.0000  |         |
| Butadienes/C4Acetylenes             | 0.0008  | 0.0006  | -27.66  |
| Butylenes                           | 0.0010  | 0.0006  | -70.60  |
| Butanes                             | 0.0004  | 0.0002  | -88.11  |
| C5-Hydrocarbons                     | 0.0012  | 0.0008  | -54.49  |
| C6 Non-Aromatics                    | 0.0010  | 0.0006  | -66.25  |
| C7 Non-Aromatics                    | 0.0008  | 0.0005  | -68.58  |
| C8 Non-Aromatics                    | 0.0007  | 0.0004  | -69.23  |
| Benzene                             | 0.0042  | 0.0041  | -2.13   |
| Toluene                             | 0.0066  | 0.0059  | -12.53  |
| Xylenes/Ethylbenzene                | 0.0032  | 0.0023  | -37.65  |
| Styrene                             | 0.0022  | 0.0018  | -23.16  |
| C9-204°C                            | 0.1986  | 0.0380  | -422.73 |
| 204-288°C PGO                       | 0.7694  | 0.9289  | 17.17   |
| 288°C plus PFO                      | 0.0000  | 0.0031  | 99.95   |
| Steam/Water                         | 0.0047  | 0.0095  | 50.60   |
| <b>Operation Condition</b>          |         |         |         |
| Temperature (°C)                    | 131.10  | 143.20  | 8.45    |
| Pressure (Kg/cm <sup>2</sup> gauge) | 0.72    | 0.74    | 2.14    |
| Molar Flow (kgmole/h)               | 48.76   | 48.60   | -0.34   |
| Mass Flow (kg/h)                    | 7561.00 | 7561.00 | 0.00    |
| Molecular Weight                    | 155.05  | 155.63  | 0.37    |
| Total                               | 1.0000  | 1.0000  |         |

| 2111                    |        | Design | %Error  |
|-------------------------|--------|--------|---------|
| <b>Component (%mol)</b> |        |        |         |
| Hydrogen                | 0.0002 | 0.0002 | -9.93   |
| Carbon Monoxide         | 0.0000 | 0.0000 |         |
| Carbon Dioxide          | 0.0000 | 0.0000 |         |
| Hydrogen Sulphide       | 0.0000 | 0.0000 |         |
| Methane                 | 0.0008 | 0.0008 | -5.35   |
| Acetylene               | 0.0000 | 0.0000 |         |
| Ethylene                | 0.0016 | 0.0002 | -717.66 |
| Ethane                  | 0.0003 | 0.0001 | -245.50 |
| Propadiene/Propyne      | 0.0001 | 0.0001 | 39.01   |
| Propylene               | 0.0012 | 0.0006 | -94.86  |
| Propane                 | 0.0000 | 0.0000 |         |
| Butadienes/C4Acetylenes | 0.0004 | 0.0004 | -5.06   |
| Butylenes               | 0.0006 | 0.0004 | -42.92  |
| Butanes                 | 0.0002 | 0.0001 | -104.38 |
| C5-Hydrocarbons         | 0.0006 | 0.0005 | -17.21  |
| C6 Non-Aromatics        | 0.0004 | 0.0003 | -20.58  |

**Simulation Report – ECC 860 KTA**  
**Working Stage 6**

|                                     |            |            |        |
|-------------------------------------|------------|------------|--------|
| C7 Non-Aromatics                    | 0.0003     | 0.0002     | -29.77 |
| C8 Non-Aromatics                    | 0.0002     | 0.0001     | -68.17 |
| Benzene                             | 0.0014     | 0.0019     | 24.27  |
| Toluene                             | 0.0018     | 0.0023     | 19.90  |
| Xylenes/Ethylbenzene                | 0.0007     | 0.0008     | 15.70  |
| Styrene                             | 0.0005     | 0.0006     | 24.81  |
| C9-204°C                            | 0.0025     | 0.0028     | 11.32  |
| 204-288°C PGO                       | 0.2371     | 0.2411     | 1.64   |
| 288°C plus PFO                      | 0.7446     | 0.7402     | -0.60  |
| Steam/Water                         | 0.0044     | 0.0062     | 28.34  |
| <b>Operation Condition</b>          |            |            |        |
| Temperature (°C)                    | 178.50     | 178.50     | 0.00   |
| Pressure (Kg/cm <sup>2</sup> gauge) | 8.92       | 8.92       | 0.00   |
| Molar Flow (kgmole/h)               | 27390.10   | 27553.30   | 0.59   |
| Mass Flow (kg/h)                    | 7602808.79 | 7625534.00 | 0.30   |
| Molecular Weight                    | 277.58     | 276.76     | -0.29  |
| Total                               | 1.0000     | 0.9999     |        |

| 2116                    |        | Design | %Error |
|-------------------------|--------|--------|--------|
| <b>Component (%mol)</b> |        |        |        |
| Hydrogen                | 0.0000 | 0.0000 |        |
| Carbon Monoxide         | 0.0000 | 0.0000 |        |
| Carbon Dioxide          | 0.0000 | 0.0000 |        |
| Hydrogen Sulphide       | 0.0000 | 0.0000 |        |
| Methane                 | 0.0000 | 0.0000 |        |
| Acetylene               | 0.0000 | 0.0000 |        |
| Ethylene                | 0.0000 | 0.0000 |        |
| Ethane                  | 0.0000 | 0.0000 |        |
| Propadiene/Propyne      | 0.0000 | 0.0000 |        |
| Propylene               | 0.0000 | 0.0000 |        |
| Propane                 | 0.0000 | 0.0000 |        |
| Butadienes/C4Acetylenes | 0.0000 | 0.0000 |        |
| Butylenes               | 0.0000 | 0.0000 |        |
| Butanes                 | 0.0000 | 0.0000 |        |
| C5-Hydrocarbons         | 0.0000 | 0.0000 |        |
| C6 Non-Aromatics        | 0.0000 | 0.0000 |        |
| C7 Non-Aromatics        | 0.0000 | 0.0000 |        |
| C8 Non-Aromatics        | 0.0000 | 0.0000 |        |
| Benzene                 | 0.0000 | 0.0000 |        |
| Toluene                 | 0.0000 | 0.0000 |        |
| Xylenes/Ethylbenzene    | 0.0000 | 0.0000 |        |
| Styrene                 | 0.0000 | 0.0000 |        |
| C9-204°C                | 0.0000 | 0.0000 |        |



**Simulation Report – ECC 860 KTA**  
**Working Stage 6**

|                                     |         |         |      |
|-------------------------------------|---------|---------|------|
| 204-288°C PGO                       | 0.0000  | 0.0000  |      |
| 288°C plus PFO                      | 0.0000  | 0.0000  |      |
| Steam/Water                         | 1.0000  | 1.0000  | 0.00 |
| <b>Operation Condition</b>          |         |         |      |
| Temperature (°C)                    | 195.00  | 195.00  | 0.00 |
| Pressure (Kg/cm <sup>2</sup> gauge) | 3.50    | 3.50    | 0.00 |
| Molar Flow (kgmole/h)               | 172.58  | 172.60  | 0.01 |
| Mass Flow (kg/h)                    | 3109.00 | 3109.00 | 0.00 |
| Molecular Weight                    | 18.02   | 18.02   | 0.03 |
| Total                               | 1.0000  | 1.0000  |      |

| 2108                                |        | Design | %Error  |
|-------------------------------------|--------|--------|---------|
| <b>Component (%mol)</b>             |        |        |         |
| Hydrogen                            | 0.0000 | 0.0000 |         |
| Carbon Monoxide                     | 0.0000 | 0.0000 |         |
| Carbon Dioxide                      | 0.0000 | 0.0000 |         |
| Hydrogen Sulphide                   | 0.0000 | 0.0000 |         |
| Methane                             | 0.0000 | 0.0000 |         |
| Acetylene                           | 0.0000 | 0.0000 |         |
| Ethylene                            | 0.0000 | 0.0000 |         |
| Ethane                              | 0.0000 | 0.0000 |         |
| Propadiene/Propyne                  | 0.0000 | 0.0000 |         |
| Propylene                           | 0.0000 | 0.0000 |         |
| Propane                             | 0.0000 | 0.0000 |         |
| Butadienes/C4Acetylenes             | 0.0000 | 0.0000 |         |
| Butylenes                           | 0.0000 | 0.0000 |         |
| Butanes                             | 0.0000 | 0.0000 |         |
| C5-Hydrocarbons                     | 0.0000 | 0.0000 |         |
| C6 Non-Aromatics                    | 0.0000 | 0.0000 |         |
| C7 Non-Aromatics                    | 0.0000 | 0.0000 |         |
| C8 Non-Aromatics                    | 0.0000 | 0.0000 |         |
| Benzene                             | 0.0000 | 0.0000 |         |
| Toluene                             | 0.0000 | 0.0000 |         |
| Xylenes/Ethylbenzene                | 0.0000 | 0.0000 |         |
| Styrene                             | 0.0000 | 0.0000 |         |
| C9-204°C                            | 0.0000 | 0.0049 | 99.99   |
| 204-288°C PGO                       | 0.0043 | 0.5086 | 99.16   |
| 288°C plus PFO                      | 0.9844 | 0.4669 | -110.83 |
| Steam/Water                         | 0.0113 | 0.0195 | 41.88   |
| <b>Operation Condition</b>          |        |        |         |
| Temperature (°C)                    | 80.00  | 80.00  | 0.00    |
| Pressure (Kg/cm <sup>2</sup> gauge) | 3.00   | 3.00   | 0.00    |
| Molar Flow (kgmole/h)               | 33.24  | 42.30  | 21.41   |

**Simulation Report – ECC 860 KTA**  
**Working Stage 6**

|                                     |           |               |               |
|-------------------------------------|-----------|---------------|---------------|
| Mass Flow (kg/h)                    | 10557.00  | 10557.00      | 0.00          |
| Molecular Weight                    | 317.56    | 249.53        | -27.26        |
| Total                               | 1.0000    | 0.9999        |               |
| <b>2101</b>                         |           | <b>Design</b> | <b>%Error</b> |
| <b>Component (%mol)</b>             |           |               |               |
| Hydrogen                            | 0.0750    | 0.0754        | 0.54          |
| Carbon Monoxide                     | 0.0004    | 0.0005        | 11.92         |
| Carbon Dioxide                      | 0.0002    | 0.0002        | -1.49         |
| Hydrogen Sulphide                   | 0.0000    | 0.0000        |               |
| Methane                             | 0.1304    | 0.1311        | 0.50          |
| Acetylene                           | 0.0026    | 0.0027        | 2.45          |
| Ethylene                            | 0.1438    | 0.1460        | 1.50          |
| Ethane                              | 0.0252    | 0.0256        | 1.62          |
| Propadiene/Propyne                  | 0.0024    | 0.0024        | -0.74         |
| Propylene                           | 0.0520    | 0.0528        | 1.51          |
| Propane                             | 0.0015    | 0.0016        | 3.65          |
| Butadienes/C4Acetylenes             | 0.0106    | 0.0107        | 1.13          |
| Butylenes                           | 0.0142    | 0.0144        | 1.57          |
| Butanes                             | 0.0046    | 0.0047        | 2.03          |
| C5-Hydrocarbons                     | 0.0083    | 0.0085        | 2.04          |
| C6 Non-Aromatics                    | 0.0027    | 0.0029        | 5.74          |
| C7 Non-Aromatics                    | 0.0013    | 0.0013        | 1.83          |
| C8 Non-Aromatics                    | 0.0006    | 0.0007        | 8.22          |
| Benzene                             | 0.0122    | 0.0117        | -3.93         |
| Toluene                             | 0.0113    | 0.0109        | -3.81         |
| Xylenes/Ethylbenzene                | 0.0047    | 0.0046        | -2.28         |
| Styrene                             | 0.0044    | 0.0043        | -1.34         |
| C9-204°C                            | 0.0747    | 0.0751        | 0.53          |
| 204-288°C PGO                       | 0.0087    | 0.0032        | -171.21       |
| 288°C plus PFO                      | 0.0000    | 0.0000        |               |
| Steam/Water                         | 0.4081    | 0.4087        | 0.15          |
| Nitrogen                            | 0.0000    | 0.0000        |               |
| Wash Gasoline                       | 0.0000    | 0.0000        |               |
| <b>Operation Condition</b>          |           |               |               |
| Temperature (°C)                    | 111.40    | 111.40        | 0.00          |
| Pressure (Kg/cm <sup>2</sup> gauge) | 0.67      | 0.67          | 0.00          |
| Molar Flow (kgmole/h)               | 23989.21  | 23997.50      | 0.03          |
| Mass Flow (kg/h)                    | 779645.00 | 779645.00     | 0.00          |
| Molecular Weight                    | 32.4998   | 32.49         | -0.03         |
| Total                               | 1.0000    | 1.0000        |               |

|                         |  |               |               |
|-------------------------|--|---------------|---------------|
| <b>2231</b>             |  | <b>Design</b> | <b>%Error</b> |
| <b>Component (%mol)</b> |  |               |               |

**Simulation Report – ECC 860 KTA**  
**Working Stage 6**

|                                     |            |            |      |
|-------------------------------------|------------|------------|------|
| Hydrogen                            | 0.0000     | 0.0000     |      |
| Carbon Monoxide                     | 0.0000     | 0.0000     |      |
| Carbon Dioxide                      | 0.0000     | 0.0000     |      |
| Hydrogen Sulphide                   | 0.0000     | 0.0000     |      |
| Methane                             | 0.0000     | 0.0000     |      |
| Acetylene                           | 0.0000     | 0.0000     |      |
| Ethylene                            | 0.0000     | 0.0000     |      |
| Ethane                              | 0.0000     | 0.0000     |      |
| Propadiene/Propyne                  | 0.0000     | 0.0000     |      |
| Propylene                           | 0.0000     | 0.0000     |      |
| Propane                             | 0.0000     | 0.0000     |      |
| Butadienes/C4Acetylenes             | 0.0000     | 0.0000     |      |
| Butylenes                           | 0.0000     | 0.0000     |      |
| Butanes                             | 0.0000     | 0.0000     |      |
| C5-Hydrocarbons                     | 0.0000     | 0.0000     |      |
| C6 Non-Aromatics                    | 0.0000     | 0.0000     |      |
| C7 Non-Aromatics                    | 0.0000     | 0.0000     |      |
| C8 Non-Aromatics                    | 0.0000     | 0.0000     |      |
| Benzene                             | 0.0000     | 0.0000     |      |
| Toluene                             | 0.0000     | 0.0000     |      |
| Xylenes/Ethylbenzene                | 0.0000     | 0.0000     |      |
| Styrene                             | 0.0000     | 0.0000     |      |
| C9-204°C                            | 0.0000     | 0.0000     |      |
| 204-288°C PGO                       | 0.0000     | 0.0000     |      |
| 288°C plus PFO                      | 0.0000     | 0.0000     |      |
| Steam/Water                         | 1.0000     | 1.0000     | 0.00 |
| Nitrogen                            | 0.0000     | 0.0000     |      |
| Wash Gasoline                       | 0.0000     | 0.0000     |      |
| <b>Operation Condition</b>          |            |            |      |
| Temperature (°C)                    | 67.16      | 67.50      | 0.51 |
| Pressure (Kg/cm <sup>2</sup> gauge) | 5.26       | 5.26       | 0.00 |
| Molar Flow (kgmole/h)               | 90677.15   | 90677.70   | 0.00 |
| Mass Flow (kg/h)                    | 1633558.00 | 1633558.00 | 0.00 |
| Molecular Weight                    | 18.0151    | 18.02      | 0.03 |
| Total                               | 1.0000     | 1.0000     |      |

| 2234              |        | Design | %Error |
|-------------------|--------|--------|--------|
| Component (%mol)  |        |        |        |
| Hydrogen          | 0.0000 | 0.0000 |        |
| Carbon Monoxide   | 0.0000 | 0.0000 |        |
| Carbon Dioxide    | 0.0000 | 0.0000 |        |
| Hydrogen Sulphide | 0.0000 | 0.0000 |        |
| Methane           | 0.0000 | 0.0000 |        |

**Simulation Report – ECC 860 KTA**  
**Working Stage 6**

|                                     |            |            |      |
|-------------------------------------|------------|------------|------|
| Acetylene                           | 0.0000     | 0.0000     |      |
| Ethylene                            | 0.0000     | 0.0000     |      |
| Ethane                              | 0.0000     | 0.0000     |      |
| Propadiene/Propyne                  | 0.0000     | 0.0000     |      |
| Propylene                           | 0.0000     | 0.0000     |      |
| Propane                             | 0.0000     | 0.0000     |      |
| Butadienes/C4Acetylenes             | 0.0000     | 0.0000     |      |
| Butylenes                           | 0.0000     | 0.0000     |      |
| Butanes                             | 0.0000     | 0.0000     |      |
| C5-Hydrocarbons                     | 0.0000     | 0.0000     |      |
| C6 Non-Aromatics                    | 0.0000     | 0.0000     |      |
| C7 Non-Aromatics                    | 0.0000     | 0.0000     |      |
| C8 Non-Aromatics                    | 0.0000     | 0.0000     |      |
| Benzene                             | 0.0000     | 0.0000     |      |
| Toluene                             | 0.0000     | 0.0000     |      |
| Xylenes/Ethylbenzene                | 0.0000     | 0.0000     |      |
| Styrene                             | 0.0000     | 0.0000     |      |
| C9-204°C                            | 0.0000     | 0.0000     |      |
| 204-288°C PGO                       | 0.0000     | 0.0000     |      |
| 288°C plus PFO                      | 0.0000     | 0.0000     |      |
| Steam/Water                         | 1.0000     | 1.0000     | 0.00 |
| Nitrogen                            | 0.0000     | 0.0000     |      |
| Wash Gasoline                       | 0.0000     | 0.0000     |      |
| <b>Operation Condition</b>          |            |            |      |
| Temperature (°C)                    | 56.98      | 57.00      | 0.04 |
| Pressure (Kg/cm <sup>2</sup> gauge) | 5.26       | 5.26       | 0.00 |
| Molar Flow (kgmole/h)               | 165787.47  | 167588.70  | 1.07 |
| Mass Flow (kg/h)                    | 2986678.00 | 3019110.00 | 1.07 |
| Molecular Weight                    | 18.0151    | 18.02      | 0.03 |
| Total                               | 1.0000     | 1.0000     |      |

| 3907               |        | Design | %Error |
|--------------------|--------|--------|--------|
| Component (%mol)   |        |        |        |
| Hydrogen           | 0.0000 | 0.0000 |        |
| Carbon Monoxide    | 0.0000 | 0.0000 |        |
| Carbon Dioxide     | 0.0000 | 0.0000 |        |
| Hydrogen Sulphide  | 0.0000 | 0.0000 |        |
| Methane            | 0.0000 | 0.0000 |        |
| Acetylene          | 0.0000 | 0.0000 |        |
| Ethylene           | 0.0000 | 0.0000 |        |
| Ethane             | 0.0000 | 0.0000 |        |
| Propadiene/Propyne | 0.0000 | 0.0000 |        |
| Propylene          | 0.0000 | 0.0000 |        |

**Simulation Report – ECC 860 KTA**  
**Working Stage 6**

|                                     |          |         |       |
|-------------------------------------|----------|---------|-------|
| Propane                             | 0.0000   | 0.0000  |       |
| Butadienes/C4Acetylenes             | 0.0000   | 0.0000  |       |
| Butylenes                           | 0.0000   | 0.0000  |       |
| Butanes                             | 0.0000   | 0.0000  |       |
| C5-Hydrocarbons                     | 0.0000   | 0.0000  |       |
| C6 Non-Aromatics                    | 0.0000   | 0.0000  |       |
| C7 Non-Aromatics                    | 0.0000   | 0.0000  |       |
| C8 Non-Aromatics                    | 0.0000   | 0.0000  |       |
| Benzene                             | 0.0000   | 0.0000  |       |
| Toluene                             | 0.0000   | 0.0000  |       |
| Xylenes/Ethylbenzene                | 0.0000   | 0.0000  |       |
| Styrene                             | 0.0000   | 0.0000  |       |
| C9-204°C                            | 0.0000   | 0.0000  |       |
| 204-288°C PGO                       | 0.0000   | 0.0000  |       |
| 288°C plus PFO                      | 0.0000   | 0.0000  |       |
| Steam/Water                         | 0.0000   | 0.0000  |       |
| Nitrogen                            | 0.0000   | 0.0000  |       |
| Wash Gasoline                       | 1.0000   | 1.0000  | 0.00  |
| <b>Operation Condition</b>          |          |         |       |
| Temperature (°C)                    | 119.90   | 119.90  | 0.00  |
| Pressure (Kg/cm <sup>2</sup> gauge) | 2.79     | 2.79    | 0.00  |
| Molar Flow (kgmole/h)               | 19.54    | 19.50   | -0.18 |
| Mass Flow (kg/h)                    | 2373.00  | 2373.00 | 0.00  |
| Molecular Weight                    | 121.4738 | 121.46  | -0.01 |
| Total                               | 1.0000   | 1.0000  |       |

| 2501                    |        | Design | %Error |
|-------------------------|--------|--------|--------|
| Component (%mol)        |        |        |        |
| Hydrogen                | 0.0000 | 0.0000 |        |
| Carbon Monoxide         | 0.0000 | 0.0000 |        |
| Carbon Dioxide          | 0.0000 | 0.0000 |        |
| Hydrogen Sulphide       | 0.0000 | 0.0000 |        |
| Methane                 | 0.0000 | 0.0000 |        |
| Acetylene               | 0.0000 | 0.0000 |        |
| Ethylene                | 0.0000 | 0.0000 |        |
| Ethane                  | 0.0000 | 0.0000 |        |
| Propadiene/Propyne      | 0.0000 | 0.0000 |        |
| Propylene               | 0.0000 | 0.0000 |        |
| Propane                 | 0.0000 | 0.0000 |        |
| Butadienes/C4Acetylenes | 0.0000 | 0.0000 |        |
| Butylenes               | 0.0000 | 0.0000 |        |
| Butanes                 | 0.0000 | 0.0000 |        |
| C5-Hydrocarbons         | 0.0000 | 0.0000 |        |

**Simulation Report – ECC 860 KTA**  
**Working Stage 6**

|                                     |         |         |      |
|-------------------------------------|---------|---------|------|
| C6 Non-Aromatics                    | 0.0000  | 0.0000  |      |
| C7 Non-Aromatics                    | 0.0000  | 0.0000  |      |
| C8 Non-Aromatics                    | 0.0000  | 0.0000  |      |
| Benzene                             | 0.0000  | 0.0000  |      |
| Toluene                             | 0.0000  | 0.0000  |      |
| Xylenes/Ethylbenzene                | 0.0000  | 0.0000  |      |
| Styrene                             | 0.0000  | 0.0000  |      |
| C9-204°C                            | 0.0000  | 0.0000  |      |
| 204-288°C PGO                       | 0.0000  | 0.0000  |      |
| 288°C plus PFO                      | 0.0000  | 0.0000  |      |
| Steam/Water                         | 1.0000  | 1.0000  | 0.00 |
| Nitrogen                            | 0.0000  | 0.0000  |      |
| Wash Gasoline                       | 0.0000  | 0.0000  |      |
| <b>Operation Condition</b>          |         |         |      |
| Temperature (°C)                    | 117.10  | 117.10  | 0.00 |
| Pressure (Kg/cm <sup>2</sup> gauge) | 0.80    | 0.80    | 0.00 |
| Molar Flow (kgmole/h)               | 521.28  | 521.30  | 0.00 |
| Mass Flow (kg/h)                    | 9391.00 | 9391.00 | 0.00 |
| Molecular Weight                    | 18.0151 | 18.02   | 0.03 |
| Total                               | 1.0000  | 1.0000  |      |

| <b>2118</b>             |        | <b>Design</b> | <b>%Error</b> |
|-------------------------|--------|---------------|---------------|
| <b>Component (%mol)</b> |        |               |               |
| Hydrogen                | 0.0002 | 0.0000        |               |
| Carbon Monoxide         | 0.0000 | 0.0000        |               |
| Carbon Dioxide          | 0.0000 | 0.0000        |               |
| Hydrogen Sulphide       | 0.0000 | 0.0000        |               |
| Methane                 | 0.0004 | 0.0006        | 37.99         |
| Acetylene               | 0.0002 | 0.0001        | -132.12       |
| Ethylene                | 0.0002 | 0.0018        | 90.88         |
| Ethane                  | 0.0001 | 0.0005        | 84.35         |
| Propadiene/Propyne      | 0.0051 | 0.0004        | -1178.44      |
| Propylene               | 0.0639 | 0.0030        | -2031.05      |
| Propane                 | 0.0026 | 0.0001        | -2487.61      |
| Butadienes/C4Acetylenes | 0.0303 | 0.0026        | -1064.75      |
| Butylenes               | 0.0408 | 0.0026        | -1469.38      |
| Butanes                 | 0.0151 | 0.0008        | -1790.69      |
| C5-Hydrocarbons         | 0.0403 | 0.0027        | -1392.65      |
| C6 Non-Aromatics        | 0.0208 | 0.0021        | -888.72       |
| C7 Non-Aromatics        | 0.0108 | 0.0022        | -390.81       |
| C8 Non-Aromatics        | 0.0062 | 0.0026        | -138.91       |
| Benzene                 | 0.0024 | 0.0206        | 88.29         |
| Toluene                 | 0.0055 | 0.0450        | 87.69         |

**Simulation Report – ECC 860 KTA**  
**Working Stage 6**

|                                     |           |           |        |
|-------------------------------------|-----------|-----------|--------|
| Xylenes/Ethylbenzene                | 0.0407    | 0.0355    | -14.57 |
| Styrene                             | 0.0086    | 0.0375    | 76.97  |
| C9-204°C                            | 0.6607    | 0.7904    | 16.41  |
| 204-288°C PGO                       | 0.0281    | 0.0343    | 18.12  |
| 288°C plus PFO                      | 0.0000    | 0.0000    |        |
| Steam/Water                         | 0.0170    | 0.0145    | -17.12 |
| Nitrogen                            | 0.0000    | 0.0000    |        |
| Wash Gasoline                       | 0.0000    | 0.0000    |        |
| <b>Operation Condition</b>          |           |           |        |
| Temperature (°C)                    | 85.00     | 85.00     | 0.00   |
| Pressure (Kg/cm <sup>2</sup> gauge) | 0.63      | 0.63      | 0.00   |
| Molar Flow (kgmole/h)               | 2758.13   | 2279.10   | -21.02 |
| Mass Flow (kg/h)                    | 297854.68 | 273763.00 | -8.80  |
| Molecular Weight                    | 0.0000    | 120.12    | 100.00 |
| Total                               | 1.0000    | 0.9999    |        |

| 2247                    |        | Design | %Error |
|-------------------------|--------|--------|--------|
| Component (%mol)        |        |        |        |
| Hydrogen                | 0.0000 | 0.0000 |        |
| Carbon Monoxide         | 0.0000 | 0.0000 |        |
| Carbon Dioxide          | 0.0000 | 0.0000 |        |
| Hydrogen Sulphide       | 0.0000 | 0.0000 |        |
| Methane                 | 0.0000 | 0.0000 |        |
| Acetylene               | 0.0000 | 0.0000 |        |
| Ethylene                | 0.0000 | 0.0000 |        |
| Ethane                  | 0.0000 | 0.0000 |        |
| Propadiene/Propyne      | 0.0000 | 0.0000 |        |
| Propylene               | 0.0000 | 0.0000 |        |
| Propane                 | 0.0000 | 0.0000 |        |
| Butadienes/C4Acetylenes | 0.0000 | 0.0000 |        |
| Butylenes               | 0.0000 | 0.0000 |        |
| Butanes                 | 0.0000 | 0.0000 |        |
| C5-Hydrocarbons         | 0.0000 | 0.0000 |        |
| C6 Non-Aromatics        | 0.0000 | 0.0000 |        |
| C7 Non-Aromatics        | 0.0000 | 0.0000 |        |
| C8 Non-Aromatics        | 0.0000 | 0.0000 |        |
| Benzene                 | 0.0000 | 0.0000 |        |
| Toluene                 | 0.0000 | 0.0000 |        |
| Xylenes/Ethylbenzene    | 0.0000 | 0.0000 |        |
| Styrene                 | 0.0000 | 0.0000 |        |
| C9-204°C                | 0.0000 | 0.0000 |        |
| 204-288°C PGO           | 0.0000 | 0.0000 |        |
| 288°C plus PFO          | 0.0000 | 0.0000 |        |

**Simulation Report – ECC 860 KTA**  
**Working Stage 6**

|                                     |           |               |               |
|-------------------------------------|-----------|---------------|---------------|
| Steam/Water                         | 1.0000    | 1.0000        | 0.00          |
| Nitrogen                            | 0.0000    | 0.0000        |               |
| Wash Gasoline                       | 0.0000    | 0.0000        |               |
| <b>Operation Condition</b>          |           |               |               |
| Temperature (°C)                    | 84.54     | 85.00         | 0.55          |
| Pressure (Kg/cm <sup>2</sup> gauge) | 10.96     | 10.96         | 0.00          |
| Molar Flow (kgmole/h)               | 13984.66  | 13984.70      | 0.00          |
| Mass Flow (kg/h)                    | 251935.00 | 251935.00     | 0.00          |
| Molecular Weight                    | 18.0151   | 18.02         | 0.03          |
| Total                               | 1.0000    | 1.0000        |               |
| <b>3081</b>                         |           | <b>Design</b> | <b>%Error</b> |
| <b>Component (%mol)</b>             |           |               |               |
| Hydrogen                            | 0.0000    | 0.0000        |               |
| Carbon Monoxide                     | 0.0000    | 0.0000        |               |
| Carbon Dioxide                      | 0.0000    | 0.0000        |               |
| Hydrogen Sulphide                   | 0.0000    | 0.0000        |               |
| Methane                             | 0.0000    | 0.0000        |               |
| Acetylene                           | 0.0000    | 0.0000        |               |
| Ethylene                            | 0.0005    | 0.0005        | 0.00          |
| Ethane                              | 0.0000    | 0.0000        |               |
| Propadiene/Propyne                  | 0.0000    | 0.0000        |               |
| Propylene                           | 0.7314    | 0.7314        | 0.00          |
| Propane                             | 0.2636    | 0.2636        | 0.00          |
| Butadienes/C4Acetylenes             | 0.0000    | 0.0000        |               |
| Butylenes                           | 0.0000    | 0.0000        |               |
| Butanes                             | 0.0000    | 0.0000        |               |
| C5-Hydrocarbons                     | 0.0000    | 0.0000        |               |
| C6 Non-Aromatics                    | 0.0000    | 0.0000        |               |
| C7 Non-Aromatics                    | 0.0000    | 0.0000        |               |
| C8 Non-Aromatics                    | 0.0000    | 0.0000        |               |
| Benzene                             | 0.0000    | 0.0000        |               |
| Toluene                             | 0.0000    | 0.0000        |               |
| Xylenes/Ethylbenzene                | 0.0000    | 0.0000        |               |
| Styrene                             | 0.0000    | 0.0000        |               |
| C9-204°C                            | 0.0000    | 0.0000        |               |
| 204-288°C PGO                       | 0.0000    | 0.0000        |               |
| 288°C plus PFO                      | 0.0000    | 0.0000        |               |
| Steam/Water                         | 0.0000    | 0.0000        |               |
| Nitrogen                            | 0.0045    | 0.0045        |               |
| Wash Gasoline                       | 0.0000    | 0.0000        |               |
| <b>Operation Condition</b>          |           |               |               |
| Temperature (°C)                    | 40.00     | 40.00         | 0.00          |
| Pressure (Kg/cm <sup>2</sup> gauge) | 7.00      | 7.00          | 0.00          |



**Simulation Report – ECC 860 KTA**  
**Working Stage 6**

|                       |         |        |      |
|-----------------------|---------|--------|------|
| Molar Flow (kgmole/h) | 7.05    | 7.10   | 0.68 |
| Mass Flow (kg/h)      | 300.00  | 300.00 | 0.00 |
| Molecular Weight      | 42.5418 | 42.54  | 0.00 |
| Total                 | 1.0000  | 1.0000 |      |

| 2232                                |            | Design     | %Error |
|-------------------------------------|------------|------------|--------|
| Component (%mol)                    |            |            |        |
| Hydrogen                            | 0.0000     | 0.0000     |        |
| Carbon Monoxide                     | 0.0000     | 0.0000     |        |
| Carbon Dioxide                      | 0.0000     | 0.0000     |        |
| Hydrogen Sulphide                   | 0.0000     | 0.0000     |        |
| Methane                             | 0.0000     | 0.0000     |        |
| Acetylene                           | 0.0000     | 0.0000     |        |
| Ethylene                            | 0.0000     | 0.0000     |        |
| Ethane                              | 0.0000     | 0.0000     |        |
| Propadiene/Propyne                  | 0.0000     | 0.0000     |        |
| Propylene                           | 0.0000     | 0.0000     |        |
| Propane                             | 0.0000     | 0.0000     |        |
| Butadienes/C4Acetylenes             | 0.0000     | 0.0000     |        |
| Butylenes                           | 0.0000     | 0.0000     |        |
| Butanes                             | 0.0000     | 0.0000     |        |
| C5-Hydrocarbons                     | 0.0000     | 0.0000     |        |
| C6 Non-Aromatics                    | 0.0000     | 0.0000     |        |
| C7 Non-Aromatics                    | 0.0000     | 0.0000     |        |
| C8 Non-Aromatics                    | 0.0000     | 0.0000     |        |
| Benzene                             | 0.0000     | 0.0000     |        |
| Toluene                             | 0.0000     | 0.0000     |        |
| Xylenes/Ethylbenzene                | 0.0000     | 0.0000     |        |
| Styrene                             | 0.0000     | 0.0000     |        |
| C9-204°C                            | 0.0000     | 0.0000     |        |
| 204-288°C PGO                       | 0.0000     | 0.0000     |        |
| 288°C plus PFO                      | 0.0000     | 0.0000     |        |
| Steam/Water                         | 1.0000     | 1.0000     | 0.00   |
| Nitrogen                            | 0.0000     | 0.0000     |        |
| Wash Gasoline                       | 0.0000     | 0.0000     |        |
| Operation Condition                 |            |            |        |
| Temperature (°C)                    | 44.70      | 44.70      | 0.00   |
| Pressure (Kg/cm <sup>2</sup> gauge) | 6.46       | 6.46       | 0.00   |
| Molar Flow (kgmole/h)               | 133482.30  | 133483.00  | 0.00   |
| Mass Flow (kg/h)                    | 2404697.00 | 2404697.00 | 0.00   |
| Molecular Weight                    | 18.0151    | 18.02      | 0.03   |
| Total                               | 1.0000     | 1.0000     |        |

**Simulation Report – ECC 860 KTA**  
**Working Stage 6**

| 2235                                |            | Design     | %Error |
|-------------------------------------|------------|------------|--------|
| Component (%mol)                    |            |            |        |
| Hydrogen                            | 0.0000     | 0.0000     |        |
| Carbon Monoxide                     | 0.0000     | 0.0000     |        |
| Carbon Dioxide                      | 0.0000     | 0.0000     |        |
| Hydrogen Sulphide                   | 0.0000     | 0.0000     |        |
| Methane                             | 0.0000     | 0.0000     |        |
| Acetylene                           | 0.0000     | 0.0000     |        |
| Ethylene                            | 0.0000     | 0.0000     |        |
| Ethane                              | 0.0000     | 0.0000     |        |
| Propadiene/Propyne                  | 0.0000     | 0.0000     |        |
| Propylene                           | 0.0000     | 0.0000     |        |
| Propane                             | 0.0000     | 0.0000     |        |
| Butadienes/C4Acetylenes             | 0.0000     | 0.0000     |        |
| Butylenes                           | 0.0000     | 0.0000     |        |
| Butanes                             | 0.0000     | 0.0000     |        |
| C5-Hydrocarbons                     | 0.0000     | 0.0000     |        |
| C6 Non-Aromatics                    | 0.0000     | 0.0000     |        |
| C7 Non-Aromatics                    | 0.0000     | 0.0000     |        |
| C8 Non-Aromatics                    | 0.0000     | 0.0000     |        |
| Benzene                             | 0.0000     | 0.0000     |        |
| Toluene                             | 0.0000     | 0.0000     |        |
| Xylenes/Ethylbenzene                | 0.0000     | 0.0000     |        |
| Styrene                             | 0.0000     | 0.0000     |        |
| C9-204°C                            | 0.0000     | 0.0000     |        |
| 204-288°C PGO                       | 0.0000     | 0.0000     |        |
| 288°C plus PFO                      | 0.0000     | 0.0000     |        |
| Steam/Water                         | 1.0000     | 1.0000     | 0.00   |
| Nitrogen                            | 0.0000     | 0.0000     |        |
| Wash Gasoline                       | 0.0000     | 0.0000     |        |
| Operation Condition                 |            |            |        |
| Temperature (°C)                    | 35.00      | 35.00      | 0.00   |
| Pressure (Kg/cm <sup>2</sup> gauge) | 1.26       | 1.26       | 0.00   |
| Molar Flow (kgmole/h)               | 58371.98   | 56572.00   | -3.18  |
| Mass Flow (kg/h)                    | 1051577.00 | 1019145.00 | -3.18  |
| Molecular Weight                    | 18.0151    | 18.02      | 0.03   |
| Total                               | 1.0000     | 1.0000     |        |

| 3025             |        | Design | %Error |
|------------------|--------|--------|--------|
| Component (%mol) |        |        |        |
| Hydrogen         | 0.0000 | 0.0000 |        |
| Carbon Monoxide  | 0.0000 | 0.0000 |        |
| Carbon Dioxide   | 0.0000 | 0.0000 |        |

**Simulation Report – ECC 860 KTA**  
**Working Stage 6**

|                                     |         |         |         |
|-------------------------------------|---------|---------|---------|
| Hydrogen Sulphide                   | 0.0000  | 0.0000  |         |
| Methane                             | 0.0001  | 0.0000  |         |
| Acetylene                           | 0.0000  | 0.0000  |         |
| Ethylene                            | 0.0002  | 0.0000  |         |
| Ethane                              | 0.0001  | 0.0000  |         |
| Propadiene/Propyne                  | 0.0000  | 0.0000  |         |
| Propylene                           | 0.0004  | 0.0001  | -315.53 |
| Propane                             | 0.0000  | 0.0000  |         |
| Butadienes/C4Acetylenes             | 0.0003  | 0.0001  | -202.40 |
| Butylenes                           | 0.0004  | 0.0001  | -280.27 |
| Butanes                             | 0.0001  | 0.0000  |         |
| C5-Hydrocarbons                     | 0.0007  | 0.0001  | -562.55 |
| C6 Non-Aromatics                    | 0.0010  | 0.0002  | -387.91 |
| C7 Non-Aromatics                    | 0.0010  | 0.0002  | -402.33 |
| C8 Non-Aromatics                    | 0.0012  | 0.0003  | -306.72 |
| Benzene                             | 0.0046  | 0.0018  | -157.69 |
| Toluene                             | 0.0102  | 0.0039  | -162.58 |
| Xylenes/Ethylbenzene                | 0.0060  | 0.0021  | -184.48 |
| Styrene                             | 0.0044  | 0.0018  | -142.95 |
| C9-204°C                            | 0.0172  | 0.0041  | -320.28 |
| 204-288°C PGO                       | 0.0000  | 0.0000  |         |
| 288°C plus PFO                      | 0.0000  | 0.0000  |         |
| Steam/Water                         | 0.9520  | 0.9852  | 3.37    |
| Nitrogen                            | 0.0000  | 0.0000  |         |
| Wash Gasoline                       | 0.0000  | 0.0000  |         |
| <b>Operation Condition</b>          |         |         |         |
| Temperature (°C)                    | 36.90   | 36.90   | 0.00    |
| Pressure (Kg/cm <sup>2</sup> gauge) | 4.46    | 4.46    | 0.00    |
| Molar Flow (kgmole/h)               | 410.46  | 410.50  | 0.01    |
| Mass Flow (kg/h)                    | 7902.00 | 7902.00 | 0.00    |
| Molecular Weight                    | 19.2516 | 19.25   | -0.01   |
| Total                               | 1.0000  | 1.0000  |         |

| 4010                    |        | Design | %Error |
|-------------------------|--------|--------|--------|
| <b>Component (%mol)</b> |        |        |        |
| Hydrogen                | 0.0000 | 0.0000 |        |
| Carbon Monoxide         | 0.0000 | 0.0000 |        |
| Carbon Dioxide          | 0.0000 | 0.0000 |        |
| Hydrogen Sulphide       | 0.0000 | 0.0000 |        |
| Methane                 | 0.0000 | 0.0000 |        |
| Acetylene               | 0.0000 | 0.0000 |        |
| Ethylene                | 0.0000 | 0.0000 |        |
| Ethane                  | 0.0000 | 0.0000 |        |

**Simulation Report – ECC 860 KTA**  
**Working Stage 6**

|                                     |         |        |      |
|-------------------------------------|---------|--------|------|
| Propadiene/Propyne                  | 0.0000  | 0.0000 |      |
| Propylene                           | 0.0000  | 0.0000 |      |
| Propane                             | 0.0000  | 0.0000 |      |
| Butadienes/C4Acetylenes             | 0.0000  | 0.0000 |      |
| Butylenes                           | 0.0000  | 0.0000 |      |
| Butanes                             | 0.0000  | 0.0000 |      |
| C5-Hydrocarbons                     | 0.0000  | 0.0000 |      |
| C6 Non-Aromatics                    | 0.0000  | 0.0000 |      |
| C7 Non-Aromatics                    | 0.0000  | 0.0000 |      |
| C8 Non-Aromatics                    | 0.0000  | 0.0000 |      |
| Benzene                             | 0.0000  | 0.0000 |      |
| Toluene                             | 0.0000  | 0.0000 |      |
| Xylenes/Ethylbenzene                | 0.0000  | 0.0000 |      |
| Styrene                             | 0.0000  | 0.0000 |      |
| C9-204°C                            | 0.0000  | 0.0000 |      |
| 204-288°C PGO                       | 0.0000  | 0.0000 |      |
| 288°C plus PFO                      | 0.0000  | 0.0000 |      |
| Steam/Water                         | 1.0000  | 1.0000 | 0.00 |
| Nitrogen                            | 0.0000  | 0.0000 |      |
| Wash Gasoline                       | 0.0000  | 0.0000 |      |
| <b>Operation Condition</b>          |         |        |      |
| Temperature (°C)                    | 16.70   | 16.70  | 0.00 |
| Pressure (Kg/cm <sup>2</sup> gauge) | 3.81    | 3.81   | 0.00 |
| Molar Flow (kgmole/h)               | 2.50    | 2.50   | 0.08 |
| Mass Flow (kg/h)                    | 45.00   | 45.00  | 0.00 |
| Molecular Weight                    | 18.0151 | 18.02  | 0.03 |
| Total                               | 1.0000  | 1.0000 |      |

| 2123                    |        | Design | %Error |
|-------------------------|--------|--------|--------|
| Component (%mol)        |        |        |        |
| Hydrogen                | 0.0000 | 0.0000 |        |
| Carbon Monoxide         | 0.0000 | 0.0000 |        |
| Carbon Dioxide          | 0.0000 | 0.0000 |        |
| Hydrogen Sulphide       | 0.0000 | 0.0000 |        |
| Methane                 | 0.0000 | 0.0000 |        |
| Acetylene               | 0.0000 | 0.0000 |        |
| Ethylene                | 0.0000 | 0.0000 |        |
| Ethane                  | 0.0000 | 0.0000 |        |
| Propadiene/Propyne      | 0.0000 | 0.0000 |        |
| Propylene               | 0.0000 | 0.0000 |        |
| Propane                 | 0.0000 | 0.0000 |        |
| Butadienes/C4Acetylenes | 0.0000 | 0.0000 |        |
| Butylenes               | 0.0000 | 0.0000 |        |

**Simulation Report – ECC 860 KTA**  
**Working Stage 6**

|                                     |           |               |               |
|-------------------------------------|-----------|---------------|---------------|
| Butanes                             | 0.0000    | 0.0000        |               |
| C5-Hydrocarbons                     | 0.0000    | 0.0000        |               |
| C6 Non-Aromatics                    | 0.0000    | 0.0000        |               |
| C7 Non-Aromatics                    | 0.0000    | 0.0000        |               |
| C8 Non-Aromatics                    | 0.0000    | 0.0000        |               |
| Benzene                             | 0.0000    | 0.0000        |               |
| Toluene                             | 0.0000    | 0.0000        |               |
| Xylenes/Ethylbenzene                | 0.0000    | 0.0000        |               |
| Styrene                             | 0.0000    | 0.0000        |               |
| C9-204°C                            | 0.0000    | 0.0000        |               |
| 204-288°C PGO                       | 0.0000    | 0.0000        |               |
| 288°C plus PFO                      | 0.0000    | 0.0000        |               |
| Steam/Water                         | 1.0000    | 1.0000        | 0.00          |
| Nitrogen                            | 0.0000    | 0.0000        |               |
| Wash Gasoline                       | 0.0000    | 0.0000        |               |
| <b>Operation Condition</b>          |           |               |               |
| Temperature (°C)                    | 80.88     | 85.00         | 4.85          |
| Pressure (Kg/cm <sup>2</sup> gauge) | 4.50      | 4.50          | 0.00          |
| Molar Flow (kgmole/h)               | 9998.65   | 10426.30      | 4.10          |
| Mass Flow (kg/h)                    | 180126.76 | 187829.00     | 4.10          |
| Molecular Weight                    | 18.0151   | 18.02         | 0.03          |
| Total                               | 1.0000    | 1.0000        |               |
| <b>2230</b>                         |           | <b>Design</b> | <b>%Error</b> |
| <b>Component (%mol)</b>             |           |               |               |
| Hydrogen                            | 0.0000    | 0.0000        |               |
| Carbon Monoxide                     | 0.0000    | 0.0000        |               |
| Carbon Dioxide                      | 0.0000    | 0.0000        |               |
| Hydrogen Sulphide                   | 0.0000    | 0.0000        |               |
| Methane                             | 0.0000    | 0.0000        |               |
| Acetylene                           | 0.0000    | 0.0000        |               |
| Ethylene                            | 0.0000    | 0.0000        |               |
| Ethane                              | 0.0000    | 0.0000        |               |
| Propadiene/Propyne                  | 0.0000    | 0.0000        |               |
| Propylene                           | 0.0000    | 0.0000        |               |
| Propane                             | 0.0000    | 0.0000        |               |
| Butadienes/C4Acetylenes             | 0.0000    | 0.0000        |               |
| Butylenes                           | 0.0000    | 0.0000        |               |
| Butanes                             | 0.0000    | 0.0000        |               |
| C5-Hydrocarbons                     | 0.0000    | 0.0000        |               |
| C6 Non-Aromatics                    | 0.0000    | 0.0000        |               |
| C7 Non-Aromatics                    | 0.0000    | 0.0000        |               |
| C8 Non-Aromatics                    | 0.0000    | 0.0000        |               |
| Benzene                             | 0.0000    | 0.0000        |               |

**Simulation Report – ECC 860 KTA**  
**Working Stage 6**

|                                     |            |            |       |
|-------------------------------------|------------|------------|-------|
| Toluene                             | 0.0000     | 0.0000     |       |
| Xylenes/Ethylbenzene                | 0.0000     | 0.0000     |       |
| Styrene                             | 0.0000     | 0.0000     |       |
| C9-204°C                            | 0.0000     | 0.0000     |       |
| 204-288°C PGO                       | 0.0000     | 0.0000     |       |
| 288°C plus PFO                      | 0.0000     | 0.0000     |       |
| Steam/Water                         | 1.0000     | 1.0000     | 0.00  |
| Nitrogen                            | 0.0000     | 0.0000     |       |
| Wash Gasoline                       | 0.0000     |            |       |
| <b>Operation Condition</b>          |            |            |       |
| Temperature (°C)                    | 67.12      | 67.40      | 0.41  |
| Pressure (Kg/cm <sup>2</sup> gauge) | 6.96       | 6.86       | -1.46 |
| Molar Flow (kgmole/h)               | 224159.45  | 224160.70  | 0.00  |
| Mass Flow (kg/h)                    | 4038255.00 | 4038255.00 | 0.00  |
| Molecular Weight                    | 18.0151    | 18.02      | 0.03  |
| Total                               | 1.0000     | 1.0000     |       |

| 2233                    |        | Design | %Error |
|-------------------------|--------|--------|--------|
| <b>Component (%mol)</b> |        |        |        |
| Hydrogen                | 0.0000 | 0.0000 |        |
| Carbon Monoxide         | 0.0000 | 0.0000 |        |
| Carbon Dioxide          | 0.0000 | 0.0000 |        |
| Hydrogen Sulphide       | 0.0000 | 0.0000 |        |
| Methane                 | 0.0000 | 0.0000 |        |
| Acetylene               | 0.0000 | 0.0000 |        |
| Ethylene                | 0.0000 | 0.0000 |        |
| Ethane                  | 0.0000 | 0.0000 |        |
| Propadiene/Propyne      | 0.0000 | 0.0000 |        |
| Propylene               | 0.0000 | 0.0000 |        |
| Propane                 | 0.0000 | 0.0000 |        |
| Butadienes/C4Acetylenes | 0.0000 | 0.0000 |        |
| Butylenes               | 0.0000 | 0.0000 |        |
| Butanes                 | 0.0000 | 0.0000 |        |
| C5-Hydrocarbons         | 0.0000 | 0.0000 |        |
| C6 Non-Aromatics        | 0.0000 | 0.0000 |        |
| C7 Non-Aromatics        | 0.0000 | 0.0000 |        |
| C8 Non-Aromatics        | 0.0000 | 0.0000 |        |
| Benzene                 | 0.0000 | 0.0000 |        |
| Toluene                 | 0.0000 | 0.0000 |        |
| Xylenes/Ethylbenzene    | 0.0000 | 0.0000 |        |
| Styrene                 | 0.0000 | 0.0000 |        |
| C9-204°C                | 0.0000 | 0.0000 |        |
| 204-288°C PGO           | 0.0000 | 0.0000 |        |

**Simulation Report – ECC 860 KTA**  
**Working Stage 6**

|                                     |            |            |        |
|-------------------------------------|------------|------------|--------|
| 288°C plus PFO                      | 0.0000     | 0.0000     |        |
| Steam/Water                         | 1.0000     | 1.0000     | 0.00   |
| Nitrogen                            | 0.0000     | 0.0000     |        |
| Wash Gasoline                       | 0.0000     | 0.0000     |        |
| <b>Operation Condition</b>          |            |            |        |
| Temperature (°C)                    | 44.70      | 44.70      | 0.00   |
| Pressure (Kg/cm <sup>2</sup> gauge) | 6.46       | 5.26       | -22.81 |
| Molar Flow (kgmole/h)               | 76865.52   | 76866.00   | 0.00   |
| Mass Flow (kg/h)                    | 1384740.00 | 1384740.00 | 0.00   |
| Molecular Weight                    | 18.0151    | 18.02      | 0.03   |
| Total                               | 1.0000     | 1.0000     |        |

| 3041                       |        | Design | %Error |
|----------------------------|--------|--------|--------|
| <b>Component (%mol)</b>    |        |        |        |
| Hydrogen                   | 0.0000 | 0.0000 |        |
| Carbon Monoxide            | 0.0000 | 0.0000 |        |
| Carbon Dioxide             | 0.0000 | 0.0000 |        |
| Hydrogen Sulphide          | 0.0000 | 0.0000 |        |
| Methane                    | 0.0000 | 0.0000 |        |
| Acetylene                  | 0.0000 | 0.0000 |        |
| Ethylene                   | 0.0000 | 0.0000 |        |
| Ethane                     | 0.0000 | 0.0000 |        |
| Propadiene/Propyne         | 0.0000 | 0.0000 |        |
| Propylene                  | 0.0000 | 0.0000 |        |
| Propane                    | 0.0000 | 0.0000 |        |
| Butadienes/C4Acetylenes    | 0.0018 | 0.0018 | 0.00   |
| Butylenes                  | 0.0001 | 0.0001 | 0.00   |
| Butanes                    | 0.0000 | 0.0000 |        |
| C5-Hydrocarbons            | 0.0169 | 0.0169 | 0.00   |
| C6 Non-Aromatics           | 0.0216 | 0.0216 | 0.00   |
| C7 Non-Aromatics           | 0.0316 | 0.0316 | 0.00   |
| C8 Non-Aromatics           | 0.0272 | 0.0272 | 0.00   |
| Benzene                    | 0.2187 | 0.2187 | 0.00   |
| Toluene                    | 0.3830 | 0.3830 | 0.00   |
| Xylenes/Ethylbenzene       | 0.0972 | 0.0972 | 0.00   |
| Styrene                    | 0.0589 | 0.0589 | 0.00   |
| C9-204°C                   | 0.1394 | 0.1394 | 0.00   |
| 204-288°C PGO              | 0.0036 | 0.0036 | 0.00   |
| 288°C plus PFO             | 0.0000 | 0.0000 |        |
| Steam/Water                | 0.0000 | 0.0000 |        |
| Nitrogen                   | 0.0000 | 0.0000 |        |
| Wash Gasoline              | 0.0000 | 0.0000 |        |
| <b>Operation Condition</b> |        |        |        |

**Simulation Report – ECC 860 KTA**  
**Working Stage 6**

|                                     |         |         |       |
|-------------------------------------|---------|---------|-------|
| Temperature (°C)                    | 119.90  | 119.90  | 0.00  |
| Pressure (Kg/cm <sup>2</sup> gauge) | 0.97    | 0.97    | 0.00  |
| Molar Flow (kgmole/h)               | 10.43   | 10.40   | -0.29 |
| Mass Flow (kg/h)                    | 1000.00 | 1000.00 | 0.00  |
| Molecular Weight                    | 95.8802 | 95.88   | 0.00  |
| Total                               | 1.0000  | 1.0000  |       |

| 3038                                |         | Design | %Error |
|-------------------------------------|---------|--------|--------|
| Component (%mol)                    |         |        |        |
| Hydrogen                            | 0.0059  | 0.0059 | 0.02   |
| Carbon Monoxide                     | 0.0000  | 0.0000 |        |
| Carbon Dioxide                      | 0.0002  | 0.0002 | 0.02   |
| Hydrogen Sulphide                   | 0.0001  | 0.0001 |        |
| Methane                             | 0.0203  | 0.0203 | 0.02   |
| Acetylene                           | 0.0043  | 0.0043 | 0.02   |
| Ethylene                            | 0.1002  | 0.1002 | 0.02   |
| Ethane                              | 0.0263  | 0.0263 | 0.02   |
| Propadiene/Propyne                  | 0.0244  | 0.0244 | 0.02   |
| Propylene                           | 0.1805  | 0.1805 | 0.02   |
| Propane                             | 0.0069  | 0.0069 | 0.02   |
| Butadienes/C4Acetylenes             | 0.1659  | 0.1659 | 0.02   |
| Butylenes                           | 0.1865  | 0.1865 | 0.02   |
| Butanes                             | 0.0579  | 0.0579 | 0.02   |
| C5-Hydrocarbons                     | 0.0418  | 0.0418 | 0.02   |
| C6 Non-Aromatics                    | 0.0129  | 0.0129 | 0.02   |
| C7 Non-Aromatics                    | 0.0061  | 0.0061 | 0.02   |
| C8 Non-Aromatics                    | 0.0018  | 0.0018 | 0.02   |
| Benzene                             | 0.0519  | 0.0519 | 0.02   |
| Toluene                             | 0.0296  | 0.0296 | 0.02   |
| Xylenes/Ethylbenzene                | 0.0028  | 0.0028 | 0.02   |
| Styrene                             | 0.0012  | 0.0012 | 0.02   |
| C9-204°C                            | 0.0006  | 0.0006 | 0.02   |
| 204-288°C PGO                       | 0.0000  | 0.0000 |        |
| 288°C plus PFO                      | 0.0000  | 0.0000 |        |
| Steam/Water                         | 0.0721  | 0.0721 | 0.02   |
| Nitrogen                            | 0.0000  | 0.0000 |        |
| Wash Gasoline                       | 0.0000  | 0.0000 |        |
| <b>Operation Condition</b>          |         |        |        |
| Temperature (°C)                    | 50.70   | 50.70  | 0.00   |
| Pressure (Kg/cm <sup>2</sup> gauge) | 0.77    | 0.77   | 0.00   |
| Molar Flow (kgmole/h)               | 15.20   | 15.20  | -0.02  |
| Mass Flow (kg/h)                    | 748.00  | 748.00 | 0.00   |
| Molecular Weight                    | 49.2003 | 49.12  | -0.16  |



**Simulation Report – ECC 860 KTA**  
**Working Stage 6**

|       |        |        |  |
|-------|--------|--------|--|
| Total | 1.0000 | 1.0002 |  |
|-------|--------|--------|--|

| 2117                                |           | Design    | %Error |
|-------------------------------------|-----------|-----------|--------|
| Component (%mol)                    |           |           |        |
| Hydrogen                            | 0.1448    | 0.1448    | -0.02  |
| Carbon Monoxide                     | 0.0009    | 0.0009    | -0.02  |
| Carbon Dioxide                      | 0.0003    | 0.0003    | -0.02  |
| Hydrogen Sulphide                   | 0.0000    | 0.0000    |        |
| Methane                             | 0.2517    | 0.2516    | -0.02  |
| Acetylene                           | 0.0051    | 0.0051    | -0.02  |
| Ethylene                            | 0.2803    | 0.2802    | -0.02  |
| Ethane                              | 0.0492    | 0.0492    | -0.02  |
| Propadiene/Propyne                  | 0.0046    | 0.0046    | -0.02  |
| Propylene                           | 0.1016    | 0.1016    | -0.02  |
| Propane                             | 0.0032    | 0.0032    | -0.02  |
| Butadienes/C4Acetylenes             | 0.0202    | 0.0202    | -0.02  |
| Butylenes                           | 0.0274    | 0.0274    | -0.02  |
| Butanes                             | 0.0090    | 0.0090    | -0.02  |
| C5-Hydrocarbons                     | 0.0158    | 0.0158    | -0.02  |
| C6 Non-Aromatics                    | 0.0051    | 0.0051    | -0.02  |
| C7 Non-Aromatics                    | 0.0021    | 0.0021    | -0.02  |
| C8 Non-Aromatics                    | 0.0009    | 0.0009    | -0.02  |
| Benzene                             | 0.0191    | 0.0191    | -0.02  |
| Toluene                             | 0.0132    | 0.0132    | -0.02  |
| Xylenes/Ethylbenzene                | 0.0026    | 0.0026    | -0.02  |
| Styrene                             | 0.0015    | 0.0015    | -0.02  |
| C9-204°C                            | 0.0016    | 0.0016    | -0.02  |
| 204-288°C PGO                       | 0.0000    | 0.0000    |        |
| 288°C plus PFO                      | 0.0000    | 0.0000    |        |
| Steam/Water                         | 0.0398    | 0.0398    | -0.02  |
| Nitrogen                            | 0.0000    | 0.0000    |        |
| Wash Gasoline                       | 0.0000    | 0.0000    |        |
| Operation Condition                 |           |           |        |
| Temperature (°C)                    | 38.00     | 38.00     | 0.00   |
| Pressure (Kg/cm <sup>2</sup> gauge) | 0.56      | 0.56      | 0.00   |
| Molar Flow (kgmole/h)               | 12482.16  | 12497.50  | 0.12   |
| Mass Flow (kg/h)                    | 343764.00 | 343763.00 | 0.00   |
| Molecular Weight                    | 26.0121   | 27.51     | 5.44   |
| Total                               | 1.0000    | 0.9998    |        |

| 2121             |        | Design | %Error |
|------------------|--------|--------|--------|
| Component (%mol) |        |        |        |
| Hydrogen         | 0.0002 | 0.0000 |        |

**Simulation Report – ECC 860 KTA**  
**Working Stage 6**

|                                     |          |               |               |
|-------------------------------------|----------|---------------|---------------|
| Carbon Monoxide                     | 0.0000   | 0.0000        |               |
| Carbon Dioxide                      | 0.0000   | 0.0000        |               |
| Hydrogen Sulphide                   | 0.0000   | 0.0000        |               |
| Methane                             | 0.0004   | 0.0006        | 37.99         |
| Acetylene                           | 0.0002   | 0.0001        | -132.12       |
| Ethylene                            | 0.0002   | 0.0018        | 90.88         |
| Ethane                              | 0.0001   | 0.0005        | 84.35         |
| Propadiene/Propyne                  | 0.0051   | 0.0004        | -1178.44      |
| Propylene                           | 0.0639   | 0.0030        | -2031.05      |
| Propane                             | 0.0026   | 0.0001        | -2487.61      |
| Butadienes/C4Acetylenes             | 0.0303   | 0.0026        | -1064.75      |
| Butylenes                           | 0.0408   | 0.0026        | -1469.38      |
| Butanes                             | 0.0151   | 0.0008        | -1790.69      |
| C5-Hydrocarbons                     | 0.0403   | 0.0027        | -1392.65      |
| C6 Non-Aromatics                    | 0.0208   | 0.0021        | -888.72       |
| C7 Non-Aromatics                    | 0.0108   | 0.0022        | -390.81       |
| C8 Non-Aromatics                    | 0.0062   | 0.0026        | -138.91       |
| Benzene                             | 0.0024   | 0.0206        | 88.29         |
| Toluene                             | 0.0055   | 0.0450        | 87.69         |
| Xylenes/Ethylbenzene                | 0.0407   | 0.0355        | -14.57        |
| Styrene                             | 0.0086   | 0.0375        | 76.97         |
| C9-204°C                            | 0.6607   | 0.7904        | 16.41         |
| 204-288°C PGO                       | 0.0281   | 0.0343        | 18.12         |
| 288°C plus PFO                      | 0.0000   | 0.0000        |               |
| Steam/Water                         | 0.0170   | 0.0145        | -17.12        |
| Nitrogen                            | 0.0000   | 0.0000        |               |
| Wash Gasoline                       | 0.0000   | 0.0000        |               |
| <b>Operation Condition</b>          |          |               |               |
| Temperature (°C)                    | 101.03   | 85.40         | -18.30        |
| Pressure (Kg/cm <sup>2</sup> gauge) | 6.70     | 6.70          | 0.00          |
| Molar Flow (kgmole/h)               | 21.97    | 19.80         | -10.98        |
| Mass Flow (kg/h)                    | 2373.00  | 2373.00       | 0.00          |
| Molecular Weight                    | 109.7000 | 120.12        | 8.67          |
| Total                               | 1.0000   | 0.9999        |               |
| <b>2123</b>                         |          | <b>Design</b> | <b>%Error</b> |
| <b>Component (%mol)</b>             |          |               |               |
| Hydrogen                            | 0.0000   | 0.0000        |               |
| Carbon Monoxide                     | 0.0000   | 0.0000        |               |
| Carbon Dioxide                      | 0.0000   | 0.0000        |               |
| Hydrogen Sulphide                   | 0.0000   | 0.0000        |               |
| Methane                             | 0.0000   | 0.0000        |               |
| Acetylene                           | 0.0000   | 0.0000        |               |
| Ethylene                            | 0.0000   | 0.0000        |               |

**Simulation Report – ECC 860 KTA**  
**Working Stage 6**

|                                     |           |           |      |
|-------------------------------------|-----------|-----------|------|
| Ethane                              | 0.0000    | 0.0000    |      |
| Propadiene/Propyne                  | 0.0000    | 0.0000    |      |
| Propylene                           | 0.0000    | 0.0000    |      |
| Propane                             | 0.0000    | 0.0000    |      |
| Butadienes/C4Acetylenes             | 0.0000    | 0.0000    |      |
| Butylenes                           | 0.0000    | 0.0000    |      |
| Butanes                             | 0.0000    | 0.0000    |      |
| C5-Hydrocarbons                     | 0.0000    | 0.0000    |      |
| C6-C8 Non-Aromatics                 | 0.0000    | 0.0000    |      |
| Benzene                             | 0.0000    | 0.0000    |      |
| Toluene                             | 0.0000    | 0.0000    |      |
| Xylenes/Ethylbenzene                | 0.0000    | 0.0000    |      |
| Styrene                             | 0.0000    | 0.0000    |      |
| C9-205°C                            | 0.0000    | 0.0000    |      |
| 205-288°C PGO                       | 0.0000    | 0.0000    |      |
| 288°C plus PFO                      | 0.0000    | 0.0000    |      |
| Steam/Water                         | 1.0000    | 1.0000    | 0.00 |
| <b>Operation Condition</b>          |           |           |      |
| Temperature (°C)                    | 80.88     | 85.00     | 4.85 |
| Pressure (Kg/cm <sup>2</sup> gauge) | 4.50      | 4.50      | 0.00 |
| Molar Flow (kgmole/h)               | 9998.65   | 10426.30  | 4.10 |
| Mass Flow (kg/h)                    | 180126.76 | 187829.00 | 4.10 |
| Molecular Weight                    | 18.02     | 18.02     | 0.03 |
| Total                               | 1.0000    | 1.0000    |      |

| 2504                    |        | Design | %Error |
|-------------------------|--------|--------|--------|
| Component (%mol)        |        |        |        |
| Hydrogen                | 0.0000 | 0.0000 |        |
| Carbon Monoxide         | 0.0000 | 0.0000 |        |
| Carbon Dioxide          | 0.0000 | 0.0000 |        |
| Hydrogen Sulphide       | 0.0000 | 0.0000 |        |
| Methane                 | 0.0000 | 0.0000 |        |
| Acetylene               | 0.0000 | 0.0000 |        |
| Ethylene                | 0.0000 | 0.0000 |        |
| Ethane                  | 0.0000 | 0.0000 |        |
| Propadiene/Propyne      | 0.0000 | 0.0000 |        |
| Propylene               | 0.0000 | 0.0000 |        |
| Propane                 | 0.0000 | 0.0000 |        |
| Butadienes/C4Acetylenes | 0.0000 | 0.0000 |        |
| Butylenes               | 0.0000 | 0.0000 |        |
| Butanes                 | 0.0000 | 0.0000 |        |
| C5-Hydrocarbons         | 0.0000 | 0.0000 |        |
| C6-C8 Non-Aromatics     | 0.0000 | 0.0000 |        |

**Simulation Report – ECC 860 KTA**  
**Working Stage 6**

|                                     |           |           |      |
|-------------------------------------|-----------|-----------|------|
| Benzene                             | 0.0000    | 0.0000    |      |
| Toluene                             | 0.0000    | 0.0000    |      |
| Xylenes/Ethylbenzene                | 0.0000    | 0.0000    |      |
| Styrene                             | 0.0000    | 0.0000    |      |
| C9-205°C*                           | 0.0000    | 0.0000    |      |
| 205-288°C PGO                       | 0.0000    | 0.0000    |      |
| 288°C plus PFO                      | 0.0000    | 0.0000    |      |
| Steam/Water                         | 1.0000    | 1.0000    | 0.00 |
| <b>Operation Condition</b>          |           |           |      |
| Temperature (°C)                    | 120.85    | 121.10    | 0.21 |
| Pressure (Kg/cm <sup>2</sup> gauge) | 1.05      | 1.05      | 0.00 |
| Molar Flow (kgmole/h)               | 9904.91   | 9904.90   | 0.00 |
| Mass Flow (kg/h)                    | 178438.00 | 178438.00 | 0.00 |
| Molecular Weight                    | 18.02     | 18.02     | 0.03 |
| Total                               | 1.0000    | 1.0000    |      |

| 2507                       |        | Design | %Error |
|----------------------------|--------|--------|--------|
| <b>Component (%mol)</b>    |        |        |        |
| Hydrogen                   | 0.0000 | 0.0000 |        |
| Carbon Monoxide            | 0.0000 | 0.0000 |        |
| Carbon Dioxide             | 0.0000 | 0.0000 |        |
| Hydrogen Sulphide          | 0.0000 | 0.0000 |        |
| Methane                    | 0.0000 | 0.0000 |        |
| Acetylene                  | 0.0000 | 0.0000 |        |
| Ethylene                   | 0.0000 | 0.0000 |        |
| Ethane                     | 0.0000 | 0.0000 |        |
| Propadiene/Propyne         | 0.0000 | 0.0000 |        |
| Propylene                  | 0.0000 | 0.0000 |        |
| Propane                    | 0.0000 | 0.0000 |        |
| Butadienes/C4Acetylenes    | 0.0000 | 0.0000 |        |
| Butylenes                  | 0.0000 | 0.0000 |        |
| Butanes                    | 0.0000 | 0.0000 |        |
| C5-Hydrocarbons            | 0.0000 | 0.0000 |        |
| C6-C8 Non-Aromatics        | 0.0000 | 0.0000 |        |
| Benzene                    | 0.0000 | 0.0000 |        |
| Toluene                    | 0.0000 | 0.0000 |        |
| Xylenes/Ethylbenzene       | 0.0000 | 0.0000 |        |
| Styrene                    | 0.0000 | 0.0000 |        |
| C9-205°C                   | 0.0000 | 0.0000 |        |
| 205-288°C PGO              | 0.0000 | 0.0000 |        |
| 288°C plus PFO             | 0.0000 | 0.0000 |        |
| Steam/Water                | 1.0000 | 1.0000 | 0.00   |
| <b>Operation Condition</b> |        |        |        |

**Simulation Report – ECC 860 KTA**  
**Working Stage 6**

|                                     |           |           |      |
|-------------------------------------|-----------|-----------|------|
| Temperature (°C)                    | 150.00    | 150.00    | 0.00 |
| Pressure (Kg/cm <sup>2</sup> gauge) | 8.50      | 8.50      | 0.00 |
| Molar Flow (kgmole/h)               | 9835.75   | 9835.80   | 0.00 |
| Mass Flow (kg/h)                    | 177192.00 | 177192.00 | 0.00 |
| Molecular Weight                    | 18.02     | 18.02     | 0.03 |
| Total                               | 1.0000    | 1.0000    |      |

| 2512                                |           | Design    | %Error |
|-------------------------------------|-----------|-----------|--------|
| Component (%mol)                    |           |           |        |
| Hydrogen                            | 0.0000    | 0.0000    |        |
| Carbon Monoxide                     | 0.0000    | 0.0000    |        |
| Carbon Dioxide                      | 0.0000    | 0.0000    |        |
| Hydrogen Sulphide                   | 0.0000    | 0.0000    |        |
| Methane                             | 0.0000    | 0.0000    |        |
| Acetylene                           | 0.0000    | 0.0000    |        |
| Ethylene                            | 0.0000    | 0.0000    |        |
| Ethane                              | 0.0000    | 0.0000    |        |
| Propadiene/Propyne                  | 0.0000    | 0.0000    |        |
| Propylene                           | 0.0000    | 0.0000    |        |
| Propane                             | 0.0000    | 0.0000    |        |
| Butadienes/C4Acetylenes             | 0.0000    | 0.0000    |        |
| Butylenes                           | 0.0000    | 0.0000    |        |
| Butanes                             | 0.0000    | 0.0000    |        |
| C5-Hydrocarbons                     | 0.0000    | 0.0000    |        |
| C6-C8 Non-Aromatics                 | 0.0000    | 0.0000    |        |
| Benzene                             | 0.0000    | 0.0000    |        |
| Toluene                             | 0.0000    | 0.0000    |        |
| Xylenes/Ethylbenzene                | 0.0000    | 0.0000    |        |
| Styrene                             | 0.0000    | 0.0000    |        |
| C9-205°C                            | 0.0000    | 0.0000    |        |
| 205-288°C PGO                       | 0.0000    | 0.0000    |        |
| 288°C plus PFO                      | 0.0000    | 0.0000    |        |
| Steam/Water                         | 1.0000    | 1.0000    | 0.00   |
| Operation Condition                 |           |           |        |
| Temperature (°C)                    | 170.89    | 171.00    | 0.06   |
| Pressure (Kg/cm <sup>2</sup> gauge) | 7.20      | 7.20      | 0.00   |
| Molar Flow (kgmole/h)               | 17630.76  | 17630.90  | 0.00   |
| Mass Flow (kg/h)                    | 317620.00 | 317620.00 | 0.00   |
| Molecular Weight                    | 18.02     | 18.02     | 0.03   |
| Total                               | 1.0000    | 1.0000    |        |

| 2509             |  | Design | %Error |
|------------------|--|--------|--------|
| Component (%mol) |  |        |        |

**Simulation Report – ECC 860 KTA**  
**Working Stage 6**

|                                     |          |          |       |
|-------------------------------------|----------|----------|-------|
| Hydrogen                            | 0.0000   | 0.0000   |       |
| Carbon Monoxide                     | 0.0000   | 0.0000   |       |
| Carbon Dioxide                      | 0.0000   | 0.0000   |       |
| Hydrogen Sulphide                   | 0.0000   | 0.0000   |       |
| Methane                             | 0.0000   | 0.0000   |       |
| Acetylene                           | 0.0000   | 0.0000   |       |
| Ethylene                            | 0.0000   | 0.0000   |       |
| Ethane                              | 0.0000   | 0.0000   |       |
| Propadiene/Propyne                  | 0.0000   | 0.0000   |       |
| Propylene                           | 0.0000   | 0.0000   |       |
| Propane                             | 0.0000   | 0.0000   |       |
| Butadienes/C4Acetylenes             | 0.0000   | 0.0000   |       |
| Butylenes                           | 0.0000   | 0.0000   |       |
| Butanes                             | 0.0000   | 0.0000   |       |
| C5-Hydrocarbons                     | 0.0000   | 0.0000   |       |
| C6-C8 Non-Aromatics                 | 0.0000   | 0.0000   |       |
| Benzene                             | 0.0000   | 0.0000   |       |
| Toluene                             | 0.0000   | 0.0000   |       |
| Xylenes/Ethylbenzene                | 0.0000   | 0.0000   |       |
| Styrene                             | 0.0000   | 0.0000   |       |
| C9-205°C                            | 0.0000   | 0.0000   |       |
| 205-288°C PGO                       | 0.0000   | 0.0000   |       |
| 288°C plus PFO                      | 0.0000   | 0.0000   |       |
| Steam/Water                         | 1.0000   | 1.0000   | 0.00  |
| <b>Operation Condition</b>          |          |          |       |
| Temperature (°C)                    | 43.00    | 40.10    | -7.23 |
| Pressure (Kg/cm <sup>2</sup> gauge) | 3.00     | 3.00     | 0.00  |
| Molar Flow (kgmole/h)               | 610.24   | 612.50   | 0.37  |
| Mass Flow (kg/h)                    | 10993.55 | 11035.00 | 0.38  |
| Molecular Weight                    | 18.02    | 18.02    | 0.03  |
| Total                               | 1.0000   | 1.0000   |       |

| 2509               |        | Design | %Error |
|--------------------|--------|--------|--------|
| Component (%mol)   |        |        |        |
| Hydrogen           | 0.0000 | 0.0000 |        |
| Carbon Monoxide    | 0.0000 | 0.0000 |        |
| Carbon Dioxide     | 0.0000 | 0.0000 |        |
| Hydrogen Sulphide  | 0.0000 | 0.0000 |        |
| Methane            | 0.0000 | 0.0000 |        |
| Acetylene          | 0.0000 | 0.0000 |        |
| Ethylene           | 0.0000 | 0.0000 |        |
| Ethane             | 0.0000 | 0.0000 |        |
| Propadiene/Propyne | 0.0000 | 0.0000 |        |

**Simulation Report – ECC 860 KTA**  
**Working Stage 6**

|                                     |          |               |               |
|-------------------------------------|----------|---------------|---------------|
| Propylene                           | 0.0000   | 0.0000        |               |
| Propane                             | 0.0000   | 0.0000        |               |
| Butadienes/C4Acetylenes             | 0.0000   | 0.0000        |               |
| Butylenes                           | 0.0000   | 0.0000        |               |
| Butanes                             | 0.0000   | 0.0000        |               |
| C5-Hydrocarbons                     | 0.0000   | 0.0000        |               |
| C6-C8 Non-Aromatics                 | 0.0000   | 0.0000        |               |
| Benzene                             | 0.0000   | 0.0000        |               |
| Toluene                             | 0.0000   | 0.0000        |               |
| Xylenes/Ethylbenzene                | 0.0000   | 0.0000        |               |
| Styrene                             | 0.0000   | 0.0000        |               |
| C9-205°C                            | 0.0000   | 0.0000        |               |
| 205-288°C PGO                       | 0.0000   | 0.0000        |               |
| 288°C plus PFO                      | 0.0000   | 0.0000        |               |
| Steam/Water                         | 1.0000   | 1.0000        | 0.00          |
| <b>Operation Condition</b>          |          |               |               |
| Temperature (°C)                    | 43.00    | 40.10         | -7.23         |
| Pressure (Kg/cm <sup>2</sup> gauge) | 3.00     | 3.00          | 0.00          |
| Molar Flow (kgmole/h)               | 610.24   | 612.50        | 0.37          |
| Mass Flow (kg/h)                    | 10993.55 | 11035.00      | 0.38          |
| Molecular Weight                    | 18.02    | 18.02         | 0.03          |
| Total                               | 1.0000   | 1.0000        |               |
| <b>2515</b>                         |          | <b>Design</b> | <b>%Error</b> |
| <b>Component (%mol)</b>             |          |               |               |
| Hydrogen                            | 0.0000   | 0.0000        |               |
| Carbon Monoxide                     | 0.0000   | 0.0000        |               |
| Carbon Dioxide                      | 0.0000   | 0.0000        |               |
| Hydrogen Sulphide                   | 0.0000   | 0.0000        |               |
| Methane                             | 0.0000   | 0.0000        |               |
| Acetylene                           | 0.0000   | 0.0000        |               |
| Ethylene                            | 0.0000   | 0.0000        |               |
| Ethane                              | 0.0000   | 0.0000        |               |
| Propadiene/Propyne                  | 0.0000   | 0.0000        |               |
| Propylene                           | 0.0000   | 0.0000        |               |
| Propane                             | 0.0000   | 0.0000        |               |
| Butadienes/C4Acetylenes             | 0.0000   | 0.0000        |               |
| Butylenes                           | 0.0000   | 0.0000        |               |
| Butanes                             | 0.0000   | 0.0000        |               |
| C5-Hydrocarbons                     | 0.0000   | 0.0000        |               |
| C6-C8 Non-Aromatics                 | 0.0000   | 0.0000        |               |
| Benzene                             | 0.0000   | 0.0000        |               |
| Toluene                             | 0.0000   | 0.0000        |               |
| Xylenes/Ethylbenzene                | 0.0000   | 0.0000        |               |

**Simulation Report – ECC 860 KTA**  
**Working Stage 6**

|                                     |           |           |        |
|-------------------------------------|-----------|-----------|--------|
| Styrene                             | 0.0000    | 0.0000    |        |
| C9-205°C                            | 0.0000    | 0.0000    |        |
| 205-288°C PGO                       | 0.0000    | 0.0000    |        |
| 288°C plus PFO                      | 0.0000    | 0.0000    |        |
| Steam/Water                         | 1.0000    | 1.0000    | 0.00   |
| <b>Operation Condition</b>          |           |           |        |
| Temperature (°C)                    | 210.00    | 210.00    | 0.00   |
| Pressure (Kg/cm <sup>2</sup> gauge) | 7.05      | 7.05      | 0.00   |
| Molar Flow (kgmole/h)               | 9225.51   | 9223.30   | -0.02  |
| Mass Flow (kg/h)                    | 166198.45 | 166157.00 | -0.02  |
| Molecular Weight                    | 0.00      | 18.02     | 100.00 |
| Total                               | 1.0000    | 1.0000    |        |

| 2505                                |        | Design | %Error |
|-------------------------------------|--------|--------|--------|
| <b>Component (%mol)</b>             |        |        |        |
| Hydrogen                            | 0.0000 | 0.0000 |        |
| Carbon Monoxide                     | 0.0000 | 0.0000 |        |
| Carbon Dioxide                      | 0.0000 | 0.0000 |        |
| Hydrogen Sulphide                   | 0.0000 | 0.0000 |        |
| Methane                             | 0.0000 | 0.0000 |        |
| Acetylene                           | 0.0000 | 0.0000 |        |
| Ethylene                            | 0.0000 | 0.0000 |        |
| Ethane                              | 0.0000 | 0.0000 |        |
| Propadiene/Propyne                  | 0.0000 | 0.0000 |        |
| Propylene                           | 0.0000 | 0.0000 |        |
| Propane                             | 0.0000 | 0.0000 |        |
| Butadienes/C4Acetylenes             | 0.0000 | 0.0000 |        |
| Butylenes                           | 0.0000 | 0.0000 |        |
| Butanes                             | 0.0000 | 0.0000 |        |
| C5-Hydrocarbons                     | 0.0000 | 0.0000 |        |
| C6-C8 Non-Aromatics                 | 0.0000 | 0.0000 |        |
| Benzene                             | 0.0000 | 0.0000 |        |
| Toluene                             | 0.0000 | 0.0000 |        |
| Xylenes/Ethylbenzene                | 0.0000 | 0.0000 |        |
| Styrene                             | 0.0000 | 0.0000 |        |
| C9-205°C                            | 0.0000 | 0.0000 |        |
| 205-288°C PGO                       | 0.0000 | 0.0000 |        |
| 288°C plus PFO                      | 0.0000 | 0.0000 |        |
| Steam/Water                         | 1.0000 | 1.0000 | 0.00   |
| <b>Operation Condition</b>          |        |        |        |
| Temperature (°C)                    | 121.30 | 121.30 | 0.00   |
| Pressure (Kg/cm <sup>2</sup> gauge) | 10.50  | 10.50  | 0.00   |
| Molar Flow (kgmole/h)               | 69.16  | 69.20  | 0.05   |



**Simulation Report – ECC 860 KTA**  
**Working Stage 6**

|                  |         |         |      |
|------------------|---------|---------|------|
| Mass Flow (kg/h) | 1246.00 | 1246.00 | 0.00 |
| Molecular Weight | 18.02   | 18.02   | 0.03 |
| Total            | 1.0000  | 1.0000  |      |

| 2511                                |           | Design    | %Error |
|-------------------------------------|-----------|-----------|--------|
| <b>Component (%mol)</b>             |           |           |        |
| Hydrogen                            | 0.0000    | 0.0000    |        |
| Carbon Monoxide                     | 0.0000    | 0.0000    |        |
| Carbon Dioxide                      | 0.0000    | 0.0000    |        |
| Hydrogen Sulphide                   | 0.0000    | 0.0000    |        |
| Methane                             | 0.0000    | 0.0000    |        |
| Acetylene                           | 0.0000    | 0.0000    |        |
| Ethylene                            | 0.0000    | 0.0000    |        |
| Ethane                              | 0.0000    | 0.0000    |        |
| Propadiene/Propyne                  | 0.0000    | 0.0000    |        |
| Propylene                           | 0.0000    | 0.0000    |        |
| Propane                             | 0.0000    | 0.0000    |        |
| Butadienes/C4Acetylenes             | 0.0000    | 0.0000    |        |
| Butylenes                           | 0.0000    | 0.0000    |        |
| Butanes                             | 0.0000    | 0.0000    |        |
| C5-Hydrocarbons                     | 0.0000    | 0.0000    |        |
| C6-C8 Non-Aromatics                 | 0.0000    | 0.0000    |        |
| Benzene                             | 0.0000    | 0.0000    |        |
| Toluene                             | 0.0000    | 0.0000    |        |
| Xylenes/Ethylbenzene                | 0.0000    | 0.0000    |        |
| Styrene                             | 0.0000    | 0.0000    |        |
| C9-205°C                            | 0.0000    | 0.0000    |        |
| 205-288°C PGO                       | 0.0000    | 0.0000    |        |
| 288°C plus PFO                      | 0.0000    | 0.0000    |        |
| Steam/Water                         | 1.0000    | 1.0000    | 0.00   |
| <b>Operation Condition</b>          |           |           |        |
| Temperature (°C)                    | 170.89    | 171.00    | 0.06   |
| Pressure (Kg/cm <sup>2</sup> gauge) | 7.20      | 7.20      | 0.00   |
| Molar Flow (kgmole/h)               | 31365.19  | 31365.40  | 0.00   |
| Mass Flow (kg/h)                    | 565047.00 | 565047.00 | 0.00   |
| Molecular Weight                    | 18.02     | 18.02     | 0.03   |
| Total                               | 1.0000    | 1.0458    |        |

| 2513                    |        | Design | %Error |
|-------------------------|--------|--------|--------|
| <b>Component (%mol)</b> |        |        |        |
| Hydrogen                | 0.0000 | 0.0000 |        |
| Carbon Monoxide         | 0.0000 | 0.0000 |        |
| Carbon Dioxide          | 0.0000 | 0.0000 |        |

**Simulation Report – ECC 860 KTA**  
**Working Stage 6**

|                                     |           |           |      |
|-------------------------------------|-----------|-----------|------|
| Hydrogen Sulphide                   | 0.0000    | 0.0000    |      |
| Methane                             | 0.0000    | 0.0000    |      |
| Acetylene                           | 0.0000    | 0.0000    |      |
| Ethylene                            | 0.0000    | 0.0000    |      |
| Ethane                              | 0.0000    | 0.0000    |      |
| Propadiene/Propyne                  | 0.0000    | 0.0000    |      |
| Propylene                           | 0.0000    | 0.0000    |      |
| Propane                             | 0.0000    | 0.0000    |      |
| Butadienes/C4Acetylenes             | 0.0000    | 0.0000    |      |
| Butylenes                           | 0.0000    | 0.0000    |      |
| Butanes                             | 0.0000    | 0.0000    |      |
| C5-Hydrocarbons                     | 0.0000    | 0.0000    |      |
| C6-C8 Non-Aromatics                 | 0.0000    | 0.0000    |      |
| Benzene                             | 0.0000    | 0.0000    |      |
| Toluene                             | 0.0000    | 0.0000    |      |
| Xylenes/Ethylbenzene                | 0.0000    | 0.0000    |      |
| Styrene                             | 0.0000    | 0.0000    |      |
| C9-205°C                            | 0.0000    | 0.0000    |      |
| 205-288°C PGO                       | 0.0000    | 0.0000    |      |
| 288°C plus PFO                      | 0.0000    | 0.0000    |      |
| Steam/Water                         | 1.0000    | 1.0000    | 0.00 |
| <b>Operation Condition</b>          |           |           |      |
| Temperature (°C)                    | 170.89    | 171.00    | 0.06 |
| Pressure (Kg/cm <sup>2</sup> gauge) | 7.20      | 7.20      | 0.00 |
| Molar Flow (kgmole/h)               | 17630.76  | 17630.90  | 0.00 |
| Mass Flow (kg/h)                    | 317620.00 | 317620.00 | 0.00 |
| Molecular Weight                    | 18.02     | 18.02     | 0.03 |
| Total                               | 1.0000    | 1.0000    |      |

| <b>*2515</b>            |        | <b>Design</b> | <b>%Error</b> |
|-------------------------|--------|---------------|---------------|
| <b>Component (%mol)</b> |        |               |               |
| Hydrogen                | 0.0000 | 0.0000        |               |
| Carbon Monoxide         | 0.0000 | 0.0000        |               |
| Carbon Dioxide          | 0.0000 | 0.0000        |               |
| Hydrogen Sulphide       | 0.0000 | 0.0000        |               |
| Methane                 | 0.0000 | 0.0000        |               |
| Acetylene               | 0.0000 | 0.0000        |               |
| Ethylene                | 0.0000 | 0.0000        |               |
| Ethane                  | 0.0000 | 0.0000        |               |
| Propadiene/Propyne      | 0.0000 | 0.0000        |               |
| Propylene               | 0.0000 | 0.0000        |               |
| Propane                 | 0.0000 | 0.0000        |               |
| Butadienes/C4Acetylenes | 0.0000 | 0.0000        |               |

**Simulation Report – ECC 860 KTA**  
**Working Stage 6**

|                                     |           |               |               |
|-------------------------------------|-----------|---------------|---------------|
| Butylenes                           | 0.0000    | 0.0000        |               |
| Butanes                             | 0.0000    | 0.0000        |               |
| C5-Hydrocarbons                     | 0.0000    | 0.0000        |               |
| C6-C8 Non-Aromatics                 | 0.0000    | 0.0000        |               |
| Benzene                             | 0.0000    | 0.0000        |               |
| Toluene                             | 0.0000    | 0.0000        |               |
| Xylenes/Ethylbenzene                | 0.0000    | 0.0000        |               |
| Styrene                             | 0.0000    | 0.0000        |               |
| C9-205°C                            | 0.0000    | 0.0000        |               |
| 205-288°C PGO                       | 0.0000    | 0.0000        |               |
| 288°C plus PFO                      | 0.0000    | 0.0000        |               |
| Steam/Water                         | 1.0000    | 1.0000        | 0.00          |
| <b>Operation Condition</b>          |           |               |               |
| Temperature (°C)                    | 210.00    | 210.00        | 0.00          |
| Pressure (Kg/cm <sup>2</sup> gauge) | 7.05      | 7.05          | 0.00          |
| Molar Flow (kgmole/h)               | 9225.51   | 9223.30       | -0.02         |
| Mass Flow (kg/h)                    | 166198.45 | 166157.00     | -0.02         |
| Molecular Weight                    | 18.02     | 18.02         | 0.03          |
| Total                               | 1.0000    | 1.0000        |               |
| <b>2501</b>                         |           | <b>Design</b> | <b>%Error</b> |
| <b>Component (%mol)</b>             |           |               |               |
| Hydrogen                            | 0.0000    | 0.0000        |               |
| Carbon Monoxide                     | 0.0000    | 0.0000        |               |
| Carbon Dioxide                      | 0.0000    | 0.0000        |               |
| Hydrogen Sulphide                   | 0.0000    | 0.0000        |               |
| Methane                             | 0.0000    | 0.0000        |               |
| Acetylene                           | 0.0000    | 0.0000        |               |
| Ethylene*                           | 0.0000    | 0.0000        |               |
| Ethane                              | 0.0000    | 0.0000        |               |
| Propadiene/Propyne                  | 0.0000    | 0.0000        |               |
| Propylene                           | 0.0000    | 0.0000        |               |
| Propane                             | 0.0000    | 0.0000        |               |
| Butadienes/C4Acetylenes             | 0.0000    | 0.0000        |               |
| Butylenes                           | 0.0000    | 0.0000        |               |
| Butanes                             | 0.0000    | 0.0000        |               |
| C5-Hydrocarbons                     | 0.0000    | 0.0000        |               |
| C6-C8 Non-Aromatics                 | 0.0000    | 0.0000        |               |
| Benzene                             | 0.0000    | 0.0000        |               |
| Toluene                             | 0.0000    | 0.0000        |               |
| Xylenes/Ethylbenzene                | 0.0000    | 0.0000        |               |
| Styrene                             | 0.0000    | 0.0000        |               |
| C9-205°C                            | 0.0000    | 0.0000        |               |
| 205-288°C PGO                       | 0.0000    | 0.0000        |               |

**Simulation Report – ECC 860 KTA**  
**Working Stage 6**

|                                     |         |         |      |
|-------------------------------------|---------|---------|------|
| 288°C plus PFO                      | 0.0000  | 0.0000  |      |
| Steam/Water                         | 1.0000  | 1.0000  | 0.00 |
| <b>Operation Condition</b>          |         |         |      |
| Temperature (°C)                    | 117.10  | 117.10  | 0.00 |
| Pressure (Kg/cm <sup>2</sup> gauge) | 0.80    | 0.80    | 0.00 |
| Molar Flow (kgmole/h)               | 521.28  | 521.30  | 0.00 |
| Mass Flow (kg/h)                    | 9391.00 | 9391.00 | 0.00 |
| Molecular Weight                    | 18.02   | 18.02   | 0.03 |
| Total                               | 1.0000  | 1.0000  |      |

| 2506                                |           | Design    | %Error |
|-------------------------------------|-----------|-----------|--------|
| <b>Component (%mol)</b>             |           |           |        |
| Hydrogen                            | 0.0000    | 0.0000    |        |
| Carbon Monoxide                     | 0.0000    | 0.0000    |        |
| Carbon Dioxide                      | 0.0000    | 0.0000    |        |
| Hydrogen Sulphide                   | 0.0000    | 0.0000    |        |
| Methane                             | 0.0000    | 0.0000    |        |
| Acetylene                           | 0.0000    | 0.0000    |        |
| Ethylene                            | 0.0000    | 0.0000    |        |
| Ethane                              | 0.0000    | 0.0000    |        |
| Propadiene/Propyne                  | 0.0000    | 0.0000    |        |
| Propylene                           | 0.0000    | 0.0000    |        |
| Propane                             | 0.0000    | 0.0000    |        |
| Butadienes/C4Acetylenes             | 0.0000    | 0.0000    |        |
| Butylenes                           | 0.0000    | 0.0000    |        |
| Butanes                             | 0.0000    | 0.0000    |        |
| C5-Hydrocarbons                     | 0.0000    | 0.0000    |        |
| C6-C8 Non-Aromatics                 | 0.0000    | 0.0000    |        |
| Benzene                             | 0.0000    | 0.0000    |        |
| Toluene                             | 0.0000    | 0.0000    |        |
| Xylenes/Ethylbenzene                | 0.0000    | 0.0000    |        |
| Styrene                             | 0.0000    | 0.0000    |        |
| C9-205°C                            | 0.0000    | 0.0000    |        |
| 205-288°C PGO                       | 0.0000    | 0.0000    |        |
| 288°C plus PFO                      | 0.0000    | 0.0000    |        |
| Steam/Water                         | 1.0000    | 1.0000    | 0.00   |
| <b>Operation Condition</b>          |           |           |        |
| Temperature (°C)                    | 121.30    | 121.30    | 0.00   |
| Pressure (Kg/cm <sup>2</sup> gauge) | 10.50     | 10.50     | 0.00   |
| Molar Flow (kgmole/h)               | 9835.75   | 9835.80   | 0.00   |
| Mass Flow (kg/h)                    | 177192.00 | 177192.00 | 0.00   |
| Molecular Weight                    | 18.02     | 18.02     | 0.03   |
| Total                               | 1.0000    | 1.0000    |        |

**Simulation Report – ECC 860 KTA**  
**Working Stage 6**

---

| 2510                                |           | Design    | %Error |
|-------------------------------------|-----------|-----------|--------|
| <b>Component (%mol)</b>             |           |           |        |
| Hydrogen                            | 0.0000    | 0.0000    |        |
| Carbon Monoxide                     | 0.0000    | 0.0000    |        |
| Carbon Dioxide                      | 0.0000    | 0.0000    |        |
| Hydrogen Sulphide                   | 0.0000    | 0.0000    |        |
| Methane                             | 0.0000    | 0.0000    |        |
| Acetylene                           | 0.0000    | 0.0000    |        |
| Ethylene                            | 0.0000    | 0.0000    |        |
| Ethane                              | 0.0000    | 0.0000    |        |
| Propadiene/Propyne                  | 0.0000    | 0.0000    |        |
| Propylene                           | 0.0000    | 0.0000    |        |
| Propane                             | 0.0000    | 0.0000    |        |
| Butadienes/C4Acetylenes             | 0.0000    | 0.0000    |        |
| Butylenes                           | 0.0000    | 0.0000    |        |
| Butanes                             | 0.0000    | 0.0000    |        |
| C5-Hydrocarbons                     | 0.0000    | 0.0000    |        |
| C6-C8 Non-Aromatics                 | 0.0000    | 0.0000    |        |
| Benzene                             | 0.0000    | 0.0000    |        |
| Toluene                             | 0.0000    | 0.0000    |        |
| Xylenes/Ethylbenzene                | 0.0000    | 0.0000    |        |
| Styrene                             | 0.0000    | 0.0000    |        |
| C9-205°C                            | 0.0000    | 0.0000    |        |
| 205-288°C PGO                       | 0.0000    | 0.0000    |        |
| 288°C plus PFO                      | 0.0000    | 0.0000    |        |
| Steam/Water                         | 1.0000    | 1.0000    | 0.00   |
| <b>Operation Condition</b>          |           |           |        |
| Temperature (°C)                    | 170.89    | 171.00    | 0.06   |
| Pressure (Kg/cm <sup>2</sup> gauge) | 7.20      | 7.20      | 0.00   |
| Molar Flow (kgmole/h)               | 31365.19  | 31365.40  | 0.00   |
| Mass Flow (kg/h)                    | 565047.00 | 565047.00 | 0.00   |
| Molecular Weight                    | 18.02     | 18.02     | 0.03   |
| Total                               | 1.0000    | 1.0000    |        |

| 2514                    |        | Design | %Error |
|-------------------------|--------|--------|--------|
| <b>Component (%mol)</b> |        |        |        |
| Hydrogen                | 0.0000 | 0.0000 |        |
| Carbon Monoxide         | 0.0000 | 0.0000 |        |
| Carbon Dioxide          | 0.0000 | 0.0000 |        |
| Hydrogen Sulphide       | 0.0000 | 0.0000 |        |
| Methane                 | 0.0000 | 0.0000 |        |

**Simulation Report – ECC 860 KTA**  
**Working Stage 6**

|                                     |           |           |       |
|-------------------------------------|-----------|-----------|-------|
| Acetylene                           | 0.0000    | 0.0000    |       |
| Ethylene                            | 0.0000    | 0.0000    |       |
| Ethane                              | 0.0000    | 0.0000    |       |
| Propadiene/Propyne                  | 0.0000    | 0.0000    |       |
| Propylene                           | 0.0000    | 0.0000    |       |
| Propane                             | 0.0000    | 0.0000    |       |
| Butadienes/C4Acetylenes             | 0.0000    | 0.0000    |       |
| Butylenes                           | 0.0000    | 0.0000    |       |
| Butanes                             | 0.0000    | 0.0000    |       |
| C5-Hydrocarbons                     | 0.0000    | 0.0000    |       |
| C6-C8 Non-Aromatics                 | 0.0000    | 0.0000    |       |
| Benzene                             | 0.0000    | 0.0000    |       |
| Toluene                             | 0.0000    | 0.0000    |       |
| Xylenes/Ethylbenzene                | 0.0000    | 0.0000    |       |
| Styrene                             | 0.0000    | 0.0000    |       |
| C9-205°C                            | 0.0000    | 0.0000    |       |
| 205-288°C PGO                       | 0.0000    | 0.0000    |       |
| 288°C plus PFO                      | 0.0000    | 0.0000    |       |
| Steam/Water                         | 1.0000    | 1.0000    | 0.00  |
| <b>Operation Condition</b>          |           |           |       |
| Temperature (°C)                    | 170.89    | 171.00    | 0.06  |
| Pressure (Kg/cm <sup>2</sup> gauge) | 7.20      | 7.20      | 0.00  |
| Molar Flow (kgmole/h)               | 9225.51   | 9223.30   | -0.02 |
| Mass Flow (kg/h)                    | 166198.45 | 166157.00 | -0.02 |
| Molecular Weight                    | 18.02     | 18.02     | 0.03  |
| Total                               | 1.0000    | 1.0000    |       |

| 2508                    |        | Design | %Error |
|-------------------------|--------|--------|--------|
| Component (%mol)        |        |        |        |
| Hydrogen                | 0.0000 | 0.0000 |        |
| Carbon Monoxide         | 0.0000 | 0.0000 |        |
| Carbon Dioxide          | 0.0000 | 0.0000 |        |
| Hydrogen Sulphide       | 0.0000 | 0.0000 |        |
| Methane                 | 0.0000 | 0.0000 |        |
| Acetylene               | 0.0000 | 0.0000 |        |
| Ethylene                | 0.0000 | 0.0000 |        |
| Ethane                  | 0.0000 | 0.0000 |        |
| Propadiene/Propyne      | 0.0000 | 0.0000 |        |
| Propylene               | 0.0000 | 0.0000 |        |
| Propane                 | 0.0000 | 0.0000 |        |
| Butadienes/C4Acetylenes | 0.0000 | 0.0000 |        |
| Butylenes               | 0.0000 | 0.0000 |        |
| Butanes                 | 0.0000 | 0.0000 |        |

**Simulation Report – ECC 860 KTA**  
**Working Stage 6**

|                                     |          |               |               |
|-------------------------------------|----------|---------------|---------------|
| C5-Hydrocarbons                     | 0.0000   | 0.0000        |               |
| C6-C8 Non-Aromatics                 | 0.0000   | 0.0000        |               |
| Benzene                             | 0.0000   | 0.0000        |               |
| Toluene                             | 0.0000   | 0.0000        |               |
| Xylenes/Ethylbenzene                | 0.0000   | 0.0000        |               |
| Styrene                             | 0.0000   | 0.0000        |               |
| C9-205°C                            | 0.0000   | 0.0000        |               |
| 205-288°C PGO                       | 0.0000   | 0.0000        |               |
| 288°C plus PFO                      | 0.0000   | 0.0000        |               |
| Steam/Water                         | 1.0000   | 1.0000        | 0.00          |
| <b>Operation Condition</b>          |          |               |               |
| Temperature (°C)                    | 170.89   | 171.00        | 0.06          |
| Pressure (Kg/cm <sup>2</sup> gauge) | 7.20     | 7.20          | 0.00          |
| Molar Flow (kgmole/h)               | 610.24   | 612.50        | 0.37          |
| Mass Flow (kg/h)                    | 10993.55 | 11035.00      | 0.38          |
| Molecular Weight                    | 18.02    | 18.02         | 0.03          |
| Total                               | 1.0000   | 1.0000        |               |
| <b>4138</b>                         |          | <b>Design</b> | <b>%Error</b> |
| <b>Component (%mol)</b>             |          |               |               |
| Hydrogen                            | 0.2480   | 0.2478        | -0.10         |
| Carbon Monoxide                     | 0.0052   | 0.0052        | -0.10         |
| Carbon Dioxide                      | 0.0000   | 0.0000        |               |
| Hydrogen Sulphide                   | 0.0000   | 0.0000        |               |
| Methane                             | 0.7462   | 0.7455        | -0.10         |
| Acetylene                           | 0.0000   | 0.0000        |               |
| Ethylene                            | 0.0005   | 0.0005        | -0.10         |
| Ethane                              | 0.0000   | 0.0000        |               |
| Propadiene/Propyne                  | 0.0000   | 0.0000        |               |
| Propylene                           | 0.0000   | 0.0000        |               |
| Propane                             | 0.0000   | 0.0000        |               |
| Butadienes/C4Acetylenes             | 0.0000   | 0.0000        |               |
| Butylenes                           | 0.0000   | 0.0000        |               |
| Butanes                             | 0.0000   | 0.0000        |               |
| C5-Hydrocarbons                     | 0.0000   | 0.0000        |               |
| C6-C8 Non-Aromatics                 | 0.0000   | 0.0000        |               |
| Benzene                             | 0.0000   | 0.0000        |               |
| Toluene                             | 0.0000   | 0.0000        |               |
| Xylenes/Ethylbenzene                | 0.0000   | 0.0000        |               |
| Styrene                             | 0.0000   | 0.0000        |               |
| C9-205°C                            | 0.0000   | 0.0000        |               |
| Steam/Water                         | 0.0000   | 0.0000        |               |
| <b>Operation Condition</b>          |          |               |               |
| Temperature (°C)                    | 35.00    | 35.00         | 0.00          |

**Simulation Report – ECC 860 KTA**  
**Working Stage 6**

|                                     |         |         |       |
|-------------------------------------|---------|---------|-------|
| Pressure (Kg/cm <sup>2</sup> gauge) | 0.39    | 0.39    | 0.00  |
| Molar Flow (kgmole/h)               | 232.74  | 232.50  | -0.11 |
| Mass Flow (kg/h)                    | 2940.00 | 2940.00 | 0.00  |
| Molecular Weight                    | 13.3219 | 13.32   | -0.01 |
| Total                               | 1.0000  | 0.9990  |       |

| 3026                                |         | Design  | %Error |
|-------------------------------------|---------|---------|--------|
| <b>Component (%mol)</b>             |         |         |        |
| Hydrogen                            | 0.0000  | 0.0000  |        |
| Carbon Monoxide                     | 0.0000  | 0.0000  |        |
| Carbon Dioxide                      | 0.0000  | 0.0000  |        |
| Hydrogen Sulphide                   | 0.0000  | 0.0000  |        |
| Methane                             | 0.0000  | 0.0000  |        |
| Acetylene                           | 0.0000  | 0.0000  |        |
| Ethylene                            | 0.0000  | 0.0000  |        |
| Ethane                              | 0.0000  | 0.0000  |        |
| Propadiene/Propyne                  | 0.0000  | 0.0000  |        |
| Propylene                           | 0.0000  | 0.0000  |        |
| Propane                             | 0.0000  | 0.0000  |        |
| Butadienes/C4Acetylenes             | 0.0000  | 0.0000  |        |
| Butylenes                           | 0.0000  | 0.0000  |        |
| Butanes                             | 0.0000  | 0.0000  |        |
| C5-Hydrocarbons                     | 0.0000  | 0.0000  |        |
| C6-C8 Non-Aromatics                 | 0.0000  | 0.0000  |        |
| Benzene                             | 0.0000  | 0.0000  |        |
| Toluene                             | 0.0000  | 0.0000  |        |
| Xylenes/Ethylbenzene                | 0.0000  | 0.0000  |        |
| Styrene                             | 0.0000  | 0.0000  |        |
| C9-205°C                            | 0.0000  | 0.0000  |        |
| Steam/Water                         | 1.0000  | 1.0000  | 0.00   |
| <b>Operation Condition</b>          |         |         |        |
| Temperature (°C)                    | 39.34   | 38.90   | -1.12  |
| Pressure (Kg/cm <sup>2</sup> gauge) | 1.72    | 1.72    | 0.00   |
| Molar Flow (kgmole/h)               | 494.58  | 448.70  | -10.23 |
| Mass Flow (kg/h)                    | 8084.00 | 8084.00 | 0.00   |
| Molecular Weight                    | 18.0151 | 18.02   | 0.03   |
| Total                               | 1.0000  | 1.0000  |        |

| 3002                    |        | Design | %Error |
|-------------------------|--------|--------|--------|
| <b>Component (%mol)</b> |        |        |        |
| Hydrogen                | 0.1459 | 0.1466 | 0.48   |
| Carbon Monoxide         | 0.0010 | 0.0010 | 3.04   |



**Simulation Report – ECC 860 KTA**  
**Working Stage 6**

|                                     |           |           |         |
|-------------------------------------|-----------|-----------|---------|
| Carbon Dioxide                      | 0.0003    | 0.0003    | 2.75    |
| Hydrogen Sulphide                   | 0.0000    | 0.0000    | #DIV/0! |
| Methane                             | 0.2586    | 0.2599    | 0.50    |
| Acetylene                           | 0.0050    | 0.0050    | 0.81    |
| Ethylene                            | 0.2725    | 0.2738    | 0.48    |
| Ethane                              | 0.0478    | 0.0480    | 0.32    |
| Propadiene/Propyne                  | 0.0045    | 0.0045    | 0.61    |
| Propylene                           | 0.0988    | 0.0993    | 0.51    |
| Propane                             | 0.0031    | 0.0031    | -0.37   |
| Butadienes/C4Acetylenes             | 0.0196    | 0.0197    | 0.31    |
| Butylenes                           | 0.0267    | 0.0268    | 0.38    |
| Butanes                             | 0.0088    | 0.0088    | 0.50    |
| C5-Hydrocarbons                     | 0.0157    | 0.0158    | 0.86    |
| C6-C8 Non-Aromatics                 | 0.0078    | 0.0079    | 1.42    |
| Benzene                             | 0.0184    | 0.0187    | 1.37    |
| Toluene                             | 0.0125    | 0.0128    | 2.13    |
| Xylenes/Ethylbenzene                | 0.0023    | 0.0025    | 6.13    |
| Styrene                             | 0.0013    | 0.0015    | 11.63   |
| C9-205°C                            | 0.0010    | 0.0015    | 31.27   |
| Steam/Water                         | 0.0483    | 0.0425    | -13.76  |
| <b>Operation Condition</b>          |           |           |         |
| Temperature (°C)                    | 83.48     | 83.40     | -0.10   |
| Pressure (Kg/cm <sup>2</sup> gauge) | 1.88      | 1.88      | 0.00    |
| Molar Flow (kgmole/h)               | 12837.70  | 12786.30  | -0.40   |
| Mass Flow (kg/h)                    | 347354.00 | 343763.00 | -1.04   |
| Molecular Weight                    | 28.8936   | 29.24     | 1.18    |
| Total                               | 1.0000    | 1.0000    |         |

| 3005                    |        | Design | %Error  |
|-------------------------|--------|--------|---------|
| <b>Component (%mol)</b> |        |        |         |
| Hydrogen                | 0.1492 | 0.1492 | 0.01    |
| Carbon Monoxide         | 0.0010 | 0.0010 | 0.85    |
| Carbon Dioxide          | 0.0003 | 0.0003 | 0.50    |
| Hydrogen Sulphide       | 0.0000 | 0.0000 | #DIV/0! |
| Methane                 | 0.2645 | 0.2646 | 0.05    |
| Acetylene               | 0.0051 | 0.0051 | 0.46    |
| Ethylene                | 0.2788 | 0.2790 | 0.06    |
| Ethane                  | 0.0490 | 0.0490 | 0.06    |
| Propadiene/Propyne      | 0.0046 | 0.0046 | 0.11    |
| Propylene               | 0.1013 | 0.1014 | 0.07    |
| Propane                 | 0.0032 | 0.0032 | 0.26    |
| Butadienes/C4Acetylenes | 0.0203 | 0.0204 | 0.55    |
| Butylenes               | 0.0276 | 0.0276 | 0.15    |

**Simulation Report – ECC 860 KTA**  
**Working Stage 6**

|                                     |           |           |       |
|-------------------------------------|-----------|-----------|-------|
| Butanes                             | 0.0090    | 0.0092    | 1.65  |
| C5-Hydrocarbons                     | 0.0164    | 0.0166    | 1.12  |
| C6-C8 Non-Aromatics                 | 0.0086    | 0.0090    | 4.70  |
| Benzene                             | 0.0212    | 0.0210    | -1.16 |
| Toluene                             | 0.0121    | 0.0115    | -5.53 |
| Xylenes/Ethylbenzene                | 0.0010    | 0.0010    | -0.01 |
| Styrene                             | 0.0004    | 0.0004    | -5.52 |
| C9-205°C                            | 0.0001    | 0.0003    |       |
| Steam/Water                         | 0.0262    | 0.0256    | -2.53 |
| <b>Operation Condition</b>          |           |           |       |
| Temperature (°C)                    | 85.86     | 85.90     | 0.05  |
| Pressure (Kg/cm <sup>2</sup> gauge) | 4.42      | 4.42      | 0.00  |
| Molar Flow (kgmole/h)               | 12554.80  | 12563.50  | 0.07  |
| Mass Flow (kg/h)                    | 340685.64 | 340689.00 | 0.00  |
| Molecular Weight                    | 28.2768   | 27.12     | -4.27 |
| Total                               | 1.0000    | 1.0000    |       |

| 3044                       |        | Design | %Error  |
|----------------------------|--------|--------|---------|
| <b>Component (%mol)</b>    |        |        |         |
| Hydrogen                   | 0.0001 | 0.0003 | 55.26   |
| Carbon Monoxide            | 0.0000 | 0.0000 |         |
| Carbon Dioxide             | 0.0000 | 0.0000 |         |
| Hydrogen Sulphide          | 0.0000 | 0.0000 |         |
| Methane                    | 0.0022 | 0.0009 | -146.47 |
| Acetylene                  | 0.0003 | 0.0002 | -26.30  |
| Ethylene                   | 0.0097 | 0.0047 | -105.68 |
| Ethane                     | 0.0023 | 0.0012 | -94.87  |
| Propadiene/Propyne         | 0.0012 | 0.0012 | 2.88    |
| Propylene                  | 0.0163 | 0.0084 | -93.62  |
| Propane                    | 0.0005 | 0.0003 | -78.74  |
| Butadienes/C4Acetylenes    | 0.0119 | 0.0097 | -23.06  |
| Butylenes                  | 0.0147 | 0.0089 | -64.75  |
| Butanes                    | 0.0054 | 0.0028 | -92.37  |
| C5-Hydrocarbons            | 0.0242 | 0.0196 | -23.36  |
| C6-C8 Non-Aromatics        | 0.1081 | 0.0856 | -26.27  |
| Benzene                    | 0.2199 | 0.2321 | 5.27    |
| Toluene                    | 0.3896 | 0.4025 | 3.19    |
| Xylenes/Ethylbenzene       | 0.0952 | 0.0992 | 4.03    |
| Styrene                    | 0.0545 | 0.0593 | 8.01    |
| C9-205°C                   | 0.0429 | 0.0595 | 27.87   |
| Steam/Water                | 0.0010 | 0.0046 |         |
| <b>Operation Condition</b> |        |        |         |
| Temperature (°C)           | 39.11  | 38.80  | -0.81   |

**Simulation Report – ECC 860 KTA**  
**Working Stage 6**

|                                     |          |          |      |
|-------------------------------------|----------|----------|------|
| Pressure (Kg/cm <sup>2</sup> gauge) | 0.95     | 0.95     | 0.00 |
| Molar Flow (kgmole/h)               | 308.03   | 313.10   | 1.62 |
| Mass Flow (kg/h)                    | 27601.03 | 28392.00 | 2.79 |
| Molecular Weight                    | 87.1449  | 88.78    | 1.84 |
| Total                               | 1.0000   | 1.0010   |      |

| 3049                                |          | Design   | %Error   |
|-------------------------------------|----------|----------|----------|
| Component (%mol)                    |          |          |          |
| Hydrogen                            | 0.0000   | 0.0000   |          |
| Carbon Monoxide                     | 0.0000   | 0.0000   |          |
| Carbon Dioxide                      | 0.0000   | 0.0000   |          |
| Hydrogen Sulphide                   | 0.0000   | 0.0000   |          |
| Methane                             | 0.0000   | 0.0000   |          |
| Acetylene                           | 0.0000   | 0.0000   |          |
| Ethylene                            | 0.0000   | 0.0000   |          |
| Ethane                              | 0.0000   | 0.0000   |          |
| Propadiene/Propyne                  | 0.0000   | 0.0000   |          |
| Propylene                           | 0.0000   | 0.0000   |          |
| Propane                             | 0.0000   | 0.0000   |          |
| Butadienes/C4Acetylenes             | 0.0079   | 0.0018   | -339.67  |
| Butylenes                           | 0.0080   | 0.0001   | -7906.10 |
| Butanes                             | 0.0037   | 0.0000   |          |
| C5-Hydrocarbons                     | 0.0214   | 0.0169   | -26.77   |
| C6-C8 Non-Aromatics                 | 0.1022   | 0.0805   | -26.91   |
| Benzene                             | 0.2081   | 0.2187   | 4.85     |
| Toluene                             | 0.3723   | 0.3830   | 2.79     |
| Xylenes/Ethylbenzene                | 0.0937   | 0.0972   | 3.55     |
| Styrene                             | 0.0555   | 0.0589   | 5.72     |
| C9-205°C                            | 0.1271   | 0.1430   | 11.09    |
| Steam/Water                         | 0.0000   | 0.0000   |          |
| Operation Condition                 |          |          |          |
| Temperature (°C)                    | 113.27   | 119.40   | 5.13     |
| Pressure (Kg/cm <sup>2</sup> gauge) | 0.87     | 0.87     | 0.00     |
| Molar Flow (kgmole/h)               | 325.35   | 332.00   | 2.00     |
| Mass Flow (kg/h)                    | 31054.11 | 31829.00 | 2.43     |
| Molecular Weight                    | 92.6291  | 0.00     | #DIV/0!  |
| Total                               | 1.0000   | 1.0001   |          |

| 3006             |        | Design | %Error |
|------------------|--------|--------|--------|
| Component (%mol) |        |        |        |
| Hydrogen         | 0.1492 | 0.1492 | 0.01   |
| Carbon Monoxide  | 0.0010 | 0.0010 | 0.85   |

**Simulation Report – ECC 860 KTA**  
**Working Stage 6**

|                                     |           |           |         |
|-------------------------------------|-----------|-----------|---------|
| Carbon Dioxide                      | 0.0003    | 0.0003    | 0.50    |
| Hydrogen Sulphide                   | 0.0000    | 0.0000    | #DIV/0! |
| Methane                             | 0.2645    | 0.2646    | 0.05    |
| Acetylene                           | 0.0051    | 0.0051    | 0.46    |
| Ethylene                            | 0.2788    | 0.2790    | 0.06    |
| Ethane                              | 0.0490    | 0.0490    | 0.06    |
| Propadiene/Propyne                  | 0.0046    | 0.0046    | 0.11    |
| Propylene                           | 0.1013    | 0.1014    | 0.07    |
| Propane                             | 0.0032    | 0.0032    | 0.26    |
| Butadienes/C4Acetylenes             | 0.0203    | 0.0204    | 0.55    |
| Butylenes                           | 0.0276    | 0.0276    | 0.15    |
| Butanes                             | 0.0090    | 0.0092    | 1.65    |
| C5-Hydrocarbons                     | 0.0164    | 0.0166    | 1.12    |
| C6-C8 Non-Aromatics                 | 0.0086    | 0.0090    | 4.70    |
| Benzene                             | 0.0212    | 0.0210    | -1.16   |
| Toluene                             | 0.0121    | 0.0115    | -5.53   |
| Xylenes/Ethylbenzene                | 0.0010    | 0.0010    | -0.01   |
| Styrene                             | 0.0004    | 0.0004    | -5.52   |
| C9-205°C                            | 0.0001    | 0.0003    | 66.83   |
| Steam/Water                         | 0.0262    | 0.0256    | -2.53   |
| <b>Operation Condition</b>          |           |           |         |
| Temperature (°C)                    | 41.00     | 41.00     | 0.00    |
| Pressure (Kg/cm <sup>2</sup> gauge) | 4.29      | 4.29      | 0.00    |
| Molar Flow (kgmole/h)               | 12554.80  | 12563.50  | 0.07    |
| Mass Flow (kg/h)                    | 340685.64 | 340689.00 | 0.00    |
| Molecular Weight                    | 28.2768   | 27.12     | -4.27   |
| Total                               | 1.0000    | 1.0000    |         |

| 3008                    |        | Design | %Error  |
|-------------------------|--------|--------|---------|
| Component (%mol)        |        |        |         |
| Hydrogen                | 0.1512 | 0.1516 | 0.24    |
| Carbon Monoxide         | 0.0010 | 0.0010 | -0.44   |
| Carbon Dioxide          | 0.0003 | 0.0004 | 24.36   |
| Hydrogen Sulphide       | 0.0000 | 0.0000 | #DIV/0! |
| Methane                 | 0.2680 | 0.2688 | 0.31    |
| Acetylene               | 0.0051 | 0.0052 | 1.00    |
| Ethylene                | 0.2837 | 0.2847 | 0.35    |
| Ethane                  | 0.0497 | 0.0498 | 0.28    |
| Propadiene/Propyne      | 0.0047 | 0.0047 | 0.52    |
| Propylene               | 0.1030 | 0.1034 | 0.39    |
| Propane                 | 0.0032 | 0.0032 | -1.37   |
| Butadienes/C4Acetylenes | 0.0207 | 0.0210 | 1.26    |
| Butylenes               | 0.0282 | 0.0284 | 0.87    |

**Simulation Report – ECC 860 KTA**  
**Working Stage 6**

|                                     |           |           |        |
|-------------------------------------|-----------|-----------|--------|
| Butanes                             | 0.0093    | 0.0093    | -0.07  |
| C5-Hydrocarbons                     | 0.0169    | 0.0173    | 2.21   |
| C6-C8 Non-Aromatics                 | 0.0080    | 0.0090    | 11.29  |
| Benzene                             | 0.0203    | 0.0201    | -1.02  |
| Toluene                             | 0.0078    | 0.0075    | -4.62  |
| Xylenes/Ethylbenzene                | 0.0003    | 0.0003    | 2.50   |
| Styrene                             | 0.0001    | 0.0001    | 6.34   |
| C9-205°C                            | 0.0000    | 0.0000    |        |
| Steam/Water                         | 0.0183    | 0.0142    | -28.53 |
| <b>Operation Condition</b>          |           |           |        |
| Temperature (°C)                    | 88.94     | 88.90     | -0.04  |
| Pressure (Kg/cm <sup>2</sup> gauge) | 9.56      | 9.56      | 0.00   |
| Molar Flow (kgmole/h)               | 12394.70  | 12371.10  | -0.19  |
| Mass Flow (kg/h)                    | 331526.19 | 331534.00 | 0.00   |
| Molecular Weight                    | 27.0568   | 27.77     | 2.57   |
| Total                               | 0.9998    | 1.0000    |        |

| 3028                       |        | Design | %Error  |
|----------------------------|--------|--------|---------|
| <b>Component (%mol)</b>    |        |        |         |
| Hydrogen                   | 0.0005 | 0.0009 | 49.23   |
| Carbon Monoxide            | 0.0000 | 0.0000 | #DIV/0! |
| Carbon Dioxide             | 0.0000 | 0.0000 | #DIV/0! |
| Hydrogen Sulphide          | 0.0000 | 0.0000 | #DIV/0! |
| Methane                    | 0.0066 | 0.0093 | 29.55   |
| Acetylene                  | 0.0006 | 0.0009 | 30.06   |
| Ethylene                   | 0.0253 | 0.0290 | 12.69   |
| Ethane                     | 0.0060 | 0.0071 | 16.14   |
| Propadiene/Propyne         | 0.0026 | 0.0035 | 25.58   |
| Propylene                  | 0.0387 | 0.0385 | -0.44   |
| Propane                    | 0.0012 | 0.0014 | 11.43   |
| Butadienes/C4Acetylenes    | 0.0250 | 0.0306 | 18.35   |
| Butylenes                  | 0.0312 | 0.0319 | 2.18    |
| Butanes                    | 0.0115 | 0.0104 | -10.35  |
| C5-Hydrocarbons            | 0.0467 | 0.0575 | 18.83   |
| C6-C8 Non-Aromatics        | 0.0938 | 0.1008 | 6.94    |
| Benzene                    | 0.2402 | 0.2515 | 4.48    |
| Toluene                    | 0.1650 | 0.1650 | 0.02    |
| Xylenes/Ethylbenzene       | 0.0084 | 0.0097 | 13.68   |
| Styrene                    | 0.0028 | 0.0034 | 16.83   |
| C9-205°C                   | 0.0003 | 0.0009 | 69.16   |
| Steam/Water                | 0.2937 | 0.2480 | -18.44  |
| <b>Operation Condition</b> |        |        |         |
| Temperature (°C)           | 46.37  | 40.80  | -13.66  |

**Simulation Report – ECC 860 KTA**  
**Working Stage 6**

|                                     |           |               |               |
|-------------------------------------|-----------|---------------|---------------|
| Pressure (Kg/cm <sup>2</sup> gauge) | 9.34      | 9.25          | -0.97         |
| Molar Flow (kgmole/h)               | 343.25    | 329.90        | -4.05         |
| Mass Flow (kg/h)                    | 20240.37  | 20205.00      | -0.18         |
| Molecular Weight                    | 60.8049   | 61.25         | 0.73          |
| Total                               | 1.0000    | 1.0003        |               |
| <b>2117</b>                         |           | <b>Design</b> | <b>%Error</b> |
| <b>Component (%mol)</b>             |           |               |               |
| Hydrogen                            | 0.1448    | 0.1448        | -0.02         |
| Carbon Monoxide                     | 0.0009    | 0.0009        | -0.02         |
| Carbon Dioxide                      | 0.0003    | 0.0003        | -0.02         |
| Hydrogen Sulphide                   | 0.0000    | 0.0000        | #DIV/0!       |
| Methane                             | 0.2517    | 0.2516        | -0.02         |
| Acetylene                           | 0.0051    | 0.0051        | -0.02         |
| Ethylene                            | 0.2803    | 0.2802        | -0.02         |
| Ethane                              | 0.0492    | 0.0492        | -0.02         |
| Propadiene/Propyne                  | 0.0046    | 0.0046        | -0.02         |
| Propylene                           | 0.1016    | 0.1016        | -0.02         |
| Propane                             | 0.0032    | 0.0032        | -0.02         |
| Butadienes/C4Acetylenes             | 0.0202    | 0.0202        | -0.02         |
| Butylenes                           | 0.0274    | 0.0274        | -0.02         |
| Butanes                             | 0.0090    | 0.0090        | -0.02         |
| C5-Hydrocarbons                     | 0.0158    | 0.0158        | -0.02         |
| C6-C8 Non-Aromatics                 | 0.0081    | 0.0051        | -58.86        |
| Benzene                             | 0.0191    | 0.0021        | -809.71       |
| Toluene                             | 0.0132    | 0.0009        | -1366.96      |
| Xylenes/Ethylbenzene                | 0.0026    | 0.0193        | 86.53         |
| Styrene                             | 0.0015    | 0.0132        | 88.63         |
| C9-205°C                            | 0.0016    | 0.0057        | 71.92         |
| Steam/Water                         | 0.0501    | 0.0398        | -25.88        |
| <b>Operation Condition</b>          |           |               |               |
| Temperature (°C)                    | 38.00     | 38.00         | 0.00          |
| Pressure (Kg/cm <sup>2</sup> gauge) | 0.56      | 0.56          | 0.00          |
| Molar Flow (kgmole/h)               | 12482.16  | 12497.00      | 0.12          |
| Mass Flow (kg/h)                    | 343763.00 | 343763.00     | 0.00          |
| Molecular Weight                    | 29.7010   | 29.69         | -0.04         |
| Total                               | 1.0103    | 1.0000        |               |

|                         |        |               |               |
|-------------------------|--------|---------------|---------------|
| <b>3025</b>             |        | <b>Design</b> | <b>%Error</b> |
| <b>Component (%mol)</b> |        |               |               |
| Hydrogen                | 0.0000 | 0.0000        |               |
| Carbon Monoxide         | 0.0000 | 0.0000        |               |
| Carbon Dioxide          | 0.0000 | 0.0000        |               |

**Simulation Report – ECC 860 KTA**  
**Working Stage 6**

|                                     |         |         |         |
|-------------------------------------|---------|---------|---------|
| Hydrogen Sulphide                   | 0.0000  | 0.0000  |         |
| Methane                             | 0.0001  | 0.0000  |         |
| Acetylene                           | 0.0000  | 0.0000  |         |
| Ethylene                            | 0.0002  | 0.0000  |         |
| Ethane                              | 0.0001  | 0.0000  |         |
| Propadiene/Propyne                  | 0.0000  | 0.0000  |         |
| Propylene                           | 0.0004  | 0.0001  |         |
| Propane                             | 0.0000  | 0.0000  |         |
| Butadienes/C4Acetylenes             | 0.0003  | 0.0001  |         |
| Butylenes                           | 0.0004  | 0.0001  |         |
| Butanes                             | 0.0001  | 0.0000  |         |
| C5-Hydrocarbons                     | 0.0007  | 0.0001  |         |
| C6-C8 Non-Aromatics                 | 0.0032  | 0.0007  | -357.23 |
| Benzene                             | 0.0046  | 0.0018  | -157.69 |
| Toluene                             | 0.0102  | 0.0039  | -162.58 |
| Xylenes/Ethylbenzene                | 0.0060  | 0.0021  | -184.48 |
| Styrene                             | 0.0044  | 0.0018  | -142.95 |
| C9-205°C                            | 0.0172  | 0.0041  | -320.28 |
| Steam/Water                         | 0.9499  | 0.9852  | 3.59    |
| <b>Operation Condition</b>          |         |         |         |
| Temperature (°C)                    | 36.90   | 36.90   | 0.00    |
| Pressure (Kg/cm <sup>2</sup> gauge) | 4.46    | 4.46    | 0.00    |
| Molar Flow (kgmole/h)               | 410.46  | 410.00  | -0.11   |
| Mass Flow (kg/h)                    | 7902.00 | 7902.00 | 0.00    |
| Molecular Weight                    | 26.3263 | 19.25   | -36.76  |
| Total                               | 0.9979  | 1.0000  |         |

| 3003                    |        | Design | %Error  |
|-------------------------|--------|--------|---------|
| Component (%mol)        |        |        |         |
| Hydrogen                | 0.1459 | 0.1466 | 0.48    |
| Carbon Monoxide         | 0.0010 | 0.0010 | 3.04    |
| Carbon Dioxide          | 0.0003 | 0.0003 | 2.75    |
| Hydrogen Sulphide       | 0.0000 | 0.0000 | #DIV/0! |
| Methane                 | 0.2586 | 0.2599 | 0.50    |
| Acetylene               | 0.0050 | 0.0050 | 0.81    |
| Ethylene                | 0.2725 | 0.2738 | 0.48    |
| Ethane                  | 0.0478 | 0.0480 | 0.32    |
| Propadiene/Propyne      | 0.0045 | 0.0045 | 0.61    |
| Propylene               | 0.0988 | 0.0993 | 0.51    |
| Propane                 | 0.0031 | 0.0031 | -0.37   |
| Butadienes/C4Acetylenes | 0.0196 | 0.0197 | 0.31    |
| Butylenes               | 0.0267 | 0.0268 | 0.38    |
| Butanes                 | 0.0088 | 0.0088 | 0.50    |

**Simulation Report – ECC 860 KTA**  
**Working Stage 6**

|                                     |           |           |        |
|-------------------------------------|-----------|-----------|--------|
| C5-Hydrocarbons                     | 0.0157    | 0.0158    | 0.86   |
| C6-C8 Non-Aromatics                 | 0.0078    | 0.0079    | 1.42   |
| Benzene                             | 0.0184    | 0.0187    | 1.37   |
| Toluene                             | 0.0125    | 0.0128    | 2.13   |
| Xylenes/Ethylbenzene                | 0.0023    | 0.0025    | 6.13   |
| Styrene                             | 0.0013    | 0.0015    | 11.63  |
| C9-205°C                            | 0.0010    | 0.0015    | 31.27  |
| Steam/Water                         | 0.0483    | 0.0425    | -13.76 |
| <b>Operation Condition</b>          |           |           |        |
| Temperature (°C)                    | 41.00     | 41.00     | 0.00   |
| Pressure (Kg/cm <sup>2</sup> gauge) | 1.80      | 1.80      | 0.00   |
| Molar Flow (kgmole/h)               | 12837.70  | 12786.30  | -0.40  |
| Mass Flow (kg/h)                    | 347354.00 | 343763.00 | -1.04  |
| Molecular Weight                    | 28.8936   | 29.24     | 1.18   |
| Total                               | 1.0000    | 1.0000    |        |

| 3042                                |        | Design | %Error |
|-------------------------------------|--------|--------|--------|
| <b>Component (%mol)</b>             |        |        |        |
| Hydrogen                            | 0.0002 | 0.0002 | 15.44  |
| Carbon Monoxide                     | 0.0000 | 0.0000 |        |
| Carbon Dioxide                      | 0.0000 | 0.0000 |        |
| Hydrogen Sulphide                   | 0.0000 | 0.0000 |        |
| Methane                             | 0.0026 | 0.0033 | 21.07  |
| Acetylene                           | 0.0003 | 0.0004 | 31.14  |
| Ethylene                            | 0.0108 | 0.0103 | -4.88  |
| Ethane                              | 0.0025 | 0.0025 | -1.78  |
| Propadiene/Propyne                  | 0.0012 | 0.0015 | 19.17  |
| Propylene                           | 0.0172 | 0.0136 | -26.46 |
| Propane                             | 0.0006 | 0.0005 | -11.51 |
| Butadienes/C4Acetylenes             | 0.0121 | 0.0126 | 3.98   |
| Butylenes                           | 0.0149 | 0.0122 | -22.38 |
| Butanes                             | 0.0055 | 0.0038 | -44.42 |
| C5-Hydrocarbons                     | 0.0239 | 0.0244 | 2.01   |
| C6-C8 Non-Aromatics                 | 0.0789 | 0.0708 | -11.41 |
| Benzene                             | 0.1879 | 0.1821 | -3.19  |
| Toluene                             | 0.2147 | 0.1988 | -7.98  |
| Xylenes/Ethylbenzene                | 0.0226 | 0.0223 | -1.44  |
| Styrene                             | 0.0098 | 0.0094 | -4.10  |
| C9-205°C                            | 0.0024 | 0.0048 | 50.46  |
| Steam/Water                         | 0.3920 | 0.4266 | 8.12   |
| <b>Operation Condition</b>          |        |        |        |
| Temperature (°C)                    | 43.26  | 38.10  | -13.54 |
| Pressure (Kg/cm <sup>2</sup> gauge) | 1.72   | 1.72   | 0.00   |



**Simulation Report – ECC 860 KTA**  
**Working Stage 6**

|                       |          |          |       |
|-----------------------|----------|----------|-------|
| Molar Flow (kgmole/h) | 519.71   | 539.00   | 3.58  |
| Mass Flow (kg/h)      | 29842.58 | 29810.00 | -0.11 |
| Molecular Weight      | 61.3662  | 61.36    | -0.01 |
| Total                 | 1.0000   | 1.0001   |       |

| 3037                                |          | Design   | %Error |
|-------------------------------------|----------|----------|--------|
| Component (%mol)                    |          |          |        |
| Hydrogen                            | 0.0001   | 0.0002   | 40.64  |
| Carbon Monoxide                     | 0.0000   | 0.0000   |        |
| Carbon Dioxide                      | 0.0000   | 0.0000   |        |
| Hydrogen Sulphide                   | 0.0000   | 0.0000   |        |
| Methane                             | 0.0017   | 0.0020   | 12.87  |
| Acetylene                           | 0.0002   | 0.0003   | 29.87  |
| Ethylene                            | 0.0089   | 0.0077   | -14.95 |
| Ethane                              | 0.0023   | 0.0017   | -34.74 |
| Propadiene/Propyne                  | 0.0011   | 0.0015   | 25.85  |
| Propylene                           | 0.0143   | 0.0100   | -43.00 |
| Propane                             | 0.0003   | 0.0003   | -8.80  |
| Butadienes/C4Acetylenes             | 0.0138   | 0.0107   | -28.84 |
| Butylenes                           | 0.0129   | 0.0114   | -13.40 |
| Butanes                             | 0.0089   | 0.0062   | -44.25 |
| C5-Hydrocarbons                     | 0.0215   | 0.0181   | -18.88 |
| C6-C8 Non-Aromatics                 | 0.1738   | 0.1444   | -20.34 |
| Benzene                             | 0.2447   | 0.2430   | -0.68  |
| Toluene                             | 0.3663   | 0.3848   | 4.80   |
| Xylenes/Ethylbenzene                | 0.0969   | 0.1149   | 15.66  |
| Styrene                             | 0.0276   | 0.0357   | 22.68  |
| C9-205°C                            | 0.0037   | 0.0070   | 46.77  |
| Steam/Water                         | 0.0009   | 0.0000   |        |
| <b>Operation Condition</b>          |          |          |        |
| Temperature (°C)                    | 107.00   | 107.00   | 0.00   |
| Pressure (Kg/cm <sup>2</sup> gauge) | 0.36     | 0.36     | 0.00   |
| Molar Flow (kgmole/h)               | 465.47   | 447.23   | -4.08  |
| Mass Flow (kg/h)                    | 40563.15 | 39704.00 | -2.16  |
| Molecular Weight                    | 87.1449  | 88.78    | 1.84   |
| Total                               | 1.0000   | 0.9999   |        |

| 3040             |        | Design | %Error |
|------------------|--------|--------|--------|
| Component (%mol) |        |        |        |
| Hydrogen         | 0.0000 | 0.0000 |        |
| Carbon Monoxide  | 0.0000 | 0.0000 |        |
| Carbon Dioxide   | 0.0000 | 0.0000 |        |

**Simulation Report – ECC 860 KTA**  
**Working Stage 6**

|                                     |          |          |          |
|-------------------------------------|----------|----------|----------|
| Hydrogen Sulphide                   | 0.0000   | 0.0000   |          |
| Methane                             | 0.0000   | 0.0000   |          |
| Acetylene                           | 0.0000   | 0.0000   |          |
| Ethylene                            | 0.0000   | 0.0000   | #DIV/0!  |
| Ethane                              | 0.0000   | 0.0000   |          |
| Propadiene/Propyne                  | 0.0000   | 0.0000   | #DIV/0!  |
| Propylene                           | 0.0000   | 0.0000   | #DIV/0!  |
| Propane                             | 0.0000   | 0.0000   |          |
| Butadienes/C4Acetylenes             | 0.0079   | 0.0018   | -339.67  |
| Butylenes                           | 0.0080   | 0.0001   | -7906.10 |
| Butanes                             | 0.0037   | 0.0000   | #DIV/0!  |
| C5-Hydrocarbons                     | 0.0214   | 0.0169   | -26.77   |
| C6-C8 Non-Aromatics                 | 0.1022   | 0.0805   | -26.91   |
| Benzene                             | 0.2081   | 0.2187   | 4.85     |
| Toluene                             | 0.3723   | 0.3830   | 2.79     |
| Xylenes/Ethylbenzene                | 0.0937   | 0.0972   | 3.55     |
| Styrene                             | 0.0555   | 0.0589   | 5.72     |
| C9-205°C                            | 0.1271   | 0.1430   | 11.09    |
| Steam/Water                         | 0.0000   | 0.0000   |          |
| <b>Operation Condition</b>          |          |          |          |
| Temperature (°C)                    | 113.41   | 119.90   | 5.41     |
| Pressure (Kg/cm <sup>2</sup> gauge) | 3.56     | 3.56     | 0.00     |
| Molar Flow (kgmole/h)               | 314.88   | 321.60   | 2.09     |
| Mass Flow (kg/h)                    | 30054.11 | 30829.00 | 2.51     |
| Molecular Weight                    | 92.6040  | 95.88    | 3.42     |
| Total                               | 1.0000   | 1.0001   |          |

| 3043                    |        | Design | %Error |
|-------------------------|--------|--------|--------|
| Component (%mol)        |        |        |        |
| Hydrogen                | 0.0005 | 0.0007 | 34.71  |
| Carbon Monoxide         | 0.0000 | 0.0000 |        |
| Carbon Dioxide          | 0.0000 | 0.0001 | 77.89  |
| Hydrogen Sulphide       | 0.0000 | 0.0000 |        |
| Methane                 | 0.0066 | 0.0093 | 29.51  |
| Acetylene               | 0.0006 | 0.0009 | 30.01  |
| Ethylene                | 0.0253 | 0.0290 | 12.63  |
| Ethane                  | 0.0060 | 0.0071 | 16.07  |
| Propadiene/Propyne      | 0.0026 | 0.0035 | 25.51  |
| Propylene               | 0.0387 | 0.0385 | -0.53  |
| Propane                 | 0.0012 | 0.0014 | 11.35  |
| Butadienes/C4Acetylenes | 0.0250 | 0.0306 | 18.27  |
| Butylenes               | 0.0312 | 0.0319 | 2.08   |
| Butanes                 | 0.0115 | 0.0104 | -10.46 |

**Simulation Report – ECC 860 KTA**  
**Working Stage 6**

|                                     |          |          |        |
|-------------------------------------|----------|----------|--------|
| C5-Hydrocarbons                     | 0.0467   | 0.0575   | 18.74  |
| C6-C8 Non-Aromatics                 | 0.0939   | 0.1008   | 6.87   |
| Benzene                             | 0.2404   | 0.2515   | 4.43   |
| Toluene                             | 0.1648   | 0.1650   | 0.11   |
| Xylenes/Ethylbenzene                | 0.0084   | 0.0097   | 13.87  |
| Styrene                             | 0.0028   | 0.0034   | 17.04  |
| C9-205°C                            | 0.0003   | 0.0009   | 69.25  |
| Steam/Water                         | 0.2935   | 0.2480   | -18.35 |
| <b>Operation Condition</b>          |          |          |        |
| Temperature (°C)                    | 44.08    | 38.10    | -15.68 |
| Pressure (Kg/cm <sup>2</sup> gauge) | 4.20     | 4.20     | 0.00   |
| Molar Flow (kgmole/h)               | 343.16   | 329.90   | -4.02  |
| Mass Flow (kg/h)                    | 20236.94 | 20205.00 | -0.16  |
| Molecular Weight                    | 63.7403  | 63.74    | 0.00   |
| Total                               | 1.0000   | 1.0002   |        |

| 3009                                |        | Design | %Error  |
|-------------------------------------|--------|--------|---------|
| <b>Component (%mol)</b>             |        |        |         |
| Hydrogen                            | 0.1512 | 0.1516 | 0.24    |
| Carbon Monoxide                     | 0.0010 | 0.0010 | -0.44   |
| Carbon Dioxide                      | 0.0003 | 0.0004 | 24.36   |
| Hydrogen Sulphide                   | 0.0000 | 0.0000 | #DIV/0! |
| Methane                             | 0.2680 | 0.2688 | 0.31    |
| Acetylene                           | 0.0051 | 0.0052 | 1.00    |
| Ethylene                            | 0.2837 | 0.2847 | 0.35    |
| Ethane                              | 0.0497 | 0.0498 | 0.28    |
| Propadiene/Propyne                  | 0.0047 | 0.0047 | 0.52    |
| Propylene                           | 0.1030 | 0.1034 | 0.39    |
| Propane                             | 0.0032 | 0.0032 | -1.37   |
| Butadienes/C4Acetylenes             | 0.0207 | 0.0210 | 1.26    |
| Butylenes                           | 0.0282 | 0.0284 | 0.87    |
| Butanes                             | 0.0093 | 0.0093 | -0.07   |
| C5-Hydrocarbons                     | 0.0169 | 0.0173 | 2.21    |
| C6-C8 Non-Aromatics                 | 0.0080 | 0.0090 | 11.29   |
| Benzene                             | 0.0203 | 0.0201 | -1.02   |
| Toluene                             | 0.0078 | 0.0075 | -4.62   |
| Xylenes/Ethylbenzene                | 0.0003 | 0.0003 | 2.50    |
| Styrene                             | 0.0001 | 0.0001 | 6.34    |
| C9-205°C                            | 0.0000 | 0.0000 |         |
| Steam/Water                         | 0.0183 | 0.0142 | -28.53  |
| <b>Operation Condition</b>          |        |        |         |
| Temperature (°C)                    | 41.00  | 41.00  | 0.00    |
| Pressure (Kg/cm <sup>2</sup> gauge) | 9.34   | 9.34   | 0.00    |

**Simulation Report – ECC 860 KTA**  
**Working Stage 6**

|                       |           |           |       |
|-----------------------|-----------|-----------|-------|
| Molar Flow (kgmole/h) | 12394.70  | 12371.10  | -0.19 |
| Mass Flow (kg/h)      | 331526.19 | 331534.00 | 0.00  |
| Molecular Weight      | 27.0568   | 27.77     | 2.57  |
| Total                 | 0.9998    | 1.0000    |       |

| 3010                                |           | Design    | %Error  |
|-------------------------------------|-----------|-----------|---------|
| Component (%mol)                    |           |           |         |
| Hydrogen                            | 0.1558    | 0.1516    | -2.80   |
| Carbon Monoxide                     | 0.0010    | 0.0010    | -3.01   |
| Carbon Dioxide                      | 0.0003    | 0.0004    | 22.57   |
| Hydrogen Sulphide                   | 0.0000    | 0.0000    | #DIV/0! |
| Methane                             | 0.2749    | 0.2688    | -2.28   |
| Acetylene                           | 0.0053    | 0.0052    | -1.20   |
| Ethylene                            | 0.2903    | 0.2847    | -1.96   |
| Ethane                              | 0.0508    | 0.0498    | -1.95   |
| Propadiene/Propyne                  | 0.0047    | 0.0047    | -0.47   |
| Propylene                           | 0.1062    | 0.1034    | -2.73   |
| Propane                             | 0.0033    | 0.0032    | -3.04   |
| Butadienes/C4Acetylenes             | 0.0206    | 0.0210    | 2.09    |
| Butylenes                           | 0.0280    | 0.0284    | 1.44    |
| Butanes                             | 0.0092    | 0.0093    | 0.86    |
| C5-Hydrocarbons                     | 0.0160    | 0.0173    | 7.36    |
| C6-C8 Non-Aromatics                 | 0.0055    | 0.0090    | 38.61   |
| Benzene                             | 0.0140    | 0.0201    | 30.33   |
| Toluene                             | 0.0034    | 0.0075    | 55.17   |
| Xylenes/Ethylbenzene                | 0.0001    | 0.0003    | 79.27   |
| Styrene                             | 0.0000    | 0.0001    |         |
| C9-205°C                            | 0.0000    | 0.0000    |         |
| Steam/Water                         | 0.0104    | 0.0142    | 26.92   |
| <b>Operation Condition</b>          |           |           |         |
| Temperature (°C)                    | 46.37     | 40.90     | -13.38  |
| Pressure (Kg/cm <sup>2</sup> gauge) | 9.25      | 9.25      | 0.00    |
| Molar Flow (kgmole/h)               | 12083.65  | 12073.40  | -0.08   |
| Mass Flow (kg/h)                    | 312208.82 | 312251.00 | 0.01    |
| Molecular Weight                    | 25.9459   | 26.50     | 2.09    |
| Total                               | 0.9998    | 1.0000    |         |
| 1230                                |           | Design    | %Error  |
| Component (%mol)                    |           |           |         |
| Hydrogen                            | 0.4168    | 0.4178    | 0.25    |
| Carbon Monoxide                     | 0.0000    | 0.0000    |         |
| Carbon Dioxide                      | 0.0000    | 0.0000    |         |
| Hydrogen Sulphide                   | 0.0000    | 0.0000    |         |

**Simulation Report – ECC 860 KTA**  
**Working Stage 6**

|                                     |         |        |          |
|-------------------------------------|---------|--------|----------|
| Methane                             | 0.2814  | 0.2821 | 0.25     |
| C2-C4 Hydrocarbons                  | 0.0533  | 0.0533 | 0.06     |
| C5-Hydrocarbons                     | 0.2295  | 0.2247 | -2.15    |
| C6-C8 Non-Aromatics                 | 0.0059  | 0.0121 | 51.36    |
| Benzene                             | 0.0080  | 0.0005 | -1496.01 |
| Toluene                             | 0.0017  | 0.0001 | -1595.76 |
| Xylenes/Ethylbenzene                | 0.0002  | 0.0076 | 97.37    |
| Styrene                             | 0.0021  | 0.0016 |          |
| C9-205°C                            | 0.0000  | 0.0002 | 100.00   |
| Steam/Water                         | 0.0058  | 0.0000 |          |
|                                     |         |        |          |
|                                     |         |        |          |
|                                     |         |        |          |
|                                     |         |        |          |
|                                     |         |        |          |
|                                     |         |        |          |
|                                     |         |        |          |
|                                     |         |        |          |
| <b>Operation Condition</b>          |         |        |          |
| Temperature (°C)                    | 41.80   | 41.40  | -0.97    |
| Pressure (Kg/cm <sup>2</sup> gauge) | 25.52   | 25.52  | 0.00     |
| Molar Flow (kgmole/h)               | 17.82   | 18.60  | 4.21     |
| Mass Flow (kg/h)                    | 474.00  | 474.00 | 0.00     |
| Molecular Weight                    | 25.6205 | 25.62  | 0.00     |
| Total                               | 1.0046  | 1.0000 |          |

| 3001                    |        | Design | %Error  |
|-------------------------|--------|--------|---------|
| Component (%mol)        |        |        |         |
| Hydrogen                | 0.1452 | 0.1466 | 0.93    |
| Carbon Monoxide         | 0.0019 | 0.0010 | -89.92  |
| Carbon Dioxide          | 0.0005 | 0.0003 | -61.59  |
| Hydrogen Sulphide       | 0.0001 | 0.0000 | #DIV/0! |
| Methane                 | 0.2331 | 0.2599 | 10.31   |
| Acetylene               | 0.0044 | 0.0050 | 12.74   |
| Ethylene                | 0.2594 | 0.2738 | 5.27    |
| Ethane                  | 0.0493 | 0.0480 | -2.61   |
| Propadiene/Propyne      | 0.0047 | 0.0045 | -3.40   |
| Propylene               | 0.0920 | 0.0993 | 7.37    |
| Propane                 | 0.0021 | 0.0031 | 31.20   |
| Butadienes/C4Acetylenes | 0.0240 | 0.0197 | -22.00  |
| Butylenes               | 0.0248 | 0.0268 | 7.42    |
| Butanes                 | 0.0148 | 0.0088 | -68.75  |
| C5-Hydrocarbons         | 0.0149 | 0.0158 | 5.46    |

**Simulation Report – ECC 860 KTA**  
**Working Stage 6**

|                                     |           |           |         |
|-------------------------------------|-----------|-----------|---------|
| C6-C8 Non-Aromatics                 | 0.0182    | 0.0079    | -129.94 |
| Benzene                             | 0.0252    | 0.0187    | -34.68  |
| Toluene                             | 0.0209    | 0.0128    | -63.47  |
| Xylenes/Ethylbenzene                | 0.0056    | 0.0025    | -122.15 |
| Styrene                             | 0.0017    | 0.0015    | -10.01  |
| C9-205°C                            | 0.0003    | 0.0015    | 80.90   |
| Steam/Water                         | 0.0570    | 0.0425    | -34.17  |
| <b>Operation Condition</b>          |           |           |         |
| Temperature (°C)                    | 38.01     | 36.80     | -3.28   |
| Pressure (Kg/cm <sup>2</sup> gauge) | 0.35      | 0.45      | 22.22   |
| Molar Flow (kgmole/h)               | 12837.70  | 12786.30  | -0.40   |
| Mass Flow (kg/h)                    | 347354.00 | 343763.00 | -1.04   |
| Molecular Weight                    | 29.1090   | 29.24     | 0.45    |
| Total                               | 1.0000    | 1.0000    |         |

| 3004                                |          | Design   | %Error  |
|-------------------------------------|----------|----------|---------|
| <b>Component (%mol)</b>             |          |          |         |
| Hydrogen                            | 0.1492   | 0.1492   | 0.01    |
| Carbon Monoxide                     | 0.0010   | 0.0010   | 0.85    |
| Carbon Dioxide                      | 0.0003   | 0.0003   | 0.50    |
| Hydrogen Sulphide                   | 0.0000   | 0.0000   | #DIV/0! |
| Methane                             | 0.2645   | 0.2646   | 0.05    |
| Acetylene                           | 0.0051   | 0.0051   | 0.46    |
| Ethylene                            | 0.2788   | 0.2790   | 0.06    |
| Ethane                              | 0.0490   | 0.0490   | 0.06    |
| Propadiene/Propyne                  | 0.0046   | 0.0046   | 0.11    |
| Propylene                           | 0.1013   | 0.1014   | 0.07    |
| Propane                             | 0.0032   | 0.0032   | 0.26    |
| Butadienes/C4Acetylenes             | 0.0203   | 0.0204   | 0.55    |
| Butylenes                           | 0.0276   | 0.0276   | 0.15    |
| Butanes                             | 0.0090   | 0.0092   | 1.65    |
| C5-Hydrocarbons                     | 0.0164   | 0.0166   | 1.12    |
| C6-C8 Non-Aromatics                 | 0.0086   | 0.0090   | 4.70    |
| Benzene                             | 0.0212   | 0.0210   | -1.16   |
| Toluene                             | 0.0121   | 0.0115   | -5.53   |
| Xylenes/Ethylbenzene                | 0.0010   | 0.0010   | -0.01   |
| Styrene                             | 0.0004   | 0.0004   | -5.52   |
| C9-205°C                            | 0.0001   | 0.0003   |         |
| Steam/Water                         | 0.0262   | 0.0256   | -2.53   |
| <b>Operation Condition</b>          |          |          |         |
| Temperature (°C)                    | 39.34    | 39.00    | -0.86   |
| Pressure (Kg/cm <sup>2</sup> gauge) | 1.72     | 1.72     | 0.00    |
| Molar Flow (kgmole/h)               | 12554.80 | 12563.50 | 0.07    |

**Simulation Report – ECC 860 KTA**  
**Working Stage 6**

|                  |           |           |       |
|------------------|-----------|-----------|-------|
| Mass Flow (kg/h) | 340685.64 | 340689.00 | 0.00  |
| Molecular Weight | 28.2768   | 27.12     | -4.27 |
| Total            | 1.0000    | 1.0000    |       |

| 3036                                |          | Design   | %Error  |
|-------------------------------------|----------|----------|---------|
| Component (%mol)                    |          |          |         |
| Hydrogen                            | 0.0001   | 0.0003   | 55.26   |
| Carbon Monoxide                     | 0.0000   | 0.0000   |         |
| Carbon Dioxide                      | 0.0000   | 0.0000   |         |
| Hydrogen Sulphide                   | 0.0000   | 0.0000   |         |
| Methane                             | 0.0022   | 0.0009   | -146.47 |
| Acetylene                           | 0.0003   | 0.0002   | -26.30  |
| Ethylene                            | 0.0097   | 0.0047   | -105.68 |
| Ethane                              | 0.0023   | 0.0012   | -94.87  |
| Propadiene/Propyne                  | 0.0012   | 0.0012   | 2.88    |
| Propylene                           | 0.0163   | 0.0084   | -93.62  |
| Propane                             | 0.0005   | 0.0003   | -78.74  |
| Butadienes/C4Acetylenes             | 0.0119   | 0.0097   | -23.06  |
| Butylenes                           | 0.0147   | 0.0089   | -64.75  |
| Butanes                             | 0.0054   | 0.0028   | -92.37  |
| C5-Hydrocarbons                     | 0.0242   | 0.0196   | -23.36  |
| C6-C8 Non-Aromatics                 | 0.1081   | 0.0856   | -26.27  |
| Benzene                             | 0.2199   | 0.2321   | 5.27    |
| Toluene                             | 0.3896   | 0.4025   | 3.19    |
| Xylenes/Ethylbenzene                | 0.0952   | 0.0992   | 4.03    |
| Styrene                             | 0.0545   | 0.0583   | 6.44    |
| C9-205°C                            | 0.0429   | 0.0595   | 27.87   |
| Steam/Water                         | 0.0010   | 0.0046   |         |
| Operation Condition                 |          |          |         |
| Temperature (°C)                    | 39.34    | 38.90    | -1.12   |
| Pressure (Kg/cm <sup>2</sup> gauge) | 1.72     | 1.72     | 0.00    |
| Molar Flow (kgmole/h)               | 308.03   | 313.10   | 1.62    |
| Mass Flow (kg/h)                    | 27601.03 | 28392.00 | 2.79    |
| Molecular Weight                    | 87.1449  | 88.78    | 1.84    |
| Total                               | 1.0000   | 1.0000   |         |

| 3038              |        | Design | %Error   |
|-------------------|--------|--------|----------|
| Component (%mol)  |        |        |          |
| Hydrogen          | 0.0059 | 0.0004 | -1374.71 |
| Carbon Monoxide   | 0.0000 | 0.0000 |          |
| Carbon Dioxide    | 0.0002 | 0.0001 | -99.96   |
| Hydrogen Sulphide | 0.0001 | 0.0000 |          |

**Simulation Report – ECC 860 KTA**  
**Working Stage 6**

|                                     |         |        |          |
|-------------------------------------|---------|--------|----------|
| Methane                             | 0.0203  | 0.0043 | -372.00  |
| Acetylene                           | 0.0043  | 0.0006 | -616.52  |
| Ethylene                            | 0.1002  | 0.0162 | -518.39  |
| Ethane                              | 0.0263  | 0.0035 | -651.28  |
| Propadiene/Propyne                  | 0.0244  | 0.0030 | -713.17  |
| Propylene                           | 0.1805  | 0.0206 | -776.04  |
| Propane                             | 0.0069  | 0.0005 | -1279.72 |
| Butadienes/C4Acetylenes             | 0.1659  | 0.0212 | -682.39  |
| Butylenes                           | 0.1865  | 0.0224 | -732.42  |
| Butanes                             | 0.0579  | 0.0123 | -370.64  |
| C5-Hydrocarbons                     | 0.0418  | 0.0336 | -24.38   |
| C6-C8 Non-Aromatics                 | 0.0208  | 0.1780 | 88.32    |
| Benzene                             | 0.0519  | 0.3021 | 82.82    |
| Toluene                             | 0.0296  | 0.3090 | 90.42    |
| Xylenes/Ethylbenzene                | 0.0028  | 0.0555 | 94.96    |
| Styrene                             | 0.0012  | 0.0148 | 91.89    |
| C9-205°C                            | 0.0006  | 0.0018 | 66.67    |
| Steam/Water                         | 0.0721  | 0.0000 |          |
| <b>Operation Condition</b>          |         |        |          |
| Temperature (°C)                    | 50.70   | 50.70  | 0.00     |
| Pressure (Kg/cm <sup>2</sup> gauge) | 0.77    | 0.77   | 0.00     |
| Molar Flow (kgmole/h)               | 15.20   | 15.20  | -0.02    |
| Mass Flow (kg/h)                    | 748.00  | 748.00 | 0.00     |
| Molecular Weight                    | 83.6772 | 83.61  | -0.08    |
| Total                               | 1.0000  | 0.9999 |          |

| <b>3041</b>             |        | <b>Design</b> | <b>%Error</b> |
|-------------------------|--------|---------------|---------------|
| <b>Component (%mol)</b> |        |               |               |
| Hydrogen                | 0.0000 | 0.0000        |               |
| Carbon Monoxide         | 0.0000 | 0.0000        |               |
| Carbon Dioxide          | 0.0000 | 0.0000        |               |
| Hydrogen Sulphide       | 0.0000 | 0.0000        |               |
| Methane                 | 0.0000 | 0.0000        |               |
| Acetylene               | 0.0000 | 0.0000        |               |
| Ethylene                | 0.0000 | 0.0000        | #DIV/0!       |
| Ethane                  | 0.0000 | 0.0000        |               |
| Propadiene/Propyne      | 0.0000 | 0.0000        | #DIV/0!       |
| Propylene               | 0.0000 | 0.0000        | #DIV/0!       |
| Propane                 | 0.0000 | 0.0000        |               |
| Butadienes/C4Acetylenes | 0.0018 | 0.0018        | 0.00          |
| Butylenes               | 0.0001 | 0.0001        | 0.00          |
| Butanes                 | 0.0000 | 0.0000        | #DIV/0!       |
| C5-Hydrocarbons         | 0.0169 | 0.0169        | 0.00          |



**Simulation Report – ECC 860 KTA**  
**Working Stage 6**

|                                     |         |         |       |
|-------------------------------------|---------|---------|-------|
| C6-C8 Non-Aromatics                 | 0.0804  | 0.0805  | 0.12  |
| Benzene                             | 0.2187  | 0.2187  | 0.00  |
| Toluene                             | 0.3830  | 0.3830  | 0.00  |
| Xylenes/Ethylbenzene                | 0.0972  | 0.0972  | 0.00  |
| Styrene                             | 0.0589  | 0.0589  | 0.00  |
| C9-205°C                            | 0.1394  | 0.1430  | 2.52  |
| Steam/Water                         | 0.0000  | 0.0000  |       |
| <b>Operation Condition</b>          |         |         |       |
| Temperature (°C)                    | 119.90  | 119.90  | 0.00  |
| Pressure (Kg/cm <sup>2</sup> gauge) | 0.97    | 0.97    | 0.00  |
| Molar Flow (kgmole/h)               | 10.43   | 10.40   | -0.29 |
| Mass Flow (kg/h)                    | 1000.00 | 1000.00 | 0.00  |
| Molecular Weight                    | 92.6040 | 95.88   | 3.42  |
| Total                               | 0.9964  | 1.0001  |       |

| 3007                                |          | Design   | %Error  |
|-------------------------------------|----------|----------|---------|
| <b>Component (%mol)</b>             |          |          |         |
| Hydrogen                            | 0.1512   | 0.1516   | 0.24    |
| Carbon Monoxide                     | 0.0010   | 0.0010   | -0.44   |
| Carbon Dioxide                      | 0.0003   | 0.0004   | 24.36   |
| Hydrogen Sulphide                   | 0.0000   | 0.0000   | #DIV/0! |
| Methane                             | 0.2680   | 0.2688   | 0.31    |
| Acetylene                           | 0.0051   | 0.0052   | 1.00    |
| Ethylene                            | 0.2837   | 0.2847   | 0.35    |
| Ethane                              | 0.0497   | 0.0498   | 0.28    |
| Propadiene/Propyne                  | 0.0047   | 0.0047   | 0.52    |
| Propylene                           | 0.1030   | 0.1034   | 0.39    |
| Propane                             | 0.0032   | 0.0032   | -1.37   |
| Butadienes/C4Acetylenes             | 0.0207   | 0.0210   | 1.26    |
| Butylenes                           | 0.0282   | 0.0284   | 0.87    |
| Butanes                             | 0.0093   | 0.0093   | -0.07   |
| C5-Hydrocarbons                     | 0.0169   | 0.0173   | 2.21    |
| C6-C8 Non-Aromatics                 | 0.0080   | 0.0090   | 11.29   |
| Benzene                             | 0.0203   | 0.0201   | -1.02   |
| Toluene                             | 0.0078   | 0.0075   | -4.62   |
| Xylenes/Ethylbenzene                | 0.0003   | 0.0003   | 2.50    |
| Styrene                             | 0.0001   | 0.0001   | 6.34    |
| C9-205°C                            | 0.0000   | 0.0000   |         |
| Steam/Water                         | 0.0183   | 0.0142   | -28.53  |
| <b>Operation Condition</b>          |          |          |         |
| Temperature (°C)                    | 44.42    | 39.70    | -11.90  |
| Pressure (Kg/cm <sup>2</sup> gauge) | 4.20     | 4.20     | 0.00    |
| Molar Flow (kgmole/h)               | 12394.70 | 12371.10 | -0.19   |

**Simulation Report – ECC 860 KTA**  
**Working Stage 6**

|                  |           |           |      |
|------------------|-----------|-----------|------|
| Mass Flow (kg/h) | 331526.19 | 331534.00 | 0.00 |
| Molecular Weight | 26.9521   | 27.77     | 2.95 |
| Total            | 0.9998    | 1.0000    |      |

| 4522                                |         | Design | %Error  |
|-------------------------------------|---------|--------|---------|
| Component (%mol)                    |         |        |         |
| Hydrogen                            | 0.2723  | 0.2717 | -0.21   |
| Carbon Monoxide                     | 0.0000  | 0.0000 |         |
| Carbon Dioxide                      | 0.0000  | 0.0000 |         |
| Hydrogen Sulphide                   | 0.0000  | 0.0000 |         |
| Methane                             | 0.1241  | 0.0971 | -27.79  |
| Acetylene                           | 0.0000  | 0.0000 |         |
| Ethylene                            | 0.0000  | 0.0000 |         |
| Ethane                              | 0.0039  | 0.0008 | -387.45 |
| Propadiene/Propyne                  | 0.0000  | 0.0000 |         |
| Propylene                           | 0.5984  | 0.6284 | 4.77    |
| Propane                             | 0.0013  | 0.0019 | 31.59   |
| Butadienes/C4Acetylenes             | 0.0000  | 0.0000 |         |
| Butylenes                           | 0.0000  | 0.0000 |         |
| Butanes                             | 0.0000  | 0.0000 |         |
| C5-Hydrocarbons                     | 0.0000  | 0.0000 |         |
| C6-C8 Non-Aromatics                 | 0.0000  | 0.0000 |         |
| Benzene                             | 0.0000  | 0.0000 |         |
| Toluene                             | 0.0000  | 0.0000 |         |
| Xylenes/Ethylbenzene                | 0.0000  | 0.0000 |         |
| Styrene                             | 0.0000  | 0.0000 |         |
| C9-205°C                            | 0.0000  | 0.0000 |         |
| Steam/Water                         | 0.0000  | 0.0000 |         |
| <b>Operation Condition</b>          |         |        |         |
| Temperature (°C)                    | 8.20    | 10.00  | 18.00   |
| Pressure (Kg/cm <sup>2</sup> gauge) | 9.47    | 9.47   | 0.00    |
| Molar Flow (kgmole/h)               | 21.26   | 47.00  | 54.77   |
| Mass Flow (kg/h)                    | 593.00  | 632.00 | 6.17    |
| Molecular Weight                    | 27.8969 | 27.90  | 0.01    |
| Total                               | 1.0000  | 0.9999 |         |

| 3011              |        | Design | %Error  |
|-------------------|--------|--------|---------|
| Component (%mol)  |        |        |         |
| Hydrogen          | 0.1558 | 0.1516 | -2.80   |
| Carbon Monoxide   | 0.0010 | 0.0010 | -3.01   |
| Carbon Dioxide    | 0.0003 | 0.0004 | 22.57   |
| Hydrogen Sulphide | 0.0000 | 0.0000 | #DIV/0! |

**Simulation Report – ECC 860 KTA**  
**Working Stage 6**

---

|                                     |           |           |       |
|-------------------------------------|-----------|-----------|-------|
| Methane                             | 0.2749    | 0.2688    | -2.28 |
| Acetylene                           | 0.0053    | 0.0052    | -1.20 |
| Ethylene                            | 0.2903    | 0.2847    | -1.96 |
| Ethane                              | 0.0508    | 0.0498    | -1.95 |
| Propadiene/Propyne                  | 0.0047    | 0.0047    | -0.47 |
| Propylene                           | 0.1062    | 0.1034    | -2.73 |
| Propane                             | 0.0033    | 0.0032    | -3.04 |
| Butadienes/C4Acetylenes             | 0.0206    | 0.0210    | 2.09  |
| Butylenes                           | 0.0280    | 0.0284    | 1.44  |
| Butanes                             | 0.0092    | 0.0093    | 0.86  |
| C5-Hydrocarbons                     | 0.0160    | 0.0173    | 7.36  |
| C6-C8 Non-Aromatics                 | 0.0055    | 0.0090    | 38.61 |
| Benzene                             | 0.0140    | 0.0201    | 30.33 |
| Toluene                             | 0.0034    | 0.0075    | 55.17 |
| Xylenes/Ethylbenzene                | 0.0001    | 0.0003    | 79.27 |
| Styrene                             | 0.0000    | 0.0001    |       |
| C9-205°C                            | 0.0000    | 0.0000    |       |
| Steam/Water                         | 0.0104    | 0.0142    | 26.92 |
| <b>Operation Condition</b>          |           |           |       |
| Temperature (°C)                    | 46.00     | 46.00     | 0.00  |
| Pressure (Kg/cm <sup>2</sup> gauge) | 9.11      | 9.11      | 0.00  |
| Molar Flow (kgmole/h)               | 12083.65  | 12073.40  | -0.08 |
| Mass Flow (kg/h)                    | 312208.82 | 312251.00 | 0.01  |
| Molecular Weight                    | 26.0401   | 26.50     | 1.74  |
| Total                               | 0.9998    | 1.0000    |       |

**Simulation Report – ECC 860 KTA**  
**Working Stage 6**

---

**A.2. Stage 2**

**Table A.2.1. Stage 2 Stream & Composition Properties**

|                      | 3011         |              |        | 3306          |              |        | 3301         |              |        |
|----------------------|--------------|--------------|--------|---------------|--------------|--------|--------------|--------------|--------|
|                      | design       | simulation   | %error | design        | simulation   | %error | design       | simulation   | %error |
| Hydrogen             | 0.1561       | 0.1561       | 0.00   | 0             | 0            |        | 0            | 0            |        |
| Carbon-Monoxide      | 0.0011       | 0.0011       | 0.00   | 0             | 0            |        | 0            | 0            |        |
| Carbon-Dioxide       | 0.0004       | 0.0004       | 0.00   | 0             | 0            |        | 0            | 0            |        |
| Hydrogen-Sulfide     | 0            | 0            |        | 0             | 0            |        | 0            | 0            |        |
| Methane              | 0.2755       | 0.2755       | 0.00   | 0             | 0            |        | 0            | 0            |        |
| Acetylene            | 0.0053       | 0.0053       | 0.00   | 0             | 0            |        | 0            | 0            |        |
| Ethylene             | 0.2909       | 0.2909       | 0.00   | 0             | 0            |        | 0            | 0            |        |
| Ethane               | 0.0509       | 0.0509       | 0.00   | 0             | 0            |        | 0            | 0            |        |
| Propadiene           | 0.0048       | 0.0048       | 0.00   | 0             | 0            |        | 0            | 0            |        |
| Propylene            | 0.1066       | 0.1066       | 0.00   | 0             | 0            |        | 0            | 0            |        |
| Propane              | 0.0033       | 0.0033       | 0.00   | 0             | 0            |        | 0            | 0            |        |
| 1,3-Butadiene        | 0.0206       | 0.0206       | 0.00   | 0             | 0            |        | 0            | 0            |        |
| 1-Butene             | 0.0282       | 0.0282       | 0.00   | 0             | 0            |        | 0            | 0            |        |
| n-Butane             | 0.0093       | 0.0093       | 0.00   | 0             | 0            |        | 0            | 0            |        |
| 2-Methyl-Butane      | 0.0162       | 0.0162       | 0.00   | 0             | 0            |        | 0            | 0            |        |
| 1-Hexyne             | 0.0047       | 0.0047       | 0.00   | 0             | 0            |        | 0            | 0            |        |
| n-Heptane            | 0.0013       | 0.0013       | 0.00   | 0             | 0            |        | 0            | 0            |        |
| n-Octane             | 0.0001       | 0.0001       | 0.00   | 0             | 0            |        | 0            | 0            |        |
| Benzene              | 0.0137       | 0.0137       | 0.00   | 0             | 0            |        | 0            | 0            |        |
| Toluene              | 0.0031       | 0.0031       | 0.00   | 0             | 0            |        | 0            | 0            |        |
| P-Xylene             | 0.0001       | 0.0001       | 0.00   | 0             | 0            |        | 0            | 0            |        |
| Ethylbenzene         | 0            | 0            |        | 0             | 0            |        | 0            | 0            |        |
| Styrene              | 0            | 0            |        | 0             | 0            |        | 0            | 0            |        |
| M-Methyl-Styrene     | 0            | 0            |        | 0             | 0            |        | 0            | 0            |        |
| n-Decane             | 0            | 0            |        | 0             | 0            |        | 0            | 0            |        |
| n-Undecane           | 0            | 0            |        | 0             | 0            |        | 0            | 0            |        |
| n-Dodecane           | 0            | 0            |        | 0             | 0            |        | 0            | 0            |        |
| n-Hexadecane         | 0            | 0            |        | 0             | 0            |        | 0            | 0            |        |
| Sodium-Hydroxide     | 0            | 0            |        | 0.0072        | 0.0000       | 100    | 0.0477       | 0.0477       | 0.00   |
| Sodium-Carbonate     | 0            | 0            |        | 0.0182        | 0.0079       | 56.76  | 0            | 0            |        |
| Sodium-Sulfide       | 0            | 0            |        | 0.0023        | 0.0000       | 100    | 0            | 0            |        |
| Water                | 0.0076       | 0.0076       | 0.00   | 0.9724        | 0.9921       | 2.03   | 0.9523       | 0.9523       | 0.00   |
| Nitrogen             | 0.0002       | 0.0002       | 0.02   | 0             | 0            |        | 0            | 0            |        |
| wash gasoline        |              |              |        |               |              |        |              |              |        |
| <b>total</b>         | <b>1.000</b> | <b>1.000</b> |        | <b>1.0001</b> | <b>1.000</b> |        | <b>1.000</b> | <b>1.000</b> |        |
| Mass flow (kg/h)     | 312251       | 312251       | 0.00   | 4747          | 4747.258     | 0.01   | 4581         | 4581         | 0.00   |
| Molar flow (kgmol/h) | 12073.4      | 12066.046    | 0.06   | 238.5         | 253.761      | 6.40   | 240.3        | 240.3        | 0.00   |
| Temperature (C)      | 46           | 46           | 0.00   | 46            | 46           | 0.00   | 46           | 46           | 0.00   |
| Pressure (kg/cm2_g)  | 9.11         | 9.11         | 0.00   | 9.53          | 9.110        | 4.41   | 9.34         | 9.34         | 0.00   |

# Simulation Report – ECC 860 KTA

## Working Stage 6

|                      | 3307         |              |        | 3308         |              |        | 3012          |              |        |
|----------------------|--------------|--------------|--------|--------------|--------------|--------|---------------|--------------|--------|
|                      | design       | simulation   | %error | design       | simulation   | %error | design        | simulation   | %error |
| Hydrogen             | 0            | 0            |        | 0            | 0            |        | 0.1557        | 0.156        | 0.00   |
| Carbon-Monoxide      | 0            | 0            |        | 0            | 0            |        | 0.0011        | 0.001        | 0.00   |
| Carbon-Dioxide       | 0            | 0            |        | 0            | 0            |        | 0             |              |        |
| Hydrogen-Sulfide     | 0            | 0            |        | 0            | 0            |        | 0             |              |        |
| Methane              | 0            | 0            |        | 0            | 0            |        | 0.2749        | 0.275        | 0.04   |
| Acetylene            | 0            | 0            |        | 0            | 0            |        | 0.0053        | 0.005        | 0.00   |
| Ethylene             | 0            | 0            |        | 0            | 0            |        | 0.2902        | 0.290        | 0.00   |
| Ethane               | 0            | 0            |        | 0            | 0            |        | 0.0507        | 0.051        | 0.00   |
| Propadiene           | 0            | 0            |        | 0            | 0            |        | 0.0048        | 0.005        | 0.00   |
| Propylene            | 0            | 0            |        | 0            | 0            |        | 0.1066        | 0.106        | 0.28   |
| Propane              | 0            | 0            |        | 0            | 0            |        | 0.0033        | 0.003        | 0.00   |
| 1,3-Butadiene        | 0            | 0            |        | 0            | 0            |        | 0.0206        | 0.021        | 0.00   |
| 1-Butene             | 0            | 0            |        | 0            | 0            |        | 0.0281        | 0.028        | 0.00   |
| n-Butane             | 0            | 0            |        | 0            | 0            |        | 0.0093        | 0.009        | 0.00   |
| 2-Methyl-Butane      | 0            | 0            |        | 0            | 0            |        | 0.0162        | 0.016        | 0.00   |
| 1-Hexyne             | 0            | 0            |        | 0            | 0            |        | 0.0047        | 0.005        | 0.00   |
| n-Heptane            | 0            | 0            |        | 0            | 0            |        | 0.0013        | 0.001        | 0.00   |
| n-Octane             | 0            | 0            |        | 0            | 0            |        | 0.0001        | 0.000        | 0.00   |
| Benzene              | 0            | 0            |        | 0            | 0            |        | 0.0137        | 0.014        | 0.00   |
| Toluene              | 0            | 0            |        | 0            | 0            |        | 0.0031        | 0.003        | 0.00   |
| P-Xylene             | 0            | 0            |        | 0            | 0            |        | 0.0001        | 0.000        | 0.00   |
| Ethylbenzene         | 0            | 0            |        | 0            | 0            |        | 0             |              |        |
| Styrene              | 0            | 0            |        | 0            | 0            |        | 0             |              |        |
| M-Methyl-Styrene     | 0            | 0            |        | 0            | 0            |        | 0             |              |        |
| n-Decane             | 0            | 0            |        | 0            | 0            |        | 0             |              |        |
| n-Undecane           | 0            | 0            |        | 0            | 0            |        | 0             |              |        |
| n-Dodecane           | 0            | 0            |        | 0            | 0            |        | 0             |              |        |
| n-Hexadecane         | 0            | 0            |        | 0            | 0            |        | 0             |              |        |
| Sodium-Hydroxide     | 0            | 0            |        | 0            | 0            |        | 0             | 0            |        |
| Sodium-Carbonate     | 0            | 0            |        | 0            | 0            |        | 0             | 0            |        |
| Sodium-Sulfide       | 0            | 0            |        | 0            | 0            |        | 0             | 0            |        |
| Water                | 1            | 1            | 0.00   | 1            | 1            | 0.00   | 0.0103        | 0.010        | 0.00   |
| Nitrogen             | 0            | 0            |        | 0            | 0            |        | 0.0002        | 0.000        | 0.00   |
| wash gasoline        |              |              |        |              |              |        |               |              |        |
|                      |              |              |        |              |              |        |               |              |        |
| <b>total</b>         | <b>1.000</b> | <b>1.000</b> |        | <b>1.000</b> | <b>1.000</b> |        | <b>1.0003</b> | <b>1.000</b> |        |
|                      |              |              |        |              |              |        |               |              |        |
| Mass flow (kg/h)     | 5800         | 5800         | 0.00   | 494          | 494          | 0.00   | 312644        | 312644.000   | 0.00   |
| Molar flow (kgmol/h) | 321.9        | 321.9        | 0.00   | 27.42        | 27.42        | 0.00   | 12101.9       | 12091.615    | 0.08   |
| Temperature (C)      | 46           | 46           | 0.00   | 46           | 46           | 0.00   | 46            | 46           | 0.00   |
| Pressure (kg/cm2_g)  | 16.04        | 16.04        | 0.00   | 9.34         | 9.34         | 0.00   | 8.85          | 8.85         | 0.00   |

# Simulation Report – ECC 860 KTA

## Working Stage 6

|                      | 3023          |               |        | 3062          |               |        | 3063          |              |        |
|----------------------|---------------|---------------|--------|---------------|---------------|--------|---------------|--------------|--------|
|                      | Design        | Simulation    | %error | Design        | Simulation    | %error | Design        | Simulation   | %error |
| Hydrogen             | 0.1795        | 0.1795        | 0.02   | 0.1795        | 0.1795        | 0.02   | 0.1795        | 0.1795       | 0.02   |
| CO                   | 0.0011        | 0.0011        | 0.02   | 0.0011        | 0.0011        | 0.02   | 0.0011        | 0.0011       | 0.02   |
| CO2                  | 0             | 0.0000        |        | 0             | 0.0000        |        | 0             | 0            |        |
| H2S                  | 0             | 0.0000        |        | 0             | 0.0000        |        | 0             | 0            |        |
| Methane              | 0.2994        | 0.2995        | 0.02   | 0.2994        | 0.2995        | 0.02   | 0.2994        | 0.2995       | 0.02   |
| Acetylene            | 0.0057        | 0.0057        | 0.02   | 0.0057        | 0.0057        | 0.02   | 0.0057        | 0.0057       | 0.02   |
| Ethylene             | 0.314         | 0.3141        | 0.02   | 0.314         | 0.3141        | 0.02   | 0.314         | 0.3141       | 0.02   |
| Ethane               | 0.0549        | 0.0549        | 0.02   | 0.0549        | 0.0549        | 0.02   | 0.0549        | 0.0549       | 0.02   |
| Propadiene           | 0.0042        | 0.0042        | 0.02   | 0.0042        | 0.0042        | 0.02   | 0.0042        | 0.0042       | 0.02   |
| Propene              | 0.1027        | 0.1027        | 0.02   | 0.1027        | 0.1027        | 0.02   | 0.1027        | 0.1027       | 0.02   |
| Propane              | 0.0031        | 0.0031        | 0.02   | 0.0031        | 0.0031        | 0.02   | 0.0031        | 0.0031       | 0.02   |
| 13-Butadiene         | 0.0112        | 0.0112        | 0.02   | 0.0112        | 0.0112        | 0.02   | 0.0112        | 0.0112       | 0.02   |
| 1-Butene             | 0.016         | 0.0160        | 0.02   | 0.016         | 0.0160        | 0.02   | 0.016         | 0.0160       | 0.02   |
| n-Butane             | 0.005         | 0.0050        | 0.02   | 0.005         | 0.0050        | 0.02   | 0.005         | 0.0050       | 0.02   |
| i-Pentane            | 0.0018        | 0.0018        | 0.02   | 0.0018        | 0.0018        | 0.02   | 0.0018        | 0.0018       | 0.02   |
| 1-Hexyne             | 0             | 0             |        | 0             | 0             |        | 0             | 0            |        |
| n-Heptane            | 0             | 0             |        | 0             | 0             |        | 0             | 0            |        |
| n-Octane             | 0             | 0             |        | 0             | 0             |        | 0             | 0            |        |
| Benzene              | 0.0002        | 0.0002        | 0.02   | 0.0002        | 0.0002        | 0.02   | 0.0002        | 0.0002       | 0.02   |
| Toluene              | 0             | 0             |        | 0             | 0             |        | 0             | 0            |        |
| p-Xylene             | 0             | 0             |        | 0             | 0             |        | 0             | 0            |        |
| E-Benzene            | 0             | 0             |        | 0             | 0             |        | 0             | 0            |        |
| Styrene              | 0             | 0             |        | 0             | 0             |        | 0             | 0            |        |
| n-Nonane             | 0             | 0             |        | 0             | 0             |        | 0             | 0            |        |
| n-Decane             | 0             | 0             |        | 0             | 0             |        | 0             | 0            |        |
| n-C11                | 0             | 0             |        | 0             | 0             |        | 0             | 0            |        |
| H2O                  | 0.0007        | 0.0007        | 0.02   | 0.0007        | 0.0007        | 0.02   | 0.0007        | 0.0007       | 0.02   |
| Nitrogen             | 0.0003        | 0.0003        | 0.02   | 0.0003        | 0.0003        | 0.02   | 0.0003        | 0.0003       | 0.02   |
|                      |               |               |        |               |               |        |               |              |        |
| <b>total</b>         | <b>0.9998</b> | <b>1.0000</b> |        | <b>0.9998</b> | <b>1.0000</b> |        | <b>0.9998</b> | <b>1.000</b> |        |
|                      |               |               |        |               |               |        |               |              |        |
| Mass flow (kg/h)     | 250208        | 250014.322    | 0.08   | 125254        | 125007.161    | 0.20   | 125254        | 125007.161   | 0.20   |
| Molar flow (kgmol/h) | 11184.8       | 11171.171     | 0.12   | 5592.4        | 5585.585      | 0.12   | 5592.4        | 5585.585     | 0.12   |
| Temperature (C)      | 15.9          | 19.682        | 23.79  | 15.9          | 19.682        | 23.79  | 15.9          | 19.682       | 23.79  |
| Pressure (kg/cm2_g)  | 36.94         | 36.94         | 0.00   | 36.94         | 36.94         | 0.00   | 36.94         | 36.94        | 0.00   |

# Simulation Report – ECC 860 KTA

## Working Stage 6

|                      | 3024          |              |        | 3067          |              |        | 4101          |              |        |
|----------------------|---------------|--------------|--------|---------------|--------------|--------|---------------|--------------|--------|
|                      | Design        | Simulation   | %error | Design        | Simulation   | %error | Design        | Simulation   | %error |
| Hydrogen             | 0.1797        | 0.1797       | 0.02   | 0.1797        | 0.1797       | 0.02   | 0.1797        | 0.1797       | 0.02   |
| CO                   | 0.0011        | 0.0011       | 0.09   | 0.0011        | 0.0011       | 0.09   | 0.0011        | 0.0011       | 0.09   |
| CO2                  | 0             | 0.0000       |        | 0             | 0.0000       |        | 0             | 0.0000       |        |
| H2S                  | 0             | 0.0000       |        | 0             | 0.0000       |        | 0             | 0.0000       |        |
| Methane              | 0.2996        | 0.2997       | 0.02   | 0.2996        | 0.2997       | 0.02   | 0.2996        | 0.2997       | 0.02   |
| Acetylene            | 0.0058        | 0.0057       | 1.64   | 0.0058        | 0.0057       | 1.64   | 0.0058        | 0.0057       | 1.64   |
| Ethylene             | 0.3142        | 0.3143       | 0.03   | 0.3142        | 0.3143       | 0.03   | 0.3142        | 0.3143       | 0.03   |
| Ethane               | 0.0549        | 0.0549       | 0.09   | 0.0549        | 0.0549       | 0.09   | 0.0549        | 0.0549       | 0.09   |
| Propadiene           | 0.0042        | 0.0042       | 0.09   | 0.0042        | 0.0042       | 0.09   | 0.0042        | 0.0042       | 0.09   |
| Propene              | 0.1027        | 0.1028       | 0.09   | 0.1027        | 0.1028       | 0.09   | 0.1027        | 0.1028       | 0.09   |
| Propane              | 0.0031        | 0.0031       | 0.09   | 0.0031        | 0.0031       | 0.09   | 0.0031        | 0.0031       | 0.09   |
| 13-Butadiene         | 0.0112        | 0.0112       | 0.09   | 0.0112        | 0.0112       | 0.09   | 0.0112        | 0.0112       | 0.09   |
| 1-Butene             | 0.016         | 0.0160       | 0.09   | 0.016         | 0.0160       | 0.09   | 0.016         | 0.0160       | 0.09   |
| n-Butane             | 0.0051        | 0.0050       | 1.87   | 0.0051        | 0.0050       | 1.87   | 0.0051        | 0.0050       | 1.87   |
| i-Pentane            | 0.0018        | 0.0018       | 0.09   | 0.0018        | 0.0018       | 0.09   | 0.0018        | 0.0018       | 0.09   |
| 1-Hexyne             | 0             | 0.0000       |        | 0             | 0            |        | 0             | 0            |        |
| n-Heptane            | 0             | 0.0000       |        | 0             | 0            |        | 0             | 0            |        |
| n-Octane             | 0             | 0.0000       |        | 0             | 0            |        | 0             | 0            |        |
| Benzene              | 0.0002        | 0.0002       | 0.09   | 0.0002        | 0.0002       | 0.09   | 0.0002        | 0.0002       | 0.09   |
| Toluene              | 0             | 0.0000       |        | 0             | 0            |        | 0             | 0            |        |
| p-Xylene             | 0             | 0.0000       |        | 0             | 0            |        | 0             | 0            |        |
| E-Benzene            | 0             | 0.0000       |        | 0             | 0            |        | 0             | 0            |        |
| Styrene              | 0             | 0.0000       |        | 0             | 0            |        | 0             | 0            |        |
| n-Nonane             | 0             | 0.0000       |        | 0             | 0            |        | 0             | 0            |        |
| n-Decane             | 0             | 0.0000       |        | 0             | 0            |        | 0             | 0            |        |
| n-C11                | 0             | 0.0000       |        | 0             | 0            |        | 0             | 0            |        |
| H2O                  | 0             | 0.0000       |        | 0             | 0            |        | 0             | 0            |        |
| Nitrogen             | 0.0003        | 0.0003       | 0.09   | 0.0003        | 0.0003       | 0.09   | 0.0003        | 0.0003       | 0.09   |
|                      |               |              |        |               |              |        |               |              |        |
| <b>total</b>         | <b>0.9999</b> | <b>1.000</b> |        | <b>0.9999</b> | <b>1.000</b> |        | <b>0.9999</b> | <b>1.000</b> |        |
|                      |               |              |        |               |              |        |               |              |        |
| Mass flow (kg/h)     | 125186        | 124958.289   | 0.18   | 185000        | 184773.289   | 0.12   | 185000        | 184773.289   | 0.12   |
| Molar flow (kgmol/h) | 5588.6        | 5582.872     | 0.10   | 8258.8        | 8255.280     | 0.04   | 8258.8        | 8255.280     | 0.04   |
| Temperature (C)      | 15.9          | 15.9         | 0.00   | 15.9          | 15.9         | 0.00   | -5.7          | -5.7         | 0.00   |
| Pressure (kg/cm2_g)  | 36.68         | 36.68        | 0.00   | 36.68         | 36.68        | 0.00   | 36.4          | 36.4         | 0.00   |

# Simulation Report – ECC 860 KTA

## Working Stage 6

|                      | 3064          |              |        | 4701          |              |        |
|----------------------|---------------|--------------|--------|---------------|--------------|--------|
|                      | Design        | Simulation   | %error | Design        | Simulation   | %error |
| Hydrogen             | 0.1797        | 0.1797       | 0.02   | 0.1797        | 0.1797       | 0.02   |
| CO                   | 0.0011        | 0.0011       | 0.09   | 0.0011        | 0.0011       | 0.09   |
| CO2                  | 0             | 0            |        | 0             | 0            |        |
| H2S                  | 0             | 0            |        | 0             | 0            |        |
| Methane              | 0.2996        | 0.2997       | 0.02   | 0.2996        | 0.2997       | 0.02   |
| Acetylene            | 0.0058        | 0.0057       | 1.64   | 0.0058        | 0.0057       | 1.64   |
| Ethylene             | 0.3142        | 0.3143       | 0.03   | 0.3142        | 0.3143       | 0.03   |
| Ethane               | 0.0549        | 0.0549       | 0.09   | 0.0549        | 0.0549       | 0.09   |
| Propadiene           | 0.0042        | 0.0042       | 0.09   | 0.0042        | 0.0042       | 0.09   |
| Propene              | 0.1027        | 0.1028       | 0.09   | 0.1027        | 0.1028       | 0.09   |
| Propane              | 0.0031        | 0.0031       | 0.09   | 0.0031        | 0.0031       | 0.09   |
| 13-Butadiene         | 0.0112        | 0.0112       | 0.09   | 0.0112        | 0.0112       | 0.09   |
| 1-Butene             | 0.016         | 0.0160       | 0.09   | 0.016         | 0.0160       | 0.09   |
| n-Butane             | 0.0051        | 0.0050       | 1.87   | 0.0051        | 0.0050       | 1.87   |
| i-Pentane            | 0.0018        | 0.0018       | 0.09   | 0.0018        | 0.0018       | 0.09   |
| 1-Hexyne             | 0             | 0            |        | 0             | 0            |        |
| n-Heptane            | 0             | 0            |        | 0             | 0            |        |
| n-Octane             | 0             | 0            |        | 0             | 0            |        |
| Benzene              | 0.0002        | 0.0002       | 0.09   | 0.0002        | 0.0002       | 0.09   |
| Toluene              | 0             | 0            |        | 0             | 0            |        |
| p-Xylene             | 0             | 0            |        | 0             | 0            |        |
| E-Benzene            | 0             | 0            |        | 0             | 0            |        |
| Styrene              | 0             | 0            |        | 0             | 0            |        |
| n-Nonane             | 0             | 0            |        | 0             | 0            |        |
| n-Decane             | 0             | 0            |        | 0             | 0            |        |
| n-C11                | 0             | 0            |        | 0             | 0            |        |
| H2O                  | 0             | 0            |        | 0             | 0            |        |
| Nitrogen             | 0.0003        | 0.0003       | 0.09   | 0.0003        | 0.0003       | 0.09   |
|                      |               |              |        |               |              |        |
| <b>total</b>         | <b>0.9999</b> | <b>1.000</b> |        | <b>0.9999</b> | <b>1.000</b> |        |
|                      |               |              |        |               |              |        |
| Mass flow (kg/h)     | 125186        | 124958.289   | 0.18   | 65371         | 65143.289    | 0.35   |
| Molar flow (kgmol/h) | 5588.6        | 5582.872     | 0.10   | 2918.3        | 2910.465     | 0.27   |
| Temperature (C)      | 15.9          | 15.9         | 0.00   | -5.7          | -5.7         | 0.00   |
| Pressure (kg/cm2_g)  | 36.68         | 36.68        |        | 36.12         | 36.12        | 0.00   |



# Simulation Report – ECC 860 KTA

## Working Stage 6

|                      | 3306   |            |        | 2121   |            |        | 3908   |            |        |
|----------------------|--------|------------|--------|--------|------------|--------|--------|------------|--------|
|                      | design | Simulation | %error | design | Simulation | %error | design | Simulation | %error |
| Hydrogen             | 0      | 0.0000     |        | 0      | 0.0000     |        | 0      | 0.0000     |        |
| Carbon-Monoxide      | 0      | 0.0000     |        | 0      | 0.0000     |        | 0      | 0.0000     |        |
| Carbon-Dioxide       | 0      | 0.0000     |        | 0      | 0.0000     |        | 0      | 0.0000     |        |
| Hydrogen-Sulfide     | 0      | 0.0000     |        | 0      | 0.0000     |        | 0      | 0.0000     |        |
| Methane              | 0      | 0.0000     |        | 0.0006 | 0.0006     | 0.00   | 0.0006 | 0.0006     | 0.00   |
| Acetylene            | 0      | 0.0000     |        | 0.0001 | 0.0001     | 0.00   | 0.0001 | 0.0001     | 0.00   |
| Ethylene             | 0      | 0.0000     |        | 0.0018 | 0.0018     | 0.00   | 0.0018 | 0.0018     | 0.00   |
| Ethane               | 0      | 0.0000     |        | 0.0005 | 0.0005     | 0.00   | 0.0005 | 0.0005     | 0.00   |
| Propadiene           | 0      | 0.0000     |        | 0.0004 | 0.0004     | 0.00   | 0.0004 | 0.0004     | 0.00   |
| Propylene            | 0      | 0.0000     |        | 0.003  | 0.0030     | 0.00   | 0.003  | 0.0030     | 0.00   |
| Propane              | 0      | 0.0000     |        | 0.0001 | 0.0001     | 0.00   | 0.0001 | 0.0001     | 0.00   |
| 1,3-Butadiene        | 0      | 0.0000     |        | 0.0026 | 0.0026     | 0.00   | 0.0026 | 0.0026     | 0.00   |
| 1-Butene             | 0      | 0.0000     |        | 0.0026 | 0.0026     | 0.00   | 0.0026 | 0.0026     | 0.00   |
| n-Butane             | 0      | 0.0000     |        | 0.0008 | 0.0008     | 0.00   | 0.0008 | 0.0008     | 0.00   |
| 2-Methyl-Butane      | 0      | 0.0000     |        | 0.0027 | 0.0027     | 0.00   | 0.0027 | 0.0027     | 0.00   |
| 1-Hexyne             | 0      | 0.0000     |        | 0.0021 | 0.0021     | 0.00   | 0.0021 | 0.0021     | 0.00   |
| n-Heptane            | 0      | 0.0000     |        | 0.0022 | 0.0022     | 0.00   | 0.0022 | 0.0022     | 0.00   |
| n-Octane             | 0      | 0.0000     |        | 0.0026 | 0.0026     | 0.00   | 0.0026 | 0.0026     | 0.00   |
| Benzene              | 0      | 0.0000     |        | 0.0206 | 0.0206     | 0.00   | 0.0206 | 0.0206     | 0.00   |
| Toluene              | 0      | 0.0000     |        | 0.045  | 0.0450     | 0.00   | 0.045  | 0.0450     | 0.00   |
| P-Xylene             | 0      | 0.0000     |        | 0.0355 | 0.0355     | 0.00   | 0.0355 | 0.0355     | 0.00   |
| Ethylbenzene         | 0      | 0.0000     |        | 0      | 0.0000     |        | 0      | 0.0000     |        |
| Styrene              | 0      | 0.0000     |        | 0.0375 | 0.0375     | 0.00   | 0.0375 | 0.0375     | 0.00   |
| M-Methyl-Styrene     | 0      | 0.0000     |        | 0.7904 | 0.6088     |        | 0.7904 | 0.6088     |        |
| n-Decane             | 0      | 0.0000     |        |        | 0.1816     |        |        | 0.1816     |        |
| n-Undecane           | 0      | 0.0000     |        |        | 0.0000     |        |        | 0.0000     |        |
| n-Dodecane           | 0      | 0.0000     |        | 0.0343 | 0.0343     | 0.00   | 0.0343 | 0.0343     | 0.00   |
| n-Hexadecane         | 0      | 0.0000     |        | 0      | 0.0000     |        | 0      | 0.0000     |        |
| Sodium-Hydroxide     | 0.0072 | 0.0000     | 100.00 | 0      | 0.0000     |        | 0      | 0.0000     |        |
| Sodium-Carbonate     | 0.0182 | 0.0079     | 56.59  | 0      | 0.0000     |        | 0      | 0.0000     |        |
| Sodium-Sulfide       | 0.0023 | 0.0000     | 100.00 | 0      | 0.0000     |        | 0      | 0.0000     |        |
| Water                | 0.9724 | 0.9921     | 2.03   | 0.0145 | 0.0145     | 0.00   | 0.0145 | 0.0145     | 0.00   |
| Nitrogen             | 0      | 0.0000     |        | 0      | 0.0000     |        | 0      | 0.0000     |        |
| wash gasoline        |        |            |        |        |            |        |        |            |        |
|                      |        |            |        |        |            |        |        |            |        |
| total                | 1.000  | 1.000      |        | 0.9999 | 1.000      |        | 0.9999 | 1.000      |        |
|                      |        |            |        |        |            |        |        | 2373       |        |
| Mass flow (kg/h)     | 4747   | 4747.258   | 0.01   | 2373   | 2373       | 0      | 2373   | 19.98      | 0      |
| Molar flow (kgmol/h) | 238.5  | 253.761    | 6.40   | 19.8   | 19.98      | 0.91   | 19.5   | 46         | 2.46   |
| Temperature (C)      | 46     | 46         | 0.00   | 85.4   | 85.4       | 0      | 46     | 2.9        | 0      |
| Pressure (kg/cm2_g)  | 9.53   | 9.110      | 4.41   | 6.7    | 6.7        | 0      | 2.9    | 1.000      | 0      |

# Simulation Report – ECC 860 KTA

## Working Stage 6

|                      | 3901         |              |        | 3902         |              |        | 3093         |              |        |
|----------------------|--------------|--------------|--------|--------------|--------------|--------|--------------|--------------|--------|
|                      | design       | Simulation   | %error | design       | simulation   | %error | design       | simulation   | %error |
| Hydrogen             | 0            | 0.0000       |        | 0            | 0.0000       |        | 0            | 0.0000       |        |
| Carbon-Monoxide      | 0            | 0.0000       |        | 0            | 0.0000       |        | 0            | 0.0000       |        |
| Carbon-Dioxide       | 0            | 0.0000       |        | 0            | 0.0000       |        | 0            | 0.0000       |        |
| Hydrogen-Sulfide     | 0            | 0.0000       |        | 0            | 0.0000       |        | 0            | 0.0000       |        |
| Methane              | 0            | 0.0000       |        | 0            | 0.0005       |        | 0            | 0.0000       |        |
| Acetylene            | 0            | 0.0000       |        | 0            | 0.0001       |        | 0            | 0.0000       |        |
| Ethylene             | 0            | 0.0001       |        | 0            | 0.0014       |        | 0            | 0.0000       |        |
| Ethane               | 0            | 0.0000       |        | 0            | 0.0004       |        | 0            | 0.0000       |        |
| Propadiene           | 0            | 0.0000       |        | 0            | 0.0003       |        | 0            | 0.0000       |        |
| Propylene            | 0            | 0.0002       |        | 0            | 0.0023       |        | 0            | 0.0000       |        |
| Propane              | 0            | 0.0000       |        | 0            | 0.0001       |        | 0            | 0.0000       |        |
| 1,3-Butadiene        | 0            | 0.0002       |        | 0            | 0.0020       |        | 0            | 0.0000       |        |
| 1-Butene             | 0            | 0.0002       |        | 0            | 0.0020       |        | 0            | 0.0000       |        |
| n-Butane             | 0            | 0.0001       |        | 0            | 0.0006       |        | 0            | 0.0000       |        |
| 2-Methyl-Butane      | 0            | 0.0002       |        | 0            | 0.0021       |        | 0            | 0.0000       |        |
| 1-Hexyne             | 0            | 0.0002       |        | 0            | 0.0016       |        | 0            | 0.0000       |        |
| n-Heptane            | 0            | 0.0002       |        | 0            | 0.0017       |        | 0            | 0.0000       |        |
| n-Octane             | 0            | 0.0002       |        | 0            | 0.0020       |        | 0            | 0.0000       |        |
| Benzene              | 0            | 0.0016       |        | 0            | 0.0161       |        | 0            | 0.0000       |        |
| Toluene              | 0            | 0.0035       |        | 0            | 0.0351       |        | 0            | 0.0000       |        |
| P-Xylene             | 0            | 0.0027       |        | 0            | 0.0277       |        | 0            | 0.0000       |        |
| Ethylbenzene         | 0            | 0.0000       |        | 0            | 0.0000       |        | 0            | 0.0000       |        |
| Styrene              | 0            | 0.0029       |        | 0            | 0.0292       |        | 0            | 0.0000       |        |
| M-Methyl-Styrene     | 0            | 0.0471       |        | 0            | 0.4748       |        | 0            | 0.0000       |        |
| n-Decane             | 0            | 0.0140       |        | 0            | 0.1416       |        | 0            | 0.0000       |        |
| n-Undecane           | 0            | 0.0000       |        | 0            | 0.0000       |        | 0            | 0.0000       |        |
| n-Dodecane           | 0            | 0.0027       |        | 0            | 0.0268       |        | 0            | 0.0000       |        |
| n-Hexadecane         | 0            | 0.0000       |        | 0            | 0.0000       |        | 0            | 0.0000       |        |
| Sodium-Hydroxide     | 0.0067       | 0.0066       | 1.49   | 0.0017       | 0.0000       | 100.00 | 0.0072       | 0.0000       | 100.00 |
| Sodium-Carbonate     | 0.0168       | 0.0168       | 0.00   | 0.0042       | 0.0042       | 0.00   | 0.0182       | 0.0076       | 58.24  |
| Sodium-Sulfide       | 0.0021       | 0.0021       | 0.00   | 0.0005       | 0.0000       | 100.00 | 0.0023       | 0.0000       | 100.00 |
| Water                | 0.8987       | 0.8982       | 0.06   | 0.2273       | 0.2273       | 0.00   | 0.9724       | 0.9924       | 2.06   |
| Nitrogen             | 0            | 0.0000       |        | 0            | 0.0000       |        | 0            | 0.0000       |        |
| wash gasoline        | 0.0757       |              |        | 0.7663       |              |        |              |              |        |
|                      |              |              |        |              |              |        |              |              |        |
| <b>total</b>         | <b>1.000</b> | <b>1.000</b> |        | <b>1.000</b> | <b>1.000</b> |        | <b>1.000</b> | <b>1.000</b> |        |
|                      |              |              |        |              |              |        |              |              |        |
| Mass flow (kg/h)     | 7120         | 7120         | 0.00   | 2492         | 2484         | 0.32   | 4628         | 4636         | 0.17   |
| Molar flow (kgmol/h) | 258          | 273.7        | 6.09   | 25.5         | 25.62        | 0.47   | 232.5        | 248.1        | 6.71   |
| Temperature (C)      | 46           | 43.51        | 5.41   | 46           | 46           | 0.00   | 46           | 46           | 0.00   |
| Pressure (kg/cm2_g)  | 2.1          | 2.1          | 0.00   | 2.1          | 2.1          | 0.00   | 2.1          | 2.1          | 0.00   |
|                      |              |              |        |              |              |        |              |              |        |

# Simulation Report – ECC 860 KTA

## Working Stage 6

|                      | 2505         |              |        | 3904          |              |        | 3905         |              |          |
|----------------------|--------------|--------------|--------|---------------|--------------|--------|--------------|--------------|----------|
|                      | design       | simulation   | %error | design        | simulation   | %error | design       | simulation   | %error   |
| Hydrogen             | 0            | 0.0000       |        | 0             | 0.0000       |        | 0            | 0.0000       |          |
| Carbon-Monoxide      | 0            | 0.0000       |        | 0             | 0.0000       |        | 0            | 0.0000       |          |
| Carbon-Dioxide       | 0            | 0.0000       |        | 0             | 0.0000       |        | 0            | 0.0000       |          |
| Hydrogen-Sulfide     | 0            | 0.0000       |        | 0             | 0.0000       |        | 0            | 0.0000       |          |
| Methane              | 0            | 0.0000       |        | 0             | 0.0001       |        | 0            | 0.0000       |          |
| Acetylene            | 0            | 0.0000       |        | 0             | 0.0000       |        | 0            | 0.0000       |          |
| Ethylene             | 0            | 0.0000       |        | 0             | 0.0004       |        | 0            | 0.0000       |          |
| Ethane               | 0            | 0.0000       |        | 0             | 0.0001       |        | 0            | 0.0000       |          |
| Propadiene           | 0            | 0.0000       |        | 0             | 0.0001       |        | 0            | 0.0000       |          |
| Propylene            | 0            | 0.0000       |        | 0             | 0.0006       |        | 0            | 0.0000       |          |
| Propane              | 0            | 0.0000       |        | 0             | 0.0000       |        | 0            | 0.0000       |          |
| 1,3-Butadiene        | 0            | 0.0000       |        | 0             | 0.0005       |        | 0            | 0.0000       |          |
| 1-Butene             | 0            | 0.0000       |        | 0             | 0.0005       |        | 0            | 0.0000       |          |
| n-Butane             | 0            | 0.0000       |        | 0             | 0.0002       |        | 0            | 0.0000       |          |
| 2-Methyl-Butane      | 0            | 0.0000       |        | 0             | 0.0006       |        | 0            | 0.0000       |          |
| 1-Hexyne             | 0            | 0.0000       |        | 0             | 0.0004       |        | 0            | 0.0000       |          |
| n-Heptane            | 0            | 0.0000       |        | 0             | 0.0005       |        | 0            | 0.0000       |          |
| n-Octane             | 0            | 0.0000       |        | 0             | 0.0005       |        | 0            | 0.0000       |          |
| Benzene              | 0            | 0.0000       |        | 0             | 0.0043       |        | 0            | 0.0000       |          |
| Toluene              | 0            | 0.0000       |        | 0             | 0.0095       |        | 0            | 0.0000       |          |
| P-Xylene             | 0            | 0.0000       |        | 0             | 0.0075       |        | 0            | 0.0000       |          |
| Ethylbenzene         | 0            | 0.0000       |        | 0             | 0.0000       |        | 0            | 0.0000       |          |
| Styrene              | 0            | 0.0000       |        | 0             | 0.0079       |        | 0            | 0.0000       |          |
| M-Methyl-Styrene     | 0            | 0.0000       |        | 0             | 0.1283       |        | 0            | 0.0000       |          |
| n-Decane             | 0            | 0.0000       |        | 0             | 0.0383       |        | 0            | 0.0000       |          |
| n-Undecane           | 0            | 0.0000       |        | 0             | 0.0000       |        | 0            | 0.0000       |          |
| n-Dodecane           | 0            | 0.0000       |        | 0             | 0.0072       |        | 0            | 0.0000       |          |
| n-Hexadecane         | 0            | 0.0000       |        | 0             | 0.0000       |        | 0            | 0.0000       |          |
| Sodium-Hydroxide     | 0            | 0.0000       |        | 0.0005        | 0.0000       | 100.00 | 0.0006       | 0.0000       | 100      |
| Sodium-Carbonate     | 0            | 0.0000       |        | 0.0011        | 0.0011       | 0.00   | 0.0014       | 0.0014       | 0.00     |
| Sodium-Sulfide       | 0            | 0.0000       |        | 0.0001        | 0.0000       | 100.00 | 0.0002       | 0.0000       | 100      |
| Water                | 1            | 1.0000       | 0.00   | 0.7918        | 0.7911       | 0.09   | 0.9978       | 0.9986       | 0.080176 |
| Nitrogen             | 0            | 0.0000       |        | 0             | 0.0000       |        | 0            | 0.0000       |          |
| wash gasoline        |              |              |        | 0.2064        |              |        |              |              |          |
|                      |              |              |        |               |              |        |              |              |          |
| <b>total</b>         | <b>1.000</b> | <b>1.000</b> |        | <b>0.9999</b> | <b>1.000</b> |        | <b>1.000</b> | <b>1.000</b> |          |
|                      |              |              |        |               |              |        |              |              |          |
| Mass flow (kg/h)     | 1246         | 1246         | 0.00   | 3738          | 3730         | 0.21   | 1365         | 1362         | 0.22     |
| Molar flow (kgmol/h) | 69.16        | 69.16        | 0.01   | 94.7          | 94.78        | 0.08   | 75.1         | 75.09        | 0.01     |
| Temperature (C)      | 121.3        | 121.3        | 0.00   | 119.9         | 119.9        | 0.00   | 119.9        | 119.9        | 0.00     |
| Pressure (kg/cm2_g)  | 10.5         | 10.5         | 0.00   | 2.85          | 2.85         | 0.00   | 2.1          | 2.1          | 0.00     |

# Simulation Report – ECC 860 KTA

## Working Stage 6

|                      | 3906         |              |        | 3907         |              |        |
|----------------------|--------------|--------------|--------|--------------|--------------|--------|
|                      | design       | simulation   | %error | design       | simulation   | %error |
| Hydrogen             | 0            | 0.0000       |        |              | 0.0000       |        |
| Carbon-Monoxide      | 0            | 0.0000       |        |              | 0.0000       |        |
| Carbon-Dioxide       | 0            | 0.0000       |        |              | 0.0000       |        |
| Hydrogen-Sulfide     | 0            | 0.0000       |        |              | 0.0000       |        |
| Methane              | 0            | 0.0000       |        |              | 0.0006       |        |
| Acetylene            | 0            | 0.0000       |        |              | 0.0001       |        |
| Ethylene             | 0            | 0.0000       |        |              | 0.0018       |        |
| Ethane               | 0            | 0.0000       |        |              | 0.0005       |        |
| Propadiene           | 0            | 0.0000       |        |              | 0.0004       |        |
| Propylene            | 0            | 0.0000       |        |              | 0.0030       |        |
| Propane              | 0            | 0.0000       |        |              | 0.0001       |        |
| 1,3-Butadiene        | 0            | 0.0000       |        |              | 0.0026       |        |
| 1-Butene             | 0            | 0.0000       |        |              | 0.0026       |        |
| n-Butane             | 0            | 0.0000       |        |              | 0.0008       |        |
| 2-Methyl-Butane      | 0            | 0.0000       |        |              | 0.0027       |        |
| 1-Hexyne             | 0            | 0.0000       |        |              | 0.0021       |        |
| n-Heptane            | 0            | 0.0000       |        |              | 0.0022       |        |
| n-Octane             | 0            | 0.0000       |        |              | 0.0026       |        |
| Benzene              | 0            | 0.0000       |        |              | 0.0209       |        |
| Toluene              | 0            | 0.0000       |        |              | 0.0457       |        |
| P-Xylene             | 0            | 0.0000       |        |              | 0.0360       |        |
| Ethylbenzene         | 0            | 0.0000       |        |              | 0.0000       |        |
| Styrene              | 0            | 0.0000       |        |              | 0.0381       |        |
| M-Methyl-Styrene     | 0            | 0.0000       |        |              | 0.6178       |        |
| n-Decane             | 0            | 0.0000       |        |              | 0.1843       |        |
| n-Undecane           | 0            | 0.0000       |        |              | 0.0000       |        |
| n-Dodecane           | 0            | 0.0000       |        |              | 0.0348       |        |
| n-Hexadecane         | 0            | 0.0000       |        |              | 0.0000       |        |
| Sodium-Hydroxide     | 0.0056       | 0.0000       | 100    |              | 0.0000       |        |
| Sodium-Carbonate     | 0.0141       | 0.0062       | 56     |              | 0.0000       |        |
| Sodium-Sulfide       | 0.0018       | 0.0000       | 100    |              | 0.0000       |        |
| Water                | 0.9786       | 0.9938       | 2      |              | 0.0000       |        |
| Nitrogen             |              | 0.0000       |        |              | 0.0000       |        |
| wash gasoline        |              |              |        |              |              |        |
|                      |              |              |        |              |              |        |
| <b>total</b>         | <b>1.000</b> | <b>1.000</b> |        | <b>1.000</b> | <b>1.000</b> |        |
|                      |              |              |        |              |              |        |
| Mass flow (kg/h)     | 5993         | 5998.478     | 0.09   | 2373         | 2368         | 0.21   |
| Molar flow (kgmol/h) | 307.6        | 323.214      | 5.08   | 19.5         | 19.69        | 0.97   |
| Temperature (C)      | 62.8         | 62.8         | 0.00   | 119.9        | 119.953      | 0.04   |
| Pressure (kg/cm2_g)  | 1.85         | 1.85         | 0.00   | 2.79         | 2.79         | 0.00   |

# Simulation Report – ECC 860 KTA

## Working Stage 6

|                               | 1123       |        |         | 1243       |        |         | 3012       |         |         |
|-------------------------------|------------|--------|---------|------------|--------|---------|------------|---------|---------|
|                               | Simulation | Design | %-Error | Simulation | Design | %-Error | Simulation | Design  | %-Error |
| Comp Mole Frac (Hydrogen)     | 0.7613     | 0.7612 | 0.01    | 0.8758     | 0.8757 | 0.01    | 0.1557     | 0.1557  | 0.00    |
| Comp Mole Frac (CO)           | 0          | 0      | 0.00    | 0          | 0      | 0.00    | 0.0011     | 0.0011  | 0.00    |
| Comp Mole Frac (CO2)          | 0          | 0      | 0.00    | 0          | 0      | 0.00    | 0          | 0       | 0.00    |
| Comp Mole Frac (H2S)          | 0          | 0      | 0.00    | 0          | 0      | 0.00    | 0          | 0       | 0.00    |
| Comp Mole Frac (Methane)      | 0.1569     | 0.1569 | 0.00    | 0.0932     | 0.0932 | 0.00    | 0.2748     | 0.2748  | 0.00    |
| Comp Mole Frac (Acetylene)    | 0          | 0      | 0.00    | 0          | 0      | 0.00    | 0.0053     | 0.0053  | 0.00    |
| Comp Mole Frac (Ethylene)     | 0          | 0      | 0.00    | 0          | 0      | 0.00    | 0.2902     | 0.2902  | 0.00    |
| Comp Mole Frac (Ethane)       | 0          | 0      | 0.00    | 0          | 0      | 0.00    | 0.0507     | 0.0507  | 0.00    |
| Comp Mole Frac (Propadiene)   | 0          | 0      | 0.00    | 0          | 0      | 0.00    | 0.0048     | 0.0048  | 0.00    |
| Comp Mole Frac (Propene)      | 0.0004     | 0.0004 | 0.00    | 0          | 0      | 0.00    | 0.1063     | 0.1063  | 0.00    |
| Comp Mole Frac (Propane)      | 0.0013     | 0.0013 | 0.00    | 0          | 0      | 0.00    | 0.0033     | 0.0033  | 0.00    |
| Comp Mole Frac (13-Butadiene) | 0          | 0      | 0.00    | 0.0001     | 0.0001 | 0.00    | 0.0206     | 0.0206  | 0.00    |
| Comp Mole Frac (1-Butene)     | 0.0019     | 0.0019 | 0.00    | 0.0033     | 0.0033 | 0.00    | 0.0281     | 0.0281  | 0.00    |
| Comp Mole Frac (n-Butane)     | 0.0697     | 0.0697 | 0.00    | 0.0004     | 0.0004 | 0.00    | 0.0093     | 0.0093  | 0.00    |
| Comp Mole Frac (i-Pentane)    | 0.0027     | 0.0027 | 0.00    | 0.0161     | 0.0161 | 0.00    | 0.0162     | 0.0162  | 0.00    |
| Comp Mole Frac (1-Hexyne)     | 0          | 0      | 0.00    | 0.0016     | 0.0016 | 0.00    | 0.0047     | 0.0047  | 0.00    |
| Comp Mole Frac (n-Heptane)    | 0          | 0      | 0.00    | 0.0002     | 0.0002 | 0.00    | 0.0013     | 0.0013  | 0.00    |
| Comp Mole Frac (n-Octane)     | 0          | 0      | 0.00    | 0          | 0      | 0.00    | 0.0001     | 0.0001  | 0.00    |
| Comp Mole Frac (Benzene)      | 0          | 0      | 0.00    | 0.0039     | 0.0039 | 0.00    | 0.0137     | 0.0137  | 0.00    |
| Comp Mole Frac (Toluene)      | 0          | 0      | 0.00    | 0.0009     | 0.0009 | 0.00    | 0.0031     | 0.0031  | 0.00    |
| Comp Mole Frac (p-Xylene)     | 0          | 0      | 0.00    | 0.0001     | 0.0001 | 0.00    | 0.0001     | 0.0001  | 0.00    |
| Comp Mole Frac (E-Benzene)    | 0          | 0      | 0.00    | 0          | 0      | 0.00    | 0          | 0       | 0.00    |
| Comp Mole Frac (n-Nonane)     | 0          | 0      | 0.00    | 0          | 0      | 0.00    | 0          | 0       | 0.00    |
| Comp Mole Frac (Styrene)      | 0          | 0      | 0.00    | 0          | 0      | 0.00    | 0          | 0       | 0.00    |
| Comp Mole Frac (n-C11)        | 0          | 0      | 0.00    | 0          | 0      | 0.00    | 0          | 0       | 0.00    |
| Comp Mole Frac (n-Decane)     | 0          | 0      | 0.00    | 0          | 0      | 0.00    | 0          | 0       | 0.00    |
| Comp Mole Frac (H2O)          | 0.0005     | 0.0005 | 0.00    | 0.0001     | 0.0001 | 0.00    | 0.0103     | 0.0103  | 0.00    |
| Comp Mole Frac (Nitrogen)     | 0.0053     | 0.0053 | 0.00    | 0.0043     | 0.0043 | 0.00    | 0.0002     | 0.0002  | 0.00    |
|                               |            | 0.9999 |         |            | 0.9999 |         |            | 0.9999  |         |
|                               |            |        |         |            |        |         |            |         |         |
|                               | 1123       |        |         | 1243       |        |         | 3012       |         |         |
| Mass Flow (kg/h)              | 998        | 998    | 0.00    | 250        | 250    | 0.00    | 312644     | 312644  | 0.00    |
| Molar Flow (kgmole/h)         | 115.55     | 110.3  | 4.76    | 47.09      | 47.3   | 0.44    | 12091.61   | 12101.9 | 0.09    |
| Temperature (C)               | 9.3        | 9.3    | 0.00    | 44.1       | 44.1   | 0.00    | 46         | 46      | 0.00    |
| Pressure (kg/cm2_g)           | 18.39      | 18.39  | 0.00    | 18.53      | 18.53  | 0.00    | 8.85       | 8.85    | 0.00    |

# Simulation Report – ECC 860 KTA

## Working Stage 6

|                               | 3013       |         |         | 3014        |         |         | 3015        |         |         |
|-------------------------------|------------|---------|---------|-------------|---------|---------|-------------|---------|---------|
|                               | Simulation | Design  | %-Error | Simulation  | Design  | %-Error | Simulation  | Design  | %-Error |
| Comp Mole Frac (Hydrogen)     | 0.152      | 0.1518  | 0.13    | 0.1507      | 0.1506  | 0.07    | 0.1507      | 0.1506  | 0.07    |
| Comp Mole Frac (CO)           | 0.0011     | 0.001   | 10.00   | 0.0011      | 0.0010  | 10.00   | 0.0011      | 0.001   | 10.00   |
| Comp Mole Frac (CO2)          | 0          | 0       | 0.00    | 0           | 0       | 0.00    | 0           | 0       | 0.00    |
| Comp Mole Frac (H2S)          | 0          | 0       | 0.00    | 0           | 0       | 0.00    | 0           | 0       | 0.00    |
| Comp Mole Frac (Methane)      | 0.2706     | 0.2705  | 0.04    | 0.2684      | 0.2683  | 0.04    | 0.2684      | 0.2683  | 0.04    |
| Comp Mole Frac (Acetylene)    | 0.0052     | 0.0054  | 3.70    | 0.0051      | 0.0053  | 3.77    | 0.0051      | 0.0053  | 3.77    |
| Comp Mole Frac (Ethylene)     | 0.2933     | 0.2933  | 0.00    | 0.2909      | 0.2909  | 0.00    | 0.2909      | 0.2909  | 0.00    |
| Comp Mole Frac (Ethane)       | 0.0521     | 0.0521  | 0.00    | 0.0516      | 0.0517  | 0.19    | 0.0516      | 0.0517  | 0.19    |
| Comp Mole Frac (Propadiene)   | 0.0049     | 0.0049  | 0.00    | 0.0049      | 0.0048  | 2.08    | 0.0049      | 0.0048  | 2.08    |
| Comp Mole Frac (Propene)      | 0.1088     | 0.109   | 0.18    | 0.1079      | 0.1081  | 0.19    | 0.1079      | 0.1081  | 0.19    |
| Comp Mole Frac (Propane)      | 0.0034     | 0.0034  | 0.00    | 0.0034      | 0.0033  | 3.03    | 0.0034      | 0.0033  | 3.03    |
| Comp Mole Frac (13-Butadiene) | 0.0211     | 0.0211  | 0.00    | 0.021       | 0.0209  | 0.48    | 0.021       | 0.0209  | 0.48    |
| Comp Mole Frac (1-Butene)     | 0.0289     | 0.0289  | 0.00    | 0.0286      | 0.0286  | 0.00    | 0.0286      | 0.0286  | 0.00    |
| Comp Mole Frac (n-Butane)     | 0.0096     | 0.0096  | 0.00    | 0.0095      | 0.0095  | 0.00    | 0.0095      | 0.0095  | 0.00    |
| Comp Mole Frac (i-Pentane)    | 0.0163     | 0.0162  | 0.62    | 0.0162      | 0.0161  | 0.62    | 0.0162      | 0.0161  | 0.62    |
| Comp Mole Frac (1-Hexyne)     | 0.0046     | 0.0046  | 0.00    | 0.0046      | 0.0046  | 0.00    | 0.0046      | 0.0046  | 0.00    |
| Comp Mole Frac (n-Heptane)    | 0.0013     | 0.0013  | 0.00    | 0.0013      | 0.0013  | 0.00    | 0.0013      | 0.0013  | 0.00    |
| Comp Mole Frac (n-Octane)     | 0.0001     | 0.0001  | 0.00    | 0.0001      | 0.0001  | 0.00    | 0.0001      | 0.0001  | 0.00    |
| Comp Mole Frac (Benzene)      | 0.0135     | 0.0135  | 0.00    | 0.0134      | 0.0134  | 0.00    | 0.0134      | 0.0134  | 0.00    |
| Comp Mole Frac (Toluene)      | 0.003      | 0.0031  | 3.23    | 0.003       | 0.003   | 0.00    | 0.003       | 0.003   | 0.00    |
| Comp Mole Frac (p-Xylene)     | 0.0001     | 0.0001  | 0.00    | 0.0001      | 0.0001  | 0.00    | 0.0001      | 0.0001  | 0.00    |
| Comp Mole Frac (E-Benzene)    | 0          | 0       | 0.00    | 0           | 0       | 0.00    | 0           | 0       | 0.00    |
| Comp Mole Frac (n-Nonane)     | 0          | 0       | 0.00    | 0           | 0       | 0.00    | 0           | 0       | 0.00    |
| Comp Mole Frac (Styrene)      | 0          | 0       | 0.00    | 0           | 0       | 0.00    | 0           | 0       | 0.00    |
| Comp Mole Frac (n-C11)        | 0          | 0       | 0.00    | 0           | 0       | 0.00    | 0           | 0       | 0.00    |
| Comp Mole Frac (n-Decane)     | 0          | 0       | 0.00    | 0           | 0       | 0.00    | 0           | 0       | 0.00    |
| Comp Mole Frac (H2O)          | 0.01       | 0.01    | 0.00    | 0.0181      | 0.0181  | 0.00    | 0.0181      | 0.0181  | 0.00    |
| Comp Mole Frac (Nitrogen)     | 0.0002     | 0.0002  | 0.00    | 0.0002      | 0.0002  | 0.00    | 0.0002      | 0.0002  | 0.00    |
|                               |            | 0.9999  |         |             | 0.9999  |         |             | 0.9999  |         |
|                               |            |         |         |             |         |         |             |         |         |
|                               | 3013       |         |         | 3014        |         |         | 3015        |         |         |
| Mass Flow (kg/h)              | 323352.1   | 323930  | 0.18    | 325554.502  | 325778  | 0.07    | 325554.502  | 325778  | 0.07    |
| Molar Flow (kgmole/h)         | 12405.5    | 12432.2 | 0.21    | 12515.2603  | 12534.7 | 0.16    | 12515.2603  | 12534.7 | 0.16    |
| Temperature (C)               | 45         | 45      | 0.00    | 89.99964268 | 90      | 0.00    | 41.22537917 | 41      | 0.55    |
| Pressure (kg/cm2_g)           | 8.74       | 8.74    | 0.00    | 18.85       | 18.85   | 0.00    | 18.43       | 18.43   | 0.00    |

# Simulation Report – ECC 860 KTA

## Working Stage 6

|                               | 3016       |         |         | 3017        |         |         | 3018        |         |         |
|-------------------------------|------------|---------|---------|-------------|---------|---------|-------------|---------|---------|
|                               | Simulation | Design  | %-Error | Simulation  | Design  | %-Error | Simulation  | Design  | %-Error |
| Comp Mole Frac (Hydrogen)     | 0.1519     | 0.1518  | 0.07    | 0.1548      | 0.1545  | 0.19    | 0.1548      | 0.1545  | 0.19    |
| Comp Mole Frac (CO)           | 0.0011     | 0.001   | 10.00   | 0.001       | 0.001   | 0.00    | 0.001       | 0.001   | 0.00    |
| Comp Mole Frac (CO2)          | 0          | 0       | 0.00    | 0           | 0       | 0.00    | 0           | 0       | 0.00    |
| Comp Mole Frac (H2S)          | 0          | 0       | 0.00    | 0           | 0       | 0.00    | 0           | 0       | 0.00    |
| Comp Mole Frac (Methane)      | 0.2706     | 0.2705  | 0.04    | 0.2639      | 0.2644  | 0.19    | 0.2639      | 0.2644  | 0.19    |
| Comp Mole Frac (Acetylene)    | 0.0052     | 0.0054  | 3.70    | 0.0049      | 0.0053  | 7.55    | 0.0049      | 0.0053  | 7.55    |
| Comp Mole Frac (Ethylene)     | 0.2933     | 0.2933  | 0.00    | 0.2959      | 0.2961  | 0.07    | 0.2959      | 0.2961  | 0.07    |
| Comp Mole Frac (Ethane)       | 0.052      | 0.0521  | 0.19    | 0.0536      | 0.0537  | 0.19    | 0.0536      | 0.0537  | 0.19    |
| Comp Mole Frac (Propadiene)   | 0.0049     | 0.0049  | 0.00    | 0.0052      | 0.0055  | 5.45    | 0.0052      | 0.0055  | 5.45    |
| Comp Mole Frac (Propene)      | 0.1088     | 0.1089  | 0.09    | 0.1225      | 0.1227  | 0.16    | 0.1225      | 0.1227  | 0.16    |
| Comp Mole Frac (Propane)      | 0.0034     | 0.0034  | 0.00    | 0.0039      | 0.0039  | 0.00    | 0.0039      | 0.0039  | 0.00    |
| Comp Mole Frac (13-Butadiene) | 0.0211     | 0.0211  | 0.00    | 0.0253      | 0.0245  | 3.27    | 0.0253      | 0.0245  | 3.27    |
| Comp Mole Frac (1-Butene)     | 0.0289     | 0.0289  | 0.00    | 0.035       | 0.0353  | 0.85    | 0.035       | 0.0353  | 0.85    |
| Comp Mole Frac (n-Butane)     | 0.0096     | 0.0096  | 0.00    | 0.0122      | 0.0126  | 3.17    | 0.0122      | 0.0126  | 3.17    |
| Comp Mole Frac (i-Pentane)    | 0.0163     | 0.0162  | 0.62    | 0.0135      | 0.0124  | 8.87    | 0.0135      | 0.0124  | 8.87    |
| Comp Mole Frac (1-Hexyne)     | 0.0046     | 0.0046  | 0.00    | 0.0012      | 0.0014  | 14.29   | 0.0012      | 0.0014  | 14.29   |
| Comp Mole Frac (n-Heptane)    | 0.0013     | 0.0013  | 0.00    | 0.0001      | 0.0001  | 0.00    | 0.0001      | 0.0001  | 0.00    |
| Comp Mole Frac (n-Octane)     | 0.0001     | 0.0001  | 0.00    | 0           | 0       | 0.00    | 0           | 0       | 0.00    |
| Comp Mole Frac (Benzene)      | 0.0135     | 0.0135  | 0.00    | 0.004       | 0.004   | 0.00    | 0.004       | 0.004   | 0.00    |
| Comp Mole Frac (Toluene)      | 0.003      | 0.0031  | 3.23    | 0.0003      | 0.0003  | 0.00    | 0.0003      | 0.0003  | 0.00    |
| Comp Mole Frac (p-Xylene)     | 0.0001     | 0.0001  | 0.00    | 0           | 0       | 0.00    | 0           | 0       | 0.00    |
| Comp Mole Frac (E-Benzene)    | 0          | 0       | 0.00    | 0           | 0       | 0.00    | 0           | 0       | 0.00    |
| Comp Mole Frac (n-Nonane)     | 0          | 0       | 0.00    | 0           | 0       | 0.00    | 0           | 0       | 0.00    |
| Comp Mole Frac (Styrene)      | 0          | 0       | 0.00    | 0           | 0       | 0.00    | 0           | 0       | 0.00    |
| Comp Mole Frac (n-C11)        | 0          | 0       | 0.00    | 0           | 0       | 0.00    | 0           | 0       | 0.00    |
| Comp Mole Frac (n-Decane)     | 0          | 0       | 0.00    | 0           | 0       | 0.00    | 0           | 0       | 0.00    |
| Comp Mole Frac (H2O)          | 0.0101     | 0.0102  | 0.98    | 0.0023      | 0.0023  | 0.00    | 0.0023      | 0.0023  | 0.00    |
| Comp Mole Frac (Nitrogen)     | 0.0002     | 0.0002  | 0.00    | 0.0003      | 0.0002  | 50.00   | 0.0003      | 0.0002  | 50.00   |
|                               |            | 1.0002  |         |             | 1.0002  |         |             | 1.0002  |         |
|                               |            |         |         |             |         |         |             |         |         |
|                               | 3016       |         |         | 3017        |         |         | 3018        |         |         |
| Mass Flow (kg/h)              | 323376.57  | 323976  | 0.19    | 335894.9412 | 335097  | 0.24    | 335894.9412 | 335097  | 0.24    |
| Molar Flow (kgmole/h)         | 12406.86   | 12434.7 | 0.22    | 13085.12549 | 13083.1 | 0.02    | 13085.12549 | 13083.1 | 0.02    |
| Temperature (C)               | 45.31      | 45.3    | 0.02    | 30.70000582 | 30.7    | 0.00    | 82.80521434 | 82.8    | 0.01    |
| Pressure (kg/cm2_g)           | 8.78       | 8.78    | 0.00    | 18.31       | 18.31   | 0.00    | 38.28       | 38.28   | 0.00    |

# Simulation Report – ECC 860 KTA

## Working Stage 6

|                               | 3019        |         |         | 3020   |        |         | 3021       |        |         |
|-------------------------------|-------------|---------|---------|--------|--------|---------|------------|--------|---------|
|                               | Simulation  | Design  | %-Error | 0.27   | Design | %-Error | Simulation | Design | %-Error |
| Comp Mole Frac (Hydrogen)     | 0.1548      | 0.1545  | 0.19    | 0.00   | 0.1565 | 0.38    | 0.1571     | 0.1565 | 0.38    |
| Comp Mole Frac (CO)           | 0.001       | 0.001   | 0.00    | 0.00   | 0.001  | 10.00   | 0.0011     | 0.001  | 10.00   |
| Comp Mole Frac (CO2)          | 0           | 0       | 0.00    | 0      | 0      | 0.00    | 0          | 0      | 0.00    |
| Comp Mole Frac (H2S)          | 0           | 0       | 0.00    | 0      | 0      | 0.00    | 0          | 0      | 0.00    |
| Comp Mole Frac (Methane)      | 0.2639      | 0.2644  | 0.19    | 0.269  | 0.269  | 0.00    | 0.269      | 0.269  | 0.00    |
| Comp Mole Frac (Acetylene)    | 0.0049      | 0.0053  | 7.55    | 0.005  | 0.0054 | 7.41    | 0.005      | 0.0054 | 7.41    |
| Comp Mole Frac (Ethylene)     | 0.2959      | 0.2961  | 0.07    | 0.3054 | 0.3054 | 0.00    | 0.3054     | 0.3054 | 0.00    |
| Comp Mole Frac (Ethane)       | 0.0536      | 0.0537  | 0.19    | 0.0554 | 0.0555 | 0.18    | 0.0554     | 0.0555 | 0.18    |
| Comp Mole Frac (Propadiene)   | 0.0052      | 0.0055  | 5.45    | 0.0053 | 0.0055 | 3.64    | 0.0053     | 0.0055 | 3.64    |
| Comp Mole Frac (Propene)      | 0.1225      | 0.1227  | 0.16    | 0.1258 | 0.1262 | 0.32    | 0.1258     | 0.1262 | 0.32    |
| Comp Mole Frac (Propane)      | 0.0039      | 0.0039  | 0.00    | 0.004  | 0.0039 | 2.56    | 0.004      | 0.0039 | 2.56    |
| Comp Mole Frac (13-Butadiene) | 0.0253      | 0.0245  | 3.27    | 0.0212 | 0.0211 | 0.47    | 0.0212     | 0.0211 | 0.47    |
| Comp Mole Frac (1-Butene)     | 0.035       | 0.0353  | 0.85    | 0.0298 | 0.0304 | 1.97    | 0.0298     | 0.0304 | 1.97    |
| Comp Mole Frac (n-Butane)     | 0.0122      | 0.0126  | 3.17    | 0.01   | 0.0104 | 3.85    | 0.01       | 0.0104 | 3.85    |
| Comp Mole Frac (i-Pentane)    | 0.0135      | 0.0124  | 8.87    | 0.0076 | 0.0064 | 18.75   | 0.0076     | 0.0064 | 18.75   |
| Comp Mole Frac (1-Hexyne)     | 0.0012      | 0.0014  | 14.29   | 0.0003 | 0.0003 | 0.00    | 0.0003     | 0.0003 | 0.00    |
| Comp Mole Frac (n-Heptane)    | 0.0001      | 0.0001  | 0.00    | 0      | 0      | 0.00    | 0          | 0      | 0.00    |
| Comp Mole Frac (n-Octane)     | 0           | 0       | 0.00    | 0      | 0      | 0.00    | 0          | 0      | 0.00    |
| Comp Mole Frac (Benzene)      | 0.004       | 0.004   | 0.00    | 0.0012 | 0.0011 | 9.09    | 0.0012     | 0.0011 | 9.09    |
| Comp Mole Frac (Toluene)      | 0.0003      | 0.0003  | 0.00    | 0      | 0      | 0.00    | 0          | 0      | 0.00    |
| Comp Mole Frac (p-Xylene)     | 0           | 0       | 0.00    | 0      | 0      | 0.00    | 0          | 0      | 0.00    |
| Comp Mole Frac (E-Benzene)    | 0           | 0       | 0.00    | 0      | 0      | 0.00    | 0          | 0      | 0.00    |
| Comp Mole Frac (n-Nonane)     | 0           | 0       | 0.00    | 0      | 0      | 0.00    | 0          | 0      | 0.00    |
| Comp Mole Frac (Styrene)      | 0           | 0       | 0.00    | 0      | 0      | 0.00    | 0          | 0      | 0.00    |
| Comp Mole Frac (n-C11)        | 0           | 0       | 0.00    | 0      | 0      | 0.00    | 0          | 0      | 0.00    |
| Comp Mole Frac (n-Decane)     | 0           | 0       | 0.00    | 0      | 0      | 0.00    | 0          | 0      | 0.00    |
| Comp Mole Frac (H2O)          | 0.0023      | 0.0023  | 0.00    | 0.0015 | 0.0015 | 0.00    | 0.0015     | 0.0015 | 0.00    |
| Comp Mole Frac (Nitrogen)     | 0.0003      | 0.0002  | 50.00   | 0.0003 | 0.0002 | 50.00   | 0.0003     | 0.0002 | 50.00   |
|                               |             | 1.0002  |         |        | 0.9998 |         |            | 0.9998 |         |
|                               |             |         |         |        |        |         |            |        |         |
|                               | 3019        |         |         | 3020   |        |         | 3021       |        |         |
| Mass Flow (kg/h)              | 335894.9412 | 335097  | 0.24    | 0.27   | 320223 | 0.20    | 319389.42  | 320223 | 0.26    |
| Molar Flow (kgmole/h)         | 13085.12549 | 13083.1 | 0.02    | 0.00   | 12913  | 0.23    | 12878.16   | 12913  | 0.27    |
| Temperature (C)               | 40.80639307 | 41      | 0.47    | 0.00   | 35.5   | 0.00    | 27.3       | 27.3   | 0.00    |
| Pressure (kg/cm2_g)           | 37.81       | 37.81   | 0.00    | 37.47  | 37.47  | 0.00    | 37.31      | 37.31  | 0.00    |



# Simulation Report – ECC 860 KTA

## Working Stage 6

|                               | 3022       |        |         | 3023       |         |         | 3029       |        |         |
|-------------------------------|------------|--------|---------|------------|---------|---------|------------|--------|---------|
|                               | Simulation | Design | %-Error | Simulation | Design  | %-Error | Simulation | Design | %-Error |
| Comp Mole Frac (Hydrogen)     | 0.1571     | 0.1565 | 0.38    | 0.1801     | 0.1795  | 0.33    | 0          | 0      | 0.00    |
| Comp Mole Frac (CO)           | 0.0011     | 0.001  | 10.00   | 0.0012     | 0.0011  | 9.09    | 0          | 0      | 0.00    |
| Comp Mole Frac (CO2)          | 0          | 0      | 0.00    | 0          | 0       | 0.00    | 0          | 0      | 0.00    |
| Comp Mole Frac (H2S)          | 0          | 0      | 0.00    | 0          | 0       | 0.00    | 0          | 0      | 0.00    |
| Comp Mole Frac (Methane)      | 0.269      | 0.269  | 0.00    | 0.2994     | 0.2994  | 0.00    | 0          | 0      | 0.00    |
| Comp Mole Frac (Acetylene)    | 0.005      | 0.0054 | 7.41    | 0.0057     | 0.0057  | 0.00    | 0          | 0      | 0.00    |
| Comp Mole Frac (Ethylene)     | 0.3054     | 0.3054 | 0.00    | 0.3141     | 0.314   | 0.03    | 0          | 0      | 0.00    |
| Comp Mole Frac (Ethane)       | 0.0554     | 0.0555 | 0.18    | 0.0549     | 0.0549  | 0.00    | 0          | 0      | 0.00    |
| Comp Mole Frac (Propadiene)   | 0.0053     | 0.0055 | 3.64    | 0.0045     | 0.0042  | 7.14    | 0          | 0      | 0.00    |
| Comp Mole Frac (Propene)      | 0.1258     | 0.1262 | 0.32    | 0.1025     | 0.1027  | 0.19    | 0          | 0      | 0.00    |
| Comp Mole Frac (Propane)      | 0.004      | 0.0039 | 2.56    | 0.0031     | 0.0031  | 0.00    | 0          | 0      | 0.00    |
| Comp Mole Frac (13-Butadiene) | 0.0212     | 0.0211 | 0.47    | 0.0108     | 0.0112  | 3.57    | 0          | 0      | 0.00    |
| Comp Mole Frac (1-Butene)     | 0.0298     | 0.0304 | 1.97    | 0.0155     | 0.016   | 3.13    | 0          | 0      | 0.00    |
| Comp Mole Frac (n-Butane)     | 0.01       | 0.0104 | 3.85    | 0.0049     | 0.005   | 2.00    | 0          | 0      | 0.00    |
| Comp Mole Frac (i-Pentane)    | 0.0076     | 0.0064 | 18.75   | 0.0024     | 0.0018  | 33.33   | 0          | 0      | 0.00    |
| Comp Mole Frac (1-Hexyne)     | 0.0003     | 0.0003 | 0.00    | 0          | 0       | 0.00    | 0          | 0      | 0.00    |
| Comp Mole Frac (n-Heptane)    | 0          | 0      | 0.00    | 0          | 0       | 0.00    | 0          | 0      | 0.00    |
| Comp Mole Frac (n-Octane)     | 0          | 0      | 0.00    | 0          | 0       | 0.00    | 0          | 0      | 0.00    |
| Comp Mole Frac (Benzene)      | 0.0012     | 0.0011 | 9.09    | 0.0002     | 0.0002  | 0.00    | 0          | 0      | 0.00    |
| Comp Mole Frac (Toluene)      | 0          | 0      | 0.00    | 0          | 0       | 0.00    | 0          | 0      | 0.00    |
| Comp Mole Frac (p-Xylene)     | 0          | 0      | 0.00    | 0          | 0       | 0.00    | 0          | 0      | 0.00    |
| Comp Mole Frac (E-Benzene)    | 0          | 0      | 0.00    | 0          | 0       | 0.00    | 0          | 0      | 0.00    |
| Comp Mole Frac (n-Nonane)     | 0          | 0      | 0.00    | 0          | 0       | 0.00    | 0          | 0      | 0.00    |
| Comp Mole Frac (Styrene)      | 0          | 0      | 0.00    | 0          | 0       | 0.00    | 0          | 0      | 0.00    |
| Comp Mole Frac (n-C11)        | 0          | 0      | 0.00    | 0          | 0       | 0.00    | 0          | 0      | 0.00    |
| Comp Mole Frac (n-Decane)     | 0          | 0      | 0.00    | 0          | 0       | 0.00    | 0          | 0      | 0.00    |
| Comp Mole Frac (H2O)          | 0.0015     | 0.0015 | 0.00    | 0.0005     | 0.0007  | 28.57   | 1          | 1      | 0.00    |
| Comp Mole Frac (Nitrogen)     | 0.0003     | 0.0002 | 50.00   | 0.0003     | 0.0003  | 0.00    | 0          | 0      | 0.00    |
|                               |            | 0.9998 |         |            | 0.9998  |         |            | 1      |         |
|                               |            |        |         |            |         |         |            |        |         |
|                               | 3022       |        |         | 3023       |         |         | 3029       |        |         |
| Mass Flow (kg/h)              | 319389.42  | 320223 | 0.26    | 250014.32  | 250508  | 0.20    | 3994.25    | 3934   | 1.53    |
| Molar Flow (kgmole/h)         | 12878.16   | 12913  | 0.27    | 11171.17   | 11184.8 | 0.12    | 221.72     | 218.4  | 1.52    |
| Temperature (C)               | 16         | 16     | 0.00    | 19.68      | 15.9    | 23.77   | 45.01      | 45     | 0.02    |
| Pressure (kg/cm2_g)           | 37.07      | 37.07  | 0.00    | 36.94      | 36.94   | 0.00    | 8.74       | 8.74   | 0.00    |

# Simulation Report – ECC 860 KTA

## Working Stage 6

|                               | 3030       |        |         | 3031       |        |         | 3032       |        |         |
|-------------------------------|------------|--------|---------|------------|--------|---------|------------|--------|---------|
|                               | Simulation | Design | %-Error | Simulation | Design | %-Error | Simulation | Design | %-Error |
| Comp Mole Frac (Hydrogen)     | 0          | 0      | 0.00    | 0.0069     | 0.0069 | 0.00    | 0          | 0      | 0.00    |
| Comp Mole Frac (CO)           | 0          | 0      | 0.00    | 0.0001     | 0      | 0.00    | 0          | 0      | 0.00    |
| Comp Mole Frac (CO2)          | 0          | 0      | 0.00    | 0          | 0      | 0.00    | 0          | 0      | 0.00    |
| Comp Mole Frac (H2S)          | 0          | 0      | 0.00    | 0          | 0      | 0.00    | 0          | 0      | 0.00    |
| Comp Mole Frac (Methane)      | 0          | 0      | 0.00    | 0.0569     | 0.0583 | 2.40    | 0          | 0      | 0.00    |
| Comp Mole Frac (Acetylene)    | 0          | 0      | 0.00    | 0.0003     | 0.0027 | 88.89   | 0          | 0      | 0.00    |
| Comp Mole Frac (Ethylene)     | 0          | 0      | 0.00    | 0.1909     | 0.1915 | 0.31    | 0          | 0      | 0.00    |
| Comp Mole Frac (Ethane)       | 0          | 0      | 0.00    | 0.0465     | 0.0468 | 0.64    | 0          | 0      | 0.00    |
| Comp Mole Frac (Propadiene)   | 0          | 0      | 0.00    | 0.0095     | 0.0128 | 25.78   | 0          | 0      | 0.00    |
| Comp Mole Frac (Propene)      | 0          | 0      | 0.00    | 0.2413     | 0.2418 | 0.21    | 0          | 0      | 0.00    |
| Comp Mole Frac (Propane)      | 0          | 0      | 0.00    | 0.0085     | 0.0085 | 0.00    | 0          | 0      | 0.00    |
| Comp Mole Frac (13-Butadiene) | 0          | 0      | 0.00    | 0.1108     | 0.1035 | 7.05    | 0          | 0      | 0.00    |
| Comp Mole Frac (1-Butene)     | 0          | 0      | 0.00    | 0.1505     | 0.1497 | 0.53    | 0          | 0      | 0.00    |
| Comp Mole Frac (n-Butane)     | 0          | 0      | 0.00    | 0.0551     | 0.0573 | 3.84    | 0          | 0      | 0.00    |
| Comp Mole Frac (i-Pentane)    | 0          | 0      | 0.00    | 0.0791     | 0.0749 | 5.61    | 0          | 0      | 0.00    |
| Comp Mole Frac (1-Hexyne)     | 0          | 0      | 0.00    | 0.0079     | 0.0093 | 15.05   | 0          | 0      | 0.00    |
| Comp Mole Frac (n-Heptane)    | 0          | 0      | 0.00    | 0.0009     | 0.001  | 10.00   | 0          | 0      | 0.00    |
| Comp Mole Frac (n-Octane)     | 0          | 0      | 0.00    | 0          | 0      | 0.00    | 0          | 0      | 0.00    |
| Comp Mole Frac (Benzene)      | 0          | 0      | 0.00    | 0.0264     | 0.0264 | 0.00    | 0          | 0      | 0.00    |
| Comp Mole Frac (Toluene)      | 0          | 0      | 0.00    | 0.0022     | 0.0022 | 0.00    | 0          | 0      | 0.00    |
| Comp Mole Frac (p-Xylene)     | 0          | 0      | 0.00    | 0          | 0      | 0.00    | 0          | 0      | 0.00    |
| Comp Mole Frac (E-Benzene)    | 0          | 0      | 0.00    | 0          | 0      | 0.00    | 0          | 0      | 0.00    |
| Comp Mole Frac (n-Nonane)     | 0          | 0      | 0.00    | 0          | 0      | 0.00    | 0          | 0      | 0.00    |
| Comp Mole Frac (Styrene)      | 0          | 0      | 0.00    | 0          | 0      | 0.00    | 0          | 0      | 0.00    |
| Comp Mole Frac (n-C11)        | 0          | 0      | 0.00    | 0          | 0      | 0.00    | 0          | 0      | 0.00    |
| Comp Mole Frac (n-Decane)     | 0          | 0      | 0.00    | 0          | 0      | 0.00    | 0          | 0      | 0.00    |
| Comp Mole Frac (H2O)          | 1          | 1      | 0.00    | 0.006      | 0.0063 | 4.76    | 1          | 1      | 0.00    |
| Comp Mole Frac (Nitrogen)     | 0          | 0      | 0.00    | 0          | 0      | 0.00    | 0          | 0      | 0.00    |
|                               |            | 1      |         |            | 0.9999 |         |            | 1      |         |
|                               |            |        |         |            |        |         |            |        |         |
|                               | 3030       |        |         | 3031       |        |         | 3032       |        |         |
| Mass Flow (kg/h)              | 3969.8     | 3888   | 2.10    | 85437.94   | 84394  | 1.24    | 245.19     | 195    | 25.74   |
| Molar Flow (kgmole/h)         | 220.36     | 215.8  | 2.11    | 1895.28    | 1887.5 | 0.41    | 13.61      | 10.8   | 26.02   |
| Temperature (C)               | 30.7       | 30.7   | 0.00    | 35.5       | 35.5   | 0.00    | 15.9       | 15.9   | 0.00    |
| Pressure (kg/cm2_g)           | 18.31      | 18.31  | 0.00    | 37.47      | 37.47  | 0.00    | 36.94      | 36.94  | 0.00    |

**Simulation Report – ECC 860 KTA**  
**Working Stage 6**

---

|                               | 3033       |        |         | 3034       |        |         | 3039       |        |         |
|-------------------------------|------------|--------|---------|------------|--------|---------|------------|--------|---------|
|                               | Simulation | Design | %-Error | Simulation | Design | %-Error | Simulation | Design | %-Error |
| Comp Mole Frac (Hydrogen)     | 0.0073     | 0.0073 | 0.00    | 0.0026     | 0.0026 | 0.00    | 0.0069     | 0.0069 | 0.00    |
| Comp Mole Frac (CO)           | 0.0001     | 0      | 0.00    | 0          | 0      | 0.00    | 0.0001     | 0      | 0.00    |
| Comp Mole Frac (CO2)          | 0          | 0      | 0.00    | 0          | 0      | 0.00    | 0          | 0      | 0.00    |
| Comp Mole Frac (H2S)          | 0          | 0      | 0.00    | 0          | 0      | 0.00    | 0          | 0      | 0.00    |
| Comp Mole Frac (Methane)      | 0.071      | 0.0724 | 1.93    | 0.0276     | 0.0292 | 5.48    | 0.0569     | 0.0583 | 2.40    |
| Comp Mole Frac (Acetylene)    | 0.0005     | 0.0034 | 85.29   | 0.0001     | 0.0019 | 94.74   | 0.0003     | 0.0027 | 88.89   |
| Comp Mole Frac (Ethylene)     | 0.2509     | 0.2509 | 0.00    | 0.1023     | 0.104  | 1.63    | 0.1909     | 0.1915 | 0.31    |
| Comp Mole Frac (Ethane)       | 0.0598     | 0.0599 | 0.17    | 0.0258     | 0.0264 | 2.27    | 0.0465     | 0.0468 | 0.64    |
| Comp Mole Frac (Propadiene)   | 0.0109     | 0.014  | 22.14   | 0.0081     | 0.0103 | 21.36   | 0.0095     | 0.0128 | 25.78   |
| Comp Mole Frac (Propene)      | 0.2803     | 0.2804 | 0.04    | 0.1602     | 0.1596 | 0.38    | 0.2413     | 0.2418 | 0.21    |
| Comp Mole Frac (Propane)      | 0.0097     | 0.0096 | 1.04    | 0.0058     | 0.0058 | 0.00    | 0.0085     | 0.0085 | 0.00    |
| Comp Mole Frac (13-Butadiene) | 0.09       | 0.0853 | 5.51    | 0.1104     | 0.1058 | 4.35    | 0.1108     | 0.1035 | 7.05    |
| Comp Mole Frac (1-Butene)     | 0.1245     | 0.1246 | 0.08    | 0.1449     | 0.1396 | 3.80    | 0.1505     | 0.1497 | 0.53    |
| Comp Mole Frac (n-Butane)     | 0.0433     | 0.0453 | 4.42    | 0.0562     | 0.0546 | 2.93    | 0.0551     | 0.0573 | 3.84    |
| Comp Mole Frac (i-Pentane)    | 0.0417     | 0.0362 | 15.19   | 0.138      | 0.1414 | 2.40    | 0.0791     | 0.0749 | 5.61    |
| Comp Mole Frac (1-Hexyne)     | 0.0018     | 0.0023 | 21.74   | 0.0445     | 0.0443 | 0.45    | 0.0079     | 0.0093 | 15.05   |
| Comp Mole Frac (n-Heptane)    | 0.0001     | 0.0001 | 0.00    | 0.0123     | 0.0125 | 1.60    | 0.0009     | 0.001  | 10.00   |
| Comp Mole Frac (n-Octane)     | 0          | 0      | 0.00    | 0.0009     | 0.0012 | 25.00   | 0          | 0      | 0.00    |
| Comp Mole Frac (Benzene)      | 0.0075     | 0.0073 | 2.74    | 0.1291     | 0.1284 | 0.55    | 0.0264     | 0.0264 | 0.00    |
| Comp Mole Frac (Toluene)      | 0.0003     | 0.0003 | 0.00    | 0.0293     | 0.0294 | 0.34    | 0.0022     | 0.0022 | 0.00    |
| Comp Mole Frac (p-Xylene)     | 0          | 0      | 0.00    | 0.0009     | 0.0007 | 28.57   | 0          | 0      | 0.00    |
| Comp Mole Frac (E-Benzene)    | 0          | 0      | 0.00    | 0          | 0      | 0.00    | 0          | 0      | 0.00    |
| Comp Mole Frac (n-Nonane)     | 0          | 0      | 0.00    | 0          | 0      | 0.00    | 0          | 0      | 0.00    |
| Comp Mole Frac (Styrene)      | 0          | 0      | 0.00    | 0          | 0.0002 | 100.00  | 0          | 0      | 0.00    |
| Comp Mole Frac (n-C11)        | 0          | 0      | 0.00    | 0          | 0      | 0.00    | 0          | 0      | 0.00    |
| Comp Mole Frac (n-Decane)     | 0          | 0      | 0.00    | 0          | 0      | 0.00    | 0          | 0      | 0.00    |
| Comp Mole Frac (H2O)          | 0.0004     | 0.0007 | 42.86   | 0.0009     | 0.0023 | 60.87   | 0.006      | 0.0063 | 4.76    |
| Comp Mole Frac (Nitrogen)     | 0          | 0      | 0.00    | 0          | 0      | 0.00    | 0          | 0      | 0.00    |
|                               |            | 1      |         |            | 1.0002 |         |            | 0.9999 |         |
|                               |            |        |         |            |        |         |            |        |         |
|                               | 3033       |        |         | 3034       |        |         | 3039       |        |         |
| Mass Flow (kg/h)              | 69129.91   | 69520  | 0.56    | 72463.38   | 72629  | 0.23    | 85438.22   | 84394  | 1.24    |
| Molar Flow (kgmole/h)         | 1693.38    | 1717.5 | 1.40    | 1279.15    | 1291.7 | 0.97    | 1895.29    | 1887.5 | 0.41    |
| Temperature (C)               | 15.9       | 15.9   | 0.00    | 30.7       | 30.7   | 0.00    | 25.6       | 25.6   | 0.00    |
| Pressure (kg/cm2_g)           | 36.94      | 36.94  | 0.00    | 18.31      | 18.31  | 0.00    | 18.43      | 18.43  | 0.00    |

# Simulation Report – ECC 860 KTA

## Working Stage 6

|                               | 3050       |         |         | 3080       |        |         | 3201       |        |         |
|-------------------------------|------------|---------|---------|------------|--------|---------|------------|--------|---------|
|                               | Simulation | Design  | %-Error | Simulation | Design | %-Error | Simulation | Design | %-Error |
| Comp Mole Frac (Hydrogen)     | 0.1378     | 0.1374  | 0.29    | 0          | 0      | 0.00    | 0.0026     | 0.0026 | 0.00    |
| Comp Mole Frac (CO)           | 0.0009     | 0.0009  | 0.00    | 0          | 0      | 0.00    | 0          | 0      | 0.00    |
| Comp Mole Frac (CO2)          | 0          | 0       | 0.00    | 0          | 0      | 0.00    | 0          | 0      | 0.00    |
| Comp Mole Frac (H2S)          | 0          | 0       | 0.00    | 0          | 0      | 0.00    | 0          | 0      | 0.00    |
| Comp Mole Frac (Methane)      | 0.2418     | 0.2421  | 0.12    | 0          | 0      | 0.00    | 0.0276     | 0.0292 | 5.48    |
| Comp Mole Frac (Acetylene)    | 0.0044     | 0.0051  | 13.73   | 0          | 0      | 0.00    | 0.0001     | 0.0019 | 94.74   |
| Comp Mole Frac (Ethylene)     | 0.2907     | 0.2908  | 0.03    | 0          | 0      | 0.00    | 0.1023     | 0.104  | 1.63    |
| Comp Mole Frac (Ethane)       | 0.0543     | 0.0544  | 0.18    | 0          | 0      | 0.00    | 0.0258     | 0.0264 | 2.27    |
| Comp Mole Frac (Propadiene)   | 0.0059     | 0.0064  | 7.81    | 0          | 0      | 0.00    | 0.0081     | 0.0103 | 21.36   |
| Comp Mole Frac (Propene)      | 0.1406     | 0.141   | 0.28    | 0          | 0      | 0.00    | 0.1602     | 0.1596 | 0.38    |
| Comp Mole Frac (Propane)      | 0.0045     | 0.0045  | 0.00    | 0          | 0      | 0.00    | 0.0058     | 0.0058 | 0.00    |
| Comp Mole Frac (13-Butadiene) | 0.0327     | 0.0316  | 3.48    | 0          | 0      | 0.00    | 0.1104     | 0.1058 | 4.35    |
| Comp Mole Frac (1-Butene)     | 0.0453     | 0.0457  | 0.88    | 0          | 0      | 0.00    | 0.1449     | 0.1396 | 3.80    |
| Comp Mole Frac (n-Butane)     | 0.0158     | 0.0164  | 3.66    | 0          | 0      | 0.00    | 0.0562     | 0.0546 | 2.93    |
| Comp Mole Frac (i-Pentane)    | 0.0167     | 0.0151  | 10.60   | 0          | 0      | 0.00    | 0.138      | 0.1414 | 2.40    |
| Comp Mole Frac (1-Hexyne)     | 0.0012     | 0.0015  | 20.00   | 0          | 0      | 0.00    | 0.0445     | 0.0443 | 0.45    |
| Comp Mole Frac (n-Heptane)    | 0.0001     | 0.0001  | 0.00    | 0          | 0      | 0.00    | 0.0123     | 0.0125 | 1.60    |
| Comp Mole Frac (n-Octane)     | 0          | 0       | 0.00    | 0          | 0      | 0.00    | 0.0009     | 0.0012 | 25.00   |
| Comp Mole Frac (Benzene)      | 0.0044     | 0.0044  | 0.00    | 0          | 0      | 0.00    | 0.1291     | 0.1284 | 0.55    |
| Comp Mole Frac (Toluene)      | 0.0003     | 0.0003  | 0.00    | 0          | 0      | 0.00    | 0.0293     | 0.0294 | 0.34    |
| Comp Mole Frac (p-Xylene)     | 0          | 0       | 0.00    | 0          | 0      | 0.00    | 0.0009     | 0.0007 | 28.57   |
| Comp Mole Frac (E-Benzene)    | 0          | 0       | 0.00    | 0          | 0      | 0.00    | 0          | 0      | 0.00    |
| Comp Mole Frac (n-Nonane)     | 0          | 0       | 0.00    | 0          | 0      | 0.00    | 0          | 0      | 0.00    |
| Comp Mole Frac (Styrene)      | 0          | 0       | 0.00    | 0          | 0      | 0.00    | 0          | 0.0002 | 100.00  |
| Comp Mole Frac (n-C11)        | 0          | 0       | 0.00    | 0          | 0      | 0.00    | 0          | 0      | 0.00    |
| Comp Mole Frac (n-Decane)     | 0          | 0       | 0.00    | 0          | 0      | 0.00    | 0          | 0      | 0.00    |
| Comp Mole Frac (H2O)          | 0.0021     | 0.0021  | 0.00    | 1          | 1      | 0.00    | 0.0009     | 0.0023 | 60.87   |
| Comp Mole Frac (Nitrogen)     | 0.0002     | 0.0002  | 0.00    | 0          | 0      | 0.00    | 0          | 0      | 0.00    |
|                               |            | 1       |         |            | 1      |         |            | 1.0002 |         |
|                               |            |         |         |            |        |         |            |        |         |
|                               | 3050       |         |         | 3080       |        |         | 3201       |        |         |
| Mass Flow (kg/h)              | 404827.37  | 404617  | 0.05    | 1847       | 1847   | 0.00    | 72463.38   | 72629  | 0.23    |
| Molar Flow (kgmole/h)         | 14773.44   | 14800.6 | 0.18    | 102.53     | 102.5  | 0.03    | 1279.15    | 1291.7 | 0.97    |
| Temperature (C)               | 35.67      | 35.5    | 0.48    | 147        | 147    | 0.00    | 24.44      | 23.6   | 3.56    |
| Pressure (kg/cm2_g)           | 37.51      | 37.51   | 0.00    | 19.47      | 19.47  | 0.00    | 9.27       | 9.27   | 0.00    |

# Simulation Report – ECC 860 KTA

## Working Stage 6

|                               | 3202        |        |         | 3203       |        |         | 3206       |        |         |
|-------------------------------|-------------|--------|---------|------------|--------|---------|------------|--------|---------|
|                               | Simulation  | Design | %-Error | Simulation | Design | %-Error | Simulation | Design | %-Error |
| Comp Mole Frac (Hydrogen)     | 1.02E-02    | 0.01   | 1.70    | 0          | 0      | 0.00    | 0          | 0      | 0.00    |
| Comp Mole Frac (CO)           | 1.89E-04    | 0      | 0.00    | 0          | 0      | 0.00    | 0          | 0      | 0.00    |
| Comp Mole Frac (CO2)          | 0           | 0      | 0.00    | 0          | 0      | 0.00    | 0          | 0      | 0.00    |
| Comp Mole Frac (H2S)          | 0           | 0      | 0.00    | 0          | 0      | 0.00    | 0          | 0      | 0.00    |
| Comp Mole Frac (Methane)      | 0.110122408 | 0.1132 | 2.72    | 0          | 0      | 0.00    | 0          | 0      | 0.00    |
| Comp Mole Frac (Acetylene)    | 3.86E-04    | 0.0073 | 94.71   | 0          | 0      | 0.00    | 0          | 0      | 0.00    |
| Comp Mole Frac (Ethylene)     | 0.40787978  | 0.4035 | 1.09    | 0          | 0      | 0.00    | 0          | 0      | 0.00    |
| Comp Mole Frac (Ethane)       | 0.102302368 | 0.1025 | 0.19    | 0.0002     | 0      | 0.00    | 0.0002     | 0      | 0.00    |
| Comp Mole Frac (Propadiene)   | 8.44E-03    | 0.0088 | 4.07    | 0.008      | 0.0108 | 25.93   | 0.008      | 0.0108 | 25.93   |
| Comp Mole Frac (Propene)      | 0.201834823 | 0.2029 | 0.52    | 0.1463     | 0.1448 | 1.04    | 0.1463     | 0.1448 | 1.04    |
| Comp Mole Frac (Propane)      | 6.41E-03    | 0.0063 | 1.82    | 0.0056     | 0.0056 | 0.00    | 0.0056     | 0.0056 | 0.00    |
| Comp Mole Frac (13-Butadiene) | 4.16E-02    | 0.0388 | 7.25    | 0.1334     | 0.1292 | 3.25    | 0.1334     | 0.1292 | 3.25    |
| Comp Mole Frac (1-Butene)     | 5.76E-02    | 0.0561 | 2.59    | 0.1742     | 0.1688 | 3.20    | 0.1742     | 0.1688 | 3.20    |
| Comp Mole Frac (n-Butane)     | 1.99E-02    | 0.0199 | 0.10    | 0.0683     | 0.0667 | 2.40    | 0.0683     | 0.0667 | 2.40    |
| Comp Mole Frac (i-Pentane)    | 2.13E-02    | 0.0186 | 14.69   | 0.1771     | 0.1842 | 3.85    | 0.1771     | 0.1842 | 3.85    |
| Comp Mole Frac (1-Hexyne)     | 1.76E-03    | 0.002  | 12.11   | 0.0588     | 0.0591 | 0.51    | 0.0588     | 0.0591 | 0.51    |
| Comp Mole Frac (n-Heptane)    | 1.80E-04    | 0.0002 | 9.95    | 0.0164     | 0.0168 | 2.38    | 0.0164     | 0.0168 | 2.38    |
| Comp Mole Frac (n-Octane)     | 4.92E-06    | 0      | 0.00    | 0.0013     | 0.0016 | 18.75   | 0.0013     | 0.0016 | 18.75   |
| Comp Mole Frac (Benzene)      | 5.99E-03    | 0.0057 | 5.10    | 0.1703     | 0.1713 | 0.58    | 0.1703     | 0.1713 | 0.58    |
| Comp Mole Frac (Toluene)      | 4.61E-04    | 0.0004 | 15.37   | 0.039      | 0.0395 | 1.27    | 0.039      | 0.0395 | 1.27    |
| Comp Mole Frac (p-Xylene)     | 5.99E-06    | 0      | 0.00    | 0.0013     | 0.0009 | 44.44   | 0.0013     | 0.0009 | 44.44   |
| Comp Mole Frac (E-Benzene)    | 0           | 0      | 0.00    | 0          | 0      | 0.00    | 0          | 0      | 0.00    |
| Comp Mole Frac (n-Nonane)     | 0           | 0      | 0.00    | 0          | 0      | 0.00    | 0          | 0      | 0.00    |
| Comp Mole Frac (Styrene)      | 0           | 0      | 0.00    | 0          | 0.0003 | 100.00  | 0          | 0.0003 | 100.00  |
| Comp Mole Frac (n-C11)        | 0           | 0      | 0.00    | 0          | 0      | 0.00    | 0          | 0      | 0.00    |
| Comp Mole Frac (n-Decane)     | 0           | 0      | 0.00    | 0          | 0      | 0.00    | 0          | 0      | 0.00    |
| Comp Mole Frac (H2O)          | 3.40E-03    | 0.0036 | 5.58    | 0          | 0.0002 | 100.00  | 0          | 0.0002 | 100.00  |
| Comp Mole Frac (Nitrogen)     | 4.09E-05    | 0      | 0.00    | 0          | 0      | 0.00    | 0          | 0      | 0.00    |
|                               |             | 0.9998 |         |            | 0.9998 |         |            | 0.9998 |         |
|                               |             |        |         |            |        |         |            |        |         |
|                               | 3202        |        |         | 3203       |        |         | 3206       |        |         |
| Mass Flow (kg/h)              | 11059.56191 | 11331  | 2.40    | 61730.86   | 61270  | 0.75    | 61730.86   | 61270  | 0.75    |
| Molar Flow (kgmole/h)         | 315.24      | 332.8  | 5.28    | 963.91     | 957.4  | 0.68    | 963.91     | 957.4  | 0.68    |
| Temperature (C)               | 26.15       | 26.7   | 2.06    | 77.41      | 77.8   | 0.50    | 41         | 41     | 0.00    |
| Pressure (kg/cm2_g)           | 8.78        | 8.77   | 0.11    | 8.97       | 8.97   | 0.00    | 8.62       | 8.62   | 0.00    |

---

160

# Simulation Report – ECC 860 KTA

## Working Stage 6

|                               | 4763       |        |         |
|-------------------------------|------------|--------|---------|
|                               | Simulation | Design | %-Error |
| Comp Mole Frac (Hydrogen)     | 0          | 0      | 0.00    |
| Comp Mole Frac (CO)           | 0          | 0      | 0.00    |
| Comp Mole Frac (CO2)          | 0          | 0      | 0.00    |
| Comp Mole Frac (H2S)          | 0          | 0      | 0.00    |
| Comp Mole Frac (Methane)      | 0.0001     | 0.0001 | 0.00    |
| Comp Mole Frac (Acetylene)    | 0.0109     | 0.0109 | 0.00    |
| Comp Mole Frac (Ethylene)     | 0.609      | 0.6091 | 0.02    |
| Comp Mole Frac (Ethane)       | 0.1047     | 0.1047 | 0.00    |
| Comp Mole Frac (Propadiene)   | 0.0081     | 0.0081 | 0.00    |
| Comp Mole Frac (Propene)      | 0.1958     | 0.1958 | 0.00    |
| Comp Mole Frac (Propane)      | 0.0059     | 0.0059 | 0.00    |
| Comp Mole Frac (13-Butadiene) | 0.0214     | 0.0214 | 0.00    |
| Comp Mole Frac (1-Butene)     | 0.0305     | 0.0305 | 0.00    |
| Comp Mole Frac (n-Butane)     | 0.0096     | 0.0096 | 0.00    |
| Comp Mole Frac (i-Pentane)    | 0.0035     | 0.0035 | 0.00    |
| Comp Mole Frac (1-Hexyne)     | 0.0001     | 0.0001 | 0.00    |
| Comp Mole Frac (n-Heptane)    | 0          | 0      | 0.00    |
| Comp Mole Frac (n-Octane)     | 0          | 0      | 0.00    |
| Comp Mole Frac (Benzene)      | 0.0004     | 0.0004 | 0.00    |
| Comp Mole Frac (Toluene)      | 0          | 0      | 0.00    |
| Comp Mole Frac (p-Xylene)     | 0          | 0      | 0.00    |
| Comp Mole Frac (E-Benzene)    | 0          | 0      | 0.00    |
| Comp Mole Frac (n-Nonane)     | 0          | 0      | 0.00    |
| Comp Mole Frac (Styrene)      | 0          | 0      | 0.00    |
| Comp Mole Frac (n-C11)        | 0          | 0      | 0.00    |
| Comp Mole Frac (n-Decane)     | 0          | 0      | 0.00    |
| Comp Mole Frac (H2O)          | 0          | 0      | 0.00    |
| Comp Mole Frac (Nitrogen)     | 0          | 0      | 0.00    |
|                               |            | 1.0001 |         |
|                               |            |        |         |
|                               | 4763       |        |         |
| Mass Flow (kg/h)              | 135671     | 135671 | 0.00    |
| Molar Flow (kgmole/h)         | 4103.67    | 4104.8 | 0.03    |
| Temperature (C)               | 5.4        | 5.4    | 0.00    |
| Pressure (kg/cm2_g)           | 22.47      | 22.47  | 0.00    |

# Simulation Report – ECC 860 KTA

## Working Stage 6

|                               | 4011       |        |         | 4012       |        |         | 4013       |        |         |
|-------------------------------|------------|--------|---------|------------|--------|---------|------------|--------|---------|
|                               | Simulation | Design | %-Error | Simulation | Design | %-Error | Simulation | Design | %-Error |
| Comp Mole Frac (Hydrogen)     | 0.9650     | 0.965  | 0.00    | 0.9650     | 0.965  | 0.00    | 0.0114     | 0.0114 | 0.00    |
| Comp Mole Frac (CO)           | 0.0000     |        | 0.00    | 0.0000     |        | 0.00    | 0.0000     |        | 0.00    |
| Comp Mole Frac (Methane)      | 0.0341     | 0.0341 | 0.00    | 0.0341     | 0.0341 | 0.00    | 0.0379     | 0.0379 | 0.00    |
| Comp Mole Frac (Acetylene)    | 0.0000     |        | 0.00    | 0.0000     |        | 0.00    | 0.0000     |        | 0.00    |
| Comp Mole Frac (Ethylene)     | 0.0000     |        | 0.00    | 0.0000     |        | 0.00    | 0.0047     | 0.0047 | 0.00    |
| Comp Mole Frac (Ethane)       | 0.0000     |        | 0.00    | 0.0000     |        | 0.00    | 0.9411     | 0.9411 | 0.00    |
| Comp Mole Frac (Propadiene)   | 0.0000     |        | 0.00    | 0.0000     |        | 0.00    | 0.0000     | 0      | 0.00    |
| Comp Mole Frac (Propene)      | 0.0000     |        | 0.00    | 0.0000     |        | 0.00    | 0.0048     | 0.0048 | 0.00    |
| Comp Mole Frac (Propane)      | 0.0000     |        | 0.00    | 0.0000     |        | 0.00    | 0.0000     | 0      | 0.00    |
| Comp Mole Frac (13-Butadiene) | 0.0000     |        | 0.00    | 0.0000     |        | 0.00    | 0.0000     |        | 0.00    |
| Comp Mole Frac (1-Butene)     | 0.0000     |        | 0.00    | 0.0000     |        | 0.00    | 0.0000     |        | 0.00    |
| Comp Mole Frac (n-Butane)     | 0.0000     |        | 0.00    | 0.0000     |        | 0.00    | 0.0000     |        | 0.00    |
| Comp Mole Frac (n-Pentane)    | 0.0000     |        | 0.00    | 0.0000     |        | 0.00    | 0.0000     |        | 0.00    |
| Comp Mole Frac (n-Hexane)     | 0.0000     |        | 0.00    | 0.0000     |        | 0.00    | 0.0000     |        | 0.00    |
| Comp Mole Frac (n-Heptane)    | 0.0000     |        | 0.00    | 0.0000     |        | 0.00    | 0.0000     |        | 0.00    |
| Comp Mole Frac (n-Octane)     | 0.0000     |        | 0.00    | 0.0000     |        | 0.00    | 0.0000     |        | 0.00    |
| Comp Mole Frac (Benzene)      | 0.0000     |        | 0.00    | 0.0000     |        | 0.00    | 0.0000     |        | 0.00    |
| Comp Mole Frac (Toluene)      | 0.0000     |        | 0.00    | 0.0000     |        | 0.00    | 0.0000     |        | 0.00    |
| Comp Mole Frac (p-Xylene)     | 0.0000     |        | 0.00    | 0.0000     |        | 0.00    | 0.0000     |        | 0.00    |
|                               | 0.0000     |        | 0.00    | 0.0000     |        | 0.00    | 0.0000     |        | 0.00    |
| Comp Mole Frac (Styrene)      | 0.0000     |        | 0.00    | 0.0000     |        | 0.00    | 0.0000     |        | 0.00    |
| Comp Mole Frac (H2O)          | 0.0000     |        | 0.00    | 0.0000     |        | 0.00    | 0.0000     |        | 0.00    |
| Comp Mole Frac (Nitrogen)     | 0.0009     | 0.0009 | 0.00    | 0.0009     | 0.0009 | 0.00    | 0.0001     | 0.0001 | 0.00    |
| Total                         |            | 1      |         |            | 1      |         |            | 1      |         |
|                               |            |        |         |            |        |         |            |        |         |
|                               | 4011       |        |         | 4012       |        |         | 4013       |        |         |
| Mass Flow (kg/h)              | 364        | 364    | 0.00    | 364        | 364    | 0.00    | 3798       | 3798   | 0.00    |
| Molar Flow (kgmole/h)         | 144.58     | 144.5  | 0.06    | 144.58     | 144.5  | 0.06    | 129.77     | 129.8  | 0.02    |
| Temperature (C)               | 16         | 16     | 0.00    | -132       | -132   | 0.00    | -129.7     | -129.7 | 0.00    |
| Pressure (kg/cm2_g)           | 31.07      | 31.07  | 0.00    | 30.71      | 30.71  | 0.00    | 7.29       | 7.29   | 0.00    |



# Simulation Report – ECC 860 KTA

## Working Stage 6

---

|                               | 4014       |        |         | 4015       |        |         | 4016       |        |         |
|-------------------------------|------------|--------|---------|------------|--------|---------|------------|--------|---------|
|                               | Simulation | Design | %-Error | Simulation | Design | %-Error | Simulation | Design | %-Error |
| Comp Mole Frac (Hydrogen)     | 0.9971     | 0.997  | 0.01    | 0.9971     | 0.997  | 0.01    | 0.0000     |        | 0.00    |
| Comp Mole Frac (CO)           | 0.0000     |        | 0.00    | 0.0000     |        | 0.00    | 0.0000     |        | 0.00    |
| Comp Mole Frac (Methane)      | 0.0000     |        | 0.00    | 0.0000     |        | 0.00    | 0.0000     |        | 0.00    |
| Comp Mole Frac (Acetylene)    | 0.0000     |        | 0.00    | 0.0000     |        | 0.00    | 0.0000     |        | 0.00    |
| Comp Mole Frac (Ethylene)     | 0.0000     |        | 0.00    | 0.0000     |        | 0.00    | 0.0050     | 0.005  | 0.00    |
| Comp Mole Frac (Ethane)       | 0.0020     | 0.002  | 0.00    | 0.0020     | 0.002  | 0.00    | 0.9899     | 0.9898 | 0.01    |
| Comp Mole Frac (Propadiene)   | 0.0000     |        | 0.00    | 0.0000     |        | 0.00    | 0.0000     |        | 0.00    |
| Comp Mole Frac (Propene)      | 0.0000     |        | 0.00    | 0.0000     |        | 0.00    | 0.0050     | 0.005  | 0.00    |
| Comp Mole Frac (Propane)      | 0.0000     |        | 0.00    | 0.0000     |        | 0.00    | 0.0000     |        | 0.00    |
| Comp Mole Frac (13-Butadiene) | 0.0000     |        | 0.00    | 0.0000     |        | 0.00    | 0.0000     |        | 0.00    |
| Comp Mole Frac (1-Butene)     | 0.0000     |        | 0.00    | 0.0000     |        | 0.00    | 0.0000     |        | 0.00    |
| Comp Mole Frac (n-Butane)     | 0.0000     |        | 0.00    | 0.0000     |        | 0.00    | 0.0000     |        | 0.00    |
| Comp Mole Frac (n-Pentane)    | 0.0000     |        | 0.00    | 0.0000     |        | 0.00    | 0.0000     |        | 0.00    |
| Comp Mole Frac (n-Hexane)     | 0.0000     |        | 0.00    | 0.0000     |        | 0.00    | 0.0000     |        | 0.00    |
| Comp Mole Frac (n-Heptane)    | 0.0000     |        | 0.00    | 0.0000     |        | 0.00    | 0.0000     |        | 0.00    |
| Comp Mole Frac (n-Octane)     | 0.0000     |        | 0.00    | 0.0000     |        | 0.00    | 0.0000     |        | 0.00    |
| Comp Mole Frac (Benzene)      | 0.0000     |        | 0.00    | 0.0000     |        | 0.00    | 0.0000     |        | 0.00    |
| Comp Mole Frac (Toluene)      | 0.0000     |        | 0.00    | 0.0000     |        | 0.00    | 0.0000     |        | 0.00    |
| Comp Mole Frac (p-Xylene)     | 0.0000     |        | 0.00    | 0.0000     |        | 0.00    | 0.0000     |        | 0.00    |
|                               | 0.0000     |        | 0.00    | 0.0000     |        | 0.00    | 0.0000     |        | 0.00    |
| Comp Mole Frac (Styrene)      | 0.0000     |        | 0.00    | 0.0000     |        | 0.00    | 0.0000     |        | 0.00    |
| Comp Mole Frac (H2O)          | 0.0000     |        | 0.00    | 0.0000     |        | 0.00    | 0.0000     |        | 0.00    |
| Comp Mole Frac (Nitrogen)     | 0.0009     | 0.0009 | 0.00    | 0.0009     | 0.0009 | 0.00    | 0.0001     | 0.0001 | 0.00    |
| Total                         |            | 0.9999 |         |            | 0.9999 |         |            | 0.9999 |         |
|                               |            |        |         |            |        |         |            |        |         |
|                               | 4014       |        |         | 4015       |        |         | 4016       |        |         |
| Mass Flow (kg/h)              | 290        | 290    | 0.00    | 290        | 290    | 0.00    | 3725       | 3725   | 0.00    |
| Molar Flow (kgmole/h)         | 138.39     | 138.3  | 0.07    | 138.39     | 138.3  | 0.07    | 123.67     | 123.7  | 0.02    |
| Temperature (C)               | -132.4     | -132.4 | 0.00    | 35         | 35     | 0.00    | -132       | -132   | 0.00    |
| Pressure (kg/cm2_g)           | 30.51      | 30.51  | 0.00    | 30.13      | 30.13  | 0.00    | 30.56      | 30.56  | 0.00    |

# Simulation Report – ECC 860 KTA

## Working Stage 6

|                               | 4097       |        |         | 4098       |        |         | 4102       |        |         |
|-------------------------------|------------|--------|---------|------------|--------|---------|------------|--------|---------|
|                               | Simulation | Design | %-Error | Simulation | Design | %-Error | Simulation | Design | %-Error |
| Comp Mole Frac (Hydrogen)     | 0.9971     | 0.997  | 0.01    | 0.9971     | 0.997  | 0.01    | 0.1797     | 0.1797 | 0.00    |
| Comp Mole Frac (CO)           | 0.0000     |        | 0.00    | 0.0000     |        | 0.00    | 0.0011     | 0.0011 | 0.00    |
| Comp Mole Frac (Methane)      | 0.0000     |        | 0.00    | 0.0000     |        | 0.00    | 0.2996     | 0.2996 | 0.00    |
| Comp Mole Frac (Acetylene)    | 0.0000     |        | 0.00    | 0.0000     |        | 0.00    | 0.0058     | 0.0058 | 0.00    |
| Comp Mole Frac (Ethylene)     | 0.0000     |        | 0.00    | 0.0000     |        | 0.00    | 0.3142     | 0.3142 | 0.00    |
| Comp Mole Frac (Ethane)       | 0.0020     | 0.002  | 0.00    | 0.0020     | 0.002  | 0.00    | 0.0549     | 0.0549 | 0.00    |
| Comp Mole Frac (Propadiene)   | 0.0000     |        | 0.00    | 0.0000     |        | 0.00    | 0.0042     | 0.0042 | 0.00    |
| Comp Mole Frac (Propene)      | 0.0000     |        | 0.00    | 0.0000     |        | 0.00    | 0.1027     | 0.1027 | 0.00    |
| Comp Mole Frac (Propane)      | 0.0000     |        | 0.00    | 0.0000     |        | 0.00    | 0.0031     | 0.0031 | 0.00    |
| Comp Mole Frac (13-Butadiene) | 0.0000     |        | 0.00    | 0.0000     |        | 0.00    | 0.0112     | 0.0112 | 0.00    |
| Comp Mole Frac (1-Butene)     | 0.0000     |        | 0.00    | 0.0000     |        | 0.00    | 0.0160     | 0.016  | 0.00    |
| Comp Mole Frac (n-Butane)     | 0.0000     |        | 0.00    | 0.0000     |        | 0.00    | 0.0051     | 0.0051 | 0.00    |
| Comp Mole Frac (n-Pentane)    | 0.0000     |        | 0.00    | 0.0000     |        | 0.00    | 0.0018     | 0.0018 | 0.00    |
| Comp Mole Frac (n-Hexane)     | 0.0000     |        | 0.00    | 0.0000     |        | 0.00    | 0.0000     |        | 0.00    |
| Comp Mole Frac (n-Heptane)    | 0.0000     |        | 0.00    | 0.0000     |        | 0.00    | 0.0000     |        | 0.00    |
| Comp Mole Frac (n-Octane)     | 0.0000     |        | 0.00    | 0.0000     |        | 0.00    | 0.0000     |        | 0.00    |
| Comp Mole Frac (Benzene)      | 0.0000     |        | 0.00    | 0.0000     |        | 0.00    | 0.0002     | 0.0002 | 0.00    |
| Comp Mole Frac (Toluene)      | 0.0000     |        | 0.00    | 0.0000     |        | 0.00    | 0.0000     |        | 0.00    |
| Comp Mole Frac (p-Xylene)     | 0.0000     |        | 0.00    | 0.0000     |        | 0.00    | 0.0000     |        | 0.00    |
|                               | 0.0000     |        | 0.00    | 0.0000     |        | 0.00    | 0.0000     |        | 0.00    |
| Comp Mole Frac (Styrene)      | 0.0000     |        | 0.00    | 0.0000     |        | 0.00    | 0.0000     |        | 0.00    |
| Comp Mole Frac (H2O)          | 0.0000     |        | 0.00    | 0.0000     |        | 0.00    | 0.0000     |        | 0.00    |
| Comp Mole Frac (Nitrogen)     | 0.0009     | 0.0009 | 0.00    | 0.0009     | 0.0009 | 0.00    | 0.0003     | 0.0003 | 0.00    |
| Total                         |            | 0.9999 |         |            | 0.9999 |         |            | 0.9999 |         |
|                               |            |        |         |            |        |         |            |        |         |
|                               | 4097       |        |         | 4098       |        |         | 4102       |        |         |
| Mass Flow (kg/h)              | 190        | 190    | 0.00    | 100        | 100    | 0.00    | 185000     | 185000 | 0.00    |
| Molar Flow (kgmole/h)         | 90.67      | 90.7   | 0.03    | 47.72      | 47.7   | 0.04    | 8259.42    | 8258.8 | 0.01    |
| Temperature (C)               | 35         | 35     | 0.00    | 35         | 35     | 0.00    | -18.2      | -18.2  | 0.00    |
| Pressure (kg/cm2_g)           | 30.13      | 30.13  | 0.00    | 30.13      | 30.13  | 0.00    | 36.2       | 36.2   | 0.00    |

# Simulation Report – ECC 860 KTA

## Working Stage 6

|                               | 4103       |        |         | 4104       |        |         | 4107       |        |         |
|-------------------------------|------------|--------|---------|------------|--------|---------|------------|--------|---------|
|                               | Simulation | Design | %-Error | Simulation | Design | %-Error | Simulation | Design | %-Error |
| Comp Mole Frac (Hydrogen)     | 0.1797     | 0.1797 | 0.00    | 0.1797     | 0.1797 | 0.00    | 0.1797     | 0.1797 | 0.00    |
| Comp Mole Frac (CO)           | 0.0011     | 0.0011 | 0.00    | 0.0011     | 0.0011 | 0.00    | 0.0011     | 0.0011 | 0.00    |
| Comp Mole Frac (Methane)      | 0.2996     | 0.2996 | 0.00    | 0.2996     | 0.2996 | 0.00    | 0.2996     | 0.2996 | 0.00    |
| Comp Mole Frac (Acetylene)    | 0.0058     | 0.0058 | 0.00    | 0.0058     | 0.0058 | 0.00    | 0.0058     | 0.0058 | 0.00    |
| Comp Mole Frac (Ethylene)     | 0.3142     | 0.3142 | 0.00    | 0.3142     | 0.3142 | 0.00    | 0.3142     | 0.3142 | 0.00    |
| Comp Mole Frac (Ethane)       | 0.0549     | 0.0549 | 0.00    | 0.0549     | 0.0549 | 0.00    | 0.0549     | 0.0549 | 0.00    |
| Comp Mole Frac (Propadiene)   | 0.0042     | 0.0042 | 0.00    | 0.0042     | 0.0042 | 0.00    | 0.0042     | 0.0042 | 0.00    |
| Comp Mole Frac (Propene)      | 0.1027     | 0.1027 | 0.00    | 0.1027     | 0.1027 | 0.00    | 0.1027     | 0.1027 | 0.00    |
| Comp Mole Frac (Propane)      | 0.0031     | 0.0031 | 0.00    | 0.0031     | 0.0031 | 0.00    | 0.0031     | 0.0031 | 0.00    |
| Comp Mole Frac (13-Butadiene) | 0.0112     | 0.0112 | 0.00    | 0.0112     | 0.0112 | 0.00    | 0.0112     | 0.0112 | 0.00    |
| Comp Mole Frac (1-Butene)     | 0.0160     | 0.016  | 0.00    | 0.0160     | 0.016  | 0.00    | 0.0160     | 0.016  | 0.00    |
| Comp Mole Frac (n-Butane)     | 0.0051     | 0.0051 | 0.00    | 0.0051     | 0.0051 | 0.00    | 0.0051     | 0.0051 | 0.00    |
| Comp Mole Frac (n-Pentane)    | 0.0018     | 0.0018 | 0.00    | 0.0018     | 0.0018 | 0.00    | 0.0018     | 0.0018 | 0.00    |
| Comp Mole Frac (n-Hexane)     | 0.0000     |        | 0.00    | 0.0000     |        | 0.00    | 0.0000     |        | 0.00    |
| Comp Mole Frac (n-Heptane)    | 0.0000     |        | 0.00    | 0.0000     |        | 0.00    | 0.0000     |        | 0.00    |
| Comp Mole Frac (n-Octane)     | 0.0000     |        | 0.00    | 0.0000     |        | 0.00    | 0.0000     |        | 0.00    |
| Comp Mole Frac (Benzene)      | 0.0002     | 0.0002 | 0.00    | 0.0002     | 0.0002 | 0.00    | 0.0002     | 0.0002 | 0.00    |
| Comp Mole Frac (Toluene)      | 0.0000     |        | 0.00    | 0.0000     |        | 0.00    | 0.0000     |        | 0.00    |
| Comp Mole Frac (p-Xylene)     | 0.0000     |        | 0.00    | 0.0000     |        | 0.00    | 0.0000     |        | 0.00    |
|                               | 0.0000     |        | 0.00    | 0.0000     |        | 0.00    | 0.0000     |        | 0.00    |
| Comp Mole Frac (Styrene)      | 0.0000     |        | 0.00    | 0.0000     |        | 0.00    | 0.0000     |        | 0.00    |
| Comp Mole Frac (H2O)          | 0.0000     |        | 0.00    | 0.0000     |        | 0.00    | 0.0000     |        | 0.00    |
| Comp Mole Frac (Nitrogen)     | 0.0003     | 0.0003 | 0.00    | 0.0003     | 0.0003 | 0.00    | 0.0003     | 0.0003 | 0.00    |
| Total                         |            | 0.9999 |         |            | 0.9999 |         |            | 0.9999 |         |
|                               |            |        |         |            |        |         |            |        |         |
|                               | 4103       |        |         | 4104       |        |         | 4107       |        |         |
| Mass Flow (kg/h)              | 185000     | 185000 | 0.00    | 185000     | 185000 | 0.00    | 184986.2   | 185000 | 0.01    |
| Molar Flow (kgmole/h)         | 8259.42    | 8258.8 | 0.01    | 8259.42    | 8258.8 | 0.01    | 8258.8     | 8258.8 | 0.00    |
| Temperature (C)               | -20.46     | -23.7  | -13.67  | -36.5      | -36.5  | 0.00    | -65.3      | -65.3  | 0.00    |
| Pressure (kg/cm2_g)           | 35.98      | 35.98  | 0.00    | 35.69      | 35.69  | 0.00    | 34.96      | 34.96  | 0.00    |

# Simulation Report – ECC 860 KTA

## Working Stage 6

|                               | 4108       |        |         | 4109       |        |         |            | 4110   |         |  |
|-------------------------------|------------|--------|---------|------------|--------|---------|------------|--------|---------|--|
|                               | Simulation | Design | %-Error | Simulation | Design | %-Error | Simulation | Design | %-Error |  |
| Comp Mole Frac (Hydrogen)     | 0.1797     | 0.1797 | 0.00    | 0.4703     | 0.4665 | 0.81    | 0.0097     | 0.0131 | 25.95   |  |
| Comp Mole Frac (CO)           | 0.0011     | 0.0011 | 0.00    | 0.0024     | 0.0024 | 0.00    | 0.0003     | 0.0004 | 25.00   |  |
| Comp Mole Frac (Methane)      | 0.2996     | 0.2996 | 0.00    | 0.4144     | 0.4167 | 0.55    | 0.2324     | 0.2316 | 0.35    |  |
| Comp Mole Frac (Acetylene)    | 0.0058     | 0.0058 | 0.00    | 0.0013     | 0.0017 | 23.53   | 0.0084     | 0.0081 | 3.70    |  |
| Comp Mole Frac (Ethylene)     | 0.3142     | 0.3142 | 0.00    | 0.0973     | 0.0981 | 0.82    | 0.4412     | 0.4397 | 0.34    |  |
| Comp Mole Frac (Ethane)       | 0.0549     | 0.0549 | 0.00    | 0.0099     | 0.0101 | 1.98    | 0.0812     | 0.081  | 0.30    |  |
| Comp Mole Frac (Propadiene)   | 0.0042     | 0.0042 | 0.00    | 0.0001     | 0.0001 | 0.00    | 0.0066     | 0.0066 | 0.00    |  |
| Comp Mole Frac (Propene)      | 0.1027     | 0.1027 | 0.00    | 0.0033     | 0.0036 | 8.33    | 0.1609     | 0.1603 | 0.37    |  |
| Comp Mole Frac (Propane)      | 0.0031     | 0.0031 | 0.00    | 0.0001     | 0.0001 | 0.00    | 0.0049     | 0.0048 | 2.08    |  |
| Comp Mole Frac (13-Butadiene) | 0.0112     | 0.0112 | 0.00    | 0.0000     | 0.0001 | 100.00  | 0.0177     | 0.0177 | 0.00    |  |
| Comp Mole Frac (1-Butene)     | 0.0160     | 0.016  | 0.00    | 0.0001     | 0.0001 | 0.00    | 0.0253     | 0.0253 | 0.00    |  |
| Comp Mole Frac (n-Butane)     | 0.0051     | 0.0051 | 0.00    | 0.0000     |        | 0.00    | 0.0081     | 0.008  | 1.25    |  |
| Comp Mole Frac (n-Pentane)    | 0.0018     | 0.0018 | 0.00    | 0.0000     |        | 0.00    | 0.0029     | 0.0029 | 0.00    |  |
| Comp Mole Frac (n-Hexane)     | 0.0000     |        | 0.00    | 0.0000     |        | 0.00    | 0.0000     | 0.0001 | 100.00  |  |
| Comp Mole Frac (n-Heptane)    | 0.0000     |        | 0.00    | 0.0000     |        | 0.00    | 0.0000     |        | 0.00    |  |
| Comp Mole Frac (n-Octane)     | 0.0000     |        | 0.00    | 0.0000     |        | 0.00    | 0.0000     |        | 0.00    |  |
| Comp Mole Frac (Benzene)      | 0.0002     | 0.0002 | 0.00    | 0.0000     |        | 0.00    | 0.0003     | 0.0003 | 0.00    |  |
| Comp Mole Frac (Toluene)      | 0.0000     |        | 0.00    | 0.0000     |        | 0.00    | 0.0000     |        | 0.00    |  |
| Comp Mole Frac (p-Xylene)     | 0.0000     |        | 0.00    | 0.0000     |        | 0.00    | 0.0000     |        | 0.00    |  |
|                               | 0.0000     |        | 0.00    | 0.0000     |        | 0.00    | 0.0000     |        | 0.00    |  |
| Comp Mole Frac (Styrene)      | 0.0000     |        | 0.00    | 0.0000     |        | 0.00    | 0.0000     |        | 0.00    |  |
| Comp Mole Frac (H2O)          | 0.0000     |        | 0.00    | 0.0000     |        | 0.00    | 0.0000     |        | 0.00    |  |
| Comp Mole Frac (Nitrogen)     | 0.0003     | 0.0003 | 0.00    | 0.0007     | 0.0006 | 16.67   | 0.0001     | 0.0001 | 0.00    |  |
| Total                         |            | 0.9999 |         |            | 1.0001 |         |            | 1      |         |  |
|                               |            |        |         |            |        |         |            |        |         |  |
|                               | 4108       |        |         | 4109       |        |         |            | 4110   |         |  |
| Mass Flow (kg/h)              | 184986.2   | 185000 | 0.01    | 33231.83   | 33301  | 0.21    | 151754.3   | 151699 | 0.04    |  |
| Molar Flow (kgmole/h)         | 8258.8     | 8258.8 | 0.00    | 3048.89    | 3033.4 | 0.51    | 5209.91    | 5225.4 | 0.30    |  |
| Temperature (C)               | -72        | -72    | 0.00    | -70.2      | -72.1  | -2.64   | -70.2      | -72.1  | -2.64   |  |
| Pressure (kg/cm2_g)           | 34.72      | 34.72  | 0.00    | 34.55      | 34.55  | 0.00    | 34.55      | 34.55  | 0.00    |  |

# Simulation Report – ECC 860 KTA

## Working Stage 6

|                               | 4111       |        |         | 4112       |        |         | 4113       |        |         |
|-------------------------------|------------|--------|---------|------------|--------|---------|------------|--------|---------|
|                               | Simulation | Design | %-Error | Simulation | Design | %-Error | Simulation | Design | %-Error |
| Comp Mole Frac (Hydrogen)     | 0.4703     | 0.4665 | 0.81    | 0.4703     | 0.4665 | 0.81    | 0.5445     | 0.541  | 0.65    |
| Comp Mole Frac (CO)           | 0.0024     | 0.0024 | 0.00    | 0.0024     | 0.0024 | 0.00    | 0.0027     | 0.0026 | 3.85    |
| Comp Mole Frac (Methane)      | 0.4144     | 0.4167 | 0.55    | 0.4144     | 0.4167 | 0.55    | 0.4117     | 0.4125 | 0.19    |
| Comp Mole Frac (Acetylene)    | 0.0013     | 0.0017 | 23.53   | 0.0013     | 0.0017 | 23.53   | 0.0004     | 0.0007 | 42.86   |
| Comp Mole Frac (Ethylene)     | 0.0973     | 0.0981 | 0.82    | 0.0973     | 0.0981 | 0.82    | 0.0375     | 0.0399 | 6.02    |
| Comp Mole Frac (Ethane)       | 0.0099     | 0.0101 | 1.98    | 0.0099     | 0.0101 | 1.98    | 0.0024     | 0.0025 | 4.00    |
| Comp Mole Frac (Propadiene)   | 0.0001     | 0.0001 | 0.00    | 0.0001     | 0.0001 | 0.00    | 0.0000     |        | 0.00    |
| Comp Mole Frac (Propene)      | 0.0033     | 0.0036 | 8.33    | 0.0033     | 0.0036 | 8.33    | 0.0001     | 0.0002 | 50.00   |
| Comp Mole Frac (Propane)      | 0.0001     | 0.0001 | 0.00    | 0.0001     | 0.0001 | 0.00    | 0.0000     |        | 0.00    |
| Comp Mole Frac (13-Butadiene) | 0.0000     | 0.0001 | 100.00  | 0.0000     | 0.0001 | 100.00  | 0.0000     |        | 0.00    |
| Comp Mole Frac (1-Butene)     | 0.0001     | 0.0001 | 0.00    | 0.0001     | 0.0001 | 0.00    | 0.0000     |        | 0.00    |
| Comp Mole Frac (n-Butane)     | 0.0000     |        | 0.00    | 0.0000     |        | 0.00    | 0.0000     |        | 0.00    |
| Comp Mole Frac (n-Pentane)    | 0.0000     |        | 0.00    | 0.0000     |        | 0.00    | 0.0000     |        | 0.00    |
| Comp Mole Frac (n-Hexane)     | 0.0000     |        | 0.00    | 0.0000     |        | 0.00    | 0.0000     |        | 0.00    |
| Comp Mole Frac (n-Heptane)    | 0.0000     |        | 0.00    | 0.0000     |        | 0.00    | 0.0000     |        | 0.00    |
| Comp Mole Frac (n-Octane)     | 0.0000     |        | 0.00    | 0.0000     |        | 0.00    | 0.0000     |        | 0.00    |
| Comp Mole Frac (Benzene)      | 0.0000     |        | 0.00    | 0.0000     |        | 0.00    | 0.0000     |        | 0.00    |
| Comp Mole Frac (Toluene)      | 0.0000     |        | 0.00    | 0.0000     |        | 0.00    | 0.0000     |        | 0.00    |
| Comp Mole Frac (p-Xylene)     | 0.0000     |        | 0.00    | 0.0000     |        | 0.00    | 0.0000     |        | 0.00    |
|                               | 0.0000     |        | 0.00    | 0.0000     |        | 0.00    | 0.0000     |        | 0.00    |
| Comp Mole Frac (Styrene)      | 0.0000     |        | 0.00    | 0.0000     |        | 0.00    | 0.0000     |        | 0.00    |
| Comp Mole Frac (H2O)          | 0.0000     |        | 0.00    | 0.0000     |        | 0.00    | 0.0000     |        | 0.00    |
| Comp Mole Frac (Nitrogen)     | 0.0007     | 0.0006 | 16.67   | 0.0007     | 0.0006 | 16.67   | 0.0008     | 0.0007 | 14.29   |
| Total                         |            | 1.0001 |         |            | 1.0001 |         |            | 1.0001 |         |
|                               |            |        |         |            |        |         |            |        |         |
|                               | 4111       |        |         | 4112       |        |         | 4113       |        |         |
| Mass Flow (kg/h)              | 33231.83   | 33301  | 0.21    | 33231.83   | 33301  | 0.21    | 22860.94   | 23449  | 2.51    |
| Molar Flow (kgmole/h)         | 3048.89    | 3033.4 | 0.51    | 3048.89    | 3033.4 | 0.51    | 2594.47    | 2599.7 | 0.20    |
| Temperature (C)               | -86        | -86    | 0.00    | -98        | -98    | 0.00    | -98.08     | -98.1  | -0.02   |
| Pressure (kg/cm2_g)           | 34.38      | 34.38  | 0.00    | 34.1       | 34.1   | 0.00    | 33.92      | 33.92  | 0.00    |

# Simulation Report – ECC 860 KTA

## Working Stage 6

|                               | 4114       |        |         | 4115       |        |         | 4116       |        |         |
|-------------------------------|------------|--------|---------|------------|--------|---------|------------|--------|---------|
|                               | Simulation | Design | %-Error | Simulation | Design | %-Error | Simulation | Design | %-Error |
| Comp Mole Frac (Hydrogen)     | 0.0123     | 0.02   | 38.50   | 0.5445     | 0.541  | 0.65    | 0.7687     | 0.7629 | 0.76    |
| Comp Mole Frac (CO)           | 0.0006     | 0.0007 | 14.29   | 0.0027     | 0.0026 | 3.85    | 0.0031     | 0.003  | 3.33    |
| Comp Mole Frac (Methane)      | 0.4316     | 0.4421 | 2.38    | 0.4117     | 0.4125 | 0.19    | 0.2259     | 0.2314 | 2.38    |
| Comp Mole Frac (Acetylene)    | 0.0073     | 0.0077 | 5.19    | 0.0004     | 0.0007 | 42.86   | 0.0000     | 0      | 0.00    |
| Comp Mole Frac (Ethylene)     | 0.4665     | 0.4471 | 4.34    | 0.0375     | 0.0399 | 6.02    | 0.0012     | 0.0018 | 33.33   |
| Comp Mole Frac (Ethane)       | 0.0566     | 0.0556 | 1.76    | 0.0024     | 0.0025 | 4.00    | 0.0000     | 0      | 0.00    |
| Comp Mole Frac (Propadiene)   | 0.0005     | 0.0005 | 0.00    | 0.0000     |        | 0.00    | 0.0000     |        | 0.00    |
| Comp Mole Frac (Propene)      | 0.0228     | 0.0242 | 5.79    | 0.0001     | 0.0002 | 50.00   | 0.0000     |        | 0.00    |
| Comp Mole Frac (Propane)      | 0.0006     | 0.0006 | 0.00    | 0.0000     |        | 0.00    | 0.0000     |        | 0.00    |
| Comp Mole Frac (13-Butadiene) | 0.0004     | 0.0005 | 20.00   | 0.0000     |        | 0.00    | 0.0000     |        | 0.00    |
| Comp Mole Frac (1-Butene)     | 0.0006     | 0.0007 | 14.29   | 0.0000     |        | 0.00    | 0.0000     |        | 0.00    |
| Comp Mole Frac (n-Butane)     | 0.0003     | 0.0002 | 50.00   | 0.0000     |        | 0.00    | 0.0000     |        | 0.00    |
| Comp Mole Frac (n-Pentane)    | 0.0000     |        | 0.00    | 0.0000     |        | 0.00    | 0.0000     |        | 0.00    |
| Comp Mole Frac (n-Hexane)     | 0.0000     |        | 0.00    | 0.0000     |        | 0.00    | 0.0000     |        | 0.00    |
| Comp Mole Frac (n-Heptane)    | 0.0000     |        | 0.00    | 0.0000     |        | 0.00    | 0.0000     |        | 0.00    |
| Comp Mole Frac (n-Octane)     | 0.0000     |        | 0.00    | 0.0000     |        | 0.00    | 0.0000     |        | 0.00    |
| Comp Mole Frac (Benzene)      | 0.0000     |        | 0.00    | 0.0000     |        | 0.00    | 0.0000     |        | 0.00    |
| Comp Mole Frac (Toluene)      | 0.0000     |        | 0.00    | 0.0000     |        | 0.00    | 0.0000     |        | 0.00    |
| Comp Mole Frac (p-Xylene)     | 0.0000     |        | 0.00    | 0.0000     |        | 0.00    | 0.0000     |        | 0.00    |
|                               | 0.0000     |        | 0.00    | 0.0000     |        | 0.00    | 0.0000     |        | 0.00    |
| Comp Mole Frac (Styrene)      | 0.0000     |        | 0.00    | 0.0000     |        | 0.00    | 0.0000     |        | 0.00    |
| Comp Mole Frac (H2O)          | 0.0000     |        | 0.00    | 0.0000     |        | 0.00    | 0.0000     |        | 0.00    |
| Comp Mole Frac (Nitrogen)     | 0.0001     | 0.0002 | 50.00   | 0.0008     | 0.0007 | 14.29   | 0.0010     | 0.0009 | 11.11   |
| Total                         |            | 1.0001 |         |            | 1.0001 |         |            | 1      |         |
|                               |            |        |         |            |        |         |            |        |         |
|                               | 4114       |        |         | 4115       |        |         | 4116       |        |         |
| Mass Flow (kg/h)              | 10370.89   | 9852   | 5.27    | 22860.94   | 23449  | 2.51    | 11940.01   | 9787   | 22.00   |
| Molar Flow (kgmole/h)         | 454.42     | 433.8  | 4.75    | 2594.47    | 2599.7 | 0.20    | 1973.25    | 1808.7 | 9.10    |
| Temperature (C)               | -98.08     | -98.1  | -0.02   | -127.59    | -132   | -3.34   | -127.63    | -132.1 | -3.38   |
| Pressure (kg/cm2_g)           | 33.92      | 33.92  | 0.00    | 33.74      | 33.74  | 0.00    | 33.56      | 33.56  | 0.00    |

# Simulation Report – ECC 860 KTA

## Working Stage 6

|                               | 4117       |        |         | 4118       |        |         | 4119       |        |         |
|-------------------------------|------------|--------|---------|------------|--------|---------|------------|--------|---------|
|                               | Simulation | Design | %-Error | Simulation | Design | %-Error | Simulation | Design | %-Error |
| Comp Mole Frac (Hydrogen)     | 0.0200     | 0.0335 | 40.30   | 0.7687     | 0.7629 | 0.76    | 0.8626     | 0.8569 | 0.67    |
| Comp Mole Frac (CO)           | 0.0017     | 0.0018 | 5.56    | 0.0031     | 0.003  | 3.33    | 0.0032     | 0.003  | 6.67    |
| Comp Mole Frac (Methane)      | 0.8462     | 0.8265 | 2.38    | 0.2259     | 0.2314 | 2.38    | 0.1331     | 0.1391 | 4.31    |
| Comp Mole Frac (Acetylene)    | 0.0013     | 0.0021 | 38.10   | 0.0000     | 0      | 0.00    | 0.0000     |        | 0.00    |
| Comp Mole Frac (Ethylene)     | 0.1224     | 0.1269 | 3.55    | 0.0012     | 0.0018 | 33.33   | 0.0000     | 0.0001 | 100.00  |
| Comp Mole Frac (Ethane)       | 0.0078     | 0.0081 | 3.70    | 0.0000     | 0      | 0.00    | 0.0000     |        | 0.00    |
| Comp Mole Frac (Propadiene)   | 0.0000     |        | 0.00    | 0.0000     |        | 0.00    | 0.0000     |        | 0.00    |
| Comp Mole Frac (Propene)      | 0.0004     | 0.0005 | 20.00   | 0.0000     |        | 0.00    | 0.0000     |        | 0.00    |
| Comp Mole Frac (Propane)      | 0.0000     |        | 0.00    | 0.0000     |        | 0.00    | 0.0000     |        | 0.00    |
| Comp Mole Frac (13-Butadiene) | 0.0000     |        | 0.00    | 0.0000     |        | 0.00    | 0.0000     |        | 0.00    |
| Comp Mole Frac (1-Butene)     | 0.0000     |        | 0.00    | 0.0000     |        | 0.00    | 0.0000     |        | 0.00    |
| Comp Mole Frac (n-Butane)     | 0.0000     |        | 0.00    | 0.0000     |        | 0.00    | 0.0000     |        | 0.00    |
| Comp Mole Frac (n-Pentane)    | 0.0000     |        | 0.00    | 0.0000     |        | 0.00    | 0.0000     |        | 0.00    |
| Comp Mole Frac (n-Hexane)     | 0.0000     |        | 0.00    | 0.0000     |        | 0.00    | 0.0000     |        | 0.00    |
| Comp Mole Frac (n-Heptane)    | 0.0000     |        | 0.00    | 0.0000     |        | 0.00    | 0.0000     |        | 0.00    |
| Comp Mole Frac (n-Octane)     | 0.0000     |        | 0.00    | 0.0000     |        | 0.00    | 0.0000     |        | 0.00    |
| Comp Mole Frac (Benzene)      | 0.0000     |        | 0.00    | 0.0000     |        | 0.00    | 0.0000     |        | 0.00    |
| Comp Mole Frac (Toluene)      | 0.0000     |        | 0.00    | 0.0000     |        | 0.00    | 0.0000     |        | 0.00    |
| Comp Mole Frac (p-Xylene)     | 0.0000     |        | 0.00    | 0.0000     |        | 0.00    | 0.0000     |        | 0.00    |
|                               | 0.0000     |        | 0.00    | 0.0000     |        | 0.00    | 0.0000     |        | 0.00    |
| Comp Mole Frac (Styrene)      | 0.0000     |        | 0.00    | 0.0000     |        | 0.00    | 0.0000     |        | 0.00    |
| Comp Mole Frac (H2O)          | 0.0000     |        | 0.00    | 0.0000     |        | 0.00    | 0.0000     |        | 0.00    |
| Comp Mole Frac (Nitrogen)     | 0.0004     | 0.0004 | 0.00    | 0.0010     | 0.0009 | 11.11   | 0.0010     | 0.0009 | 11.11   |
| Total                         |            | 0.9998 |         |            | 1      |         |            | 1      |         |
|                               |            |        |         |            |        |         |            |        |         |
|                               | 4117       |        |         | 4118       |        |         | 4119       |        |         |
| Mass Flow (kg/h)              | 10932.89   | 13662  | 19.98   | 11940.01   | 9787   | 22.00   | 6514.97    | 6520   | 0.08    |
| Molar Flow (kgmole/h)         | 621.96     | 791    | 21.37   | 1973.25    | 1808.7 | 9.10    | 1632.27    | 1601.3 | 1.93    |
| Temperature (C)               | -127.65    | -132.1 | -3.37   | -144.86    | -145   | -0.10   | -145.35    | -145   | -0.24   |
| Pressure (kg/cm2_g)           | 33.56      | 33.56  | 0.00    | 33.38      | 33.38  | 0.00    | 33.2       | 33.2   | 0.00    |

# Simulation Report – ECC 860 KTA

## Working Stage 6

---

|                               | 4120       |        |         | 4121       |        |         | 4122       |        |         |
|-------------------------------|------------|--------|---------|------------|--------|---------|------------|--------|---------|
|                               | Simulation | Design | %-Error | Simulation | Design | %-Error | Simulation | Design | %-Error |
| Comp Mole Frac (Hydrogen)     | 0.0227     | 0.0372 | 38.98   | 0.8626     | 0.8569 | 0.67    | 0.8626     | 0.8569 | 0.67    |
| Comp Mole Frac (CO)           | 0.0027     | 0.0029 | 6.90    | 0.0032     | 0.003  | 6.67    | 0.0032     | 0.003  | 6.67    |
| Comp Mole Frac (Methane)      | 0.9631     | 0.9435 | 2.08    | 0.1331     | 0.1391 | 4.31    | 0.1331     | 0.1391 | 4.31    |
| Comp Mole Frac (Acetylene)    | 0.0000     | 0.0004 | 100.00  | 0.0000     |        | 0.00    | 0.0000     |        | 0.00    |
| Comp Mole Frac (Ethylene)     | 0.0106     | 0.0151 | 29.80   | 0.0000     | 0.0001 | 100.00  | 0.0000     | 0.0001 | 100.00  |
| Comp Mole Frac (Ethane)       | 0.0003     | 0.0004 | 25.00   | 0.0000     |        | 0.00    | 0.0000     |        | 0.00    |
| Comp Mole Frac (Propadiene)   | 0.0000     |        | 0.00    | 0.0000     |        | 0.00    | 0.0000     |        | 0.00    |
| Comp Mole Frac (Propene)      | 0.0000     |        | 0.00    | 0.0000     |        | 0.00    | 0.0000     |        | 0.00    |
| Comp Mole Frac (Propane)      | 0.0000     |        | 0.00    | 0.0000     |        | 0.00    | 0.0000     |        | 0.00    |
| Comp Mole Frac (13-Butadiene) | 0.0000     |        | 0.00    | 0.0000     |        | 0.00    | 0.0000     |        | 0.00    |
| Comp Mole Frac (1-Butene)     | 0.0000     |        | 0.00    | 0.0000     |        | 0.00    | 0.0000     |        | 0.00    |
| Comp Mole Frac (n-Butane)     | 0.0000     |        | 0.00    | 0.0000     |        | 0.00    | 0.0000     |        | 0.00    |
| Comp Mole Frac (n-Pentane)    | 0.0000     |        | 0.00    | 0.0000     |        | 0.00    | 0.0000     |        | 0.00    |
| Comp Mole Frac (n-Hexane)     | 0.0000     |        | 0.00    | 0.0000     |        | 0.00    | 0.0000     |        | 0.00    |
| Comp Mole Frac (n-Heptane)    | 0.0000     |        | 0.00    | 0.0000     |        | 0.00    | 0.0000     |        | 0.00    |
| Comp Mole Frac (n-Octane)     | 0.0000     |        | 0.00    | 0.0000     |        | 0.00    | 0.0000     |        | 0.00    |
| Comp Mole Frac (Benzene)      | 0.0000     |        | 0.00    | 0.0000     |        | 0.00    | 0.0000     |        | 0.00    |
| Comp Mole Frac (Toluene)      | 0.0000     |        | 0.00    | 0.0000     |        | 0.00    | 0.0000     |        | 0.00    |
| Comp Mole Frac (p-Xylene)     | 0.0000     |        | 0.00    | 0.0000     |        | 0.00    | 0.0000     |        | 0.00    |
|                               | 0.0000     |        | 0.00    | 0.0000     |        | 0.00    | 0.0000     |        | 0.00    |
| Comp Mole Frac (Styrene)      | 0.0000     |        | 0.00    | 0.0000     |        | 0.00    | 0.0000     |        | 0.00    |
| Comp Mole Frac (H2O)          | 0.0000     |        | 0.00    | 0.0000     |        | 0.00    | 0.0000     |        | 0.00    |
| Comp Mole Frac (Nitrogen)     | 0.0006     | 0.0006 | 0.00    | 0.0010     | 0.0009 | 11.11   | 0.0010     | 0.0009 | 11.11   |
| Total                         |            | 1.0001 |         |            | 1      |         |            | 1      |         |
|                               |            |        |         |            |        |         |            |        |         |
|                               | 4120       |        |         | 4121       |        |         | 4122       |        |         |
| Mass Flow (kg/h)              | 5425.04    | 3267   | 66.06   | 245.47     | 250    | 1.81    | 245.47     | 250    | 1.81    |
| Molar Flow (kgmole/h)         | 340.99     | 207.4  | 64.41   | 61.5       | 61.5   | 0.00    | 61.5       | 61.5   | 0.00    |
| Temperature (C)               | -145.35    | -145   | -0.24   | -145.35    | -145   | -0.24   | -149.83    | -150.3 | -0.31   |
| Pressure (kg/cm2_g)           | 33.2       | 33.2   | 0.00    | 33.2       | 33.2   | 0.00    | 5.58       | 5.58   | 0.00    |



# Simulation Report – ECC 860 KTA

## Working Stage 6

|                               | 4123       |        |         | 4124       |        |         | 4125       |        |         |
|-------------------------------|------------|--------|---------|------------|--------|---------|------------|--------|---------|
|                               | Simulation | Design | %-Error | Simulation | Design | %-Error | Simulation | Design | %-Error |
| Comp Mole Frac (Hydrogen)     | 0.8626     | 0.8569 | 0.67    | 0.8626     | 0.8569 | 0.67    | 0.9697     | 0.9652 | 0.47    |
| Comp Mole Frac (CO)           | 0.0032     | 0.003  | 6.67    | 0.0032     | 0.003  | 6.67    | 0.0028     | 0.0026 | 7.69    |
| Comp Mole Frac (Methane)      | 0.1331     | 0.1391 | 4.31    | 0.1331     | 0.1391 | 4.31    | 0.0265     | 0.0313 | 15.34   |
| Comp Mole Frac (Acetylene)    | 0.0000     |        | 0.00    | 0.0000     |        | 0.00    | 0.0000     |        | 0.00    |
| Comp Mole Frac (Ethylene)     | 0.0000     | 0.0001 | 100.00  | 0.0000     | 0.0001 | 100.00  | 0.0000     |        | 0.00    |
| Comp Mole Frac (Ethane)       | 0.0000     |        | 0.00    | 0.0000     |        | 0.00    | 0.0000     |        | 0.00    |
| Comp Mole Frac (Propadiene)   | 0.0000     |        | 0.00    | 0.0000     |        | 0.00    | 0.0000     |        | 0.00    |
| Comp Mole Frac (Propene)      | 0.0000     |        | 0.00    | 0.0000     |        | 0.00    | 0.0000     |        | 0.00    |
| Comp Mole Frac (Propane)      | 0.0000     |        | 0.00    | 0.0000     |        | 0.00    | 0.0000     |        | 0.00    |
| Comp Mole Frac (13-Butadiene) | 0.0000     |        | 0.00    | 0.0000     |        | 0.00    | 0.0000     |        | 0.00    |
| Comp Mole Frac (1-Butene)     | 0.0000     |        | 0.00    | 0.0000     |        | 0.00    | 0.0000     |        | 0.00    |
| Comp Mole Frac (n-Butane)     | 0.0000     |        | 0.00    | 0.0000     |        | 0.00    | 0.0000     |        | 0.00    |
| Comp Mole Frac (n-Pentane)    | 0.0000     |        | 0.00    | 0.0000     |        | 0.00    | 0.0000     |        | 0.00    |
| Comp Mole Frac (n-Hexane)     | 0.0000     |        | 0.00    | 0.0000     |        | 0.00    | 0.0000     |        | 0.00    |
| Comp Mole Frac (n-Heptane)    | 0.0000     |        | 0.00    | 0.0000     |        | 0.00    | 0.0000     |        | 0.00    |
| Comp Mole Frac (n-Octane)     | 0.0000     |        | 0.00    | 0.0000     |        | 0.00    | 0.0000     |        | 0.00    |
| Comp Mole Frac (Benzene)      | 0.0000     |        | 0.00    | 0.0000     |        | 0.00    | 0.0000     |        | 0.00    |
| Comp Mole Frac (Toluene)      | 0.0000     |        | 0.00    | 0.0000     |        | 0.00    | 0.0000     |        | 0.00    |
| Comp Mole Frac (p-Xylene)     | 0.0000     |        | 0.00    | 0.0000     |        | 0.00    | 0.0000     |        | 0.00    |
|                               | 0.0000     |        | 0.00    | 0.0000     |        | 0.00    | 0.0000     |        | 0.00    |
| Comp Mole Frac (Styrene)      | 0.0000     |        | 0.00    | 0.0000     |        | 0.00    | 0.0000     |        | 0.00    |
| Comp Mole Frac (H2O)          | 0.0000     |        | 0.00    | 0.0000     |        | 0.00    | 0.0000     |        | 0.00    |
| Comp Mole Frac (Nitrogen)     | 0.0010     | 0.0009 | 11.11   | 0.0010     | 0.0009 | 11.11   | 0.0010     | 0.0009 | 11.11   |
| Total                         |            | 1      |         |            | 1      |         |            | 1      |         |
|                               |            |        |         |            |        |         |            |        |         |
|                               | 4123       |        |         | 4124       |        |         | 4125       |        |         |
| Mass Flow (kg/h)              | 6269.5     | 6270   | 0.01    | 6269.5     | 6270   | 0.01    | 3467.2     | 3467   | 0.01    |
| Molar Flow (kgmole/h)         | 1570.77    | 1539.8 | 2.01    | 1570.77    | 1539.8 | 2.01    | 1394.45    | 1361.1 | 2.45    |
| Temperature (C)               | -145.35    | -145   | -0.24   | -168.4     | -167   | -0.84   | -168.42    | -167   | -0.85   |
| Pressure (kg/cm2_g)           | 33.2       | 33.2   | 0.00    | 33.02      | 33.02  | 0.00    | 32.83      | 32.83  | 0.00    |

# Simulation Report – ECC 860 KTA

## Working Stage 6

|                               | 4126       |        |         | 4127       |        |         | 4128       |        |         |
|-------------------------------|------------|--------|---------|------------|--------|---------|------------|--------|---------|
|                               | Simulation | Design | %-Error | Simulation | Design | %-Error | Simulation | Design | %-Error |
| Comp Mole Frac (Hydrogen)     | 0.0173     | 0.0321 | 46.11   | 0.9697     | 0.9652 | 0.47    | 0.9697     | 0.9652 | 0.47    |
| Comp Mole Frac (CO)           | 0.0062     | 0.006  | 3.33    | 0.0028     | 0.0026 | 7.69    | 0.0028     | 0.0026 | 7.69    |
| Comp Mole Frac (Methane)      | 0.9750     | 0.9602 | 1.54    | 0.0265     | 0.0313 | 15.34   | 0.0265     | 0.0313 | 15.34   |
| Comp Mole Frac (Acetylene)    | 0.0000     |        | 0.00    | 0.0000     |        | 0.00    | 0.0000     |        | 0.00    |
| Comp Mole Frac (Ethylene)     | 0.0003     | 0.0006 | 50.00   | 0.0000     |        | 0.00    | 0.0000     |        | 0.00    |
| Comp Mole Frac (Ethane)       | 0.0000     |        | 0.00    | 0.0000     |        | 0.00    | 0.0000     |        | 0.00    |
| Comp Mole Frac (Propadiene)   | 0.0000     |        | 0.00    | 0.0000     |        | 0.00    | 0.0000     |        | 0.00    |
| Comp Mole Frac (Propene)      | 0.0000     |        | 0.00    | 0.0000     |        | 0.00    | 0.0000     |        | 0.00    |
| Comp Mole Frac (Propane)      | 0.0000     |        | 0.00    | 0.0000     |        | 0.00    | 0.0000     |        | 0.00    |
| Comp Mole Frac (13-Butadiene) | 0.0000     |        | 0.00    | 0.0000     |        | 0.00    | 0.0000     |        | 0.00    |
| Comp Mole Frac (1-Butene)     | 0.0000     |        | 0.00    | 0.0000     |        | 0.00    | 0.0000     |        | 0.00    |
| Comp Mole Frac (n-Butane)     | 0.0000     |        | 0.00    | 0.0000     |        | 0.00    | 0.0000     |        | 0.00    |
| Comp Mole Frac (n-Pentane)    | 0.0000     |        | 0.00    | 0.0000     |        | 0.00    | 0.0000     |        | 0.00    |
| Comp Mole Frac (n-Hexane)     | 0.0000     |        | 0.00    | 0.0000     |        | 0.00    | 0.0000     |        | 0.00    |
| Comp Mole Frac (n-Heptane)    | 0.0000     |        | 0.00    | 0.0000     |        | 0.00    | 0.0000     |        | 0.00    |
| Comp Mole Frac (n-Octane)     | 0.0000     |        | 0.00    | 0.0000     |        | 0.00    | 0.0000     |        | 0.00    |
| Comp Mole Frac (Benzene)      | 0.0000     |        | 0.00    | 0.0000     |        | 0.00    | 0.0000     |        | 0.00    |
| Comp Mole Frac (Toluene)      | 0.0000     |        | 0.00    | 0.0000     |        | 0.00    | 0.0000     |        | 0.00    |
| Comp Mole Frac (p-Xylene)     | 0.0000     |        | 0.00    | 0.0000     |        | 0.00    | 0.0000     |        | 0.00    |
|                               | 0.0000     |        | 0.00    | 0.0000     |        | 0.00    | 0.0000     |        | 0.00    |
| Comp Mole Frac (Styrene)      | 0.0000     |        | 0.00    | 0.0000     |        | 0.00    | 0.0000     |        | 0.00    |
| Comp Mole Frac (H2O)          | 0.0000     |        | 0.00    | 0.0000     |        | 0.00    | 0.0000     |        | 0.00    |
| Comp Mole Frac (Nitrogen)     | 0.0013     | 0.001  | 30.00   | 0.0010     | 0.0009 | 11.11   | 0.0010     | 0.0009 | 11.11   |
| Total                         |            | 0.9999 |         |            | 1      |         |            | 1      |         |
|                               |            |        |         |            |        |         |            |        |         |
|                               | 4126       |        |         | 4127       |        |         | 4128       |        |         |
| Mass Flow (kg/h)              | 2802.3     | 2803   | 0.02    | 133.77     | 137    | 2.36    | 134        | 137    | 2.19    |
| Molar Flow (kgmole/h)         | 176.32     | 178.7  | 1.33    | 53.8       | 53.8   | 0.00    | 53.8       | 53.8   | 0.00    |
| Temperature (C)               | -168.42    | -167   | -0.85   | -168.42    | -167   | -0.85   | -172.35    | -171   | -0.79   |
| Pressure (kg/cm2_g)           | 32.83      | 32.83  | 0.00    | 32.83      | 32.83  | 0.00    | 0.95       | 0.95   | 0.00    |

# Simulation Report – ECC 860 KTA

## Working Stage 6

|                               | 4129       |        |         | 4130       |        |         | 4131       |        |         |
|-------------------------------|------------|--------|---------|------------|--------|---------|------------|--------|---------|
|                               | Simulation | Design | %-Error | Simulation | Design | %-Error | Simulation | Design | %-Error |
| Comp Mole Frac (Hydrogen)     | 0.9697     | 0.9652 | 0.47    | 0.0227     | 0.0372 | 38.98   | 0.2161     | 0.2246 | 3.78    |
| Comp Mole Frac (CO)           | 0.0028     | 0.0026 | 7.69    | 0.0027     | 0.0029 | 6.90    | 0.0028     | 0.0029 | 3.45    |
| Comp Mole Frac (Methane)      | 0.0265     | 0.0313 | 15.34   | 0.9631     | 0.9435 | 2.08    | 0.7719     | 0.7596 | 1.62    |
| Comp Mole Frac (Acetylene)    | 0.0000     |        | 0.00    | 0.0000     | 0.0004 | 100.00  | 0.0000     | 0.0003 | 100.00  |
| Comp Mole Frac (Ethylene)     | 0.0000     |        | 0.00    | 0.0106     | 0.0151 | 29.80   | 0.0082     | 0.0117 | 29.91   |
| Comp Mole Frac (Ethane)       | 0.0000     |        | 0.00    | 0.0003     | 0.0004 | 25.00   | 0.0002     | 0.0003 | 33.33   |
| Comp Mole Frac (Propadiene)   | 0.0000     |        | 0.00    | 0.0000     |        | 0.00    | 0.0000     |        | 0.00    |
| Comp Mole Frac (Propene)      | 0.0000     |        | 0.00    | 0.0000     |        | 0.00    | 0.0000     |        | 0.00    |
| Comp Mole Frac (Propane)      | 0.0000     |        | 0.00    | 0.0000     |        | 0.00    | 0.0000     |        | 0.00    |
| Comp Mole Frac (13-Butadiene) | 0.0000     |        | 0.00    | 0.0000     |        | 0.00    | 0.0000     |        | 0.00    |
| Comp Mole Frac (1-Butene)     | 0.0000     |        | 0.00    | 0.0000     |        | 0.00    | 0.0000     |        | 0.00    |
| Comp Mole Frac (n-Butane)     | 0.0000     |        | 0.00    | 0.0000     |        | 0.00    | 0.0000     |        | 0.00    |
| Comp Mole Frac (n-Pentane)    | 0.0000     |        | 0.00    | 0.0000     |        | 0.00    | 0.0000     |        | 0.00    |
| Comp Mole Frac (n-Hexane)     | 0.0000     |        | 0.00    | 0.0000     |        | 0.00    | 0.0000     |        | 0.00    |
| Comp Mole Frac (n-Heptane)    | 0.0000     |        | 0.00    | 0.0000     |        | 0.00    | 0.0000     |        | 0.00    |
| Comp Mole Frac (n-Octane)     | 0.0000     |        | 0.00    | 0.0000     |        | 0.00    | 0.0000     |        | 0.00    |
| Comp Mole Frac (Benzene)      | 0.0000     |        | 0.00    | 0.0000     |        | 0.00    | 0.0000     |        | 0.00    |
| Comp Mole Frac (Toluene)      | 0.0000     |        | 0.00    | 0.0000     |        | 0.00    | 0.0000     |        | 0.00    |
| Comp Mole Frac (p-Xylene)     | 0.0000     |        | 0.00    | 0.0000     |        | 0.00    | 0.0000     |        | 0.00    |
|                               | 0.0000     |        | 0.00    | 0.0000     |        | 0.00    | 0.0000     |        | 0.00    |
| Comp Mole Frac (Styrene)      | 0.0000     |        | 0.00    | 0.0000     |        | 0.00    | 0.0000     |        | 0.00    |
| Comp Mole Frac (H2O)          | 0.0000     |        | 0.00    | 0.0000     |        | 0.00    | 0.0000     |        | 0.00    |
| Comp Mole Frac (Nitrogen)     | 0.0010     | 0.0009 | 11.11   | 0.0006     | 0.0006 | 0.00    | 0.0007     | 0.0006 | 16.67   |
| Total                         |            | 1      |         |            | 1.0001 |         |            | 1      |         |
|                               |            |        |         |            |        |         |            |        |         |
|                               | 4129       |        |         | 4130       |        |         | 4131       |        |         |
| Mass Flow (kg/h)              | 3333.43    | 3330   | 0.10    | 5425.04    | 3267   | 66.06   | 5670.51    | 3517   | 61.23   |
| Molar Flow (kgmole/h)         | 1340.65    | 1307.4 | 2.54    | 340.99     | 207.4  | 64.41   | 402.49     | 268.9  | 49.68   |
| Temperature (C)               | -168.42    | -167   | -0.85   | -146.52    | -147.3 | -0.53   | -152.36    | -154   | -1.06   |
| Pressure (kg/cm2_g)           | 32.83      | 32.83  | 0.00    | 5.62       | 5.62   | 0.00    | 5.58       | 5.58   | 0.00    |

# Simulation Report – ECC 860 KTA

## Working Stage 6

|                               | 4132       |        |         | 4133       |        |         | 4134       |        |         |
|-------------------------------|------------|--------|---------|------------|--------|---------|------------|--------|---------|
|                               | Simulation | Design | %-Error | Simulation | Design | %-Error | Simulation | Design | %-Error |
| Comp Mole Frac (Hydrogen)     | 0.2161     | 0.2246 | 3.78    | 0.0173     | 0.0321 | 46.11   | 0.2396     | 0.2478 | 3.31    |
| Comp Mole Frac (CO)           | 0.0028     | 0.0029 | 3.45    | 0.0062     | 0.006  | 3.33    | 0.0054     | 0.0052 | 3.85    |
| Comp Mole Frac (Methane)      | 0.7719     | 0.7596 | 1.62    | 0.9750     | 0.9602 | 1.54    | 0.7535     | 0.7455 | 1.07    |
| Comp Mole Frac (Acetylene)    | 0.0000     | 0.0003 | 100.00  | 0.0000     |        | 0.00    | 0.0000     |        | 0.00    |
| Comp Mole Frac (Ethylene)     | 0.0082     | 0.0117 | 29.91   | 0.0003     | 0.0006 | 50.00   | 0.0002     | 0.0005 | 60.00   |
| Comp Mole Frac (Ethane)       | 0.0002     | 0.0003 | 33.33   | 0.0000     |        | 0.00    | 0.0000     |        | 0.00    |
| Comp Mole Frac (Propadiene)   | 0.0000     |        | 0.00    | 0.0000     |        | 0.00    | 0.0000     |        | 0.00    |
| Comp Mole Frac (Propene)      | 0.0000     |        | 0.00    | 0.0000     |        | 0.00    | 0.0000     |        | 0.00    |
| Comp Mole Frac (Propane)      | 0.0000     |        | 0.00    | 0.0000     |        | 0.00    | 0.0000     |        | 0.00    |
| Comp Mole Frac (13-Butadiene) | 0.0000     |        | 0.00    | 0.0000     |        | 0.00    | 0.0000     |        | 0.00    |
| Comp Mole Frac (1-Butene)     | 0.0000     |        | 0.00    | 0.0000     |        | 0.00    | 0.0000     |        | 0.00    |
| Comp Mole Frac (n-Butane)     | 0.0000     |        | 0.00    | 0.0000     |        | 0.00    | 0.0000     |        | 0.00    |
| Comp Mole Frac (n-Pentane)    | 0.0000     |        | 0.00    | 0.0000     |        | 0.00    | 0.0000     |        | 0.00    |
| Comp Mole Frac (n-Hexane)     | 0.0000     |        | 0.00    | 0.0000     |        | 0.00    | 0.0000     |        | 0.00    |
| Comp Mole Frac (n-Heptane)    | 0.0000     |        | 0.00    | 0.0000     |        | 0.00    | 0.0000     |        | 0.00    |
| Comp Mole Frac (n-Octane)     | 0.0000     |        | 0.00    | 0.0000     |        | 0.00    | 0.0000     |        | 0.00    |
| Comp Mole Frac (Benzene)      | 0.0000     |        | 0.00    | 0.0000     |        | 0.00    | 0.0000     |        | 0.00    |
| Comp Mole Frac (Toluene)      | 0.0000     |        | 0.00    | 0.0000     |        | 0.00    | 0.0000     |        | 0.00    |
| Comp Mole Frac (p-Xylene)     | 0.0000     |        | 0.00    | 0.0000     |        | 0.00    | 0.0000     |        | 0.00    |
|                               | 0.0000     |        | 0.00    | 0.0000     |        | 0.00    | 0.0000     |        | 0.00    |
| Comp Mole Frac (Styrene)      | 0.0000     |        | 0.00    | 0.0000     |        | 0.00    | 0.0000     |        | 0.00    |
| Comp Mole Frac (H2O)          | 0.0000     |        | 0.00    | 0.0000     |        | 0.00    | 0.0000     |        | 0.00    |
| Comp Mole Frac (Nitrogen)     | 0.0007     | 0.0006 | 16.67   | 0.0013     | 0.001  | 30.00   | 0.0012     | 0.001  | 20.00   |
| Total                         |            | 1      |         |            | 0.9999 |         |            | 1      |         |
|                               |            |        |         |            |        |         |            |        |         |
|                               | 4132       |        |         | 4133       |        |         | 4134       |        |         |
| Mass Flow (kg/h)              | 5670.51    | 3517   | 61.23   | 2802.3     | 2803   | 0.02    | 2936.07    | 2940   | 0.13    |
| Molar Flow (kgmole/h)         | 402.49     | 268.9  | 49.68   | 176.32     | 178.7  | 1.33    | 230.12     | 232.5  | 1.02    |
| Temperature (C)               | -135       | -135.4 | -0.30   | -168.01    | -167.5 | -0.30   | -174.46    | -174.2 | -0.15   |
| Pressure (kg/cm2_g)           | 5.48       | 5.48   | 0.00    | 0.99       | 0.99   | 0.00    | 0.95       | 0.95   | 0.00    |

# Simulation Report – ECC 860 KTA

## Working Stage 6

---

|                               | 4135       |        |         | 4136       |        |         | 4137       |        |         |
|-------------------------------|------------|--------|---------|------------|--------|---------|------------|--------|---------|
|                               | Simulation | Design | %-Error | Simulation | Design | %-Error | Simulation | Design | %-Error |
| Comp Mole Frac (Hydrogen)     | 0.0710     | 0.0721 | 1.53    | 0.0710     | 0.0721 | 1.53    | 0.0710     | 0.0721 | 1.53    |
| Comp Mole Frac (CO)           | 0.0020     | 0.002  | 0.00    | 0.0020     | 0.002  | 0.00    | 0.0020     | 0.002  | 0.00    |
| Comp Mole Frac (Methane)      | 0.9222     | 0.9208 | 0.15    | 0.9222     | 0.9208 | 0.15    | 0.9222     | 0.9208 | 0.15    |
| Comp Mole Frac (Acetylene)    | 0.0001     | 0.0001 | 0.00    | 0.0001     | 0.0001 | 0.00    | 0.0001     | 0.0001 | 0.00    |
| Comp Mole Frac (Ethylene)     | 0.0042     | 0.0046 | 8.70    | 0.0042     | 0.0046 | 8.70    | 0.0042     | 0.0046 | 8.70    |
| Comp Mole Frac (Ethane)       | 0.0000     |        | 0.00    | 0.0000     |        | 0.00    | 0.0000     |        | 0.00    |
| Comp Mole Frac (Propadiene)   | 0.0000     |        | 0.00    | 0.0000     |        | 0.00    | 0.0000     |        | 0.00    |
| Comp Mole Frac (Propene)      | 0.0000     |        | 0.00    | 0.0000     |        | 0.00    | 0.0000     |        | 0.00    |
| Comp Mole Frac (Propane)      | 0.0000     |        | 0.00    | 0.0000     |        | 0.00    | 0.0000     |        | 0.00    |
| Comp Mole Frac (13-Butadiene) | 0.0000     |        | 0.00    | 0.0000     |        | 0.00    | 0.0000     |        | 0.00    |
| Comp Mole Frac (1-Butene)     | 0.0000     |        | 0.00    | 0.0000     |        | 0.00    | 0.0000     |        | 0.00    |
| Comp Mole Frac (n-Butane)     | 0.0000     |        | 0.00    | 0.0000     |        | 0.00    | 0.0000     |        | 0.00    |
| Comp Mole Frac (n-Pentane)    | 0.0000     |        | 0.00    | 0.0000     |        | 0.00    | 0.0000     |        | 0.00    |
| Comp Mole Frac (n-Hexane)     | 0.0000     |        | 0.00    | 0.0000     |        | 0.00    | 0.0000     |        | 0.00    |
| Comp Mole Frac (n-Heptane)    | 0.0000     |        | 0.00    | 0.0000     |        | 0.00    | 0.0000     |        | 0.00    |
| Comp Mole Frac (n-Octane)     | 0.0000     |        | 0.00    | 0.0000     |        | 0.00    | 0.0000     |        | 0.00    |
| Comp Mole Frac (Benzene)      | 0.0000     |        | 0.00    | 0.0000     |        | 0.00    | 0.0000     |        | 0.00    |
| Comp Mole Frac (Toluene)      | 0.0000     |        | 0.00    | 0.0000     |        | 0.00    | 0.0000     |        | 0.00    |
| Comp Mole Frac (p-Xylene)     | 0.0000     |        | 0.00    | 0.0000     |        | 0.00    | 0.0000     |        | 0.00    |
|                               | 0.0000     |        | 0.00    | 0.0000     |        | 0.00    | 0.0000     |        | 0.00    |
| Comp Mole Frac (Styrene)      | 0.0000     |        | 0.00    | 0.0000     |        | 0.00    | 0.0000     |        | 0.00    |
| Comp Mole Frac (H2O)          | 0.0000     |        | 0.00    | 0.0000     |        | 0.00    | 0.0000     |        | 0.00    |
| Comp Mole Frac (Nitrogen)     | 0.0004     | 0.0004 | 0.00    | 0.0004     | 0.0004 | 0.00    | 0.0004     | 0.0004 | 0.00    |
| Total                         |            | 1      |         |            | 1      |         |            | 1      |         |
|                               |            |        |         |            |        |         |            |        |         |
|                               | 4135       |        |         | 4136       |        |         | 4137       |        |         |
| Mass Flow (kg/h)              | 38020.51   | 35867  | 6.00    | 38020.51   | 35867  | 6.00    | 28052.76   | 27954  | 0.35    |
| Molar Flow (kgmole/h)         | 2506.12    | 2372.5 | 5.63    | 2506.12    | 2372.5 | 5.63    | 1849.1     | 1849.1 | 0.00    |
| Temperature (C)               | -135.17    | -135.3 | -0.10   | 35         | 35     | 0.00    | 35         | 35     | 0.00    |
| Pressure (kg/cm2_g)           | 5.46       | 5.46   | 0.00    | 5.24       | 5.24   | 0.00    | 5.24       | 4.5    | 16.44   |

# Simulation Report – ECC 860 KTA

## Working Stage 6

|                               | 4138       |        |         | 4139       |        |         | 4140       |        |         |
|-------------------------------|------------|--------|---------|------------|--------|---------|------------|--------|---------|
|                               | Simulation | Design | %-Error | Simulation | Design | %-Error | Simulation | Design | %-Error |
| Comp Mole Frac (Hydrogen)     | 0.2396     | 0.2478 | 3.31    | 0.9697     | 0.9652 | 0.47    | 0.0097     | 0.0131 | 25.95   |
| Comp Mole Frac (CO)           | 0.0054     | 0.0052 | 3.85    | 0.0028     | 0.0026 | 7.69    | 0.0003     | 0.0004 | 25.00   |
| Comp Mole Frac (Methane)      | 0.7535     | 0.7455 | 1.07    | 0.0265     | 0.0313 | 15.34   | 0.2324     | 0.2316 | 0.35    |
| Comp Mole Frac (Acetylene)    | 0.0000     |        | 0.00    | 0.0000     |        | 0.00    | 0.0084     | 0.0081 | 3.70    |
| Comp Mole Frac (Ethylene)     | 0.0002     | 0.0005 | 60.00   | 0.0000     |        | 0.00    | 0.4412     | 0.4397 | 0.34    |
| Comp Mole Frac (Ethane)       | 0.0000     |        | 0.00    | 0.0000     |        | 0.00    | 0.0812     | 0.081  | 0.30    |
| Comp Mole Frac (Propadiene)   | 0.0000     |        | 0.00    | 0.0000     |        | 0.00    | 0.0066     | 0.0066 | 0.00    |
| Comp Mole Frac (Propene)      | 0.0000     |        | 0.00    | 0.0000     |        | 0.00    | 0.1609     | 0.1603 | 0.37    |
| Comp Mole Frac (Propane)      | 0.0000     |        | 0.00    | 0.0000     |        | 0.00    | 0.0049     | 0.0048 | 2.08    |
| Comp Mole Frac (13-Butadiene) | 0.0000     |        | 0.00    | 0.0000     |        | 0.00    | 0.0177     | 0.0177 | 0.00    |
| Comp Mole Frac (1-Butene)     | 0.0000     |        | 0.00    | 0.0000     |        | 0.00    | 0.0253     | 0.0253 | 0.00    |
| Comp Mole Frac (n-Butane)     | 0.0000     |        | 0.00    | 0.0000     |        | 0.00    | 0.0081     | 0.008  | 1.25    |
| Comp Mole Frac (n-Pentane)    | 0.0000     |        | 0.00    | 0.0000     |        | 0.00    | 0.0029     | 0.0029 | 0.00    |
| Comp Mole Frac (n-Hexane)     | 0.0000     |        | 0.00    | 0.0000     |        | 0.00    | 0.0000     | 0.0001 | 100.00  |
| Comp Mole Frac (n-Heptane)    | 0.0000     |        | 0.00    | 0.0000     |        | 0.00    | 0.0000     |        | 0.00    |
| Comp Mole Frac (n-Octane)     | 0.0000     |        | 0.00    | 0.0000     |        | 0.00    | 0.0000     |        | 0.00    |
| Comp Mole Frac (Benzene)      | 0.0000     |        | 0.00    | 0.0000     |        | 0.00    | 0.0003     | 0.0003 | 0.00    |
| Comp Mole Frac (Toluene)      | 0.0000     |        | 0.00    | 0.0000     |        | 0.00    | 0.0000     |        | 0.00    |
| Comp Mole Frac (p-Xylene)     | 0.0000     |        | 0.00    | 0.0000     |        | 0.00    | 0.0000     |        | 0.00    |
|                               | 0.0000     |        | 0.00    | 0.0000     |        | 0.00    | 0.0000     |        | 0.00    |
| Comp Mole Frac (Styrene)      | 0.0000     |        | 0.00    | 0.0000     |        | 0.00    | 0.0000     |        | 0.00    |
| Comp Mole Frac (H2O)          | 0.0000     |        | 0.00    | 0.0000     |        | 0.00    | 0.0000     |        | 0.00    |
| Comp Mole Frac (Nitrogen)     | 0.0012     | 0.001  | 20.00   | 0.0010     | 0.0009 | 11.11   | 0.0001     | 0.0001 | 0.00    |
| Total                         |            | 1      |         |            | 1      |         |            | 1      |         |
|                               |            |        |         |            |        |         |            |        |         |
|                               | 4138       |        |         | 4139       |        |         | 4140       |        |         |
| Mass Flow (kg/h)              | 2936.07    | 2940   | 0.13    | 3317.26    | 3313   | 0.13    | 75877.17   | 75849  | 0.04    |
| Molar Flow (kgmole/h)         | 230.12     | 232.5  | 1.02    | 1334.15    | 1300.8 | 2.56    | 2604.96    | 2612.7 | 0.30    |
| Temperature (C)               | 35         | 35     | 0.00    | 35         | 35     | 0.00    | -99        | -97.4  | -1.64   |
| Pressure (kg/cm2_g)           | 0.39       | 0.39   | 0.00    | 32.22      | 32.22  | 0.00    | 34.07      | 34.07  | 0.00    |

# Simulation Report – ECC 860 KTA

## Working Stage 6

|                               | 4141       |        |         | 4142       |        |         | 4143       |        |         |
|-------------------------------|------------|--------|---------|------------|--------|---------|------------|--------|---------|
|                               | Simulation | Design | %-Error | Simulation | Design | %-Error | Simulation | Design | %-Error |
| Comp Mole Frac (Hydrogen)     | 0.0097     | 0.0131 | 25.95   | 0.0097     | 0.0131 | 25.95   | 0.0123     | 0.02   | 38.50   |
| Comp Mole Frac (CO)           | 0.0003     | 0.0004 | 25.00   | 0.0003     | 0.0004 | 25.00   | 0.0006     | 0.0007 | 14.29   |
| Comp Mole Frac (Methane)      | 0.2324     | 0.2316 | 0.35    | 0.2324     | 0.2316 | 0.35    | 0.4316     | 0.4421 | 2.38    |
| Comp Mole Frac (Acetylene)    | 0.0084     | 0.0081 | 3.70    | 0.0084     | 0.0081 | 3.70    | 0.0073     | 0.0077 | 5.19    |
| Comp Mole Frac (Ethylene)     | 0.4412     | 0.4397 | 0.34    | 0.4412     | 0.4397 | 0.34    | 0.4665     | 0.4471 | 4.34    |
| Comp Mole Frac (Ethane)       | 0.0812     | 0.081  | 0.30    | 0.0812     | 0.081  | 0.30    | 0.0566     | 0.0556 | 1.76    |
| Comp Mole Frac (Propadiene)   | 0.0066     | 0.0066 | 0.00    | 0.0066     | 0.0066 | 0.00    | 0.0005     | 0.0005 | 0.00    |
| Comp Mole Frac (Propene)      | 0.1609     | 0.1603 | 0.37    | 0.1609     | 0.1603 | 0.37    | 0.0228     | 0.0242 | 5.79    |
| Comp Mole Frac (Propane)      | 0.0049     | 0.0048 | 2.08    | 0.0049     | 0.0048 | 2.08    | 0.0006     | 0.0006 | 0.00    |
| Comp Mole Frac (13-Butadiene) | 0.0177     | 0.0177 | 0.00    | 0.0177     | 0.0177 | 0.00    | 0.0004     | 0.0005 | 20.00   |
| Comp Mole Frac (1-Butene)     | 0.0253     | 0.0253 | 0.00    | 0.0253     | 0.0253 | 0.00    | 0.0006     | 0.0007 | 14.29   |
| Comp Mole Frac (n-Butane)     | 0.0081     | 0.008  | 1.25    | 0.0081     | 0.008  | 1.25    | 0.0003     | 0.0002 | 50.00   |
| Comp Mole Frac (n-Pentane)    | 0.0029     | 0.0029 | 0.00    | 0.0029     | 0.0029 | 0.00    | 0.0000     |        | 0.00    |
| Comp Mole Frac (n-Hexane)     | 0.0000     | 0.0001 | 100.00  | 0.0000     | 0.0001 | 100.00  | 0.0000     |        | 0.00    |
| Comp Mole Frac (n-Heptane)    | 0.0000     |        | 0.00    | 0.0000     |        | 0.00    | 0.0000     |        | 0.00    |
| Comp Mole Frac (n-Octane)     | 0.0000     |        | 0.00    | 0.0000     |        | 0.00    | 0.0000     |        | 0.00    |
| Comp Mole Frac (Benzene)      | 0.0003     | 0.0003 | 0.00    | 0.0003     | 0.0003 | 0.00    | 0.0000     |        | 0.00    |
| Comp Mole Frac (Toluene)      | 0.0000     |        | 0.00    | 0.0000     |        | 0.00    | 0.0000     |        | 0.00    |
| Comp Mole Frac (p-Xylene)     | 0.0000     |        | 0.00    | 0.0000     |        | 0.00    | 0.0000     |        | 0.00    |
|                               | 0.0000     |        | 0.00    | 0.0000     |        | 0.00    | 0.0000     |        | 0.00    |
| Comp Mole Frac (Styrene)      | 0.0000     |        | 0.00    | 0.0000     |        | 0.00    | 0.0000     |        | 0.00    |
| Comp Mole Frac (H2O)          | 0.0000     |        | 0.00    | 0.0000     |        | 0.00    | 0.0000     |        | 0.00    |
| Comp Mole Frac (Nitrogen)     | 0.0001     | 0.0001 | 0.00    | 0.0001     | 0.0001 | 0.00    | 0.0001     | 0.0002 | 50.00   |
| Total                         |            | 1      |         |            | 1      |         |            | 1.0001 |         |
|                               |            |        |         |            |        |         |            |        |         |
|                               | 4141       |        |         | 4142       |        |         | 4143       |        |         |
| Mass Flow (kg/h)              | 75877.17   | 75849  | 0.04    | 75877.17   | 75849  | 0.04    | 10370.89   | 9852   | 5.27    |
| Molar Flow (kgmole/h)         | 2604.96    | 2612.7 | 0.30    | 2604.96    | 2612.7 | 0.30    | 454.42     | 433.8  | 4.75    |
| Temperature (C)               | -75.48     | -77.9  | -3.11   | -103.313   | -103.7 | -0.37   | -114.25    | -115.5 | -1.08   |
| Pressure (kg/cm2_g)           | 5.61       | 5.61   | 0.00    | 5.57       | 5.57   | 0.00    | 5.55       | 5.55   | 0.00    |

# Simulation Report – ECC 860 KTA

## Working Stage 6

|                               | 4144       |        |         | 4145       |        |         | 4146       |        |         |
|-------------------------------|------------|--------|---------|------------|--------|---------|------------|--------|---------|
|                               | Simulation | Design | %-Error | Simulation | Design | %-Error | Simulation | Design | %-Error |
| Comp Mole Frac (Hydrogen)     | 0.0200     | 0.0335 | 40.30   | 0.9697     | 0.9651 | 0.48    | 0.0027     | 0.0027 | 0.00    |
| Comp Mole Frac (CO)           | 0.0017     | 0.0018 | 5.56    | 0.0028     | 0.0026 | 7.69    | 0.0000     |        | 0.00    |
| Comp Mole Frac (Methane)      | 0.8462     | 0.8265 | 2.38    | 0.0265     | 0.0313 | 15.34   | 0.0088     | 0.0088 | 0.00    |
| Comp Mole Frac (Acetylene)    | 0.0013     | 0.0021 | 38.10   | 0.0000     |        | 0.00    | 0.0000     |        | 0.00    |
| Comp Mole Frac (Ethylene)     | 0.1224     | 0.1269 | 3.55    | 0.0000     |        | 0.00    | 0.0049     | 0.0049 | 0.00    |
| Comp Mole Frac (Ethane)       | 0.0078     | 0.0081 | 3.70    | 0.0000     |        | 0.00    | 0.9785     | 0.9785 | 0.00    |
| Comp Mole Frac (Propadiene)   | 0.0000     |        | 0.00    | 0.0000     |        | 0.00    | 0.0000     |        | 0.00    |
| Comp Mole Frac (Propene)      | 0.0004     | 0.0005 | 20.00   | 0.0000     |        | 0.00    | 0.0050     | 0.0049 | 2.04    |
| Comp Mole Frac (Propane)      | 0.0000     |        | 0.00    | 0.0000     |        | 0.00    | 0.0000     |        | 0.00    |
| Comp Mole Frac (13-Butadiene) | 0.0000     |        | 0.00    | 0.0000     |        | 0.00    | 0.0000     |        | 0.00    |
| Comp Mole Frac (1-Butene)     | 0.0000     |        | 0.00    | 0.0000     |        | 0.00    | 0.0000     |        | 0.00    |
| Comp Mole Frac (n-Butane)     | 0.0000     |        | 0.00    | 0.0000     |        | 0.00    | 0.0000     |        | 0.00    |
| Comp Mole Frac (n-Pentane)    | 0.0000     |        | 0.00    | 0.0000     |        | 0.00    | 0.0000     |        | 0.00    |
| Comp Mole Frac (n-Hexane)     | 0.0000     |        | 0.00    | 0.0000     |        | 0.00    | 0.0000     |        | 0.00    |
| Comp Mole Frac (n-Heptane)    | 0.0000     |        | 0.00    | 0.0000     |        | 0.00    | 0.0000     |        | 0.00    |
| Comp Mole Frac (n-Octane)     | 0.0000     |        | 0.00    | 0.0000     |        | 0.00    | 0.0000     |        | 0.00    |
| Comp Mole Frac (Benzene)      | 0.0000     |        | 0.00    | 0.0000     |        | 0.00    | 0.0000     |        | 0.00    |
| Comp Mole Frac (Toluene)      | 0.0000     |        | 0.00    | 0.0000     |        | 0.00    | 0.0000     |        | 0.00    |
| Comp Mole Frac (p-Xylene)     | 0.0000     |        | 0.00    | 0.0000     |        | 0.00    | 0.0000     |        | 0.00    |
|                               | 0.0000     |        | 0.00    | 0.0000     |        | 0.00    | 0.0000     |        | 0.00    |
| Comp Mole Frac (Styrene)      | 0.0000     |        | 0.00    | 0.0000     |        | 0.00    | 0.0000     |        | 0.00    |
| Comp Mole Frac (H2O)          | 0.0000     |        | 0.00    | 0.0000     |        | 0.00    | 0.0000     |        | 0.00    |
| Comp Mole Frac (Nitrogen)     | 0.0004     | 0.0004 | 0.00    | 0.0010     | 0.0009 | 11.11   | 0.0001     | 0.0001 | 0.00    |
| Total                         |            | 0.9998 |         |            | 0.9999 |         |            | 0.9999 |         |
|                               |            |        |         |            |        |         |            |        |         |
|                               | 4144       |        |         | 4145       |        |         | 4146       |        |         |
| Mass Flow (kg/h)              | 10932.89   | 13662  | 19.98   | 16.16      | 17     | 4.94    | 16682      | 16682  | 0.00    |
| Molar Flow (kgmole/h)         | 621.96     | 791    | 21.37   | 6.5        | 6.5    | 0.00    | 557.53     | 557.5  | 0.01    |
| Temperature (C)               | -135.01    | -138.3 | -2.38   | 35         | 35     | 0.00    | 35         | 35     | 0.00    |
| Pressure (kg/cm2_g)           | 5.53       | 5.53   | 0.00    | 32.22      | 32.22  | 0.00    | 6.61       | 6.61   | 0.00    |



# Simulation Report – ECC 860 KTA

## Working Stage 6

|                               | 4147       |        |         | 4148       |        |         | 4149       |        |         |
|-------------------------------|------------|--------|---------|------------|--------|---------|------------|--------|---------|
|                               | Simulation | Design | %-Error | Simulation | Design | %-Error | Simulation | Design | %-Error |
| Comp Mole Frac (Hydrogen)     | 0.0000     |        | 0.00    | 0.0000     |        | 0.00    | 0.0000     |        | 0.00    |
| Comp Mole Frac (CO)           | 0.0000     |        | 0.00    | 0.0000     |        | 0.00    | 0.0000     |        | 0.00    |
| Comp Mole Frac (Methane)      | 0.0001     | 0.0001 | 0.00    | 0.0001     | 0.0001 | 0.00    | 0.0001     | 0.0001 | 0.00    |
| Comp Mole Frac (Acetylene)    | 0.0000     |        | 0.00    | 0.0000     |        | 0.00    | 0.0000     |        | 0.00    |
| Comp Mole Frac (Ethylene)     | 0.9995     | 0.9995 | 0.00    | 0.9995     | 0.9995 | 0.00    | 0.9995     | 0.9995 | 0.00    |
| Comp Mole Frac (Ethane)       | 0.0004     | 0.0004 | 0.00    | 0.0004     | 0.0004 | 0.00    | 0.0004     | 0.0004 | 0.00    |
| Comp Mole Frac (Propadiene)   | 0.0000     |        | 0.00    | 0.0000     |        | 0.00    | 0.0000     |        | 0.00    |
| Comp Mole Frac (Propene)      | 0.0000     |        | 0.00    | 0.0000     |        | 0.00    | 0.0000     |        | 0.00    |
| Comp Mole Frac (Propane)      | 0.0000     |        | 0.00    | 0.0000     |        | 0.00    | 0.0000     |        | 0.00    |
| Comp Mole Frac (13-Butadiene) | 0.0000     |        | 0.00    | 0.0000     |        | 0.00    | 0.0000     |        | 0.00    |
| Comp Mole Frac (1-Butene)     | 0.0000     |        | 0.00    | 0.0000     |        | 0.00    | 0.0000     |        | 0.00    |
| Comp Mole Frac (n-Butane)     | 0.0000     |        | 0.00    | 0.0000     |        | 0.00    | 0.0000     |        | 0.00    |
| Comp Mole Frac (n-Pentane)    | 0.0000     |        | 0.00    | 0.0000     |        | 0.00    | 0.0000     |        | 0.00    |
| Comp Mole Frac (n-Hexane)     | 0.0000     |        | 0.00    | 0.0000     |        | 0.00    | 0.0000     |        | 0.00    |
| Comp Mole Frac (n-Heptane)    | 0.0000     |        | 0.00    | 0.0000     |        | 0.00    | 0.0000     |        | 0.00    |
| Comp Mole Frac (n-Octane)     | 0.0000     |        | 0.00    | 0.0000     |        | 0.00    | 0.0000     |        | 0.00    |
| Comp Mole Frac (Benzene)      | 0.0000     |        | 0.00    | 0.0000     |        | 0.00    | 0.0000     |        | 0.00    |
| Comp Mole Frac (Toluene)      | 0.0000     |        | 0.00    | 0.0000     |        | 0.00    | 0.0000     |        | 0.00    |
| Comp Mole Frac (p-Xylene)     | 0.0000     |        | 0.00    | 0.0000     |        | 0.00    | 0.0000     |        | 0.00    |
|                               | 0.0000     |        | 0.00    | 0.0000     |        | 0.00    | 0.0000     |        | 0.00    |
| Comp Mole Frac (Styrene)      | 0.0000     |        | 0.00    | 0.0000     |        | 0.00    | 0.0000     |        | 0.00    |
| Comp Mole Frac (H2O)          | 0.0000     |        | 0.00    | 0.0000     |        | 0.00    | 0.0000     |        | 0.00    |
| Comp Mole Frac (Nitrogen)     | 0.0000     |        | 0.00    | 0.0000     |        | 0.00    | 0.0000     |        | 0.00    |
| Total                         |            | 1      |         |            | 1      |         |            | 1      |         |
|                               |            |        |         |            |        |         |            |        |         |
|                               | 4147       |        |         | 4148       |        |         | 4149       |        |         |
| Mass Flow (kg/h)              | 53973      | 53973  | 0.00    | 53973      | 53973  | 0.00    | 53973      | 53973  | 0.00    |
| Molar Flow (kgmole/h)         | 1923.94    | 1923.9 | 0.00    | 1923.94    | 1923.9 | 0.00    | 1923.94    | 1923.9 | 0.00    |
| Temperature (C)               | -12.7      | -12.7  | 0.00    | -4.2       | -4.2   | 0.00    | 35         | 35     | 0.00    |
| Pressure (kg/cm2_g)           | 37.3       | 37.3   | 0.00    | 36.2       | 36.2   | 0.00    | 36         | 36     | 0.00    |

# Simulation Report – ECC 860 KTA

## Working Stage 6

---

|                               | 4150       |        |         | 4151       |        |         | 4156       |        |         |
|-------------------------------|------------|--------|---------|------------|--------|---------|------------|--------|---------|
|                               | Simulation | Design | %-Error | Simulation | Design | %-Error | Simulation | Design | %-Error |
| Comp Mole Frac (Hydrogen)     | 0.0114     | 0.0114 | 0.00    | 0.0027     | 0.0027 | 0.00    | 0.0000     |        | 0.00    |
| Comp Mole Frac (CO)           | 0.0000     |        | 0.00    | 0.0000     |        | 0.00    | 0.0000     |        | 0.00    |
| Comp Mole Frac (Methane)      | 0.0379     | 0.0379 | 0.00    | 0.0088     | 0.0088 | 0.00    | 0.0001     | 0.0001 | 0.00    |
| Comp Mole Frac (Acetylene)    | 0.0000     |        | 0.00    | 0.0000     |        | 0.00    | 0.0109     | 0.0109 | 0.00    |
| Comp Mole Frac (Ethylene)     | 0.0047     | 0.0047 | 0.00    | 0.0049     | 0.0049 | 0.00    | 0.6090     | 0.6091 | 0.02    |
| Comp Mole Frac (Ethane)       | 0.9411     | 0.9411 | 0.00    | 0.9785     | 0.9785 | 0.00    | 0.1047     | 0.1047 | 0.00    |
| Comp Mole Frac (Propadiene)   | 0.0000     |        | 0.00    | 0.0000     |        | 0.00    | 0.0081     | 0.0081 | 0.00    |
| Comp Mole Frac (Propene)      | 0.0048     | 0.0048 | 0.00    | 0.0050     | 0.0049 | 2.04    | 0.1958     | 0.1958 | 0.00    |
| Comp Mole Frac (Propane)      | 0.0000     |        | 0.00    | 0.0000     |        | 0.00    | 0.0059     | 0.0059 | 0.00    |
| Comp Mole Frac (13-Butadiene) | 0.0000     |        | 0.00    | 0.0000     |        | 0.00    | 0.0214     | 0.0214 | 0.00    |
| Comp Mole Frac (1-Butene)     | 0.0000     |        | 0.00    | 0.0000     |        | 0.00    | 0.0305     | 0.0305 | 0.00    |
| Comp Mole Frac (n-Butane)     | 0.0000     |        | 0.00    | 0.0000     |        | 0.00    | 0.0096     | 0.0096 | 0.00    |
| Comp Mole Frac (n-Pentane)    | 0.0000     |        | 0.00    | 0.0000     |        | 0.00    | 0.0035     | 0.0035 | 0.00    |
| Comp Mole Frac (n-Hexane)     | 0.0000     |        | 0.00    | 0.0000     |        | 0.00    | 0.0001     | 0.0001 | 0.00    |
| Comp Mole Frac (n-Heptane)    | 0.0000     |        | 0.00    | 0.0000     |        | 0.00    | 0.0000     |        | 0.00    |
| Comp Mole Frac (n-Octane)     | 0.0000     |        | 0.00    | 0.0000     |        | 0.00    | 0.0000     |        | 0.00    |
| Comp Mole Frac (Benzene)      | 0.0000     |        | 0.00    | 0.0000     |        | 0.00    | 0.0004     | 0.0004 | 0.00    |
| Comp Mole Frac (Toluene)      | 0.0000     |        | 0.00    | 0.0000     |        | 0.00    | 0.0000     |        | 0.00    |
| Comp Mole Frac (p-Xylene)     | 0.0000     |        | 0.00    | 0.0000     |        | 0.00    | 0.0000     |        | 0.00    |
|                               | 0.0000     |        | 0.00    | 0.0000     |        | 0.00    | 0.0000     |        | 0.00    |
| Comp Mole Frac (Styrene)      | 0.0000     |        | 0.00    | 0.0000     |        | 0.00    | 0.0000     |        | 0.00    |
| Comp Mole Frac (H2O)          | 0.0000     |        | 0.00    | 0.0000     |        | 0.00    | 0.0000     |        | 0.00    |
| Comp Mole Frac (Nitrogen)     | 0.0001     | 0.0001 | 0.00    | 0.0001     | 0.0001 | 0.00    | 0.0000     |        | 0.00    |
| Total                         |            | 1      |         |            | 0.9999 |         |            | 1.0001 |         |
|                               |            |        |         |            |        |         |            |        |         |
|                               | 4150       |        |         | 4151       |        |         | 4156       |        |         |
| Mass Flow (kg/h)              | 3798       | 3798   | 0.00    | 16682      | 16682  | 0.00    | 143588     | 143588 | 0.00    |
| Molar Flow (kgmole/h)         | 129.77     | 129.8  | 0.02    | 557.53     | 557.5  | 0.01    | 4343.08    | 4344.4 | 0.03    |
| Temperature (C)               | -62        | -62    | 0.00    | -41.13     | -42.8  | -3.90   | -50.9      | -50.9  | 0.00    |
| Pressure (kg/cm2_g)           | 6.82       | 6.82   | 0.00    | 6.77       | 6.77   | 0.00    | 27.9       | 27.9   | 0.00    |

# Simulation Report – ECC 860 KTA

## Working Stage 6

---

|                               | 4157       |        |         | 4158       |        |         | 4159       |        |         |
|-------------------------------|------------|--------|---------|------------|--------|---------|------------|--------|---------|
|                               | Simulation | Design | %-Error | Simulation | Design | %-Error | Simulation | Design | %-Error |
| Comp Mole Frac (Hydrogen)     | 0.0000     |        | 0.00    | 0.0000     |        | 0.00    | 0.0000     |        | 0.00    |
| Comp Mole Frac (CO)           | 0.0000     |        | 0.00    | 0.0000     |        | 0.00    | 0.0000     |        | 0.00    |
| Comp Mole Frac (Methane)      | 0.0001     | 0.0001 | 0.00    | 0.0001     | 0.0001 | 0.00    | 0.0001     | 0.0001 | 0.00    |
| Comp Mole Frac (Acetylene)    | 0.0109     | 0.0109 | 0.00    | 0.0109     | 0.0109 | 0.00    | 0.0109     | 0.0109 | 0.00    |
| Comp Mole Frac (Ethylene)     | 0.6090     | 0.6091 | 0.02    | 0.6090     | 0.6091 | 0.02    | 0.6090     | 0.6091 | 0.02    |
| Comp Mole Frac (Ethane)       | 0.1047     | 0.1047 | 0.00    | 0.1047     | 0.1047 | 0.00    | 0.1047     | 0.1047 | 0.00    |
| Comp Mole Frac (Propadiene)   | 0.0081     | 0.0081 | 0.00    | 0.0081     | 0.0081 | 0.00    | 0.0081     | 0.0081 | 0.00    |
| Comp Mole Frac (Propene)      | 0.1958     | 0.1958 | 0.00    | 0.1958     | 0.1958 | 0.00    | 0.1958     | 0.1958 | 0.00    |
| Comp Mole Frac (Propane)      | 0.0059     | 0.0059 | 0.00    | 0.0059     | 0.0059 | 0.00    | 0.0059     | 0.0059 | 0.00    |
| Comp Mole Frac (13-Butadiene) | 0.0214     | 0.0214 | 0.00    | 0.0214     | 0.0214 | 0.00    | 0.0214     | 0.0214 | 0.00    |
| Comp Mole Frac (1-Butene)     | 0.0305     | 0.0305 | 0.00    | 0.0305     | 0.0305 | 0.00    | 0.0305     | 0.0305 | 0.00    |
| Comp Mole Frac (n-Butane)     | 0.0096     | 0.0096 | 0.00    | 0.0096     | 0.0096 | 0.00    | 0.0096     | 0.0096 | 0.00    |
| Comp Mole Frac (n-Pentane)    | 0.0035     | 0.0035 | 0.00    | 0.0035     | 0.0035 | 0.00    | 0.0035     | 0.0035 | 0.00    |
| Comp Mole Frac (n-Hexane)     | 0.0001     | 0.0001 | 0.00    | 0.0001     | 0.0001 | 0.00    | 0.0001     | 0.0001 | 0.00    |
| Comp Mole Frac (n-Heptane)    | 0.0000     |        | 0.00    | 0.0000     |        | 0.00    | 0.0000     |        | 0.00    |
| Comp Mole Frac (n-Octane)     | 0.0000     |        | 0.00    | 0.0000     |        | 0.00    | 0.0000     |        | 0.00    |
| Comp Mole Frac (Benzene)      | 0.0004     | 0.0004 | 0.00    | 0.0004     | 0.0004 | 0.00    | 0.0004     | 0.0004 | 0.00    |
| Comp Mole Frac (Toluene)      | 0.0000     |        | 0.00    | 0.0000     |        | 0.00    | 0.0000     |        | 0.00    |
| Comp Mole Frac (p-Xylene)     | 0.0000     |        | 0.00    | 0.0000     |        | 0.00    | 0.0000     |        | 0.00    |
|                               | 0.0000     |        | 0.00    | 0.0000     |        | 0.00    | 0.0000     |        | 0.00    |
| Comp Mole Frac (Styrene)      | 0.0000     |        | 0.00    | 0.0000     |        | 0.00    | 0.0000     |        | 0.00    |
| Comp Mole Frac (H2O)          | 0.0000     |        | 0.00    | 0.0000     |        | 0.00    | 0.0000     |        | 0.00    |
| Comp Mole Frac (Nitrogen)     | 0.0000     |        | 0.00    | 0.0000     |        | 0.00    | 0.0000     |        | 0.00    |
| Total                         |            | 1.0001 |         |            | 1.0001 |         |            | 1.0001 |         |
|                               |            |        |         |            |        |         |            |        |         |
|                               | 4157       |        |         | 4158       |        |         | 4159       |        |         |
| Mass Flow (kg/h)              | 143588     | 143588 | 0.00    | 43076      | 43076  | 0.00    | 100512     | 100512 | 0.00    |
| Molar Flow (kgmole/h)         | 4343.08    | 4344.4 | 0.03    | 1302.91    | 1303.3 | 0.03    | 3040.17    | 3041.1 | 0.03    |
| Temperature (C)               | -14        | -14    | 0.00    | -14        | -14    | 0.00    | -14        | -14    | 0.00    |
| Pressure (kg/cm2_g)           | 27         | 27     | 0.00    | 27         | 27     | 0.00    | 27         | 27     | 0.00    |

# Simulation Report – ECC 860 KTA

## Working Stage 6

---

|                               | 4160       |        |         | 4161       |        |         | 4167       |        |         |
|-------------------------------|------------|--------|---------|------------|--------|---------|------------|--------|---------|
|                               | Simulation | Design | %-Error | Simulation | Design | %-Error | Simulation | Design | %-Error |
| Comp Mole Frac (Hydrogen)     | 0.9697     | 0.9652 | 0.47    | 0.0027     | 0.0027 | 0.00    | 0.0526     | 0.0526 | 0.00    |
| Comp Mole Frac (CO)           | 0.0028     | 0.0026 | 7.69    | 0.0000     |        | 0.00    | 0.0019     | 0.0019 | 0.00    |
| Comp Mole Frac (Methane)      | 0.0265     | 0.0313 | 15.34   | 0.0088     | 0.0088 | 0.00    | 0.9413     | 0.9414 | 0.01    |
| Comp Mole Frac (Acetylene)    | 0.0000     |        | 0.00    | 0.0000     |        | 0.00    | 0.0001     | 0.0001 | 0.00    |
| Comp Mole Frac (Ethylene)     | 0.0000     |        | 0.00    | 0.0049     | 0.0049 | 0.00    | 0.0037     | 0.0037 | 0.00    |
| Comp Mole Frac (Ethane)       | 0.0000     |        | 0.00    | 0.9785     | 0.9785 | 0.00    | 0.0000     |        | 0.00    |
| Comp Mole Frac (Propadiene)   | 0.0000     |        | 0.00    | 0.0000     |        | 0.00    | 0.0000     |        | 0.00    |
| Comp Mole Frac (Propene)      | 0.0000     |        | 0.00    | 0.0050     | 0.0049 | 2.04    | 0.0000     |        | 0.00    |
| Comp Mole Frac (Propane)      | 0.0000     |        | 0.00    | 0.0000     |        | 0.00    | 0.0000     |        | 0.00    |
| Comp Mole Frac (13-Butadiene) | 0.0000     |        | 0.00    | 0.0000     |        | 0.00    | 0.0000     |        | 0.00    |
| Comp Mole Frac (1-Butene)     | 0.0000     |        | 0.00    | 0.0000     |        | 0.00    | 0.0000     |        | 0.00    |
| Comp Mole Frac (n-Butane)     | 0.0000     |        | 0.00    | 0.0000     |        | 0.00    | 0.0000     |        | 0.00    |
| Comp Mole Frac (n-Pentane)    | 0.0000     |        | 0.00    | 0.0000     |        | 0.00    | 0.0000     |        | 0.00    |
| Comp Mole Frac (n-Hexane)     | 0.0000     |        | 0.00    | 0.0000     |        | 0.00    | 0.0000     |        | 0.00    |
| Comp Mole Frac (n-Heptane)    | 0.0000     |        | 0.00    | 0.0000     |        | 0.00    | 0.0000     |        | 0.00    |
| Comp Mole Frac (n-Octane)     | 0.0000     |        | 0.00    | 0.0000     |        | 0.00    | 0.0000     |        | 0.00    |
| Comp Mole Frac (Benzene)      | 0.0000     |        | 0.00    | 0.0000     |        | 0.00    | 0.0000     |        | 0.00    |
| Comp Mole Frac (Toluene)      | 0.0000     |        | 0.00    | 0.0000     |        | 0.00    | 0.0000     |        | 0.00    |
| Comp Mole Frac (p-Xylene)     | 0.0000     |        | 0.00    | 0.0000     |        | 0.00    | 0.0000     |        | 0.00    |
|                               | 0.0000     |        | 0.00    | 0.0000     |        | 0.00    | 0.0000     |        | 0.00    |
| Comp Mole Frac (Styrene)      | 0.0000     |        | 0.00    | 0.0000     |        | 0.00    | 0.0000     |        | 0.00    |
| Comp Mole Frac (H2O)          | 0.0000     |        | 0.00    | 0.0000     |        | 0.00    | 0.0000     |        | 0.00    |
| Comp Mole Frac (Nitrogen)     | 0.0010     | 0.0009 | 11.11   | 0.0001     | 0.0001 | 0.00    | 0.0004     | 0.0004 | 0.00    |
| Total                         |            | 1      |         |            | 0.9999 |         |            | 1.0001 |         |
|                               |            |        |         |            |        |         |            |        |         |
|                               | 4160       |        |         | 4161       |        |         | 4167       |        |         |
| Mass Flow (kg/h)              | 3333.43    | 3330   | 0.10    | 16682      | 16682  | 0.00    | 32350      | 32350  | 0.00    |
| Molar Flow (kgmole/h)         | 1340.65    | 1307.4 | 2.54    | 557.53     | 557.5  | 0.01    | 2103.64    | 2103.6 | 0.00    |
| Temperature (C)               | 35         | 35     | 0.00    | -40.5      | -40.5  | 0.00    | -134.9     | -134.9 | 0.00    |
| Pressure (kg/cm2_g)           | 32.22      | 32.22  | 0.00    | 6.72       | 6.72   | 0.00    | 5.46       | 5.46   | 0.00    |

# Simulation Report – ECC 860 KTA

## Working Stage 6

---

|                               | 4188       |        |         | 4190       |        |         | 4201       |        |         |
|-------------------------------|------------|--------|---------|------------|--------|---------|------------|--------|---------|
|                               | Simulation | Design | %-Error | Simulation | Design | %-Error | Simulation | Design | %-Error |
| Comp Mole Frac (Hydrogen)     | 0.0097     | 0.0131 | 25.95   | 0.0710     | 0.0721 | 1.53    | 0.0000     |        | 0.00    |
| Comp Mole Frac (CO)           | 0.0003     | 0.0004 | 25.00   | 0.0020     | 0.002  | 0.00    | 0.0000     |        | 0.00    |
| Comp Mole Frac (Methane)      | 0.2324     | 0.2316 | 0.35    | 0.9222     | 0.9208 | 0.15    | 0.0001     | 0.0001 | 0.00    |
| Comp Mole Frac (Acetylene)    | 0.0084     | 0.0081 | 3.70    | 0.0001     | 0.0001 | 0.00    | 0.0109     | 0.0109 | 0.00    |
| Comp Mole Frac (Ethylene)     | 0.4412     | 0.4397 | 0.34    | 0.0042     | 0.0046 | 8.70    | 0.6090     | 0.6091 | 0.02    |
| Comp Mole Frac (Ethane)       | 0.0812     | 0.081  | 0.30    | 0.0000     |        | 0.00    | 0.1047     | 0.1047 | 0.00    |
| Comp Mole Frac (Propadiene)   | 0.0066     | 0.0066 | 0.00    | 0.0000     |        | 0.00    | 0.0081     | 0.0081 | 0.00    |
| Comp Mole Frac (Propene)      | 0.1609     | 0.1603 | 0.37    | 0.0000     |        | 0.00    | 0.1958     | 0.1958 | 0.00    |
| Comp Mole Frac (Propane)      | 0.0049     | 0.0048 | 2.08    | 0.0000     |        | 0.00    | 0.0059     | 0.0059 | 0.00    |
| Comp Mole Frac (13-Butadiene) | 0.0177     | 0.0177 | 0.00    | 0.0000     |        | 0.00    | 0.0214     | 0.0214 | 0.00    |
| Comp Mole Frac (1-Butene)     | 0.0253     | 0.0253 | 0.00    | 0.0000     |        | 0.00    | 0.0305     | 0.0305 | 0.00    |
| Comp Mole Frac (n-Butane)     | 0.0081     | 0.008  | 1.25    | 0.0000     |        | 0.00    | 0.0096     | 0.0096 | 0.00    |
| Comp Mole Frac (n-Pentane)    | 0.0029     | 0.0029 | 0.00    | 0.0000     |        | 0.00    | 0.0035     | 0.0035 | 0.00    |
| Comp Mole Frac (n-Hexane)     | 0.0000     | 0.0001 | 100.00  | 0.0000     |        | 0.00    | 0.0001     | 0.0001 | 0.00    |
| Comp Mole Frac (n-Heptane)    | 0.0000     |        | 0.00    | 0.0000     |        | 0.00    | 0.0000     |        | 0.00    |
| Comp Mole Frac (n-Octane)     | 0.0000     |        | 0.00    | 0.0000     |        | 0.00    | 0.0000     |        | 0.00    |
| Comp Mole Frac (Benzene)      | 0.0003     | 0.0003 | 0.00    | 0.0000     |        | 0.00    | 0.0004     | 0.0004 | 0.00    |
| Comp Mole Frac (Toluene)      | 0.0000     |        | 0.00    | 0.0000     |        | 0.00    | 0.0000     |        | 0.00    |
| Comp Mole Frac (p-Xylene)     | 0.0000     |        | 0.00    | 0.0000     |        | 0.00    | 0.0000     |        | 0.00    |
|                               | 0.0000     |        | 0.00    | 0.0000     |        | 0.00    | 0.0000     |        | 0.00    |
| Comp Mole Frac (Styrene)      | 0.0000     |        | 0.00    | 0.0000     |        | 0.00    | 0.0000     |        | 0.00    |
| Comp Mole Frac (H2O)          | 0.0000     |        | 0.00    | 0.0000     |        | 0.00    | 0.0000     |        | 0.00    |
| Comp Mole Frac (Nitrogen)     | 0.0001     | 0.0001 | 0.00    | 0.0004     | 0.0004 | 0.00    | 0.0000     |        | 0.00    |
| Total                         |            | 1      |         |            | 1      |         |            | 1.0001 |         |
|                               |            |        |         |            |        |         |            |        |         |
|                               | 4188       |        |         | 4190       |        |         | 4201       |        |         |
| Mass Flow (kg/h)              | 75877.17   | 75849  | 0.04    | 9967.75    | 7913   | 25.97   | 58026.17   | 58145  | 0.20    |
| Molar Flow (kgmole/h)         | 2604.96    | 2612.7 | 0.30    | 657.02     | 523.4  | 25.53   | 1757.07    | 1759.2 | 0.12    |
| Temperature (C)               | -99        | -97.4  | -1.64   | 35         | 35     | 0.00    | -15.81     | -14    | -12.93  |
| Pressure (kg/cm2_g)           | 34.07      | 34.07  | 0.00    | 5.24       | 5.23   | 0.19    | 21.68      | 21.68  | 0.00    |

# Simulation Report – ECC 860 KTA

## Working Stage 6

|                               | 4236       |        |         | 4307       |        |         | 4309       |        |         |
|-------------------------------|------------|--------|---------|------------|--------|---------|------------|--------|---------|
|                               | Simulation | Design | %-Error | Simulation | Design | %-Error | Simulation | Design | %-Error |
| Comp Mole Frac (Hydrogen)     | 0.0000     |        | 0.00    | 0.0000     |        | 0.00    | 0.0000     |        | 0.00    |
| Comp Mole Frac (CO)           | 0.0000     |        | 0.00    | 0.0000     |        | 0.00    | 0.0000     |        | 0.00    |
| Comp Mole Frac (Methane)      | 0.0001     | 0.0001 | 0.00    | 0.0000     |        | 0.00    | 0.0000     |        | 0.00    |
| Comp Mole Frac (Acetylene)    | 0.0109     | 0.0109 | 0.00    | 0.0000     |        | 0.00    | 0.0000     |        | 0.00    |
| Comp Mole Frac (Ethylene)     | 0.6090     | 0.6091 | 0.02    | 0.0050     | 0.005  | 0.00    | 0.0050     | 0.005  | 0.00    |
| Comp Mole Frac (Ethane)       | 0.1047     | 0.1047 | 0.00    | 0.9899     | 0.9898 | 0.01    | 0.9899     | 0.9898 | 0.01    |
| Comp Mole Frac (Propadiene)   | 0.0081     | 0.0081 | 0.00    | 0.0000     |        | 0.00    | 0.0000     |        | 0.00    |
| Comp Mole Frac (Propene)      | 0.1958     | 0.1958 | 0.00    | 0.0050     | 0.005  | 0.00    | 0.0050     | 0.005  | 0.00    |
| Comp Mole Frac (Propane)      | 0.0059     | 0.0059 | 0.00    | 0.0000     |        | 0.00    | 0.0000     |        | 0.00    |
| Comp Mole Frac (13-Butadiene) | 0.0214     | 0.0214 | 0.00    | 0.0000     |        | 0.00    | 0.0000     |        | 0.00    |
| Comp Mole Frac (1-Butene)     | 0.0305     | 0.0305 | 0.00    | 0.0000     |        | 0.00    | 0.0000     |        | 0.00    |
| Comp Mole Frac (n-Butane)     | 0.0096     | 0.0096 | 0.00    | 0.0000     |        | 0.00    | 0.0000     |        | 0.00    |
| Comp Mole Frac (n-Pentane)    | 0.0035     | 0.0035 | 0.00    | 0.0000     |        | 0.00    | 0.0000     |        | 0.00    |
| Comp Mole Frac (n-Hexane)     | 0.0001     | 0.0001 | 0.00    | 0.0000     |        | 0.00    | 0.0000     |        | 0.00    |
| Comp Mole Frac (n-Heptane)    | 0.0000     |        | 0.00    | 0.0000     |        | 0.00    | 0.0000     |        | 0.00    |
| Comp Mole Frac (n-Octane)     | 0.0000     |        | 0.00    | 0.0000     |        | 0.00    | 0.0000     |        | 0.00    |
| Comp Mole Frac (Benzene)      | 0.0004     | 0.0004 | 0.00    | 0.0000     |        | 0.00    | 0.0000     |        | 0.00    |
| Comp Mole Frac (Toluene)      | 0.0000     |        | 0.00    | 0.0000     |        | 0.00    | 0.0000     |        | 0.00    |
| Comp Mole Frac (p-Xylene)     | 0.0000     |        | 0.00    | 0.0000     |        | 0.00    | 0.0000     |        | 0.00    |
|                               | 0.0000     |        | 0.00    | 0.0000     |        | 0.00    | 0.0000     |        | 0.00    |
| Comp Mole Frac (Styrene)      | 0.0000     |        | 0.00    | 0.0000     |        | 0.00    | 0.0000     |        | 0.00    |
| Comp Mole Frac (H2O)          | 0.0000     |        | 0.00    | 0.0000     |        | 0.00    | 0.0000     |        | 0.00    |
| Comp Mole Frac (Nitrogen)     | 0.0000     |        | 0.00    | 0.0001     | 0.0001 | 0.00    | 0.0001     | 0.0001 | 0.00    |
| Total                         |            | 1.0001 |         |            | 0.9999 |         |            | 0.9999 |         |
|                               |            |        |         |            |        |         |            |        |         |
|                               | 4236       |        |         | 4307       |        |         | 4309       |        |         |
| Mass Flow (kg/h)              | 100512     | 100512 | 0.00    | 12884      | 12884  | 0.00    | 3725       | 3725   | 0.00    |
| Molar Flow (kgmole/h)         | 3040.17    | 3041.1 | 0.03    | 427.76     | 427.8  | 0.01    | 123.67     | 123.7  | 0.02    |
| Temperature (C)               | -14.12     | -14    | -0.86   | -11.4      | -11.4  | 0.00    | -9.5       | -9.5   | 0.00    |
| Pressure (kg/cm2_g)           | 22.88      | 22.88  | 0.00    | 17.39      | 17.39  | 0.00    | 31.48      | 31.48  | 0.00    |

# Simulation Report – ECC 860 KTA

## Working Stage 6

---

|                               | 4324       |        |         | 4327       |        |         | 4328       |        |         |
|-------------------------------|------------|--------|---------|------------|--------|---------|------------|--------|---------|
|                               | Simulation | Design | %-Error | Simulation | Design | %-Error | Simulation | Design | %-Error |
| Comp Mole Frac (Hydrogen)     | 0.0000     |        | 0.00    | 0.0000     |        | 0.00    | 0.0000     |        | 0.00    |
| Comp Mole Frac (CO)           | 0.0000     |        | 0.00    | 0.0000     |        | 0.00    | 0.0000     |        | 0.00    |
| Comp Mole Frac (Methane)      | 0.0001     | 0.0001 | 0.00    | 0.0001     | 0.0001 | 0.00    | 0.0001     | 0.0001 | 0.00    |
| Comp Mole Frac (Acetylene)    | 0.0000     |        | 0.00    | 0.0000     |        | 0.00    | 0.0000     |        | 0.00    |
| Comp Mole Frac (Ethylene)     | 0.9995     | 0.9995 | 0.00    | 0.9995     | 0.9995 | 0.00    | 0.9995     | 0.9995 | 0.00    |
| Comp Mole Frac (Ethane)       | 0.0004     | 0.0004 | 0.00    | 0.0004     | 0.0004 | 0.00    | 0.0004     | 0.0004 | 0.00    |
| Comp Mole Frac (Propadiene)   | 0.0000     |        | 0.00    | 0.0000     |        | 0.00    | 0.0000     |        | 0.00    |
| Comp Mole Frac (Propene)      | 0.0000     |        | 0.00    | 0.0000     |        | 0.00    | 0.0000     |        | 0.00    |
| Comp Mole Frac (Propane)      | 0.0000     |        | 0.00    | 0.0000     |        | 0.00    | 0.0000     |        | 0.00    |
| Comp Mole Frac (13-Butadiene) | 0.0000     |        | 0.00    | 0.0000     |        | 0.00    | 0.0000     |        | 0.00    |
| Comp Mole Frac (1-Butene)     | 0.0000     |        | 0.00    | 0.0000     |        | 0.00    | 0.0000     |        | 0.00    |
| Comp Mole Frac (n-Butane)     | 0.0000     |        | 0.00    | 0.0000     |        | 0.00    | 0.0000     |        | 0.00    |
| Comp Mole Frac (n-Pentane)    | 0.0000     |        | 0.00    | 0.0000     |        | 0.00    | 0.0000     |        | 0.00    |
| Comp Mole Frac (n-Hexane)     | 0.0000     |        | 0.00    | 0.0000     |        | 0.00    | 0.0000     |        | 0.00    |
| Comp Mole Frac (n-Heptane)    | 0.0000     |        | 0.00    | 0.0000     |        | 0.00    | 0.0000     |        | 0.00    |
| Comp Mole Frac (n-Octane)     | 0.0000     |        | 0.00    | 0.0000     |        | 0.00    | 0.0000     |        | 0.00    |
| Comp Mole Frac (Benzene)      | 0.0000     |        | 0.00    | 0.0000     |        | 0.00    | 0.0000     |        | 0.00    |
| Comp Mole Frac (Toluene)      | 0.0000     |        | 0.00    | 0.0000     |        | 0.00    | 0.0000     |        | 0.00    |
| Comp Mole Frac (p-Xylene)     | 0.0000     |        | 0.00    | 0.0000     |        | 0.00    | 0.0000     |        | 0.00    |
|                               | 0.0000     |        | 0.00    | 0.0000     |        | 0.00    | 0.0000     |        | 0.00    |
| Comp Mole Frac (Styrene)      | 0.0000     |        | 0.00    | 0.0000     |        | 0.00    | 0.0000     |        | 0.00    |
| Comp Mole Frac (H2O)          | 0.0000     |        | 0.00    | 0.0000     |        | 0.00    | 0.0000     |        | 0.00    |
| Comp Mole Frac (Nitrogen)     | 0.0000     |        | 0.00    | 0.0000     |        | 0.00    | 0.0000     |        | 0.00    |
| Total                         |            | 1      |         |            | 1      |         |            | 1      |         |
|                               |            |        |         |            |        |         |            |        |         |
|                               | 4324       |        |         | 4327       |        |         | 4328       |        |         |
| Mass Flow (kg/h)              | 53973      | 53973  | 0.00    | 53973      | 53973  | 0.00    | 0          | 0      | 0.00    |
| Molar Flow (kgmole/h)         | 1923.94    | 1923.9 | 0.00    | 1923.94    | 1923.9 | 0.00    | 0          | 0      | 0.00    |
| Temperature (C)               | -34.5      | -34.5  | 0.00    | -34.5      | -34.5  | 0.00    | -35.17     | -34.5  | -1.94   |
| Pressure (kg/cm2_g)           | 38.5       | 38.5   | 0.00    | 38.5       | 38.5   | 0.00    | 38.5       | 38.5   | 0.00    |

# Simulation Report – ECC 860 KTA

## Working Stage 6

|                               | 4329       |        |         | 4330       |        |         | 4759       |        |         |
|-------------------------------|------------|--------|---------|------------|--------|---------|------------|--------|---------|
|                               | Simulation | Design | %-Error | Simulation | Design | %-Error | Simulation | Design | %-Error |
| Comp Mole Frac (Hydrogen)     | 0.0000     |        | 0.00    | 0.0000     |        | 0.00    | 0.0000     |        | 0.00    |
| Comp Mole Frac (CO)           | 0.0000     |        | 0.00    | 0.0000     |        | 0.00    | 0.0000     |        | 0.00    |
| Comp Mole Frac (Methane)      | 0.0001     | 0.0001 | 0.00    | 0.0001     | 0.0001 | 0.00    | 0.0001     | 0.0001 | 0.00    |
| Comp Mole Frac (Acetylene)    | 0.0000     |        | 0.00    | 0.0000     |        | 0.00    | 0.0109     | 0.0109 | 0.00    |
| Comp Mole Frac (Ethylene)     | 0.9995     | 0.9995 | 0.00    | 0.9995     | 0.9995 | 0.00    | 0.6090     | 0.6091 | 0.02    |
| Comp Mole Frac (Ethane)       | 0.0004     | 0.0004 | 0.00    | 0.0004     | 0.0004 | 0.00    | 0.1047     | 0.1047 | 0.00    |
| Comp Mole Frac (Propadiene)   | 0.0000     |        | 0.00    | 0.0000     |        | 0.00    | 0.0081     | 0.0081 | 0.00    |
| Comp Mole Frac (Propene)      | 0.0000     |        | 0.00    | 0.0000     |        | 0.00    | 0.1958     | 0.1958 | 0.00    |
| Comp Mole Frac (Propane)      | 0.0000     |        | 0.00    | 0.0000     |        | 0.00    | 0.0059     | 0.0059 | 0.00    |
| Comp Mole Frac (13-Butadiene) | 0.0000     |        | 0.00    | 0.0000     |        | 0.00    | 0.0214     | 0.0214 | 0.00    |
| Comp Mole Frac (1-Butene)     | 0.0000     |        | 0.00    | 0.0000     |        | 0.00    | 0.0305     | 0.0305 | 0.00    |
| Comp Mole Frac (n-Butane)     | 0.0000     |        | 0.00    | 0.0000     |        | 0.00    | 0.0096     | 0.0096 | 0.00    |
| Comp Mole Frac (n-Pentane)    | 0.0000     |        | 0.00    | 0.0000     |        | 0.00    | 0.0035     | 0.0035 | 0.00    |
| Comp Mole Frac (n-Hexane)     | 0.0000     |        | 0.00    | 0.0000     |        | 0.00    | 0.0001     | 0.0001 | 0.00    |
| Comp Mole Frac (n-Heptane)    | 0.0000     |        | 0.00    | 0.0000     |        | 0.00    | 0.0000     |        | 0.00    |
| Comp Mole Frac (n-Octane)     | 0.0000     |        | 0.00    | 0.0000     |        | 0.00    | 0.0000     |        | 0.00    |
| Comp Mole Frac (Benzene)      | 0.0000     |        | 0.00    | 0.0000     |        | 0.00    | 0.0004     | 0.0004 | 0.00    |
| Comp Mole Frac (Toluene)      | 0.0000     |        | 0.00    | 0.0000     |        | 0.00    | 0.0000     |        | 0.00    |
| Comp Mole Frac (p-Xylene)     | 0.0000     |        | 0.00    | 0.0000     |        | 0.00    | 0.0000     |        | 0.00    |
|                               | 0.0000     |        | 0.00    | 0.0000     |        | 0.00    | 0.0000     |        | 0.00    |
| Comp Mole Frac (Styrene)      | 0.0000     |        | 0.00    | 0.0000     |        | 0.00    | 0.0000     |        | 0.00    |
| Comp Mole Frac (H2O)          | 0.0000     |        | 0.00    | 0.0000     |        | 0.00    | 0.0000     |        | 0.00    |
| Comp Mole Frac (Nitrogen)     | 0.0000     |        | 0.00    | 0.0000     |        | 0.00    | 0.0000     |        | 0.00    |
| Total                         |            | 1      |         |            | 1      |         |            | 1.0001 |         |
|                               |            |        |         |            |        |         |            |        |         |
|                               | 4329       |        |         | 4330       |        |         | 4759       |        |         |
| Mass Flow (kg/h)              | 0          | 0      | 0.00    | 53973      | 53973  | 0.00    | 14950.17   | 15068  | 0.78    |
| Molar Flow (kgmole/h)         | 0          | 0      | 0.00    | 1923.94    | 1923.9 | 0.00    | 454.15     | 455.9  | 0.38    |
| Temperature (C)               | 35         | 35     | 0.00    | 35         | 35     | 0.00    | -20.66     | -14    | -47.57  |
| Pressure (kg/cm2_g)           | 36         | 36     | 0.00    | 36         | 36     | 0.00    | 21.68      | 21.68  | 0.00    |



# Simulation Report – ECC 860 KTA

## Working Stage 6

|                               | 5007       |        |         | 5008       |        |         | 5027       |        |         |
|-------------------------------|------------|--------|---------|------------|--------|---------|------------|--------|---------|
|                               | Simulation | Design | %-Error | Simulation | Design | %-Error | Simulation | Design | %-Error |
| Comp Mole Frac (Hydrogen)     | 0.0000     |        | 0.00    | 0.0000     |        | 0.00    | 0.0000     |        | 0.00    |
| Comp Mole Frac (CO)           | 0.0000     |        | 0.00    | 0.0000     |        | 0.00    | 0.0000     |        | 0.00    |
| Comp Mole Frac (Methane)      | 0.0000     |        | 0.00    | 0.0000     |        | 0.00    | 0.0000     |        | 0.00    |
| Comp Mole Frac (Acetylene)    | 0.0000     |        | 0.00    | 0.0000     |        | 0.00    | 0.0000     |        | 0.00    |
| Comp Mole Frac (Ethylene)     | 0.0000     |        | 0.00    | 0.0000     |        | 0.00    | 0.0000     |        | 0.00    |
| Comp Mole Frac (Ethane)       | 0.0000     |        | 0.00    | 0.0000     |        | 0.00    | 0.0000     |        | 0.00    |
| Comp Mole Frac (Propadiene)   | 0.0000     |        | 0.00    | 0.0000     |        | 0.00    | 0.0000     |        | 0.00    |
| Comp Mole Frac (Propene)      | 1.0000     | 1      | 0.00    | 1.0000     | 1      | 0.00    | 1.0000     | 1      | 0.00    |
| Comp Mole Frac (Propane)      | 0.0000     |        | 0.00    | 0.0000     |        | 0.00    | 0.0000     |        | 0.00    |
| Comp Mole Frac (13-Butadiene) | 0.0000     |        | 0.00    | 0.0000     |        | 0.00    | 0.0000     |        | 0.00    |
| Comp Mole Frac (1-Butene)     | 0.0000     |        | 0.00    | 0.0000     |        | 0.00    | 0.0000     |        | 0.00    |
| Comp Mole Frac (n-Butane)     | 0.0000     |        | 0.00    | 0.0000     |        | 0.00    | 0.0000     |        | 0.00    |
| Comp Mole Frac (n-Pentane)    | 0.0000     |        | 0.00    | 0.0000     |        | 0.00    | 0.0000     |        | 0.00    |
| Comp Mole Frac (n-Hexane)     | 0.0000     |        | 0.00    | 0.0000     |        | 0.00    | 0.0000     |        | 0.00    |
| Comp Mole Frac (n-Heptane)    | 0.0000     |        | 0.00    | 0.0000     |        | 0.00    | 0.0000     |        | 0.00    |
| Comp Mole Frac (n-Octane)     | 0.0000     |        | 0.00    | 0.0000     |        | 0.00    | 0.0000     |        | 0.00    |
| Comp Mole Frac (Benzene)      | 0.0000     |        | 0.00    | 0.0000     |        | 0.00    | 0.0000     |        | 0.00    |
| Comp Mole Frac (Toluene)      | 0.0000     |        | 0.00    | 0.0000     |        | 0.00    | 0.0000     |        | 0.00    |
| Comp Mole Frac (p-Xylene)     | 0.0000     |        | 0.00    | 0.0000     |        | 0.00    | 0.0000     |        | 0.00    |
|                               | 0.0000     |        | 0.00    | 0.0000     |        | 0.00    | 0.0000     |        | 0.00    |
| Comp Mole Frac (Styrene)      | 0.0000     |        | 0.00    | 0.0000     |        | 0.00    | 0.0000     |        | 0.00    |
| Comp Mole Frac (H2O)          | 0.0000     |        | 0.00    | 0.0000     |        | 0.00    | 0.0000     |        | 0.00    |
| Comp Mole Frac (Nitrogen)     | 0.0000     |        | 0.00    | 0.0000     |        | 0.00    | 0.0000     |        | 0.00    |
| Total                         |            | 1      |         |            | 1      |         |            | 1      |         |
|                               |            |        |         |            |        |         |            |        |         |
|                               | 5007       |        |         | 5008       |        |         | 5027       |        |         |
| Mass Flow (kg/h)              | 394111     | 394111 | 0.00    | 394111     | 394111 | 0.00    | 242391     | 242391 | 0.00    |
| Molar Flow (kgmole/h)         | 9365.62    | 9365.5 | 0.00    | 9365.62    | 9365.5 | 0.00    | 5760.16    | 5760.1 | 0.00    |
| Temperature (C)               | 41         | 41     | 0.00    | 33.63      | 34.2   | 1.67    | 13.1       | 13.2   | 0.76    |
| Pressure (kg/cm2_g)           | 16.81      | 16.81  | 0.00    | 16.64      | 16.64  | 0.00    | 7.64       | 7.64   | 0.00    |

# Simulation Report – ECC 860 KTA

## Working Stage 6

|                               | 5037       |        |         | 5042       |        |         | 5049       |        |         |
|-------------------------------|------------|--------|---------|------------|--------|---------|------------|--------|---------|
|                               | Simulation | Design | %-Error | Simulation | Design | %-Error | Simulation | Design | %-Error |
| Comp Mole Frac (Hydrogen)     | 0.0000     |        | 0.00    | 0.0000     |        | 0.00    | 0.0000     |        | 0.00    |
| Comp Mole Frac (CO)           | 0.0000     |        | 0.00    | 0.0000     |        | 0.00    | 0.0000     |        | 0.00    |
| Comp Mole Frac (Methane)      | 0.0000     |        | 0.00    | 0.0000     |        | 0.00    | 0.0000     |        | 0.00    |
| Comp Mole Frac (Acetylene)    | 0.0000     |        | 0.00    | 0.0000     |        | 0.00    | 0.0000     |        | 0.00    |
| Comp Mole Frac (Ethylene)     | 0.0000     |        | 0.00    | 0.0000     |        | 0.00    | 0.0000     |        | 0.00    |
| Comp Mole Frac (Ethane)       | 0.0000     |        | 0.00    | 0.0000     |        | 0.00    | 0.0000     |        | 0.00    |
| Comp Mole Frac (Propadiene)   | 0.0000     |        | 0.00    | 0.0000     |        | 0.00    | 0.0000     |        | 0.00    |
| Comp Mole Frac (Propene)      | 1.0000     | 1      | 0.00    | 1.0000     | 1      | 0.00    | 1.0000     | 1      | 0.00    |
| Comp Mole Frac (Propane)      | 0.0000     |        | 0.00    | 0.0000     |        | 0.00    | 0.0000     |        | 0.00    |
| Comp Mole Frac (13-Butadiene) | 0.0000     |        | 0.00    | 0.0000     |        | 0.00    | 0.0000     |        | 0.00    |
| Comp Mole Frac (1-Butene)     | 0.0000     |        | 0.00    | 0.0000     |        | 0.00    | 0.0000     |        | 0.00    |
| Comp Mole Frac (n-Butane)     | 0.0000     |        | 0.00    | 0.0000     |        | 0.00    | 0.0000     |        | 0.00    |
| Comp Mole Frac (n-Pentane)    | 0.0000     |        | 0.00    | 0.0000     |        | 0.00    | 0.0000     |        | 0.00    |
| Comp Mole Frac (n-Hexane)     | 0.0000     |        | 0.00    | 0.0000     |        | 0.00    | 0.0000     |        | 0.00    |
| Comp Mole Frac (n-Heptane)    | 0.0000     |        | 0.00    | 0.0000     |        | 0.00    | 0.0000     |        | 0.00    |
| Comp Mole Frac (n-Octane)     | 0.0000     |        | 0.00    | 0.0000     |        | 0.00    | 0.0000     |        | 0.00    |
| Comp Mole Frac (Benzene)      | 0.0000     |        | 0.00    | 0.0000     |        | 0.00    | 0.0000     |        | 0.00    |
| Comp Mole Frac (Toluene)      | 0.0000     |        | 0.00    | 0.0000     |        | 0.00    | 0.0000     |        | 0.00    |
| Comp Mole Frac (p-Xylene)     | 0.0000     |        | 0.00    | 0.0000     |        | 0.00    | 0.0000     |        | 0.00    |
|                               | 0.0000     |        | 0.00    | 0.0000     |        | 0.00    | 0.0000     |        | 0.00    |
| Comp Mole Frac (Styrene)      | 0.0000     |        | 0.00    | 0.0000     |        | 0.00    | 0.0000     |        | 0.00    |
| Comp Mole Frac (H2O)          | 0.0000     |        | 0.00    | 0.0000     |        | 0.00    | 0.0000     |        | 0.00    |
| Comp Mole Frac (Nitrogen)     | 0.0000     |        | 0.00    | 0.0000     |        | 0.00    | 0.0000     |        | 0.00    |
| Total                         |            | 1      |         |            | 1      |         |            | 1      |         |
|                               |            |        |         |            |        |         |            |        |         |
|                               | 5037       |        |         | 5042       |        |         | 5049       |        |         |
| Mass Flow (kg/h)              | 258973     | 258973 | 0.00    | 258973     | 258973 | 0.00    | 275738     | 275738 | 0.00    |
| Molar Flow (kgmole/h)         | 6154.21    | 6154.2 | 0.00    | 6154.21    | 6154.2 | 0.00    | 6552.62    | 6552.5 | 0.00    |
| Temperature (C)               | -5.8       | -5.8   | 0.00    | -25.3      | -25.3  | 0.00    | -26.8      | -26.8  | 0.00    |
| Pressure (kg/cm2_g)           | 3.97       | 3.97   | 0.00    | 3.83       | 3.83   | 0.00    | 1.41       | 1.41   | 0.00    |

# Simulation Report – ECC 860 KTA

## Working Stage 6

|                               | 5050       |        |         |            | 5079+5028 |         |            |        | 5108    |  |  |
|-------------------------------|------------|--------|---------|------------|-----------|---------|------------|--------|---------|--|--|
|                               | Simulation | Design | %-Error | Simulation | Design    | %-Error | Simulation | Design | %-Error |  |  |
| Comp Mole Frac (Hydrogen)     | 0.0000     |        | 0.00    | 0.0000     |           | 0.00    | 0.0000     |        | 0.00    |  |  |
| Comp Mole Frac (CO)           | 0.0000     |        | 0.00    | 0.0000     |           | 0.00    | 0.0000     |        | 0.00    |  |  |
| Comp Mole Frac (Methane)      | 0.0000     |        | 0.00    | 0.0000     |           | 0.00    | 0.0000     |        | 0.00    |  |  |
| Comp Mole Frac (Acetylene)    | 0.0000     |        | 0.00    | 0.0000     |           | 0.00    | 0.0000     |        | 0.00    |  |  |
| Comp Mole Frac (Ethylene)     | 0.0000     |        | 0.00    | 0.0000     |           | 0.00    | 1.0000     | 1      | 0.00    |  |  |
| Comp Mole Frac (Ethane)       | 0.0000     |        | 0.00    | 0.0000     |           | 0.00    | 0.0000     |        | 0.00    |  |  |
| Comp Mole Frac (Propadiene)   | 0.0000     |        | 0.00    | 0.0000     |           | 0.00    | 0.0000     |        | 0.00    |  |  |
| Comp Mole Frac (Propene)      | 1.0000     | 1      | 0.00    | 1.0000     | 1         | 0.00    | 0.0000     |        | 0.00    |  |  |
| Comp Mole Frac (Propane)      | 0.0000     |        | 0.00    | 0.0000     |           | 0.00    | 0.0000     |        | 0.00    |  |  |
| Comp Mole Frac (13-Butadiene) | 0.0000     |        | 0.00    | 0.0000     |           | 0.00    | 0.0000     |        | 0.00    |  |  |
| Comp Mole Frac (1-Butene)     | 0.0000     |        | 0.00    | 0.0000     |           | 0.00    | 0.0000     |        | 0.00    |  |  |
| Comp Mole Frac (n-Butane)     | 0.0000     |        | 0.00    | 0.0000     |           | 0.00    | 0.0000     |        | 0.00    |  |  |
| Comp Mole Frac (n-Pentane)    | 0.0000     |        | 0.00    | 0.0000     |           | 0.00    | 0.0000     |        | 0.00    |  |  |
| Comp Mole Frac (n-Hexane)     | 0.0000     |        | 0.00    | 0.0000     |           | 0.00    | 0.0000     |        | 0.00    |  |  |
| Comp Mole Frac (n-Heptane)    | 0.0000     |        | 0.00    | 0.0000     |           | 0.00    | 0.0000     |        | 0.00    |  |  |
| Comp Mole Frac (n-Octane)     | 0.0000     |        | 0.00    | 0.0000     |           | 0.00    | 0.0000     |        | 0.00    |  |  |
| Comp Mole Frac (Benzene)      | 0.0000     |        | 0.00    | 0.0000     |           | 0.00    | 0.0000     |        | 0.00    |  |  |
| Comp Mole Frac (Toluene)      | 0.0000     |        | 0.00    | 0.0000     |           | 0.00    | 0.0000     |        | 0.00    |  |  |
| Comp Mole Frac (p-Xylene)     | 0.0000     |        | 0.00    | 0.0000     |           | 0.00    | 0.0000     |        | 0.00    |  |  |
|                               | 0.0000     |        | 0.00    | 0.0000     |           | 0.00    | 0.0000     |        | 0.00    |  |  |
| Comp Mole Frac (Styrene)      | 0.0000     |        | 0.00    | 0.0000     |           | 0.00    | 0.0000     |        | 0.00    |  |  |
| Comp Mole Frac (H2O)          | 0.0000     |        | 0.00    | 0.0000     |           | 0.00    | 0.0000     |        | 0.00    |  |  |
| Comp Mole Frac (Nitrogen)     | 0.0000     |        | 0.00    | 0.0000     |           | 0.00    | 0.0000     |        | 0.00    |  |  |
| Total                         |            | 1      |         |            |           |         |            | 1      |         |  |  |
|                               |            |        |         |            |           |         |            |        |         |  |  |
|                               | 5050       |        |         |            | 5079+5028 |         |            |        | 5108    |  |  |
| Mass Flow (kg/h)              | 275738     | 275738 | 0.00    | 242391     | 242392    | 0.00    | 75801      | 75801  | 0.00    |  |  |
| Molar Flow (kgmole/h)         | 6552.62    | 6552.5 | 0.00    | 5760.16    | 5760.1    | 0.00    | 2701.99    | 2702   | 0.00    |  |  |
| Temperature (C)               | -33.5      | -33.5  | 0.00    | 3.6        | 3.6       | 0.00    | -20        | -20    | 0.00    |  |  |
| Pressure (kg/cm2_g)           | 1.27       | 1.27   | 0.00    | 7.5        | 7.5       | 0.00    | 25.32      | 25.32  | 0.00    |  |  |

# Simulation Report – ECC 860 KTA

## Working Stage 6

---

|                               | 5109       |        |         | 5113       |        |         |
|-------------------------------|------------|--------|---------|------------|--------|---------|
|                               | Simulation | Design | %-Error | Simulation | Design | %-Error |
| Comp Mole Frac (Hydrogen)     | 0.0000     |        | 0.00    | 0.0000     |        | 0.00    |
| Comp Mole Frac (CO)           | 0.0000     |        | 0.00    | 0.0000     |        | 0.00    |
| Comp Mole Frac (Methane)      | 0.0000     |        | 0.00    | 0.0000     |        | 0.00    |
| Comp Mole Frac (Acetylene)    | 0.0000     |        | 0.00    | 0.0000     |        | 0.00    |
| Comp Mole Frac (Ethylene)     | 1.0000     | 1      | 0.00    | 1.0000     | 1      | 0.00    |
| Comp Mole Frac (Ethane)       | 0.0000     |        | 0.00    | 0.0000     |        | 0.00    |
| Comp Mole Frac (Propadiene)   | 0.0000     |        | 0.00    | 0.0000     |        | 0.00    |
| Comp Mole Frac (Propene)      | 0.0000     |        | 0.00    | 0.0000     |        | 0.00    |
| Comp Mole Frac (Propane)      | 0.0000     |        | 0.00    | 0.0000     |        | 0.00    |
| Comp Mole Frac (13-Butadiene) | 0.0000     |        | 0.00    | 0.0000     |        | 0.00    |
| Comp Mole Frac (1-Butene)     | 0.0000     |        | 0.00    | 0.0000     |        | 0.00    |
| Comp Mole Frac (n-Butane)     | 0.0000     |        | 0.00    | 0.0000     |        | 0.00    |
| Comp Mole Frac (n-Pentane)    | 0.0000     |        | 0.00    | 0.0000     |        | 0.00    |
| Comp Mole Frac (n-Hexane)     | 0.0000     |        | 0.00    | 0.0000     |        | 0.00    |
| Comp Mole Frac (n-Heptane)    | 0.0000     |        | 0.00    | 0.0000     |        | 0.00    |
| Comp Mole Frac (n-Octane)     | 0.0000     |        | 0.00    | 0.0000     |        | 0.00    |
| Comp Mole Frac (Benzene)      | 0.0000     |        | 0.00    | 0.0000     |        | 0.00    |
| Comp Mole Frac (Toluene)      | 0.0000     |        | 0.00    | 0.0000     |        | 0.00    |
| Comp Mole Frac (p-Xylene)     | 0.0000     |        | 0.00    | 0.0000     |        | 0.00    |
|                               | 0.0000     |        | 0.00    | 0.0000     |        | 0.00    |
| Comp Mole Frac (Styrene)      | 0.0000     |        | 0.00    | 0.0000     |        | 0.00    |
| Comp Mole Frac (H2O)          | 0.0000     |        | 0.00    | 0.0000     |        | 0.00    |
| Comp Mole Frac (Nitrogen)     | 0.0000     |        | 0.00    | 0.0000     |        | 0.00    |
| Total                         |            | 1      |         |            | 1      |         |
|                               |            |        |         |            |        |         |
|                               | 5109       |        |         | 5113       |        |         |
| Mass Flow (kg/h)              | 35789      | 35788  | 0.00    | 40012      | 40012  | 0.00    |
| Molar Flow (kgmole/h)         | 1275.73    | 1275.7 | 0.00    | 1426.26    | 1426.3 | 0.00    |
| Temperature (C)               | -55        | -55    | 0.00    | -72        | -72    | 0.00    |
| Pressure (kg/cm2_g)           | 25.18      | 25.18  | 0.00    | 25.04      | 25.04  | 0.00    |

# Simulation Report – ECC 860 KTA

## Working Stage 6

|                                          | 4707   |          |       | 4708   |          |       | 4709   |          |       |
|------------------------------------------|--------|----------|-------|--------|----------|-------|--------|----------|-------|
| Komponen (mol%)                          | Data   | Simulasi | Galat | Data   | Simulasi | Galat | Data   | Simulasi | Galat |
| Hydrogen                                 | 17.97  | 17.96    | 0.06% | 17.97  | 17.96    | 0.06% | 46.64  | 46.72    | 0.18% |
| Carbon Monoxide                          | 0.11   | 0.11     | 0.00% | 0.11   | 0.11     | 0.00% | 0.24   | 0.25     | 2.2%  |
| Carbon Dioxide                           |        | 0        | 0.00% |        | 0        | 0.00% |        | 0.00     | 0.0%  |
| Hydrogen Sulfide                         |        | 0        | 0.00% |        | 0        | 0.00% |        | 0.00     | 0.0%  |
| Methane                                  | 29.96  | 29.97    | 0.03% | 29.96  | 29.97    | 0.03% | 41.67  | 41.95    | 0.7%  |
| Acetylene                                | 0.58   | 0.574    | 1.03% | 0.58   | 0.574    | 1.03% | 0.17   | 0.13     | 24.0% |
| Ethylene                                 | 31.42  | 31.42    | 0.00% | 31.42  | 31.42    | 0.00% | 9.81   | 9.57     | 2.4%  |
| Ethane                                   | 5.49   | 5.49     | 0.00% | 5.49   | 5.49     | 0.00% | 1.01   | 0.94     | 6.8%  |
| Propadiene/Methylacetylene               | 0.42   | 0.42     | 0.00% | 0.42   | 0.42     | 0.00% | 0.01   | 0.01     | 0.0%  |
| Propylene                                | 10.27  | 10.27    | 0.00% | 10.27  | 10.27    | 0.00% | 0.36   | 0.34     | 5.1%  |
| Propane                                  | 0.31   | 0.31     | 0.00% | 0.31   | 0.31     | 0.00% | 0.01   | 0.01     | 0.0%  |
| Butadiene/C4 Acetylene                   | 1.12   | 1.12     | 0.00% | 1.12   | 1.12     | 0.00% | 0.01   | 0.0046   | 54.0% |
| Butylenes                                | 1.6    | 1.6      | 0.00% | 1.6    | 1.6      | 0.00% | 0.01   | 0.01     | 0.0%  |
| Butanes                                  | 0.51   | 0.51     | 0.00% | 0.51   | 0.51     | 0.00% | 0      | 0.00     | 0.0%  |
| C5 Hydrocarbons                          | 0.18   | 0.18     | 0.00% | 0.18   | 0.18     | 0.00% |        |          | 0.0%  |
| C6 Non Aromatics                         | 0      | 0        | 0.00% | 0      | 0        | 0.00% |        |          | 0.0%  |
| C7 Non Aromatics                         |        |          | 0.00% |        |          | 0.00% |        |          | 0.0%  |
| C8 Non Aromatics                         |        |          | 0.00% |        |          | 0.00% |        |          | 0.0%  |
| Benzene                                  | 0.02   | 0.02     | 0.00% | 0.02   | 0.02     | 0.00% |        |          | 0.0%  |
| Toluene                                  |        |          | 0.00% |        |          | 0.00% |        |          | 0.0%  |
| Xylene/Ethylbenzene                      |        |          | 0.00% |        |          | 0.00% |        |          | 0.0%  |
| Styrene                                  |        |          | 0.00% |        |          | 0.00% |        |          | 0.0%  |
| C9-204 C                                 |        |          | 0.00% |        |          | 0.00% |        |          | 0.0%  |
| 204 - 208 C                              |        |          | 0.00% |        |          | 0.00% |        |          | 0.0%  |
| Steam/Water                              |        |          | 0.00% |        |          | 0.00% |        |          | 0.0%  |
| Nitrogen                                 | 0.03   | 0.03     | 0.00% | 0.03   | 0.03     | 0.00% | 0.06   | 0.07     | 14.2% |
| Naphta                                   |        |          | 0.00% |        |          | 0.00% |        |          | 0.0%  |
|                                          |        |          |       |        |          |       |        |          |       |
| Total Stream Mass Flow Rate (kg/h)       | 65371  | 65371    | 0.00% | 65371  | 65371    | 0.00% | 11772  | 11676.52 | 0.81% |
| Total Stream Molar Flow Rate (kg mol/hr) | 2918.3 | 2917.483 | 0.03% | 2918.3 | 2917.483 | 0.03% | 1072.1 | 1066.06  | 0.56% |
| Stream Mol Weight ( )                    | 22.4   | 22.41    | 0.04% | 22.4   | 22.40665 | 0.0%  | 10.98  | 10.95296 | 0.2%  |
| Stream Temperature (°C)                  | -35.9  | -35.9    | 0.0%  | -72    | -72      | 0.0%  | -72    | -72.0466 | 0.06% |
| Stream Pressure (kg/cm <sup>2</sup> (g)) | 34.93  | 34.93    | 0.0%  | 34.68  | 34.68    | 0.0%  | 34.55  | 34.55    | 0.00% |

# Simulation Report – ECC 860 KTA

## Working Stage 6

|                                          | 4710   |          |       | 4732  |          |       | 4733  |          |       |
|------------------------------------------|--------|----------|-------|-------|----------|-------|-------|----------|-------|
| Komponen (mol%)                          | Data   | Simulasi | Galat | Data  | Simulasi | Galat | Data  | Simulasi | Galat |
| Hydrogen                                 | 1.31   | 1.40     | 6.53% | 1.31  | 1.40     | 6.53% | 1.31  | 1.40     | 6.53% |
| Carbon Monoxide                          | 0.04   | 0.04     | 0.00% | 0.04  | 0.04     | 0.00% | 0.04  | 0.04     | 0.00% |
| Carbon Dioxide                           |        | 0.00     | 0.00% |       | 0.00     | 0.00% |       | 0.00     | 0.00% |
| Hydrogen Sulfide                         |        | 0.00     | 0.00% |       | 0.00     | 0.00% |       | 0.00     | 0.00% |
| Methane                                  | 23.16  | 23.07    | 0.39% | 23.16 | 23.07    | 0.39% | 23.16 | 23.07    | 0.39% |
| Acetylene                                | 0.81   | 0.83     | 2.47% | 0.81  | 0.83     | 2.49% | 0.81  | 0.83     | 2.49% |
| Ethylene                                 | 43.97  | 44.00    | 0.07% | 43.97 | 44.00    | 0.07% | 43.97 | 44.00    | 0.07% |
| Ethane                                   | 8.1    | 8.10     | 0.00% | 8.1   | 8.10     | 0.00% | 8.1   | 8.10     | 0.00% |
| Propadiene/Methylacetylene               | 0.66   | 0.66     | 0.00% | 0.66  | 0.66     | 0.00% | 0.66  | 0.66     | 0.00% |
| Propylene                                | 16.03  | 15.99    | 0.25% | 16.03 | 15.99    | 0.24% | 16.03 | 15.99    | 0.24% |
| Propane                                  | 0.48   | 0.48     | 0.00% | 0.48  | 0.48     | 0.00% | 0.48  | 0.48     | 0.00% |
| Butadiene/C4 Acetylene                   | 1.77   | 1.77     | 0.00% | 1.77  | 1.77     | 0.00% | 1.77  | 1.77     | 0.00% |
| Butylenes                                | 2.53   | 2.52     | 0.25% | 2.53  | 2.52     | 0.25% | 2.53  | 2.52     | 0.25% |
| Butanes                                  | 0.8    | 0.80     | 0.00% | 0.8   | 0.80     | 0.00% | 0.8   | 0.80     | 0.00% |
| C5 Hydrocarbons                          | 0.29   | 0.29     | 0.00% | 0.29  | 0.29     | 0.00% | 0.29  | 0.29     | 0.00% |
| C6 Non Aromatics                         | 0.01   | 0.01     | 0.00% | 0.01  | 0.01     | 0.00% | 0.01  | 0.01     | 0.00% |
| C7 Non Aromatics                         |        |          | 0.00% |       |          | 0.00% |       |          | 0.00% |
| C8 Non Aromatics                         |        |          | 0.00% |       |          | 0.00% |       |          | 0.00% |
| Benzene                                  | 0.03   | 0.03     | 0.00% | 0.03  | 0.03     | 0.00% | 0.03  | 0.03     | 0.00% |
| Toluene                                  |        |          | 0.00% |       |          | 0.00% |       |          | 0.00% |
| Xylene/Ethylbenzene                      |        |          | 0.00% |       |          | 0.00% |       |          | 0.00% |
| Styrene                                  |        |          | 0.00% |       |          | 0.00% |       |          | 0.00% |
| C9-204 C                                 |        |          | 0.00% |       |          | 0.00% |       |          | 0.00% |
| 204 - 208 C                              |        |          | 0.00% |       |          | 0.00% |       |          | 0.00% |
| Steam/Water                              |        |          | 0.00% |       |          | 0.00% |       |          | 0.00% |
| Nitrogen                                 | 0.01   | 0.01     | 0.00% | 0.01  | 0.01     | 0.00% | 0.01  | 0.01     | 0.00% |
| Naphta                                   |        |          | 0.00% |       |          | 0.00% |       |          | 0.00% |
|                                          |        |          |       |       |          |       |       |          |       |
| Total Stream Mass Flow Rate (kg/h)       | 53599  | 53694.48 | 0.18% | 26800 | 26847.24 | 0.18% | 26800 | 26847.24 | 0.18% |
| Total Stream Molar Flow Rate (kg mol/hr) | 1846.2 | 1851.422 | 0.28% | 923.1 | 925.7112 | 0.28% | 923.1 | 925.7112 | 0.28% |
| Stream Mol Weight ( )                    | 29.03  | 29.00175 | 0.10% | 29.03 |          | 0.00% | 29.03 |          | 0.00% |
| Stream Temperature (°C)                  | -72    | -72.0466 | 0.06% | -97.4 | -97.4    | 0.00% | -97.4 | -97.4    | 0.00% |
| Stream Pressure (kg/cm <sup>2</sup> (g)) | 34.55  | 34.55    | 0.00% | 34.07 | 34.07    | 0.00% | 34.07 | 34.07    | 0.00% |

# Simulation Report – ECC 860 KTA

## Working Stage 6

---

|                                          | 4741  |          |       | 4742   |          |       |
|------------------------------------------|-------|----------|-------|--------|----------|-------|
| Komponen (mol%)                          | Data  | Simulasi | Galat | Data   | Simulasi | Galat |
| Hydrogen                                 | 1.31  | 1.40     | 6.53% | 1.31   | 1.40     | 6.53% |
| Carbon Monoxide                          | 0.04  | 0.04     | 0.00% | 0.04   | 0.04     | 0.00% |
| Carbon Dioxide                           |       | 0.00     | 0.00% |        | 0.00     | 0.00% |
| Hydrogen Sulfide                         |       | 0.00     | 0.00% |        | 0.00     | 0.00% |
| Methane                                  | 23.16 | 23.07    | 0.39% | 23.16  | 23.07    | 0.39% |
| Acetylene                                | 0.81  | 0.83     | 2.49% | 0.81   | 0.83     | 2.49% |
| Ethylene                                 | 43.97 | 44.00    | 0.07% | 43.97  | 44.00    | 0.07% |
| Ethane                                   | 8.1   | 8.10     | 0.00% | 8.1    | 8.10     | 0.00% |
| Propadiene/Methylacetylene               | 0.66  | 0.66     | 0.00% | 0.66   | 0.66     | 0.00% |
| Propylene                                | 16.03 | 15.99    | 0.24% | 16.03  | 15.99    | 0.24% |
| Propane                                  | 0.48  | 0.48     | 0.00% | 0.48   | 0.48     | 0.00% |
| Butadiene/C4 Acetylene                   | 1.77  | 1.77     | 0.00% | 1.77   | 1.77     | 0.00% |
| Butylenes                                | 2.53  | 2.52     | 0.25% | 2.53   | 2.52     | 0.25% |
| Butanes                                  | 0.8   | 0.80     | 0.00% | 0.8    | 0.80     | 0.00% |
| C5 Hydrocarbons                          | 0.29  | 0.29     | 0.00% | 0.29   | 0.29     | 0.00% |
| C6 Non Aromatics                         | 0.01  | 0.01     | 0.00% | 0.01   | 0.01     | 0.00% |
| C7 Non Aromatics                         |       |          | 0.00% |        |          | 0.00% |
| C8 Non Aromatics                         |       |          | 0.00% |        |          | 0.00% |
| Benzene                                  | 0.03  | 0.03     | 0.00% | 0.03   | 0.03     | 0.00% |
| Toluene                                  |       |          | 0.00% |        |          | 0.00% |
| Xylene/Ethylbenzene                      |       |          | 0.00% |        |          | 0.00% |
| Styrene                                  |       |          | 0.00% |        |          | 0.00% |
| C9-204 C                                 |       |          | 0.00% |        |          | 0.00% |
| 204 - 208 C                              |       |          | 0.00% |        |          | 0.00% |
| Steam/Water                              |       |          | 0.00% |        |          | 0.00% |
| Nitrogen                                 | 0.01  | 0.01     | 0.00% | 0.01   | 0.01     | 0.00% |
| Naphta                                   |       |          | 0.00% |        |          | 0.00% |
|                                          |       |          |       |        |          |       |
| Total Stream Mass Flow Rate (kg/h)       | 26800 | 26847.24 | 0.18% | 26800  | 26847.24 | 0.18% |
| Total Stream Molar Flow Rate (kg mol/hr) | 923.1 | 925.7112 | 0.28% | 923.1  | 925.7112 | 0.28% |
| Stream Mol Weight ( )                    | 29.03 |          | 0.00% | 29.03  |          | 0.00% |
| Stream Temperature (°C)                  | -77.9 | -78.3365 | 0.56% | -103.6 | -103.955 | 0.34% |
| Stream Pressure (kg/cm <sup>2</sup> (g)) | 5.61  | 5.61     | 0.00% | 5.57   | 5.57     | 0.00% |

# Simulation Report – ECC 860 KTA

## Working Stage 6

---

|                                          | 4712   |          |         | 4713  |          |       |
|------------------------------------------|--------|----------|---------|-------|----------|-------|
| Komponen (mol%)                          | Data   | Simulasi | Galat   | Data  | Simulasi | Galat |
| Hydrogen                                 | 46.64  | 46.72    | 0.2%    | 54.1  | 53.77    | 0.6%  |
| Carbon Monoxide                          | 0.24   | 0.25     | 2.2%    | 0.26  | 0.27     | 5.2%  |
| Carbon Dioxide                           |        | 0.00     | 0.0%    |       | 0.00     | 0.0%  |
| Hydrogen Sulfide                         |        | 0.00     | 0.0%    |       | 0.00     | 0.0%  |
| Methane                                  | 41.67  | 41.95    | 0.7%    | 41.24 | 41.73    | 1.2%  |
| Acetylene                                | 0.17   | 0.13     | 24.0%   | 0.07  | 0.04     | 47.0% |
| Ethylene                                 | 9.81   | 9.57     | 2.4%    | 3.98  | 3.87     | 2.7%  |
| Ethane                                   | 1.01   | 0.94     | 6.8%    | 0.25  | 0.22     | 12.1% |
| Propadiene/Methylacetylene               | 0.01   | 0.01     | 0.0%    |       |          | 0.0%  |
| Propylene                                | 0.36   | 0.34     | 5.1%    | 0.02  | 0.01     | 29.0% |
| Propane                                  | 0.01   | 0.01     | 0.0%    |       |          | 0.0%  |
| Butadiene/C4 Acetylene                   | 0.01   | 0.0046   | 54.0%   |       |          | 0.0%  |
| Butylenes                                | 0.01   | 0.01     | 0.0%    |       |          | 0.0%  |
| Butanes                                  | 0      | 0.00     | #DIV/0! |       |          | 0.0%  |
| C5 Hydrocarbons                          |        |          | 0.0%    |       |          | 0.0%  |
| C6 Non Aromatics                         |        |          | 0.0%    |       |          | 0.0%  |
| C7 Non Aromatics                         |        |          | 0.0%    |       |          | 0.0%  |
| C8 Non Aromatics                         |        |          | 0.0%    |       |          | 0.0%  |
| Benzene                                  |        |          | 0.0%    |       |          | 0.0%  |
| Toluene                                  |        |          | 0.0%    |       |          | 0.0%  |
| Xylene/Ethylbenzene                      |        |          | 0.0%    |       |          | 0.0%  |
| Styrene                                  |        |          | 0.0%    |       |          | 0.0%  |
| C9-204 C                                 |        |          | 0.0%    |       |          | 0.0%  |
| 204 - 208 C                              |        |          | 0.0%    |       |          | 0.0%  |
| Steam/Water                              |        |          | 0.0%    |       |          | 0.0%  |
| Nitrogen                                 | 0.06   | 0.07     | 14.2%   | 0.07  | 0.08     | 10.3% |
| Naphta                                   |        |          | 0.0%    |       |          | 0.0%  |
|                                          |        |          |         |       |          |       |
| Total Stream Mass Flow Rate (kg/h)       | 11772  | 11676.52 | 0.81%   | 8283  | 8345.368 | 0.75% |
| Total Stream Molar Flow Rate (kg mol/hr) | 1072.1 | 1066.06  | 0.56%   | 918.5 | 920.3606 | 0.20% |
| Stream Mol Weight ( )                    | 10.98  |          | 0.00%   | 9.02  |          | 0.00% |
| Stream Temperature (°C)                  | -98    | -98      | 0.00%   | -98.1 | -98.1    | 0.00% |
| Stream Pressure (kg/cm <sup>2</sup> (g)) | 34.13  | 34.13    | 0.00%   | 33.92 | 33.92    | 0.00% |



# Simulation Report – ECC 860 KTA

## Working Stage 6

---

|                                          | 4714  |          |       | 4743   |          |        |
|------------------------------------------|-------|----------|-------|--------|----------|--------|
| Komponen (mol%)                          | Data  | Simulasi | Galat | Data   | Simulasi | Galat  |
| Hydrogen                                 | 2     | 1.70     | 14.9% | 2      | 1.70     | 14.88% |
| Carbon Monoxide                          | 0.07  | 0.06     | 7.3%  | 0.07   | 0.06     | 7.29%  |
| Carbon Dioxide                           |       | 0.00     | 0.0%  |        | 0.00     | 0.00%  |
| Hydrogen Sulfide                         |       | 0.00     | 0.0%  |        | 0.00     | 0.00%  |
| Methane                                  | 44.24 | 43.33    | 2.1%  | 44.24  | 43.33    | 2.06%  |
| Acetylene                                | 0.77  | 0.72     | 6.9%  | 0.77   | 0.72     | 6.87%  |
| Ethylene                                 | 44.69 | 45.97    | 2.9%  | 44.69  | 45.97    | 2.87%  |
| Ethane                                   | 5.55  | 5.54     | 0.1%  | 5.55   | 5.54     | 0.10%  |
| Propadiene/Methylacetylene               | 0.05  | 0.06     | 11.4% | 0.05   | 0.06     | 11.40% |
| Propylene                                | 2.42  | 2.43     | 0.5%  | 2.42   | 2.43     | 0.50%  |
| Propane                                  | 0.06  | 0.05     | 9.2%  | 0.06   | 0.05     | 9.17%  |
| Butadiene/C4 Acetylene                   | 0.05  | 0.03     | 31.6% | 0.05   | 0.03     | 31.60% |
| Butylenes                                | 0.07  | 0.05     | 23.0% | 0.07   | 0.05     | 23.00% |
| Butanes                                  | 0.02  | 0.03     | 26.5% | 0.02   | 0.03     | 26.50% |
| C5 Hydrocarbons                          |       |          | 0.0%  |        |          | 0.00%  |
| C6 Non Aromatics                         |       |          | 0.0%  |        |          | 0.00%  |
| C7 Non Aromatics                         |       |          | 0.0%  |        |          | 0.00%  |
| C8 Non Aromatics                         |       |          | 0.0%  |        |          | 0.00%  |
| Benzene                                  |       |          | 0.0%  |        |          | 0.00%  |
| Toluene                                  |       |          | 0.0%  |        |          | 0.00%  |
| Xylene/Ethylbenzene                      |       |          | 0.0%  |        |          | 0.00%  |
| Styrene                                  |       |          | 0.0%  |        |          | 0.00%  |
| C9-204 C                                 |       |          | 0.0%  |        |          | 0.00%  |
| 204 - 208 C                              |       |          | 0.0%  |        |          | 0.00%  |
| Steam/Water                              |       |          | 0.0%  |        |          | 0.00%  |
| Nitrogen                                 | 0.02  | 0.01     | 36.0% | 0.02   | 0.01     | 36.00% |
| Naphta                                   |       |          | 0.0%  |        |          | 0.00%  |
|                                          |       |          |       |        |          |        |
| Total Stream Mass Flow Rate (kg/h)       | 3489  | 3331.149 | 4.52% | 3489   | 3331.149 | 4.52%  |
| Total Stream Molar Flow Rate (kg mol/hr) | 153.6 | 145.6997 | 5.14% | 153.6  | 145.6997 | 5.14%  |
| Stream Mol Weight ( )                    | 22.71 |          | 0.00% | 22.71  |          | 0.00%  |
| Stream Temperature (°C)                  | -98.1 | -98.1    | 0.00% | -115.5 | -115.5   | 0.00%  |
| Stream Pressure (kg/cm <sup>2</sup> (g)) | 33.92 | 33.92    | 0.00% | 5.55   | 5.55     | 0.00%  |

# Simulation Report – ECC 860 KTA

## Working Stage 6

---

| Komponen (mol%)                          | 4715  |          |       | 4716   |          |       |
|------------------------------------------|-------|----------|-------|--------|----------|-------|
|                                          | Data  | Simulasi | Galat | Data   | Simulasi | Galat |
| Hydrogen                                 | 54.1  | 53.77    | 0.6%  | 76.28  | 76.2725  | 0.0%  |
| Carbon Monoxide                          | 0.26  | 0.27     | 5.2%  | 0.3    | 0.3      | 0.0%  |
| Carbon Dioxide                           |       | 0.00     | 0.0%  |        | 0        | 0.0%  |
| Hydrogen Sulfide                         |       | 0.00     | 0.0%  |        | 0        | 0.0%  |
| Methane                                  | 41.24 | 41.73    | 1.2%  | 23.14  | 23.13    | 0.0%  |
| Acetylene                                | 0.07  | 0.04     | 47.0% | 0      | 0        | 0.0%  |
| Ethylene                                 | 3.98  | 3.87     | 2.7%  | 0.18   | 0.18     | 0.0%  |
| Ethane                                   | 0.25  | 0.22     | 12.1% | 0      | 0        | 0.0%  |
| Propadiene/Methylacetylene               |       |          | 0.0%  |        |          | 0.0%  |
| Propylene                                | 0.02  | 0.01     | 29.0% |        |          | 0.0%  |
| Propane                                  |       |          | 0.0%  |        |          | 0.0%  |
| Butadiene/C4 Acetylene                   |       |          | 0.0%  |        |          | 0.0%  |
| Butylenes                                |       |          | 0.0%  |        |          | 0.0%  |
| Butanes                                  |       |          | 0.0%  |        |          | 0.0%  |
| C5 Hydrocarbons                          |       |          | 0.0%  |        |          | 0.0%  |
| C6 Non Aromatics                         |       |          | 0.0%  |        |          | 0.0%  |
| C7 Non Aromatics                         |       |          | 0.0%  |        |          | 0.0%  |
| C8 Non Aromatics                         |       |          | 0.0%  |        |          | 0.0%  |
| Benzene                                  |       |          | 0.0%  |        |          | 0.0%  |
| Toluene                                  |       |          | 0.0%  |        |          | 0.0%  |
| Xylene/Ethylbenzene                      |       |          | 0.0%  |        |          | 0.0%  |
| Styrene                                  |       |          | 0.0%  |        |          | 0.0%  |
| C9-204 C                                 |       |          | 0.0%  |        |          | 0.0%  |
| 204 - 208 C                              |       |          | 0.0%  |        |          | 0.0%  |
| Steam/Water                              |       |          | 0.0%  |        |          | 0.0%  |
| Nitrogen                                 | 0.07  | 0.08     | 10.3% | 0.09   | 0.095    | 5.7%  |
| Naphta                                   |       |          | 0.0%  |        |          | 0.0%  |
|                                          |       |          |       |        |          |       |
| Total Stream Mass Flow Rate (kg/h)       | 8283  | 8345.368 | 0.75% | 3459   | 3478.878 | 0.57% |
| Total Stream Molar Flow Rate (kg mol/hr) | 918.5 | 920.3606 | 0.20% | 639.2  | 639.8098 | 0.10% |
| Stream Mol Weight ( )                    | 9.02  |          | 0.00% | 5.41   |          | 0.0%  |
| Stream Temperature (°C)                  | -132  | -132     | 0.00% | -132.1 | -132.055 | 0.0%  |
| Stream Pressure (kg/cm <sup>2</sup> (g)) | 33.74 | 33.74    | 0.00% | 33.56  | 33.56    | 0.0%  |

# Simulation Report – ECC 860 KTA

## Working Stage 6

---

|                                          | 4717   |          |        | 4744   |          |        |
|------------------------------------------|--------|----------|--------|--------|----------|--------|
| Komponen (mol%)                          | Data   | Simulasi | Galat  | Data   | Simulasi | Galat  |
| Hydrogen                                 | 3.35   | 2.19     | 34.69% | 3.35   | 2.19     | 34.69% |
| Carbon Monoxide                          | 0.18   | 0.17     | 3.17%  | 0.18   | 0.17     | 3.17%  |
| Carbon Dioxide                           |        | 0.00     | 0.00%  |        | 0.00     | 0.00%  |
| Hydrogen Sulfide                         |        | 0.00     | 0.00%  |        | 0.00     | 0.00%  |
| Methane                                  | 82.66  | 84.37    | 2.07%  | 82.66  | 84.37    | 2.07%  |
| Acetylene                                | 0.21   | 0.12     | 42.43% | 0.21   | 0.12     | 42.43% |
| Ethylene                                 | 12.68  | 12.35    | 2.62%  | 12.68  | 12.35    | 2.62%  |
| Ethane                                   | 0.81   | 0.72     | 11.49% | 0.81   | 0.72     | 11.49% |
| Propadiene/Methylacetylene               |        |          | 0.00%  |        |          | 0.00%  |
| Propylene                                | 0.05   | 0.05     | 0.00%  | 0.05   | 0.05     | 0.00%  |
| Propane                                  |        |          | 0.00%  |        |          | 0.00%  |
| Butadiene/C4 Acetylene                   |        |          | 0.00%  |        |          | 0.00%  |
| Butylenes                                |        |          | 0.00%  |        |          | 0.00%  |
| Butanes                                  |        |          | 0.00%  |        |          | 0.00%  |
| C5 Hydrocarbons                          |        |          | 0.00%  |        |          | 0.00%  |
| C6 Non Aromatics                         |        |          | 0.00%  |        |          | 0.00%  |
| C7 Non Aromatics                         |        |          | 0.00%  |        |          | 0.00%  |
| C8 Non Aromatics                         |        |          | 0.00%  |        |          | 0.00%  |
| Benzene                                  |        |          | 0.00%  |        |          | 0.00%  |
| Toluene                                  |        |          | 0.00%  |        |          | 0.00%  |
| Xylene/Ethylbenzene                      |        |          | 0.00%  |        |          | 0.00%  |
| Styrene                                  |        |          | 0.00%  |        |          | 0.00%  |
| C9-204 C                                 |        |          | 0.00%  |        |          | 0.00%  |
| 204 - 208 C                              |        |          | 0.00%  |        |          | 0.00%  |
| Steam/Water                              |        |          | 0.00%  |        |          | 0.00%  |
| Nitrogen                                 | 0.04   | 0.04     | 0.00%  | 0.04   | 0.04     | 0.00%  |
| Naphta                                   |        |          | 0.00%  |        |          | 0.00%  |
|                                          |        |          |        |        |          |        |
| Total Stream Mass Flow Rate (kg/h)       | 4824   | 4866.491 | 0.88%  | 4824   | 4866.491 | 0.88%  |
| Total Stream Molar Flow Rate (kg mol/hr) | 279.3  | 280.5508 | 0.45%  | 279.3  | 280.5508 | 0.45%  |
| Stream Mol Weight ( )                    | 17.27  |          | 0.00%  | 17.27  |          | 0.00%  |
| Stream Temperature (°C)                  | -132.1 | -132.055 | 0.03%  | -138.3 | -137.557 | 0.54%  |
| Stream Pressure (kg/cm <sup>2</sup> (g)) | 33.56  | 33.56    | 0.00%  | 5.53   | 5.53     | 0.00%  |

# Simulation Report – ECC 860 KTA

## Working Stage 6

|                                          | 4718  |          |         | 4719  |          |         | 4720  |          |        |
|------------------------------------------|-------|----------|---------|-------|----------|---------|-------|----------|--------|
| Komponen (mol%)                          | Data  | Simulasi | Galat   | Data  | Simulasi | Galat   | Data  | Simulasi | Galat  |
| Hydrogen                                 | 76.28 | 76.27    | 0.01%   | 96.58 | 96.69    | 0.12%   | 3.2   | 1.39     | 56.65% |
| Carbon Monoxide                          | 0.3   | 0.3      | 0.00%   | 0.24  | 0.26     | 9.17%   | 0.53  | 0.52     | 2.25%  |
| Carbon Dioxide                           |       |          | 0.00%   |       |          | 0.00%   |       | 0.00     | 0.00%  |
| Hydrogen Sulfide                         |       |          | 0.00%   |       |          | 0.00%   |       | 0.00     | 0.00%  |
| Methane                                  | 23.14 | 23.13    | 0.02%   | 3.1   | 2.95     | 4.83%   | 95.31 | 97.15    | 1.93%  |
| Acetylene                                | 0     | 0.00     | #DIV/0! |       | 0.00     | 0.00%   | 0.02  | 0.002    | 88.00% |
| Ethylene                                 | 0.18  | 0.18     | 0.00%   |       | 0.00     | #DIV/0! | 0.82  | 0.83     | 0.62%  |
| Ethane                                   | 0     | 0.00     | #DIV/0! |       |          | 0.00%   | 0.02  | 0.01     | 28.50% |
| Propadiene/Methylacetylene               |       |          | 0.00%   |       |          | 0.00%   |       |          | 0.00%  |
| Propylene                                |       |          | 0.00%   |       |          | 0.00%   |       |          | 0.00%  |
| Propane                                  |       |          | 0.00%   |       |          | 0.00%   |       |          | 0.00%  |
| Butadiene/C4 Acetylene                   |       |          | 0.00%   |       |          | 0.00%   |       |          | 0.00%  |
| Butylenes                                |       |          | 0.00%   |       |          | 0.00%   |       |          | 0.00%  |
| Butanes                                  |       |          | 0.00%   |       |          | 0.00%   |       |          | 0.00%  |
| C5 Hydrocarbons                          |       |          | 0.00%   |       |          | 0.00%   |       |          | 0.00%  |
| C6 Non Aromatics                         |       |          | 0.00%   |       |          | 0.00%   |       |          | 0.00%  |
| C7 Non Aromatics                         |       |          | 0.00%   |       |          | 0.00%   |       |          | 0.00%  |
| C8 Non Aromatics                         |       |          | 0.00%   |       |          | 0.00%   |       |          | 0.00%  |
| Benzene                                  |       |          | 0.00%   |       |          | 0.00%   |       |          | 0.00%  |
| Toluene                                  |       |          | 0.00%   |       |          | 0.00%   |       |          | 0.00%  |
| Xylene/Ethylbenzene                      |       |          | 0.00%   |       |          | 0.00%   |       |          | 0.00%  |
| Styrene                                  |       |          | 0.00%   |       |          | 0.00%   |       |          | 0.00%  |
| C9-204 C                                 |       |          | 0.00%   |       |          | 0.00%   |       |          | 0.00%  |
| 204 - 208 C                              |       |          | 0.00%   |       |          | 0.00%   |       |          | 0.00%  |
| Steam/Water                              |       |          | 0.00%   |       |          | 0.00%   |       |          | 0.00%  |
| Nitrogen                                 | 0.09  | 0.0951   | 5.67%   | 0.08  | 0.09     | 16.25%  | 0.1   | 0.1      | 0.00%  |
| Naphta                                   |       |          | 0.00%   |       |          | 0.00%   |       |          | 0.00%  |
|                                          |       |          |         |       |          |         |       |          |        |
| Total Stream Mass Flow Rate (kg/h)       | 3459  | 3478.878 | 0.57%   | 1267  | 1269.951 | 0.23%   | 2192  | 2208.926 | 0.77%  |
| Total Stream Molar Flow Rate (kg mol/hr) | 639.2 | 639.8098 | 0.10%   | 500.2 | 501.7438 | 0.31%   | 138.9 | 138.066  | 0.60%  |
| Stream Mol Weight ( )                    | 5.41  |          | 0.00%   | 2.53  |          | 0.00%   | 15.77 |          | 0.00%  |
| Stream Temperature (°C)                  | -167  | -167     | 0.00%   | -167  | -167.016 | 0.01%   | -167  | -167.016 | 0.01%  |
| Stream Pressure (kg/cm <sup>2</sup> (g)) | 33.23 | 33.23    | 0.00%   | 33.09 | 33.09    | 0.00%   | 33.09 | 33.09    | 0.00%  |

# Simulation Report – ECC 860 KTA

## Working Stage 6

---

|                                          | 4721  |          |         | 4722   |          |         |
|------------------------------------------|-------|----------|---------|--------|----------|---------|
| Komponen (mol%)                          | Data  | Simulasi | Galat   | Data   | Simulasi | Galat   |
| Hydrogen                                 | 96.58 | 96.69    | 0.12%   | 96.58  | 96.69    | 0.12%   |
| Carbon Monoxide                          | 0.24  | 0.26     | 9.17%   | 0.24   | 0.26     | 9.17%   |
| Carbon Dioxide                           |       | 0.00     | 0.00%   |        | 0.00     | 0.00%   |
| Hydrogen Sulfide                         |       | 0.00     | 0.00%   |        | 0.00     | 0.00%   |
| Methane                                  | 3.1   | 2.95     | 4.83%   | 3.1    | 2.95     | 4.83%   |
| Acetylene                                |       | 0.00     | 0.00%   |        | 0.00     | 0.00%   |
| Ethylene                                 |       | 0.00     | #DIV/0! |        | 0.00     | #DIV/0! |
| Ethane                                   |       |          | 0.00%   |        |          | 0.00%   |
| Propadiene/Methylacetylene               |       |          | 0.00%   |        |          | 0.00%   |
| Propylene                                |       |          | 0.00%   |        |          | 0.00%   |
| Propane                                  |       |          | 0.00%   |        |          | 0.00%   |
| Butadiene/C4 Acetylene                   |       |          | 0.00%   |        |          | 0.00%   |
| Butylenes                                |       |          | 0.00%   |        |          | 0.00%   |
| Butanes                                  |       |          | 0.00%   |        |          | 0.00%   |
| C5 Hydrocarbons                          |       |          | 0.00%   |        |          | 0.00%   |
| C6 Non Aromatics                         |       |          | 0.00%   |        |          | 0.00%   |
| C7 Non Aromatics                         |       |          | 0.00%   |        |          | 0.00%   |
| C8 Non Aromatics                         |       |          | 0.00%   |        |          | 0.00%   |
| Benzene                                  |       |          | 0.00%   |        |          | 0.00%   |
| Toluene                                  |       |          | 0.00%   |        |          | 0.00%   |
| Xylene/Ethylbenzene                      |       |          | 0.00%   |        |          | 0.00%   |
| Styrene                                  |       |          | 0.00%   |        |          | 0.00%   |
| C9-204 C                                 |       |          | 0.00%   |        |          | 0.00%   |
| 204 - 208 C                              |       |          | 0.00%   |        |          | 0.00%   |
| Steam/Water                              |       |          | 0.00%   |        |          | 0.00%   |
| Nitrogen                                 | 0.08  | 0.09     | 16.25%  | 0.08   | 0.09     | 16.25%  |
| Naphta                                   |       |          | 0.00%   |        |          | 0.00%   |
|                                          |       |          |         |        |          |         |
| Total Stream Mass Flow Rate (kg/h)       | 298   | 298.11   | 0.04%   | 298    | 298.11   | 0.04%   |
| Total Stream Molar Flow Rate (kg mol/hr) | 117.7 | 117.78   | 0.07%   | 117.7  | 117.78   | 0.07%   |
| Stream Mol Weight ( )                    | 2.53  |          | 0.00%   | 2.53   |          | 0.00%   |
| Stream Temperature (°C)                  | -167  | -167.016 | 0.01%   | -170.4 | -171.986 | 0.93%   |
| Stream Pressure (kg/cm <sup>2</sup> (g)) | 33.09 | 33.09    | 0.00%   | 4.83   | 4.83     | 0.00%   |

# Simulation Report – ECC 860 KTA

## Working Stage 6

---

|                                          | 4723  |          |         | 4729  |          |         |
|------------------------------------------|-------|----------|---------|-------|----------|---------|
| Komponen (mol%)                          | Data  | Simulasi | Galat   | Data  | Simulasi | Galat   |
| Hydrogen                                 | 96.58 | 96.69    | 0.12%   | 96.58 | 96.69    | 0.12%   |
| Carbon Monoxide                          | 0.24  | 0.26     | 9.17%   | 0.24  | 0.26     | 9.17%   |
| Carbon Dioxide                           |       | 0.00     | 0.00%   |       | 0.00     | 0.00%   |
| Hydrogen Sulfide                         |       | 0.00     | 0.00%   |       | 0.00     | 0.00%   |
| Methane                                  | 3.1   | 2.95     | 4.83%   | 3.1   | 2.95     | 4.83%   |
| Acetylene                                |       | 0.00     | 0.00%   |       | 0.00     | 0.00%   |
| Ethylene                                 |       | 0.00     | #DIV/0! |       | 0.00     | #DIV/0! |
| Ethane                                   |       |          | 0.00%   |       |          | 0.00%   |
| Propadiene/Methylacetylene               |       |          | 0.00%   |       |          | 0.00%   |
| Propylene                                |       |          | 0.00%   |       |          | 0.00%   |
| Propane                                  |       |          | 0.00%   |       |          | 0.00%   |
| Butadiene/C4 Acetylene                   |       |          | 0.00%   |       |          | 0.00%   |
| Butylenes                                |       |          | 0.00%   |       |          | 0.00%   |
| Butanes                                  |       |          | 0.00%   |       |          | 0.00%   |
| C5 Hydrocarbons                          |       |          | 0.00%   |       |          | 0.00%   |
| C6 Non Aromatics                         |       |          | 0.00%   |       |          | 0.00%   |
| C7 Non Aromatics                         |       |          | 0.00%   |       |          | 0.00%   |
| C8 Non Aromatics                         |       |          | 0.00%   |       |          | 0.00%   |
| Benzene                                  |       |          | 0.00%   |       |          | 0.00%   |
| Toluene                                  |       |          | 0.00%   |       |          | 0.00%   |
| Xylene/Ethylbenzene                      |       |          | 0.00%   |       |          | 0.00%   |
| Styrene                                  |       |          | 0.00%   |       |          | 0.00%   |
| C9-204 C                                 |       |          | 0.00%   |       |          | 0.00%   |
| 204 - 208 C                              |       |          | 0.00%   |       |          | 0.00%   |
| Steam/Water                              |       |          | 0.00%   |       |          | 0.00%   |
| Nitrogen                                 | 0.08  | 0.09     | 16.25%  | 0.08  | 0.09     | 16.25%  |
| Naphta                                   |       |          | 0.00%   |       |          | 0.00%   |
|                                          |       |          |         |       |          |         |
| Total Stream Mass Flow Rate (kg/h)       | 969   | 971.8413 | 0.29%   | 969   | 971.8413 | 0.29%   |
| Total Stream Molar Flow Rate (kg mol/hr) | 382.5 | 383.9638 | 0.38%   | 382.5 | 383.9638 | 0.38%   |
| Stream Mol Weight ( )                    | 2.53  |          | 0.00%   | 2.53  |          | 0.00%   |
| Stream Temperature (°C)                  | -167  | -167.016 | 0.01%   | 35    | 35       | 0.00%   |
| Stream Pressure (kg/cm <sup>2</sup> (g)) | 33.09 | 33.09    | 0.00%   | 32.22 | 32.22    | 0.00%   |

# Simulation Report – ECC 860 KTA

## Working Stage 6

|                                          | 4724   |          |         | 4725   |          |        | 4726   |          |        |
|------------------------------------------|--------|----------|---------|--------|----------|--------|--------|----------|--------|
| Komponen (mol%)                          | Data   | Simulasi | Galat   | Data   | Simulasi | Galat  | Data   | Simulasi | Galat  |
| Hydrogen                                 | 3.2    | 1.39     | 56.65%  | 46.02  | 45.36    | 1.44%  | 46.02  | 45.36    | 1.44%  |
| Carbon Monoxide                          | 0.53   | 0.52     | 2.25%   | 0.4    | 0.4      | 0.00%  | 0.4    | 0.40     | 0.00%  |
| Carbon Dioxide                           |        | 0.00     | 0.00%   |        | 0.00     | 0.00%  |        | 0.00     | 0.00%  |
| Hydrogen Sulfide                         |        | 0.00     | 0.00%   |        | 0.00     | 0.00%  |        | 0.00     | 0.00%  |
| Methane                                  | 95.31  | 97.15    | 1.93%   | 53.02  | 53.69    | 1.27%  | 53.02  | 53.69    | 1.27%  |
| Acetylene                                | 0.02   | 0.002    | 88.00%  | 0.01   | 0.001    | 87.00% | 0.01   | 0.001    | 87.00% |
| Ethylene                                 | 0.82   | 0.83     | 0.62%   | 0.45   | 0.44     | 1.20%  | 0.45   | 0.44     | 1.20%  |
| Ethane                                   | 0.02   | 0.01     | 28.50%  | 0.01   | 0.01     | 0.00%  | 0.01   | 0.01     | 0.00%  |
| Propadiene/Methylacetylene               |        | 0.00     | 0.00%   |        |          | 0.00%  |        |          | 0.00%  |
| Propylene                                |        | 0.00     | #DIV/0! |        |          | 0.00%  |        |          | 0.00%  |
| Propane                                  |        |          | 0.00%   |        |          | 0.00%  |        |          | 0.00%  |
| Butadiene/C4 Acetylene                   |        |          | 0.00%   |        |          | 0.00%  |        |          | 0.00%  |
| Butylenes                                |        |          | 0.00%   |        |          | 0.00%  |        |          | 0.00%  |
| Butanes                                  |        |          | 0.00%   |        |          | 0.00%  |        |          | 0.00%  |
| C5 Hydrocarbons                          |        |          | 0.00%   |        |          | 0.00%  |        |          | 0.00%  |
| C6 Non Aromatics                         |        |          | 0.00%   |        |          | 0.00%  |        |          | 0.00%  |
| C7 Non Aromatics                         |        |          | 0.00%   |        |          | 0.00%  |        |          | 0.00%  |
| C8 Non Aromatics                         |        |          | 0.00%   |        |          | 0.00%  |        |          | 0.00%  |
| Benzene                                  |        |          | 0.00%   |        |          | 0.00%  |        |          | 0.00%  |
| Toluene                                  |        |          | 0.00%   |        |          | 0.00%  |        |          | 0.00%  |
| Xylene/Ethylbenzene                      |        |          | 0.00%   |        |          | 0.00%  |        |          | 0.00%  |
| Styrene                                  |        |          | 0.00%   |        |          | 0.00%  |        |          | 0.00%  |
| C9-204 C                                 |        |          | 0.00%   |        |          | 0.00%  |        |          | 0.00%  |
| 204 - 208 C                              |        |          | 0.00%   |        |          | 0.00%  |        |          | 0.00%  |
| Steam/Water                              |        |          | 0.00%   |        |          | 0.00%  |        |          | 0.00%  |
| Nitrogen                                 | 0.1    | 0.1      | 0.00%   | 0.09   | 0.10     | 9.33%  | 0.09   | 0.10     | 9.33%  |
| Naphta                                   |        |          | 0.00%   |        |          | 0.00%  |        |          | 0.00%  |
|                                          |        |          |         |        |          |        |        |          |        |
| Total Stream Mass Flow Rate (kg/h)       | 2192   | 2208.926 | 0.77%   | 2490   | 2507.036 | 0.68%  | 2490   | 2507.036 | 0.68%  |
| Total Stream Molar Flow Rate (kg mol/hr) | 138.9  | 138.066  | 0.60%   | 256.6  | 255.846  | 0.29%  | 256.6  | 255.846  | 0.29%  |
| Stream Mol Weight ( )                    | 15.77  |          | 0.00%   | 9.7    |          | 0.00%  | 9.7    |          | 0.00%  |
| Stream Temperature (°C)                  | -167.2 | -165.833 | 0.82%   | -171.8 | -171.986 | 0.11%  | -137.3 | -137.3   | 0.00%  |
| Stream Pressure (kg/cm <sup>2</sup> (g)) | 4.83   | 4.83     | 0.00%   | 4.83   | 4.83     | 0.00%  | 4.72   | 4.72     | 0.00%  |

# Simulation Report – ECC 860 KTA

## Working Stage 6

|                                          | 4727   |          |         | 4728   |          |         | 4767   |          |       |
|------------------------------------------|--------|----------|---------|--------|----------|---------|--------|----------|-------|
| Komponen (mol%)                          | Data   | Simulasi | Galat   | Data   | Simulasi | Galat   | Data   | Simulasi | Galat |
| Hydrogen                                 | 14.35  | 14.16    | 1.29%   | 14.35  | 14.16    | 1.29%   | 4.73   | 4.73     | 0.00% |
| Carbon Monoxide                          | 0.23   | 0.23     | 0.00%   | 0.23   | 0.23     | 0.00%   | 0.18   | 0.18     | 0.00% |
| Carbon Dioxide                           |        | 0.00     | 0.00%   |        | 0.00     | 0.00%   |        | 0        | 0.00% |
| Hydrogen Sulfide                         |        | 0.00     | 0.00%   |        | 0.00     | 0.00%   |        | 0        | 0.00% |
| Methane                                  | 84.98  | 85.16    | 0.21%   | 84.98  | 85.16    | 0.21%   | 94.68  | 94.68    | 0.00% |
| Acetylene                                | 0.01   | 0.01     | 0.00%   | 0.01   | 0.01     | 0.00%   | 0.01   | 0.01     | 0.00% |
| Ethylene                                 | 0.38   | 0.38     | 0.00%   | 0.38   | 0.38     | 0.00%   | 0.36   | 0.36     | 0.00% |
| Ethane                                   |        | 0.00     | #DIV/0! |        | 0.00     | #DIV/0! | 0      | 0        | 0.00% |
| Propadiene/Methylacetylene               |        |          | 0.00%   |        |          | 0.00%   |        |          | 0.00% |
| Propylene                                |        |          | 0.00%   |        |          | 0.00%   |        |          | 0.00% |
| Propane                                  |        |          | 0.00%   |        |          | 0.00%   |        |          | 0.00% |
| Butadiene/C4 Acetylene                   |        |          | 0.00%   |        |          | 0.00%   |        |          | 0.00% |
| Butylenes                                |        |          | 0.00%   |        |          | 0.00%   |        |          | 0.00% |
| Butanes                                  |        |          | 0.00%   |        |          | 0.00%   |        |          | 0.00% |
| C5 Hydrocarbons                          |        |          | 0.00%   |        |          | 0.00%   |        |          | 0.00% |
| C6 Non Aromatics                         |        |          | 0.00%   |        |          | 0.00%   |        |          | 0.00% |
| C7 Non Aromatics                         |        |          | 0.00%   |        |          | 0.00%   |        |          | 0.00% |
| C8 Non Aromatics                         |        |          | 0.00%   |        |          | 0.00%   |        |          | 0.00% |
| Benzene                                  |        |          | 0.00%   |        |          | 0.00%   |        |          | 0.00% |
| Toluene                                  |        |          | 0.00%   |        |          | 0.00%   |        |          | 0.00% |
| Xylene/Ethylbenzene                      |        |          | 0.00%   |        |          | 0.00%   |        |          | 0.00% |
| Styrene                                  |        |          | 0.00%   |        |          | 0.00%   |        |          | 0.00% |
| C9-204 C                                 |        |          | 0.00%   |        |          | 0.00%   |        |          | 0.00% |
| 204 - 208 C                              |        |          | 0.00%   |        |          | 0.00%   |        |          | 0.00% |
| Steam/Water                              |        |          | 0.00%   |        |          | 0.00%   |        |          | 0.00% |
| Nitrogen                                 | 0.05   | 0.05     | 0.00%   | 0.05   | 0.05     | 0.00%   | 0.04   | 0.04     | 0.00% |
| Naphta                                   |        |          | 0.00%   |        |          | 0.00%   |        |          | 0.00% |
|                                          |        |          |         |        |          |         |        |          |       |
| Total Stream Mass Flow Rate (kg/h)       | 15543  | 15546.83 | 0.02%   | 15543  | 15546.83 | 0.02%   | 13053  | 13039.8  | 0.10% |
| Total Stream Molar Flow Rate (kg mol/hr) | 1101.4 | 1099.846 | 0.14%   | 1101.4 | 1099.846 | 0.14%   | 844.8  | 844      | 0.09% |
| Stream Mol Weight ( )                    | 14.11  |          | 0.00%   | 14.11  |          | 0.00%   | 15.45  |          | 0.00% |
| Stream Temperature (°C)                  | -135.1 | -135.1   | 0.00%   | 35     | 35       | 0.00%   | -132.7 | -132.693 | 0.01% |
| Stream Pressure (kg/cm² (g))             | 4.72   | 4.72     | 0.00%   | 4.5    | 4.5      | 0.00%   | 5.51   | 5.51     | 0.00% |



# Simulation Report – ECC 860 KTA

## Working Stage 6

|                                          | 5208   |          |       | 5209   |          |       | 5210   |          |       |
|------------------------------------------|--------|----------|-------|--------|----------|-------|--------|----------|-------|
| Komponen (mol%)                          | Data   | Simulasi | Galat | Data   | Simulasi | Galat | Data   | Simulasi | Galat |
| Hydrogen                                 | 0.18   | 0.18     | 0%    | 0.18   | 0.18     | 0%    | 0.55   | 0.53     | 3.05% |
| Carbon Monoxide                          |        | 0        | 0%    |        | 0.00     | 0%    |        | 0.00     | 0.00% |
| Carbon Dioxide                           |        | 0        | 0%    |        | 0.00     | 0%    |        | 0.00     | 0.00% |
| Hydrogen Sulfide                         |        | 0        | 0%    |        | 0.00     | 0%    |        | 0.00     | 0.00% |
| Methane                                  | 8.65   | 8.6509   | 0%    | 8.65   | 8.65     | 0%    | 20.21  | 20.44    | 1.16% |
| Acetylene                                |        | 0        | 0%    |        | 0.00     | 0%    |        | 0.00     | 0.00% |
| Ethylene                                 | 26.11  | 26.1126  | 0%    | 26.11  | 26.11    | 0%    | 38.6   | 38.33    | 0.70% |
| Ethane                                   |        | 0        | 0%    |        | 0.00     | 0%    |        | 0.00     | 0.00% |
| Propadiene/Methylacetylene               |        | 0        | 0%    |        | 0.00     | 0%    |        | 0.00     | 0.00% |
| Propylene                                | 65.05  | 65.0565  | 0%    | 65.05  | 65.06    | 0%    | 40.65  | 40.69    | 0.11% |
| Propane                                  |        |          | 0%    |        |          | 0%    |        |          | 0%    |
| Butadiene/C4 Acetylene                   |        |          | 0%    |        |          | 0%    |        |          | 0%    |
| Butylenes                                |        |          | 0%    |        |          | 0%    |        |          | 0%    |
| Butanes                                  |        |          | 0%    |        |          | 0%    |        |          | 0%    |
| C5 Hydrocarbons                          |        |          | 0%    |        |          | 0%    |        |          | 0%    |
| C6 Non Aromatics                         |        |          | 0%    |        |          | 0%    |        |          | 0%    |
| C7 Non Aromatics                         |        |          | 0%    |        |          | 0%    |        |          | 0%    |
| C8 Non Aromatics                         |        |          | 0%    |        |          | 0%    |        |          | 0%    |
| Benzene                                  |        |          | 0%    |        |          | 0%    |        |          | 0%    |
| Toluene                                  |        |          | 0%    |        |          | 0%    |        |          | 0%    |
| Xylene/Ethylbenzene                      |        |          | 0%    |        |          | 0%    |        |          | 0%    |
| Styrene                                  |        |          | 0%    |        |          | 0%    |        |          | 0%    |
| C9-204 C                                 |        |          | 0%    |        |          | 0%    |        |          | 0%    |
| 204 - 208 C                              |        |          | 0%    |        |          | 0%    |        |          | 0%    |
| Steam/Water                              |        |          | 0%    |        |          | 0%    |        |          | 0%    |
| Nitrogen                                 |        |          | 0%    |        |          | 0%    |        |          | 0%    |
| Naphta                                   |        |          | 0%    |        |          | 0%    |        |          | 0%    |
|                                          |        |          |       |        |          |       |        |          |       |
| Total Stream Mass Flow Rate (kg/h)       | 134430 | 134430   | 0.00% | 134430 | 134430   | 0.00% | 36589  | 35550.27 | 2.84% |
| Total Stream Molar Flow Rate (kg mol/hr) | 3724.7 | 3724.521 | 0.00% | 3724.7 | 3724.521 | 0.00% | 1173.3 | 1140.617 | 2.79% |
| Stream Mol Weight ( )                    | 36.09  |          |       | 36.09  |          | 0.00% | 31.19  |          | 0.00% |
| Stream Temperature (°C)                  | 37.3   | 37.3     | 0.00% | 18.1   | 18.1     | 0.00% | 17.9   | 17.98269 | 0.46% |
| Stream Pressure (kg/cm² (g))             | 23.45  | 23.45    | 0.00% | 23.17  | 23.17    | 0.00% | 23.08  | 23.08    | 0.00% |

# Simulation Report – ECC 860 KTA

## Working Stage 6

|                                          | 5211   |          |       | 5212   |          |       | 5213  |          |       |
|------------------------------------------|--------|----------|-------|--------|----------|-------|-------|----------|-------|
| Komponen (mol%)                          | Data   | Simulasi | Galat | Data   | Simulasi | Galat | Data  | Simulasi | Galat |
| Hydrogen                                 | 0.55   | 0.5332   | 3%    | 0.55   | 0.5332   | 3%    | 0.55  | 0.5332   | 3%    |
| Carbon Monoxide                          |        | 0        | 0%    |        | 0        | 0%    |       | 0        | 0%    |
| Carbon Dioxide                           |        | 0        | 0%    |        | 0        | 0%    |       | 0        | 0%    |
| Hydrogen Sulfide                         |        | 0        | 0%    |        | 0        | 0%    |       | 0        | 0%    |
| Methane                                  | 20.21  | 20.4442  | 1%    | 20.21  | 20.4442  | 1%    | 20.21 | 20.4442  | 1%    |
| Acetylene                                |        | 0        | 0%    |        | 0        | 0%    |       | 0        | 0%    |
| Ethylene                                 | 38.6   | 38.3283  | 1%    | 38.6   | 38.3283  | 1%    | 38.6  | 38.3283  | 1%    |
| Ethane                                   |        | 0        | 0%    |        | 0        | 0%    |       | 0        | 0%    |
| Propadiene/Methylacetylene               |        | 0        | 0%    |        | 0        | 0%    |       | 0        | 0%    |
| Propylene                                | 40.65  | 40.6944  | 0%    | 40.65  | 40.6944  | 0%    | 40.65 | 40.6944  | 0%    |
| Propane                                  |        |          | 0%    |        |          | 0%    |       |          | 0%    |
| Butadiene/C4 Acetylene                   |        |          | 0%    |        |          | 0%    |       |          | 0%    |
| Butylenes                                |        |          | 0%    |        |          | 0%    |       |          | 0%    |
| Butanes                                  |        |          | 0%    |        |          | 0%    |       |          | 0%    |
| C5 Hydrocarbons                          |        |          | 0%    |        |          | 0%    |       |          | 0%    |
| C6 Non Aromatics                         |        |          | 0%    |        |          | 0%    |       |          | 0%    |
| C7 Non Aromatics                         |        |          | 0%    |        |          | 0%    |       |          | 0%    |
| C8 Non Aromatics                         |        |          | 0%    |        |          | 0%    |       |          | 0%    |
| Benzene                                  |        |          | 0%    |        |          | 0%    |       |          | 0%    |
| Toluene                                  |        |          | 0%    |        |          | 0%    |       |          | 0%    |
| Xylene/Ethylbenzene                      |        |          | 0%    |        |          | 0%    |       |          | 0%    |
| Styrene                                  |        |          | 0%    |        |          | 0%    |       |          | 0%    |
| C9-204 C                                 |        |          | 0%    |        |          | 0%    |       |          | 0%    |
| 204 - 208 C                              |        |          | 0%    |        |          | 0%    |       |          | 0%    |
| Steam/Water                              |        |          | 0%    |        |          | 0%    |       |          | 0.00% |
| Nitrogen                                 |        |          | 0%    |        |          | 0%    |       |          | 0.00% |
| Naphta                                   |        |          | 0%    |        |          | 0%    |       |          | 0.00% |
|                                          |        |          |       |        |          |       |       |          |       |
| Total Stream Mass Flow Rate (kg/h)       | 36589  | 35550.27 | 2.84% | 36589  | 35550.27 | 2.84% | 27534 | 26593.14 | 3.42% |
| Total Stream Molar Flow Rate (kg mol/hr) | 1173.3 | 1140.617 | 2.79% | 1173.3 | 1140.617 | 2.79% | 882.9 | 853.2314 | 3.36% |
| Stream Mol Weight ( )                    | 31.19  |          | 0.00% | 31.19  |          | 0.00% | 31.19 |          | 0.00% |
| Stream Temperature (°C)                  | -30    | -30      | 0.00% | -72    | -72      | 0.00% | -72   | -72      | 0.00% |
| Stream Pressure (kg/cm <sup>2</sup> (g)) | 22.94  | 22.94    | 0.00% | 22.87  | 22.87    | 0.00% | 22.83 | 22.87    | 0.18% |

# Simulation Report – ECC 860 KTA

## Working Stage 6

---

|                                          | 5220  |          |       | 5221   |          |       |
|------------------------------------------|-------|----------|-------|--------|----------|-------|
| Komponen (mol%)                          | Data  | Simulasi | Galat | Data   | Simulasi | Galat |
| Hydrogen                                 | 0.55  | 0.5332   | 3%    | 0.55   | 0.5332   | 3%    |
| Carbon Monoxide                          |       | 0        | 0%    |        | 0        | 0%    |
| Carbon Dioxide                           |       | 0        | 0%    |        | 0        | 0%    |
| Hydrogen Sulfide                         |       | 0        | 0%    |        | 0        | 0%    |
| Methane                                  | 20.21 | 20.4442  | 1.2%  | 20.21  | 20.4442  | 1%    |
| Acetylene                                |       | 0        | 0.0%  |        | 0        | 0%    |
| Ethylene                                 | 38.6  | 38.3283  | 0.7%  | 38.6   | 38.3283  | 1%    |
| Ethane                                   |       | 0        | 0%    |        | 0        | 0%    |
| Propadiene/Methylacetylene               |       | 0        | 0%    |        | 0        | 0%    |
| Propylene                                | 40.65 | 40.6944  | 0%    | 40.65  | 40.6944  | 0%    |
| Propane                                  |       |          | 0%    |        |          | 0%    |
| Butadiene/C4 Acetylene                   |       |          | 0%    |        |          | 0%    |
| Butylenes                                |       |          | 0%    |        |          | 0%    |
| Butanes                                  |       |          | 0%    |        |          | 0%    |
| C5 Hydrocarbons                          |       |          | 0%    |        |          | 0%    |
| C6 Non Aromatics                         |       |          | 0%    |        |          | 0%    |
| C7 Non Aromatics                         |       |          | 0%    |        |          | 0%    |
| C8 Non Aromatics                         |       |          | 0%    |        |          | 0%    |
| Benzene                                  |       |          | 0%    |        |          | 0%    |
| Toluene                                  |       |          | 0%    |        |          | 0%    |
| Xylene/Ethylbenzene                      |       |          | 0%    |        |          | 0%    |
| Styrene                                  |       |          | 0%    |        |          | 0%    |
| C9-204 C                                 |       |          | 0%    |        |          | 0%    |
| 204 - 208 C                              |       |          | 0%    |        |          | 0%    |
| Steam/Water                              |       |          | 0%    |        |          | 0%    |
| Nitrogen                                 |       |          | 0%    |        |          | 0%    |
| Naphta                                   |       |          | 0%    |        |          | 0%    |
|                                          |       |          |       |        |          |       |
| Total Stream Mass Flow Rate (kg/h)       | 27534 | 26593.14 | 3.42% | 27534  | 26593.14 | 3.42% |
| Total Stream Molar Flow Rate (kg mol/hr) | 882.9 | 853.2314 | 3.36% | 882.9  | 853.2314 | 3.36% |
| Stream Mol Weight ( )                    | 31.19 |          | 0.00% | 31.19  |          | 0.00% |
| Stream Temperature (°C)                  | -132  | -132     | 0.00% | -134.2 | -135.45  | 0.93% |
| Stream Pressure (kg/cm <sup>2</sup> (g)) | 22.66 | 22.66    | 0.00% | 0.82   | 0.82     | 0.00% |

# Simulation Report – ECC 860 KTA

## Working Stage 6

---

| Komponen (mol%)                          | 5222  |          |       | 5223  |          |       |
|------------------------------------------|-------|----------|-------|-------|----------|-------|
|                                          | Data  | Simulasi | Galat | Data  | Simulasi | Galat |
| Hydrogen                                 | 0.55  | 0.5332   | 3%    |       | 0.42     |       |
| Carbon Monoxide                          |       | 0        | 0%    |       | 0.00     | 0%    |
| Carbon Dioxide                           |       | 0        | 0%    |       | 0.00     | 0%    |
| Hydrogen Sulfide                         |       | 0        | 0%    |       | 0.00     | 0%    |
| Methane                                  | 20.21 | 20.4442  | 1%    |       | 16.80    |       |
| Acetylene                                |       | 0        | 0%    |       | 0.00     | 0%    |
| Ethylene                                 | 38.6  | 38.3283  | 1%    |       | 34.55    |       |
| Ethane                                   |       | 0        | 0%    |       | 0.00     | 0%    |
| Propadiene/Methylacetylene               |       | 0        | 0%    |       | 0.00     | 0%    |
| Propylene                                | 40.65 | 40.6944  | 0%    |       | 48.23    |       |
| Propane                                  |       |          | 0%    |       |          | 0%    |
| Butadiene/C4 Acetylene                   |       |          | 0%    |       |          | 0%    |
| Butylenes                                |       |          | 0%    |       |          | 0%    |
| Butanes                                  |       |          | 0%    |       |          | 0%    |
| C5 Hydrocarbons                          |       |          | 0%    |       |          | 0%    |
| C6 Non Aromatics                         |       |          | 0%    |       |          | 0%    |
| C7 Non Aromatics                         |       |          | 0%    |       |          | 0%    |
| C8 Non Aromatics                         |       |          | 0%    |       |          | 0%    |
| Benzene                                  |       |          | 0%    |       |          | 0%    |
| Toluene                                  |       |          | 0%    |       |          | 0%    |
| Xylene/Ethylbenzene                      |       |          | 0%    |       |          | 0%    |
| Styrene                                  |       |          | 0%    |       |          | 0%    |
| C9-204 C                                 |       |          | 0%    |       |          | 0%    |
| 204 - 208 C                              |       |          | 0%    |       |          | 0%    |
| Steam/Water                              |       |          | 0%    |       |          | 0%    |
| Nitrogen                                 |       |          | 0%    |       |          | 0%    |
| Naphta                                   |       |          | 0%    |       |          | 0%    |
|                                          |       |          |       |       |          |       |
| Total Stream Mass Flow Rate (kg/h)       | 27534 | 26593.14 | 3.42% | 48395 | 47480.6  | 2%    |
| Total Stream Molar Flow Rate (kg mol/hr) | 882.9 | 853.2314 | 3.36% |       | 1452.378 |       |
| Stream Mol Weight ( )                    | 31.19 |          | 0.00% |       |          |       |
| Stream Temperature (°C)                  | -43   | -43      | 0.00% | -43.1 | -43.3448 | 1%    |
| Stream Pressure (kg/cm <sup>2</sup> (g)) | 0.54  | 0.54     | 0.00% | 0.54  | 0.54     | 0%    |

# Simulation Report – ECC 860 KTA

## Working Stage 6

|                                          | 5215   |          |       | 5216   |          |       | 5217  |          |       |
|------------------------------------------|--------|----------|-------|--------|----------|-------|-------|----------|-------|
| Komponen (mol%)                          | Data   | Simulasi | Galat | Data   | Simulasi | Galat | Data  | Simulasi | Galat |
| Hydrogen                                 | 0.02   | 0.02     | 0.0%  | 0.02   | 0.02     | 0%    | 0.02  | 0.02     | 0%    |
| Carbon Monoxide                          |        | 0        | 0.0%  |        | 0        | 0%    |       | 0        | 0%    |
| Carbon Dioxide                           |        | 0        | 0.0%  |        | 0        | 0%    |       | 0        | 0%    |
| Hydrogen Sulfide                         |        | 0        | 0.0%  |        | 0        | 0%    |       | 0        | 0%    |
| Methane                                  | 3.34   | 3.4449   | 3.1%  | 3.34   | 3.4449   | 3%    | 3.34  | 3.4449   | 3%    |
| Acetylene                                |        | 0        | 0.0%  |        | 0        | 0%    |       | 0        | 0%    |
| Ethylene                                 | 20.37  | 20.7202  | 1.7%  | 20.37  | 20.7202  | 2%    | 20.37 | 20.7202  | 2%    |
| Ethane                                   |        | 0        | 0.0%  |        | 0        | 0%    |       | 0        | 0%    |
| Propadiene/Methylacetylene               |        | 0        | 0.0%  |        | 0        | 0%    |       | 0        | 0%    |
| Propylene                                | 76.27  | 75.8107  | 0.6%  | 76.27  | 75.8107  | 1%    | 76.27 | 75.8107  | 1%    |
| Propane                                  |        |          | 0%    |        |          | 0%    |       |          | 0%    |
| Butadiene/C4 Acetylene                   |        |          | 0%    |        |          | 0%    |       |          | 0%    |
| Butylenes                                |        |          | 0%    |        |          | 0%    |       |          | 0%    |
| Butanes                                  |        |          | 0%    |        |          | 0%    |       |          | 0%    |
| C5 Hydrocarbons                          |        |          | 0%    |        |          | 0%    |       |          | 0%    |
| C6 Non Aromatics                         |        |          | 0%    |        |          | 0%    |       |          | 0%    |
| C7 Non Aromatics                         |        |          | 0%    |        |          | 0%    |       |          | 0%    |
| C8 Non Aromatics                         |        |          | 0%    |        |          | 0%    |       |          | 0%    |
| Benzene                                  |        |          | 0%    |        |          | 0%    |       |          | 0%    |
| Toluene                                  |        |          | 0%    |        |          | 0%    |       |          | 0%    |
| Xylene/Ethylbenzene                      |        |          | 0%    |        |          | 0%    |       |          | 0%    |
| Styrene                                  |        |          | 0%    |        |          | 0%    |       |          | 0%    |
| C9-204 C                                 |        |          | 0%    |        |          | 0%    |       |          | 0.00% |
| 204 - 208 C                              |        |          | 0%    |        |          | 0%    |       |          | 0.00% |
| Steam/Water                              |        |          | 0%    |        |          | 0%    |       |          | 0%    |
| Nitrogen                                 |        |          | 0%    |        |          | 0%    |       |          | 0%    |
| Naphta                                   |        |          | 0%    |        |          | 0.00% |       |          | 0.00% |
|                                          |        |          |       |        |          |       |       |          |       |
| Total Stream Mass Flow Rate (kg/h)       | 97841  | 98879.73 | 1.06% | 86036  | 86949.4  | 1.06% | 11805 | 11930.33 | 1.06% |
| Total Stream Molar Flow Rate (kg mol/hr) | 2551.4 | 2583.904 | 1.27% | 2243.6 | 2272.143 | 1.27% | 307.8 | 311.7607 | 1.29% |
| Stream Mol Weight ( )                    | 38.35  |          | 0.00% | 38.35  |          | 0.00% | 38.35 |          | 0.00% |
| Stream Temperature (°C)                  | 17.9   | 17.98269 | 0.46% | -30    | -30      | 0.00% | -30   | -30      | 0.00% |
| Stream Pressure (kg/cm² (g))             | 23.08  | 23.08    | 0.00% | 22.94  | 22.94    | 0.00% | 22.94 | 22.94    | 0.00% |

# Simulation Report – ECC 860 KTA

## Working Stage 6

---

| Komponen (mol%)                          | 5218  |          |       | 5219  |          |       |
|------------------------------------------|-------|----------|-------|-------|----------|-------|
|                                          | Data  | Simulasi | Galat | Data  | Simulasi | Galat |
| Hydrogen                                 | 0.02  | 0.02     | 0%    | 0.02  | 0.02     | 0%    |
| Carbon Monoxide                          |       | 0        | 0%    |       | 0        | 0%    |
| Carbon Dioxide                           |       | 0        | 0%    |       | 0        | 0%    |
| Hydrogen Sulfide                         |       | 0        | 0%    |       | 0        | 0%    |
| Methane                                  | 3.34  | 3.4449   | 3%    | 3.34  | 3.4449   | 3%    |
| Acetylene                                |       | 0        | 0%    |       | 0        | 0%    |
| Ethylene                                 | 20.37 | 20.7202  | 2%    | 20.37 | 20.7202  | 2%    |
| Ethane                                   |       | 0        | 0%    |       | 0        | 0%    |
| Propadiene/Methylacetylene               |       | 0        | 0%    |       | 0        | 0%    |
| Propylene                                | 76.27 | 75.8107  | 1%    | 76.27 | 75.8107  | 1%    |
| Propane                                  |       |          | 0%    |       |          | 0%    |
| Butadiene/C4 Acetylene                   |       |          | 0%    |       |          | 0%    |
| Butylenes                                |       |          | 0%    |       |          | 0%    |
| Butanes                                  |       |          | 0%    |       |          | 0%    |
| C5 Hydrocarbons                          |       |          | 0%    |       |          | 0%    |
| C6 Non Aromatics                         |       |          | 0%    |       |          | 0%    |
| C7 Non Aromatics                         |       |          | 0%    |       |          | 0%    |
| C8 Non Aromatics                         |       |          | 0%    |       |          | 0%    |
| Benzene                                  |       |          | 0%    |       |          | 0%    |
| Toluene                                  |       |          | 0%    |       |          | 0%    |
| Xylene/Ethylbenzene                      |       |          | 0%    |       |          | 0%    |
| Styrene                                  |       |          | 0%    |       |          | 0%    |
| C9-204 C                                 |       |          | 0%    |       |          | 0%    |
| 204 - 208 C                              |       |          | 0%    |       |          | 0%    |
| Steam/Water                              |       |          | 0%    |       |          | 0%    |
| Nitrogen                                 |       |          | 0%    |       |          | 0%    |
| Naphta                                   |       |          | 0%    |       |          | 0%    |
|                                          |       |          |       |       |          |       |
| Total Stream Mass Flow Rate (kg/h)       | 11805 | 11930.33 | 1.06% | 11805 | 11930.33 | 1.06% |
| Total Stream Molar Flow Rate (kg mol/hr) | 307.8 | 311.7607 | 1.29% | 307.8 | 311.7607 | 1.29% |
| Stream Mol Weight ( )                    | 38.35 |          | 0.00% | 38.35 |          | 0.00% |
| Stream Temperature (°C)                  | -72   | -72      | 0.00% | -43   | -43      | 0.00% |
| Stream Pressure (kg/cm <sup>2</sup> (g)) | 22.87 | 22.87    | 0.00% | 0.54  | 0.54     | 0.00% |

# Simulation Report – ECC 860 KTA

## Working Stage 6

|                                          | 5250  |          |       | 5251  |          |       | 5252  |          |       |
|------------------------------------------|-------|----------|-------|-------|----------|-------|-------|----------|-------|
| Komponen (mol%)                          | Data  | Simulasi | Galat | Data  | Simulasi | Galat | Data  | Simulasi | Galat |
| Hydrogen                                 | 0.55  | 0.5332   | 3.05% | 0.55  | 0.5332   | 3%    | 0.55  | 0.5332   | 3%    |
| Carbon Monoxide                          |       | 0        | 0.00% |       | 0        | 0%    |       | 0        | 0%    |
| Carbon Dioxide                           |       | 0        | 0.00% |       | 0        | 0%    |       | 0        | 0%    |
| Hydrogen Sulfide                         |       | 0        | 0.00% |       | 0        | 0%    |       | 0        | 0%    |
| Methane                                  | 20.21 | 20.4442  | 1.16% | 20.21 | 20.4442  | 1%    | 20.21 | 20.4442  | 1%    |
| Acetylene                                |       | 0        | 0.00% |       | 0        | 0%    |       | 0        | 0%    |
| Ethylene                                 | 38.6  | 38.3283  | 0.70% | 38.6  | 38.3283  | 1%    | 38.6  | 38.3283  | 1%    |
| Ethane                                   |       | 0        | 0.00% |       | 0        | 0%    |       | 0        | 0%    |
| Propadiene/Methylacetylene               |       | 0        | 0.00% |       | 0        | 0%    |       | 0        | 0%    |
| Propylene                                | 40.65 | 40.6944  | 0.11% | 40.65 | 40.6944  | 0%    | 40.65 | 40.6944  | 0%    |
| Propane                                  |       |          | 0%    |       |          | 0%    |       |          | 0%    |
| Butadiene/C4 Acetylene                   |       |          | 0%    |       |          | 0%    |       |          | 0%    |
| Butylenes                                |       |          | 0%    |       |          | 0%    |       |          | 0%    |
| Butanes                                  |       |          | 0%    |       |          | 0%    |       |          | 0%    |
| C5 Hydrocarbons                          |       |          | 0%    |       |          | 0%    |       |          | 0%    |
| C6 Non Aromatics                         |       |          | 0%    |       |          | 0%    |       |          | 0%    |
| C7 Non Aromatics                         |       |          | 0%    |       |          | 0%    |       |          | 0%    |
| C8 Non Aromatics                         |       |          | 0%    |       |          | 0%    |       |          | 0%    |
| Benzene                                  |       |          | 0%    |       |          | 0%    |       |          | 0%    |
| Toluene                                  |       |          | 0%    |       |          | 0%    |       |          | 0%    |
| Xylene/Ethylbenzene                      |       |          | 0%    |       |          | 0%    |       |          | 0%    |
| Styrene                                  |       |          | 0%    |       |          | 0%    |       |          | 0%    |
| C9-204 C                                 |       |          | 0%    |       |          | 0%    |       |          | 0%    |
| 204 - 208 C                              |       |          | 0%    |       |          | 0%    |       |          | 0%    |
| Steam/Water                              |       |          | 0.00% |       |          | 0%    |       |          | 0%    |
| Nitrogen                                 |       |          | 0%    |       |          | 0%    |       |          | 0%    |
| Naphta                                   |       |          | 0.00% |       |          | 0%    |       |          | 0%    |
|                                          |       |          |       |       |          |       |       |          |       |
| Total Stream Mass Flow Rate (kg/h)       | 9056  | 8957.123 | 1.09% | 9056  | 8957.123 | 1.09% | 9056  | 8957.123 | 1.09% |
| Total Stream Molar Flow Rate (kg mol/hr) | 290.4 | 287.3861 | 1.04% | 290.4 | 287.3861 | 1.04% | 290.4 | 287.3861 | 1.04% |
| Stream Mol Weight ( )                    | 31.19 |          | 0.00% | 31.19 |          | 0.00% | 31.19 |          | 0.00% |
| Stream Temperature (°C)                  | -72   | -72      | 0.00% | -99   | -99      | 0.00% | -44.4 | -44.4    | 0.00% |
| Stream Pressure (kg/cm <sup>2</sup> (g)) | 22.83 | 22.87    | 0.18% | 22.55 | 22.55    | 0.00% | 0.68  | 0.68     | 0.00% |

# Simulation Report – ECC 860 KTA

## Working Stage 6

|                                          | 5228   |          |       | 5229   |          |       | 5230   |          |       |
|------------------------------------------|--------|----------|-------|--------|----------|-------|--------|----------|-------|
| Komponen (mol%)                          | Data   | Simulasi | Galat | Data   | Simulasi | Galat | Data   | Simulasi | Galat |
| Hydrogen                                 | 0.01   | 0.01     | 0.00% | 0.01   | 0.01     | 0.00% | 0.01   | 0.01     | 0.00% |
| Carbon Monoxide                          |        | 0        | 0.00% |        | 0        | 0.00% |        | 0        | 0.00% |
| Carbon Dioxide                           |        | 0        | 0.00% |        | 0        | 0.00% |        | 0        | 0.00% |
| Hydrogen Sulfide                         |        | 0        | 0.00% |        | 0        | 0.00% |        | 0        | 0.00% |
| Methane                                  | 1.39   | 1.39     | 0.00% | 1.39   | 1.39     | 0.00% | 1.39   | 1.39     | 0.00% |
| Acetylene                                |        | 0        | 0.00% |        | 0        | 0.00% |        | 0        | 0.00% |
| Ethylene                                 | 11.48  | 11.4802  | 0.00% | 11.48  | 11.4802  | 0.00% | 11.48  | 11.4802  | 0.00% |
| Ethane                                   |        | 0        | 0.00% |        | 0        | 0.00% |        | 0        | 0.00% |
| Propadiene/Methylacetylene               |        | 0        | 0.00% |        | 0        | 0.00% |        | 0        | 0.00% |
| Propylene                                | 87.12  | 87.1216  | 0.00% | 87.12  | 87.1216  | 0.00% | 87.12  | 87.1216  | 0.00% |
| Propane                                  |        |          | 0.00% |        |          | 0.00% |        |          | 0.00% |
| Butadiene/C4 Acetylene                   |        |          | 0.00% |        |          | 0.00% |        |          | 0.00% |
| Butylenes                                |        |          | 0.00% |        |          | 0.00% |        |          | 0.00% |
| Butanes                                  |        |          | 0.00% |        |          | 0.00% |        |          | 0.00% |
| C5 Hydrocarbons                          |        |          | 0.00% |        |          | 0.00% |        |          | 0.00% |
| C6 Non Aromatics                         |        |          | 0.00% |        |          | 0.00% |        |          | 0.00% |
| C7 Non Aromatics                         |        |          | 0.00% |        |          | 0.00% |        |          | 0.00% |
| C8 Non Aromatics                         |        |          | 0.00% |        |          | 0.00% |        |          | 0.00% |
| Benzene                                  |        |          | 0.00% |        |          | 0.00% |        |          | 0.00% |
| Toluene                                  |        |          | 0.00% |        |          | 0.00% |        |          | 0.00% |
| Xylene/Ethylbenzene                      |        |          | 0.00% |        |          | 0.00% |        |          | 0.00% |
| Styrene                                  |        |          | 0.00% |        |          | 0.00% |        |          | 0.00% |
| C9-204 C                                 |        |          | 0.00% |        |          | 0.00% |        |          | 0.00% |
| 204 - 208 C                              |        |          | 0.00% |        |          | 0.00% |        |          | 0.00% |
| Steam/Water                              |        |          | 0.00% |        |          | 0.00% |        |          | 0.00% |
| Nitrogen                                 |        |          | 0.00% |        |          | 0.00% |        |          | 0.00% |
| Naphta                                   |        |          |       |        |          |       |        |          |       |
|                                          |        |          |       |        |          |       |        |          |       |
| Total Stream Mass Flow Rate (kg/h)       | 192097 | 192097   | 0.00% | 52084  | 49202.15 | 5.53% | 52084  | 49202.15 | 5.53% |
| Total Stream Molar Flow Rate (kg mol/hr) | 4789.7 | 4792.5   | 0.06% | 1298.6 | 1226.83  | 5.53% | 1298.6 | 1226.83  | 5.53% |
| Stream Mol Weight ( )                    | 40.11  |          | 0.00% | 40.11  |          | 0.00% | 40.11  |          | 0.00% |
| Stream Temperature (°C)                  | 7.4    | 7.4      | 0.00% | -30    | -30      | 0.00% | 35     | 35       | 0.00% |
| Stream Pressure (kg/cm <sup>2</sup> (g)) | 23.24  | 23.24    | 0.00% | 23.1   | 23.1     | 0.00% | 6.83   | 6.83     | 0.00% |



# Simulation Report – ECC 860 KTA

## Working Stage 6

| 5231                                     |        |          |       | 5232   |          |        | 5235   |          |       |
|------------------------------------------|--------|----------|-------|--------|----------|--------|--------|----------|-------|
| Komponen (mol%)                          | Data   | Simulasi | Galat | Data   | Simulasi | Galat  | Data   | Simulasi | Galat |
| Hydrogen                                 | 0.02   | 0.02     | 0.00% | 0.01   | 0.0185   | 85.00% | 0.01   | 0.01     | 0.00% |
| Carbon Monoxide                          |        | 0        | 0.00% |        | 0        | 0.00%  |        | 0        | 0.00% |
| Carbon Dioxide                           |        | 0        | 0.00% |        | 0        | 0.00%  |        | 0        | 0.00% |
| Hydrogen Sulfide                         |        | 0        | 0.00% |        | 0        | 0.00%  |        | 0        | 0.00% |
| Methane                                  | 3.34   | 3.4449   | 3.14% | 2.62   | 2.718    | 3.74%  | 1.39   | 1.39     | 0.00% |
| Acetylene                                |        | 0        | 0.00% |        | 0        | 0.00%  |        | 0        | 0.00% |
| Ethylene                                 | 20.37  | 20.7202  | 1.72% | 17.11  | 17.4516  | 2.00%  | 11.48  | 11.4802  | 0.00% |
| Ethane                                   |        | 0        | 0.00% |        | 0        | 0.00%  |        | 0        | 0.00% |
| Propadiene/Methylacetylene               |        | 0        | 0.00% |        | 0        | 0.00%  |        | 0        | 0.00% |
| Propylene                                | 76.27  | 75.8107  | 0.60% | 80.25  | 79.812   | 0.55%  | 87.12  | 87.1216  | 0.00% |
| Propane                                  |        |          | 0.00% |        |          | 0.00%  |        |          | 0.00% |
| Butadiene/C4 Acetylene                   |        |          | 0.00% |        |          | 0.00%  |        |          | 0.00% |
| Butylenes                                |        |          | 0.00% |        |          | 0.00%  |        |          | 0.00% |
| Butanes                                  |        |          | 0.00% |        |          | 0.00%  |        |          | 0.00% |
| C5 Hydrocarbons                          |        |          | 0.00% |        |          | 0.00%  |        |          | 0.00% |
| C6 Non Aromatics                         |        |          | 0.00% |        |          | 0.00%  |        |          | 0.00% |
| C7 Non Aromatics                         |        |          | 0.00% |        |          | 0.00%  |        |          | 0.00% |
| C8 Non Aromatics                         |        |          | 0.00% |        |          | 0.00%  |        |          | 0.00% |
| Benzene                                  |        |          | 0.00% |        |          | 0.00%  |        |          | 0.00% |
| Toluene                                  |        |          | 0.00% |        |          | 0.00%  |        |          | 0.00% |
| Xylene/Ethylbenzene                      |        |          | 0.00% |        |          | 0.00%  |        |          | 0.00% |
| Styrene                                  |        |          | 0.00% |        |          | 0.00%  |        |          | 0.00% |
| C9-204 C                                 |        |          | 0.00% |        |          | 0.00%  |        |          | 0.00% |
| 204 - 208 C                              |        |          | 0.00% |        |          | 0.00%  |        |          | 0.00% |
| Steam/Water                              |        |          | 0.00% |        |          | 0.00%  |        |          | 0.00% |
| Nitrogen                                 |        |          | 0.00% |        |          | 0.00%  |        |          | 0.00% |
| Naphta                                   |        |          |       |        |          |        |        |          |       |
|                                          |        |          |       |        |          |        |        |          |       |
| Total Stream Mass Flow Rate (kg/h)       | 86036  | 86949.4  | 1.06% | 138120 | 136151.6 | 1.43%  | 140013 | 143001.5 | 2.13% |
| Total Stream Molar Flow Rate (kg mol/hr) | 2243.6 | 2272.143 | 1.27% | 3542.2 | 3498.973 | 1.22%  | 3491   | 3565.67  | 2.14% |
| Stream Mol Weight ( )                    | 38.35  |          | 0.00% | 38.99  |          | 0.00%  | 40.11  |          | 0.00% |
| Stream Temperature (°C)                  | 35     | 35       | 0.00% | 35     | 34.99386 | 0.02%  | -30    | -30      | 0.00% |
| Stream Pressure (kg/cm <sup>2</sup> (g)) | 6.83   | 6.83     | 0.00% | 6.83   | 6.83     | 0.00%  | 23.1   | 23.1     | 0.00% |

### A.5. Stage 3

**Table A.3.1. Stage 3 Stream Properties**

# Simulation Report – ECC 860 KTA

## Working Stage 6

| Component Properties             | 4744       |        |         | 4144       |        |        | 4143       |        |        |
|----------------------------------|------------|--------|---------|------------|--------|--------|------------|--------|--------|
|                                  | Simulation | Design | %Error  | Simulation | Design | %Error | Simulation | Design | %Error |
| Hydrogen                         | 0.0335     | 0.0335 | 0       | 0.0335     | 0.0335 | 0      | 0.02       | 0.02   | 0      |
| Carbon Monoxide                  | 0.0018     | 0.0018 | 0       | 0.0018     | 0.0018 | 0      | 0.0007     | 0.0007 | 0      |
| Carbon Dioxide                   |            |        |         |            |        |        |            |        |        |
| Hydrogen Sulfide                 |            |        |         |            |        |        |            |        |        |
| Methane                          | 0.8268     | 0.8266 | 0.02    | 0.8267     | 0.8265 | 0.02   | 0.4421     | 0.4421 | 0      |
| Acetylene                        | 0.0021     | 0.0021 | 0       | 0.0021     | 0.0021 | 0      | 0.0077     | 0.0077 | 0      |
| Ethylene                         | 0.1268     | 0.1268 | 0       | 0.1269     | 0.1269 | 0      | 0.4471     | 0.4471 | 0      |
| Ethane                           | 0.0081     | 0.0081 | 0       | 0.0081     | 0.0081 | 0      | 0.0556     | 0.0556 | 0      |
| Propadiene/Methylacetylene       |            |        |         |            |        |        | 0.0005     | 0.0005 | 0      |
| Propylene                        | 0.0005     | 0.0005 | 0       | 0.0005     | 0.0005 | 0      | 0.0242     | 0.0242 | 0      |
| Propane                          |            |        |         |            |        |        | 0.0006     | 0.0006 | 0      |
| Butadiene/C4 Acetylene           |            |        |         |            |        |        | 0.0005     | 0.0005 | 0      |
| Butylenes                        |            |        |         |            |        |        | 0.0007     | 0.0007 | 0      |
| Butanes                          |            |        |         |            |        |        | 0.0002     | 0.0002 | 0      |
| C5 Hydrocarbons                  |            |        |         |            |        |        |            |        |        |
| C6 Non Aromatics                 |            |        |         |            |        |        |            |        |        |
| C7 Non Aromatics                 |            |        |         |            |        |        |            |        |        |
| C8 Non Aromatics                 |            |        |         |            |        |        |            |        |        |
| Benzene                          |            |        |         |            |        |        |            |        |        |
| Toluene                          |            |        |         |            |        |        |            |        |        |
| Xylene/Ethylbenzene              |            |        |         |            |        |        |            |        |        |
| Styrene                          |            |        |         |            |        |        |            |        |        |
| C9                               |            |        |         |            |        |        |            |        |        |
| 204 288 C (PGO)                  |            |        |         |            |        |        |            |        |        |
| 288 C Plus (PFO)                 |            |        |         |            |        |        |            |        |        |
| Steam/Water                      |            |        |         |            |        |        |            |        |        |
| Nitrogen                         | 0.0004     | 0.0004 | 0       | 0.0004     | 0.0004 | 0      | 0.0002     | 0.0002 | 0      |
| Naptha                           |            |        |         |            |        |        |            |        |        |
| Mass Flow (kg/h)                 | 4824       | 4824   | 0       | 13662      | 13662  | 0      | 9852       | 9852   | 0      |
| Molar Flow (kmole/h)             | 279.3253   | 279.3  | 0.00906 | 791.0193   | 791    | 0.0024 | 433.7443   | 433.8  | 0.01   |
| Temperature (°C)                 | -138.3     | -138.3 | 0       | -138.3     | -138.3 | 0      | -115.5     | -115.5 | 0      |
| Pressure (kg/cm <sup>2</sup> _g) | 5.53       | 5.53   | 0       | 5.53       | 5.53   | 0      | 5.55       | 5.55   | 0      |
| Component Properties             | 4703       |        |         | 4707       |        |        | 4104       |        |        |
|                                  | Simulation | Design | %Error  | Simulation | Design | %Error | Simulation | Design | %Error |
| Hydrogen                         | 0.1797     | 0.1797 | 0.01    | 0.1797     | 0.1797 | 0.01   | 0.1797     | 0.1797 | 0.01   |
| Carbon Monoxide                  | 0.0011     | 0.0011 | 0.01    | 0.0011     | 0.0011 | 0.01   | 0.0011     | 0.0011 | 0.01   |
| Carbon Dioxide                   |            |        |         |            |        |        |            |        |        |
| Hydrogen Sulfide                 |            |        |         |            |        |        |            |        |        |
| Methane                          | 0.2996     | 0.2996 | 0.01    | 0.2996     | 0.2996 | 0.01   | 0.2996     | 0.2996 | 0.01   |
| Acetylene                        | 0.0058     | 0.0058 | 0.01    | 0.0058     | 0.0058 | 0.01   | 0.0058     | 0.0058 | 0.01   |
| Ethylene                         | 0.3142     | 0.3142 | 0.01    | 0.3142     | 0.3142 | 0.01   | 0.3142     | 0.3142 | 0.01   |
| Ethane                           | 0.0549     | 0.0549 | 0.01    | 0.0549     | 0.0549 | 0.01   | 0.0549     | 0.0549 | 0.01   |
| Propadiene/Methylacetylene       | 0.0042     | 0.0042 | 0       | 0.0042     | 0.0042 | 0      | 0.0042     | 0.0042 | 0.01   |
| Propylene                        | 0.1027     | 0.1027 | 0.01    | 0.1027     | 0.1027 | 0.01   | 0.1027     | 0.1027 | 0.01   |
| Propane                          | 0.0031     | 0.0031 | 0.01    | 0.0031     | 0.0031 | 0      | 0.0031     | 0.0031 | 0.01   |
| Butadiene/C4 Acetylene           | 0.0112     | 0.0112 | 0.01    | 0.0112     | 0.0112 | 0      | 0.0112     | 0.0112 | 0.01   |
| Butylenes                        | 0.016      | 0.016  | 0.01    | 0.016      | 0.016  | 0      | 0.016      | 0.016  | 0.01   |
| Butanes                          | 0.0051     | 0.0051 | 0.01    | 0.0051     | 0.0051 | 0      | 0.0051     | 0.0051 | 0.01   |
| C5 Hydrocarbons                  | 0.0018     | 0.0018 | 0.01    | 0.0018     | 0.0018 | 0      | 0.0018     | 0.0018 | 0      |
| C6 Non Aromatics                 |            |        |         |            |        |        |            |        |        |
| C7 Non Aromatics                 |            |        |         |            |        |        |            |        |        |
| C8 Non Aromatics                 |            |        |         |            |        |        |            |        |        |
| Benzene                          | 0.0002     | 0.0002 | 0.01    | 0.0002     | 0.0002 | 0      | 0.0002     | 0.0002 | 0      |
| Toluene                          |            |        |         |            |        |        |            |        |        |

# Simulation Report – ECC 860 KTA

## Working Stage 6

|                                  |            |        |        |            |        |        |            |        |        |
|----------------------------------|------------|--------|--------|------------|--------|--------|------------|--------|--------|
| Xylene/Ethylbenzene              |            |        |        |            |        |        |            |        |        |
| Styrene                          |            |        |        |            |        |        |            |        |        |
| C9                               |            |        |        |            |        |        |            |        |        |
| 204 288 C (PGO)                  |            |        |        |            |        |        |            |        |        |
| 288 C Plus (PFO)                 |            |        |        |            |        |        |            |        |        |
| Steam/Water                      |            |        |        |            |        |        |            |        |        |
| Nitrogen                         | 0.0003     | 0.0003 | 0      | 0.0003     | 0.0003 | 0      | 0.0003     | 0.0003 | 0      |
| Naphtha                          |            |        |        |            |        |        |            |        |        |
| Mass Flow (kg/h)                 | 65371      | 65371  | 0      | 65371      | 65371  | 0      | 185000     | 185000 | 0      |
| Molar Flow (kmole/h)             | 2918.521   | 2918.3 | 0.01   | 2918.521   | 2918.3 | 0.0076 | 8259.418   | 8258.8 | 0.0075 |
| Temperature (°C)                 | -21.507    | -21.6  | 0.43   | -34.7866   | -35.9  | 3.1013 | -36.5      | -36.5  | 0      |
| Pressure (kg/cm <sup>2</sup> _g) | 35.56      | 35.56  | 0      | 34.93      | 34.93  | 0      | 35.69      | 35.69  | 0      |
| Component Properties             | 4167       |        |        | 4175       |        |        | 4756       |        |        |
|                                  | Simulation | Design | %Error | Simulation | Design | %Error | Simulation | Design | %Error |
| Hydrogen                         | 0.0526     | 0.0526 | 0.01   | 0.0556     | 0.0557 | 0.1547 |            |        |        |
| Carbon Monoxide                  | 0.0019     | 0.0019 | 0.01   | 0.0018     | 0.0019 | 3.1437 |            |        |        |
| Carbon Dioxide                   |            |        |        |            |        |        |            |        |        |
| Hydrogen Sulfide                 |            |        |        |            |        |        |            |        |        |
| Methane                          | 0.9413     | 0.9414 | 0.01   | 0.9259     | 0.938  | 1.2862 | 0.0001     | 0.0001 | 0.01   |
| Acetylene                        | 0.0001     | 0.0001 | 0.01   | 0.0001     | 0.0001 | 10.436 | 0.0109     | 0.0109 | 0.01   |
| Ethylene                         | 0.0037     | 0.0037 | 0.01   | 0.0158     | 0.0039 | 305.91 | 0.609      | 0.6091 | 0.01   |
| Ethane                           |            |        |        |            |        |        | 0.1047     | 0.1047 | 0.01   |
| Propadiene/Methylacetylene       |            |        |        |            |        |        | 0.0081     | 0.0081 | 0.01   |
| Propylene                        |            |        |        |            |        |        | 0.1958     | 0.1958 | 0.01   |
| Propane                          |            |        |        |            |        |        | 0.0059     | 0.0059 | 0.01   |
| Butadiene/C4 Acetylene           |            |        |        |            |        |        | 0.0214     | 0.0214 | 0.01   |
| Butylenes                        |            |        |        |            |        |        | 0.0305     | 0.0305 | 0.01   |
| Butanes                          |            |        |        |            |        |        | 0.0096     | 0.0096 | 0.01   |
| C5 Hydrocarbons                  |            |        |        |            |        |        | 0.0035     | 0.0035 | 0.01   |
| C6 Non Aromatics                 |            |        |        |            |        |        | 0.0001     | 0.0001 | 0.01   |
| C7 Non Aromatics                 |            |        |        |            |        |        |            |        |        |
| C8 Non Aromatics                 |            |        |        |            |        |        |            |        |        |
| Benzene                          |            |        |        |            |        |        | 0.0004     | 0.0004 | 0.01   |
| Toluene                          |            |        |        |            |        |        |            |        |        |
| Xylene/Ethylbenzene              |            |        |        |            |        |        |            |        |        |
| Styrene                          |            |        |        |            |        |        |            |        |        |
| C9                               |            |        |        |            |        |        |            |        |        |
| 204 288 C (PGO)                  |            |        |        |            |        |        |            |        |        |
| 288 C Plus (PFO)                 |            |        |        |            |        |        |            |        |        |
| Steam/Water                      |            |        |        |            |        |        |            |        |        |
| Nitrogen                         | 0.0004     | 0.0004 | 0      | 0.0004     | 0.0004 | 0      |            |        |        |
| Naphtha                          |            |        |        |            |        |        |            |        |        |
| Mass Flow (kg/h)                 | 32350      | 32350  | 0      | 7913       | 7913   | 0      | 50228      | 50228  | 0      |
| Molar Flow (kmole/h)             | 2103.6383  | 2103.6 | 0      | 511.0234   | 515.9  | 0.95   | 1519.257   | 1519.7 | 0.03   |
| Temperature (°C)                 | -134.9     | -134.9 | 0      | 85.6435    | 85.7   | 0.07   | -50.9      | -50.9  | 0      |
| Pressure (kg/cm <sup>2</sup> _g) | 5.46       | 5.46   | 0      | 21.1       | 21.1   | 0      | 27.9       | 27.9   | 0      |
| Component Properties             | 4767       |        |        | 4141       |        |        | 4319       |        |        |
|                                  | Simulation | Design | %Error | Simulation | Design | %Error | Simulation | Design | %Error |
| Hydrogen                         | 0.05       | 0.05   | 0.68   | 0.0131     | 0.0131 | 0      | 0.0118     | 0.0118 | 0.0101 |
| Carbon Monoxide                  | 0          | 0.00   | 2.43   | 0.0004     | 0.0004 | 0      | 0.0002     | 0.0002 | 0.010  |

# Simulation Report – ECC 860 KTA

## Working Stage 6

|                                  |            |        |        |            |        |        |            |        |        |
|----------------------------------|------------|--------|--------|------------|--------|--------|------------|--------|--------|
|                                  |            |        |        |            |        |        |            |        | 1      |
| Carbon Dioxide                   |            |        |        |            |        |        |            |        |        |
| Hydrogen Sulfide                 |            |        |        |            |        |        |            |        |        |
| Methane                          | 0.93       | 0.95   | 1.92   | 0.2316     | 0.2316 | 0      | 0.0084     | 0.0084 | 0.0001 |
| Acetylene                        | 0          | 0.00   | 14.84  | 0.0081     | 0.0081 | 0      |            |        |        |
| Ethylene                         | 0.02       | 0.00   | 502.85 | 0.4397     | 0.4397 | 0      | 0.9794     | 0.9795 | 0.0101 |
| Ethane                           |            |        |        | 0.081      | 0.081  | 0      | 0.0002     | 0.0002 | 0.0001 |
| Propadiene/Methylacetylene       |            |        |        | 0.0066     | 0.0066 | 0      |            |        |        |
| Propylene                        |            |        |        | 0.1603     | 0.1603 | 0      |            |        |        |
| Propane                          |            |        |        | 0.0048     | 0.0048 | 0      |            |        |        |
| Butadiene/C4 Acetylene           |            |        |        | 0.0177     | 0.0177 | 0      |            |        |        |
| Butylenes                        |            |        |        | 0.0253     | 0.0253 | 0      |            |        |        |
| Butanes                          |            |        |        | 0.008      | 0.008  | 0      |            |        |        |
| C5 Hydrocarbons                  |            |        |        | 0.0029     | 0.0029 | 0      |            |        |        |
| C6 Non Aromatics                 |            |        |        | 0.0001     | 0.0001 | 0      |            |        |        |
| C7 Non Aromatics                 |            |        |        |            |        |        |            |        |        |
| C8 Non Aromatics                 |            |        |        |            |        |        |            |        |        |
| Benzene                          |            |        |        | 0.0003     | 0.0003 | 0      |            |        |        |
| Toluene                          |            |        |        |            |        |        |            |        |        |
| Xylene/Ethylbenzene              |            |        |        |            |        |        |            |        |        |
| Styrene                          |            |        |        |            |        |        |            |        |        |
| C9                               |            |        |        |            |        |        |            |        |        |
| 204 288 C (PGO)                  |            |        |        |            |        |        |            |        |        |
| 288 C Plus (PFO)                 |            |        |        |            |        |        |            |        |        |
| Steam/Water                      |            |        |        |            |        |        |            |        |        |
| Nitrogen                         | 0          | 0.00   | 5.76   | 0.0001     | 0.0001 | 0      | 0          | 0      | 0      |
| Naphtha                          |            |        |        |            |        |        |            |        |        |
| Mass Flow (kg/h)                 | 13053      | 13053  | 0      | 75849      | 75849  | 0      | 2093       | 2093   | 0      |
| Molar Flow (kmole/h)             | 832.6107   | 844.8  | 1.44   | 2611.6807  | 2612.7 | 0.04   | 75.7069    | 75.7   | 0.01   |
| Temperature (°C)                 | -124.1082  | -132.7 | 6.47   | -77.9      | -77.9  | 0      | -57.8      | -57.8  | 0      |
| Pressure (kg/cm <sup>2</sup> _g) | 5.51       | 5.51   | 0      | 5.61       | 5.61   | 0      | 5.97       | 5.97   | 0      |
| Component Properties             | 4166       |        |        | 4168       |        |        | 4169       |        |        |
|                                  | Simulation | Design | %Error | Simulation | Design | %Error | Simulation | Design | %Error |
| Hydrogen                         | 0.05       | 0.05   | 0.68   | 0.05       | 0.05   | 0.68   | 0.05       | 0.05   | 0.68   |
| Carbon Monoxide                  | 0          | 0.00   | 2.43   | 0          | 0.00   | 2.43   | 0          | 0.00   | 2.43   |
| Carbon Dioxide                   |            |        |        |            |        |        |            |        |        |
| Hydrogen Sulfide                 |            |        |        |            |        |        |            |        |        |
| Methane                          | 0.93       | 0.95   | 1.92   | 0.93       | 0.95   | 1.92   | 0.93       | 0.95   | 1.92   |
| Acetylene                        | 0          | 0.00   | 14.84  | 0          | 0.00   | 14.84  | 0          | 0.00   | 14.84  |
| Ethylene                         | 0.02       | 0.00   | 502.85 | 0.02       | 0.00   | 502.85 | 0.02       | 0.00   | 502.85 |
| Ethane                           |            |        |        |            |        |        |            |        |        |
| Propadiene/Methylacetylene       |            |        |        |            |        |        |            |        |        |
| Propylene                        |            |        |        |            |        |        |            |        |        |
| Propane                          |            |        |        |            |        |        |            |        |        |
| Butadiene/C4 Acetylene           |            |        |        |            |        |        |            |        |        |
| Butylenes                        |            |        |        |            |        |        |            |        |        |
| Butanes                          |            |        |        |            |        |        |            |        |        |
| C5 Hydrocarbons                  |            |        |        |            |        |        |            |        |        |
| C6 Non Aromatics                 |            |        |        |            |        |        |            |        |        |
| C7 Non Aromatics                 |            |        |        |            |        |        |            |        |        |
| C8 Non Aromatics                 |            |        |        |            |        |        |            |        |        |
| Benzene                          |            |        |        |            |        |        |            |        |        |
| Toluene                          |            |        |        |            |        |        |            |        |        |
| Xylene/Ethylbenzene              |            |        |        |            |        |        |            |        |        |
| Styrene                          |            |        |        |            |        |        |            |        |        |

# Simulation Report – ECC 860 KTA

## Working Stage 6

|                                  |            |        |        |            |        |        |            |        |        |
|----------------------------------|------------|--------|--------|------------|--------|--------|------------|--------|--------|
| C9                               |            |        |        |            |        |        |            |        |        |
| 204 288 C (PGO)                  |            |        |        |            |        |        |            |        |        |
| 288 C Plus (PFO)                 |            |        |        |            |        |        |            |        |        |
| Steam/Water                      |            |        |        |            |        |        |            |        |        |
| Nitrogen                         | 0.04       | 0.04   | 0      | 0.04       | 0.04   | 0      | 0.04       | 0.04   | 0      |
| Naphtha                          |            |        |        |            |        |        |            |        |        |
| Mass Flow (kg/h)                 | 48217.5058 | 47553  | 1.4    | 15735      | 15735  | 0      | 15735      | 15735  | 0      |
| Molar Flow (kmole/h)             | 3075.6464  | 3077.8 | 0.07   | 1003.6873  | 1018.4 | 1.44   | 1003.687   | 1018.4 | 1.44   |
| Temperature (°C)                 | -124.1082  | -132.7 | 6.47   | -124.1082  | -132.7 | 6.47   | 38         | 38     | 0      |
| Pressure (kg/cm <sup>2</sup> _g) | 5.51       | 5.51   | 0      | 5.51       | 5.51   | 0      | 5.34       | 5.34   | 0      |
| Component Properties             | 4142       |        |        | 4742       |        |        | 4741       |        |        |
|                                  | Simulation | Design | %Error | Simulation | Design | %Error | Simulation | Design | %Error |
| Hydrogen                         | 0.0131     | 0.0131 | 0      | 0.0131     | 0.0131 | 0      | 0.0131     | 0.0131 | 0      |
| Carbon Monoxide                  | 0.0004     | 0.0004 | 0      | 0.0004     | 0.0004 | 0      | 0.0004     | 0.0004 | 0      |
| Carbon Dioxide                   |            |        |        |            |        |        |            |        |        |
| Hydrogen Sulfide                 |            |        |        |            |        |        |            |        |        |
| Methane                          | 0.2316     | 0.2316 | 0      | 0.2316     | 0.2316 | 0      | 0.2316     | 0.2316 | 0      |
| Acetylene                        | 0.0081     | 0.0081 | 0      | 0.0081     | 0.0081 | 0      | 0.0081     | 0.0081 | 0      |
| Ethylene                         | 0.4397     | 0.4397 | 0      | 0.4397     | 0.4397 | 0      | 0.4397     | 0.4397 | 0      |
| Ethane                           | 0.081      | 0.081  | 0      | 0.081      | 0.081  | 0      | 0.081      | 0.081  | 0      |
| Propadiene/Methylacetylene       | 0.0066     | 0.0066 | 0      | 0.0066     | 0.0066 | 0      | 0.0066     | 0.0066 | 0      |
| Propylene                        | 0.1603     | 0.1603 | 0      | 0.1603     | 0.1603 | 0      | 0.1603     | 0.1603 | 0      |
| Propane                          | 0.0048     | 0.0048 | 0      | 0.0048     | 0.0048 | 0      | 0.0048     | 0.0048 | 0      |
| Butadiene/C4 Acetylene           | 0.0177     | 0.0177 | 0      | 0.0177     | 0.0177 | 0      | 0.0177     | 0.0177 | 0      |
| Butylenes                        | 0.0253     | 0.0253 | 0      | 0.0253     | 0.0253 | 0      | 0.0253     | 0.0253 | 0      |
| Butanes                          | 0.008      | 0.008  | 0      | 0.008      | 0.008  | 0      | 0.008      | 0.008  | 0      |
| C5 Hydrocarbons                  | 0.0029     | 0.0029 | 0      | 0.0029     | 0.0029 | 0      | 0.0029     | 0.0029 | 0      |
| C6 Non Aromatics                 | 0.0001     | 0.0001 | 0      | 0.0001     | 0.0001 | 0      | 0.0001     | 0.0001 | 0      |
| C7 Non Aromatics                 |            |        |        |            |        |        |            |        |        |
| C8 Non Aromatics                 |            |        |        |            |        |        |            |        |        |
| Benzene                          | 0.0003     | 0.0003 | 0      | 0.0003     | 0.0003 | 0      | 0.0003     | 0.0003 | 0      |
| Toluene                          |            |        |        |            |        |        |            |        |        |
| Xylene/Ethylbenzene              |            |        |        |            |        |        |            |        |        |
| Styrene                          |            |        |        |            |        |        |            |        |        |
| C9                               |            |        |        |            |        |        |            |        |        |
| 204 288 C (PGO)                  |            |        |        |            |        |        |            |        |        |
| 288 C Plus (PFO)                 |            |        |        |            |        |        |            |        |        |
| Steam/Water                      |            |        |        |            |        |        |            |        |        |
| Nitrogen                         | 0.0001     | 0.0001 | 0      | 0.0001     | 0.0001 | 0      | 0.0001     | 0.0001 | 0      |
| Naptha                           |            |        |        |            |        |        |            |        |        |
| Mass Flow (kg/h)                 | 75849      | 75849  | 0      | 26800      | 26800  | 0      | 26800      | 26800  | 0      |
| Molar Flow (kmole/h)             | 2611.6807  | 2612.7 | 0.04   | 922.7945   | 923.1  | 0.03   | 922.7945   | 923.1  | 0.03   |
| Temperature (°C)                 | -103.7     | -103.7 | 0      | -103.6     | -103.6 | 0      | -77.9      | -77.9  | 0      |
| Pressure (kg/cm <sup>2</sup> _g) | 5.57       | 5.57   | 0      | 5.57       | 5.57   | 0      | 5.61       | 5.61   | 0      |
| Component Properties             | 4706       |        |        | 4178       |        |        | 4106       |        |        |
|                                  | Simulation | Design | %Error | Simulation | Design | %Error | Simulation | Design | %Error |
| Hydrogen                         | 0.1797     | 0.1797 | 0.01   | 0.1797     | 0.1797 | 0.01   | 0.1797     | 0.1797 | 0.01   |
| Carbon Monoxide                  | 0.0011     | 0.0011 | 0.01   | 0.0011     | 0.0011 | 0.01   | 0.0011     | 0.0011 | 0.01   |
| Carbon Dioxide                   |            |        |        |            |        |        |            |        |        |
| Hydrogen Sulfide                 |            |        |        |            |        |        |            |        |        |
| Methane                          | 0.2996     | 0.2996 | 0.01   | 0.2996     | 0.2996 | 0.01   | 0.2996     | 0.2996 | 0.01   |
| Acetylene                        | 0.0058     | 0.0058 | 0.01   | 0.0058     | 0.0058 | 0.01   | 0.0058     | 0.0058 | 0.01   |
| Ethylene                         | 0.3142     | 0.3142 | 0.01   | 0.3142     | 0.3142 | 0.01   | 0.3142     | 0.3142 | 0.01   |
| Ethane                           | 0.0549     | 0.0549 | 0.01   | 0.0549     | 0.0549 | 0.01   | 0.0549     | 0.0549 | 0.01   |
| Propadiene/Methylacetylene       | 0.0042     | 0.0042 | 0      | 0.0042     | 0.0042 | 0      | 0.0042     | 0.0042 | 0.01   |
| Propylene                        | 0.1027     | 0.1027 | 0.01   | 0.1027     | 0.1027 | 0.01   | 0.1027     | 0.1027 | 0.01   |

# Simulation Report – ECC 860 KTA

## Working Stage 6

|                                  |            |        |        |            |        |        |            |        |        |
|----------------------------------|------------|--------|--------|------------|--------|--------|------------|--------|--------|
| Propane                          | 0.0031     | 0.0031 | 0.01   | 0.0031     | 0.0031 | 0      | 0.0031     | 0.0031 | 0.01   |
| Butadiene/C4 Acetylene           | 0.0112     | 0.0112 | 0.01   | 0.0112     | 0.0112 | 0      | 0.0112     | 0.0112 | 0.01   |
| Butylenes                        | 0.016      | 0.016  | 0.01   | 0.016      | 0.016  | 0      | 0.016      | 0.016  | 0.01   |
| Butanes                          | 0.0051     | 0.0051 | 0.01   | 0.0051     | 0.0051 | 0      | 0.0051     | 0.0051 | 0.01   |
| C5 Hydrocarbons                  | 0.0018     | 0.0018 | 0.01   | 0.0018     | 0.0018 | 0      | 0.0018     | 0.0018 | 0      |
| C6 Non Aromatics                 |            |        |        |            |        |        |            |        |        |
| C7 Non Aromatics                 |            |        |        |            |        |        |            |        |        |
| C8 Non Aromatics                 |            |        |        |            |        |        |            |        |        |
| Benzene                          | 0.0002     | 0.0002 | 0.01   | 0.0002     | 0.0002 | 0      | 0.0002     | 0.0002 | 0      |
| Toluene                          |            |        |        |            |        |        |            |        |        |
| Xylene/Ethylbenzene              |            |        |        |            |        |        |            |        |        |
| Styrene                          |            |        |        |            |        |        |            |        |        |
| C9                               |            |        |        |            |        |        |            |        |        |
| 204 288 C (PGO)                  |            |        |        |            |        |        |            |        |        |
| 288 C Plus (PFO)                 |            |        |        |            |        |        |            |        |        |
| Steam/Water                      |            |        |        |            |        |        |            |        |        |
| Nitrogen                         | 0.0003     | 0.0003 | 0      | 0.0003     | 0.0003 | 0      | 0.0003     | 0.0003 | 0      |
| Naptha                           |            |        |        |            |        |        |            |        |        |
| Mass Flow (kg/h)                 | 65371      | 65371  | 0      | 185000     | 185000 | 0      | 185000     | 185000 | 0      |
| Molar Flow (kmole/h)             | 2918.521   | 2918.3 | 0.01   | 8259.4175  | 8258.8 | 0.01   | 8259.418   | 8258.8 | 0.01   |
| Temperature (°C)                 | -30.7      | -30.7  | 0      | -47.1      | -47.1  | 0      | -60.8313   | -59.7  | 1.89   |
| Pressure (kg/cm <sup>2</sup> _g) | 35.28      | 35.28  | 0      | 35.44      | 35.44  | 0      | 35.24      | 35.24  | 0      |
| Component Properties             | 4745       |        |        | 4746       |        |        | 4747       |        |        |
|                                  | Simulation | Design | %Error | Simulation | Design | %Error | Simulation | Design | %Error |
| Hydrogen                         | 0.0131     | 0.0131 | 0      | 0.01       | 0.01   | 0      | 0.02       | 0.02   | 0.01   |
| Carbon Monoxide                  | 0.0004     | 0.0004 | 0      | 0          | 0.00   | 0      | 0          | 0.00   | 0.01   |
| Carbon Dioxide                   |            |        |        |            |        |        |            |        |        |
| Hydrogen Sulfide                 |            |        |        |            |        |        |            |        |        |
| Methane                          | 0.2316     | 0.2316 | 0      | 0.23       | 0.23   | 0      | 0.44       | 0.44   | 0.01   |
| Acetylene                        | 0.0081     | 0.0081 | 0      | 0.01       | 0.01   | 0      | 0.01       | 0.01   | 0.01   |
| Ethylene                         | 0.4397     | 0.4397 | 0      | 0.44       | 0.44   | 0      | 0.45       | 0.45   | 0      |
| Ethane                           | 0.081      | 0.081  | 0      | 0.08       | 0.08   | 0      | 0.06       | 0.06   | 0.06   |
| Propadiene/Methylacetylene       | 0.0066     | 0.0066 | 0      | 0.01       | 0.01   | 0      | 0          | 0.00   | 0.01   |
| Propylene                        | 0.1603     | 0.1603 | 0      | 0.16       | 0.16   | 0      | 0.02       | 0.02   | 0.01   |
| Propane                          | 0.0048     | 0.0048 | 0      | 0          | 0.00   | 0      | 0          | 0.00   | 0.01   |
| Butadiene/C4 Acetylene           | 0.0177     | 0.0177 | 0      | 0.02       | 0.02   | 0      | 0          | 0.00   | 0.01   |
| Butylenes                        | 0.0253     | 0.0253 | 0      | 0.03       | 0.03   | 0      | 0          | 0.00   | 0.01   |
| Butanes                          | 0.008      | 0.008  | 0      | 0.01       | 0.01   | 0      | 0          | 0.00   | 0.01   |
| C5 Hydrocarbons                  | 0.0029     | 0.0029 | 0      | 0          | 0.00   |        |            |        |        |
| C6 Non Aromatics                 | 0.0001     | 0.0001 | 0      | 0          | 0.00   |        |            |        |        |
| C7 Non Aromatics                 |            |        |        |            |        |        |            |        |        |
| C8 Non Aromatics                 |            |        |        |            |        |        |            |        |        |
| Benzene                          | 0.0003     | 0.0003 | 0      | 0          | 0.00   | 0      |            |        |        |
| Toluene                          |            |        |        |            |        |        |            |        |        |
| Xylene/Ethylbenzene              |            |        |        |            |        |        |            |        |        |
| Styrene                          |            |        |        |            |        |        |            |        |        |
| C9                               |            |        |        |            |        |        |            |        |        |
| 204 288 C (PGO)                  |            |        |        |            |        |        |            |        |        |
| 288 C Plus (PFO)                 |            |        |        |            |        |        |            |        |        |
| Steam/Water                      |            |        |        |            |        |        |            |        |        |
| Nitrogen                         | 0.0001     | 0.0001 | 0.0074 | 0.01       | 0.01   | 0      | 0.02       | 0.02   | 0      |
| Naptha                           |            |        |        |            |        |        |            |        |        |
| Mass Flow (kg/h)                 | 102649     | 102649 | 0      | 102649     | 102649 | 0      | 37.8084    | 13341  | 99.72  |
| Molar Flow (kmole/h)             | 3534.4752  | 3535.8 | 0.04   | 3534.4752  | 3535.8 | 0.04   | 587.3767   | 587.4  | 0      |
| Temperature (°C)                 | -77.9      | -77.9  | 0      | -103.6739  | -103.7 | 0.03   | -115.5     | -115.5 | 0      |
| Pressure (kg/cm <sup>2</sup> _g) | 5.61       | 5.61   | 0      | 5.57       | 5.57   | 0      | 5.55       | 5.55   | 0      |

# Simulation Report – ECC 860 KTA

## Working Stage 6

| Component Properties             | 4748       |        |        | 4155       |        |        | 4156       |        |        |
|----------------------------------|------------|--------|--------|------------|--------|--------|------------|--------|--------|
|                                  | Simulation | Design | %Error | Simulation | Design | %Error | Simulation | Design | %Error |
| Hydrogen                         | 0.03       | 0.03   | 0.02   |            |        |        |            |        |        |
| Carbon Monoxide                  | 0          | 0.00   | 0.02   |            |        |        |            |        |        |
| Carbon Dioxide                   |            |        |        |            |        |        |            |        |        |
| Hydrogen Sulfide                 |            |        |        |            |        |        |            |        |        |
| Methane                          | 0.83       | 0.83   | 0.01   | 0.01       | 0.00   | 9344   | 0.01       | 0.00   | 9344   |
| Acetylene                        | 0          | 0.00   | 0.02   | 0.01       | 0.01   | 0.32   | 0.01       | 0.01   | 0.32   |
| Ethylene                         | 0.13       | 0.13   | 0      | 0.6        | 0.61   | 1.52   | 0.6        | 0.61   | 1.52   |
| Ethane                           | 0.01       | 0.01   | 0.02   | 0.1        | 0.10   | 0.16   | 0.1        | 0.10   | 0.16   |
| Propadiene/Methylacetylene       |            |        |        | 0.01       | 0.01   | 1.12   | 0.01       | 0.01   | 1.12   |
| Propylene                        | 0          | 0.00   | 0.02   | 0.2        | 0.20   | 0.02   | 0.2        | 0.20   | 0.02   |
| Propane                          |            |        |        | 0.01       | 0.01   | 0.87   | 0.01       | 0.01   | 0.87   |
| Butadiene/C4 Acetylene           |            |        |        | 0.02       | 0.02   | 0.02   | 0.02       | 0.02   | 0.02   |
| Butylenes                        |            |        |        | 0.03       | 0.03   | 0.27   | 0.03       | 0.03   | 0.27   |
| Butanes                          |            |        |        | 0.01       | 0.01   | 0.71   | 0.01       | 0.01   | 0.71   |
| C5 Hydrocarbons                  |            |        |        | 0          | 0.00   | 0.08   | 0          | 0.00   | 0.08   |
| C6 Non Aromatics                 |            |        |        | 0          | 0.00   | 20.6   | 0          | 0.00   | 20.6   |
| C7 Non Aromatics                 |            |        |        |            |        |        |            |        |        |
| C8 Non Aromatics                 |            |        |        |            |        |        |            |        |        |
| Benzene                          |            |        |        | 0          | 0.00   | 9.55   | 0          | 0.00   | 9.55   |
| Toluene                          |            |        |        |            |        |        | 0          | 0.00   | 0      |
| Xylene/Ethylbenzene              |            |        |        |            |        |        | 0          | 0.00   | 0      |
| Styrene                          |            |        |        |            |        |        | 0          | 0.00   | 0      |
| C9                               |            |        |        |            |        |        | 0          | 0.00   | 0      |
| 204 288 C (PGO)                  |            |        |        |            |        |        | 0          | 0.00   | 0      |
| 288 C Plus (PFO)                 |            |        |        |            |        |        | 0          | 0.00   | 0      |
| Steam/Water                      |            |        |        |            |        |        | 0          | 0.00   | 0      |
| Nitrogen                         | 0.04       | 0.04   | 0      |            |        |        | 0          | 0.00   | 0      |
| Naphtha                          |            |        |        |            |        |        | 0          | 0.00   | 0      |
| Mass Flow (kg/h)                 | 18486      | 18486  | 0      | 193150.861 | 193816 | 0.34   | 193150.9   | 193816 | 0.34   |
| Molar Flow (kmole/h)             | 1070.3447  | 1070.3 | 0      | 5861.8004  | 5864.1 | 0.04   | 5861.8     | 5864.1 | 0.04   |
| Temperature (°C)                 | -138.3     | -138.3 | 0      | -55.6703   | -52.8  | 5.44   | -50.9      | -50.9  | 0      |
| Pressure (kg/cm <sup>2</sup> _g) | 5.53       | 5.53   | 0      | 5.73       | 5.73   | 0      | 27.9       | 27.9   | 0      |
| Component Properties             | 4195       |        |        | 4196       |        |        | 4197       |        |        |
|                                  | Simulation | Design | %Error | Simulation | Design | %Error | Simulation | Design | %Error |
| Hydrogen                         | 0          | 0.01   | 99.37  | 0          | 0.01   | 99.37  | 0          | 0.01   | 99.37  |
| Carbon Monoxide                  |            |        |        |            |        |        |            |        |        |
| Carbon Dioxide                   |            |        |        |            |        |        |            |        |        |
| Hydrogen Sulfide                 |            |        |        |            |        |        |            |        |        |
| Methane                          | 0.11       | 0.11   | 0.45   | 0.11       | 0.11   | 0.45   | 0.11       | 0.11   | 0.45   |
| Acetylene                        | 0.01       | 0.01   | 6.15   | 0.01       | 0.01   | 6.15   | 0.01       | 0.01   | 6.15   |
| Ethylene                         | 0.55       | 0.59   | 6.95   | 0.55       | 0.59   | 6.95   | 0.55       | 0.59   | 6.95   |
| Ethane                           | 0.09       | 0.09   | 2.59   | 0.09       | 0.09   | 2.59   | 0.09       | 0.09   | 2.59   |
| Propadiene/Methylacetylene       | 0.01       | 0.01   | 22.47  | 0.01       | 0.01   | 22.47  | 0.01       | 0.01   | 22.47  |
| Propylene                        | 0.17       | 0.14   | 19.98  | 0.17       | 0.14   | 19.98  | 0.17       | 0.14   | 19.98  |
| Propane                          | 0          | 0.00   | 20.17  | 0          | 0.00   | 20.17  | 0          | 0.00   | 20.17  |
| Butadiene/C4 Acetylene           | 0.02       | 0.01   | 23.76  | 0.02       | 0.01   | 23.76  | 0.02       | 0.01   | 23.76  |
| Butylenes                        | 0.03       | 0.02   | 23.92  | 0.03       | 0.02   | 23.92  | 0.03       | 0.02   | 23.92  |
| Butanes                          | 0.01       | 0.01   | 24.83  | 0.01       | 0.01   | 24.83  | 0.01       | 0.01   | 24.83  |
| C5 Hydrocarbons                  | 0          | 0.00   | 27.46  | 0          | 0.00   | 27.46  | 0          | 0.00   | 27.46  |
| C6 Non Aromatics                 | 0          | 0.00   | 1.08   | 0          | 0.00   | 1.08   | 0          | 0.00   | 1.08   |
| C7 Non Aromatics                 |            |        |        |            |        |        |            |        |        |
| C8 Non Aromatics                 |            |        |        |            |        |        |            |        |        |
| Benzene                          | 0          | 0.00   | 51.62  | 0          | 0.00   | 51.62  | 0          | 0.00   | 51.62  |
| Toluene                          |            |        |        |            |        |        |            |        |        |

# Simulation Report – ECC 860 KTA

## Working Stage 6

|                            |            |        |        |            |        |        |            |        |        |
|----------------------------|------------|--------|--------|------------|--------|--------|------------|--------|--------|
| Xylene/Ethylbenzene        |            |        |        |            |        |        |            |        |        |
| Styrene                    |            |        |        |            |        |        |            |        |        |
| C9                         |            |        |        |            |        |        |            |        |        |
| 204 288 C (PGO)            |            |        |        |            |        |        |            |        |        |
| 288 C Plus (PFO)           |            |        |        |            |        |        |            |        |        |
| Steam/Water                |            |        |        |            |        |        |            |        |        |
| Nitrogen                   |            |        |        |            |        |        |            |        |        |
| Naphtha                    |            |        |        |            |        |        |            |        |        |
| Mass Flow (kg/h)           | 51817.3475 | 51768  | 0.1    | 51817.3475 | 51768  | 0.1    | 20939      | 20939  | 0      |
| Molar Flow (kmole/h)       | 1675.653   | 1715   | 2.29   | 1675.653   | 1715   | 2.29   | 677.1188   | 693.7  | 2.39   |
| Temperature (°C)           | -84.5928   | -87.9  | 3.76   | -70.4      | -70.4  | 0      | -84.5928   | -87.9  | 3.76   |
| Pressure (kg/cm²_g)        | 5.62       | 5.59   | 0.54   | 5.66       | 5.66   | 0      | 5.62       | 5.59   | 0.54   |
| Component Properties       | 4180       |        |        | 4181       |        |        | 4182       |        |        |
|                            | Simulation | Design | %Error | Simulation | Design | %Error | Simulation | Design | %Error |
| Hydrogen                   | 0.06       | 0.06   | 0.15   | 0.06       | 0.06   | 0.15   | 0.06       | 0.06   | 0.15   |
| Carbon Monoxide            | 0          | 0.00   | 3.14   | 0          | 0.00   | 3.14   | 0          | 0.00   | 3.14   |
| Carbon Dioxide             |            |        |        |            |        |        |            |        |        |
| Hydrogen Sulfide           |            |        |        |            |        |        |            |        |        |
| Methane                    | 0.93       | 0.94   | 1.29   | 0.93       | 0.94   | 1.29   | 0.93       | 0.94   | 1.29   |
| Acetylene                  | 0          | 0.00   | 10.44  | 0          | 0.00   | 10.44  | 0          | 0.00   | 10.44  |
| Ethylene                   | 0.02       | 0.00   | 305.91 | 0.02       | 0.00   | 305.91 | 0.02       | 0.00   | 305.91 |
| Ethane                     |            |        |        |            |        |        |            |        |        |
| Propadiene/Methylacetylene |            |        |        |            |        |        |            |        |        |
| Propylene                  |            |        |        |            |        |        |            |        |        |
| Propane                    |            |        |        |            |        |        |            |        |        |
| Butadiene/C4 Acetylene     |            |        |        |            |        |        |            |        |        |
| Butylenes                  |            |        |        |            |        |        |            |        |        |
| Butanes                    |            |        |        |            |        |        |            |        |        |
| C5 Hydrocarbons            |            |        |        |            |        |        |            |        |        |
| C6 Non Aromatics           |            |        |        |            |        |        |            |        |        |
| C7 Non Aromatics           |            |        |        |            |        |        |            |        |        |
| C8 Non Aromatics           |            |        |        |            |        |        |            |        |        |
| Benzene                    |            |        |        |            |        |        |            |        |        |
| Toluene                    |            |        |        |            |        |        |            |        |        |
| Xylene/Ethylbenzene        |            |        |        |            |        |        |            |        |        |
| Styrene                    |            |        |        |            |        |        |            |        |        |
| C9                         |            |        |        |            |        |        |            |        |        |
| 204 288 C (PGO)            |            |        |        |            |        |        |            |        |        |
| 288 C Plus (PFO)           |            |        |        |            |        |        |            |        |        |
| Steam/Water                |            |        |        |            |        |        |            |        |        |
| Nitrogen                   | 0.04       | 0.04   | 0      | 0.04       | 0.04   | 0      | 0.04       | 0.04   | 0      |
| Naphtha                    |            |        |        |            |        |        |            |        |        |
| Mass Flow (kg/h)           | 15735      | 15735  | 0      | 15735      | 15735  | 0      | 15735      | 15735  | 0      |
| Molar Flow (kmole/h)       | 1016.17    | 1025.9 | 0.95   | 1016.17    | 1025.9 | 0.95   | 1016.17    | 1025.9 | 0.95   |
| Temperature (°C)           | -70        | -60    | 16.67  | -84        | -84    | 0      | -100.957   | -98    | 3.02   |
| Pressure (kg/cm²_g)        | 38.18      | 38.18  | 0      | 38.03      | 38.03  | 0      | 37.85      | 37.85  | 0      |
| Component Properties       | 4184       |        |        | 4185       |        |        | 4186       |        |        |
|                            | Simulation | Design | %Error | Simulation | Design | %Error | Simulation | Design | %Error |
| Hydrogen                   | 0.33       | 0.31   | 8.53   | 0.03       | 0.03   | 13.24  | 0.03       | 0.03   | 13.24  |
| Carbon Monoxide            | 0          | 0.00   | 9.14   | 0          | 0.00   | 3.78   | 0          | 0.00   | 3.78   |
| Carbon Dioxide             |            |        |        |            |        |        |            |        |        |
| Hydrogen Sulfide           |            |        |        |            |        |        |            |        |        |
| Methane                    | 0.66       | 0.69   | 4.05   | 0.96       | 0.96   | 0.98   | 0.96       | 0.96   | 0.98   |
| Acetylene                  | 0          | 0.00   | 0      | 0          | 0.00   | 21.74  | 0          | 0.00   | 21.74  |
| Ethylene                   | 0          | 0.00   | 183.95 | 0.02       | 0.00   | 304.07 | 0.02       | 0.00   | 304.07 |



# Simulation Report – ECC 860 KTA

## Working Stage 6

| Ethane                           |            |        |        |            |        |        |            |        |        |
|----------------------------------|------------|--------|--------|------------|--------|--------|------------|--------|--------|
| Propadiene/Methylacetylene       |            |        |        |            |        |        |            |        |        |
| Propylene                        |            |        |        |            |        |        |            |        |        |
| Propane                          |            |        |        |            |        |        |            |        |        |
| Butadiene/C4 Acetylene           |            |        |        |            |        |        |            |        |        |
| Butylenes                        |            |        |        |            |        |        |            |        |        |
| Butanes                          |            |        |        |            |        |        |            |        |        |
| C5 Hydrocarbons                  |            |        |        |            |        |        |            |        |        |
| C6 Non Aromatics                 |            |        |        |            |        |        |            |        |        |
| C7 Non Aromatics                 |            |        |        |            |        |        |            |        |        |
| C8 Non Aromatics                 |            |        |        |            |        |        |            |        |        |
| Benzene                          |            |        |        |            |        |        |            |        |        |
| Toluene                          |            |        |        |            |        |        |            |        |        |
| Xylene/Ethylbenzene              |            |        |        |            |        |        |            |        |        |
| Styrene                          |            |        |        |            |        |        |            |        |        |
| C9                               |            |        |        |            |        |        |            |        |        |
| 204 288 C (PGO)                  |            |        |        |            |        |        |            |        |        |
| 288 C Plus (PFO)                 |            |        |        |            |        |        |            |        |        |
| Steam/Water                      |            |        |        |            |        |        |            |        |        |
| Nitrogen                         | 0.15       | 0.08   | 87.5   | 0.03       | 0.03   | 0      | 0.03       | 0.03   | 0      |
| Naphtha                          |            |        |        |            |        |        |            |        |        |
| Mass Flow (kg/h)                 | 1143.7217  | 1158   | 1.23   | 14591.3951 | 14577  | 0.1    | 2150       | 2150   | 0      |
| Molar Flow (kmole/h)             | 100.1383   | 98.4   | 1.77   | 916.0317   | 927.6  | 1.25   | 134.9746   | 136.8  | 1.33   |
| Temperature (°C)                 | -106.6783  | -105.8 | 0.83   | -106.6783  | -105.8 | 0.83   | -134.818   | -135.5 | 0.5    |
| Pressure (kg/cm <sup>2</sup> _g) | 37.58      | 37.51  | 0.19   | 37.58      | 37.51  | 0.19   | 5.51       | 5.51   | 0      |
| Component Properties             | 4176       |        |        | 4172       |        |        | 4173       |        |        |
|                                  | Simulation | Design | %Error | Simulation | Design | %Error | Simulation | Design | %Error |
| Hydrogen                         | 0.06       | 0.06   | 0.15   | 0.06       | 0.06   | 0.15   | 0.06       | 0.06   | 0.15   |
| Carbon Monoxide                  | 0          | 0.00   | 3.14   | 0          | 0.00   | 3.14   | 0          | 0.00   | 3.14   |
| Carbon Dioxide                   |            |        |        |            |        |        |            |        |        |
| Hydrogen Sulfide                 |            |        |        |            |        |        |            |        |        |
| Methane                          | 0.93       | 0.94   | 1.29   | 0.93       | 0.94   | 1.29   | 0.93       | 0.94   | 1.29   |
| Acetylene                        | 0          | 0.00   | 10.44  | 0          | 0.00   | 10.44  | 0          | 0.00   | 10.44  |
| Ethylene                         | 0.02       | 0.00   | 305.91 | 0.02       | 0.00   | 305.91 | 0.02       | 0.00   | 305.91 |
| Ethane                           |            |        |        |            |        |        |            |        |        |
| Propadiene/Methylacetylene       |            |        |        |            |        |        |            |        |        |
| Propylene                        |            |        |        |            |        |        |            |        |        |
| Propane                          |            |        |        |            |        |        |            |        |        |
| Butadiene/C4 Acetylene           |            |        |        |            |        |        |            |        |        |
| Butylenes                        |            |        |        |            |        |        |            |        |        |
| Butanes                          |            |        |        |            |        |        |            |        |        |
| C5 Hydrocarbons                  |            |        |        |            |        |        |            |        |        |
| C6 Non Aromatics                 |            |        |        |            |        |        |            |        |        |
| C7 Non Aromatics                 |            |        |        |            |        |        |            |        |        |
| C8 Non Aromatics                 |            |        |        |            |        |        |            |        |        |
| Benzene                          |            |        |        |            |        |        |            |        |        |
| Toluene                          |            |        |        |            |        |        |            |        |        |
| Xylene/Ethylbenzene              |            |        |        |            |        |        |            |        |        |
| Styrene                          |            |        |        |            |        |        |            |        |        |
| C9                               |            |        |        |            |        |        |            |        |        |
| 204 288 C (PGO)                  |            |        |        |            |        |        |            |        |        |
| 288 C Plus (PFO)                 |            |        |        |            |        |        |            |        |        |
| Steam/Water                      |            |        |        |            |        |        |            |        |        |
| Nitrogen                         | 0.04       | 0.04   | 0      | 0.04       | 0.04   | 0      | 0.04       | 0.04   | 0      |
| Naptha                           |            |        |        |            |        |        |            |        |        |
| Mass Flow (kg/h)                 | 15735      | 15735  | 0      | 23648      | 23648  | 0      | 7913       | 7913   | 0      |
| Molar Flow (kmole/h)             | 1016.17    | 1025.9 | 0.95   | 1527.1935  | 1541.9 | 0.95   | 511.0234   | 515.9  | 0.95   |

# Simulation Report – ECC 860 KTA

## Working Stage 6

|                                  |            |        |        |            |        |        |            |        |        |
|----------------------------------|------------|--------|--------|------------|--------|--------|------------|--------|--------|
| Temperature (°C)                 | 153.5      | 153.5  | 0      | 41         | 41     | 0      | 85.9       | 85.9   | 0      |
| Pressure (kg/cm <sup>2</sup> _g) | 38.53      | 38.53  | 0      | 14.33      | 14.33  | 0      | 22.1       | 22.1   | 0      |
| Component Properties             | 4198       |        |        | 4183       |        |        | 4187       |        |        |
|                                  | Simulation | Design | %Error | Simulation | Design | %Error | Simulation | Design | %Error |
| Hydrogen                         | 0          | 0.01   | 99.37  | 0.06       | 0.06   | 0.15   | 0.03       | 0.03   | 13.24  |
| Carbon Monoxide                  |            |        |        | 0          | 0.00   | 3.14   | 0          | 0.00   | 3.78   |
| Carbon Dioxide                   |            |        |        |            |        |        |            |        |        |
| Hydrogen Sulfide                 |            |        |        |            |        |        |            |        |        |
| Methane                          | 0.11       | 0.11   | 0.45   | 0.93       | 0.94   | 1.29   | 0.96       | 0.96   | 0.98   |
| Acetylene                        | 0.01       | 0.01   | 6.15   | 0          | 0.00   | 10.44  | 0          | 0.00   | 21.74  |
| Ethylene                         | 0.55       | 0.59   | 6.95   | 0.02       | 0.00   | 305.91 | 0.02       | 0.00   | 304.07 |
| Ethane                           | 0.09       | 0.09   | 2.59   |            |        |        |            |        |        |
| Propadiene/Methylacetylene       | 0.01       | 0.01   | 22.47  |            |        |        |            |        |        |
| Propylene                        | 0.17       | 0.14   | 19.98  |            |        |        |            |        |        |
| Propane                          | 0          | 0.00   | 20.17  |            |        |        |            |        |        |
| Butadiene/C4 Acetylene           | 0.02       | 0.01   | 23.76  |            |        |        |            |        |        |
| Butylenes                        | 0.03       | 0.02   | 23.92  |            |        |        |            |        |        |
| Butanes                          | 0.01       | 0.01   | 24.83  |            |        |        |            |        |        |
| C5 Hydrocarbons                  | 0          | 0.00   | 27.46  |            |        |        |            |        |        |
| C6 Non Aromatics                 | 0          | 0.00   | 1.08   |            |        |        |            |        |        |
| C7 Non Aromatics                 |            |        |        |            |        |        |            |        |        |
| C8 Non Aromatics                 |            |        |        |            |        |        |            |        |        |
| Benzene                          | 0          | 0.00   | 51.62  |            |        |        |            |        |        |
| Toluene                          |            |        |        |            |        |        |            |        |        |
| Xylene/Ethylbenzene              |            |        |        |            |        |        |            |        |        |
| Styrene                          |            |        |        |            |        |        |            |        |        |
| C9                               |            |        |        |            |        |        |            |        |        |
| 204 288 C (PGO)                  |            |        |        |            |        |        |            |        |        |
| 288 C Plus (PFO)                 |            |        |        |            |        |        |            |        |        |
| Steam/Water                      |            |        |        |            |        |        |            |        |        |
| Nitrogen                         |            |        |        | 0.04       | 0.04   | 0      | 0.03       | 0.03   | 0      |
| Naphtha                          |            |        |        |            |        |        |            |        |        |
| Mass Flow (kg/h)                 | 20939      | 20939  | 0      | 15735      | 15735  | 0      | 12441.4    | 12427  | 0.12   |
| Molar Flow (kmole/h)             | 677.1188   | 693.7  | 2.39   | 1016.17    | 1025.9 | 0.95   | 781.0571   | 790.7  | 1.22   |
| Temperature (°C)                 | -70.4      | -70.4  | 0      | -106.6783  | -105.8 | 0.83   | -134.955   | -135.5 | 0.4    |
| Pressure (kg/cm <sup>2</sup> _g) | 5.66       | 5.66   | 0      | 37.58      | 37.58  | 0      | 5.46       | 5.51   | 0.91   |
| Component Properties             | 4107       |        |        | 4743       |        |        | 4177       |        |        |
|                                  | Simulation | Design | %Error | Simulation | Design | %Error | Simulation | Design | %Error |
| Hydrogen                         | 0.1797     | 0.1797 | 0.01   | 0.02       | 0.02   | 0      | 0.06       | 0.06   | 0.15   |
| Carbon Monoxide                  | 0.0011     | 0.0011 | 0.01   | 0.0007     | 0.0007 | 0      | 0          | 0.00   | 3.14   |
| Carbon Dioxide                   |            |        |        |            |        |        |            |        |        |
| Hydrogen Sulfide                 |            |        |        |            |        |        |            |        |        |
| Methane                          | 0.2996     | 0.2996 | 0.01   | 0.4424     | 0.4424 | 0      | 0.93       | 0.94   | 1.29   |
| Acetylene                        | 0.0058     | 0.0058 | 0.01   | 0.0077     | 0.0077 | 0      | 0          | 0.00   | 10.44  |
| Ethylene                         | 0.3142     | 0.3142 | 0.01   | 0.4469     | 0.4469 | 0      | 0.02       | 0.00   | 305.91 |
| Ethane                           | 0.0549     | 0.0549 | 0.01   | 0.0555     | 0.0555 | 0      |            |        |        |
| Propadiene/Methylacetylene       | 0.0042     | 0.0042 | 0.01   | 0.0005     | 0.0005 | 0      |            |        |        |
| Propylene                        | 0.1027     | 0.1027 | 0.01   | 0.0242     | 0.0242 | 0      |            |        |        |
| Propane                          | 0.0031     | 0.0031 | 0.01   | 0.0006     | 0.0006 | 0      |            |        |        |
| Butadiene/C4 Acetylene           | 0.0112     | 0.0112 | 0.01   | 0.0005     | 0.0005 | 0      |            |        |        |
| Butylenes                        | 0.016      | 0.016  | 0.01   | 0.0007     | 0.0007 | 0      |            |        |        |
| Butanes                          | 0.0051     | 0.0051 | 0.01   | 0.0002     | 0.0002 | 0      |            |        |        |
| C5 Hydrocarbons                  | 0.0018     | 0.0018 | 0      |            |        |        |            |        |        |
| C6 Non Aromatics                 |            |        |        |            |        |        |            |        |        |
| C7 Non Aromatics                 |            |        |        |            |        |        |            |        |        |
| C8 Non Aromatics                 |            |        |        |            |        |        |            |        |        |

# Simulation Report – ECC 860 KTA

## Working Stage 6

|                                  |            |        |         |            |        |        |            |        |        |
|----------------------------------|------------|--------|---------|------------|--------|--------|------------|--------|--------|
| Benzene                          | 0.0002     | 0.0002 | 0       |            |        |        |            |        |        |
| Toluene                          |            |        |         |            |        |        |            |        |        |
| Xylene/Ethylbenzene              |            |        |         |            |        |        |            |        |        |
| Styrene                          |            |        |         |            |        |        |            |        |        |
| C9                               |            |        |         |            |        |        |            |        |        |
| 204 288 C (PGO)                  |            |        |         |            |        |        |            |        |        |
| 288 C Plus (PFO)                 |            |        |         |            |        |        |            |        |        |
| Steam/Water                      |            |        |         |            |        |        |            |        |        |
| Nitrogen                         | 0.0003     | 0.0003 | 0       | 0.0002     | 0.0002 | 0      | 0.04       | 0.04   | 0      |
| Naphtha                          |            |        |         |            |        |        |            |        |        |
| Mass Flow (kg/h)                 | 185000     | 185000 | 0       | 3489       | 3489   | 0      | 15735      | 15735  | 0      |
| Molar Flow (kmole/h)             | 8259.4175  | 8258.8 | 0.01    | 153.6325   | 153.6  | 0.0212 | 1016.17    | 1025.9 | 0.95   |
| Temperature (°C)                 | -65.3      | -65.3  | 0       | -115.5     | -115.5 | 0      | 41         | 41     | 0      |
| Pressure (kg/cm <sup>2</sup> _g) | 34.96      | 34.96  | 0       | 5.55       | 5.55   | 0      | 38.39      | 38.39  | 0      |
| Component Properties             | 4201       |        |         | 4190       |        |        | 4171       |        |        |
|                                  | Simulation | Design | %Error  | Simulation | Design | %Error | Simulation | Design | %Error |
| Hydrogen                         |            |        |         | 0.0721     | 0.0721 | 0      | 0.06       | 0.06   | 0.15   |
| Carbon Monoxide                  |            |        |         | 0.002      | 0.002  | 0      | 0          | 0.00   | 3.14   |
| Carbon Dioxide                   |            |        |         |            |        |        |            |        |        |
| Hydrogen Sulfide                 |            |        |         |            |        |        |            |        |        |
| Methane                          | 0.0001     | 0.0001 | 8.5241  | 0.9208     | 0.9208 | 0      | 0.93       | 0.94   | 1.29   |
| Acetylene                        | 0.0109     | 0.0109 | 0.165   | 0.0001     | 0.0001 | 0.01   | 0          | 0.00   | 10.44  |
| Ethylene                         | 0.609      | 0.6091 | 0.0089  | 0.0046     | 0.0046 | 0      | 0.02       | 0.00   | 305.91 |
| Ethane                           | 0.1047     | 0.1047 | 0.005   |            |        |        |            |        |        |
| Propadiene/Methylacetylene       | 0.008      | 0.0081 | 1.1407  |            |        |        |            |        |        |
| Propylene                        | 0.1958     | 0.1958 | 0.0072  |            |        |        |            |        |        |
| Propane                          | 0.0058     | 0.0059 | 0.8919  |            |        |        |            |        |        |
| Butadiene/C4 Acetylene           | 0.0214     | 0.0214 | 0.043   |            |        |        |            |        |        |
| Butylenes                        | 0.0306     | 0.0305 | 0.2429  |            |        |        |            |        |        |
| Butanes                          | 0.0097     | 0.0096 | 0.6827  |            |        |        |            |        |        |
| C5 Hydrocarbons                  | 0.0035     | 0.0035 | 0.0999  |            |        |        |            |        |        |
| C6 Non Aromatics                 | 0.0001     | 0.0001 | 20.5691 |            |        |        |            |        |        |
| C7 Non Aromatics                 |            |        |         |            |        |        |            |        |        |
| C8 Non Aromatics                 |            |        |         |            |        |        |            |        |        |
| Benzene                          | 0.0004     | 0.0004 | 9.5732  |            |        |        |            |        |        |
| Toluene                          |            |        |         |            |        |        |            |        |        |
| Xylene/Ethylbenzene              |            |        |         |            |        |        |            |        |        |
| Styrene                          |            |        |         |            |        |        |            |        |        |
| C9                               |            |        |         |            |        |        |            |        |        |
| 204 288 C (PGO)                  |            |        |         |            |        |        |            |        |        |
| 288 C Plus (PFO)                 |            |        |         |            |        |        |            |        |        |
| Steam/Water                      |            |        |         |            |        |        |            |        |        |
| Nitrogen                         |            |        |         | 0.0004     | 0.0004 | 0      | 0.04       | 0.04   | 0      |
| Naphtha                          |            |        |         |            |        |        |            |        |        |
| Mass Flow (kg/h)                 | 58145      | 58145  | 0       | 7913       | 7913   | 0      | 23648      | 23648  | 0      |
| Molar Flow (kmole/h)             | 1758.6569  | 1759.2 | 0.03    | 523.4665   | 523.4  | 0.01   | 1527.194   | 1541.9 | 0.95   |
| Temperature (°C)                 | -14        | -14    | 0       | 35         | 35     | 0      | 133.1      | 133.1  | 0      |
| Pressure (kg/cm <sup>2</sup> _g) | 21.68      | 21.68  | 0       | 5.23       | 5.23   | 0      | 14.5       | 14.5   | 0      |
| Component Properties             | 4170       |        |         | 4179       |        |        | 4164       |        |        |
|                                  | Simulation | Design | %Error  | Simulation | Design | %Error | Simulation | Design | %Error |
| Hydrogen                         | 0.06       | 0.06   | 0.15    | 0.06       | 0.06   | 0.15   | 0          | 0.01   | 99.37  |
| Carbon Monoxide                  | 0          | 0.00   | 3.14    | 0          | 0.00   | 3.14   |            |        |        |
| Carbon Dioxide                   |            |        |         |            |        |        |            |        |        |
| Hydrogen Sulfide                 |            |        |         |            |        |        |            |        |        |

# Simulation Report – ECC 860 KTA

## Working Stage 6

|                                  |           |        |        |         |        |        |          |        |       |
|----------------------------------|-----------|--------|--------|---------|--------|--------|----------|--------|-------|
| Methane                          | 0.93      | 0.94   | 1.29   | 0.93    | 0.94   | 1.29   | 0.11     | 0.11   | 0.45  |
| Acetylene                        | 0         | 0.00   | 10.44  | 0       | 0.00   | 10.44  | 0.01     | 0.01   | 6.15  |
| Ethylene                         | 0.02      | 0.00   | 305.91 | 0.02    | 0.00   | 305.91 | 0.55     | 0.59   | 6.95  |
| Ethane                           |           |        |        |         |        |        | 0.09     | 0.09   | 2.59  |
| Propadiene/Methylacetylene       |           |        |        |         |        |        | 0.01     | 0.01   | 22.47 |
| Propylene                        |           |        |        |         |        |        | 0.17     | 0.14   | 19.98 |
| Propane                          |           |        |        |         |        |        | 0        | 0.00   | 20.17 |
| Butadiene/C4 Acetylene           |           |        |        |         |        |        | 0.02     | 0.01   | 23.76 |
| Butylenes                        |           |        |        |         |        |        | 0.03     | 0.02   | 23.92 |
| Butanes                          |           |        |        |         |        |        | 0.01     | 0.01   | 24.83 |
| C5 Hydrocarbons                  |           |        |        |         |        |        | 0        | 0.00   | 27.46 |
| C6 Non Aromatics                 |           |        |        |         |        |        | 0        | 0.00   | 1.08  |
| C7 Non Aromatics                 |           |        |        |         |        |        |          |        |       |
| C8 Non Aromatics                 |           |        |        |         |        |        |          |        |       |
| Benzene                          |           |        |        |         |        |        | 0        | 0.00   | 51.62 |
| Toluene                          |           |        |        |         |        |        |          |        |       |
| Xylene/Ethylbenzene              |           |        |        |         |        |        |          |        |       |
| Styrene                          |           |        |        |         |        |        |          |        |       |
| C9                               |           |        |        |         |        |        |          |        |       |
| 204 288 C (PGO)                  |           |        |        |         |        |        |          |        |       |
| 288 C Plus (PFO)                 |           |        |        |         |        |        |          |        |       |
| Steam/Water                      |           |        |        |         |        |        |          |        |       |
| Nitrogen                         | 0.04      | 0.04   | 0      | 0.04    | 0.04   | 0      |          |        |       |
| Naptha                           |           |        |        |         |        |        |          |        |       |
| Mass Flow (kg/h)                 | 23648     | 23648  | 0      | 15735   | 15735  | 0      | 72756.35 | 72707  | 0.07  |
| Molar Flow (kmole/h)             | 1527.1935 | 1541.9 | 0.95   | 1016.17 | 1025.9 | 0.95   | 2352.772 | 2408.7 | 2.32  |
| Temperature (°C)                 | 36.9513   | 36.9   | 0.14   | -60     | -46.1  | 30.15  | -84.5928 | -87.9  | 3.76  |
| Pressure (kg/cm <sup>2</sup> _g) | 5.23      | 4.95   | 5.66   | 38.32   | 38.32  | 0      | 5.62     | 5.59   | 0.54  |

**Table A.3.2. Methanation Stream Properties**

| Component Properties       | 4139       |        |        | 4729       |        |        | 4001       |        |        |
|----------------------------|------------|--------|--------|------------|--------|--------|------------|--------|--------|
|                            | Simulation | Design | %Error | Simulation | Design | %Error | Simulation | Design | %Error |
| Hydrogen                   | 0.9652     | 0.9652 | 0.0    | 0.9658     | 0.9658 | 0.0    | 0.9653     | 0.9653 | 0.0    |
| Carbon Monoxide            | 0.0026     | 0.0026 | 0.0    | 0.0024     | 0.0024 | 0.0    | 0.0026     | 0.0026 | 0.0    |
| Carbon Dioxide             |            |        |        |            |        |        |            |        |        |
| Hydrogen Sulfide           |            |        |        |            |        |        |            |        |        |
| Methane                    | 0.0313     | 0.0313 | 0.0    | 0.031      | 0.031  | 0.0    | 0.0312     | 0.0312 | 0.0    |
| Acetylene                  |            |        |        |            |        |        |            |        |        |
| Ethylene                   |            |        |        |            |        |        |            |        |        |
| Ethane                     |            |        |        |            |        |        |            |        |        |
| Propadiene/Methylacetylene |            |        |        |            |        |        |            |        |        |
| Propylene                  |            |        |        |            |        |        |            |        |        |
| Propane                    |            |        |        |            |        |        |            |        |        |
| Butadiene/C4 Acetylene     |            |        |        |            |        |        |            |        |        |
| Butylenes                  |            |        |        |            |        |        |            |        |        |
| Butanes                    |            |        |        |            |        |        |            |        |        |
| C5 Hydrocarbons            |            |        |        |            |        |        |            |        |        |
| C6 Non Aromatics           |            |        |        |            |        |        |            |        |        |
| C7 Non Aromatics           |            |        |        |            |        |        |            |        |        |
| C8 Non Aromatics           |            |        |        |            |        |        |            |        |        |
| Benzene                    |            |        |        |            |        |        |            |        |        |
| Toluene                    |            |        |        |            |        |        |            |        |        |
| Xylene/Ethylbenzene        |            |        |        |            |        |        |            |        |        |
| Styrene                    |            |        |        |            |        |        |            |        |        |
| C9                         |            |        |        |            |        |        |            |        |        |

# Simulation Report – ECC 860 KTA

## Working Stage 6

| 204 288 C (PGO)                  |            |        |        |            |        |        |            |        |        |
|----------------------------------|------------|--------|--------|------------|--------|--------|------------|--------|--------|
| 288 C Plus (PFO)                 |            |        |        |            |        |        |            |        |        |
| Steam/Water                      |            |        |        |            |        |        |            |        |        |
| Nitrogen                         | 0.0009     | 0.0009 | 0.0    | 0.0008     | 0.0008 | 0.0    | 0.0009     | 0.0009 | 0.0    |
| Naphtha                          |            |        |        |            |        |        |            |        |        |
| Mass Flow (kg/h)                 | 3313       | 3313   | 0      | 969        | 969    | 0      | 1111       | 1111   | 0      |
| Molar Flow (kmole/h)             | 1301.2436  | 1300.8 | 0.03   | 382.3965   | 382.5  | 0.03   | 436.8342   | 436.8  | 0.01   |
| Temperature (°C)                 | 35         | 35     | 0      | 35         | 35     | 0      | 36.1217    | 35.7   | 1.18   |
| Pressure (kg/cm <sup>2</sup> _g) | 32.22      | 32.22  | 0      | 32.22      | 32.22  | 0      | 3.5        | 3.5    | 0      |
| Component Properties             | 4012       |        |        | 4016       |        |        | 4014       |        |        |
|                                  | Simulation | Design | %Error | Simulation | Design | %Error | Simulation | Design | %Error |
| Hydrogen                         | 0.965      | 0.965  | 0.0    |            |        |        | 0.9972     | 0.997  | 0.0    |
| Carbon Monoxide                  |            |        |        |            |        |        |            |        |        |
| Carbon Dioxide                   |            |        |        |            |        |        |            |        |        |
| Hydrogen Sulfide                 |            |        |        |            |        |        |            |        |        |
| Methane                          | 0.0341     | 0.0341 | 0.0    |            |        |        |            |        |        |
| Acetylene                        |            |        |        |            |        |        |            |        |        |
| Ethylene                         |            |        |        | 0.0051     | 0.005  | 2.0    |            |        |        |
| Ethane                           |            |        |        | 0.9898     | 0.9898 | 0.0    | 0.0019     | 0.002  | 5.0    |
| Propadiene/Methylacetylene       |            |        |        |            |        |        |            |        |        |
| Propylene                        |            |        |        | 0.005      | 0.005  | 0.0    |            |        |        |
| Propane                          |            |        |        |            |        |        |            |        |        |
| Butadiene/C4 Acetylene           |            |        |        |            |        |        |            |        |        |
| Butylenes                        |            |        |        |            |        |        |            |        |        |
| Butanes                          |            |        |        |            |        |        |            |        |        |
| C5 Hydrocarbons                  |            |        |        |            |        |        |            |        |        |
| C6 Non Aromatics                 |            |        |        |            |        |        |            |        |        |
| C7 Non Aromatics                 |            |        |        |            |        |        |            |        |        |
| C8 Non Aromatics                 |            |        |        |            |        |        |            |        |        |
| Benzene                          |            |        |        |            |        |        |            |        |        |
| Toluene                          |            |        |        |            |        |        |            |        |        |
| Xylene/Ethylbenzene              |            |        |        |            |        |        |            |        |        |
| Styrene                          |            |        |        |            |        |        |            |        |        |
| C9                               |            |        |        |            |        |        |            |        |        |
| 204 288 C (PGO)                  |            |        |        |            |        |        |            |        |        |
| 288 C Plus (PFO)                 |            |        |        |            |        |        |            |        |        |
| Steam/Water                      |            |        |        |            |        |        |            |        |        |
| Nitrogen                         | 0.0009     | 0.0009 | 0.0    | 0.0001     | 0.0001 | 0.0    | 0.0009     | 0.0009 | 0.0    |
| Naphtha                          |            |        |        |            |        |        |            |        |        |
| Mass Flow (kg/h)                 | 363.8098   | 364    | 0.05   | 3725       | 3725   | 0      | 290.7106   | 290    | 0.25   |
| Molar Flow (kmole/h)             | 144.5      | 144.5  | 0      | 123.6741   | 123.7  | 0.02   | 138.9566   | 138.3  | 0.47   |
| Temperature (°C)                 | -132       | -132   | 0      | -132       | -132   | 0      | -132.1631  | -132.4 | 0.18   |
| Pressure (kg/cm <sup>2</sup> _g) | 30.71      | 30.71  | 0      | 30.56      | 30.56  | 0      | 30.51      | 30.51  | 0      |
| Component Properties             | 4009       |        |        | 4011       |        |        | 4002       |        |        |
|                                  | Simulation | Design | %Error | Simulation | Design | %Error | Simulation | Design | %Error |
| Hydrogen                         |            |        |        | 0.9651     | 0.965  | 0.0    | 0.9653     | 0.9653 | 0.0    |
| Carbon Monoxide                  |            |        |        |            |        |        | 0.0026     | 0.0026 | 0.0    |
| Carbon Dioxide                   |            |        |        |            |        |        |            |        |        |
| Hydrogen Sulfide                 |            |        |        |            |        |        |            |        |        |
| Methane                          |            |        |        | 0.034      | 0.0341 | 0.3    | 0.0312     | 0.0312 | 0.0    |
| Acetylene                        |            |        |        |            |        |        |            |        |        |
| Ethylene                         |            |        |        |            |        |        |            |        |        |
| Ethane                           |            |        |        |            |        |        |            |        |        |
| Propadiene/Methylacetylene       |            |        |        |            |        |        |            |        |        |
| Propylene                        |            |        |        |            |        |        |            |        |        |
| Propane                          |            |        |        |            |        |        |            |        |        |
| Butadiene/C4 Acetylene           |            |        |        |            |        |        |            |        |        |
| Butylenes                        |            |        |        |            |        |        |            |        |        |

# Simulation Report – ECC 860 KTA

## Working Stage 6

|                                  |            |        |        |            |        |        |            |        |        |
|----------------------------------|------------|--------|--------|------------|--------|--------|------------|--------|--------|
| Butanes                          |            |        |        |            |        |        |            |        |        |
| C5 Hydrocarbons                  |            |        |        |            |        |        |            |        |        |
| C6 Non Aromatics                 |            |        |        |            |        |        |            |        |        |
| C7 Non Aromatics                 |            |        |        |            |        |        |            |        |        |
| C8 Non Aromatics                 |            |        |        |            |        |        |            |        |        |
| Benzene                          |            |        |        |            |        |        |            |        |        |
| Toluene                          |            |        |        |            |        |        |            |        |        |
| Xylene/Ethylbenzene              |            |        |        |            |        |        |            |        |        |
| Styrene                          |            |        |        |            |        |        |            |        |        |
| C9                               |            |        |        |            |        |        |            |        |        |
| 204 288 C (PGO)                  |            |        |        |            |        |        |            |        |        |
| 288 C Plus (PFO)                 |            |        |        |            |        |        |            |        |        |
| Steam/Water                      | 1          | 1      | 0.0    |            |        |        |            |        |        |
| Nitrogen                         |            |        |        | 0.0009     | 0.0009 | 0.0    | 0.0009     | 0.0009 | 0.0    |
| Naphtha                          |            |        |        |            |        |        |            |        |        |
| Mass Flow (kg/h)                 | 44.9348    | 45     | 0.14   | 364        | 364    | 0      | 3171       | 3171   | 0      |
| Molar Flow (kmole/h)             | 2.4943     | 2.5    | 0.23   | 144.6418   | 144.5  | 0.1    | 1246.8058  | 1246.6 | 0.02   |
| Temperature (°C)                 | 14.94      | 16     | 6.62   | 16         | 16     | 0      | 288        | 288    | 0      |
| Pressure (kg/cm <sup>2</sup> _g) | 31.42      | 31.36  | 0.19   | 31.11      | 31.07  | 0.13   | 32.11      | 32.11  | 0      |
| Component Properties             | 4021       |        |        | 4017       |        |        | 1102       |        |        |
|                                  | Simulation | Design | %Error | Simulation | Design | %Error | Simulation | Design | %Error |
| Hydrogen                         | 0.0068     | 0.0114 | 40.4   | 0.9651     | 0.965  | 0.0    | 0.9651     | 0.965  | 0.0    |
| Carbon Monoxide                  |            |        |        |            |        |        |            |        |        |
| Carbon Dioxide                   |            |        |        |            |        |        |            |        |        |
| Hydrogen Sulfide                 |            |        |        |            |        |        |            |        |        |
| Methane                          | 0.0381     | 0.0379 | 0.5    | 0.034      | 0.0341 | 0.3    | 0.034      | 0.0341 | 0.3    |
| Acetylene                        |            |        |        |            |        |        |            |        |        |
| Ethylene                         | 0.0048     | 0.0047 | 2.1    |            |        |        |            |        |        |
| Ethane                           | 0.9453     | 0.9411 | 0.4    |            |        |        |            |        |        |
| Propadiene/Methylacetylene       |            |        |        |            |        |        |            |        |        |
| Propylene                        | 0.0048     | 0.0048 | 0.0    |            |        |        |            |        |        |
| Propane                          |            |        |        |            |        |        |            |        |        |
| Butadiene/C4 Acetylene           |            |        |        |            |        |        |            |        |        |
| Butylenes                        |            |        |        |            |        |        |            |        |        |
| Butanes                          |            |        |        |            |        |        |            |        |        |
| C5 Hydrocarbons                  |            |        |        |            |        |        |            |        |        |
| C6 Non Aromatics                 |            |        |        |            |        |        |            |        |        |
| C7 Non Aromatics                 |            |        |        |            |        |        |            |        |        |
| C8 Non Aromatics                 |            |        |        |            |        |        |            |        |        |
| Benzene                          |            |        |        |            |        |        |            |        |        |
| Toluene                          |            |        |        |            |        |        |            |        |        |
| Xylene/Ethylbenzene              |            |        |        |            |        |        |            |        |        |
| Styrene                          |            |        |        |            |        |        |            |        |        |
| C9                               |            |        |        |            |        |        |            |        |        |
| 204 288 C (PGO)                  |            |        |        |            |        |        |            |        |        |
| 288 C Plus (PFO)                 |            |        |        |            |        |        |            |        |        |
| Steam/Water                      |            |        |        |            |        |        |            |        |        |
| Nitrogen                         | 0.0001     | 0.0001 | 0.0    | 0.0009     | 0.0009 | 0.0    | 0.0009     | 0.0009 | 0.0    |
| Naphtha                          |            |        |        |            |        |        |            |        |        |
| Mass Flow (kg/h)                 | 3798.0991  | 3798   | 0      | 234        | 234    | 0      | 1745.6311  | 1747   | 0.08   |
| Molar Flow (kmole/h)             | 129.2175   | 129.8  | 0.45   | 92.984     | 92.8   | 0.2    | 693.6571   | 693.9  | 0.04   |
| Temperature (°C)                 | -128.661   | -129.3 | 0.49   | 16         | 16     | 0      | 16         | 16     | 0      |
| Pressure (kg/cm <sup>2</sup> _g) | 30.69      | 30.69  | 0      | 31.11      | 31.07  | 0.13   | 31.11      | 31.07  | 0.13   |
| Component Properties             | 4007       |        |        | 4022       |        |        | 4008       |        |        |
|                                  | Simulation | Design | %Error | Simulation | Design | %Error | Simulation | Design | %Error |
| Hydrogen                         | 0.9626     | 0.9626 | 0.0    | 0.9626     | 0.9626 | 0.0    | 0.9645     | 0.9645 | 0.0    |
| Carbon Monoxide                  |            |        |        |            |        |        |            |        |        |
| Carbon Dioxide                   |            |        |        |            |        |        |            |        |        |

# Simulation Report – ECC 860 KTA

## Working Stage 6

|                                  |            |        |        |            |        |        |            |        |        |
|----------------------------------|------------|--------|--------|------------|--------|--------|------------|--------|--------|
| Hydrogen Sulfide                 |            |        |        |            |        |        |            |        |        |
| Methane                          | 0.034      | 0.034  | 0.0    | 0.034      | 0.034  | 0.0    | 0.034      | 0.034  | 0.0    |
| Acetylene                        |            |        |        |            |        |        |            |        |        |
| Ethylene                         |            |        |        |            |        |        |            |        |        |
| Ethane                           |            |        |        |            |        |        |            |        |        |
| Propadiene/Methylacetylene       |            |        |        |            |        |        |            |        |        |
| Propylene                        |            |        |        |            |        |        |            |        |        |
| Propane                          |            |        |        |            |        |        |            |        |        |
| Butadiene/C4 Acetylene           |            |        |        |            |        |        |            |        |        |
| Butylenes                        |            |        |        |            |        |        |            |        |        |
| Butanes                          |            |        |        |            |        |        |            |        |        |
| C5 Hydrocarbons                  |            |        |        |            |        |        |            |        |        |
| C6 Non Aromatics                 |            |        |        |            |        |        |            |        |        |
| C7 Non Aromatics                 |            |        |        |            |        |        |            |        |        |
| C8 Non Aromatics                 |            |        |        |            |        |        |            |        |        |
| Benzene                          |            |        |        |            |        |        |            |        |        |
| Toluene                          |            |        |        |            |        |        |            |        |        |
| Xylene/Ethylbenzene              |            |        |        |            |        |        |            |        |        |
| Styrene                          |            |        |        |            |        |        |            |        |        |
| C9                               |            |        |        |            |        |        |            |        |        |
| 204 288 C (PGO)                  |            |        |        |            |        |        |            |        |        |
| 288 C Plus (PFO)                 |            |        |        |            |        |        |            |        |        |
| Steam/Water                      | 0.0026     | 0.0026 | 0.0    | 0.0026     | 0.0026 | 0.0    | 0.0006     | 0.0006 | 0.0    |
| Nitrogen                         | 0.0009     | 0.0009 | 0.0    | 0.0009     | 0.0009 | 0.0    | 0.0009     | 0.0009 | 0.0    |
| Naphtha                          |            |        |        |            |        |        |            |        |        |
| Mass Flow (kg/h)                 | 3170.9971  | 3171   | 0      | 3170.9971  | 3171   | 0      | 3126.0646  | 3126   | 0      |
| Molar Flow (kmole/h)             | 1240.4357  | 1240.2 | 0.02   | 1240.4357  | 1240.2 | 0.02   | 1237.9414  | 1237.7 | 0.02   |
| Temperature (°C)                 | 41         | 41     | 0      | 14.94      | 16     | 6.62   | 14.94      | 16     | 6.62   |
| Pressure (kg/cm <sup>2</sup> _g) | 31.53      | 31.53  | 0      | 31.42      | 31.42  | 0      | 31.42      | 31.36  | 0.19   |
| Component Properties             | 4003       |        |        | 4004       |        |        | 4005       |        |        |
|                                  | Simulation | Design | %Error | Simulation | Design | %Error | Simulation | Design | %Error |
| Hydrogen                         | 0.9653     | 0.9653 | 0.0    | 0.9626     | 0.9626 | 0.0    | 0.9626     | 0.9626 | 0.0    |
| Carbon Monoxide                  | 0.0026     | 0.0026 | 0.0    |            |        |        |            |        |        |
| Carbon Dioxide                   |            |        |        |            |        |        |            |        |        |
| Hydrogen Sulfide                 |            |        |        |            |        |        |            |        |        |
| Methane                          | 0.0312     | 0.0312 | 0.0    | 0.034      | 0.034  | 0.0    | 0.034      | 0.034  | 0.0    |
| Acetylene                        |            |        |        |            |        |        |            |        |        |
| Ethylene                         |            |        |        |            |        |        |            |        |        |
| Ethane                           |            |        |        |            |        |        |            |        |        |
| Propadiene/Methylacetylene       |            |        |        |            |        |        |            |        |        |
| Propylene                        |            |        |        |            |        |        |            |        |        |
| Propane                          |            |        |        |            |        |        |            |        |        |
| Butadiene/C4 Acetylene           |            |        |        |            |        |        |            |        |        |
| Butylenes                        |            |        |        |            |        |        |            |        |        |
| Butanes                          |            |        |        |            |        |        |            |        |        |
| C5 Hydrocarbons                  |            |        |        |            |        |        |            |        |        |
| C6 Non Aromatics                 |            |        |        |            |        |        |            |        |        |
| C7 Non Aromatics                 |            |        |        |            |        |        |            |        |        |
| C8 Non Aromatics                 |            |        |        |            |        |        |            |        |        |
| Benzene                          |            |        |        |            |        |        |            |        |        |
| Toluene                          |            |        |        |            |        |        |            |        |        |
| Xylene/Ethylbenzene              |            |        |        |            |        |        |            |        |        |
| Styrene                          |            |        |        |            |        |        |            |        |        |
| C9                               |            |        |        |            |        |        |            |        |        |
| 204 288 C (PGO)                  |            |        |        |            |        |        |            |        |        |
| 288 C Plus (PFO)                 |            |        |        |            |        |        |            |        |        |
| Steam/Water                      |            |        |        | 0.0026     | 0.0026 | 0.0    | 0.0026     | 0.0026 | 0.0    |
| Nitrogen                         | 0.0009     | 0.0009 | 0.0    | 0.0009     | 0.0009 | 0.0    | 0.0009     | 0.0009 | 0.0    |

# Simulation Report – ECC 860 KTA

## Working Stage 6

|                                  |            |        |        |            |        |        |           |        |      |
|----------------------------------|------------|--------|--------|------------|--------|--------|-----------|--------|------|
| Naphtha                          |            |        |        |            |        |        |           |        |      |
| Mass Flow (kg/h)                 | 3171       | 3171   | 0      | 3170.9971  | 3171   | 0      | 3170.9971 | 3171   | 0    |
| Molar Flow (kmole/h)             | 1246.8058  | 1246.6 | 0.02   | 1240.4357  | 1240.2 | 0.02   | 1240.4357 | 1240.2 | 0.02 |
| Temperature (°C)                 | 288        | 288    | 0      | 320.9991   | 321    | 0      | 68.261    | 67.9   | 0.53 |
| Pressure (kg/cm <sup>2</sup> _g) | 32         | 32     | 0      | 31.75      | 31.75  | 0      | 31.64     | 31.64  | 0    |
| Component Properties             | 4019       |        |        | 4020       |        |        |           |        |      |
|                                  | Simulation | Design | %Error | Simulation | Design | %Error |           |        |      |
| Hydrogen                         | 0.9645     | 0.9645 | 0.0    | 0.9651     | 0.965  | 0.0    |           |        |      |
| Carbon Monoxide                  |            |        |        |            |        |        |           |        |      |
| Carbon Dioxide                   |            |        |        |            |        |        |           |        |      |
| Hydrogen Sulfide                 |            |        |        |            |        |        |           |        |      |
| Methane                          | 0.034      | 0.034  | 0.0    | 0.034      | 0.0341 | 0.3    |           |        |      |
| Acetylene                        |            |        |        |            |        |        |           |        |      |
| Ethylene                         |            |        |        |            |        |        |           |        |      |
| Ethane                           |            |        |        |            |        |        |           |        |      |
| Propadiene/Methylacetylene       |            |        |        |            |        |        |           |        |      |
| Propylene                        |            |        |        |            |        |        |           |        |      |
| Propane                          |            |        |        |            |        |        |           |        |      |
| Butadiene/C4 Acetylene           |            |        |        |            |        |        |           |        |      |
| Butylenes                        |            |        |        |            |        |        |           |        |      |
| Butanes                          |            |        |        |            |        |        |           |        |      |
| C5 Hydrocarbons                  |            |        |        |            |        |        |           |        |      |
| C6 Non Aromatics                 |            |        |        |            |        |        |           |        |      |
| C7 Non Aromatics                 |            |        |        |            |        |        |           |        |      |
| C8 Non Aromatics                 |            |        |        |            |        |        |           |        |      |
| Benzene                          |            |        |        |            |        |        |           |        |      |
| Toluene                          |            |        |        |            |        |        |           |        |      |
| Xylene/Ethylbenzene              |            |        |        |            |        |        |           |        |      |
| Styrene                          |            |        |        |            |        |        |           |        |      |
| C9                               |            |        |        |            |        |        |           |        |      |
| 204 288 C (PGO)                  |            |        |        |            |        |        |           |        |      |
| 288 C Plus (PFO)                 |            |        |        |            |        |        |           |        |      |
| Steam/Water                      | 0.0006     | 0.0006 | 0.0    |            |        |        |           |        |      |
| Nitrogen                         | 0.0009     | 0.0009 | 0.0    | 0.0009     | 0.0009 | 0.0    |           |        |      |
| Naphtha                          |            |        |        |            |        |        |           |        |      |
| Mass Flow (kg/h)                 | 2353       | 2353   | 0      | 2343.6311  | 2344   | 0.02   |           |        |      |
| Molar Flow (kmole/h)             | 931.8029   | 931.6  | 0.02   | 931.2829   | 931.1  | 0.02   |           |        |      |
| Temperature (°C)                 | 14.94      | 16     | 6.62   | 16         | 16     | 0      |           |        |      |
| Pressure (kg/cm <sup>2</sup> _g) | 31.42      | 31.36  | 0.19   | 31.11      | 31.11  | 0      |           |        |      |

**Table A.3.3. Deethanizer Stream Properties**

|                            |       |       |      |       |       |      |       |       |      |
|----------------------------|-------|-------|------|-------|-------|------|-------|-------|------|
| Hydrogen                   |       |       |      |       |       |      | 99.71 | 99.70 | 0.01 |
| Carbon Monoxide            |       |       |      |       |       |      |       |       |      |
| Carbon Dioxide             |       |       |      |       |       |      |       |       |      |
| Hydrogen Sulfide           |       |       |      |       |       |      |       |       |      |
| Methane                    | 0.01  | 0.01  | 0.00 | 0.01  | 0.01  | 0.00 |       |       |      |
| Acetylene                  | 1.09  | 1.09  | 0.00 | 1.09  | 1.09  | 0.00 |       |       |      |
| Ethylene                   | 60.90 | 60.91 | 0.02 | 60.9  | 60.91 | 0.02 |       |       |      |
| Ethane                     | 10.47 | 10.47 | 0.00 | 10.47 | 10.47 | 0.00 | 0.2   | 0.20  | 0.00 |
| Propadiene/Methylacetylene | 0.80  | 0.81  | 1.23 | 0.81  | 0.81  | 0.00 |       |       |      |
| Propylene                  | 19.58 | 19.58 | 0.00 | 19.58 | 19.58 | 0.00 |       |       |      |
| Propane                    | 0.58  | 0.59  | 1.69 | 0.59  | 0.59  | 0.00 |       |       |      |
| Butadiene/C4 Acetylene     | 2.14  | 2.14  | 0.00 | 2.14  | 2.14  | 0.00 |       |       |      |
| Butylenes                  | 3.06  | 3.05  | 0.33 | 3.05  | 3.05  | 0.00 |       |       |      |
| Butanes                    | 0.97  | 0.96  | 1.04 | 0.96  | 0.96  | 0.00 |       |       |      |
| C5 Hydrocarbons            | 0.35  | 0.35  | 0.00 | 0.35  | 0.35  | 0.00 |       |       |      |
| C6 Non Aromatics           | 0.01  | 0.01  | 0.00 | 0.01  | 0.01  | 0.00 |       |       |      |
| C7 Non Aromatics           |       |       |      |       |       |      |       |       |      |



# Simulation Report – ECC 860 KTA

## Working Stage 6

|                                  |            |        |        |            |        |        |            |        |        |
|----------------------------------|------------|--------|--------|------------|--------|--------|------------|--------|--------|
| C8 Non Aromatics                 |            |        |        |            |        |        |            |        |        |
| Benzene                          | 0.04       | 0.04   | 0.00   | 0.04       | 0.04   | 0.00   |            |        |        |
| Toluene                          |            |        |        |            |        |        |            |        |        |
| Xylene/Ethylbenzene              |            |        |        |            |        |        |            |        |        |
| Styrene                          |            |        |        |            |        |        |            |        |        |
| C9                               |            |        |        |            |        |        |            |        |        |
| 204 288 C (PGO)                  |            |        |        |            |        |        |            |        |        |
| 288 C Plus (PFO)                 |            |        |        |            |        |        |            |        |        |
| Steam/Water                      |            |        |        |            |        |        |            |        |        |
| Nitrogen                         |            |        |        |            |        |        | 0.09       | 0.09   | 0.00   |
| Naphtha                          |            |        |        |            |        |        |            |        |        |
| Mass Flow (kg/h)                 | 58145      | 58145  | 0      | 135671     | 135671 | 0      | 191        | 190    | 0.53   |
| Molar Flow (kmole/h)             | 1758.657   | 1759.2 | 0.03   | 4103.6684  | 4104.8 | 0.03   | 91.1423    | 90.7   | 0.49   |
| Temperature (°C)                 | -14        | -14    | 0      | 14.8       | 14.8   | 0      | 35         | 35     | 0      |
| Pressure (kg/cm <sup>2</sup> _g) | 21.68      | 21.68  | 0      | 21.95      | 21.95  | 0      | 30.13      | 30.13  | 0      |
| Component Properties             | 4205       |        |        | 4207       |        |        | 4213       |        |        |
|                                  | Simulation | Design | %Error | Simulation | Design | %Error | Simulation | Design | %Error |
| Hydrogen                         |            |        |        |            |        |        |            |        |        |
| Carbon Monoxide                  |            |        |        |            |        |        |            |        |        |
| Carbon Dioxide                   |            |        |        |            |        |        |            |        |        |
| Hydrogen Sulfide                 |            |        |        |            |        |        |            |        |        |
| Methane                          |            |        |        |            |        |        |            |        |        |
| Acetylene                        | 1.45       | 1.42   | 2.11   |            |        |        | 1.45       | 1.42   | 2.11   |
| Ethylene                         | 83.58      | 83.64  | 0.07   |            |        |        | 83.58      | 83.64  | 0.07   |
| Ethane                           | 14.85      | 14.83  | 0.13   |            |        |        | 14.85      | 14.83  | 0.13   |
| Propadiene/Methylacetylene       |            |        |        | 2.94       | 2.93   | 0.34   |            |        |        |
| Propylene                        | 0.11       | 0.09   | 22.22  | 71.04      | 71.09  | 0.07   | 0.11       | 0.09   | 22.22  |
| Propane                          |            |        |        | 2.15       | 2.14   | 0.47   |            |        |        |
| Butadiene/C4 Acetylene           |            |        |        | 7.79       | 7.79   | 0.00   |            |        |        |
| Butylenes                        |            |        |        | 11.12      | 11.12  | 0.00   |            |        |        |
| Butanes                          |            |        |        | 3.50       | 3.50   | 0.00   |            |        |        |
| C5 Hydrocarbons                  |            |        |        | 1.27       | 1.26   | 0.79   |            |        |        |
| C6 Non Aromatics                 |            |        |        | 0.04       | 0.03   | 33.33  |            |        |        |
| C7 Non Aromatics                 |            |        |        |            |        |        |            |        |        |
| C8 Non Aromatics                 |            |        |        |            |        |        |            |        |        |
| Benzene                          |            |        |        | 0.14       | 0.13   | 7.69   |            |        |        |
| Toluene                          |            |        |        |            |        |        |            |        |        |
| Xylene/Ethylbenzene              |            |        |        |            |        |        |            |        |        |
| Styrene                          |            |        |        |            |        |        |            |        |        |
| C9                               |            |        |        |            |        |        |            |        |        |
| 204 288 C (PGO)                  |            |        |        |            |        |        |            |        |        |
| 288 C Plus (PFO)                 |            |        |        |            |        |        |            |        |        |
| Steam/Water                      |            |        |        |            |        |        |            |        |        |
| Nitrogen                         |            |        |        |            |        |        |            |        |        |
| Naphtha                          |            |        |        |            |        |        |            |        |        |
| Mass Flow (kg/h)                 | 127154.7   | 127117 | 0.03   | 73353.9547 | 73354  | 0      | 127118     | 127118 | 0      |
| Molar Flow (kmole/h)             | 4487.016   | 4486.3 | 0.02   | 1609.6977  | 1610.9 | 0.07   | 4485.7225  | 4486.3 | 0.01   |
| Temperature (°C)                 | -21.9599   | -21.4  | 2.62   | 66.252     | 66.2   | 0.08   | -21.9599   | -22.7  | 3.26   |
| Pressure (kg/cm <sup>2</sup> _g) | 21.31      | 21.31  | 0      | 22.05      | 22.05  | 0      | 21.31      | 20.59  | 3.5    |
| Component Properties             | 4145       |        |        | 4315       |        |        | 4208       |        |        |
|                                  | Simulation | Design | %Error | Simulation | Design | %Error | Simulation | Design | %Error |
| Hydrogen                         | 96.52      | 96.51  | 0.01   |            |        |        |            |        |        |
| Carbon Monoxide                  | 0.26       | 0.26   | 0.00   |            |        |        |            |        |        |
| Carbon Dioxide                   |            |        |        |            |        |        |            |        |        |
| Hydrogen Sulfide                 |            |        |        |            |        |        |            |        |        |

# Simulation Report – ECC 860 KTA

## Working Stage 6

|                            |            |        |        |            |        |        |            |        |        |
|----------------------------|------------|--------|--------|------------|--------|--------|------------|--------|--------|
| Methane                    | 3.13       | 3.13   | 0.00   |            |        |        |            |        |        |
| Acetylene                  |            |        |        |            |        |        |            |        |        |
| Ethylene                   |            |        |        | 77.09      | 77.09  | 0.00   |            |        |        |
| Ethane                     |            |        |        | 22.87      | 22.87  | 0.00   | 0.01       | 0.00   | 100.00 |
| Propadiene/Methylacetylene |            |        |        |            |        |        | 2.94       | 2.93   | 0.34   |
| Propylene                  |            |        |        | 0.04       | 0.04   | 0.00   | 71.04      | 71.09  | 0.07   |
| Propane                    |            |        |        |            |        |        | 2.14       | 2.14   | 0.00   |
| Butadiene/C4 Acetylene     |            |        |        |            |        |        | 7.79       | 7.79   | 0.00   |
| Butylenes                  |            |        |        |            |        |        | 11.12      | 11.12  | 0.00   |
| Butanes                    |            |        |        |            |        |        | 3.5        | 3.50   | 0.00   |
| C5 Hydrocarbons            |            |        |        |            |        |        | 1.27       | 1.26   | 0.79   |
| C6 Non Aromatics           |            |        |        |            |        |        | 0.04       | 0.03   | 33.33  |
| C7 Non Aromatics           |            |        |        |            |        |        |            |        |        |
| C8 Non Aromatics           |            |        |        |            |        |        |            |        |        |
| Benzene                    |            |        |        |            |        |        | 0.14       | 0.13   | 7.69   |
| Toluene                    |            |        |        |            |        |        |            |        |        |
| Xylene/Ethylbenzene        |            |        |        |            |        |        |            |        |        |
| Styrene                    |            |        |        |            |        |        |            |        |        |
| C9                         |            |        |        |            |        |        |            |        |        |
| 204 288 C (PGO)            |            |        |        |            |        |        |            |        |        |
| 288 C Plus (PFO)           |            |        |        |            |        |        |            |        |        |
| Steam/Water                |            |        |        |            |        |        |            |        |        |
| Nitrogen                   | 0.09       | 0.09   | 0.00   |            |        |        |            |        |        |
| Naphtha                    |            |        |        |            |        |        |            |        |        |
| Mass Flow (kg/h)           | 17         | 17     | 0      | 18185.2062 | 18202  | 0.09   | 73353.9547 | 73354  | 0      |
| Molar Flow (kmole/h)       | 6.6757     | 6.5    | 2.7    | 638.2      | 638.2  | 0      | 1609.6977  | 1610.9 | 0.07   |
| Temperature (°C)           | 35         | 35     | 0      | -29.7      | -29.7  | 0      | 54.8       | 54.8   | 0      |
| Pressure (kg/cm²_g)        | 32.22      | 32.22  | 0      | 17.38      | 17.13  | 1.46   | 16.96      | 16.96  | 0      |
| Component Properties       | 4229       |        |        | 4230       |        |        | 4231       |        |        |
|                            | Simulation | Design | %Error | Simulation | Design | %Error | Simulation | Design | %Error |
| Hydrogen                   | 99.71      | 99.70  | 0.01   | 96.52      | 96.52  | 0.00   | 99.51      | 99.49  | 0.02   |
| Carbon Monoxide            |            |        |        | 0.26       | 0.26   | 0.00   | 0.02       | 0.02   | 0.00   |
| Carbon Dioxide             |            |        |        |            |        |        |            |        |        |
| Hydrogen Sulfide           |            |        |        |            |        |        |            |        |        |
| Methane                    |            |        |        |            |        |        |            |        |        |
| Acetylene                  |            |        |        |            |        |        |            |        |        |
| Ethylene                   |            |        |        |            |        |        |            |        |        |
| Ethane                     | 0.20       | 0.20   | 0.00   |            |        |        | 0.19       | 0.18   | 5.56   |
| Propadiene/Methylacetylene |            |        |        |            |        |        |            |        |        |
| Propylene                  |            |        |        |            |        |        |            |        |        |
| Propane                    |            |        |        |            |        |        |            |        |        |
| Butadiene/C4 Acetylene     |            |        |        |            |        |        |            |        |        |
| Butylenes                  |            |        |        |            |        |        |            |        |        |
| Butanes                    |            |        |        |            |        |        |            |        |        |
| C5 Hydrocarbons            |            |        |        |            |        |        |            |        |        |
| C6 Non Aromatics           |            |        |        |            |        |        |            |        |        |
| C7 Non Aromatics           |            |        |        |            |        |        |            |        |        |
| C8 Non Aromatics           |            |        |        |            |        |        |            |        |        |
| Benzene                    |            |        |        |            |        |        |            |        |        |
| Toluene                    |            |        |        |            |        |        |            |        |        |
| Xylene/Ethylbenzene        |            |        |        |            |        |        |            |        |        |
| Styrene                    |            |        |        |            |        |        |            |        |        |
| C9                         |            |        |        |            |        |        |            |        |        |
| 204 288 C (PGO)            |            |        |        |            |        |        |            |        |        |
| 288 C Plus (PFO)           |            |        |        |            |        |        |            |        |        |
| Steam/Water                |            |        |        |            |        |        |            |        |        |
| Nitrogen                   | 0.09       | 0.09   | 0.00   | 0.09       | 0.09   | 0.00   | 0.09       | 0.09   | 0.00   |

# Simulation Report – ECC 860 KTA

## Working Stage 6

|                                  |            |        |        |            |        |        |            |        |        |
|----------------------------------|------------|--------|--------|------------|--------|--------|------------|--------|--------|
| Naphtha                          |            |        |        |            |        |        |            |        |        |
| Mass Flow (kg/h)                 | 85         | 85     | 0      | 7          | 7      | 0      | 92         | 92     | 0      |
| Molar Flow (kmole/h)             | 40.5607    | 40.4   | 0.4    | 2.7488     | 2.9    | 5.21   | 43.3095    | 43.3   | 0.02   |
| Temperature (°C)                 | 35         | 35     | 0      | 35         | 35     | 0      | 35.0022    | 35.2   | 0.56   |
| Pressure (kg/cm <sup>2</sup> _g) | 30.13      | 29.74  | 1.31   | 32.22      | 31.83  | 1.23   | 30.13      | 20.57  | 46.48  |
| Component Properties             | 4215       |        |        | 4216       |        |        | 4217       |        |        |
|                                  | Simulation | Design | %Error | Simulation | Design | %Error | Simulation | Design | %Error |
| Hydrogen                         | 0.95       | 0.95   | 0.00   | 0.95       | 0.95   | 0.00   | 0.00       | 0.01   | 100.00 |
| Carbon Monoxide                  |            |        |        |            |        |        |            |        |        |
| Carbon Dioxide                   |            |        |        |            |        |        |            |        |        |
| Hydrogen Sulfide                 |            |        |        |            |        |        |            |        |        |
| Methane                          | 0.01       | 0.02   | 50.00  | 0.01       | 0.02   | 50.00  | 0.01       | 0.02   | 50.00  |
| Acetylene                        | 1.43       | 1.41   | 1.42   | 1.43       | 1.41   | 1.42   | 0.98       | 0.79   | 24.05  |
| Ethylene                         | 82.78      | 82.84  | 0.07   | 82.78      | 82.84  | 0.07   | 83.55      | 83.94  | 0.46   |
| Ethane                           | 14.71      | 14.69  | 0.14   | 14.71      | 14.69  | 0.14   | 15.34      | 15.15  | 1.25   |
| Propadiene/Methylacetylene       |            |        |        |            |        |        |            |        |        |
| Propylene                        | 0.11       | 0.09   | 22.22  | 0.11       | 0.09   | 22.22  | 0.11       | 0.09   | 22.22  |
| Propane                          |            |        |        |            |        |        |            |        |        |
| Butadiene/C4 Acetylene           |            |        |        |            |        |        |            |        |        |
| Butylenes                        |            |        |        |            |        |        |            |        |        |
| Butanes                          |            |        |        |            |        |        |            |        |        |
| C5 Hydrocarbons                  |            |        |        |            |        |        |            |        |        |
| C6 Non Aromatics                 |            |        |        |            |        |        |            |        |        |
| C7 Non Aromatics                 |            |        |        |            |        |        |            |        |        |
| C8 Non Aromatics                 |            |        |        |            |        |        |            |        |        |
| Benzene                          |            |        |        |            |        |        |            |        |        |
| Toluene                          |            |        |        |            |        |        |            |        |        |
| Xylene/Ethylbenzene              |            |        |        |            |        |        |            |        |        |
| Styrene                          |            |        |        |            |        |        |            |        |        |
| C9                               |            |        |        |            |        |        |            |        |        |
| 204 288 C (PGO)                  |            |        |        |            |        |        |            |        |        |
| 288 C Plus (PFO)                 |            |        |        |            |        |        |            |        |        |
| Steam/Water                      |            |        |        |            |        |        |            |        |        |
| Nitrogen                         |            |        |        |            |        |        |            |        |        |
| Naphtha                          |            |        |        |            |        |        |            |        |        |
| Mass Flow (kg/h)                 | 127210     | 127210 | 0      | 127210     | 127210 | 0      | 127209.998 | 127210 | 0      |
| Molar Flow (kmole/h)             | 4529.032   | 4529.5 | 0.01   | 4529.032   | 4529.5 | 0.01   | 4485.9361  | 4486.9 | 0.02   |
| Temperature (°C)                 | 25.4       | 25.4   | 0      | 46.5       | 46.5   | 0      | 74         | 74     | 0      |
| Pressure (kg/cm <sup>2</sup> _g) | 20.39      | 20.39  | 0      | 20.1861    | 20.29  | 0.51   | 19.72      | 19.72  | 0      |
| Component Properties             | 4218       |        |        | 4219       |        |        | 4220       |        |        |
|                                  | Simulation | Design | %Error | Simulation | Design | %Error | Simulation | Design | %Error |
| Hydrogen                         | 0.96       | 0.96   | 0.00   | 0.96       | 0.96   | 0.00   | 0.02       | 0.02   | 0.00   |
| Carbon Monoxide                  |            |        |        |            |        |        |            |        |        |
| Carbon Dioxide                   |            |        |        |            |        |        |            |        |        |
| Hydrogen Sulfide                 |            |        |        |            |        |        |            |        |        |
| Methane                          | 0.02       | 0.02   | 0.00   | 0.02       | 0.02   | 0.00   | 0.02       | 0.02   | 0.00   |
| Acetylene                        | 0.97       | 0.78   | 24.36  | 0.97       | 0.78   | 24.36  |            |        |        |
| Ethylene                         | 82.74      | 83.14  | 0.48   | 82.74      | 83.14  | 0.48   | 83.27      | 84.32  | 1.25   |
| Ethane                           | 15.19      | 15.01  | 1.20   | 15.19      | 15.01  | 1.20   | 16.08      | 15.54  | 3.47   |
| Propadiene/Methylacetylene       |            |        |        |            |        |        |            |        |        |
| Propylene                        | 0.11       | 0.09   | 22.22  | 0.11       | 0.09   | 22.22  | 0.11       | 0.09   | 22.22  |
| Propane                          |            |        |        |            |        |        |            |        |        |
| Butadiene/C4 Acetylene           |            |        |        |            |        |        |            |        |        |
| Butylenes                        |            |        |        |            |        |        |            |        |        |
| Butanes                          |            |        |        |            |        |        |            |        |        |
| C5 Hydrocarbons                  |            |        |        |            |        |        |            |        |        |

# Simulation Report – ECC 860 KTA

## Working Stage 6

|                                  |            |                    |        |            |                    |        |             |                    |        |
|----------------------------------|------------|--------------------|--------|------------|--------------------|--------|-------------|--------------------|--------|
| C6 Non Aromatics                 |            |                    |        |            |                    |        |             |                    |        |
| C7 Non Aromatics                 |            |                    |        |            |                    |        |             |                    |        |
| C8 Non Aromatics                 |            |                    |        |            |                    |        |             |                    |        |
| Benzene                          |            |                    |        |            |                    |        |             |                    |        |
| Toluene                          |            |                    |        |            |                    |        |             |                    |        |
| Xylene/Ethylbenzene              |            |                    |        |            |                    |        |             |                    |        |
| Styrene                          |            |                    |        |            |                    |        |             |                    |        |
| C9                               |            |                    |        |            |                    |        |             |                    |        |
| 204 288 C (PGO)                  |            |                    |        |            |                    |        |             |                    |        |
| 288 C Plus (PFO)                 |            |                    |        |            |                    |        |             |                    |        |
| Steam/Water                      |            |                    |        |            |                    |        |             |                    |        |
| Nitrogen                         |            |                    |        |            |                    |        |             |                    |        |
| Naphtha                          |            |                    |        |            |                    |        |             |                    |        |
| Mass Flow (kg/h)                 | 127303     | 12730 <sub>2</sub> | 0      | 127302.998 | 12730 <sub>2</sub> | 0      | 127325.9971 | 12732 <sub>4</sub> | 0      |
| Molar Flow (kmole/h)             | 4529.638   | 4530.2             | 0.01   | 4529.6382  | 4530.2             | 0.01   | 4486.2198   | 4487.7             | 0.03   |
| Temperature (°C)                 | 73.6519    | 73.5               | 0.21   | 46.5       | 46.5               | 0      | 62.6        | 62.6               | 0      |
| Pressure (kg/cm <sup>2</sup> _g) | 19.72      | 19.6               | 0.61   | 19.47      | 19.47              | 0      | 18.02       | 18.02              | 0      |
| Component Properties             | 4226       |                    |        | 4232       |                    |        | 4233        |                    |        |
|                                  | Simulation | Design             | %Error | Simulation | Design             | %Error | Simulation  | Design             | %Error |
| Hydrogen                         | 0.02       | 0.02               | 0.00   | 99.71      | 99.70              | 0.01   | 96.52       | 96.52              | 0.00   |
| Carbon Monoxide                  |            |                    |        |            |                    |        | 0.26        | 0.26               | 0.00   |
| Carbon Dioxide                   |            |                    |        |            |                    |        |             |                    |        |
| Hydrogen Sulfide                 |            |                    |        |            |                    |        |             |                    |        |
| Methane                          | 0.02       | 0.02               | 0.00   |            |                    |        | 3.13        | 3.13               | 0.00   |
| Acetylene                        |            |                    |        |            |                    |        |             |                    |        |
| Ethylene                         | 82.94      | 83.70              | 0.91   |            |                    |        |             |                    |        |
| Ethane                           | 16.51      | 16.18              | 2.04   | 0.20       | 0.20               | 0.00   |             |                    |        |
| Propadiene/Methylacetylene       |            |                    |        |            |                    |        |             |                    |        |
| Propylene                        | 0.09       | 0.07               | 28.57  |            |                    |        |             |                    |        |
| Propane                          |            |                    |        |            |                    |        |             |                    |        |
| Butadiene/C4 Acetylene           |            |                    |        |            |                    |        |             |                    |        |
| Butylenes                        |            |                    |        |            |                    |        |             |                    |        |
| Butanes                          |            |                    |        |            |                    |        |             |                    |        |
| C5 Hydrocarbons                  |            |                    |        |            |                    |        |             |                    |        |
| C6 Non Aromatics                 |            |                    |        |            |                    |        |             |                    |        |
| C7 Non Aromatics                 |            |                    |        |            |                    |        |             |                    |        |
| C8 Non Aromatics                 |            |                    |        |            |                    |        |             |                    |        |
| Benzene                          |            |                    |        |            |                    |        |             |                    |        |
| Toluene                          |            |                    |        |            |                    |        |             |                    |        |
| Xylene/Ethylbenzene              |            |                    |        |            |                    |        |             |                    |        |
| Styrene                          |            |                    |        |            |                    |        |             |                    |        |
| C9                               |            |                    |        |            |                    |        |             |                    |        |
| 204 288 C (PGO)                  |            |                    |        |            |                    |        |             |                    |        |
| 288 C Plus (PFO)                 |            |                    |        |            |                    |        |             |                    |        |
| Steam/Water                      |            |                    |        |            |                    |        |             |                    |        |
| Nitrogen                         |            |                    |        | 0.09       | 0.09               | 0.00   | 0.09        | 0.09               | 0.00   |
| Naphtha                          |            |                    |        |            |                    |        |             |                    |        |
| Mass Flow (kg/h)                 | 138816     | 13887 <sub>8</sub> | 0.04   | 85         | 85                 | 0      | 8           | 7                  | 14.29  |
| Molar Flow (kmole/h)             | 4889.94    | 4893               | 0.06   | 40.5607    | 40.4               | 0.4    | 3.1415      | 2.9                | 8.33   |
| Temperature (°C)                 | -28.72     | -28.7              | 0.07   | 35         | 35                 | 0      | 35          | 35                 | 0      |
| Pressure (kg/cm <sup>2</sup> _g) | 17.24      | 17.24              | 0      | 30.13      | 29.74              | 1.31   | 32.22       | 31.83              | 1.23   |
| Component Properties             | 4221       |                    |        | 4222       |                    |        | 4223        |                    |        |
|                                  | Simulation | Design             | %Error | Simulation | Design             | %Error | Simulation  | Design             | %Error |
| Hydrogen                         | 0.02       | 0.02               | 0.00   | 0.02       | 0.02               | 0.00   | 0.02        | 0.02               | 0.00   |
| Carbon Monoxide                  |            |                    |        |            |                    |        |             |                    |        |
| Carbon Dioxide                   |            |                    |        |            |                    |        |             |                    |        |

# Simulation Report – ECC 860 KTA

## Working Stage 6

|                                  |            |        |        |             |        |        |             |        |        |
|----------------------------------|------------|--------|--------|-------------|--------|--------|-------------|--------|--------|
| Hydrogen Sulfide                 |            |        |        |             |        |        |             |        |        |
| Methane                          | 0.02       | 0.02   | 0.00   | 0.02        | 0.02   | 0.00   | 0.02        | 0.02   | 0.00   |
| Acetylene                        |            |        |        |             |        |        |             |        |        |
| Ethylene                         | 83.27      | 84.32  | 1.25   | 83.27       | 84.32  | 1.25   | 82.65       | 83.42  | 0.92   |
| Ethane                           | 16.08      | 15.54  | 3.47   | 16.08       | 15.54  | 3.47   | 16.78       | 16.46  | 1.94   |
| Propadiene/Methylacetylene       |            |        |        |             |        |        |             |        |        |
| Propylene                        | 0.11       | 0.09   | 22.22  | 0.11        | 0.09   | 22.22  | 0.10        | 0.08   | 25.00  |
| Propane                          |            |        |        |             |        |        |             |        |        |
| Butadiene/C4 Acetylene           |            |        |        |             |        |        |             |        |        |
| Butylenes                        |            |        |        |             |        |        |             |        |        |
| Butanes                          |            |        |        |             |        |        |             |        |        |
| C5 Hydrocarbons                  |            |        |        |             |        |        |             |        |        |
| C6 Non Aromatics                 |            |        |        |             |        |        |             |        |        |
| C7 Non Aromatics                 |            |        |        |             |        |        |             |        |        |
| C8 Non Aromatics                 |            |        |        |             |        |        |             |        |        |
| Benzene                          |            |        |        |             |        |        |             |        |        |
| Toluene                          |            |        |        |             |        |        |             |        |        |
| Xylene/Ethylbenzene              |            |        |        |             |        |        |             |        |        |
| Styrene                          |            |        |        |             |        |        |             |        |        |
| C9                               |            |        |        |             |        |        |             |        |        |
| 204 288 C (PGO)                  |            |        |        |             |        |        |             |        |        |
| 288 C Plus (PFO)                 |            |        |        |             |        |        |             |        |        |
| Steam/Water                      |            |        |        |             |        |        |             |        |        |
| Nitrogen                         |            |        |        |             |        |        |             |        |        |
| Naphtha                          |            |        |        |             |        |        |             |        |        |
| Mass Flow (kg/h)                 | 127326     | 127324 | 0      | 127325.9971 | 127327 | 0      | 145511.2034 | 145529 | 0.01   |
| Molar Flow (kmole/h)             | 4486.22    | 4487.7 | 0.03   | 4486.2198   | 4487.8 | 0.04   | 5124.4198   | 5126   | 0.03   |
| Temperature (°C)                 | 40.1759    | 40     | 0.44   | -12.1406    | -13.6  | 10.73  | -28.6901    | -28.4  | 1.02   |
| Pressure (kg/cm <sup>2</sup> _g) | 17.85      | 17.85  | 0      | 17.65       | 17.48  | 0.97   | 17.38       | 17.38  | 0      |
| Component Properties             | 4224       |        |        | 4225        |        |        | 4227        |        |        |
|                                  | Simulation | Design | %Error | Simulation  | Design | %Error | Simulation  | Design | %Error |
| Hydrogen                         | 0.00       | 0.02   | 100.00 |             |        |        |             |        |        |
| Carbon Monoxide                  |            |        |        |             |        |        |             |        |        |
| Carbon Dioxide                   |            |        |        |             |        |        |             |        |        |
| Hydrogen Sulfide                 |            |        |        |             |        |        |             |        |        |
| Methane                          | 0.01       | 0.02   | 50.00  |             |        |        |             |        |        |
| Acetylene                        |            |        |        |             |        |        |             |        |        |
| Ethylene                         | 80.92      | 83.70  | 3.32   | 76.67       | 77.49  | 1.06   | 76.69       | 77.49  | 1.03   |
| Ethane                           | 18.60      | 16.18  | 14.96  | 22.47       | 22.18  | 1.31   | 22.45       | 22.18  | 1.22   |
| Propadiene/Methylacetylene       |            |        |        |             |        |        |             |        |        |
| Propylene                        | 0.10       | 0.07   | 42.86  | 0.40        | 0.32   | 25.00  | 0.40        | 0.32   | 25.00  |
| Propane                          |            |        |        |             |        |        |             |        |        |
| Butadiene/C4 Acetylene           |            |        |        |             |        |        |             |        |        |
| Butylenes                        |            |        |        |             |        |        |             |        |        |
| Butanes                          |            |        |        |             |        |        |             |        |        |
| C5 Hydrocarbons                  |            |        |        |             |        |        |             |        |        |
| C6 Non Aromatics                 |            |        |        |             |        |        |             |        |        |
| C7 Non Aromatics                 |            |        |        |             |        |        |             |        |        |
| C8 Non Aromatics                 |            |        |        |             |        |        |             |        |        |
| Benzene                          |            |        |        |             |        |        |             |        |        |
| Toluene                          |            |        |        |             |        |        |             |        |        |
| Xylene/Ethylbenzene              |            |        |        |             |        |        |             |        |        |
| Styrene                          |            |        |        |             |        |        |             |        |        |
| C9                               |            |        |        |             |        |        |             |        |        |
| 204 288 C (PGO)                  |            |        |        |             |        |        |             |        |        |
| 288 C Plus (PFO)                 |            |        |        |             |        |        |             |        |        |

**Simulation Report – ECC 860 KTA**  
**Working Stage 6**

|                                  |             |        |        |             |        |        |           |       |      |
|----------------------------------|-------------|--------|--------|-------------|--------|--------|-----------|-------|------|
| Steam/Water                      |             |        |        |             |        |        |           |       |      |
| Nitrogen                         |             |        |        |             |        |        |           |       |      |
| Naphtha                          |             |        |        |             |        |        |           |       |      |
| Mass Flow (kg/h)                 | 138818.5    | 138878 | 0.04   | 6692.7269   | 6650   | 0.64   | 6692.7269 | 6650  | 0.64 |
| Molar Flow (kmole/h)             | 4890.028    | 4893   | 0.06   | 234.3915    | 233    | 0.6    | 234.3915  | 233   | 0.6  |
| Temperature (°C)                 | -28.6901    | -28.5  | 0.67   | -28.6901    | -28.5  | 0.67   | -27.6568  | -28.5 | 2.96 |
| Pressure (kg/cm <sup>2</sup> _g) | 17.38       | 17.36  | 0.12   | 17.38       | 17.36  | 0.12   | 26.16     | 26.16 | 0    |
| <b>Component Properties</b>      | <b>4234</b> |        |        | <b>4214</b> |        |        |           |       |      |
|                                  | Simulation  | Design | %Error | Simulation  | Design | %Error |           |       |      |
| Hydrogen                         | 99.48       | 99.49  | 0.01   | 0.95        | 0.95   | 0.00   |           |       |      |
| Carbon Monoxide                  | 0.02        | 0.02   | 0.00   |             |        |        |           |       |      |
| Carbon Dioxide                   |             |        |        |             |        |        |           |       |      |
| Hydrogen Sulfide                 |             |        |        |             |        |        |           |       |      |
| Methane                          | 0.23        | 0.21   | 9.52   | 0.01        | 0.02   | 50.00  |           |       |      |
| Acetylene                        |             |        |        | 1.43        | 1.41   | 1.42   |           |       |      |
| Ethylene                         |             |        |        | 82.78       | 82.84  | 0.07   |           |       |      |
| Ethane                           | 0.19        | 0.18   | 5.56   | 14.71       | 14.69  | 0.14   |           |       |      |
| Propadiene/Methylacetylene       |             |        |        |             |        |        |           |       |      |
| Propylene                        |             |        |        | 0.11        | 0.09   | 22.22  |           |       |      |
| Propane                          |             |        |        |             |        |        |           |       |      |
| Butadiene/C4 Acetylene           |             |        |        |             |        |        |           |       |      |
| Butylenes                        |             |        |        |             |        |        |           |       |      |
| Butanes                          |             |        |        |             |        |        |           |       |      |
| C5 Hydrocarbons                  |             |        |        |             |        |        |           |       |      |
| C6 Non Aromatics                 |             |        |        |             |        |        |           |       |      |
| C7 Non Aromatics                 |             |        |        |             |        |        |           |       |      |
| C8 Non Aromatics                 |             |        |        |             |        |        |           |       |      |
| Benzene                          |             |        |        |             |        |        |           |       |      |
| Toluene                          |             |        |        |             |        |        |           |       |      |
| Xylene/Ethylbenzene              |             |        |        |             |        |        |           |       |      |
| Styrene                          |             |        |        |             |        |        |           |       |      |
| C9                               |             |        |        |             |        |        |           |       |      |
| 204 288 C (PGO)                  |             |        |        |             |        |        |           |       |      |
| 288 C Plus (PFO)                 |             |        |        |             |        |        |           |       |      |
| Steam/Water                      |             |        |        |             |        |        |           |       |      |
| Nitrogen                         | 0.09        | 0.09   | 0.00   |             |        |        |           |       |      |
| Naphtha                          |             |        |        |             |        |        |           |       |      |
| Mass Flow (kg/h)                 | 93          | 92     | 1.09   | 127210      | 127210 | 0      |           |       |      |
| Molar Flow (kmole/h)             | 43.7022     | 43.3   | 0.93   | 4529.032    | 4529.5 | 0.01   |           |       |      |
| Temperature (°C)                 | 35.0025     | 35.2   | 0.56   | -22.2022    | -23.3  | 4.71   |           |       |      |
| Pressure (kg/cm <sup>2</sup> _g) | 30.13       | 19.6   | 53.72  | 21.31       | 20.57  | 3.6    |           |       |      |

**Table A.3.4. Ethylene Unit Stream Properties**

| <b>Component Properties</b> | <b>4226</b> |        |        | <b>4701</b> |        |        | <b>4702</b> |        |        |
|-----------------------------|-------------|--------|--------|-------------|--------|--------|-------------|--------|--------|
|                             | Simulation  | Design | %Error | Simulation  | Design | %Error | Simulation  | Design | %Error |
| Hydrogen                    | 0.00        | 0.02   | 100.00 | 17.97       | 17.97  | 0.00   | 17.97       | 17.97  | 0.00   |
| Carbon Monoxide             |             |        |        | 0.11        | 0.11   | 0.00   | 0.11        | 0.11   | 0.00   |
| Carbon Dioxide              |             |        |        |             |        |        |             |        |        |
| Hydrogen Sulfide            |             |        |        |             |        |        |             |        |        |
| Methane                     | 0.02        | 0.02   | 0.00   | 29.96       | 29.96  | 0.00   | 29.96       | 29.96  | 0.00   |
| Acetylene                   |             |        |        | 0.58        | 0.58   | 0.00   | 0.58        | 0.58   | 0.00   |
| Ethylene                    | 83.86       | 83.70  | 0.19   | 31.42       | 31.42  | 0.00   | 31.42       | 31.42  | 0.00   |
| Ethane                      | 16.50       | 16.18  | 1.98   | 5.49        | 5.49   | 0.00   | 5.49        | 5.49   | 0.00   |
| Propadiene/Methylacetylene  |             |        |        | 0.42        | 0.42   | 0.00   | 0.42        | 0.42   | 0.00   |
| Propylene                   | 0.09        | 0.07   | 28.57  | 10.27       | 10.27  | 0.00   | 10.27       | 10.27  | 0.00   |

# Simulation Report – ECC 860 KTA

## Working Stage 6

|                                  |            |        |        |            |        |        |            |        |        |
|----------------------------------|------------|--------|--------|------------|--------|--------|------------|--------|--------|
| Propane                          |            |        |        | 0.31       | 0.31   | 0.00   | 0.31       | 0.31   | 0.00   |
| Butadiene/C4 Acetylene           |            |        |        | 1.12       | 1.12   | 0.00   | 1.12       | 1.12   | 0.00   |
| Butylenes                        |            |        |        | 1.60       | 1.60   | 0.00   | 1.60       | 1.60   | 0.00   |
| Butanes                          |            |        |        | 0.51       | 0.51   | 0.00   | 0.51       | 0.51   | 0.00   |
| C5 Hydrocarbons                  |            |        |        | 0.18       | 0.18   | 0.00   | 0.18       | 0.18   | 0.00   |
| C6 Non Aromatics                 |            |        |        |            |        |        |            |        |        |
| C7 Non Aromatics                 |            |        |        |            |        |        |            |        |        |
| C8 Non Aromatics                 |            |        |        |            |        |        |            |        |        |
| Benzene                          |            |        |        | 0.02       | 0.02   | 0.00   | 0.02       | 0.02   | 0.00   |
| Toluene                          |            |        |        |            |        |        |            |        |        |
| Xylene/Ethylbenzene              |            |        |        |            |        |        |            |        |        |
| Styrene                          |            |        |        |            |        |        |            |        |        |
| C9                               |            |        |        |            |        |        |            |        |        |
| 204 288 C (PGO)                  |            |        |        |            |        |        |            |        |        |
| 288 C Plus (PFO)                 |            |        |        |            |        |        |            |        |        |
| Steam/Water                      |            |        |        |            |        |        |            |        |        |
| Nitrogen                         |            |        |        | 0.03       | 0.03   | 0.00   | 0.03       | 0.03   | 0.00   |
| Naphtha                          |            |        |        |            |        |        |            |        |        |
| Mass Flow (kg/h)                 | 138816.13  | 138878 | 0.04   | 65371      | 65371  | 0      | 65371      | 65371  | 0      |
| Molar Flow (kmole/h)             | 4889.9502  | 4893   | 0.06   | 2918.521   | 2918.3 | 0.01   | 2918.521   | 2918.3 | 0.01   |
| Temperature (°C)                 | -28.72     | -28.7  | 0.07   | -5.7       | -5.7   | 0      | -18.9      | -18.9  | 0      |
| Pressure (kg/cm <sup>2</sup> _g) | 17.24      | 17.24  | 0      | 36.12      | 36.12  | 0      | 35.84      | 35.84  | 0      |
| Component Properties             | 4315       |        |        | 4309       |        |        | 4061       |        |        |
|                                  | Simulation | Design | %Error | Simulation | Design | %Error | Simulation | Design | %Error |
| Hydrogen                         |            |        |        |            |        |        |            |        |        |
| Carbon Monoxide                  |            |        |        |            |        |        |            |        |        |
| Carbon Dioxide                   |            |        |        |            |        |        |            |        |        |
| Hydrogen Sulfide                 |            |        |        |            |        |        |            |        |        |
| Methane                          |            |        |        |            |        |        |            |        |        |
| Acetylene                        |            |        |        |            |        |        |            |        |        |
| Ethylene                         | 73.94      | 77.09  | 4.09   | 0.01       | 0.50   | 98.00  | 0.01       | 0.50   | 98.00  |
| Ethane                           | 25.46      | 22.87  | 11.32  | 98.96      | 98.98  | 0.02   | 98.96      | 98.98  | 0.02   |
| Propadiene/Methylacetylene       |            |        |        |            |        |        |            |        |        |
| Propylene                        | 0.05       | 0.04   | 25.00  | 0.62       | 0.50   | 24.00  | 0.62       | 0.50   | 24.00  |
| Propane                          |            |        |        |            |        |        |            |        |        |
| Butadiene/C4 Acetylene           |            |        |        |            |        |        |            |        |        |
| Butylenes                        |            |        |        |            |        |        |            |        |        |
| Butanes                          |            |        |        |            |        |        |            |        |        |
| C5 Hydrocarbons                  |            |        |        |            |        |        |            |        |        |
| C6 Non Aromatics                 |            |        |        |            |        |        |            |        |        |
| C7 Non Aromatics                 |            |        |        |            |        |        |            |        |        |
| C8 Non Aromatics                 |            |        |        |            |        |        |            |        |        |
| Benzene                          |            |        |        |            |        |        |            |        |        |
| Toluene                          |            |        |        |            |        |        |            |        |        |
| Xylene/Ethylbenzene              |            |        |        |            |        |        |            |        |        |
| Styrene                          |            |        |        |            |        |        |            |        |        |
| C9                               |            |        |        |            |        |        |            |        |        |
| 204 288 C (PGO)                  |            |        |        |            |        |        |            |        |        |
| 288 C Plus (PFO)                 |            |        |        |            |        |        |            |        |        |
| Steam/Water                      |            |        |        |            |        |        |            |        |        |
| Nitrogen                         |            |        |        | 0.00       | 0.01   | 100.00 | 0.00       | 0.01   | 100.00 |
| Vapour Fraction                  | 0.0018     |        |        | 0          |        |        | 0          |        |        |
| Mass Flow (kg/h)                 | 18202      | 18202  | 0      | 3725       | 3725   | 0      | 3006.7761  | 3001   | 0.19   |
| Molar Flow (kmole/h)             | 637.2421   | 638.2  | 0.15   | 123.6422   | 123.7  | 0.05   | 99.8025    | 99.6   | 0.2    |
| Temperature (°C)                 | -29.199    | -29.7  | 1.69   | -9.4411    | -9.5   | 0.62   | -11.4725   | -11.4  | 0.64   |
| Pressure (kg/cm <sup>2</sup> _g) | 17.129     | 17.13  | 0.01   | 31.48      | 31.48  | 0      | 17.39      | 17.39  | 0      |
| Component Properties             | 4301       |        |        | 4302       |        |        | 4303       |        |        |
|                                  | Simulation | Design | %Error | Simulation | Design | %Error | Simulation | Design | %Error |

# Simulation Report – ECC 860 KTA

## Working Stage 6

|                                  |            |         |        |            |         |        |            |         |        |
|----------------------------------|------------|---------|--------|------------|---------|--------|------------|---------|--------|
| Hydrogen                         | 0.03       | 0.03    | 0.00   | 0.03       | 0.03    | 0.00   | 0.03       | 0.03    | 0.00   |
| Carbon Monoxide                  |            |         |        |            |         |        |            |         |        |
| Carbon Dioxide                   |            |         |        |            |         |        |            |         |        |
| Hydrogen Sulfide                 |            |         |        |            |         |        |            |         |        |
| Methane                          | 0.17       | 0.17    | 0.00   | 0.17       | 0.17    | 0.00   | 0.17       | 0.17    | 0.00   |
| Acetylene                        |            |         |        |            |         |        |            |         |        |
| Ethylene                         | 99.75      | 99.77   | 0.02   | 99.75      | 99.77   | 0.02   | 99.75      | 99.78   | 0.03   |
| Ethane                           | 0.01       | 0.02    | 50.00  | 0.01       | 0.02    | 50.00  | 0.01       | 0.02    | 50.00  |
| Propadiene/Methylacetylene       |            |         |        |            |         |        |            |         |        |
| Propylene                        |            |         |        |            |         |        |            |         |        |
| Propane                          |            |         |        |            |         |        |            |         |        |
| Butadiene/C4 Acetylene           |            |         |        |            |         |        |            |         |        |
| Butylenes                        |            |         |        |            |         |        |            |         |        |
| Butanes                          |            |         |        |            |         |        |            |         |        |
| C5 Hydrocarbons                  |            |         |        |            |         |        |            |         |        |
| C6 Non Aromatics                 |            |         |        |            |         |        |            |         |        |
| C7 Non Aromatics                 |            |         |        |            |         |        |            |         |        |
| C8 Non Aromatics                 |            |         |        |            |         |        |            |         |        |
| Benzene                          |            |         |        |            |         |        |            |         |        |
| Toluene                          |            |         |        |            |         |        |            |         |        |
| Xylene/Ethylbenzene              |            |         |        |            |         |        |            |         |        |
| Styrene                          |            |         |        |            |         |        |            |         |        |
| C9                               |            |         |        |            |         |        |            |         |        |
| 204 288 C (PGO)                  |            |         |        |            |         |        |            |         |        |
| 288 C Plus (PFO)                 |            |         |        |            |         |        |            |         |        |
| Steam/Water                      |            |         |        |            |         |        |            |         |        |
| Nitrogen                         |            |         |        |            |         |        |            |         |        |
| Naphtha                          |            |         |        |            |         |        |            |         |        |
| Mass Flow (kg/h)                 | 425980.99  | 425981  | 0      | 288816.2   | 288813  | 0      | 425687.26  | 423888  | 0.42   |
| Molar Flow (kmole/h)             | 15200.442  | 15199.9 | 0      | 10305.939  | 10305.5 | 0      | 15189.799  | 15124.2 | 0.43   |
| Temperature (°C)                 | -34.7161   | -34.5   | 0.63   | -35.8723   | -35.9   | 0.08   | -35.8811   | -36.5   | 1.7    |
| Pressure (kg/cm <sup>2</sup> _g) | 16.48      | 16.48   | 0      | 16.33      | 16.33   | 0      | 16.33      | 15.88   | 2.83   |
| Component Properties             | 4324       |         |        | 4318       |         |        | 4319       |         |        |
|                                  | Simulation | Design  | %Error | Simulation | Design  | %Error | Simulation | Design  | %Error |
| Hydrogen                         |            |         |        | 1.39       | 1.18    | 17.80  | 1.17       | 1.18    | 0.6    |
| Carbon Monoxide                  |            |         |        | 0.00       | 0.02    | 100.00 | 0.01       | 0.02    | 31.0   |
| Carbon Dioxide                   |            |         |        |            |         |        |            |         |        |
| Hydrogen Sulfide                 |            |         |        |            |         |        |            |         |        |
| Methane                          | 0.00       | 0.01    | 100.00 | 0.75       | 0.84    | 10.71  | 0.84       | 0.84    | 0.0    |
| Acetylene                        |            |         |        |            |         |        |            |         |        |
| Ethylene                         | 99.70      | 99.95   | 0.25   | 97.82      | 97.95   | 0.13   | 97.96      | 97.95   | 0.0    |
| Ethane                           | 0.01       | 0.04    | 75.00  | 0.00       | 0.02    | 100.00 | 0.01       | 0.02    | 32.0   |
| Propadiene/Methylacetylene       |            |         |        |            |         |        |            |         |        |
| Propylene                        |            |         |        |            |         |        |            |         |        |
| Propane                          |            |         |        |            |         |        |            |         |        |
| Butadiene/C4 Acetylene           |            |         |        |            |         |        |            |         |        |
| Butylenes                        |            |         |        |            |         |        |            |         |        |
| Butanes                          |            |         |        |            |         |        |            |         |        |
| C5 Hydrocarbons                  |            |         |        |            |         |        |            |         |        |
| C6 Non Aromatics                 |            |         |        |            |         |        |            |         |        |
| C7 Non Aromatics                 |            |         |        |            |         |        |            |         |        |
| C8 Non Aromatics                 |            |         |        |            |         |        |            |         |        |
| Benzene                          |            |         |        |            |         |        |            |         |        |
| Toluene                          |            |         |        |            |         |        |            |         |        |
| Xylene/Ethylbenzene              |            |         |        |            |         |        |            |         |        |
| Styrene                          |            |         |        |            |         |        |            |         |        |
| C9                               |            |         |        |            |         |        |            |         |        |
| 204 288 C (PGO)                  |            |         |        |            |         |        |            |         |        |



# Simulation Report – ECC 860 KTA

## Working Stage 6

|                                  |            |        |        |            |        |        |            |        |        |
|----------------------------------|------------|--------|--------|------------|--------|--------|------------|--------|--------|
| 288 C Plus (PFO)                 |            |        |        |            |        |        |            |        |        |
| Steam/Water                      |            |        |        |            |        |        |            |        |        |
| Nitrogen                         |            |        |        |            |        |        |            |        |        |
| Naphtha                          | 0          |        |        | 0.9907     |        |        | 0.990739   |        |        |
| Mass Flow (kg/h)                 | 53972.91   | 53973  | 0      | 296.9425   | 2093   | 85.81  | 2092.8778  | 2093   | 0.0    |
| Molar Flow (kmole/h)             | 1924.2858  | 1923.9 | 0.02   | 10.7583    | 75.7   | 85.79  | 75.696598  | 75.7   | 0.0    |
| Temperature (°C)                 | -32.0912   | -34.5  | 6.98   | -35.8811   | -36.5  | 1.7    | -57.8      | -57.8  | 0.0    |
| Pressure (kg/cm <sup>2</sup> _g) | 38.5       | 38.5   | 0      | 16.33      | 15.88  | 2.83   | 5.97       | 5.97   | 0.0    |
| Component Properties             | 4306       |        |        | 4308       |        |        | 4312       |        |        |
|                                  | Simulation | Design | %Error | Simulation | Design | %Error | Simulation | Design | %Error |
| Hydrogen                         |            |        |        |            |        |        |            |        |        |
| Carbon Monoxide                  |            |        |        |            |        |        |            |        |        |
| Carbon Dioxide                   |            |        |        |            |        |        |            |        |        |
| Hydrogen Sulfide                 |            |        |        |            |        |        |            |        |        |
| Methane                          |            |        |        |            |        |        |            |        |        |
| Acetylene                        |            |        |        |            |        |        |            |        |        |
| Ethylene                         | 0.01       | 0.50   | 98.00  | 0.01       | 0.50   | 98.00  | 73.94      | 77.09  | 4.09   |
| Ethane                           | 98.96      | 98.98  | 0.02   | 98.96      | 98.98  | 0.02   | 25.46      | 22.87  | 11.32  |
| Propadiene/Methylacetylene       |            |        |        |            |        |        |            |        |        |
| Propylene                        | 0.62       | 0.50   | 24.00  | 0.62       | 0.50   | 24.00  | 0.05       | 0.04   | 25.00  |
| Propane                          |            |        |        |            |        |        |            |        |        |
| Butadiene/C4 Acetylene           |            |        |        |            |        |        |            |        |        |
| Butylenes                        |            |        |        |            |        |        |            |        |        |
| Butanes                          |            |        |        |            |        |        |            |        |        |
| C5 Hydrocarbons                  |            |        |        |            |        |        |            |        |        |
| C6 Non Aromatics                 |            |        |        |            |        |        |            |        |        |
| C7 Non Aromatics                 |            |        |        |            |        |        |            |        |        |
| C8 Non Aromatics                 |            |        |        |            |        |        |            |        |        |
| Benzene                          |            |        |        |            |        |        |            |        |        |
| Toluene                          |            |        |        |            |        |        |            |        |        |
| Xylene/Ethylbenzene              |            |        |        |            |        |        |            |        |        |
| Styrene                          |            |        |        |            |        |        |            |        |        |
| C9                               |            |        |        |            |        |        |            |        |        |
| 204 288 C (PGO)                  |            |        |        |            |        |        |            |        |        |
| 288 C Plus (PFO)                 |            |        |        |            |        |        |            |        |        |
| Steam/Water                      |            |        |        |            |        |        |            |        |        |
| Nitrogen                         | 0.00       | 0.01   | 100.00 | 0.00       | 0.01   | 100.00 |            |        |        |
| Vapour Fraction                  |            |        |        |            |        |        |            |        |        |
| Mass Flow (kg/h)                 | 19615.776  | 19610  | 0.03   | 3725       | 3725   | 0      | 120316.21  | 120133 | 0.15   |
| Molar Flow (kmole/h)             | 651.0975   | 651.1  | 0      | 123.6422   | 123.7  | 0.05   | 4212.2051  | 4212.2 | 0      |
| Temperature (°C)                 | -11.4725   | -11.4  | 0.64   | -11.4725   | -11.4  | 0.64   | -29.199    | -29.7  | 1.69   |
| Pressure (kg/cm <sup>2</sup> _g) | 17.39      | 17.39  | 0      | 17.39      | 17.39  | 0      | 17.129     | 17.13  | 0.01   |
| Component Properties             | 4325       |        |        | 4326       |        |        | 4314       |        |        |
|                                  | Simulation | Design | %Error | Simulation | Design | %Error | Simulation | Design | %Error |
| Hydrogen                         |            |        |        |            |        |        |            |        |        |
| Carbon Monoxide                  |            |        |        |            |        |        |            |        |        |
| Carbon Dioxide                   |            |        |        |            |        |        |            |        |        |
| Hydrogen Sulfide                 |            |        |        |            |        |        |            |        |        |
| Methane                          | 0.00       | 0.01   | 100.00 | 0.00       | 0.01   | 100.00 |            |        |        |
| Acetylene                        |            |        |        |            |        |        |            |        |        |
| Ethylene                         | 99.98      | 99.95  | 0.03   | 99.95      | 99.95  | 0.00   | 73.94      | 77.09  | 4.09   |
| Ethane                           | 0.01       | 0.04   | 75.00  | 0.01       | 0.04   | 75.00  | 25.46      | 22.87  | 11.32  |
| Propadiene/Methylacetylene       |            |        |        |            |        |        |            |        |        |
| Propylene                        |            |        |        |            |        |        | 0.05       | 0.04   | 25.00  |
| Propane                          |            |        |        |            |        |        |            |        |        |
| Butadiene/C4 Acetylene           |            |        |        |            |        |        |            |        |        |
| Butylenes                        |            |        |        |            |        |        |            |        |        |
| Butanes                          |            |        |        |            |        |        |            |        |        |

# Simulation Report – ECC 860 KTA

## Working Stage 6

|                                  |            |        |        |            |        |        |            |        |        |
|----------------------------------|------------|--------|--------|------------|--------|--------|------------|--------|--------|
| C5 Hydrocarbons                  |            |        |        |            |        |        |            |        |        |
| C6 Non Aromatics                 |            |        |        |            |        |        |            |        |        |
| C7 Non Aromatics                 |            |        |        |            |        |        |            |        |        |
| C8 Non Aromatics                 |            |        |        |            |        |        |            |        |        |
| Benzene                          |            |        |        |            |        |        |            |        |        |
| Toluene                          |            |        |        |            |        |        |            |        |        |
| Xylene/Ethylbenzene              |            |        |        |            |        |        |            |        |        |
| Styrene                          |            |        |        |            |        |        |            |        |        |
| C9                               |            |        |        |            |        |        |            |        |        |
| 204 288 C (PGO)                  |            |        |        |            |        |        |            |        |        |
| 288 C Plus (PFO)                 |            |        |        |            |        |        |            |        |        |
| Steam/Water                      |            |        |        |            |        |        |            |        |        |
| Nitrogen                         |            |        |        |            |        |        |            |        |        |
| Naphtha                          |            |        |        |            |        |        |            |        |        |
| Mass Flow (kg/h)                 | 25000      | 25000  | 0      | 25000      | 25000  | 0      | 82494.831  | 82313  | 0.22   |
| Molar Flow (kmole/h)             | 891.3202   | 891.2  | 0.01   | 891.3202   | 891.2  | 0.01   | 2888.1052  | 2886.1 | 0.07   |
| Temperature (°C)                 | -34.5537   | -34.3  | 0.74   | -95.7107   | -99    | 3.32   | -27.9      | -27.9  | 0      |
| Pressure (kg/cm <sup>2</sup> _g) | 16.5201    | 19.22  | 14.05  | 16.3801    | 19.08  | 14.15  | 17.32      | 17.32  | 0      |
| Component Properties             | 4307       |        |        | 4323       |        |        | 4313       |        |        |
|                                  | Simulation | Design | %Error | Simulation | Design | %Error | Simulation | Design | %Error |
| Hydrogen                         |            |        |        |            |        |        |            |        |        |
| Carbon Monoxide                  |            |        |        |            |        |        |            |        |        |
| Carbon Dioxide                   |            |        |        |            |        |        |            |        |        |
| Hydrogen Sulfide                 |            |        |        |            |        |        |            |        |        |
| Methane                          |            |        |        | 0.00       | 0.01   | 100.00 |            |        |        |
| Acetylene                        |            |        |        |            |        |        |            |        |        |
| Ethylene                         | 0.01       | 0.50   | 98.00  | 99.70      | 99.95  | 0.25   | 73.94      | 77.09  | 4.09   |
| Ethane                           | 98.96      | 98.98  | 0.02   | 0.01       | 0.04   | 75.00  | 25.46      | 22.87  | 11.32  |
| Propadiene/Methylacetylene       |            |        |        |            |        |        |            |        |        |
| Propylene                        | 0.62       | 0.50   | 24.00  |            |        |        | 0.05       | 0.04   | 25.00  |
| Propane                          |            |        |        |            |        |        |            |        |        |
| Butadiene/C4 Acetylene           |            |        |        |            |        |        |            |        |        |
| Butylenes                        |            |        |        |            |        |        |            |        |        |
| Butanes                          |            |        |        |            |        |        |            |        |        |
| C5 Hydrocarbons                  |            |        |        |            |        |        |            |        |        |
| C6 Non Aromatics                 |            |        |        |            |        |        |            |        |        |
| C7 Non Aromatics                 |            |        |        |            |        |        |            |        |        |
| C8 Non Aromatics                 |            |        |        |            |        |        |            |        |        |
| Benzene                          |            |        |        |            |        |        |            |        |        |
| Toluene                          |            |        |        |            |        |        |            |        |        |
| Xylene/Ethylbenzene              |            |        |        |            |        |        |            |        |        |
| Styrene                          |            |        |        |            |        |        |            |        |        |
| C9                               |            |        |        |            |        |        |            |        |        |
| 204 288 C (PGO)                  |            |        |        |            |        |        |            |        |        |
| 288 C Plus (PFO)                 |            |        |        |            |        |        |            |        |        |
| Steam/Water                      |            |        |        |            |        |        |            |        |        |
| Nitrogen                         | 0.00       | 0.01   | 100.00 |            |        |        |            |        |        |
| Naphtha                          | 0          |        |        | 0          |        |        |            |        |        |
| Mass Flow (kg/h)                 | 12884      | 12884  | 0      | 45000      | 45000  | 0      | 102114.21  | 101931 | 0.18   |
| Molar Flow (kmole/h)             | 427.6527   | 427.8  | 0.03   | 1604.3763  | 1604.1 | 0.02   | 3574.963   | 3574   | 0.03   |
| Temperature (°C)                 | -11.4725   | -11.4  | 0.64   | -99        | -99    | 0      | -29.199    | -29.7  | 1.69   |
| Pressure (kg/cm <sup>2</sup> _g) | 17.39      | 17.39  | 0      | 3          | 3      | 0      | 17.129     | 17.13  | 0.01   |
| Component Properties             | 4304       |        |        | 4305       |        |        | 4316       |        |        |
|                                  | Simulation | Design | %Error | Simulation | Design | %Error | Simulation | Design | %Error |
| Hydrogen                         | 0.03       | 0.03   | 0.00   |            |        |        |            |        |        |
| Carbon Monoxide                  |            |        |        |            |        |        |            |        |        |
| Carbon Dioxide                   |            |        |        |            |        |        |            |        |        |
| Hydrogen Sulfide                 |            |        |        |            |        |        |            |        |        |

# Simulation Report – ECC 860 KTA

## Working Stage 6

|                                  |            |         |        |            |        |        |            |        |        |
|----------------------------------|------------|---------|--------|------------|--------|--------|------------|--------|--------|
| Methane                          | 0.17       | 0.17    | 0.00   | 0.00       | 0.01   | 100.00 |            |        |        |
| Acetylene                        |            |         |        |            |        |        |            |        |        |
| Ethylene                         | 99.75      | 99.78   | 0.03   | 99.70      | 99.95  | 0.25   | 48.35      | 64.07  | 24.54  |
| Ethane                           | 0.01       | 0.02    | 50.00  | 0.01       | 0.04   | 75.00  | 50.76      | 35.86  | 41.55  |
| Propadiene/Methylacetylene       |            |         |        |            |        |        |            |        |        |
| Propylene                        |            |         |        |            |        |        | 0.09       | 0.06   | 50.00  |
| Propane                          |            |         |        |            |        |        |            |        |        |
| Butadiene/C4 Acetylene           |            |         |        |            |        |        |            |        |        |
| Butylenes                        |            |         |        |            |        |        |            |        |        |
| Butanes                          |            |         |        |            |        |        |            |        |        |
| C5 Hydrocarbons                  |            |         |        |            |        |        |            |        |        |
| C6 Non Aromatics                 |            |         |        |            |        |        |            |        |        |
| C7 Non Aromatics                 |            |         |        |            |        |        |            |        |        |
| C8 Non Aromatics                 |            |         |        |            |        |        |            |        |        |
| Benzene                          |            |         |        |            |        |        |            |        |        |
| Toluene                          |            |         |        |            |        |        |            |        |        |
| Xylene/Ethylbenzene              |            |         |        |            |        |        |            |        |        |
| Styrene                          |            |         |        |            |        |        |            |        |        |
| C9                               |            |         |        |            |        |        |            |        |        |
| 204 288 C (PGO)                  |            |         |        |            |        |        |            |        |        |
| 288 C Plus (PFO)                 |            |         |        |            |        |        |            |        |        |
| Steam/Water                      |            |         |        |            |        |        |            |        |        |
| Nitrogen                         |            |         |        |            |        |        |            |        |        |
| Vapour Fraction                  |            |         |        |            |        |        |            |        |        |
| Mass Flow (kg/h)                 | 425687.26  | 423888  | 0.42   | 98762.272  | 98973  | 0.21   | 55148.337  | 54603  | 1      |
| Molar Flow (kmole/h)             | 15189.799  | 15124.2 | 0.43   | 3521.1522  | 3528   | 0.19   | 1896.8985  | 1896.9 | 0      |
| Temperature (°C)                 | -35.1843   | -36.5   | 3.6    | -34.5537   | -34.3  | 0.74   | -24.1902   | -27.3  | 11.39  |
| Pressure (kg/cm <sup>2</sup> _g) | 22.55      | 22.53   | 0.09   | 16.5201    | 16.52  | 0      | 17.2026    | 17.2   | 0.02   |
| Component Properties             | 4366       |         |        | 4367       |        |        | 4320       |        |        |
|                                  | Simulation | Design  | %Error | Simulation | Design | %Error | Simulation | Design | %Error |
| Hydrogen                         |            |         |        |            |        |        |            |        |        |
| Carbon Monoxide                  |            |         |        |            |        |        |            |        |        |
| Carbon Dioxide                   |            |         |        |            |        |        |            |        |        |
| Hydrogen Sulfide                 |            |         |        |            |        |        |            |        |        |
| Methane                          |            |         |        |            |        |        | 0.00       | 0.01   | 100.00 |
| Acetylene                        |            |         |        |            |        |        |            |        |        |
| Ethylene                         | 48.35      | 64.07   | 24.54  | 48.35      | 64.07  | 24.54  | 99.70      | 99.95  | 0.25   |
| Ethane                           | 50.76      | 35.86   | 41.55  | 50.76      | 35.86  | 41.55  | 0.01       | 0.04   | 75.00  |
| Propadiene/Methylacetylene       |            |         |        |            |        |        |            |        |        |
| Propylene                        | 0.09       | 0.06    | 50.00  | 0.09       | 0.06   | 50.00  |            |        |        |
| Propane                          |            |         |        |            |        |        |            |        |        |
| Butadiene/C4 Acetylene           |            |         |        |            |        |        |            |        |        |
| Butylenes                        |            |         |        |            |        |        |            |        |        |
| Butanes                          |            |         |        |            |        |        |            |        |        |
| C5 Hydrocarbons                  |            |         |        |            |        |        |            |        |        |
| C6 Non Aromatics                 |            |         |        |            |        |        |            |        |        |
| C7 Non Aromatics                 |            |         |        |            |        |        |            |        |        |
| C8 Non Aromatics                 |            |         |        |            |        |        |            |        |        |
| Benzene                          |            |         |        |            |        |        |            |        |        |
| Toluene                          |            |         |        |            |        |        |            |        |        |
| Xylene/Ethylbenzene              |            |         |        |            |        |        |            |        |        |
| Styrene                          |            |         |        |            |        |        |            |        |        |
| C9                               |            |         |        |            |        |        |            |        |        |
| 204 288 C (PGO)                  |            |         |        |            |        |        |            |        |        |
| 288 C Plus (PFO)                 |            |         |        |            |        |        |            |        |        |
| Steam/Water                      |            |         |        |            |        |        |            |        |        |
| Nitrogen                         |            |         |        |            |        |        |            |        |        |
| Naphtha                          |            |         |        |            |        |        |            |        |        |

# Simulation Report – ECC 860 KTA

## Working Stage 6

|                                  |            |        |        |            |        |        |            |        |        |
|----------------------------------|------------|--------|--------|------------|--------|--------|------------|--------|--------|
| Mass Flow (kg/h)                 | 14810      | 14810  | 0      | 14810      | 14810  | 0      | 20000      | 20000  | 0      |
| Molar Flow (kmole/h)             | 509.4091   | 514.5  | 0.99   | 509.4091   | 514.5  | 0.99   | 713.0561   | 712.9  | 0.02   |
| Temperature (°C)                 | -24.1902   | -27.3  | 11.39  | -20.3689   | -24.9  | 18.2   | -34.5537   | -34.3  | 0.74   |
| Pressure (kg/cm <sup>2</sup> _g) | 17.2026    | 17.2   | 0.02   | 17.37      | 17.37  | 0      | 16.5201    | 19.22  | 14.05  |
| Component Properties             | 4317       |        |        | 4363       |        |        | 4364       |        |        |
|                                  | Simulation | Design | %Error | Simulation | Design | %Error | Simulation | Design | %Error |
| Hydrogen                         |            |        |        |            |        |        |            |        |        |
| Carbon Monoxide                  |            |        |        |            |        |        |            |        |        |
| Carbon Dioxide                   |            |        |        |            |        |        |            |        |        |
| Hydrogen Sulfide                 |            |        |        |            |        |        |            |        |        |
| Methane                          |            |        |        |            |        |        |            |        |        |
| Acetylene                        |            |        |        |            |        |        |            |        |        |
| Ethylene                         | 48.35      | 64.07  | 24.54  | 73.94      | 77.09  | 4.09   | 73.94      | 77.09  | 4.09   |
| Ethane                           | 50.76      | 35.86  | 41.55  | 25.46      | 22.87  | 11.32  | 25.46      | 22.87  | 11.32  |
| Propadiene/Methylacetylene       |            |        |        |            |        |        |            |        |        |
| Propylene                        | 0.09       | 0.06   | 50.00  | 0.05       | 0.04   | 25.00  | 0.05       | 0.04   | 25.00  |
| Propane                          |            |        |        |            |        |        |            |        |        |
| Butadiene/C4 Acetylene           |            |        |        |            |        |        |            |        |        |
| Butylenes                        |            |        |        |            |        |        |            |        |        |
| Butanes                          |            |        |        |            |        |        |            |        |        |
| C5 Hydrocarbons                  |            |        |        |            |        |        |            |        |        |
| C6 Non Aromatics                 |            |        |        |            |        |        |            |        |        |
| C7 Non Aromatics                 |            |        |        |            |        |        |            |        |        |
| C8 Non Aromatics                 |            |        |        |            |        |        |            |        |        |
| Benzene                          |            |        |        |            |        |        |            |        |        |
| Toluene                          |            |        |        |            |        |        |            |        |        |
| Xylene/Ethylbenzene              |            |        |        |            |        |        |            |        |        |
| Styrene                          |            |        |        |            |        |        |            |        |        |
| C9                               |            |        |        |            |        |        |            |        |        |
| 204 288 C (PGO)                  |            |        |        |            |        |        |            |        |        |
| 288 C Plus (PFO)                 |            |        |        |            |        |        |            |        |        |
| Steam/Water                      |            |        |        |            |        |        |            |        |        |
| Nitrogen                         |            |        |        |            |        |        |            |        |        |
| Naphtha                          |            |        |        |            |        |        |            |        |        |
| Mass Flow (kg/h)                 | 40338.337  | 39793  | 1.37   | 19619      | 19619  | 0      | 19619      | 19619  | 0      |
| Molar Flow (kmole/h)             | 1387.4893  | 1382.4 | 0.37   | 686.8505   | 687.9  | 0.15   | 686.8525   | 687.9  | 0.15   |
| Temperature (°C)                 | -24.9      | -24.9  | 0      | -29.199    | -29.7  | 1.69   | -27.9      | -27.9  | 0      |
| Pressure (kg/cm <sup>2</sup> _g) | 17.37      | 17.37  | 0      | 17.129     | 17.13  | 0.01   | 17.32      | 17.32  | 0      |
| Component Properties             | 4321       |        |        | 4322       |        |        | 4351       |        |        |
|                                  | Simulation | Design | %Error | Simulation | Design | %Error | Simulation | Design | %Error |
| Hydrogen                         |            |        |        |            |        |        | 0.03       | 0.03   | 0.00   |
| Carbon Monoxide                  |            |        |        |            |        |        |            |        |        |
| Carbon Dioxide                   |            |        |        |            |        |        |            |        |        |
| Hydrogen Sulfide                 |            |        |        |            |        |        |            |        |        |
| Methane                          | 0.00       | 0.01   | 100.00 | 0.00       | 0.01   | 100.00 | 0.17       | 0.17   | 0.00   |
| Acetylene                        |            |        |        |            |        |        |            |        |        |
| Ethylene                         | 99.70      | 99.95  | 0.25   | 99.70      | 99.95  | 0.25   | 99.75      | 99.77  | 0.02   |
| Ethane                           | 0.01       | 0.04   | 75.00  | 0.01       | 0.04   | 75.00  | 0.01       | 0.02   | 50.00  |
| Propadiene/Methylacetylene       |            |        |        |            |        |        |            |        |        |
| Propylene                        |            |        |        |            |        |        |            |        |        |
| Propane                          |            |        |        |            |        |        |            |        |        |
| Butadiene/C4 Acetylene           |            |        |        |            |        |        |            |        |        |
| Butylenes                        |            |        |        |            |        |        |            |        |        |
| Butanes                          |            |        |        |            |        |        |            |        |        |
| C5 Hydrocarbons                  |            |        |        |            |        |        |            |        |        |
| C6 Non Aromatics                 |            |        |        |            |        |        |            |        |        |
| C7 Non Aromatics                 |            |        |        |            |        |        |            |        |        |
| C8 Non Aromatics                 |            |        |        |            |        |        |            |        |        |

# Simulation Report – ECC 860 KTA

## Working Stage 6

|                                  |            |        |        |          |       |      |           |        |      |
|----------------------------------|------------|--------|--------|----------|-------|------|-----------|--------|------|
| Benzene                          |            |        |        |          |       |      |           |        |      |
| Toluene                          |            |        |        |          |       |      |           |        |      |
| Xylene/Ethylbenzene              |            |        |        |          |       |      |           |        |      |
| Styrene                          |            |        |        |          |       |      |           |        |      |
| C9                               |            |        |        |          |       |      |           |        |      |
| 204 288 C (PGO)                  |            |        |        |          |       |      |           |        |      |
| 288 C Plus (PFO)                 |            |        |        |          |       |      |           |        |      |
| Steam/Water                      |            |        |        |          |       |      |           |        |      |
| Nitrogen                         |            |        |        |          |       |      |           |        |      |
| Vapour Fraction                  |            |        |        |          |       |      |           |        |      |
| Mass Flow (kg/h)                 | 53762.272  | 53973  | 0.39   | 20000    | 20000 | 0    | 137168    | 137168 | 0    |
| Molar Flow (kmole/h)             | 1916.7759  | 1923.9 | 0.37   | 713.0561 | 712.9 | 0.02 | 4894.6182 | 4894.4 | 0    |
| Temperature (°C)                 | -34.5537   | -34.3  | 0.74   | -103.784 | -99   | 4.83 | -34.7161  | -34.5  | 0.63 |
| Pressure (kg/cm <sup>2</sup> _g) | 16.5201    | 19.22  | 14.05  | 3        | 19.23 | 84.4 | 16.48     | 16.48  | 0    |
| Component Properties             | 4352       |        |        |          |       |      |           |        |      |
|                                  | Simulation | Design | %Error |          |       |      |           |        |      |
| Hydrogen                         | 0.03       | 0.03   | 0.00   |          |       |      |           |        |      |
| Carbon Monoxide                  |            |        |        |          |       |      |           |        |      |
| Carbon Dioxide                   |            |        |        |          |       |      |           |        |      |
| Hydrogen Sulfide                 |            |        |        |          |       |      |           |        |      |
| Methane                          | 0.17       | 0.17   | 0.00   |          |       |      |           |        |      |
| Acetylene                        |            |        |        |          |       |      |           |        |      |
| Ethylene                         | 99.75      | 99.77  | 0.02   |          |       |      |           |        |      |
| Ethane                           | 0.01       | 0.02   | 50.00  |          |       |      |           |        |      |
| Propadiene/Methylacetylene       |            |        |        |          |       |      |           |        |      |
| Propylene                        |            |        |        |          |       |      |           |        |      |
| Propane                          |            |        |        |          |       |      |           |        |      |
| Butadiene/C4 Acetylene           |            |        |        |          |       |      |           |        |      |
| Butylenes                        |            |        |        |          |       |      |           |        |      |
| Butanes                          |            |        |        |          |       |      |           |        |      |
| C5 Hydrocarbons                  |            |        |        |          |       |      |           |        |      |
| C6 Non Aromatics                 |            |        |        |          |       |      |           |        |      |
| C7 Non Aromatics                 |            |        |        |          |       |      |           |        |      |
| C8 Non Aromatics                 |            |        |        |          |       |      |           |        |      |
| Benzene                          |            |        |        |          |       |      |           |        |      |
| Toluene                          |            |        |        |          |       |      |           |        |      |
| Xylene/Ethylbenzene              |            |        |        |          |       |      |           |        |      |
| Styrene                          |            |        |        |          |       |      |           |        |      |
| C9                               |            |        |        |          |       |      |           |        |      |
| 204 288 C (PGO)                  |            |        |        |          |       |      |           |        |      |
| 288 C Plus (PFO)                 |            |        |        |          |       |      |           |        |      |
| Steam/Water                      |            |        |        |          |       |      |           |        |      |
| Nitrogen                         |            |        |        |          |       |      |           |        |      |
| Naphtha                          |            |        |        |          |       |      |           |        |      |
| Mass Flow (kg/h)                 | 137168     | 137168 | 0      |          |       |      |           |        |      |
| Molar Flow (kmole/h)             | 4894.6182  | 4894.4 | 0      |          |       |      |           |        |      |
| Temperature (°C)                 | -35.9      | -35.9  | 0      |          |       |      |           |        |      |
| Pressure (kg/cm <sup>2</sup> _g) | 16.33      | 16.33  | 0      |          |       |      |           |        |      |

### A.4. Stage 4

Table A.4.1. C3 Hydrogenation Stream Compositions

| Variable         | Integration | 4408             |        | Design | Error  | %Error |
|------------------|-------------|------------------|--------|--------|--------|--------|
| Component (%mol) |             | Component (%mol) |        |        |        |        |
| Hydrogen         | 0.0002      | Hydrogen         | 0.0002 | 0.0002 | 0.0000 | 0.00   |

# Simulation Report – ECC 860 KTA

## Working Stage 6

|                                     |                    |                                     |           |               |              |               |
|-------------------------------------|--------------------|-------------------------------------|-----------|---------------|--------------|---------------|
| Methane                             | 0.0003             | Methane                             | 0.0003    | 0.0003        | 0.0000       | 0.00          |
| Ethane                              | 0.0000             | Ethane                              | 0.0000    | 0.0000        | 0.0000       |               |
| M-acetylene                         | 0.0207             | Propadiene/Methylacetylene          | 0.0207    | 0.0207        | 0.0000       | 0.00          |
| Propene                             | 0.9370             | Propylene                           | 0.9370    | 0.9370        | 0.0000       | 0.00          |
| Propane                             | 0.0395             | Propane                             | 0.0395    | 0.0395        | 0.0000       | 0.00          |
| 13-Butadiene                        | 0.0007             | Butadienes/C4Acetylenes             | 0.0007    | 0.0007        | 0.0000       | 0.00          |
| 1-Butene                            | 0.0015             | Butylenes                           | 0.0015    | 0.0015        | 0.0000       | 0.00          |
| n-Butane                            | 0.0000             | Butanes                             | 0.0000    | 0.0000        | 0.0000       |               |
| i-Pentane                           | 0.0000             | C5-Hydrocarbons                     | 0.0000    | 0.0000        | 0.0000       |               |
| 1-Hexyne                            | 0.0000             | C6 Non-Aromatics                    | 0.0000    | 0.0000        | 0.0000       |               |
| n-Heptane                           | 0.0000             | C7 Non-Aromatics                    | 0.0000    | 0.0000        | 0.0000       |               |
| n-Octane                            | 0.0000             | C8 Non-Aromatics                    | 0.0000    | 0.0000        | 0.0000       |               |
| Benzene                             | 0.0000             | Benzene                             | 0.0000    | 0.0000        | 0.0000       |               |
| Toluene                             | 0.0000             | Toluene                             | 0.0000    | 0.0000        | 0.0000       |               |
| H <sub>2</sub> O                    | 0.0001             | Water/steam                         | 0.0001    | 0.0001        | 0.0000       | 0.00          |
| Nitrogen                            | 0.0000             | Nitrogen                            | 0.0000    | 0.0000        | 0.0000       |               |
| <b>Operation Condition</b>          |                    | <b>Operation Condition</b>          |           |               |              |               |
| Temperature (°C)                    | 40.50              | Temperature (°C)                    | 40.50     | 40.50         | 0.00         | 0.00          |
| Pressure (Kg/cm <sup>2</sup> gauge) | 27.72              | Pressure (Kg/cm <sup>2</sup> gauge) | 27.72     | 27.72         | 0.00         | 0.00          |
| Molar Flow (kgmole/h)               | 2582.43            | Molar Flow (kgmole/h)               | 2582.43   | 2582.43       | 0.00         | 0.00          |
| Mass Flow (kg/h)                    | 108797.00          | Mass Flow (kg/h)                    | 108797.00 | 108797.00     | 0.00         | 0.00          |
| Molecular Weight                    | 42.1297            | Molecular Weight                    | 42.1297   | 42.13         | 0.00         | 0.00          |
| Total                               | 1.0000             | Total                               | 1.0000    | 1.0000        |              |               |
| <b>Variable</b>                     | <b>108780.7184</b> | <b>4452</b>                         |           | <b>Design</b> | <b>Error</b> | <b>%Error</b> |
| <b>Component (%mol)</b>             |                    | <b>Component (%mol)</b>             |           |               |              |               |
| Hydrogen                            | 0.9650             | Hydrogen                            | 0.9650    | 0.9650        | 0.0000       | 0.00          |
| Methane                             | 0.0341             | Methane                             | 0.0341    | 0.0341        | 0.0000       | 0.00          |
| Ethane                              | 0.0000             | Ethane                              | 0.0000    | 0.0000        |              |               |
| M-acetylene                         | 0.0000             | Propadiene/Methylacetylene          | 0.0000    | 0.0000        |              |               |
| Propene                             | 0.0000             | Propylene                           | 0.0000    | 0.0000        |              |               |
| Propane                             | 0.0000             | Propane                             | 0.0000    | 0.0000        |              |               |
| 13-Butadiene                        | 0.0000             | Butadienes/C4Acetylenes             | 0.0000    | 0.0000        |              |               |
| 1-Butene                            | 0.0000             | Butylenes                           | 0.0000    | 0.0000        |              |               |
| n-Butane                            | 0.0000             | Butanes                             | 0.0000    | 0.0000        |              |               |
| i-Pentane                           | 0.0000             | C5-Hydrocarbons                     | 0.0000    | 0.0000        |              |               |
| 1-Hexyne                            | 0.0000             | C6 Non-Aromatics                    | 0.0000    | 0.0000        |              |               |
| n-Heptane                           | 0.0000             | C7 Non-Aromatics                    | 0.0000    | 0.0000        |              |               |
| n-Octane                            | 0.0000             | C8 Non-Aromatics                    | 0.0000    | 0.0000        |              |               |
| Benzene                             | 0.0000             | Benzene                             | 0.0000    | 0.0000        |              |               |
| Toluene                             | 0.0000             | Toluene                             | 0.0000    | 0.0000        |              |               |
| H <sub>2</sub> O                    | 0.0000             | Water/steam                         | 0.0000    | 0.0000        |              |               |
| Nitrogen                            | 0.0009             | Nitrogen                            | 0.0009    | 0.0009        | 0.0000       | 0.00          |
| <b>Operation Condition</b>          |                    | <b>Operation Condition</b>          |           |               |              |               |
| Temperature (°C)                    | 16.00              | Temperature (°C)                    | 16.00     | 16.00         | 0.00         | 0.00          |

# Simulation Report – ECC 860 KTA

## Working Stage 6

|                                     |                    |                                     |          |               |              |               |
|-------------------------------------|--------------------|-------------------------------------|----------|---------------|--------------|---------------|
| Pressure (Kg/cm <sup>2</sup> gauge) | 26.67              | Pressure (Kg/cm <sup>2</sup> gauge) | 26.67    | 26.67         | 0.00         | 0.00          |
| Molar Flow (kgmole/h)               | 46.47              | Molar Flow (kgmole/h)               | 46.47    | 46.47         | 0.00         | 0.00          |
| Mass Flow (kg/h)                    | 117.00             | Mass Flow (kg/h)                    | 117.00   | 117.00        | 0.00         | 0.00          |
| Molecular Weight                    | 2.5177             | Molecular Weight                    | 2.5177   | 2.52          | 0.00         | 0.00          |
| Total                               | 0.9991             | Total                               | 0.9991   | 0.9991        |              |               |
| <b>Variable</b>                     | <b>Integration</b> | <b>4462</b>                         |          | <b>Design</b> | <b>Error</b> | <b>%Error</b> |
| <b>Component (%mol)</b>             |                    | <b>Component (%mol)</b>             |          |               |              |               |
| Hydrogen                            | 0.0002             | Hydrogen                            | 0.0002   | 0.0002        | 0.0000       | 0.00          |
| Methane                             | 0.0003             | Methane                             | 0.0003   | 0.0003        | 0.0000       | 0.00          |
| Ethane                              | 0.0000             | Ethane                              | 0.0000   | 0.0000        |              |               |
| M-acetylene                         | 0.0207             | Propadiene/Methylacetylene          | 0.0207   | 0.0207        | 0.0000       | 0.00          |
| Propene                             | 0.9371             | Propylene                           | 0.9371   | 0.9371        | 0.0000       | 0.00          |
| Propane                             | 0.0395             | Propane                             | 0.0395   | 0.0395        | 0.0000       | 0.00          |
| 13-Butadiene                        | 0.0007             | Butadienes/C4Acetylenes             | 0.0007   | 0.0007        | 0.0000       | 0.00          |
| 1-Butene                            | 0.0015             | Butylenes                           | 0.0015   | 0.0015        | 0.0000       | 0.00          |
| n-Butane                            | 0.0000             | Butanes                             | 0.0000   | 0.0000        |              |               |
| i-Pentane                           | 0.0000             | C5-Hydrocarbons                     | 0.0000   | 0.0000        |              |               |
| 1-Hexyne                            | 0.0000             | C6 Non-Aromatics                    | 0.0000   | 0.0000        |              |               |
| n-Heptane                           | 0.0000             | C7 Non-Aromatics                    | 0.0000   | 0.0000        |              |               |
| n-Octane                            | 0.0000             | C8 Non-Aromatics                    | 0.0000   | 0.0000        |              |               |
| Benzene                             | 0.0000             | Benzene                             | 0.0000   | 0.0000        |              |               |
| Toluene                             | 0.0000             | Toluene                             | 0.0000   | 0.0000        |              |               |
| H <sub>2</sub> O                    | 0.0000             | Water/steam                         | 0.0000   | 0.0000        |              |               |
| Nitrogen                            | 0.0000             | Nitrogen                            | 0.0000   | 0.0000        |              |               |
| <b>Operation Condition</b>          |                    | <b>Operation Condition</b>          |          |               |              |               |
| Temperature (°C)                    | 40.50              | Temperature (°C)                    | 40.50    | 40.50         | 0.00         | 0.00          |
| Pressure (Kg/cm <sup>2</sup> gauge) | 27.37              | Pressure (Kg/cm <sup>2</sup> gauge) | 27.37    | 27.37         | 0.00         | 0.00          |
| Molar Flow (kgmole/h)               | 1291.07            | Molar Flow (kgmole/h)               | 1291.07  | 1291.07       | 0.00         | 0.00          |
| Mass Flow (kg/h)                    | 54395.35           | Mass Flow (kg/h)                    | 54395.35 | 54395.35      | 0.00         | 0.00          |
| Molecular Weight                    | 42.1322            | Molecular Weight                    | 42.1322  | 42.13         | 0.00         | 0.00          |
| Total                               | 1.0000             | Total                               | 1.0000   | 1.0000        |              |               |
| <b>Variable</b>                     | <b>Integration</b> | <b>4463</b>                         |          | <b>Design</b> | <b>Error</b> | <b>%Error</b> |
| <b>Component (%mol)</b>             |                    | <b>Component (%mol)</b>             |          |               |              |               |
| Hydrogen                            | 0.0035             | Hydrogen                            | 0.0035   | 0.0035        | 0.0000       | 0.00          |
| Methane                             | 0.0015             | Methane                             | 0.0015   | 0.0015        | 0.0000       | 0.00          |
| Ethane                              | 0.0000             | Ethane                              | 0.0000   | 0.0000        |              |               |
| M-acetylene                         | 0.0000             | Propadiene/Methylacetylene          | 0.0000   | 0.0000        | 0.0000       |               |
| Propene                             | 0.9433             | Propylene                           | 0.9433   | 0.9433        | 0.0000       | 0.00          |
| Propane                             | 0.0495             | Propane                             | 0.0495   | 0.0495        | 0.0000       | 0.00          |
| 13-Butadiene                        | 0.0002             | Butadienes/C4Acetylenes             | 0.0002   | 0.0002        | 0.0000       | 0.00          |
| 1-Butene                            | 0.0020             | Butylenes                           | 0.0020   | 0.0020        | 0.0000       | 0.00          |
| n-Butane                            | 0.0000             | Butanes                             | 0.0000   | 0.0000        |              |               |
| i-Pentane                           | 0.0000             | C5-Hydrocarbons                     | 0.0000   | 0.0000        |              |               |

# Simulation Report – ECC 860 KTA

## Working Stage 6

|                                     |                    |                                     |            |               |              |               |
|-------------------------------------|--------------------|-------------------------------------|------------|---------------|--------------|---------------|
| 1-Hexyne                            | 0.0000             | C6 Non-Aromatics                    | 0.0000     | 0.0000        |              |               |
| n-Heptane                           | 0.0000             | C7 Non-Aromatics                    | 0.0000     | 0.0000        |              |               |
| n-Octane                            | 0.0000             | C8 Non-Aromatics                    | 0.0000     | 0.0000        |              |               |
| Benzene                             | 0.0000             | Benzene                             | 0.0000     | 0.0000        |              |               |
| Toluene                             | 0.0000             | Toluene                             | 0.0000     | 0.0000        |              |               |
| H <sub>2</sub> O                    | 0.0000             | Water/steam                         | 0.0000     | 0.0000        |              |               |
| Nitrogen                            | 0.0000             | Nitrogen                            | 0.0000     | 0.0000        |              |               |
| <b>Operation Condition</b>          |                    | <b>Operation Condition</b>          |            |               |              |               |
| Temperature (°C)                    | 60.73              | Temperature (°C)                    | 60.73      | 60.73         | 0.00         | 0.00          |
| Pressure (Kg/cm <sup>2</sup> gauge) | 25.83              | Pressure (Kg/cm <sup>2</sup> gauge) | 25.83      | 25.83         | 0.00         | 0.00          |
| Molar Flow (kgmole/h)               | 1296.97            | Molar Flow (kgmole/h)               | 1296.97    | 1296.97       | 0.00         | 0.00          |
| Mass Flow (kg/h)                    | 54512.35           | Mass Flow (kg/h)                    | 54512.35   | 54512.35      | 0.00         | 0.00          |
| Molecular Weight                    | 42.0305            | Molecular Weight                    | 42.0305    | 42.03         | 0.00         | 0.00          |
| Total                               | 1.0000             | Total                               | 1.0000     | 1.0000        |              |               |
| <b>Variable</b>                     | <b>Integration</b> | <b>4458</b>                         |            | <b>Design</b> | <b>Error</b> | <b>%Error</b> |
| <b>Component (%mol)</b>             |                    | <b>Component (%mol)</b>             |            |               |              |               |
| Hydrogen                            | 0.0005             | Hydrogen                            | 0.0005     | 0.0005        | 0.0000       | 0.00          |
| Methane                             | 0.0006             | Methane                             | 0.0006     | 0.0006        | 0.0000       | 0.00          |
| Ethane                              | 0.0000             | Ethane                              | 0.0000     | 0.0000        | 0.0000       | 0.00          |
| M-acetylene                         | 0.0002             | Propadiene/Methylacetylene          | 0.0002     | 0.0002        | 0.0000       | 0.00          |
| Propene                             | 0.9442             | Propylene                           | 0.9442     | 0.9442        | 0.0000       | 0.00          |
| Propane                             | 0.0517             | Propane                             | 0.0517     | 0.0517        | 0.0000       | 0.00          |
| 13-Butadiene                        | 0.0002             | Butadienes/C4Acetylenes             | 0.0002     | 0.0002        | 0.0000       | 0.00          |
| 1-Butene                            | 0.0026             | Butylenes                           | 0.0026     | 0.0026        | 0.0000       | 0.00          |
| n-Butane                            | 0.0000             | Butanes                             | 0.0000     | 0.0000        |              |               |
| i-Pentane                           | 0.0000             | C5-Hydrocarbons                     | 0.0000     | 0.0000        |              |               |
| 1-Hexyne                            | 0.0000             | C6 Non-Aromatics                    | 0.0000     | 0.0000        |              |               |
| n-Heptane                           | 0.0000             | C7 Non-Aromatics                    | 0.0000     | 0.0000        |              |               |
| n-Octane                            | 0.0000             | C8 Non-Aromatics                    | 0.0000     | 0.0000        |              |               |
| Benzene                             | 0.0000             | Benzene                             | 0.0000     | 0.0000        |              |               |
| Toluene                             | 0.0000             | Toluene                             | 0.0000     | 0.0000        |              |               |
| H <sub>2</sub> O                    | 0.0000             | Water/steam                         | 0.0000     | 0.0000        |              |               |
| Nitrogen                            | 0.0000             | Nitrogen                            | 0.0000     | 0.0000        |              |               |
| <b>Operation Condition</b>          |                    | <b>Operation Condition</b>          |            |               |              |               |
| Temperature (°C)                    | 43.30              | Temperature (°C)                    | 43.3000    | 43.30         | 0.00         | 0.00          |
| Pressure (Kg/cm <sup>2</sup> gauge) | 16.71              | Pressure (Kg/cm <sup>2</sup> gauge) | 16.7100    | 16.71         | 0.00         | 0.00          |
| Molar Flow (kgmole/h)               | 1203.20            | Molar Flow (kgmole/h)               | 1203.1953  | 1203.20       | 0.00         | 0.00          |
| Mass Flow (kg/h)                    | 50760.00           | Mass Flow (kg/h)                    | 50760.0000 | 50760.00      | 0.00         | 0.00          |
| Molecular Weight                    | 42.1877            | Molecular Weight                    | 42.1877    | 42.19         | 0.00         | 0.01          |
| Total                               | 1.0000             | Total                               | 1.0000     | 1.0000        |              |               |
| <b>Variable</b>                     | <b>Integration</b> | <b>4451</b>                         |            | <b>Design</b> | <b>Error</b> | <b>%Error</b> |
| <b>Component (%mol)</b>             |                    | <b>Component (%mol)</b>             |            |               |              |               |
| Hydrogen                            | 0.0002             | Hydrogen                            | 0.0002     | 0.0002        | 0.0000       | -0.01         |



# Simulation Report – ECC 860 KTA

## Working Stage 6

|                                     |                    |                                     |           |               |              |               |
|-------------------------------------|--------------------|-------------------------------------|-----------|---------------|--------------|---------------|
| Methane                             | 0.0003             | Methane                             | 0.0003    | 0.0003        | 0.0000       | -0.01         |
| Ethane                              | 0.0000             | Ethane                              | 0.0000    | 0.0000        | 0.0000       |               |
| M-acetylene                         | 0.0207             | Propadiene/Methylacetylene          | 0.0207    | 0.0207        | 0.0000       | -0.01         |
| Propene                             | 0.9371             | Propylene                           | 0.9371    | 0.9371        | 0.0000       | 0.00          |
| Propane                             | 0.0395             | Propane                             | 0.0395    | 0.0395        | 0.0000       | -0.01         |
| 13-Butadiene                        | 0.0007             | Butadienes/C4Acetylenes             | 0.0007    | 0.0007        | 0.0000       | -0.01         |
| 1-Butene                            | 0.0015             | Butylenes                           | 0.0015    | 0.0015        | 0.0000       | -0.01         |
| n-Butane                            | 0.0000             | Butanes                             | 0.0000    | 0.0000        |              |               |
| i-Pentane                           | 0.0000             | C5-Hydrocarbons                     | 0.0000    | 0.0000        |              |               |
| 1-Hexyne                            | 0.0000             | C6 Non-Aromatics                    | 0.0000    | 0.0000        |              |               |
| n-Heptane                           | 0.0000             | C7 Non-Aromatics                    | 0.0000    | 0.0000        |              |               |
| n-Octane                            | 0.0000             | C8 Non-Aromatics                    | 0.0000    | 0.0000        |              |               |
| Benzene                             | 0.0000             | Benzene                             | 0.0000    | 0.0000        |              |               |
| Toluene                             | 0.0000             | Toluene                             | 0.0000    | 0.0000        |              |               |
| H <sub>2</sub> O                    | 0.0000             | Water/steam                         | 0.0000    | 0.0000        |              |               |
| Nitrogen                            | 0.0000             | Nitrogen                            | 0.0000    | 0.0000        |              |               |
| <b>Operation Condition</b>          |                    |                                     |           |               |              |               |
| Temperature (°C)                    | 40.51              | Temperature (°C)                    | 40.51     | 40.50         | 0.01         | -0.03         |
| Pressure (Kg/cm <sup>2</sup> gauge) | 27.37              | Pressure (Kg/cm <sup>2</sup> gauge) | 27.37     | 27.37         | 0.00         | 0.00          |
| Molar Flow (kgmole/h)               | 2582.17            | Molar Flow (kgmole/h)               | 2582.17   | 2582.20       | 0.03         | 0.00          |
| Mass Flow (kg/h)                    | 108792.35          | Mass Flow (kg/h)                    | 108792.35 | 108793.00     | 0.65         | 0.00          |
| Molecular Weight                    | 42.1322            | Molecular Weight                    | 42.1322   | 42.13         | 0.00         | -0.01         |
| Total                               | 0.9999             | Total                               | 0.9999    | 0.9999        |              |               |
| <b>Variable</b>                     | <b>Integration</b> | <b>4459</b>                         |           | <b>Design</b> | <b>Error</b> | <b>%Error</b> |
| <b>Component (%mol)</b>             |                    | <b>Component (%mol)</b>             |           |               |              |               |
| Hydrogen                            | 0.0002             | Hydrogen                            | 0.0002    | 0.0002        | 0.0000       | -0.01         |
| Methane                             | 0.0003             | Methane                             | 0.0003    | 0.0003        | 0.0000       | -0.01         |
| Ethane                              | 0.0000             | Ethane                              | 0.0000    | 0.0000        |              |               |
| M-acetylene                         | 0.0207             | Propadiene/Methylacetylene          | 0.0207    | 0.0207        | 0.0000       | -0.01         |
| Propene                             | 0.9371             | Propylene                           | 0.9371    | 0.9371        | 0.0000       | 0.00          |
| Propane                             | 0.0395             | Propane                             | 0.0395    | 0.0395        | 0.0000       | -0.01         |
| 13-Butadiene                        | 0.0007             | Butadienes/C4Acetylenes             | 0.0007    | 0.0007        | 0.0000       | -0.01         |
| 1-Butene                            | 0.0015             | Butylenes                           | 0.0015    | 0.0015        | 0.0000       | -0.01         |
| n-Butane                            | 0.0000             | Butanes                             | 0.0000    | 0.0000        |              |               |
| i-Pentane                           | 0.0000             | C5-Hydrocarbons                     | 0.0000    | 0.0000        |              |               |
| 1-Hexyne                            | 0.0000             | C6 Non-Aromatics                    | 0.0000    | 0.0000        |              |               |
| n-Heptane                           | 0.0000             | C7 Non-Aromatics                    | 0.0000    | 0.0000        |              |               |
| n-Octane                            | 0.0000             | C8 Non-Aromatics                    | 0.0000    | 0.0000        |              |               |
| Benzene                             | 0.0000             | Benzene                             | 0.0000    | 0.0000        |              |               |
| Toluene                             | 0.0000             | Toluene                             | 0.0000    | 0.0000        |              |               |
| H <sub>2</sub> O                    | 0.0000             | Water/steam                         | 0.0000    | 0.0000        |              |               |
| Nitrogen                            | 0.0000             | Nitrogen                            | 0.0000    | 0.0000        |              |               |
| <b>Operation Condition</b>          |                    | <b>Operation Condition</b>          |           |               |              |               |

# Simulation Report – ECC 860 KTA

## Working Stage 6

|                                     |                    |                                     |          |               |              |               |
|-------------------------------------|--------------------|-------------------------------------|----------|---------------|--------------|---------------|
| Temperature (°C)                    | 40.51              | Temperature (°C)                    | 40.51    | 40.50         | 0.01         | -0.03         |
| Pressure (Kg/cm <sup>2</sup> gauge) | 27.37              | Pressure (Kg/cm <sup>2</sup> gauge) | 27.37    | 27.37         | 0.00         | 0.00          |
| Molar Flow (kgmole/h)               | 1291.10            | Molar Flow (kgmole/h)               | 1291.10  | 1291.10       | 0.00         | 0.00          |
| Mass Flow (kg/h)                    | 54397.00           | Mass Flow (kg/h)                    | 54397.00 | 54397.00      | 0.00         | 0.00          |
| Molecular Weight                    | 42.1322            | Molecular Weight                    | 42.1322  | 42.13         | 0.00         | -0.01         |
| Total                               | 1.0000             | Total                               | 1.0000   | 1.0000        |              |               |
| <b>Variable</b>                     | <b>Integration</b> | <b>4460</b>                         |          | <b>Design</b> | <b>Error</b> | <b>%Error</b> |
| <b>Component (%mol)</b>             |                    | <b>Component (%mol)</b>             |          |               |              |               |
| Hydrogen                            | 0.9650             | Hydrogen                            | 0.9650   | 0.9650        | 0.0000       | 0.00          |
| Methane                             | 0.0341             | Methane                             | 0.0341   | 0.0341        | 0.0000       | 0.00          |
| Ethane                              | 0.0000             | Ethane                              | 0.0000   | 0.0000        |              |               |
| M-acetylene                         | 0.0000             | Propadiene/Methylacetylene          | 0.0000   | 0.0000        |              |               |
| Propene                             | 0.0000             | Propylene                           | 0.0000   | 0.0000        |              |               |
| Propane                             | 0.0000             | Propane                             | 0.0000   | 0.0000        |              |               |
| 13-Butadiene                        | 0.0000             | Butadienes/C4Acetylenes             | 0.0000   | 0.0000        |              |               |
| 1-Butene                            | 0.0000             | Butylenes                           | 0.0000   | 0.0000        |              |               |
| n-Butane                            | 0.0000             | Butanes                             | 0.0000   | 0.0000        |              |               |
| i-Pentane                           | 0.0000             | C5-Hydrocarbons                     | 0.0000   | 0.0000        |              |               |
| 1-Hexyne                            | 0.0000             | C6 Non-Aromatics                    | 0.0000   | 0.0000        |              |               |
| n-Heptane                           | 0.0000             | C7 Non-Aromatics                    | 0.0000   | 0.0000        |              |               |
| n-Octane                            | 0.0000             | C8 Non-Aromatics                    | 0.0000   | 0.0000        |              |               |
| Benzene                             | 0.0000             | Benzene                             | 0.0000   | 0.0000        |              |               |
| Toluene                             | 0.0000             | Toluene                             | 0.0000   | 0.0000        |              |               |
| H <sub>2</sub> O                    | 0.0000             | Water/steam                         | 0.0000   | 0.0000        |              |               |
| Nitrogen                            | 0.0009             | Nitrogen                            | 0.0009   | 0.0009        | 0.0000       | 0.0009        |
| <b>Operation Condition</b>          |                    | <b>Operation Condition</b>          |          |               |              |               |
| Temperature (°C)                    | 15.97              | Temperature (°C)                    | 15.97    | 16.00         | 0.03         | 0.21          |
| Pressure (Kg/cm <sup>2</sup> gauge) | 26.67              | Pressure (Kg/cm <sup>2</sup> gauge) | 26.67    | 26.67         | 0.00         | 0.00          |
| Molar Flow (kgmole/h)               | 46.47              | Molar Flow (kgmole/h)               | 46.47    | 46.40         | 0.07         | -0.15         |
| Mass Flow (kg/h)                    | 117.00             | Mass Flow (kg/h)                    | 117.00   | 117.00        | 0.00         | 0.00          |
| Molecular Weight                    | 2.5177             | Molecular Weight                    | 2.5177   | 2.52          | 0.00         | 0.09          |
| Total                               | 0.9991             | Total                               | 0.9991   | 0.9991        |              |               |
| <b>Variable</b>                     | <b>Integration</b> | <b>4454</b>                         |          | <b>Design</b> | <b>Error</b> | <b>%Error</b> |
| <b>Component (%mol)</b>             |                    | <b>Component (%mol)</b>             |          |               |              |               |
| Hydrogen                            | 0.0035             | Hydrogen                            | 0.0035   | 0.0036        | 0.0001       | 2.81          |
| Methane                             | 0.0015             | Methane                             | 0.0015   | 0.0015        | 0.0000       | -1.36         |
| Ethane                              | 0.0000             | Ethane                              | 0.0000   | 0.0000        |              |               |
| M-acetylene                         | 0.0000             | Propadiene/Methylacetylene          | 0.0000   | 0.0002        | 0.0002       | 100.00        |
| Propene                             | 0.9433             | Propylene                           | 0.9433   | 0.9430        | 0.0003       | -0.03         |
| Propane                             | 0.0495             | Propane                             | 0.0495   | 0.0495        | 0.0000       | -0.01         |
| 13-Butadiene                        | 0.0002             | Butadienes/C4Acetylenes             | 0.0002   | 0.0002        | 0.0000       | -4.53         |
| 1-Butene                            | 0.0020             | Butylenes                           | 0.0020   | 0.0020        | 0.0000       | 0.94          |
| n-Butane                            | 0.0000             | Butanes                             | 0.0000   | 0.0000        |              |               |

# Simulation Report – ECC 860 KTA

## Working Stage 6

|                                     |                    |                                     |           |               |              |               |
|-------------------------------------|--------------------|-------------------------------------|-----------|---------------|--------------|---------------|
| i-Pentane                           | 0.0000             | C5-Hydrocarbons                     | 0.0000    | 0.0000        |              |               |
| 1-Hexyne                            | 0.0000             | C6 Non-Aromatics                    | 0.0000    | 0.0000        |              |               |
| n-Heptane                           | 0.0000             | C7 Non-Aromatics                    | 0.0000    | 0.0000        |              |               |
| n-Octane                            | 0.0000             | C8 Non-Aromatics                    | 0.0000    | 0.0000        |              |               |
| Benzene                             | 0.0000             | Benzene                             | 0.0000    | 0.0000        |              |               |
| Toluene                             | 0.0000             | Toluene                             | 0.0000    | 0.0000        |              |               |
| H <sub>2</sub> O                    | 0.0000             | Water/steam                         | 0.0000    | 0.0000        |              |               |
| Nitrogen                            | 0.0000             | Nitrogen                            | 0.0000    | 0.0000        |              |               |
| <b>Operation Condition</b>          |                    | <b>Operation Condition</b>          |           |               |              |               |
| Temperature (°C)                    | 60.73              | Temperature (°C)                    | 60.73     | 61.20         | 0.47         | 0.77          |
| Pressure (Kg/cm <sup>2</sup> gauge) | 25.83              | Pressure (Kg/cm <sup>2</sup> gauge) | 25.83     | 25.49         | 0.34         | -1.33         |
| Molar Flow (kgmole/h)               | 2593.98            | Molar Flow (kgmole/h)               | 2593.98   | 2594.30       | 0.32         | 0.01          |
| Mass Flow (kg/h)                    | 109026.35          | Mass Flow (kg/h)                    | 109026.35 | 109027.00     | 0.65         | 0.00          |
| Molecular Weight                    | 42.0305            | Molecular Weight                    | 42.0305   | 42.03         | 0.00         | 0.00          |
| Total                               | 1.0000             | Total                               | 1.0000    | 1.0000        |              |               |
| <b>Variable</b>                     | <b>Integration</b> | <b>4501</b>                         |           | <b>Design</b> | <b>Error</b> | <b>%Error</b> |
| <b>Component (%mol)</b>             |                    | <b>Component (%mol)</b>             |           |               |              |               |
| Hydrogen                            | 0.0063             | Hydrogen                            | 0.0063    | 0.0063        | 0.0000       | -0.01         |
| Methane                             | 0.0023             | Methane                             | 0.0023    | 0.0023        | 0.0000       | -0.01         |
| Ethane                              | 0.0000             | Ethane                              | 0.0000    | 0.0000        | 0.0000       | #DIV/0!       |
| M-acetylene                         | 0.0002             | Propadiene/Methylacetylene          | 0.0002    | 0.0002        | 0.0000       | -0.01         |
| Propene                             | 0.9420             | Propylene                           | 0.9420    | 0.9419        | 0.0001       | -0.01         |
| Propane                             | 0.0476             | Propane                             | 0.0476    | 0.0476        | 0.0000       | -0.01         |
| 13-Butadiene                        | 0.0001             | Butadienes/C4Acetylenes             | 0.0001    | 0.0001        | 0.0000       | -0.01         |
| 1-Butene                            | 0.0015             | Butylenes                           | 0.0015    | 0.0015        | 0.0000       | -0.01         |
| n-Butane                            | 0.0000             | Butanes                             | 0.0000    | 0.0000        |              |               |
| i-Pentane                           | 0.0000             | C5-Hydrocarbons                     | 0.0000    | 0.0000        |              |               |
| 1-Hexyne                            | 0.0000             | C6 Non-Aromatics                    | 0.0000    | 0.0000        |              |               |
| n-Heptane                           | 0.0000             | C7 Non-Aromatics                    | 0.0000    | 0.0000        |              |               |
| n-Octane                            | 0.0000             | C8 Non-Aromatics                    | 0.0000    | 0.0000        |              |               |
| Benzene                             | 0.0000             | Benzene                             | 0.0000    | 0.0000        |              |               |
| Toluene                             | 0.0000             | Toluene                             | 0.0000    | 0.0000        |              |               |
| H <sub>2</sub> O                    | 0.0000             | Water/steam                         | 0.0000    | 0.0000        |              |               |
| Nitrogen                            | 0.0000             | Nitrogen                            | 0.0000    | 0.0001        |              |               |
| <b>Operation Condition</b>          |                    | <b>Operation Condition</b>          |           |               |              |               |
| Temperature (°C)                    | 50.90              | Temperature (°C)                    | 50.90     | 50.90         | 0.00         | 0.00          |
| Pressure (Kg/cm <sup>2</sup> gauge) | 19.17              | Pressure (Kg/cm <sup>2</sup> gauge) | 19.17     | 19.16         | 0.01         | -0.05         |
| Molar Flow (kgmole/h)               | 951.94             | Molar Flow (kgmole/h)               | 951.94    | 951.90        | 0.04         | 0.00          |
| Mass Flow (kg/h)                    | 39873.00           | Mass Flow (kg/h)                    | 39873.00  | 39873.00      | 0.00         | 0.00          |
| Molecular Weight                    | 41.8861            | Molecular Weight                    | 41.8861   | 41.89         | 0.00         | 0.01          |
| Total                               | 0.9999             | Total                               | 0.9999    | 0.9999        |              |               |
| <b>Variable</b>                     | <b>Integration</b> | <b>4017</b>                         |           | <b>Design</b> | <b>Error</b> | <b>%Error</b> |
| <b>Component (%mol)</b>             |                    | <b>Component (%mol)</b>             |           |               |              |               |

# Simulation Report – ECC 860 KTA

## Working Stage 6

|                                     |                    |                                     |        |               |              |               |
|-------------------------------------|--------------------|-------------------------------------|--------|---------------|--------------|---------------|
| Hydrogen                            | 0.9650             | Hydrogen                            | 0.9650 | 0.9650        | 0.0000       | 0.00          |
| Methane                             | 0.0341             | Methane                             | 0.0341 | 0.0341        | 0.0000       | 0.00          |
| Ethane                              | 0.0000             | Ethane                              | 0.0000 | 0.0000        |              |               |
| M-acetylene                         | 0.0000             | Propadiene/Methylacetylene          | 0.0000 | 0.0000        |              |               |
| Propene                             | 0.0000             | Propylene                           | 0.0000 | 0.0000        |              |               |
| Propane                             | 0.0000             | Propane                             | 0.0000 | 0.0000        |              |               |
| 13-Butadiene                        | 0.0000             | Butadienes/C4Acetylenes             | 0.0000 | 0.0000        |              |               |
| 1-Butene                            | 0.0000             | Butylenes                           | 0.0000 | 0.0000        |              |               |
| n-Butane                            | 0.0000             | Butanes                             | 0.0000 | 0.0000        |              |               |
| i-Pentane                           | 0.0000             | C5-Hydrocarbons                     | 0.0000 | 0.0000        |              |               |
| 1-Hexyne                            | 0.0000             | C6 Non-Aromatics                    | 0.0000 | 0.0000        |              |               |
| n-Heptane                           | 0.0000             | C7 Non-Aromatics                    | 0.0000 | 0.0000        |              |               |
| n-Octane                            | 0.0000             | C8 Non-Aromatics                    | 0.0000 | 0.0000        |              |               |
| Benzene                             | 0.0000             | Benzene                             | 0.0000 | 0.0000        |              |               |
| Toluene                             | 0.0000             | Toluene                             | 0.0000 | 0.0000        |              |               |
| H <sub>2</sub> O                    | 0.0000             | Water/steam                         | 0.0000 | 0.0000        |              |               |
| Nitrogen                            | 0.0009             | Nitrogen                            | 0.0009 | 0.0009        | 0.0000       | 0.00          |
| <b>Operation Condition</b>          |                    | <b>Operation Condition</b>          |        |               |              |               |
| Temperature (°C)                    | 16.00              | Temperature (°C)                    | 16.00  | 16.00         | 0.00         | 0.00          |
| Pressure (Kg/cm <sup>2</sup> gauge) | 31.07              | Pressure (Kg/cm <sup>2</sup> gauge) | 31.07  | 31.07         | 0.00         | 0.00          |
| Molar Flow (kgmole/h)               | 92.94              | Molar Flow (kgmole/h)               | 92.94  | 92.94         | 0.00         | 0.00          |
| Mass Flow (kg/h)                    | 234.00             | Mass Flow (kg/h)                    | 234.00 | 234.00        | 0.00         | 0.00          |
| Molecular Weight                    | 2.5177             | Molecular Weight                    | 2.5177 | 2.52          | 0.00         | 0.00          |
| Total                               | 0.9991             | Total                               | 0.9991 | 0.9991        |              |               |
| <b>Variable</b>                     | <b>Integration</b> | <b>4464</b>                         |        | <b>Design</b> | <b>Error</b> | <b>%Error</b> |
| <b>Component (%mol)</b>             |                    | <b>Component (%mol)</b>             |        |               |              |               |
| Hydrogen                            | 0.0035             | Hydrogen                            | 0.0035 | 0.0036        | 0.0000       | 2.82          |
| Methane                             | 0.0015             | Methane                             | 0.0015 | 0.0015        | 0.0000       | -1.36         |
| Ethane                              | 0.0000             | Ethane                              | 0.0000 | 0.0000        |              |               |
| M-acetylene                         | 0.0000             | Propadiene/Methylacetylene          | 0.0000 | 0.0002        | 0.0000       | 100.00        |
| Propene                             | 0.9433             | Propylene                           | 0.9433 | 0.9430        | 0.0000       | -0.03         |
| Propane                             | 0.0495             | Propane                             | 0.0495 | 0.0495        | 0.0000       | -0.01         |
| 13-Butadiene                        | 0.0002             | Butadienes/C4Acetylenes             | 0.0002 | 0.0002        | 0.0000       | -4.53         |
| 1-Butene                            | 0.0020             | Butylenes                           | 0.0020 | 0.0020        | 0.0000       | 0.94          |
| n-Butane                            | 0.0000             | Butanes                             | 0.0000 | 0.0000        |              |               |
| i-Pentane                           | 0.0000             | C5-Hydrocarbons                     | 0.0000 | 0.0000        |              |               |
| 1-Hexyne                            | 0.0000             | C6 Non-Aromatics                    | 0.0000 | 0.0000        |              |               |
| n-Heptane                           | 0.0000             | C7 Non-Aromatics                    | 0.0000 | 0.0000        |              |               |
| n-Octane                            | 0.0000             | C8 Non-Aromatics                    | 0.0000 | 0.0000        |              |               |
| Benzene                             | 0.0000             | Benzene                             | 0.0000 | 0.0000        |              |               |
| Toluene                             | 0.0000             | Toluene                             | 0.0000 | 0.0000        |              |               |
| H <sub>2</sub> O                    | 0.0000             | Water/steam                         | 0.0000 | 0.0000        |              |               |
| Nitrogen                            | 0.0000             | Nitrogen                            | 0.0000 | 0.0000        |              |               |

# Simulation Report – ECC 860 KTA

## Working Stage 6

| Operation Condition                 |             | Operation Condition                 |          |          |        |         |
|-------------------------------------|-------------|-------------------------------------|----------|----------|--------|---------|
| Temperature (°C)                    | 60.73       | Temperature (°C)                    | 60.73    | 61.70    | 0.00   | 0.00    |
| Pressure (Kg/cm <sup>2</sup> gauge) | 25.83       | Pressure (Kg/cm <sup>2</sup> gauge) | 25.83    | 25.83    | 0.00   | 0.00    |
| Molar Flow (kgmole/h)               | 1297.01     | Molar Flow (kgmole/h)               | 1297.01  | 1297.10  | 0.00   | 0.00    |
| Mass Flow (kg/h)                    | 54514.00    | Mass Flow (kg/h)                    | 54514.00 | 54514.00 | 0.00   | 0.00    |
| Molecular Weight                    | 42.0305     | Molecular Weight                    | 42.0305  | 42.03    | 0.00   | 0.00    |
| Total                               | 1.0000      | Total                               | 1.0000   | 1.0000   |        |         |
| Variable                            | Integration | 4461                                |          | Design   | Error  | %Error  |
| Component (%mol)                    |             | Component (%mol)                    |          |          |        |         |
| Hydrogen                            | 0.0337      | Hydrogen                            | 0.0337   | 0.0337   | 0.0000 | -0.06   |
| Methane                             | 0.0015      | Methane                             | 0.0015   | 0.0014   | 0.0001 | -5.31   |
| Ethane                              | 0.0000      | Ethane                              | 0.0000   | 0.0000   |        |         |
| M-acetylene                         | 0.0200      | Propadiene/Methylacetylene          | 0.0200   | 0.0200   | 0.0000 | 0.09    |
| Propene                             | 0.9045      | Propylene                           | 0.9045   | 0.9046   | 0.0001 | 0.01    |
| Propane                             | 0.0381      | Propane                             | 0.0381   | 0.0381   | 0.0000 | -0.08   |
| 13-Butadiene                        | 0.0007      | Butadienes/C4Acetylenes             | 0.0007   | 0.0007   | 0.0000 | 3.46    |
| 1-Butene                            | 0.0014      | Butylenes                           | 0.0014   | 0.0014   | 0.0000 | -3.43   |
| n-Butane                            | 0.0000      | Butanes                             | 0.0000   | 0.0000   |        |         |
| i-Pentane                           | 0.0000      | C5-Hydrocarbons                     | 0.0000   | 0.0000   |        |         |
| 1-Hexyne                            | 0.0000      | C6 Non-Aromatics                    | 0.0000   | 0.0000   |        |         |
| n-Heptane                           | 0.0000      | C7 Non-Aromatics                    | 0.0000   | 0.0000   |        |         |
| n-Octane                            | 0.0000      | C8 Non-Aromatics                    | 0.0000   | 0.0000   |        |         |
| Benzene                             | 0.0000      | Benzene                             | 0.0000   | 0.0000   |        |         |
| Toluene                             | 0.0000      | Toluene                             | 0.0000   | 0.0000   |        |         |
| H <sub>2</sub> O                    | 0.0000      | Water/steam                         | 0.0000   | 0.0000   |        |         |
| Nitrogen                            | 0.0000      | Nitrogen                            | 0.0000   | 0.0000   |        |         |
| Operation Condition                 |             | Operation Condition                 |          |          |        |         |
| Temperature (°C)                    | 35.77       | Temperature (°C)                    | 35.77    | 36.00    | 0.23   | 0.64    |
| Pressure (Kg/cm <sup>2</sup> gauge) | 26.67       | Pressure (Kg/cm <sup>2</sup> gauge) | 26.67    | 26.53    | 0.14   | -0.53   |
| Molar Flow (kgmole/h)               | 1337.54     | Molar Flow (kgmole/h)               | 1337.54  | 1337.50  | 0.04   | 0.00    |
| Mass Flow (kg/h)                    | 54512.35    | Mass Flow (kg/h)                    | 54512.35 | 54514.00 | 1.65   | 0.00    |
| Molecular Weight                    | 40.7558     | Molecular Weight                    | 40.7558  | 40.76    | 0.00   | 0.01    |
| Total                               | 1.0000      | Total                               | 1.0000   | 0.9999   |        |         |
| Variable                            | Integration | 4457                                |          | Design   | Error  | %Error  |
| Component (%mol)                    |             | Component (%mol)                    |          |          |        |         |
| Hydrogen                            | 0.0064      | Hydrogen                            | 0.0064   | 0.0063   | 0.0001 | -2.23   |
| Methane                             | 0.0027      | Methane                             | 0.0027   | 0.0023   | 0.0004 | -15.85  |
| Ethane                              | 0.0000      | Ethane                              | 0.0000   | 0.0000   |        | #DIV/0! |
| M-acetylene                         | 0.0000      | Propadiene/Methylacetylene          | 0.0000   | 0.0002   | 0.0002 | 100.00  |
| Propene                             | 0.9423      | Propylene                           | 0.9423   | 0.9419   | 0.0004 | -0.04   |
| Propane                             | 0.0473      | Propane                             | 0.0473   | 0.0476   | 0.0003 | 0.67    |
| 13-Butadiene                        | 0.0001      | Butadienes/C4Acetylenes             | 0.0001   | 0.0001   | 0.0000 | -20.23  |
| 1-Butene                            | 0.0011      | Butylenes                           | 0.0011   | 0.0015   | 0.0004 | 23.50   |

# Simulation Report – ECC 860 KTA

## Working Stage 6

|                                     |                    |                                     |          |               |              |               |
|-------------------------------------|--------------------|-------------------------------------|----------|---------------|--------------|---------------|
| n-Butane                            | 0.0000             | Butanes                             | 0.0000   | 0.0000        |              |               |
| i-Pentane                           | 0.0000             | C5-Hydrocarbons                     | 0.0000   | 0.0000        |              |               |
| 1-Hexyne                            | 0.0000             | C6 Non-Aromatics                    | 0.0000   | 0.0000        |              |               |
| n-Heptane                           | 0.0000             | C7 Non-Aromatics                    | 0.0000   | 0.0000        |              |               |
| n-Octane                            | 0.0000             | C8 Non-Aromatics                    | 0.0000   | 0.0000        |              |               |
| Benzene                             | 0.0000             | Benzene                             | 0.0000   | 0.0000        |              |               |
| Toluene                             | 0.0000             | Toluene                             | 0.0000   | 0.0000        |              |               |
| H <sub>2</sub> O                    | 0.0000             | Water/steam                         | 0.0000   | 0.0000        |              |               |
| Nitrogen                            | 0.0001             | Nitrogen                            | 0.0001   | 0.0001        |              |               |
| <b>Operation Condition</b>          |                    | <b>Operation Condition</b>          |          |               |              |               |
| Temperature (°C)                    | 61.24              | Temperature (°C)                    | 61.24    | 62.10         | 0.86         | 1.39          |
| Pressure (Kg/cm <sup>2</sup> gauge) | 25.49              | Pressure (Kg/cm <sup>2</sup> gauge) | 25.49    | 25.49         | 0.00         | 0.00          |
| Molar Flow (kgmole/h)               | 1391.74            | Molar Flow (kgmole/h)               | 1391.74  | 1391.00       | 0.74         | -0.05         |
| Mass Flow (kg/h)                    | 58265.33           | Mass Flow (kg/h)                    | 58265.33 | 58265.00      | 0.33         | 0.00          |
| Molecular Weight                    | 41.8652            | Molecular Weight                    | 41.87    | 41.89         | 0.02         | 0.06          |
| Total                               | 0.9999             | Total                               | 0.9999   | 0.9999        |              |               |
| <b>Variable</b>                     | <b>Integration</b> | <b>4551</b>                         |          | <b>Design</b> | <b>Error</b> | <b>%Error</b> |
| <b>Component (%mol)</b>             |                    | <b>Component (%mol)</b>             |          |               |              |               |
| Hydrogen                            | 0.0063             | Hydrogen                            | 0.0063   | 0.0063        | 0.0000       | 0.00          |
| Methane                             | 0.0023             | Methane                             | 0.0023   | 0.0023        | 0.0000       | 0.00          |
| Ethane                              | 0.0000             | Ethane                              | 0.0000   | 0.0000        | 0.0000       | #DIV/0!       |
| M-acetylene                         | 0.0002             | Propadiene/Methylacetylene          | 0.0002   | 0.0002        | 0.0000       | 0.00          |
| Propene                             | 0.9419             | Propylene                           | 0.9419   | 0.9419        | 0.0000       | 0.00          |
| Propane                             | 0.0476             | Propane                             | 0.0476   | 0.0476        | 0.0000       | 0.00          |
| 13-Butadiene                        | 0.0001             | Butadienes/C4Acetylenes             | 0.0001   | 0.0001        | 0.0000       | 0.00          |
| 1-Butene                            | 0.0015             | Butylenes                           | 0.0015   | 0.0015        | 0.0000       | 0.00          |
| n-Butane                            | 0.0000             | Butanes                             | 0.0000   | 0.0000        |              |               |
| i-Pentane                           | 0.0000             | C5-Hydrocarbons                     | 0.0000   | 0.0000        |              |               |
| 1-Hexyne                            | 0.0000             | C6 Non-Aromatics                    | 0.0000   | 0.0000        |              |               |
| n-Heptane                           | 0.0000             | C7 Non-Aromatics                    | 0.0000   | 0.0000        |              |               |
| n-Octane                            | 0.0000             | C8 Non-Aromatics                    | 0.0000   | 0.0000        |              |               |
| Benzene                             | 0.0000             | Benzene                             | 0.0000   | 0.0000        |              |               |
| Toluene                             | 0.0000             | Toluene                             | 0.0000   | 0.0000        |              |               |
| H <sub>2</sub> O                    | 0.0000             | Water/steam                         | 0.0000   | 0.0000        | 0.0001       | #DIV/0!       |
| Nitrogen                            | 0.0001             | Nitrogen                            | 0.0001   | 0.0001        |              |               |
| <b>Operation Condition</b>          |                    |                                     |          |               |              |               |
| Temperature (°C)                    |                    | <b>Operation Condition</b>          |          |               |              |               |
| Pressure (Kg/cm <sup>2</sup> gauge) | 50.90              | Temperature (°C)                    | 50.90    | 50.90         | 0.00         | 0.00          |
| Molar Flow (kgmole/h)               | 19.19              | Pressure (Kg/cm <sup>2</sup> gauge) | 19.19    | 19.19         | 0.00         | 0.00          |
| Mass Flow (kg/h)                    | 439.11             | Molar Flow (kgmole/h)               | 439.11   | 439.10        | 0.01         | 0.00          |
| Molecular Weight                    | 18392.00           | Mass Flow (kg/h)                    | 18392.00 | 18392.00      | 0.00         | 0.00          |
| Total                               | 41.8847            | Molecular Weight                    | 41.8652  | 41.89         | 0.02         | 0.06          |

**Simulation Report – ECC 860 KTA**  
**Working Stage 6**

**Table A.4.2. Debutanizer Stream Compositions**

| Variable                            | Integration | 4601                                |          | Design   | %Error |
|-------------------------------------|-------------|-------------------------------------|----------|----------|--------|
| Component (%mol)                    |             | Component (%mol)                    |          |          |        |
| Hydrogen                            | 0.0000      | Hydrogen                            | 0.0000   | 0.0000   |        |
| Methane                             | 0.0000      | Methane                             | 0.0000   | 0.0000   |        |
| Acetylene                           | 0.0000      | Acetylene                           | 0.0000   | 0.0000   |        |
| Ethylene                            | 0.0000      | Ethylene                            | 0.0000   | 0.0000   |        |
| Ethane                              | 0.0000      | Ethane                              | 0.0000   | 0.0000   |        |
| Propadiene                          | 0.0036      | Propadiene/Methylacetylene          | 0.0036   | 0.0036   | -0.01  |
| Propene                             | 0.0001      | Propylene                           | 0.0001   | 0.0001   | -0.01  |
| Propane                             | 0.0000      | Propane                             | 0.0000   | 0.0000   |        |
| 13-Butadiene                        | 0.2064      | Butadienes/C4Acetylenes             | 0.2064   | 0.2064   | -0.01  |
| i-Butene                            | 0.2848      | Butylenes                           | 0.2848   | 0.2848   | -0.01  |
| n-butane                            | 0.1006      | Butanes                             | 0.1006   | 0.1006   | -0.01  |
| 1-Pentyne                           | 0.0630      | C5-Hydrocarbons                     | 0.1701   | 0.1701   | 0.00   |
| 14-Pentadiene                       | 0.1071      | C6 Non-Aromatics                    | 0.0478   | 0.0478   | -0.01  |
| cis3-Hexene                         | 0.0478      | C7 Non-Aromatics                    | 0.0135   | 0.0135   | -0.01  |
| n-Heptane                           | 0.0135      | C8 Non-Aromatics                    | 0.0013   | 0.0013   | -0.01  |
| n-Octane                            | 0.0013      | Benzene                             | 0.1391   | 0.1391   | -0.01  |
| Benzene                             | 0.1391      | Toluene                             | 0.0317   | 0.0317   | -0.01  |
| Toluene                             | 0.0317      | Xylenes/Ethylbenzene                | 0.0007   | 0.0007   | -0.01  |
| p-Xylene                            | 0.0007      | Styrene                             | 0.0002   | 0.0002   | -0.01  |
| E-Benzene                           | 0.0000      | C9-205°C                            | 0.0000   | 0.0000   |        |
| Styrene                             | 0.0002      | 205-288°C PGO                       | 0.0000   | 0.0000   |        |
| E-Norbornene                        | 0.0000      |                                     |          |          |        |
| n-Decane                            | 0.0000      |                                     |          |          |        |
| n-C <sub>11</sub>                   | 0.0000      |                                     |          |          |        |
| n-C <sub>12</sub>                   | 0.0000      |                                     |          |          |        |
| n-C <sub>13</sub>                   | 0.0000      |                                     |          |          |        |
| n-C <sub>14</sub>                   |             |                                     |          |          |        |
| Operation Condition                 |             | Operation Condition                 |          |          |        |
| Temperature (°C)                    | 63.80       | Temperature (°C)                    | 63.80    | 63.80    | 0.00   |
| Pressure (Kg/cm <sup>2</sup> gauge) | 4.48        | Pressure (Kg/cm <sup>2</sup> gauge) | 4.48     | 4.48     | 0.00   |
| Molar Flow (kgmole/h)               | 1193.92     | Molar Flow (kgmole/h)               | 1193.92  | 1193.90  | 0.00   |
| Mass Flow (kg/h)                    | 76576.00    | Mass Flow (kg/h)                    | 76576.00 | 76576.00 | 0.00   |
| Molecular Weight                    | 64.1385     | Molecular Weight                    | 64.1385  | 64.14    | 0.00   |
| Total                               | 1.0000      | Total                               | 1.0000   | 0.9999   |        |
| Variable                            | Integration | 4611                                |          | Design   | %Error |
| Component (%mol)                    |             | Component (%mol)                    |          |          |        |
| Hydrogen                            | 0.0000      | Hydrogen                            | 0.0000   | 0.0000   |        |
| Methane                             | 0.0000      | Methane                             | 0.0000   | 0.0000   |        |

# Simulation Report – ECC 860 KTA

## Working Stage 6

|                                     |                    |                                     |          |               |               |
|-------------------------------------|--------------------|-------------------------------------|----------|---------------|---------------|
| Acetylene                           | 0.0000             | Acetylene                           | 0.0000   | 0.0000        |               |
| Ethylene                            | 0.0000             | Ethylene                            | 0.0000   | 0.0000        |               |
| Ethane                              | 0.0000             | Ethane                              | 0.0000   | 0.0000        |               |
| Propadiene                          | 0.0000             | Propadiene/Methylacetylene          | 0.0000   | 0.0000        |               |
| Propene                             | 0.0000             | Propylene                           | 0.0000   | 0.0000        |               |
| Propane                             | 0.0000             | Propane                             | 0.0000   | 0.0000        |               |
| 13-Butadiene                        | 0.0057             | Butadienes/C4Acetylenes             | 0.0057   | 0.0083        | 31.89         |
| i-Butene                            | 0.0036             | Butylenes                           | 0.0036   | 0.0089        | 59.89         |
| n-butane                            | 0.0095             | Butanes                             | 0.0095   | 0.0011        | -767.94       |
| 1-Pentyne                           | 0.0987             | C5-Hydrocarbons                     | 0.2530   | 0.2535        | 0.19          |
| 14-Pentadiene                       | 0.1544             | C6 Non-Aromatics                    | 0.0783   | 0.0783        | -0.02         |
| cis3-Hexene                         | 0.0783             | C7 Non-Aromatics                    | 0.0321   | 0.0322        | 0.16          |
| n-Heptane                           | 0.0321             | C8 Non-Aromatics                    | 0.0126   | 0.0126        | -0.29         |
| n-Octane                            | 0.0126             | Benzene                             | 0.2892   | 0.2892        | 0.00          |
| Benzene                             | 0.2892             | Toluene                             | 0.1970   | 0.1968        | -0.08         |
| Toluene                             | 0.1970             | Xylenes/Ethylbenzene                | 0.0393   | 0.0392        | -0.14         |
| p-Xylene                            | 0.0393             | Styrene                             | 0.0235   | 0.0234        | -0.26         |
| E-Benzene                           | 0.0000             | C9-205°C                            | 0.0548   | 0.0551        | 0.49          |
| Styrene                             | 0.0235             | 205-288°C PGO                       | 0.0014   | 0.0014        | -1.14         |
| E-Norbornene                        | 0.0539             |                                     |          |               |               |
| n-Decane                            | 0.0009             |                                     |          |               |               |
| n-C <sub>11</sub>                   | 0.0000             |                                     |          |               |               |
| n-C <sub>12</sub>                   | 0.0014             |                                     |          |               |               |
| n-C <sub>13</sub>                   | 0.0000             |                                     |          |               |               |
| n-C <sub>14</sub>                   |                    |                                     |          |               |               |
| <b>Operation Condition</b>          |                    | <b>Operation Condition</b>          |          |               |               |
| Temperature (°C)                    | 116.63             | Temperature (°C)                    | 116.63   | 114.40        | -1.95         |
| Pressure (Kg/cm <sup>2</sup> gauge) | 3.56               | Pressure (Kg/cm <sup>2</sup> gauge) | 3.56     | 3.56          | 0.00          |
| Molar Flow (kgmole/h)               | 817.47             | Molar Flow (kgmole/h)               | 817.47   | 817.50        | 0.00          |
| Mass Flow (kg/h)                    | 68552.99           | Mass Flow (kg/h)                    | 68552.99 | 68543.00      | -0.01         |
| Molecular Weight                    | 83.8604            | Molecular Weight                    | 83.8604  | 83.85         | -0.01         |
| Total                               | 1.0000             | Total                               | 1.0000   | 1.0000        |               |
| <b>Variable</b>                     | <b>Integration</b> | <b>4613</b>                         |          | <b>Design</b> | <b>%Error</b> |
| <b>Component (%mol)</b>             |                    | <b>Component (%mol)</b>             |          |               |               |
| Hydrogen                            | 0.0000             | Hydrogen                            | 0.0000   | 0.0000        |               |
| Methane                             | 0.0000             | Methane                             | 0.0000   | 0.0000        |               |
| Acetylene                           | 0.0000             | Acetylene                           | 0.0000   | 0.0000        |               |
| Ethylene                            | 0.0000             | Ethylene                            | 0.0000   | 0.0000        |               |
| Ethane                              | 0.0000             | Ethane                              | 0.0000   | 0.0000        |               |
| Propadiene                          | 0.0062             | Propadiene/Methylacetylene          | 0.0062   | 0.0062        | 0.67          |
| Propene                             | 0.0002             | Propylene                           | 0.0002   | 0.0001        | -71.06        |



# Simulation Report – ECC 860 KTA

## Working Stage 6

|                                     |                    |                                     |          |               |               |
|-------------------------------------|--------------------|-------------------------------------|----------|---------------|---------------|
| Propane                             | 0.0000             | Propane                             | 0.0000   | 0.0001        |               |
| 13-Butadiene                        | 0.3473             | Butadienes/C4Acetylenes             | 0.3473   | 0.3442        | -0.90         |
| i-Butene                            | 0.4831             | Butylenes                           | 0.4831   | 0.4767        | -1.33         |
| n-butane                            | 0.1609             | Butanes                             | 0.1609   | 0.1708        | 5.79          |
| 1-Pentyne                           | 0.0000             | C5-Hydrocarbons                     | 0.0024   | 0.0020        | -21.33        |
| 14-Pentadiene                       | 0.0024             | C6 Non-Aromatics                    | 0.0000   | 0.0000        | 0.00          |
| cis3-Hexene                         | 0.0000             | C7 Non-Aromatics                    | 0.0000   | 0.0000        | 0.00          |
| n-Heptane                           | 0.0000             | C8 Non-Aromatics                    | 0.0000   | 0.0000        | 0.00          |
| n-Octane                            | 0.0000             | Benzene                             | 0.0000   | 0.0000        | 0.00          |
| Benzene                             | 0.0000             | Toluene                             | 0.0000   | 0.0000        | 0.00          |
| Toluene                             | 0.0000             | Xylenes/Ethylbenzene                | 0.0000   | 0.0000        |               |
| p-Xylene                            | 0.0000             | Styrene                             | 0.0000   | 0.0000        |               |
| E-Benzene                           | 0.0000             | C9-205°C                            | 0.0000   | 0.0000        |               |
| Styrene                             | 0.0000             | 205-288°C PGO                       | 0.0000   | 0.0000        |               |
| E-Norbornene                        | 0.0000             |                                     |          |               |               |
| n-Decane                            | 0.0000             |                                     |          |               |               |
| n-C <sub>11</sub>                   | 0.0000             |                                     |          |               |               |
| n-C <sub>12</sub>                   | 0.0000             |                                     |          |               |               |
| n-C <sub>13</sub>                   | 0.0000             |                                     |          |               |               |
| n-C <sub>14</sub>                   | 0.0000             |                                     |          |               |               |
| <b>Operation Condition</b>          |                    | <b>Operation Condition</b>          |          |               |               |
| Temperature (°C)                    | 39.57              | Temperature (°C)                    | 39.57    | 39.80         | 0.58          |
| Pressure (Kg/cm <sup>2</sup> gauge) | 6.40               | Pressure (Kg/cm <sup>2</sup> gauge) | 6.40     | 6.40          | 0.00          |
| Molar Flow (kgmole/h)               | 538.99             | Molar Flow (kgmole/h)               | 538.99   | 539.00        | 0.00          |
| Mass Flow (kg/h)                    | 30000.01           | Mass Flow (kg/h)                    | 30000.01 | 30000.00      | 0.00          |
| Molecular Weight                    | 55.6600            | Molecular Weight                    | 55.6600  | 55.66         | 0.00          |
| Total                               | 1.0000             | Total                               | 1.0000   | 1.0001        |               |
| <b>Variable</b>                     | <b>Integration</b> | <b>3040</b>                         |          | <b>Design</b> | <b>%Error</b> |
| <b>Component (%mol)</b>             |                    | <b>Component (%mol)</b>             |          |               |               |
| Hydrogen                            | 0.0000             | Hydrogen                            | 0.0000   | 0.0000        |               |
| Methane                             | 0.0000             | Methane                             | 0.0000   | 0.0000        |               |
| Acetylene                           | 0.0000             | Acetylene                           | 0.0000   | 0.0000        |               |
| Ethylene                            | 0.0000             | Ethylene                            | 0.0000   | 0.0000        |               |
| Ethane                              | 0.0000             | Ethane                              | 0.0000   | 0.0000        |               |
| Propadiene                          | 0.0000             | Propadiene/Methylacetylene          | 0.0000   | 0.0000        |               |
| Propene                             | 0.0000             | Propylene                           | 0.0000   | 0.0000        |               |
| Propane                             | 0.0000             | Propane                             | 0.0000   | 0.0000        |               |
| 13-Butadiene                        | 0.0018             | Butadienes/C4Acetylenes             | 0.0018   | 0.0018        | 0.01          |
| i-Butene                            | 0.0001             | Butylenes                           | 0.0001   | 0.0001        | 0.01          |
| n-butane                            | 0.0000             | Butanes                             | 0.0000   | 0.0000        |               |
| 1-Pentyne                           | 0.0169             | C5-Hydrocarbons                     | 0.0169   | 0.0169        | 0.01          |

# Simulation Report – ECC 860 KTA

## Working Stage 6

|                                     |                    |                                     |          |               |               |
|-------------------------------------|--------------------|-------------------------------------|----------|---------------|---------------|
| 14-Pentadiene                       | 0.0000             | C6 Non-Aromatics                    | 0.0216   | 0.0216        | 0.01          |
| cis3-Hexene                         | 0.0216             | C7 Non-Aromatics                    | 0.0316   | 0.0316        | 0.01          |
| n-Heptane                           | 0.0316             | C8 Non-Aromatics                    | 0.0273   | 0.0273        | 0.01          |
| n-Octane                            | 0.0273             | Benzene                             | 0.2187   | 0.2187        | 0.01          |
| Benzene                             | 0.2187             | Toluene                             | 0.3830   | 0.3830        | 0.01          |
| Toluene                             | 0.3830             | Xylenes/Ethylbenzene                | 0.0972   | 0.0972        | 0.01          |
| p-Xylene                            | 0.0972             | Styrene                             | 0.0589   | 0.0589        | 0.01          |
| E-Benzene                           | 0.0000             | C9-205°C                            | 0.1394   | 0.1394        | 0.01          |
| Styrene                             | 0.0589             | 205-288°C PGO                       | 0.0036   | 0.0036        | 0.01          |
| E-Norbornene                        | 0.1371             |                                     |          |               |               |
| n-Decane                            | 0.0023             |                                     |          |               |               |
| n-C <sub>11</sub>                   | 0.0000             |                                     |          |               |               |
| n-C <sub>12</sub>                   | 0.0036             |                                     |          |               |               |
| n-C <sub>13</sub>                   | 0.0000             |                                     |          |               |               |
| n-C <sub>14</sub>                   | 0.0000             |                                     |          |               |               |
| <b>Operation Condition</b>          |                    | <b>Operation Condition</b>          |          |               |               |
| Temperature (°C)                    | 119.90             | Temperature (°C)                    | 119.90   | 63.80         | -87.93        |
| Pressure (Kg/cm <sup>2</sup> gauge) | 3.56               | Pressure (Kg/cm <sup>2</sup> gauge) | 3.56     | 4.48          | 20.54         |
| Molar Flow (kgmole/h)               | 321.57             | Molar Flow (kgmole/h)               | 321.57   | 1193.92       | 73.07         |
| Mass Flow (kg/h)                    | 30829.00           | Mass Flow (kg/h)                    | 30829.00 | 76576.00      | 59.74         |
| Molecular Weight                    | 95.8695            | Molecular Weight                    | 95.8695  | 64.14         | -49.47        |
| Total                               | 1.0000             | Total                               | 1.0000   | 1.0001        |               |
| <b>Variable</b>                     | <b>Integration</b> | <b>4612</b>                         |          | <b>Design</b> | <b>%Error</b> |
| <b>Component (%mol)</b>             |                    | <b>Component (%mol)</b>             |          |               |               |
| Hydrogen                            | 0.0000             | Hydrogen                            | 0.0000   | 0.0000        |               |
| Methane                             | 0.0000             | Methane                             | 0.0000   | 0.0000        |               |
| Acetylene                           | 0.0000             | Acetylene                           | 0.0000   | 0.0000        |               |
| Ethylene                            | 0.0000             | Ethylene                            | 0.0000   | 0.0000        |               |
| Ethane                              | 0.0000             | Ethane                              | 0.0000   | 0.0000        |               |
| Propadiene                          | 0.0000             | Propadiene/Methylacetylene          | 0.0000   | 0.0000        |               |
| Propene                             | 0.0000             | Propylene                           | 0.0000   | 0.0000        |               |
| Propane                             | 0.0000             | Propane                             | 0.0000   | 0.0000        |               |
| 13-Butadiene                        | 0.0057             | Butadienes/C4Acetylenes             | 0.0057   | 0.0083        | 31.89         |
| i-Butene                            | 0.0036             | Butylenes                           | 0.0036   | 0.0089        | 59.89         |
| n-butane                            | 0.0095             | Butanes                             | 0.0095   | 0.0011        | -767.94       |
| 1-Pentyne                           | 0.0987             | C5-Hydrocarbons                     | 0.2530   | 0.2535        | 0.19          |
| 14-Pentadiene                       | 0.1544             | C6 Non-Aromatics                    | 0.0783   | 0.0783        | -0.02         |
| cis3-Hexene                         | 0.0783             | C7 Non-Aromatics                    | 0.0321   | 0.0322        | 0.16          |
| n-Heptane                           | 0.0321             | C8 Non-Aromatics                    | 0.0126   | 0.0126        | -0.29         |
| n-Octane                            | 0.0126             | Benzene                             | 0.2892   | 0.2892        | 0.00          |
| Benzene                             | 0.2892             | Toluene                             | 0.1970   | 0.1968        | -0.08         |

# Simulation Report – ECC 860 KTA

## Working Stage 6

|                                     |                    |                                     |          |               |               |
|-------------------------------------|--------------------|-------------------------------------|----------|---------------|---------------|
| Toluene                             | 0.1970             | Xylenes/Ethylbenzene                | 0.0393   | 0.0392        | -0.14         |
| p-Xylene                            | 0.0393             | Styrene                             | 0.0235   | 0.0234        | -0.26         |
| E-Benzene                           | 0.0000             | C9-205°C                            | 0.0548   | 0.0551        | 0.49          |
| Styrene                             | 0.0235             | 205-288°C PGO                       | 0.0014   | 0.0014        | -1.14         |
| E-Norbornene                        | 0.0539             |                                     |          |               |               |
| n-Decane                            | 0.0009             |                                     |          |               |               |
| n-C <sub>11</sub>                   | 0.0000             |                                     |          |               |               |
| n-C <sub>12</sub>                   | 0.0014             |                                     |          |               |               |
| n-C <sub>13</sub>                   | 0.0000             |                                     |          |               |               |
| n-C <sub>14</sub>                   | 0.0000             |                                     |          |               |               |
| <b>Operation Condition</b>          |                    | <b>Operation Condition</b>          |          |               |               |
| Temperature (°C)                    | 40.00              | Temperature (°C)                    | 40.00    | 40.00         | 0.00          |
| Pressure (Kg/cm <sup>2</sup> gauge) | 3.00               | Pressure (Kg/cm <sup>2</sup> gauge) | 3.00     | 3.00          | 0.00          |
| Molar Flow (kgmole/h)               | 817.47             | Molar Flow (kgmole/h)               | 817.47   | 817.50        | 0.00          |
| Mass Flow (kg/h)                    | 68552.99           | Mass Flow (kg/h)                    | 68552.99 | 68543.00      | -0.01         |
| Molecular Weight                    | 83.8604            | Molecular Weight                    | 83.8604  | 83.85         | -0.01         |
| Total                               | 1.0000             | Total                               | 1.0000   | 1.0000        |               |
| <b>Variable</b>                     | <b>Integration</b> | <b>4609</b>                         |          | <b>Design</b> | <b>%Error</b> |
| <b>Component (%mol)</b>             |                    | <b>Component (%mol)</b>             |          |               |               |
| Hydrogen                            | 0.0000             | Hydrogen                            | 0.0000   | 0.0000        |               |
| Methane                             | 0.0000             | Methane                             | 0.0000   | 0.0000        |               |
| Acetylene                           | 0.0000             | Acetylene                           | 0.0000   | 0.0000        |               |
| Ethylene                            | 0.0000             | Ethylene                            | 0.0000   | 0.0000        |               |
| Ethane                              | 0.0000             | Ethane                              | 0.0000   | 0.0000        |               |
| Propadiene                          | 0.0000             | Propadiene/Methylacetylene          | 0.0000   | 0.0000        |               |
| Propene                             | 0.0000             | Propylene                           | 0.0000   | 0.0000        |               |
| Propane                             | 0.0000             | Propane                             | 0.0000   | 0.0000        |               |
| 13-Butadiene                        | 0.0082             | Butadienes/C4Acetylenes             | 0.0082   | 0.0124        | 34.26         |
| i-Butene                            | 0.0058             | Butylenes                           | 0.0058   | 0.0146        | 60.14         |
| n-butane                            | 0.0157             | Butanes                             | 0.0157   | 0.0017        | -825.80       |
| 1-Pentyne                           | 0.1517             | C5-Hydrocarbons                     | 0.4061   | 0.4067        | 0.14          |
| 14-Pentadiene                       | 0.2544             | C6 Non-Aromatics                    | 0.1151   | 0.1151        | 0.00          |
| cis3-Hexene                         | 0.1151             | C7 Non-Aromatics                    | 0.0325   | 0.0325        | -0.02         |
| n-Heptane                           | 0.0325             | C8 Non-Aromatics                    | 0.0031   | 0.0032        | 2.18          |
| n-Octane                            | 0.0031             | Benzene                             | 0.3349   | 0.3350        | 0.02          |
| Benzene                             | 0.3349             | Toluene                             | 0.0763   | 0.0763        | -0.04         |
| Toluene                             | 0.0763             | Xylenes/Ethylbenzene                | 0.0017   | 0.0018        | 6.36          |
| p-Xylene                            | 0.0017             | Styrene                             | 0.0005   | 0.0005        | 3.68          |
| E-Benzene                           | 0.0000             | C9-205°C                            | 0.0000   | 0.0001        | 100.00        |
| Styrene                             | 0.0005             | 205-288°C PGO                       | 0.0000   | 0.0000        |               |
| E-Norbornene                        | 0.0000             |                                     |          |               |               |

# Simulation Report – ECC 860 KTA

## Working Stage 6

|                                     |                    |                                     |          |               |               |
|-------------------------------------|--------------------|-------------------------------------|----------|---------------|---------------|
| n-Decane                            | 0.0000             |                                     |          |               |               |
| n-C <sub>11</sub>                   | 0.0000             |                                     |          |               |               |
| n-C <sub>12</sub>                   | 0.0000             |                                     |          |               |               |
| n-C <sub>13</sub>                   | 0.0000             |                                     |          |               |               |
| n-C <sub>14</sub>                   | 0.0000             |                                     |          |               |               |
| <b>Operation Condition</b>          |                    | <b>Operation Condition</b>          |          |               |               |
| Temperature (°C)                    | 113.94             | Temperature (°C)                    | 113.94   | 113.90        | -0.03         |
| Pressure (Kg/cm <sup>2</sup> gauge) | 4.58               | Pressure (Kg/cm <sup>2</sup> gauge) | 4.58     | 4.58          | 0.00          |
| Molar Flow (kgmole/h)               | 495.89             | Molar Flow (kgmole/h)               | 495.89   | 495.80        | -0.02         |
| Mass Flow (kg/h)                    | 37723.99           | Mass Flow (kg/h)                    | 37723.99 | 37724.00      | 0.00          |
| Molecular Weight                    | 76.0729            | Molecular Weight                    | 76.0729  | 76.09         | 0.02          |
| Total                               | 1.0000             | Total                               | 1.0000   | 0.9999        |               |
| <b>Variable</b>                     | <b>Integration</b> | <b>4606</b>                         |          | <b>Design</b> | <b>%Error</b> |
| <b>Component (%mol)</b>             |                    | <b>Component (%mol)</b>             |          |               |               |
| Hydrogen                            | 0.0000             | Hydrogen                            | 0.0000   | 0.0000        |               |
| Methane                             | 0.0000             | Methane                             | 0.0000   | 0.0000        |               |
| Acetylene                           | 0.0000             | Acetylene                           | 0.0000   | 0.0000        |               |
| Ethylene                            | 0.0000             | Ethylene                            | 0.0000   | 0.0000        |               |
| Ethane                              | 0.0000             | Ethane                              | 0.0000   | 0.0000        |               |
| Propadiene                          | 0.0062             | Propadiene/Methylacetylene          | 0.0062   | 0.0062        | 0.67          |
| Propene                             | 0.0002             | Propylene                           | 0.0002   | 0.0001        | -71.06        |
| Propane                             | 0.0000             | Propane                             | 0.0000   | 0.0001        |               |
| 13-Butadiene                        | 0.3473             | Butadienes/C4Acetylenes             | 0.3473   | 0.3442        | -0.90         |
| i-Butene                            | 0.4831             | Butylenes                           | 0.4831   | 0.4767        | -1.33         |
| n-butane                            | 0.1609             | Butanes                             | 0.1609   | 0.1708        | 5.79          |
| 1-Pentyne                           | 0.0000             | C5-Hydrocarbons                     | 0.0024   | 0.0020        | -21.33        |
| 14-Pentadiene                       | 0.0024             | C6 Non-Aromatics                    | 0.0000   | 0.0000        | 0.00          |
| cis3-Hexene                         | 0.0000             | C7 Non-Aromatics                    | 0.0000   | 0.0000        | 0.00          |
| n-Heptane                           | 0.0000             | C8 Non-Aromatics                    | 0.0000   | 0.0000        | 0.00          |
| n-Octane                            | 0.0000             | Benzene                             | 0.0000   | 0.0000        | 0.00          |
| Benzene                             | 0.0000             | Toluene                             | 0.0000   | 0.0000        | 0.00          |
| Toluene                             | 0.0000             | Xylenes/Ethylbenzene                | 0.0000   | 0.0000        | 0.00          |
| p-Xylene                            | 0.0000             | Styrene                             | 0.0000   | 0.0000        |               |
| E-Benzene                           | 0.0000             | C9-205°C                            | 0.0000   | 0.0000        |               |
| Styrene                             | 0.0000             | 205-288°C PGO                       | 0.0000   | 0.0000        |               |
| E-Norbornene                        | 0.0000             |                                     |          |               |               |
| n-Decane                            | 0.0000             |                                     |          |               |               |
| n-C <sub>11</sub>                   | 0.0000             |                                     |          |               |               |
| n-C <sub>12</sub>                   | 0.0000             |                                     |          |               |               |
| n-C <sub>13</sub>                   | 0.0000             |                                     |          |               |               |

**Simulation Report – ECC 860 KTA**  
**Working Stage 6**

|                                     |         |                                     |         |         |       |
|-------------------------------------|---------|-------------------------------------|---------|---------|-------|
| n-C <sub>14</sub>                   | 0.0000  |                                     |         |         |       |
| <b>Operation Condition</b>          |         | <b>Operation Condition</b>          |         |         |       |
| Temperature (°C)                    | 39.58   | Temperature (°C)                    | 39.58   | 39.80   | 0.56  |
| Pressure (Kg/cm <sup>2</sup> gauge) | 5.50    | Pressure (Kg/cm <sup>2</sup> gauge) | 5.50    | 5.50    | 0.00  |
| Molar Flow (kgmole/h)               | 159.04  | Molar Flow (kgmole/h)               | 159.04  | 159.00  | -0.02 |
| Mass Flow (kg/h)                    | 8852.00 | Mass Flow (kg/h)                    | 8852.00 | 8852.00 | 0.00  |
| Molecular Weight                    | 55.6600 | Molecular Weight                    | 55.6600 | 55.66   | 0.00  |
| Total                               | 1.0000  | Total                               | 1.0000  | 1.0001  |       |

**Table A.4.3. Propylene Refrigeration Stream Compositions**

| Variable                            | Simulation | 5001                                |           | Design    | %Error |
|-------------------------------------|------------|-------------------------------------|-----------|-----------|--------|
| <b>Component (%mol)</b>             |            | <b>Component (%mol)</b>             |           |           |        |
| Propene                             | 1.0000     | Propylene                           | 1.0000    | 1.0000    | 0.00   |
| <b>Operation Condition</b>          |            | <b>Operation Condition</b>          |           |           |        |
| Temperature (°C)                    | -39.88     | Temperature (°C)                    | -39.88    | -40.00    | 0.29   |
| Pressure (Kg/cm <sup>2</sup> gauge) | 0.42       | Pressure (Kg/cm <sup>2</sup> gauge) | 0.42      | 0.42      | 0.00   |
| Molar Flow (kgmole/h)               | 6551.72    | Molar Flow (kgmole/h)               | 6666.53   | 6552.50   | -1.74  |
| Mass Flow (kg/h)                    | 275700.14  | Mass Flow (kg/h)                    | 280531.71 | 275738.00 | -1.74  |
| Molecular Weight                    | 42.0806    | Molecular Weight                    | 42.0806   | 42.08     | 0.00   |
| Total                               | 1.0000     | Total                               | 1.0000    | 1.0000    |        |

| Variable                            | Simulation | 5038                                |          | Design   | %Error |
|-------------------------------------|------------|-------------------------------------|----------|----------|--------|
| <b>Component (%mol)</b>             |            | <b>Component (%mol)</b>             |          |          |        |
| Propene                             | 1.0000     | Propylene                           | 1.0000   | 1.0000   | 0.00   |
| <b>Operation Condition</b>          |            | <b>Operation Condition</b>          |          |          |        |
| Temperature (°C)                    | -5.67      | Temperature (°C)                    | -5.67    | -5.80    | 2.30   |
| Pressure (Kg/cm <sup>2</sup> gauge) | 3.97       | Pressure (Kg/cm <sup>2</sup> gauge) | 3.97     | 3.97     | 0.00   |
| Molar Flow (kgmole/h)               | 488.95     | Molar Flow (kgmole/h)               | 488.95   | 489.90   | 0.19   |
| Mass Flow (kg/h)                    | 20575.12   | Mass Flow (kg/h)                    | 20575.12 | 20616.00 | 0.20   |
| Molecular Weight                    | 42.0806    | Molecular Weight                    | 42.0806  | 42.08    | 0.00   |
| Total                               | 1.0000     | Total                               | 1.0000   | 1.0000   |        |

| Variable                            | Simulation | 5040                                |          | Design   | %Error |
|-------------------------------------|------------|-------------------------------------|----------|----------|--------|
| <b>Component (%mol)</b>             |            | <b>Component (%mol)</b>             |          |          |        |
| Propene                             | 1.0000     | Propylene                           | 1.0000   | 1.0000   | 0.00   |
| <b>Operation Condition</b>          |            | <b>Operation Condition</b>          |          |          |        |
| Temperature (°C)                    | -5.80      | Temperature (°C)                    | -5.80    | -5.80    | 0.00   |
| Pressure (Kg/cm <sup>2</sup> gauge) | 3.97       | Pressure (Kg/cm <sup>2</sup> gauge) | 3.97     | 3.97     | 0.00   |
| Molar Flow (kgmole/h)               | 1741.35    | Molar Flow (kgmole/h)               | 1741.35  | 1742.30  | 0.05   |
| Mass Flow (kg/h)                    | 73277.12   | Mass Flow (kg/h)                    | 73277.12 | 73317.00 | 0.05   |

# Simulation Report – ECC 860 KTA

## Working Stage 6

|                  |         |                  |         |        |      |
|------------------|---------|------------------|---------|--------|------|
| Molecular Weight | 42.0806 | Molecular Weight | 42.0806 | 42.08  | 0.00 |
| Total            | 1.0000  | Total            | 1.0000  | 1.0000 |      |

| Variable                            | Simulation | 5046                                |           | Design    | %Error |
|-------------------------------------|------------|-------------------------------------|-----------|-----------|--------|
| Component (%mol)                    |            | Component (%mol)                    |           |           |        |
| Propene                             | 1.0000     | Propylene                           | 1.0000    | 1.0000    | 0.00   |
| Operation Condition                 |            | Operation Condition                 |           |           |        |
| Temperature (°C)                    | -20.62     | Temperature (°C)                    | -20.62    | -25.30    | 18.49  |
| Pressure (Kg/cm <sup>2</sup> gauge) | 3.83       | Pressure (Kg/cm <sup>2</sup> gauge) | 3.83      | 3.83      | 0.00   |
| Molar Flow (kgmole/h)               | 5057.79    | Molar Flow (kgmole/h)               | 5057.79   | 5057.70   | 0.00   |
| Mass Flow (kg/h)                    | 212835.00  | Mass Flow (kg/h)                    | 212835.00 | 212835.00 | 0.00   |
| Molecular Weight                    | 42.0806    | Molecular Weight                    | 42.0806   | 42.08     | 0.00   |
| Total                               | 1.0000     | Total                               | 1.0000    | 1.0000    |        |

| Variable                            | Simulation | 5043                                |          | Design   | %Error |
|-------------------------------------|------------|-------------------------------------|----------|----------|--------|
| Component (%mol)                    |            | Component (%mol)                    |          |          |        |
| Propene                             | 1.0000     | Propylene                           | 1.0000   | 1.0000   | 0.00   |
| Operation Condition                 |            | Operation Condition                 |          |          |        |
| Temperature (°C)                    | -20.62     | Temperature (°C)                    | -20.62   | -25.30   | 18.49  |
| Pressure (Kg/cm <sup>2</sup> gauge) | 3.83       | Pressure (Kg/cm <sup>2</sup> gauge) | 3.83     | 3.83     | 0.00   |
| Molar Flow (kgmole/h)               | 978.33     | Molar Flow (kgmole/h)               | 978.33   | 977.40   | -0.10  |
| Mass Flow (kg/h)                    | 41168.88   | Mass Flow (kg/h)                    | 41168.88 | 41129.00 | -0.10  |
| Molecular Weight                    | 42.0806    | Molecular Weight                    | 42.0806  | 42.08    | 0.00   |
| Total                               | 1.0000     | Total                               | 1.0000   | 1.0000   |        |

| Variable                            | Simulation | 5045                                |          | Design   | %Error |
|-------------------------------------|------------|-------------------------------------|----------|----------|--------|
| Component (%mol)                    |            | Component (%mol)                    |          |          |        |
| Propene                             | 1.0000     | Propylene                           | 1.0000   | 1.0000   | 0.00   |
| Operation Condition                 |            | Operation Condition                 |          |          |        |
| Temperature (°C)                    | -26.75     | Temperature (°C)                    | -26.75   | -26.80   | 0.20   |
| Pressure (Kg/cm <sup>2</sup> gauge) | 1.41       | Pressure (Kg/cm <sup>2</sup> gauge) | 1.41     | 1.41     | 0.00   |
| Molar Flow (kgmole/h)               | 978.33     | Molar Flow (kgmole/h)               | 978.33   | 977.40   | -0.10  |
| Mass Flow (kg/h)                    | 41168.88   | Mass Flow (kg/h)                    | 41168.88 | 41129.00 | -0.10  |
| Molecular Weight                    | 42.0806    | Molecular Weight                    | 42.0806  | 42.08    | 0.00   |
| Total                               | 1.0000     | Total                               | 1.0000   | 1.0000   |        |

| Variable            | Simulation | 5050                |        | Design | %Error |
|---------------------|------------|---------------------|--------|--------|--------|
| Component (%mol)    |            | Component (%mol)    |        |        |        |
| Propene             | 1.0000     | Propylene           | 1.0000 | 1.0000 | 0.00   |
| Operation Condition |            | Operation Condition |        |        |        |
| Temperature (°C)    | -33.50     | Temperature (°C)    | -33.50 | -33.50 | 0.00   |

# Simulation Report – ECC 860 KTA

## Working Stage 6

|                                     |           |                                     |           |           |      |
|-------------------------------------|-----------|-------------------------------------|-----------|-----------|------|
| Pressure (Kg/cm <sup>2</sup> gauge) | 1.27      | Pressure (Kg/cm <sup>2</sup> gauge) | 1.27      | 1.27      | 0.00 |
| Molar Flow (kgmole/h)               | 6551.72   | Molar Flow (kgmole/h)               | 6551.72   | 6552.50   | 0.01 |
| Mass Flow (kg/h)                    | 275700.14 | Mass Flow (kg/h)                    | 275700.14 | 275738.00 | 0.01 |
| Molecular Weight                    | 42.0806   | Molecular Weight                    | 42.0806   | 42.08     | 0.00 |
| Total                               | 1.0000    | Total                               | 1.0000    | 1.0000    |      |

| Variable                            | Simulation | 5060                                |          | Design   | %Error |
|-------------------------------------|------------|-------------------------------------|----------|----------|--------|
| <b>Component (%mol)</b>             |            | <b>Component (%mol)</b>             |          |          |        |
| Propene                             | 1.0000     | Propylene                           | 1.0000   | 1.0000   | 0.00   |
| <b>Operation Condition</b>          |            | <b>Operation Condition</b>          |          |          |        |
| Temperature (°C)                    | -33.50     | Temperature (°C)                    | -33.50   | -33.50   | 0.00   |
| Pressure (Kg/cm <sup>2</sup> gauge) | 1.27       | Pressure (Kg/cm <sup>2</sup> gauge) | 1.27     | 1.27     | 0.00   |
| Molar Flow (kgmole/h)               | 789.96     | Molar Flow (kgmole/h)               | 789.96   | 790.00   | 0.01   |
| Mass Flow (kg/h)                    | 33242.00   | Mass Flow (kg/h)                    | 33242.00 | 33242.00 | 0.00   |
| Molecular Weight                    | 42.0806    | Molecular Weight                    | 42.0806  | 42.08    | 0.00   |
| Total                               | 1.0000     | Total                               | 1.0000   | 1.0000   |        |

| Variable                            | Simulation | 5063                                |           | Design    | %Error |
|-------------------------------------|------------|-------------------------------------|-----------|-----------|--------|
| <b>Component (%mol)</b>             |            | <b>Component (%mol)</b>             |           |           |        |
| Propene                             | 1.0000     | Propylene                           | 1.0000    | 1.0000    | 0.00   |
| <b>Operation Condition</b>          |            | <b>Operation Condition</b>          |           |           |        |
| Temperature (°C)                    | -33.50     | Temperature (°C)                    | -33.50    | -33.50    | 0.00   |
| Pressure (Kg/cm <sup>2</sup> gauge) | 1.27       | Pressure (Kg/cm <sup>2</sup> gauge) | 1.27      | 1.27      | 0.00   |
| Molar Flow (kgmole/h)               | 5740.25    | Molar Flow (kgmole/h)               | 5740.25   | 5741.10   | 0.01   |
| Mass Flow (kg/h)                    | 241553.14  | Mass Flow (kg/h)                    | 241553.14 | 241590.00 | 0.02   |
| Molecular Weight                    | 42.0806    | Molecular Weight                    | 42.0806   | 42.08     | 0.00   |
| Total                               | 1.0000     | Total                               | 1.0000    | 1.0000    |        |

| Variable                            | Simulation | 5090                                |         | Design | %Error |
|-------------------------------------|------------|-------------------------------------|---------|--------|--------|
| <b>Component (%mol)</b>             |            | <b>Component (%mol)</b>             |         |        |        |
| Propene                             | 1.0000     | Propylene                           | 1.0000  | 1.0000 | 0.00   |
| <b>Operation Condition</b>          |            | <b>Operation Condition</b>          |         |        |        |
| Temperature (°C)                    | -33.50     | Temperature (°C)                    | -33.50  | -33.50 | 0.00   |
| Pressure (Kg/cm <sup>2</sup> gauge) | 1.27       | Pressure (Kg/cm <sup>2</sup> gauge) | 1.27    | 1.27   | 0.00   |
| Molar Flow (kgmole/h)               | 21.51      | Molar Flow (kgmole/h)               | 21.51   | 21.50  | -0.03  |
| Mass Flow (kg/h)                    | 905.00     | Mass Flow (kg/h)                    | 905.00  | 905.00 | 0.00   |
| Molecular Weight                    | 42.0806    | Molecular Weight                    | 42.0806 | 42.08  | 0.00   |
| Total                               | 1.0000     | Total                               | 1.0000  | 1.0000 |        |

| Variable                | Simulation | 5002                    |  | Design | %Error |
|-------------------------|------------|-------------------------|--|--------|--------|
| <b>Component (%mol)</b> |            | <b>Component (%mol)</b> |  |        |        |

**Simulation Report – ECC 860 KTA**  
**Working Stage 6**

|                                     |          |                                     |          |          |      |
|-------------------------------------|----------|-------------------------------------|----------|----------|------|
| Propene                             | 1.0000   | Propylene                           | 1.0000   | 1.0000   | 0.00 |
| <b>Operation Condition</b>          |          | <b>Operation Condition</b>          |          |          |      |
| Temperature (°C)                    | -26.75   | Temperature (°C)                    | -26.75   | -26.80   | 0.20 |
| Pressure (Kg/cm <sup>2</sup> gauge) | 1.41     | Pressure (Kg/cm <sup>2</sup> gauge) | 1.41     | 1.41     | 0.00 |
| Molar Flow (kgmole/h)               | 1343.92  | Molar Flow (kgmole/h)               | 1343.92  | 1343.90  | 0.00 |
| Mass Flow (kg/h)                    | 56553.00 | Mass Flow (kg/h)                    | 56553.00 | 56553.00 | 0.00 |
| Molecular Weight                    | 42.0806  | Molecular Weight                    | 42.0806  | 42.08    | 0.00 |
| Total                               | 1.0000   | Total                               | 1.0000   | 1.0000   |      |

| Variable                            | Simulation | 5006                                |           | Design    | %Error |
|-------------------------------------|------------|-------------------------------------|-----------|-----------|--------|
| <b>Component (%mol)</b>             |            | <b>Component (%mol)</b>             |           |           |        |
| Propene                             | 1.0000     | Propylene                           | 1.0000    | 1.0000    | 0.00   |
| <b>Operation Condition</b>          |            | <b>Operation Condition</b>          |           |           |        |
| Temperature (°C)                    | 41.00      | Temperature (°C)                    | 41.00     | 41.00     | 0.00   |
| Pressure (Kg/cm <sup>2</sup> gauge) | 16.84      | Pressure (Kg/cm <sup>2</sup> gauge) | 16.84     | 16.84     | 0.00   |
| Molar Flow (kgmole/h)               | 9365.62    | Molar Flow (kgmole/h)               | 9365.62   | 9365.50   | 0.00   |
| Mass Flow (kg/h)                    | 394111.00  | Mass Flow (kg/h)                    | 394111.00 | 394111.00 | 0.00   |
| Molecular Weight                    | 42.0806    | Molecular Weight                    | 42.0806   | 42.08     | 0.00   |
| Total                               | 1.0000     | Total                               | 1.0000    | 1.0000    |        |

| Variable                            | Simulation | 5009                                |           | Design    | %Error |
|-------------------------------------|------------|-------------------------------------|-----------|-----------|--------|
| <b>Component (%mol)</b>             |            | <b>Component (%mol)</b>             |           |           |        |
| Propene                             | 1.0000     | Propylene                           | 1.0000    | 1.0000    | 0.00   |
| <b>Operation Condition</b>          |            | <b>Operation Condition</b>          |           |           |        |
| Temperature (°C)                    | 34.87      | Temperature (°C)                    | 34.87     | 34.20     | -1.95  |
| Pressure (Kg/cm <sup>2</sup> gauge) | 16.64      | Pressure (Kg/cm <sup>2</sup> gauge) | 16.64     | 16.64     | 0.00   |
| Molar Flow (kgmole/h)               | 2537.68    | Molar Flow (kgmole/h)               | 2537.68   | 2537.70   | 0.00   |
| Mass Flow (kg/h)                    | 106787.00  | Mass Flow (kg/h)                    | 106787.00 | 106787.00 | 0.00   |
| Molecular Weight                    | 42.0806    | Molecular Weight                    | 42.0806   | 42.08     | 0.00   |
| Total                               | 1.0000     | Total                               | 1.0000    | 1.0000    |        |

| Variable                            | Simulation | 5012                                |          | Design   | %Error |
|-------------------------------------|------------|-------------------------------------|----------|----------|--------|
| <b>Component (%mol)</b>             |            | <b>Component (%mol)</b>             |          |          |        |
| Propene                             | 1.0000     | Propylene                           | 1.0000   | 1.0000   | 0.00   |
| <b>Operation Condition</b>          |            | <b>Operation Condition</b>          |          |          |        |
| Temperature (°C)                    | 34.87      | Temperature (°C)                    | 34.87    | 34.20    | -1.95  |
| Pressure (Kg/cm <sup>2</sup> gauge) | 16.64      | Pressure (Kg/cm <sup>2</sup> gauge) | 16.64    | 16.64    | 0.00   |
| Molar Flow (kgmole/h)               | 1703.14    | Molar Flow (kgmole/h)               | 1703.14  | 1703.10  | 0.00   |
| Mass Flow (kg/h)                    | 71669.00   | Mass Flow (kg/h)                    | 71669.00 | 71669.00 | 0.00   |
| Molecular Weight                    | 42.0806    | Molecular Weight                    | 42.0806  | 42.08    | 0.00   |
| Total                               | 1.0000     | Total                               | 1.0000   | 1.0000   |        |



**Simulation Report – ECC 860 KTA**  
**Working Stage 6**

---

| Variable                            | Simulation | 5076                                |         | Design  | %Error |
|-------------------------------------|------------|-------------------------------------|---------|---------|--------|
| Component (%mol)                    |            | Component (%mol)                    |         |         |        |
| Propene                             | 1.0000     | Propylene                           | 1.0000  | 1.0000  | 0.00   |
| Operation Condition                 |            | Operation Condition                 |         |         |        |
| Temperature (°C)                    | 34.87      | Temperature (°C)                    | 34.87   | 34.20   | -1.95  |
| Pressure (Kg/cm <sup>2</sup> gauge) | 16.64      | Pressure (Kg/cm <sup>2</sup> gauge) | 16.64   | 16.64   | 0.00   |
| Molar Flow (kgmole/h)               | 147.53     | Molar Flow (kgmole/h)               | 147.53  | 147.50  | -0.02  |
| Mass Flow (kg/h)                    | 6208.00    | Mass Flow (kg/h)                    | 6208.00 | 6208.00 | 0.00   |
| Molecular Weight                    | 42.0806    | Molecular Weight                    | 42.0806 | 42.08   | 0.00   |
| Total                               | 1.0000     | Total                               | 1.0000  | 1.0000  |        |

| Variable                            | Simulation | 5056                                |          | Design   | %Error |
|-------------------------------------|------------|-------------------------------------|----------|----------|--------|
| Component (%mol)                    |            | Component (%mol)                    |          |          |        |
| Propene                             | 1.0000     | Propylene                           | 1.0000   | 1.0000   | 0.00   |
| Operation Condition                 |            | Operation Condition                 |          |          |        |
| Temperature (°C)                    | 34.87      | Temperature (°C)                    | 34.87    | 34.20    | -1.95  |
| Pressure (Kg/cm <sup>2</sup> gauge) | 16.64      | Pressure (Kg/cm <sup>2</sup> gauge) | 16.64    | 16.64    | 0.00   |
| Molar Flow (kgmole/h)               | 319.20     | Molar Flow (kgmole/h)               | 319.20   | 319.20   | 0.00   |
| Mass Flow (kg/h)                    | 13432.00   | Mass Flow (kg/h)                    | 13432.00 | 13432.00 | 0.00   |
| Molecular Weight                    | 42.0806    | Molecular Weight                    | 42.0806  | 42.08    | 0.00   |
| Total                               | 1.0000     | Total                               | 1.0000   | 1.0000   |        |

| Variable                            | Simulation | 5020                                |          | Design   | %Error |
|-------------------------------------|------------|-------------------------------------|----------|----------|--------|
| Component (%mol)                    |            | Component (%mol)                    |          |          |        |
| Propene                             | 1.0000     | Propylene                           | 1.0000   | 1.0000   | 0.00   |
| Operation Condition                 |            | Operation Condition                 |          |          |        |
| Temperature (°C)                    | 34.87      | Temperature (°C)                    | 34.87    | 34.20    | -1.95  |
| Pressure (Kg/cm <sup>2</sup> gauge) | 16.64      | Pressure (Kg/cm <sup>2</sup> gauge) | 16.64    | 16.64    | 0.00   |
| Molar Flow (kgmole/h)               | 288.11     | Molar Flow (kgmole/h)               | 288.11   | 288.10   | 0.00   |
| Mass Flow (kg/h)                    | 12124.00   | Mass Flow (kg/h)                    | 12124.00 | 12124.00 | 0.00   |
| Molecular Weight                    | 42.0806    | Molecular Weight                    | 42.0806  | 42.08    | 0.00   |
| Total                               | 1.0000     | Total                               | 1.0000   | 1.0000   |        |

| Variable                            | Simulation | 5023                                |        | Design | %Error |
|-------------------------------------|------------|-------------------------------------|--------|--------|--------|
| Component (%mol)                    |            | Component (%mol)                    |        |        |        |
| Propene                             | 1.0000     | Propylene                           | 1.0000 | 1.0000 | 0.00   |
| Operation Condition                 |            | Operation Condition                 |        |        |        |
| Temperature (°C)                    | 34.87      | Temperature (°C)                    | 34.87  | 34.20  | -1.95  |
| Pressure (Kg/cm <sup>2</sup> gauge) | 16.64      | Pressure (Kg/cm <sup>2</sup> gauge) | 16.64  | 16.64  | 0.00   |
| Molar Flow (kgmole/h)               | 79.70      | Molar Flow (kgmole/h)               | 79.70  | 79.70  | -0.01  |

# Simulation Report – ECC 860 KTA

## Working Stage 6

|                  |         |                  |         |         |      |
|------------------|---------|------------------|---------|---------|------|
| Mass Flow (kg/h) | 3354.00 | Mass Flow (kg/h) | 3354.00 | 3354.00 | 0.00 |
| Molecular Weight | 42.0806 | Molecular Weight | 42.0806 | 42.08   | 0.00 |
| Total            | 1.0000  | Total            | 1.0000  | 1.0000  |      |

| Variable                            | Simulation | 5026                                |           | Design    | %Error |
|-------------------------------------|------------|-------------------------------------|-----------|-----------|--------|
| <b>Component (%mol)</b>             |            | <b>Component (%mol)</b>             |           |           |        |
| Propene                             | 1.0000     | Propylene                           | 1.0000    | 1.0000    | 0.00   |
| <b>Operation Condition</b>          |            | <b>Operation Condition</b>          |           |           |        |
| Temperature (°C)                    | 13.34      | Temperature (°C)                    | 13.34     | 13.20     | -1.08  |
| Pressure (Kg/cm <sup>2</sup> gauge) | 7.64       | Pressure (Kg/cm <sup>2</sup> gauge) | 7.64      | 7.64      | 0.00   |
| Molar Flow (kgmole/h)               | 2537.68    | Molar Flow (kgmole/h)               | 2537.68   | 2537.70   | 0.00   |
| Mass Flow (kg/h)                    | 106787.00  | Mass Flow (kg/h)                    | 106787.00 | 106787.00 | 0.00   |
| Molecular Weight                    | 42.0806    | Molecular Weight                    | 42.0806   | 42.08     | 0.00   |
| Total                               | 1.0000     | Total                               | 1.0000    | 1.0000    |        |

| Variable                            | Simulation | 5079                                |         | Design  | %Error |
|-------------------------------------|------------|-------------------------------------|---------|---------|--------|
| <b>Component (%mol)</b>             |            | <b>Component (%mol)</b>             |         |         |        |
| Propene                             | 1.0000     | Propylene                           | 1.0000  | 1.0000  | 0.00   |
| <b>Operation Condition</b>          |            | <b>Operation Condition</b>          |         |         |        |
| Temperature (°C)                    | 3.99       | Temperature (°C)                    | 3.99    | 3.60    | -10.96 |
| Pressure (Kg/cm <sup>2</sup> gauge) | 7.50       | Pressure (Kg/cm <sup>2</sup> gauge) | 7.50    | 7.50    | 0.00   |
| Molar Flow (kgmole/h)               | 48.50      | Molar Flow (kgmole/h)               | 48.50   | 48.50   | 0.00   |
| Mass Flow (kg/h)                    | 2041.00    | Mass Flow (kg/h)                    | 2041.00 | 2041.00 | 0.00   |
| Molecular Weight                    | 42.0806    | Molecular Weight                    | 42.0806 | 42.08   | 0.00   |
| Total                               | 1.0000     | Total                               | 1.0000  | 1.0000  |        |

| Variable                            | Simulation | 5080                                |         | Design  | %Error |
|-------------------------------------|------------|-------------------------------------|---------|---------|--------|
| <b>Component (%mol)</b>             |            | <b>Component (%mol)</b>             |         |         |        |
| Propene                             | 1.0000     | Propylene                           | 1.0000  | 1.0000  | 0.00   |
| <b>Operation Condition</b>          |            | <b>Operation Condition</b>          |         |         |        |
| Temperature (°C)                    | 3.99       | Temperature (°C)                    | 3.99    | 3.60    | -10.96 |
| Pressure (Kg/cm <sup>2</sup> gauge) | 7.50       | Pressure (Kg/cm <sup>2</sup> gauge) | 7.50    | 7.50    | 0.00   |
| Molar Flow (kgmole/h)               | 30.66      | Molar Flow (kgmole/h)               | 30.66   | 30.60   | -0.18  |
| Mass Flow (kg/h)                    | 1290.00    | Mass Flow (kg/h)                    | 1290.00 | 1290.00 | 0.00   |
| Molecular Weight                    | 42.0806    | Molecular Weight                    | 42.0806 | 42.08   | 0.00   |
| Total                               | 1.0000     | Total                               | 1.0000  | 1.0000  |        |

| Variable                   | Simulation | 5085                       |        | Design | %Error |
|----------------------------|------------|----------------------------|--------|--------|--------|
| <b>Component (%mol)</b>    |            | <b>Component (%mol)</b>    |        |        |        |
| Propene                    | 1.0000     | Propylene                  | 1.0000 | 1.0000 | 0.00   |
| <b>Operation Condition</b> |            | <b>Operation Condition</b> |        |        |        |

# Simulation Report – ECC 860 KTA

## Working Stage 6

|                                     |         |                                     |         |        |        |
|-------------------------------------|---------|-------------------------------------|---------|--------|--------|
| Temperature (°C)                    | 3.99    | Temperature (°C)                    | 3.99    | 3.60   | -10.96 |
| Pressure (Kg/cm <sup>2</sup> gauge) | 7.50    | Pressure (Kg/cm <sup>2</sup> gauge) | 7.50    | 7.50   | 0.00   |
| Molar Flow (kgmole/h)               | 17.85   | Molar Flow (kgmole/h)               | 17.85   | 17.90  | 0.30   |
| Mass Flow (kg/h)                    | 751.00  | Mass Flow (kg/h)                    | 751.00  | 751.00 | 0.00   |
| Molecular Weight                    | 42.0806 | Molecular Weight                    | 42.0806 | 42.08  | 0.00   |
| Total                               | 1.0000  | Total                               | 1.0000  | 1.0000 |        |

| Variable                            | Simulation | 5033                                |          | Design   | %Error |
|-------------------------------------|------------|-------------------------------------|----------|----------|--------|
| <b>Component (%mol)</b>             |            | <b>Component (%mol)</b>             |          |          |        |
| Propene                             | 1.0000     | Propylene                           | 1.0000   | 1.0000   | 0.00   |
| <b>Operation Condition</b>          |            | <b>Operation Condition</b>          |          |          |        |
| Temperature (°C)                    | 13.34      | Temperature (°C)                    | 13.34    | 13.20    | -1.06  |
| Pressure (Kg/cm <sup>2</sup> gauge) | 7.64       | Pressure (Kg/cm <sup>2</sup> gauge) | 7.64     | 7.64     | 0.00   |
| Molar Flow (kgmole/h)               | 884.04     | Molar Flow (kgmole/h)               | 884.04   | 883.90   | -0.02  |
| Mass Flow (kg/h)                    | 37200.98   | Mass Flow (kg/h)                    | 37200.98 | 37197.00 | -0.01  |
| Molecular Weight                    | 42.0806    | Molecular Weight                    | 42.0806  | 42.08    | 0.00   |
| Total                               | 1.0000     | Total                               | 1.0000   | 1.0000   |        |

| Variable                            | Simulation | 5001                                |           | Design    | %Error |
|-------------------------------------|------------|-------------------------------------|-----------|-----------|--------|
| <b>Component (%mol)</b>             |            | <b>Component (%mol)</b>             |           |           |        |
| Propene                             | 1.0000     | Propylene                           | 1.0000    | 1.0000    | 0.00   |
| <b>Operation Condition</b>          |            | <b>Operation Condition</b>          |           |           |        |
| Temperature (°C)                    | -39.88     | Temperature (°C)                    | -39.88    | -40.00    | 0.29   |
| Pressure (Kg/cm <sup>2</sup> gauge) | 0.42       | Pressure (Kg/cm <sup>2</sup> gauge) | 0.42      | 0.42      | 0.00   |
| Molar Flow (kgmole/h)               | 6551.72    | Molar Flow (kgmole/h)               | 6666.53   | 6552.50   | -1.74  |
| Mass Flow (kg/h)                    | 275700.14  | Mass Flow (kg/h)                    | 280531.71 | 275738.00 | -1.74  |
| Molecular Weight                    | 42.0806    | Molecular Weight                    | 42.0806   | 42.08     | 0.00   |
| Total                               | 1.0000     | Total                               | 1.0000    | 1.0000    |        |

| Variable                            | Simulation | 5038                                |          | Design   | %Error |
|-------------------------------------|------------|-------------------------------------|----------|----------|--------|
| <b>Component (%mol)</b>             |            | <b>Component (%mol)</b>             |          |          |        |
| Propene                             | 1.0000     | Propylene                           | 1.0000   | 1.0000   | 0.00   |
| <b>Operation Condition</b>          |            | <b>Operation Condition</b>          |          |          |        |
| Temperature (°C)                    | -5.67      | Temperature (°C)                    | -5.67    | -5.80    | 2.30   |
| Pressure (Kg/cm <sup>2</sup> gauge) | 3.97       | Pressure (Kg/cm <sup>2</sup> gauge) | 3.97     | 3.97     | 0.00   |
| Molar Flow (kgmole/h)               | 488.95     | Molar Flow (kgmole/h)               | 488.95   | 489.90   | 0.19   |
| Mass Flow (kg/h)                    | 20575.12   | Mass Flow (kg/h)                    | 20575.12 | 20616.00 | 0.20   |
| Molecular Weight                    | 42.0806    | Molecular Weight                    | 42.0806  | 42.08    | 0.00   |
| Total                               | 1.0000     | Total                               | 1.0000   | 1.0000   |        |

# Simulation Report – ECC 860 KTA

## Working Stage 6

| Variable                            | Simulation | 5040                                |          | Design   | %Error |
|-------------------------------------|------------|-------------------------------------|----------|----------|--------|
| Component (%mol)                    |            | Component (%mol)                    |          |          |        |
| Propene                             | 1.0000     | Propylene                           | 1.0000   | 1.0000   | 0.00   |
| Operation Condition                 |            | Operation Condition                 |          |          |        |
| Temperature (°C)                    | -5.80      | Temperature (°C)                    | -5.80    | -5.80    | 0.00   |
| Pressure (Kg/cm <sup>2</sup> gauge) | 3.97       | Pressure (Kg/cm <sup>2</sup> gauge) | 3.97     | 3.97     | 0.00   |
| Molar Flow (kgmole/h)               | 1741.35    | Molar Flow (kgmole/h)               | 1741.35  | 1742.30  | 0.05   |
| Mass Flow (kg/h)                    | 73277.12   | Mass Flow (kg/h)                    | 73277.12 | 73317.00 | 0.05   |
| Molecular Weight                    | 42.0806    | Molecular Weight                    | 42.0806  | 42.08    | 0.00   |
| Total                               | 1.0000     | Total                               | 1.0000   | 1.0000   |        |

| Variable                            | Simulation | 5046                                |           | Design    | %Error |
|-------------------------------------|------------|-------------------------------------|-----------|-----------|--------|
| Component (%mol)                    |            | Component (%mol)                    |           |           |        |
| Propene                             | 1.0000     | Propylene                           | 1.0000    | 1.0000    | 0.00   |
| Operation Condition                 |            | Operation Condition                 |           |           |        |
| Temperature (°C)                    | -20.62     | Temperature (°C)                    | -20.62    | -25.30    | 18.49  |
| Pressure (Kg/cm <sup>2</sup> gauge) | 3.83       | Pressure (Kg/cm <sup>2</sup> gauge) | 3.83      | 3.83      | 0.00   |
| Molar Flow (kgmole/h)               | 5057.79    | Molar Flow (kgmole/h)               | 5057.79   | 5057.70   | 0.00   |
| Mass Flow (kg/h)                    | 212835.00  | Mass Flow (kg/h)                    | 212835.00 | 212835.00 | 0.00   |
| Molecular Weight                    | 42.0806    | Molecular Weight                    | 42.0806   | 42.08     | 0.00   |
| Total                               | 1.0000     | Total                               | 1.0000    | 1.0000    |        |

| Variable                            | Simulation | 5043                                |          | Design   | %Error |
|-------------------------------------|------------|-------------------------------------|----------|----------|--------|
| Component (%mol)                    |            | Component (%mol)                    |          |          |        |
| Propene                             | 1.0000     | Propylene                           | 1.0000   | 1.0000   | 0.00   |
| Operation Condition                 |            | Operation Condition                 |          |          |        |
| Temperature (°C)                    | -20.62     | Temperature (°C)                    | -20.62   | -25.30   | 18.49  |
| Pressure (Kg/cm <sup>2</sup> gauge) | 3.83       | Pressure (Kg/cm <sup>2</sup> gauge) | 3.83     | 3.83     | 0.00   |
| Molar Flow (kgmole/h)               | 978.33     | Molar Flow (kgmole/h)               | 978.33   | 977.40   | -0.10  |
| Mass Flow (kg/h)                    | 41168.88   | Mass Flow (kg/h)                    | 41168.88 | 41129.00 | -0.10  |
| Molecular Weight                    | 42.0806    | Molecular Weight                    | 42.0806  | 42.08    | 0.00   |
| Total                               | 1.0000     | Total                               | 1.0000   | 1.0000   |        |

| Variable                            | Simulation | 5045                                |          | Design   | %Error |
|-------------------------------------|------------|-------------------------------------|----------|----------|--------|
| Component (%mol)                    |            | Component (%mol)                    |          |          |        |
| Propene                             | 1.0000     | Propylene                           | 1.0000   | 1.0000   | 0.00   |
| Operation Condition                 |            | Operation Condition                 |          |          |        |
| Temperature (°C)                    | -26.75     | Temperature (°C)                    | -26.75   | -26.80   | 0.20   |
| Pressure (Kg/cm <sup>2</sup> gauge) | 1.41       | Pressure (Kg/cm <sup>2</sup> gauge) | 1.41     | 1.41     | 0.00   |
| Molar Flow (kgmole/h)               | 978.33     | Molar Flow (kgmole/h)               | 978.33   | 977.40   | -0.10  |
| Mass Flow (kg/h)                    | 41168.88   | Mass Flow (kg/h)                    | 41168.88 | 41129.00 | -0.10  |

**Simulation Report – ECC 860 KTA**  
**Working Stage 6**

|                  |         |                  |         |        |      |
|------------------|---------|------------------|---------|--------|------|
| Molecular Weight | 42.0806 | Molecular Weight | 42.0806 | 42.08  | 0.00 |
| Total            | 1.0000  | Total            | 1.0000  | 1.0000 |      |

| Variable                            | Simulation | 5050                                |           | Design    | %Error |
|-------------------------------------|------------|-------------------------------------|-----------|-----------|--------|
| <b>Component (%mol)</b>             |            | <b>Component (%mol)</b>             |           |           |        |
| Propene                             | 1.0000     | Propylene                           | 1.0000    | 1.0000    | 0.00   |
| <b>Operation Condition</b>          |            | <b>Operation Condition</b>          |           |           |        |
| Temperature (°C)                    | -33.50     | Temperature (°C)                    | -33.50    | -33.50    | 0.00   |
| Pressure (Kg/cm <sup>2</sup> gauge) | 1.27       | Pressure (Kg/cm <sup>2</sup> gauge) | 1.27      | 1.27      | 0.00   |
| Molar Flow (kgmole/h)               | 6551.72    | Molar Flow (kgmole/h)               | 6551.72   | 6552.50   | 0.01   |
| Mass Flow (kg/h)                    | 275700.14  | Mass Flow (kg/h)                    | 275700.14 | 275738.00 | 0.01   |
| Molecular Weight                    | 42.0806    | Molecular Weight                    | 42.0806   | 42.08     | 0.00   |
| Total                               | 1.0000     | Total                               | 1.0000    | 1.0000    |        |

| Variable                            | Simulation | 5060                                |          | Design   | %Error |
|-------------------------------------|------------|-------------------------------------|----------|----------|--------|
| <b>Component (%mol)</b>             |            | <b>Component (%mol)</b>             |          |          |        |
| Propene                             | 1.0000     | Propylene                           | 1.0000   | 1.0000   | 0.00   |
| <b>Operation Condition</b>          |            | <b>Operation Condition</b>          |          |          |        |
| Temperature (°C)                    | -33.50     | Temperature (°C)                    | -33.50   | -33.50   | 0.00   |
| Pressure (Kg/cm <sup>2</sup> gauge) | 1.27       | Pressure (Kg/cm <sup>2</sup> gauge) | 1.27     | 1.27     | 0.00   |
| Molar Flow (kgmole/h)               | 789.96     | Molar Flow (kgmole/h)               | 789.96   | 790.00   | 0.01   |
| Mass Flow (kg/h)                    | 33242.00   | Mass Flow (kg/h)                    | 33242.00 | 33242.00 | 0.00   |
| Molecular Weight                    | 42.0806    | Molecular Weight                    | 42.0806  | 42.08    | 0.00   |
| Total                               | 1.0000     | Total                               | 1.0000   | 1.0000   |        |

| Variable                            | Simulation | 5063                                |           | Design    | %Error |
|-------------------------------------|------------|-------------------------------------|-----------|-----------|--------|
| <b>Component (%mol)</b>             |            | <b>Component (%mol)</b>             |           |           |        |
| Propene                             | 1.0000     | Propylene                           | 1.0000    | 1.0000    | 0.00   |
| <b>Operation Condition</b>          |            | <b>Operation Condition</b>          |           |           |        |
| Temperature (°C)                    | -33.50     | Temperature (°C)                    | -33.50    | -33.50    | 0.00   |
| Pressure (Kg/cm <sup>2</sup> gauge) | 1.27       | Pressure (Kg/cm <sup>2</sup> gauge) | 1.27      | 1.27      | 0.00   |
| Molar Flow (kgmole/h)               | 5740.25    | Molar Flow (kgmole/h)               | 5740.25   | 5741.10   | 0.01   |
| Mass Flow (kg/h)                    | 241553.14  | Mass Flow (kg/h)                    | 241553.14 | 241590.00 | 0.02   |
| Molecular Weight                    | 42.0806    | Molecular Weight                    | 42.0806   | 42.08     | 0.00   |
| Total                               | 1.0000     | Total                               | 1.0000    | 1.0000    |        |

| Variable                   | Simulation | 5090                       |        | Design | %Error |
|----------------------------|------------|----------------------------|--------|--------|--------|
| <b>Component (%mol)</b>    |            | <b>Component (%mol)</b>    |        |        |        |
| Propene                    | 1.0000     | Propylene                  | 1.0000 | 1.0000 | 0.00   |
| <b>Operation Condition</b> |            | <b>Operation Condition</b> |        |        |        |
| Temperature (°C)           | -33.50     | Temperature (°C)           | -33.50 | -33.50 | 0.00   |

# Simulation Report – ECC 860 KTA

## Working Stage 6

|                                     |         |                                     |         |        |       |
|-------------------------------------|---------|-------------------------------------|---------|--------|-------|
| Pressure (Kg/cm <sup>2</sup> gauge) | 1.27    | Pressure (Kg/cm <sup>2</sup> gauge) | 1.27    | 1.27   | 0.00  |
| Molar Flow (kgmole/h)               | 21.51   | Molar Flow (kgmole/h)               | 21.51   | 21.50  | -0.03 |
| Mass Flow (kg/h)                    | 905.00  | Mass Flow (kg/h)                    | 905.00  | 905.00 | 0.00  |
| Molecular Weight                    | 42.0806 | Molecular Weight                    | 42.0806 | 42.08  | 0.00  |
| Total                               | 1.0000  | Total                               | 1.0000  | 1.0000 |       |

| Variable                            | Simulation | 5002                                |          | Design   | %Error |
|-------------------------------------|------------|-------------------------------------|----------|----------|--------|
| <b>Component (%mol)</b>             |            | <b>Component (%mol)</b>             |          |          |        |
| Propene                             | 1.0000     | Propylene                           | 1.0000   | 1.0000   | 0.00   |
| <b>Operation Condition</b>          |            | <b>Operation Condition</b>          |          |          |        |
| Temperature (°C)                    | -26.75     | Temperature (°C)                    | -26.75   | -26.80   | 0.20   |
| Pressure (Kg/cm <sup>2</sup> gauge) | 1.41       | Pressure (Kg/cm <sup>2</sup> gauge) | 1.41     | 1.41     | 0.00   |
| Molar Flow (kgmole/h)               | 1343.92    | Molar Flow (kgmole/h)               | 1343.92  | 1343.90  | 0.00   |
| Mass Flow (kg/h)                    | 56553.00   | Mass Flow (kg/h)                    | 56553.00 | 56553.00 | 0.00   |
| Molecular Weight                    | 42.0806    | Molecular Weight                    | 42.0806  | 42.08    | 0.00   |
| Total                               | 1.0000     | Total                               | 1.0000   | 1.0000   |        |

| Variable                            | Simulation | 5006                                |           | Design    | %Error |
|-------------------------------------|------------|-------------------------------------|-----------|-----------|--------|
| <b>Component (%mol)</b>             |            | <b>Component (%mol)</b>             |           |           |        |
| Propene                             | 1.0000     | Propylene                           | 1.0000    | 1.0000    | 0.00   |
| <b>Operation Condition</b>          |            | <b>Operation Condition</b>          |           |           |        |
| Temperature (°C)                    | 41.00      | Temperature (°C)                    | 41.00     | 41.00     | 0.00   |
| Pressure (Kg/cm <sup>2</sup> gauge) | 16.84      | Pressure (Kg/cm <sup>2</sup> gauge) | 16.84     | 16.84     | 0.00   |
| Molar Flow (kgmole/h)               | 9365.62    | Molar Flow (kgmole/h)               | 9365.62   | 9365.50   | 0.00   |
| Mass Flow (kg/h)                    | 394111.00  | Mass Flow (kg/h)                    | 394111.00 | 394111.00 | 0.00   |
| Molecular Weight                    | 42.0806    | Molecular Weight                    | 42.0806   | 42.08     | 0.00   |
| Total                               | 1.0000     | Total                               | 1.0000    | 1.0000    |        |

| Variable                            | Simulation | 5009                                |           | Design    | %Error |
|-------------------------------------|------------|-------------------------------------|-----------|-----------|--------|
| <b>Component (%mol)</b>             |            | <b>Component (%mol)</b>             |           |           |        |
| Propene                             | 1.0000     | Propylene                           | 1.0000    | 1.0000    | 0.00   |
| <b>Operation Condition</b>          |            | <b>Operation Condition</b>          |           |           |        |
| Temperature (°C)                    | 34.87      | Temperature (°C)                    | 34.87     | 34.20     | -1.95  |
| Pressure (Kg/cm <sup>2</sup> gauge) | 16.64      | Pressure (Kg/cm <sup>2</sup> gauge) | 16.64     | 16.64     | 0.00   |
| Molar Flow (kgmole/h)               | 2537.68    | Molar Flow (kgmole/h)               | 2537.68   | 2537.70   | 0.00   |
| Mass Flow (kg/h)                    | 106787.00  | Mass Flow (kg/h)                    | 106787.00 | 106787.00 | 0.00   |
| Molecular Weight                    | 42.0806    | Molecular Weight                    | 42.0806   | 42.08     | 0.00   |
| Total                               | 1.0000     | Total                               | 1.0000    | 1.0000    |        |

| Variable                | Simulation | 5012                    |  | Design | %Error |
|-------------------------|------------|-------------------------|--|--------|--------|
| <b>Component (%mol)</b> |            | <b>Component (%mol)</b> |  |        |        |

# Simulation Report – ECC 860 KTA

## Working Stage 6

|                                     |          |                                     |          |          |       |
|-------------------------------------|----------|-------------------------------------|----------|----------|-------|
| Propene                             | 1.0000   | Propylene                           | 1.0000   | 1.0000   | 0.00  |
| <b>Operation Condition</b>          |          | <b>Operation Condition</b>          |          |          |       |
| Temperature (°C)                    | 34.87    | Temperature (°C)                    | 34.87    | 34.20    | -1.95 |
| Pressure (Kg/cm <sup>2</sup> gauge) | 16.64    | Pressure (Kg/cm <sup>2</sup> gauge) | 16.64    | 16.64    | 0.00  |
| Molar Flow (kgmole/h)               | 1703.14  | Molar Flow (kgmole/h)               | 1703.14  | 1703.10  | 0.00  |
| Mass Flow (kg/h)                    | 71669.00 | Mass Flow (kg/h)                    | 71669.00 | 71669.00 | 0.00  |
| Molecular Weight                    | 42.0806  | Molecular Weight                    | 42.0806  | 42.08    | 0.00  |
| Total                               | 1.0000   | Total                               | 1.0000   | 1.0000   |       |

| Variable                            | Simulation | 5076                                |         | Design  | %Error |
|-------------------------------------|------------|-------------------------------------|---------|---------|--------|
| <b>Component (%mol)</b>             |            | <b>Component (%mol)</b>             |         |         |        |
| Propene                             | 1.0000     | Propylene                           | 1.0000  | 1.0000  | 0.00   |
| <b>Operation Condition</b>          |            | <b>Operation Condition</b>          |         |         |        |
| Temperature (°C)                    | 34.87      | Temperature (°C)                    | 34.87   | 34.20   | -1.95  |
| Pressure (Kg/cm <sup>2</sup> gauge) | 16.64      | Pressure (Kg/cm <sup>2</sup> gauge) | 16.64   | 16.64   | 0.00   |
| Molar Flow (kgmole/h)               | 147.53     | Molar Flow (kgmole/h)               | 147.53  | 147.50  | -0.02  |
| Mass Flow (kg/h)                    | 6208.00    | Mass Flow (kg/h)                    | 6208.00 | 6208.00 | 0.00   |
| Molecular Weight                    | 42.0806    | Molecular Weight                    | 42.0806 | 42.08   | 0.00   |
| Total                               | 1.0000     | Total                               | 1.0000  | 1.0000  |        |

| Variable                            | Simulation | 5056                                |          | Design   | %Error |
|-------------------------------------|------------|-------------------------------------|----------|----------|--------|
| <b>Component (%mol)</b>             |            | <b>Component (%mol)</b>             |          |          |        |
| Propene                             | 1.0000     | Propylene                           | 1.0000   | 1.0000   | 0.00   |
| <b>Operation Condition</b>          |            | <b>Operation Condition</b>          |          |          |        |
| Temperature (°C)                    | 34.87      | Temperature (°C)                    | 34.87    | 34.20    | -1.95  |
| Pressure (Kg/cm <sup>2</sup> gauge) | 16.64      | Pressure (Kg/cm <sup>2</sup> gauge) | 16.64    | 16.64    | 0.00   |
| Molar Flow (kgmole/h)               | 319.20     | Molar Flow (kgmole/h)               | 319.20   | 319.20   | 0.00   |
| Mass Flow (kg/h)                    | 13432.00   | Mass Flow (kg/h)                    | 13432.00 | 13432.00 | 0.00   |
| Molecular Weight                    | 42.0806    | Molecular Weight                    | 42.0806  | 42.08    | 0.00   |
| Total                               | 1.0000     | Total                               | 1.0000   | 1.0000   |        |

| Variable                            | Simulation | 5020                                |          | Design   | %Error |
|-------------------------------------|------------|-------------------------------------|----------|----------|--------|
| <b>Component (%mol)</b>             |            | <b>Component (%mol)</b>             |          |          |        |
| Propene                             | 1.0000     | Propylene                           | 1.0000   | 1.0000   | 0.00   |
| <b>Operation Condition</b>          |            | <b>Operation Condition</b>          |          |          |        |
| Temperature (°C)                    | 34.87      | Temperature (°C)                    | 34.87    | 34.20    | -1.95  |
| Pressure (Kg/cm <sup>2</sup> gauge) | 16.64      | Pressure (Kg/cm <sup>2</sup> gauge) | 16.64    | 16.64    | 0.00   |
| Molar Flow (kgmole/h)               | 288.11     | Molar Flow (kgmole/h)               | 288.11   | 288.10   | 0.00   |
| Mass Flow (kg/h)                    | 12124.00   | Mass Flow (kg/h)                    | 12124.00 | 12124.00 | 0.00   |
| Molecular Weight                    | 42.0806    | Molecular Weight                    | 42.0806  | 42.08    | 0.00   |
| Total                               | 1.0000     | Total                               | 1.0000   | 1.0000   |        |

**Simulation Report – ECC 860 KTA**  
**Working Stage 6**

---

| Variable                            | Simulation | 5023                                |         | Design  | %Error |
|-------------------------------------|------------|-------------------------------------|---------|---------|--------|
| Component (%mol)                    |            | Component (%mol)                    |         |         |        |
| Propene                             | 1.0000     | Propylene                           | 1.0000  | 1.0000  | 0.00   |
| Operation Condition                 |            | Operation Condition                 |         |         |        |
| Temperature (°C)                    | 34.87      | Temperature (°C)                    | 34.87   | 34.20   | -1.95  |
| Pressure (Kg/cm <sup>2</sup> gauge) | 16.64      | Pressure (Kg/cm <sup>2</sup> gauge) | 16.64   | 16.64   | 0.00   |
| Molar Flow (kgmole/h)               | 79.70      | Molar Flow (kgmole/h)               | 79.70   | 79.70   | -0.01  |
| Mass Flow (kg/h)                    | 3354.00    | Mass Flow (kg/h)                    | 3354.00 | 3354.00 | 0.00   |
| Molecular Weight                    | 42.0806    | Molecular Weight                    | 42.0806 | 42.08   | 0.00   |
| Total                               | 1.0000     | Total                               | 1.0000  | 1.0000  |        |

| Variable                            | Simulation | 5026                                |           | Design    | %Error |
|-------------------------------------|------------|-------------------------------------|-----------|-----------|--------|
| Component (%mol)                    |            | Component (%mol)                    |           |           |        |
| Propene                             | 1.0000     | Propylene                           | 1.0000    | 1.0000    | 0.00   |
| Operation Condition                 |            | Operation Condition                 |           |           |        |
| Temperature (°C)                    | 13.34      | Temperature (°C)                    | 13.34     | 13.20     | -1.08  |
| Pressure (Kg/cm <sup>2</sup> gauge) | 7.64       | Pressure (Kg/cm <sup>2</sup> gauge) | 7.64      | 7.64      | 0.00   |
| Molar Flow (kgmole/h)               | 2537.68    | Molar Flow (kgmole/h)               | 2537.68   | 2537.70   | 0.00   |
| Mass Flow (kg/h)                    | 106787.00  | Mass Flow (kg/h)                    | 106787.00 | 106787.00 | 0.00   |
| Molecular Weight                    | 42.0806    | Molecular Weight                    | 42.0806   | 42.08     | 0.00   |
| Total                               | 1.0000     | Total                               | 1.0000    | 1.0000    |        |

| Variable                            | Simulation | 5079                                |         | Design  | %Error |
|-------------------------------------|------------|-------------------------------------|---------|---------|--------|
| Component (%mol)                    |            | Component (%mol)                    |         |         |        |
| Propene                             | 1.0000     | Propylene                           | 1.0000  | 1.0000  | 0.00   |
| Operation Condition                 |            | Operation Condition                 |         |         |        |
| Temperature (°C)                    | 3.99       | Temperature (°C)                    | 3.99    | 3.60    | -10.96 |
| Pressure (Kg/cm <sup>2</sup> gauge) | 7.50       | Pressure (Kg/cm <sup>2</sup> gauge) | 7.50    | 7.50    | 0.00   |
| Molar Flow (kgmole/h)               | 48.50      | Molar Flow (kgmole/h)               | 48.50   | 48.50   | 0.00   |
| Mass Flow (kg/h)                    | 2041.00    | Mass Flow (kg/h)                    | 2041.00 | 2041.00 | 0.00   |
| Molecular Weight                    | 42.0806    | Molecular Weight                    | 42.0806 | 42.08   | 0.00   |
| Total                               | 1.0000     | Total                               | 1.0000  | 1.0000  |        |

| Variable                            | Simulation | 5080                                |        | Design | %Error |
|-------------------------------------|------------|-------------------------------------|--------|--------|--------|
| Component (%mol)                    |            | Component (%mol)                    |        |        |        |
| Propene                             | 1.0000     | Propylene                           | 1.0000 | 1.0000 | 0.00   |
| Operation Condition                 |            | Operation Condition                 |        |        |        |
| Temperature (°C)                    | 3.99       | Temperature (°C)                    | 3.99   | 3.60   | -10.96 |
| Pressure (Kg/cm <sup>2</sup> gauge) | 7.50       | Pressure (Kg/cm <sup>2</sup> gauge) | 7.50   | 7.50   | 0.00   |
| Molar Flow (kgmole/h)               | 30.66      | Molar Flow (kgmole/h)               | 30.66  | 30.60  | -0.18  |



**Simulation Report – ECC 860 KTA**  
**Working Stage 6**

---

|                  |         |                  |         |         |      |
|------------------|---------|------------------|---------|---------|------|
| Mass Flow (kg/h) | 1290.00 | Mass Flow (kg/h) | 1290.00 | 1290.00 | 0.00 |
| Molecular Weight | 42.0806 | Molecular Weight | 42.0806 | 42.08   | 0.00 |
| Total            | 1.0000  | Total            | 1.0000  | 1.0000  |      |

| Variable                            | Simulation | 5085                                |         | Design | %Error |
|-------------------------------------|------------|-------------------------------------|---------|--------|--------|
| <b>Component (%mol)</b>             |            | <b>Component (%mol)</b>             |         |        |        |
| Propene                             | 1.0000     | Propylene                           | 1.0000  | 1.0000 | 0.00   |
| <b>Operation Condition</b>          |            | <b>Operation Condition</b>          |         |        |        |
| Temperature (°C)                    | 3.99       | Temperature (°C)                    | 3.99    | 3.60   | -10.96 |
| Pressure (Kg/cm <sup>2</sup> gauge) | 7.50       | Pressure (Kg/cm <sup>2</sup> gauge) | 7.50    | 7.50   | 0.00   |
| Molar Flow (kgmole/h)               | 17.85      | Molar Flow (kgmole/h)               | 17.85   | 17.90  | 0.30   |
| Mass Flow (kg/h)                    | 751.00     | Mass Flow (kg/h)                    | 751.00  | 751.00 | 0.00   |
| Molecular Weight                    | 42.0806    | Molecular Weight                    | 42.0806 | 42.08  | 0.00   |
| Total                               | 1.0000     | Total                               | 1.0000  | 1.0000 |        |

| Variable                            | Simulation | 5034                                |          | Design   | %Error |
|-------------------------------------|------------|-------------------------------------|----------|----------|--------|
| <b>Component (%mol)</b>             |            | <b>Component (%mol)</b>             |          |          |        |
| Propene                             | 1.0000     | Propylene                           | 1.0000   | 1.0000   | 0.00   |
| <b>Operation Condition</b>          |            | <b>Operation Condition</b>          |          |          |        |
| Temperature (°C)                    | 12.70      | Temperature (°C)                    | 12.70    | 12.70    | 0.00   |
| Pressure (Kg/cm <sup>2</sup> gauge) | 7.54       | Pressure (Kg/cm <sup>2</sup> gauge) | 7.54     | 7.54     | 0.00   |
| Molar Flow (kgmole/h)               | 884.04     | Molar Flow (kgmole/h)               | 884.04   | 883.90   | -0.02  |
| Mass Flow (kg/h)                    | 37200.98   | Mass Flow (kg/h)                    | 37200.98 | 37197.00 | -0.01  |
| Molecular Weight                    | 42.0806    | Molecular Weight                    | 42.0806  | 42.08    | 0.00   |
| Total                               | 1.0000     | Total                               | 1.0000   | 1.0000   |        |

| Variable                            | Simulation | 5001                                |           | Design    | %Error |
|-------------------------------------|------------|-------------------------------------|-----------|-----------|--------|
| <b>Component (%mol)</b>             |            | <b>Component (%mol)</b>             |           |           |        |
| Propene                             | 1.0000     | Propylene                           | 1.0000    | 1.0000    | 0.00   |
| <b>Operation Condition</b>          |            | <b>Operation Condition</b>          |           |           |        |
| Temperature (°C)                    | -39.88     | Temperature (°C)                    | -39.88    | -40.00    | 0.29   |
| Pressure (Kg/cm <sup>2</sup> gauge) | 0.42       | Pressure (Kg/cm <sup>2</sup> gauge) | 0.42      | 0.42      | 0.00   |
| Molar Flow (kgmole/h)               | 6551.72    | Molar Flow (kgmole/h)               | 6666.53   | 6552.50   | -1.74  |
| Mass Flow (kg/h)                    | 275700.14  | Mass Flow (kg/h)                    | 280531.71 | 275738.00 | -1.74  |
| Molecular Weight                    | 42.0806    | Molecular Weight                    | 42.0806   | 42.08     | 0.00   |
| Total                               | 1.0000     | Total                               | 1.0000    | 1.0000    |        |

| Variable                | Simulation | 5038                    |        | Design | %Error |
|-------------------------|------------|-------------------------|--------|--------|--------|
| <b>Component (%mol)</b> |            | <b>Component (%mol)</b> |        |        |        |
| Propene                 | 1.0000     | Propylene               | 1.0000 | 1.0000 | 0.00   |

# Simulation Report – ECC 860 KTA

## Working Stage 6

| Operation Condition                 |          | Operation Condition                 |          |          |      |
|-------------------------------------|----------|-------------------------------------|----------|----------|------|
| Temperature (°C)                    | -5.67    | Temperature (°C)                    | -5.67    | -5.80    | 2.30 |
| Pressure (Kg/cm <sup>2</sup> gauge) | 3.97     | Pressure (Kg/cm <sup>2</sup> gauge) | 3.97     | 3.97     | 0.00 |
| Molar Flow (kgmole/h)               | 488.95   | Molar Flow (kgmole/h)               | 488.95   | 489.90   | 0.19 |
| Mass Flow (kg/h)                    | 20575.12 | Mass Flow (kg/h)                    | 20575.12 | 20616.00 | 0.20 |
| Molecular Weight                    | 42.0806  | Molecular Weight                    | 42.0806  | 42.08    | 0.00 |
| Total                               | 1.0000   | Total                               | 1.0000   | 1.0000   |      |

| Variable                            | Simulation | 5040                                |          | Design   | %Error |
|-------------------------------------|------------|-------------------------------------|----------|----------|--------|
| Component (%mol)                    |            | Component (%mol)                    |          |          |        |
| Propene                             | 1.0000     | Propylene                           | 1.0000   | 1.0000   | 0.00   |
| Operation Condition                 |            | Operation Condition                 |          |          |        |
| Temperature (°C)                    | -5.80      | Temperature (°C)                    | -5.80    | -5.80    | 0.00   |
| Pressure (Kg/cm <sup>2</sup> gauge) | 3.97       | Pressure (Kg/cm <sup>2</sup> gauge) | 3.97     | 3.97     | 0.00   |
| Molar Flow (kgmole/h)               | 1741.35    | Molar Flow (kgmole/h)               | 1741.35  | 1742.30  | 0.05   |
| Mass Flow (kg/h)                    | 73277.12   | Mass Flow (kg/h)                    | 73277.12 | 73317.00 | 0.05   |
| Molecular Weight                    | 42.0806    | Molecular Weight                    | 42.0806  | 42.08    | 0.00   |
| Total                               | 1.0000     | Total                               | 1.0000   | 1.0000   |        |

| Variable                            | Simulation | 5046                                |           | Design    | %Error |
|-------------------------------------|------------|-------------------------------------|-----------|-----------|--------|
| Component (%mol)                    |            | Component (%mol)                    |           |           |        |
| Propene                             | 1.0000     | Propylene                           | 1.0000    | 1.0000    | 0.00   |
| Operation Condition                 |            | Operation Condition                 |           |           |        |
| Temperature (°C)                    | -20.62     | Temperature (°C)                    | -20.62    | -25.30    | 18.49  |
| Pressure (Kg/cm <sup>2</sup> gauge) | 3.83       | Pressure (Kg/cm <sup>2</sup> gauge) | 3.83      | 3.83      | 0.00   |
| Molar Flow (kgmole/h)               | 5057.79    | Molar Flow (kgmole/h)               | 5057.79   | 5057.70   | 0.00   |
| Mass Flow (kg/h)                    | 212835.00  | Mass Flow (kg/h)                    | 212835.00 | 212835.00 | 0.00   |
| Molecular Weight                    | 42.0806    | Molecular Weight                    | 42.0806   | 42.08     | 0.00   |
| Total                               | 1.0000     | Total                               | 1.0000    | 1.0000    |        |

| Variable                            | Simulation | 5043                                |          | Design   | %Error |
|-------------------------------------|------------|-------------------------------------|----------|----------|--------|
| Component (%mol)                    |            | Component (%mol)                    |          |          |        |
| Propene                             | 1.0000     | Propylene                           | 1.0000   | 1.0000   | 0.00   |
| Operation Condition                 |            | Operation Condition                 |          |          |        |
| Temperature (°C)                    | -20.62     | Temperature (°C)                    | -20.62   | -25.30   | 18.49  |
| Pressure (Kg/cm <sup>2</sup> gauge) | 3.83       | Pressure (Kg/cm <sup>2</sup> gauge) | 3.83     | 3.83     | 0.00   |
| Molar Flow (kgmole/h)               | 978.33     | Molar Flow (kgmole/h)               | 978.33   | 977.40   | -0.10  |
| Mass Flow (kg/h)                    | 41168.88   | Mass Flow (kg/h)                    | 41168.88 | 41129.00 | -0.10  |
| Molecular Weight                    | 42.0806    | Molecular Weight                    | 42.0806  | 42.08    | 0.00   |
| Total                               | 1.0000     | Total                               | 1.0000   | 1.0000   |        |

**Simulation Report – ECC 860 KTA**  
**Working Stage 6**

---

| Variable                            | Simulation | 5045                                |          | Design   | %Error |
|-------------------------------------|------------|-------------------------------------|----------|----------|--------|
| Component (%mol)                    |            | Component (%mol)                    |          |          |        |
| Propene                             | 1.0000     | Propylene                           | 1.0000   | 1.0000   | 0.00   |
| Operation Condition                 |            | Operation Condition                 |          |          |        |
| Temperature (°C)                    | -26.75     | Temperature (°C)                    | -26.75   | -26.80   | 0.20   |
| Pressure (Kg/cm <sup>2</sup> gauge) | 1.41       | Pressure (Kg/cm <sup>2</sup> gauge) | 1.41     | 1.41     | 0.00   |
| Molar Flow (kgmole/h)               | 978.33     | Molar Flow (kgmole/h)               | 978.33   | 977.40   | -0.10  |
| Mass Flow (kg/h)                    | 41168.88   | Mass Flow (kg/h)                    | 41168.88 | 41129.00 | -0.10  |
| Molecular Weight                    | 42.0806    | Molecular Weight                    | 42.0806  | 42.08    | 0.00   |
| Total                               | 1.0000     | Total                               | 1.0000   | 1.0000   |        |

| Variable                            | Simulation | 5050                                |           | Design    | %Error |
|-------------------------------------|------------|-------------------------------------|-----------|-----------|--------|
| Component (%mol)                    |            | Component (%mol)                    |           |           |        |
| Propene                             | 1.0000     | Propylene                           | 1.0000    | 1.0000    | 0.00   |
| Operation Condition                 |            | Operation Condition                 |           |           |        |
| Temperature (°C)                    | -33.50     | Temperature (°C)                    | -33.50    | -33.50    | 0.00   |
| Pressure (Kg/cm <sup>2</sup> gauge) | 1.27       | Pressure (Kg/cm <sup>2</sup> gauge) | 1.27      | 1.27      | 0.00   |
| Molar Flow (kgmole/h)               | 6551.72    | Molar Flow (kgmole/h)               | 6551.72   | 6552.50   | 0.01   |
| Mass Flow (kg/h)                    | 275700.14  | Mass Flow (kg/h)                    | 275700.14 | 275738.00 | 0.01   |
| Molecular Weight                    | 42.0806    | Molecular Weight                    | 42.0806   | 42.08     | 0.00   |
| Total                               | 1.0000     | Total                               | 1.0000    | 1.0000    |        |

| Variable                            | Simulation | 5060                                |          | Design   | %Error |
|-------------------------------------|------------|-------------------------------------|----------|----------|--------|
| Component (%mol)                    |            | Component (%mol)                    |          |          |        |
| Propene                             | 1.0000     | Propylene                           | 1.0000   | 1.0000   | 0.00   |
| Operation Condition                 |            | Operation Condition                 |          |          |        |
| Temperature (°C)                    | -33.50     | Temperature (°C)                    | -33.50   | -33.50   | 0.00   |
| Pressure (Kg/cm <sup>2</sup> gauge) | 1.27       | Pressure (Kg/cm <sup>2</sup> gauge) | 1.27     | 1.27     | 0.00   |
| Molar Flow (kgmole/h)               | 789.96     | Molar Flow (kgmole/h)               | 789.96   | 790.00   | 0.01   |
| Mass Flow (kg/h)                    | 33242.00   | Mass Flow (kg/h)                    | 33242.00 | 33242.00 | 0.00   |
| Molecular Weight                    | 42.0806    | Molecular Weight                    | 42.0806  | 42.08    | 0.00   |
| Total                               | 1.0000     | Total                               | 1.0000   | 1.0000   |        |

| Variable                            | Simulation | 5063                                |           | Design    | %Error |
|-------------------------------------|------------|-------------------------------------|-----------|-----------|--------|
| Component (%mol)                    |            | Component (%mol)                    |           |           |        |
| Propene                             | 1.0000     | Propylene                           | 1.0000    | 1.0000    | 0.00   |
| Operation Condition                 |            | Operation Condition                 |           |           |        |
| Temperature (°C)                    | -33.50     | Temperature (°C)                    | -33.50    | -33.50    | 0.00   |
| Pressure (Kg/cm <sup>2</sup> gauge) | 1.27       | Pressure (Kg/cm <sup>2</sup> gauge) | 1.27      | 1.27      | 0.00   |
| Molar Flow (kgmole/h)               | 5740.25    | Molar Flow (kgmole/h)               | 5740.25   | 5741.10   | 0.01   |
| Mass Flow (kg/h)                    | 241553.14  | Mass Flow (kg/h)                    | 241553.14 | 241590.00 | 0.02   |

# Simulation Report – ECC 860 KTA

## Working Stage 6

|                  |         |                  |         |        |      |
|------------------|---------|------------------|---------|--------|------|
| Molecular Weight | 42.0806 | Molecular Weight | 42.0806 | 42.08  | 0.00 |
| Total            | 1.0000  | Total            | 1.0000  | 1.0000 |      |

| Variable                            | Simulation | 5090                                |         | Design | %Error |
|-------------------------------------|------------|-------------------------------------|---------|--------|--------|
| <b>Component (%mol)</b>             |            | <b>Component (%mol)</b>             |         |        |        |
| Propene                             | 1.0000     | Propylene                           | 1.0000  | 1.0000 | 0.00   |
| <b>Operation Condition</b>          |            | <b>Operation Condition</b>          |         |        |        |
| Temperature (°C)                    | -33.50     | Temperature (°C)                    | -33.50  | -33.50 | 0.00   |
| Pressure (Kg/cm <sup>2</sup> gauge) | 1.27       | Pressure (Kg/cm <sup>2</sup> gauge) | 1.27    | 1.27   | 0.00   |
| Molar Flow (kgmole/h)               | 21.51      | Molar Flow (kgmole/h)               | 21.51   | 21.50  | -0.03  |
| Mass Flow (kg/h)                    | 905.00     | Mass Flow (kg/h)                    | 905.00  | 905.00 | 0.00   |
| Molecular Weight                    | 42.0806    | Molecular Weight                    | 42.0806 | 42.08  | 0.00   |
| Total                               | 1.0000     | Total                               | 1.0000  | 1.0000 |        |

| Variable                            | Simulation | 5002                                |          | Design   | %Error |
|-------------------------------------|------------|-------------------------------------|----------|----------|--------|
| <b>Component (%mol)</b>             |            | <b>Component (%mol)</b>             |          |          |        |
| Propene                             | 1.0000     | Propylene                           | 1.0000   | 1.0000   | 0.00   |
| <b>Operation Condition</b>          |            | <b>Operation Condition</b>          |          |          |        |
| Temperature (°C)                    | -26.75     | Temperature (°C)                    | -26.75   | -26.80   | 0.20   |
| Pressure (Kg/cm <sup>2</sup> gauge) | 1.41       | Pressure (Kg/cm <sup>2</sup> gauge) | 1.41     | 1.41     | 0.00   |
| Molar Flow (kgmole/h)               | 1343.92    | Molar Flow (kgmole/h)               | 1343.92  | 1343.90  | 0.00   |
| Mass Flow (kg/h)                    | 56553.00   | Mass Flow (kg/h)                    | 56553.00 | 56553.00 | 0.00   |
| Molecular Weight                    | 42.0806    | Molecular Weight                    | 42.0806  | 42.08    | 0.00   |
| Total                               | 1.0000     | Total                               | 1.0000   | 1.0000   |        |

| Variable                            | Simulation | 5006                                |           | Design    | %Error |
|-------------------------------------|------------|-------------------------------------|-----------|-----------|--------|
| <b>Component (%mol)</b>             |            | <b>Component (%mol)</b>             |           |           |        |
| Propene                             | 1.0000     | Propylene                           | 1.0000    | 1.0000    | 0.00   |
| <b>Operation Condition</b>          |            | <b>Operation Condition</b>          |           |           |        |
| Temperature (°C)                    | 41.00      | Temperature (°C)                    | 41.00     | 41.00     | 0.00   |
| Pressure (Kg/cm <sup>2</sup> gauge) | 16.84      | Pressure (Kg/cm <sup>2</sup> gauge) | 16.84     | 16.84     | 0.00   |
| Molar Flow (kgmole/h)               | 9365.62    | Molar Flow (kgmole/h)               | 9365.62   | 9365.50   | 0.00   |
| Mass Flow (kg/h)                    | 394111.00  | Mass Flow (kg/h)                    | 394111.00 | 394111.00 | 0.00   |
| Molecular Weight                    | 42.0806    | Molecular Weight                    | 42.0806   | 42.08     | 0.00   |
| Total                               | 1.0000     | Total                               | 1.0000    | 1.0000    |        |

| Variable                   | Simulation | 5009                       |        | Design | %Error |
|----------------------------|------------|----------------------------|--------|--------|--------|
| <b>Component (%mol)</b>    |            | <b>Component (%mol)</b>    |        |        |        |
| Propene                    | 1.0000     | Propylene                  | 1.0000 | 1.0000 | 0.00   |
| <b>Operation Condition</b> |            | <b>Operation Condition</b> |        |        |        |
| Temperature (°C)           | 34.87      | Temperature (°C)           | 34.87  | 34.20  | -1.95  |

# Simulation Report – ECC 860 KTA

## Working Stage 6

|                                     |           |                                     |           |           |      |
|-------------------------------------|-----------|-------------------------------------|-----------|-----------|------|
| Pressure (Kg/cm <sup>2</sup> gauge) | 16.64     | Pressure (Kg/cm <sup>2</sup> gauge) | 16.64     | 16.64     | 0.00 |
| Molar Flow (kgmole/h)               | 2537.68   | Molar Flow (kgmole/h)               | 2537.68   | 2537.70   | 0.00 |
| Mass Flow (kg/h)                    | 106787.00 | Mass Flow (kg/h)                    | 106787.00 | 106787.00 | 0.00 |
| Molecular Weight                    | 42.0806   | Molecular Weight                    | 42.0806   | 42.08     | 0.00 |
| Total                               | 1.0000    | Total                               | 1.0000    | 1.0000    |      |

| Variable                            | Simulation | 5012                                |          | Design   | %Error |
|-------------------------------------|------------|-------------------------------------|----------|----------|--------|
| <b>Component (%mol)</b>             |            | <b>Component (%mol)</b>             |          |          |        |
| Propene                             | 1.0000     | Propylene                           | 1.0000   | 1.0000   | 0.00   |
| <b>Operation Condition</b>          |            | <b>Operation Condition</b>          |          |          |        |
| Temperature (°C)                    | 34.87      | Temperature (°C)                    | 34.87    | 34.20    | -1.95  |
| Pressure (Kg/cm <sup>2</sup> gauge) | 16.64      | Pressure (Kg/cm <sup>2</sup> gauge) | 16.64    | 16.64    | 0.00   |
| Molar Flow (kgmole/h)               | 1703.14    | Molar Flow (kgmole/h)               | 1703.14  | 1703.10  | 0.00   |
| Mass Flow (kg/h)                    | 71669.00   | Mass Flow (kg/h)                    | 71669.00 | 71669.00 | 0.00   |
| Molecular Weight                    | 42.0806    | Molecular Weight                    | 42.0806  | 42.08    | 0.00   |
| Total                               | 1.0000     | Total                               | 1.0000   | 1.0000   |        |

| Variable                            | Simulation | 5076                                |         | Design  | %Error |
|-------------------------------------|------------|-------------------------------------|---------|---------|--------|
| <b>Component (%mol)</b>             |            | <b>Component (%mol)</b>             |         |         |        |
| Propene                             | 1.0000     | Propylene                           | 1.0000  | 1.0000  | 0.00   |
| <b>Operation Condition</b>          |            | <b>Operation Condition</b>          |         |         |        |
| Temperature (°C)                    | 34.87      | Temperature (°C)                    | 34.87   | 34.20   | -1.95  |
| Pressure (Kg/cm <sup>2</sup> gauge) | 16.64      | Pressure (Kg/cm <sup>2</sup> gauge) | 16.64   | 16.64   | 0.00   |
| Molar Flow (kgmole/h)               | 147.53     | Molar Flow (kgmole/h)               | 147.53  | 147.50  | -0.02  |
| Mass Flow (kg/h)                    | 6208.00    | Mass Flow (kg/h)                    | 6208.00 | 6208.00 | 0.00   |
| Molecular Weight                    | 42.0806    | Molecular Weight                    | 42.0806 | 42.08   | 0.00   |
| Total                               | 1.0000     | Total                               | 1.0000  | 1.0000  |        |

| Variable                            | Simulation | 5056                                |          | Design   | %Error |
|-------------------------------------|------------|-------------------------------------|----------|----------|--------|
| <b>Component (%mol)</b>             |            | <b>Component (%mol)</b>             |          |          |        |
| Propene                             | 1.0000     | Propylene                           | 1.0000   | 1.0000   | 0.00   |
| <b>Operation Condition</b>          |            | <b>Operation Condition</b>          |          |          |        |
| Temperature (°C)                    | 34.87      | Temperature (°C)                    | 34.87    | 34.20    | -1.95  |
| Pressure (Kg/cm <sup>2</sup> gauge) | 16.64      | Pressure (Kg/cm <sup>2</sup> gauge) | 16.64    | 16.64    | 0.00   |
| Molar Flow (kgmole/h)               | 319.20     | Molar Flow (kgmole/h)               | 319.20   | 319.20   | 0.00   |
| Mass Flow (kg/h)                    | 13432.00   | Mass Flow (kg/h)                    | 13432.00 | 13432.00 | 0.00   |
| Molecular Weight                    | 42.0806    | Molecular Weight                    | 42.0806  | 42.08    | 0.00   |
| Total                               | 1.0000     | Total                               | 1.0000   | 1.0000   |        |

| Variable                | Simulation | 5020                    |  | Design | %Error |
|-------------------------|------------|-------------------------|--|--------|--------|
| <b>Component (%mol)</b> |            | <b>Component (%mol)</b> |  |        |        |

**Simulation Report – ECC 860 KTA**  
**Working Stage 6**

---

|                                     |          |                                     |          |          |       |
|-------------------------------------|----------|-------------------------------------|----------|----------|-------|
| Propene                             | 1.0000   | Propylene                           | 1.0000   | 1.0000   | 0.00  |
| <b>Operation Condition</b>          |          | <b>Operation Condition</b>          |          |          |       |
| Temperature (°C)                    | 34.87    | Temperature (°C)                    | 34.87    | 34.20    | -1.95 |
| Pressure (Kg/cm <sup>2</sup> gauge) | 16.64    | Pressure (Kg/cm <sup>2</sup> gauge) | 16.64    | 16.64    | 0.00  |
| Molar Flow (kgmole/h)               | 288.11   | Molar Flow (kgmole/h)               | 288.11   | 288.10   | 0.00  |
| Mass Flow (kg/h)                    | 12124.00 | Mass Flow (kg/h)                    | 12124.00 | 12124.00 | 0.00  |
| Molecular Weight                    | 42.0806  | Molecular Weight                    | 42.0806  | 42.08    | 0.00  |
| Total                               | 1.0000   | Total                               | 1.0000   | 1.0000   |       |

| Variable                            | Simulation | 5023                                |         | Design  | %Error |
|-------------------------------------|------------|-------------------------------------|---------|---------|--------|
| <b>Component (%mol)</b>             |            | <b>Component (%mol)</b>             |         |         |        |
| Propene                             | 1.0000     | Propylene                           | 1.0000  | 1.0000  | 0.00   |
| <b>Operation Condition</b>          |            | <b>Operation Condition</b>          |         |         |        |
| Temperature (°C)                    | 34.87      | Temperature (°C)                    | 34.87   | 34.20   | -1.95  |
| Pressure (Kg/cm <sup>2</sup> gauge) | 16.64      | Pressure (Kg/cm <sup>2</sup> gauge) | 16.64   | 16.64   | 0.00   |
| Molar Flow (kgmole/h)               | 79.70      | Molar Flow (kgmole/h)               | 79.70   | 79.70   | -0.01  |
| Mass Flow (kg/h)                    | 3354.00    | Mass Flow (kg/h)                    | 3354.00 | 3354.00 | 0.00   |
| Molecular Weight                    | 42.0806    | Molecular Weight                    | 42.0806 | 42.08   | 0.00   |
| Total                               | 1.0000     | Total                               | 1.0000  | 1.0000  |        |

| Variable                            | Simulation | 5026                                |           | Design    | %Error |
|-------------------------------------|------------|-------------------------------------|-----------|-----------|--------|
| <b>Component (%mol)</b>             |            | <b>Component (%mol)</b>             |           |           |        |
| Propene                             | 1.0000     | Propylene                           | 1.0000    | 1.0000    | 0.00   |
| <b>Operation Condition</b>          |            | <b>Operation Condition</b>          |           |           |        |
| Temperature (°C)                    | 13.34      | Temperature (°C)                    | 13.34     | 13.20     | -1.08  |
| Pressure (Kg/cm <sup>2</sup> gauge) | 7.64       | Pressure (Kg/cm <sup>2</sup> gauge) | 7.64      | 7.64      | 0.00   |
| Molar Flow (kgmole/h)               | 2537.68    | Molar Flow (kgmole/h)               | 2537.68   | 2537.70   | 0.00   |
| Mass Flow (kg/h)                    | 106787.00  | Mass Flow (kg/h)                    | 106787.00 | 106787.00 | 0.00   |
| Molecular Weight                    | 42.0806    | Molecular Weight                    | 42.0806   | 42.08     | 0.00   |
| Total                               | 1.0000     | Total                               | 1.0000    | 1.0000    |        |

| Variable                            | Simulation | 5079                                |         | Design  | %Error |
|-------------------------------------|------------|-------------------------------------|---------|---------|--------|
| <b>Component (%mol)</b>             |            | <b>Component (%mol)</b>             |         |         |        |
| Propene                             | 1.0000     | Propylene                           | 1.0000  | 1.0000  | 0.00   |
| <b>Operation Condition</b>          |            | <b>Operation Condition</b>          |         |         |        |
| Temperature (°C)                    | 3.99       | Temperature (°C)                    | 3.99    | 3.60    | -10.96 |
| Pressure (Kg/cm <sup>2</sup> gauge) | 7.50       | Pressure (Kg/cm <sup>2</sup> gauge) | 7.50    | 7.50    | 0.00   |
| Molar Flow (kgmole/h)               | 48.50      | Molar Flow (kgmole/h)               | 48.50   | 48.50   | 0.00   |
| Mass Flow (kg/h)                    | 2041.00    | Mass Flow (kg/h)                    | 2041.00 | 2041.00 | 0.00   |
| Molecular Weight                    | 42.0806    | Molecular Weight                    | 42.0806 | 42.08   | 0.00   |
| Total                               | 1.0000     | Total                               | 1.0000  | 1.0000  |        |

**Simulation Report – ECC 860 KTA**  
**Working Stage 6**

---

| Variable                            | Simulation | 5080                                |         | Design  | %Error |
|-------------------------------------|------------|-------------------------------------|---------|---------|--------|
| Component (%mol)                    |            | Component (%mol)                    |         |         |        |
| Propene                             | 1.0000     | Propylene                           | 1.0000  | 1.0000  | 0.00   |
| Operation Condition                 |            | Operation Condition                 |         |         |        |
| Temperature (°C)                    | 3.99       | Temperature (°C)                    | 3.99    | 3.60    | -10.96 |
| Pressure (Kg/cm <sup>2</sup> gauge) | 7.50       | Pressure (Kg/cm <sup>2</sup> gauge) | 7.50    | 7.50    | 0.00   |
| Molar Flow (kgmole/h)               | 30.66      | Molar Flow (kgmole/h)               | 30.66   | 30.60   | -0.18  |
| Mass Flow (kg/h)                    | 1290.00    | Mass Flow (kg/h)                    | 1290.00 | 1290.00 | 0.00   |
| Molecular Weight                    | 42.0806    | Molecular Weight                    | 42.0806 | 42.08   | 0.00   |
| Total                               | 1.0000     | Total                               | 1.0000  | 1.0000  |        |

| Variable                            | Simulation | 5085                                |         | Design | %Error |
|-------------------------------------|------------|-------------------------------------|---------|--------|--------|
| Component (%mol)                    |            | Component (%mol)                    |         |        |        |
| Propene                             | 1.0000     | Propylene                           | 1.0000  | 1.0000 | 0.00   |
| Operation Condition                 |            | Operation Condition                 |         |        |        |
| Temperature (°C)                    | 3.99       | Temperature (°C)                    | 3.99    | 3.60   | -10.96 |
| Pressure (Kg/cm <sup>2</sup> gauge) | 7.50       | Pressure (Kg/cm <sup>2</sup> gauge) | 7.50    | 7.50   | 0.00   |
| Molar Flow (kgmole/h)               | 17.85      | Molar Flow (kgmole/h)               | 17.85   | 17.90  | 0.30   |
| Mass Flow (kg/h)                    | 751.00     | Mass Flow (kg/h)                    | 751.00  | 751.00 | 0.00   |
| Molecular Weight                    | 42.0806    | Molecular Weight                    | 42.0806 | 42.08  | 0.00   |
| Total                               | 1.0000     | Total                               | 1.0000  | 1.0000 |        |

| Variable                            | Simulation | 5033                                |          | Design   | %Error |
|-------------------------------------|------------|-------------------------------------|----------|----------|--------|
| Component (%mol)                    |            | Component (%mol)                    |          |          |        |
| Propene                             | 1.0000     | Propylene                           | 1.0000   | 1.0000   | 0.00   |
| Operation Condition                 |            | Operation Condition                 |          |          |        |
| Temperature (°C)                    | 13.34      | Temperature (°C)                    | 13.34    | 13.20    | -1.06  |
| Pressure (Kg/cm <sup>2</sup> gauge) | 7.64       | Pressure (Kg/cm <sup>2</sup> gauge) | 7.64     | 7.64     | 0.00   |
| Molar Flow (kgmole/h)               | 884.04     | Molar Flow (kgmole/h)               | 884.04   | 883.90   | -0.02  |
| Mass Flow (kg/h)                    | 37200.98   | Mass Flow (kg/h)                    | 37200.98 | 37197.00 | -0.01  |
| Molecular Weight                    | 42.0806    | Molecular Weight                    | 42.0806  | 42.08    | 0.00   |
| Total                               | 1.0000     | Total                               | 1.0000   | 1.0000   |        |

**Table A.4.4. Propylene Fractionation No.3 Stream Compositions**

**Simulation Report – ECC 860 KTA**  
**Working Stage 6**

| Variable                            | Integration | 4551                                |          | Unit Simulation | %Error |
|-------------------------------------|-------------|-------------------------------------|----------|-----------------|--------|
| Component (%mol)                    |             | Component (%mol)                    |          |                 |        |
| Hydrogen                            | 0.0063      | Hydrogen                            | 0.0063   | 0.0063          | 0.00   |
| Methane                             | 0.0023      | Methane                             | 0.0023   | 0.0023          | 0.00   |
| Ethane                              | 0.0000      | Ethane                              | 0.0000   | 0.0000          |        |
| Propadiene                          | 0.0002      | Propadiene/Methylacetylene          | 0.0002   | 0.0002          | 0.00   |
| Propene                             | 0.9419      | Propylene                           | 0.9419   | 0.9419          | 0.00   |
| Propane                             | 0.0476      | Propane                             | 0.0476   | 0.0476          | 0.00   |
| 13-Butadiene                        | 0.0001      | Butadienes/C4Acetylenes             | 0.0001   | 0.0001          | 0.00   |
| 1-Butene                            | 0.0015      | Butylenes                           | 0.0015   | 0.0015          | 0.00   |
| n-Butane                            | 0.0000      | Butanes                             | 0.0000   | 0.0000          |        |
| Nitrogen                            | 0.0001      | Nitrogen                            | 0.0001   | 0.0001          | 0.00   |
| Operation Condition                 |             | Operation Condition                 |          |                 |        |
| Temperature (°C)                    | 50.90       | Temperature (°C)                    | 50.90    | 50.90           | 0.00   |
| Pressure (Kg/cm <sup>2</sup> gauge) | 19.19       | Pressure (Kg/cm <sup>2</sup> gauge) | 19.19    | 19.19           | 0.00   |
| Molar Flow (kgmole/h)               | 439.11      | Molar Flow (kgmole/h)               | 439.11   | 439.11          | 0.00   |
| Mass Flow (kg/h)                    | 18392.00    | Mass Flow (kg/h)                    | 18392.00 | 18392.00        | 0.00   |
| Molecular Weight                    | 41.8847     | Molecular Weight                    | 41.8847  | 41.8847         | 0.00   |
| Total                               | 1.0000      | Total                               | 1.0000   | 1.0000          |        |
| Variable                            | Integration | 4552                                |          | Unit Simulation | %Error |
| Component (%mol)                    |             | Component (%mol)                    |          |                 |        |
| Hydrogen                            | 0.0000      | Hydrogen                            | 0.0000   | 0.0000          |        |
| Methane                             | 0.0000      | Methane                             | 0.0000   | 0.0000          |        |
| Ethane                              | 0.0000      | Ethane                              | 0.0000   | 0.0000          |        |
| Propadiene                          | 0.0000      | Propadiene/Methylacetylene          | 0.0000   | 0.0000          |        |
| Propene                             | 0.9950      | Propylene                           | 0.9950   | 0.9950          | 0.00   |
| Propane                             | 0.0049      | Propane                             | 0.0049   | 0.0049          | 0.01   |
| 13-Butadiene                        | 0.0000      | Butadienes/C4Acetylenes             | 0.0000   | 0.0000          |        |
| 1-Butene                            | 0.0000      | Butylenes                           | 0.0000   | 0.0000          |        |
| n-Butane                            | 0.0000      | Butanes                             | 0.0000   | 0.0000          |        |
| Nitrogen                            | 0.0000      | Nitrogen                            | 0.0000   | 0.0000          |        |
| Operation Condition                 |             | Operation Condition                 |          |                 |        |
| Temperature (°C)                    | 46.60       | Temperature (°C)                    | 46.60    | 46.60           | 0.00   |
| Pressure (Kg/cm <sup>2</sup> gauge) | 18.38       | Pressure (Kg/cm <sup>2</sup> gauge) | 18.38    | 18.38           | 0.00   |
| Molar Flow (kgmole/h)               | 407.51      | Molar Flow (kgmole/h)               | 407.51   | 407.49          | -0.01  |
| Mass Flow (kg/h)                    | 17151.76    | Mass Flow (kg/h)                    | 17151.76 | 17150.89        | -0.01  |
| Molecular Weight                    | 42.0889     | Molecular Weight                    | 42.0889  | 42.0889         | 0.00   |
| Total                               | 1.0000      | Total                               | 1.0000   | 1.0000          |        |
| Variable                            | Integration | 4573                                |          | Unit Simulation | %Error |
| Component (%mol)                    |             | Component (%mol)                    |          |                 |        |
| Hydrogen                            | 0.0056      | Hydrogen                            | 0.0056   | 0.0056          | 0.00   |
| Methane                             | 0.0104      | Methane                             | 0.0104   | 0.0104          | 0.00   |
| Ethane                              | 0.0004      | Ethane                              | 0.0004   | 0.0004          | 0.00   |



# Simulation Report – ECC 860 KTA

## Working Stage 6

|                                     |                    |                                     |         |                        |               |
|-------------------------------------|--------------------|-------------------------------------|---------|------------------------|---------------|
| Propadiene                          | 0.0000             | Propadiene/Methylacetylene          | 0.0000  | 0.0000                 |               |
| Propene                             | 0.9804             | Propylene                           | 0.9804  | 0.9804                 | 0.00          |
| Propane                             | 0.0031             | Propane                             | 0.0031  | 0.0031                 | 0.00          |
| 13-Butadiene                        | 0.0000             | Butadienes/C4Acetylenes             | 0.0000  | 0.0000                 |               |
| 1-Butene                            | 0.0000             | Butylenes                           | 0.0000  | 0.0000                 |               |
| n-Butane                            | 0.0000             | Butanes                             | 0.0000  | 0.0000                 |               |
| Nitrogen                            | 0.0001             | Nitrogen                            | 0.0001  | 0.0001                 | 0.00          |
| <b>Operation Condition</b>          |                    | <b>Operation Condition</b>          |         |                        |               |
| Temperature (°C)                    | 29.75              | Temperature (°C)                    | 29.75   | 29.75                  | 0.00          |
| Pressure (Kg/cm <sup>2</sup> gauge) | 17.43              | Pressure (Kg/cm <sup>2</sup> gauge) | 17.43   | 17.43                  | 0.00          |
| Molar Flow (kgmole/h)               | 120.91             | Molar Flow (kgmole/h)               | 120.91  | 120.91                 | 0.00          |
| Mass Flow (kg/h)                    | 5028.11            | Mass Flow (kg/h)                    | 5028.11 | 5028.11                | 0.00          |
| Molecular Weight                    | 41.5853            | Molecular Weight                    | 41.5853 | 41.5853                | 0.00          |
| Total                               | 1.0000             | Total                               | 1.0000  | 1.0000                 |               |
| <b>Variable</b>                     | <b>Integration</b> | <b>4572</b>                         |         | <b>Unit Simulation</b> | <b>%Error</b> |
| <b>Component (%mol)</b>             |                    | <b>Component (%mol)</b>             |         |                        |               |
| Hydrogen                            | 0.1504             | Hydrogen                            | 0.1504  | 0.1503                 | -0.10         |
| Methane                             | 0.0830             | Methane                             | 0.0830  | 0.0829                 | -0.05         |
| Ethane                              | 0.0008             | Ethane                              | 0.0008  | 0.0008                 | 0.00          |
| Propadiene                          | 0.0000             | Propadiene/Methylacetylene          | 0.0000  | 0.0000                 |               |
| Propene                             | 0.7623             | Propylene                           | 0.7623  | 0.7625                 | 0.03          |
| Propane                             | 0.0022             | Propane                             | 0.0022  | 0.0022                 | 0.03          |
| 13-Butadiene                        | 0.0000             | Butadienes/C4Acetylenes             | 0.0000  | 0.0000                 |               |
| 1-Butene                            | 0.0000             | Butylenes                           | 0.0000  | 0.0000                 |               |
| n-Butane                            | 0.0000             | Butanes                             | 0.0000  | 0.0000                 |               |
| Nitrogen                            | 0.0013             | Nitrogen                            | 0.0013  | 0.0013                 |               |
| <b>Operation Condition</b>          |                    | <b>Operation Condition</b>          |         |                        |               |
| Temperature (°C)                    | 20.30491642        | Temperature (°C)                    | 20.30   | 20.36                  | 0.28          |
| Pressure (Kg/cm <sup>2</sup> gauge) | 9.47               | Pressure (Kg/cm <sup>2</sup> gauge) | 9.47    | 9.47                   | 0.00          |
| Molar Flow (kgmole/h)               | 10.19              | Molar Flow (kgmole/h)               | 10.19   | 10.20                  | 0.10          |
| Mass Flow (kg/h)                    | 345.28             | Mass Flow (kg/h)                    | 345.28  | 346.10                 | 0.24          |
| Molecular Weight                    | 33.8695            | Molecular Weight                    | 33.8695 | 33.9172                | 0.14          |
| Total                               | 1.0000             | Total                               | 1.0000  | 1.0000                 |               |
| <b>Variable</b>                     | <b>Integration</b> | <b>4558</b>                         |         | <b>Unit Simulation</b> | <b>%Error</b> |
| <b>Component (%mol)</b>             |                    | <b>Component (%mol)</b>             |         |                        |               |
| Hydrogen                            | 0.0006             | Hydrogen                            | 0.0006  | 0.0006                 | 0.00          |
| Methane                             | 0.0021             | Methane                             | 0.0021  | 0.0021                 | 0.00          |
| Ethane                              | 0.0002             | Ethane                              | 0.0002  | 0.0002                 | 0.00          |
| Propadiene                          | 0.0000             | Propadiene/Methylacetylene          | 0.0000  | 0.0000                 |               |
| Propene                             | 0.9935             | Propylene                           | 0.9935  | 0.9935                 | 0.00          |
| Propane                             | 0.0035             | Propane                             | 0.0035  | 0.0035                 | 0.00          |
| 13-Butadiene                        | 0.0000             | Butadienes/C4Acetylenes             | 0.0000  | 0.0000                 |               |
| 1-Butene                            | 0.0000             | Butylenes                           | 0.0000  | 0.0000                 |               |

**Simulation Report – ECC 860 KTA**  
**Working Stage 6**

|                                     |                    |                                     |           |                        |               |
|-------------------------------------|--------------------|-------------------------------------|-----------|------------------------|---------------|
| n-Butane                            | 0.0000             | Butanes                             | 0.0000    | 0.0000                 |               |
| Nitrogen                            | 0.0000             | Nitrogen                            | 0.0000    | 0.0000                 |               |
| <b>Operation Condition</b>          |                    | <b>Operation Condition</b>          |           |                        |               |
| Temperature (°C)                    | 41.50              | Temperature (°C)                    | 41.50     | 41.50                  | 0.00          |
| Pressure (Kg/cm <sup>2</sup> gauge) | 18.33              | Pressure (Kg/cm <sup>2</sup> gauge) | 18.33     | 18.33                  | 0.00          |
| Molar Flow (kgmole/h)               | 6095.74            | Molar Flow (kgmole/h)               | 6095.74   | 6095.74                | 0.00          |
| Mass Flow (kg/h)                    | 256060.64          | Mass Flow (kg/h)                    | 256060.64 | 256060.64              | 0.00          |
| Molecular Weight                    | 42.0065            | Molecular Weight                    | 42.0065   | 42.0065                | 0.00          |
| Total                               | 1.0000             | Total                               | 1.0000    | 1.0000                 |               |
| <b>Variable</b>                     | <b>Integration</b> | <b>4561</b>                         |           | <b>Unit Simulation</b> | <b>%Error</b> |
| <b>Component (%mol)</b>             |                    | <b>Component (%mol)</b>             |           |                        |               |
| Hydrogen                            | 0.0000             | Hydrogen                            | 0.0000    | 0.0000                 |               |
| Methane                             | 0.0000             | Methane                             | 0.0000    | 0.0000                 |               |
| Ethane                              | 0.0000             | Ethane                              | 0.0000    | 0.0000                 |               |
| Propadiene                          | 0.0040             | Propadiene/Methylacetylene          | 0.0040    | 0.0040                 | 0.00          |
| Propene                             | 0.0430             | Propylene                           | 0.0430    | 0.0430                 | 0.02          |
| Propane                             | 0.9208             | Propane                             | 0.9208    | 0.9208                 | 0.00          |
| 13-Butadiene                        | 0.0020             | Butadienes/C4Acetylenes             | 0.0020    | 0.0020                 | 0.00          |
| 1-Butene                            | 0.0302             | Butylenes                           | 0.0302    | 0.0302                 | 0.00          |
| n-Butane                            | 0.0000             | Butanes                             | 0.0000    | 0.0000                 |               |
| Nitrogen                            | 0.0000             | Nitrogen                            | 0.0000    | 0.0000                 |               |
| <b>Operation Condition</b>          |                    | <b>Operation Condition</b>          |           |                        |               |
| Temperature (°C)                    | 58.11              | Temperature (°C)                    | 58.11     | 58.11                  | 0.00          |
| Pressure (Kg/cm <sup>2</sup> gauge) | 19.44              | Pressure (Kg/cm <sup>2</sup> gauge) | 19.44     | 19.44                  | 0.00          |
| Molar Flow (kgmole/h)               | 21.82              | Molar Flow (kgmole/h)               | 21.82     | 21.82                  | 0.00          |
| Mass Flow (kg/h)                    | 968.10             | Mass Flow (kg/h)                    | 968.10    | 968.10                 | 0.00          |
| Molecular Weight                    | 44.3768            | Molecular Weight                    | 44.3768   | 44.3768                | 0.00          |
| Total                               | 1.0000             | Total                               | 1.0000    | 1.0000                 |               |
| <b>Variable</b>                     | <b>Integration</b> | <b>4565</b>                         |           | <b>Unit Simulation</b> | <b>%Error</b> |
| <b>Component (%mol)</b>             |                    | <b>Component (%mol)</b>             |           |                        |               |
| Hydrogen                            | 0.0168             | Hydrogen                            | 0.0168    | 0.0168                 | 0.00          |
| Methane                             | 0.0161             | Methane                             | 0.0161    | 0.0161                 | 0.00          |
| Ethane                              | 0.0004             | Ethane                              | 0.0004    | 0.0004                 | 0.00          |
| Propadiene                          | 0.0000             | Propadiene/Methylacetylene          | 0.0000    | 0.0000                 |               |
| Propene                             | 0.9635             | Propylene                           | 0.9635    | 0.9635                 | 0.00          |
| Propane                             | 0.0030             | Propane                             | 0.0030    | 0.0030                 | 0.00          |
| 13-Butadiene                        | 0.0000             | Butadienes/C4Acetylenes             | 0.0000    | 0.0000                 |               |
| 1-Butene                            | 0.0000             | Butylenes                           | 0.0000    | 0.0000                 |               |
| n-Butane                            | 0.0000             | Butanes                             | 0.0000    | 0.0000                 |               |
| Nitrogen                            | 0.0002             | Nitrogen                            | 0.0002    | 0.0002                 | 0.00          |
| <b>Operation Condition</b>          |                    | <b>Operation Condition</b>          |           |                        |               |
| Temperature (°C)                    | 42.53              | Temperature (°C)                    | 42.53     | 42.53                  | 0.00          |
| Pressure (Kg/cm <sup>2</sup> gauge) | 17.52              | Pressure (Kg/cm <sup>2</sup> gauge) | 17.52     | 17.52                  | 0.00          |

# Simulation Report – ECC 860 KTA

## Working Stage 6

|                                     |                    |                                     |           |                        |               |
|-------------------------------------|--------------------|-------------------------------------|-----------|------------------------|---------------|
| Molar Flow (kgmole/h)               | 131.29             | Molar Flow (kgmole/h)               | 131.29    | 131.29                 | 0.00          |
| Mass Flow (kg/h)                    | 5381.16            | Mass Flow (kg/h)                    | 5381.16   | 5381.11                | 0.00          |
| Molecular Weight                    | 40.9859            | Molecular Weight                    | 40.9859   | 40.9859                | 0.00          |
| Total                               | 1.0000             | Total                               | 1.0000    | 1.0000                 |               |
| <b>Variable</b>                     | <b>Integration</b> | <b>4556</b>                         |           | <b>Unit Simulation</b> | <b>%Error</b> |
| <b>Component (%mol)</b>             |                    | <b>Component (%mol)</b>             |           |                        |               |
| Hydrogen                            | 0.0008             | Hydrogen                            | 0.0008    | 0.0008                 | 0.00          |
| Methane                             | 0.0022             | Methane                             | 0.0022    | 0.0022                 | 0.00          |
| Ethane                              | 0.0002             | Ethane                              | 0.0002    | 0.0002                 | 0.00          |
| Propadiene                          | 0.0000             | Propadiene/Methylacetylene          | 0.0000    | 0.0000                 |               |
| Propene                             | 0.9935             | Propylene                           | 0.9935    | 0.9935                 | 0.00          |
| Propane                             | 0.0033             | Propane                             | 0.0033    | 0.0033                 | 0.00          |
| 13-Butadiene                        | 0.0000             | Butadienes/C4Acetylenes             | 0.0000    | 0.0000                 |               |
| 1-Butene                            | 0.0000             | Butylenes                           | 0.0000    | 0.0000                 |               |
| n-Butane                            | 0.0000             | Butanes                             | 0.0000    | 0.0000                 |               |
| Nitrogen                            | 0.0000             | Nitrogen                            | 0.0000    | 0.0000                 |               |
| <b>Operation Condition</b>          |                    | <b>Operation Condition</b>          |           |                        |               |
| Temperature (°C)                    | 42.53              | Temperature (°C)                    | 42.53     | 42.53                  | 0.00          |
| Pressure (Kg/cm <sup>2</sup> gauge) | 17.52              | Pressure (Kg/cm <sup>2</sup> gauge) | 17.52     | 17.52                  | 0.00          |
| Molar Flow (kgmole/h)               | 6095.14            | Molar Flow (kgmole/h)               | 6095.14   | 6095.16                | 0.00          |
| Mass Flow (kg/h)                    | 255979.72          | Mass Flow (kg/h)                    | 255979.72 | 255980.66              | 0.00          |
| Molecular Weight                    | 41.9974            | Molecular Weight                    | 42.00     | 42.00                  | 0.00          |
| Total                               | 1.0000             | Total                               | 1.0000    | 1.0000                 |               |
| <b>Variable</b>                     | <b>Integration</b> | <b>4554</b>                         |           | <b>Unit Simulation</b> | <b>%Error</b> |
| <b>Component (%mol)</b>             |                    | <b>Component (%mol)</b>             |           |                        |               |
| Hydrogen                            | 0.0010             | Hydrogen                            | 0.0010    | 0.0010                 | 0.00          |
| Methane                             | 0.0023             | Methane                             | 0.0023    | 0.0023                 | 0.00          |
| Ethane                              | 0.0002             | Ethane                              | 0.0002    | 0.0002                 | 0.00          |
| Propadiene                          | 0.0000             | Propadiene/Methylacetylene          | 0.0000    | 0.0000                 |               |
| Propene                             | 0.9931             | Propylene                           | 0.9931    | 0.9931                 | 0.00          |
| Propane                             | 0.0033             | Propane                             | 0.0033    | 0.0033                 | 0.00          |
| 13-Butadiene                        | 0.0000             | Butadienes/C4Acetylenes             | 0.0000    | 0.0000                 |               |
| 1-Butene                            | 0.0000             | Butylenes                           | 0.0000    | 0.0000                 |               |
| n-Butane                            | 0.0000             | Butanes                             | 0.0000    | 0.0000                 |               |
| Nitrogen                            | 0.0000             | Nitrogen                            | 0.0000    | 0.0000                 |               |
| <b>Operation Condition</b>          |                    | <b>Operation Condition</b>          |           |                        |               |
| Temperature (°C)                    | 46.30              | Temperature (°C)                    | 46.30     | 46.30                  | 0.00          |
| Pressure (Kg/cm <sup>2</sup> gauge) | 18.33              | Pressure (Kg/cm <sup>2</sup> gauge) | 18.33     | 18.33                  | 0.00          |
| Molar Flow (kgmole/h)               | 6105.52            | Molar Flow (kgmole/h)               | 6105.52   | 6105.54                | 0.00          |
| Mass Flow (kg/h)                    | 256332.77          | Mass Flow (kg/h)                    | 256332.77 | 256333.65              | 0.00          |
| Molecular Weight                    | 41.9838            | Molecular Weight                    | 41.9838   | 41.9838                | 0.00          |
| Total                               | 1.0000             | Total                               | 1.0000    | 1.0000                 |               |
| <b>Variable</b>                     | <b>Integration</b> | <b>4555</b>                         |           | <b>Unit Simulation</b> | <b>%Error</b> |

# Simulation Report – ECC 860 KTA

## Working Stage 6

| Component (%mol)                    |                    | Component (%mol)                    |           |                        |               |
|-------------------------------------|--------------------|-------------------------------------|-----------|------------------------|---------------|
| Hydrogen                            | 0.0010             | Hydrogen                            | 0.0010    | 0.0010                 | 0.00          |
| Methane                             | 0.0023             | Methane                             | 0.0023    | 0.0023                 | 0.00          |
| Ethane                              | 0.0002             | Ethane                              | 0.0002    | 0.0002                 | 0.00          |
| Propadiene                          | 0.0000             | Propadiene/Methylacetylene          | 0.0000    | 0.0000                 |               |
| Propene                             | 0.9931             | Propylene                           | 0.9931    | 0.9931                 | 0.00          |
| Propane                             | 0.0033             | Propane                             | 0.0033    | 0.0033                 | 0.00          |
| 13-Butadiene                        | 0.0000             | Butadienes/C4Acetylenes             | 0.0000    | 0.0000                 |               |
| 1-Butene                            | 0.0000             | Butylenes                           | 0.0000    | 0.0000                 |               |
| n-Butane                            | 0.0000             | Butanes                             | 0.0000    | 0.0000                 |               |
| Nitrogen                            | 0.0000             | Nitrogen                            | 0.0000    | 0.0000                 |               |
| <b>Operation Condition</b>          |                    | <b>Operation Condition</b>          |           |                        |               |
| Temperature (°C)                    | 43.65              | Temperature (°C)                    | 43.65     | 43.65                  | -0.01         |
| Pressure (Kg/cm <sup>2</sup> gauge) | 17.98              | Pressure (Kg/cm <sup>2</sup> gauge) | 17.98     | 17.98                  | 0.00          |
| Molar Flow (kgmole/h)               | 6105.52            | Molar Flow (kgmole/h)               | 6105.52   | 6105.54                | 0.00          |
| Mass Flow (kg/h)                    | 256332.77          | Mass Flow (kg/h)                    | 256332.77 | 256333.65              | 0.00          |
| Molecular Weight                    | 41.9838            | Molecular Weight                    | 41.9838   | 41.9838                | 0.00          |
| Total                               | 1.0000             | Total                               | 1.0000    | 1.0000                 |               |
| <b>Variable</b>                     | <b>Integration</b> | <b>4571</b>                         |           | <b>Unit Simulation</b> | <b>%Error</b> |
| <b>Component (%mol)</b>             |                    | <b>Component (%mol)</b>             |           |                        |               |
| Hydrogen                            | 0.1504             | Hydrogen                            | 0.1504    | 0.1503                 | -0.10         |
| Methane                             | 0.0830             | Methane                             | 0.0830    | 0.0829                 | -0.05         |
| Ethane                              | 0.0008             | Ethane                              | 0.0008    | 0.0008                 | 0.00          |
| Propadiene                          | 0.0000             | Propadiene/Methylacetylene          | 0.0000    | 0.0000                 |               |
| Propene                             | 0.7623             | Propylene                           | 0.7623    | 0.7625                 | 0.03          |
| Propane                             | 0.0022             | Propane                             | 0.0022    | 0.0022                 | 0.03          |
| 13-Butadiene                        | 0.0000             | Butadienes/C4Acetylenes             | 0.0000    | 0.0000                 |               |
| 1-Butene                            | 0.0000             | Butylenes                           | 0.0000    | 0.0000                 |               |
| n-Butane                            | 0.0000             | Butanes                             | 0.0000    | 0.0000                 |               |
| Nitrogen                            | 0.0013             | Nitrogen                            | 0.0013    | 0.0013                 | -0.09         |
| <b>Operation Condition</b>          |                    | <b>Operation Condition</b>          |           |                        |               |
| Temperature (°C)                    | 29.73783073        | Temperature (°C)                    | 29.74     | 29.75                  | 0.04          |
| Pressure (Kg/cm <sup>2</sup> gauge) | 17.43              | Pressure (Kg/cm <sup>2</sup> gauge) | 17.43     | 17.43                  | 0.00          |
| Molar Flow (kgmole/h)               | 10.19449519        | Molar Flow (kgmole/h)               | 10.19     | 10.21                  | 0.14          |
| Mass Flow (kg/h)                    | 345.2828064        | Mass Flow (kg/h)                    | 345.28    | 345.85                 | 0.16          |
| Molecular Weight                    | 33.8768            | Molecular Weight                    | 33.8768   | 33.8768                | 0.00          |
| Total                               | 1.0000             | Total                               | 1.0000    | 1.0000                 |               |
| <b>Variable</b>                     | <b>Integration</b> | <b>4553</b>                         |           | <b>Unit Simulation</b> | <b>%Error</b> |
| <b>Component (%mol)</b>             |                    | <b>Component (%mol)</b>             |           |                        |               |
| Hydrogen                            | 0.0000             | Hydrogen                            | 0.0000    | 0.0000                 |               |
| Methane                             | 0.0000             | Methane                             | 0.0000    | 0.0000                 |               |
| Ethane                              | 0.0000             | Ethane                              | 0.0000    | 0.0000                 |               |
| Propadiene                          | 0.0000             | Propadiene/Methylacetylene          | 0.0000    | 0.0000                 |               |

**Simulation Report – ECC 860 KTA**  
**Working Stage 6**

|                                     |             |                                     |          |          |       |
|-------------------------------------|-------------|-------------------------------------|----------|----------|-------|
| Propene                             | 0.9951      | Propylene                           | 0.9951   | 0.9950   | -0.01 |
| Propane                             | 0.0049      | Propane                             | 0.0049   | 0.0049   | 1.00  |
| 13-Butadiene                        | 0.0000      | Butadienes/C4Acetylenes             | 0.0000   | 0.0000   |       |
| 1-Butene                            | 0.0000      | Butylenes                           | 0.0000   | 0.0000   |       |
| n-Butane                            | 0.0000      | Butanes                             | 0.0000   | 0.0000   |       |
| Nitrogen                            | 0.0000      | Nitrogen                            | 0.0000   | 0.0000   |       |
| <b>Operation Condition</b>          | 0           | <b>Operation Condition</b>          |          |          |       |
| Temperature (°C)                    | 40.00       | Temperature (°C)                    | 40.00    | 40.00    | 0.00  |
| Pressure (Kg/cm <sup>2</sup> gauge) | 17.00       | Pressure (Kg/cm <sup>2</sup> gauge) | 17.00    | 17.00    | 0.00  |
| Molar Flow (kgmole/h)               | 407.5124185 | Molar Flow (kgmole/h)               | 407.51   | 407.49   | -0.01 |
| Mass Flow (kg/h)                    | 17151.76373 | Mass Flow (kg/h)                    | 17151.76 | 17150.89 | -0.01 |
| Molecular Weight                    | 42.0905     | Molecular Weight                    | 42.0905  | 42.09    | 0.00  |
| Total                               | 1.0000      | Total                               | 1.0000   | 1.0000   |       |

**Table A.4.5. Propylene Fractionation Stream Compositions**

| Variable                            | Integration | 4501                                |          | Unit Simulation | %Error |
|-------------------------------------|-------------|-------------------------------------|----------|-----------------|--------|
| <b>Component (%mol)</b>             |             | <b>Component (%mol)</b>             |          |                 |        |
| Hydrogen                            | 0.0063      | Hydrogen                            | 0.0063   | 0.0063          | 0.00   |
| Methane                             | 0.0023      | Methane                             | 0.0023   | 0.0023          | 0.00   |
| Ethane                              | 0.0000      | Ethane                              | 0.0000   | 0.0000          |        |
| Propadiene                          | 0.0002      | Propadiene/Methylacetylene          | 0.0002   | 0.0002          | 0.00   |
| Propene                             | 0.9420      | Propylene                           | 0.9420   | 0.9420          | 0.00   |
| Propane                             | 0.0476      | Propane                             | 0.0476   | 0.0476          | 0.00   |
| 13-Butadiene                        | 0.0001      | Butadienes/C4Acetylenes             | 0.0001   | 0.0001          | 0.00   |
| 1-Butene                            | 0.0015      | Butylenes                           | 0.0015   | 0.0015          | 0.00   |
| n-Butane                            | 0.0000      | Butanes                             | 0.0000   | 0.0000          |        |
| Nitrogen                            | 0.0000      | Nitrogen                            | 0.0000   | 0.0000          |        |
| <b>Operation Condition</b>          | 0           | <b>Operation Condition</b>          |          | 0               |        |
| Temperature (°C)                    | 50.90       | Temperature (°C)                    | 50.90    | 50.90           | 0.00   |
| Pressure (Kg/cm <sup>2</sup> gauge) | 19.17       | Pressure (Kg/cm <sup>2</sup> gauge) | 19.17    | 19.17           | 0.00   |
| Molar Flow (kgmole/h)               | 951.94      | Molar Flow (kgmole/h)               | 951.94   | 951.94          | 0.00   |
| Mass Flow (kg/h)                    | 39873.00    | Mass Flow (kg/h)                    | 39873.00 | 39873.00        | 0.00   |
| Molecular Weight                    | 41.8861     | Molecular Weight                    | 41.8861  | 41.89           | 0.00   |
| Total                               | 1.0000      | Total                               | 1.0000   | 1.0000          |        |
| Variable                            | Integration | 4504                                |          | Unit Simulation | %Error |
| <b>Component (%mol)</b>             |             | <b>Component (%mol)</b>             |          |                 |        |
| Hydrogen                            | 0.0012      | Hydrogen                            | 0.0012   | 0.0012          | 0.00   |
| Methane                             | 0.0022      | Methane                             | 0.0022   | 0.0022          | 0.00   |
| Ethane                              | 0.0002      | Ethane                              | 0.0002   | 0.0002          | 0.00   |
| Propadiene                          | 0.0000      | Propadiene/Methylacetylene          | 0.0000   | 0.0000          |        |
| Propene                             | 0.9928      | Propylene                           | 0.9928   | 0.9928          | 0.00   |
| Propane                             | 0.0036      | Propane                             | 0.0036   | 0.0036          | 0.00   |
| 13-Butadiene                        | 0.0000      | Butadienes/C4Acetylenes             | 0.0000   | 0.0000          |        |

# Simulation Report – ECC 860 KTA

## Working Stage 6

|                                     |                    |                                     |           |                        |               |
|-------------------------------------|--------------------|-------------------------------------|-----------|------------------------|---------------|
| 1-Butene                            | 0.0000             | Butylenes                           | 0.0000    | 0.0000                 |               |
| n-Butane                            | 0.0000             | Butanes                             | 0.0000    | 0.0000                 |               |
| Nitrogen                            | 0.0000             | Nitrogen                            | 0.0000    | 0.0000                 |               |
| <b>Operation Condition</b>          | 0                  | <b>Operation Condition</b>          |           | 0                      |               |
| Temperature (°C)                    | 45.23              | Temperature (°C)                    | 45.23     | 45.23                  | 0.00          |
| Pressure (Kg/cm <sup>2</sup> gauge) | 18.33              | Pressure (Kg/cm <sup>2</sup> gauge) | 18.33     | 18.33                  | 0.00          |
| Molar Flow (kgmole/h)               | 11047.88           | Molar Flow (kgmole/h)               | 11047.88  | 11047.88               | 0.00          |
| Mass Flow (kg/h)                    | 463775.98          | Mass Flow (kg/h)                    | 463775.98 | 463775.98              | 0.00          |
| Molecular Weight                    | 41.9787            | Molecular Weight                    | 41.9787   | 41.98                  | 0.00          |
| Total                               | 1.0000             | Total                               | 1.0000    | 1.0000                 |               |
| <b>Variable</b>                     | <b>Integration</b> | <b>4521</b>                         |           | <b>Unit Simulation</b> | <b>%Error</b> |
| <b>Component (%mol)</b>             |                    | <b>Component (%mol)</b>             |           |                        |               |
| Hydrogen                            | 0.2730             | Hydrogen                            | 0.2730    | 0.2730                 | 0.00          |
| Methane                             | 0.0921             | Methane                             | 0.0921    | 0.0921                 | 0.00          |
| Ethane                              | 0.0007             | Ethane                              | 0.0007    | 0.0007                 | 0.00          |
| Propadiene                          | 0.0000             | Propadiene/Methylacetylene          | 0.0000    | 0.0000                 |               |
| Propene                             | 0.6324             | Propylene                           | 0.6324    | 0.6324                 | 0.00          |
| Propane                             | 0.0019             | Propane                             | 0.0019    | 0.0019                 | 0.00          |
| 13-Butadiene                        | 0.0000             | Butadienes/C4Acetylenes             | 0.0000    | 0.0000                 |               |
| 1-Butene                            | 0.0000             | Butylenes                           | 0.0000    | 0.0000                 |               |
| n-Butane                            | 0.0000             | Butanes                             | 0.0000    | 0.0000                 |               |
| Nitrogen                            | 0.0000             | Nitrogen                            | 0.0000    | 0.0000                 |               |
| <b>Operation Condition</b>          | 0                  | <b>Operation Condition</b>          |           | 0                      |               |
| Temperature (°C)                    | 20.58              | Temperature (°C)                    | 20.58     | 20.58                  | 0.00          |
| Pressure (Kg/cm <sup>2</sup> gauge) | 17.43              | Pressure (Kg/cm <sup>2</sup> gauge) | 17.43     | 17.43                  | 0.00          |
| Molar Flow (kgmole/h)               | 21.98              | Molar Flow (kgmole/h)               | 21.98     | 21.98                  | 0.00          |
| Mass Flow (kg/h)                    | 631.88             | Mass Flow (kg/h)                    | 631.88    | 631.88                 | 0.00          |
| Molecular Weight                    | 28.7430            | Molecular Weight                    | 28.7430   | 28.74                  | 0.00          |
| Total                               | 1.0000             | Total                               | 1.0000    | 1.0000                 |               |
| <b>Variable</b>                     | <b>Integration</b> | <b>4502</b>                         |           | <b>Unit Simulation</b> | <b>%Error</b> |
| <b>Component (%mol)</b>             |                    | <b>Component (%mol)</b>             |           |                        |               |
| Hydrogen                            | 0.0000             | Hydrogen                            | 0.0000    | 0.0000                 |               |
| Methane                             | 0.0000             | Methane                             | 0.0000    | 0.0000                 |               |
| Ethane                              | 0.0000             | Ethane                              | 0.0000    | 0.0000                 |               |
| Propadiene                          | 0.0000             | Propadiene/Methylacetylene          | 0.0000    | 0.0000                 |               |
| Propene                             | 0.9950             | Propylene                           | 0.9950    | 0.9950                 | 0.00          |
| Propane                             | 0.0049             | Propane                             | 0.0049    | 0.0049                 | 0.00          |
| 13-Butadiene                        | 0.0000             | Butadienes/C4Acetylenes             | 0.0000    | 0.0000                 |               |
| 1-Butene                            | 0.0000             | Butylenes                           | 0.0000    | 0.0000                 |               |
| n-Butane                            | 0.0000             | Butanes                             | 0.0000    | 0.0000                 |               |
| Nitrogen                            | 0.0000             | Nitrogen                            | 0.0000    | 0.0000                 |               |
| <b>Operation Condition</b>          | 0                  | <b>Operation Condition</b>          |           | 0                      |               |
| Temperature (°C)                    | 45.84              | Temperature (°C)                    | 45.84     | 45.84                  | 0.00          |

# Simulation Report – ECC 860 KTA

## Working Stage 6

|                                     |                    |                                     |          |                        |               |
|-------------------------------------|--------------------|-------------------------------------|----------|------------------------|---------------|
| Pressure (Kg/cm <sup>2</sup> gauge) | 18.38              | Pressure (Kg/cm <sup>2</sup> gauge) | 18.38    | 18.38                  | 0.00          |
| Molar Flow (kgmole/h)               | 883.65             | Molar Flow (kgmole/h)               | 883.65   | 883.65                 | 0.00          |
| Mass Flow (kg/h)                    | 37192.20           | Mass Flow (kg/h)                    | 37192.20 | 37192.20               | 0.00          |
| Molecular Weight                    | 42.0891            | Molecular Weight                    | 42.0891  | 42.09                  | 0.00          |
| Total                               | 1.0000             | Total                               | 1.0000   | 1.0000                 |               |
| <b>Variable</b>                     | <b>Integration</b> | <b>4522</b>                         |          | <b>Unit Simulation</b> | <b>%Error</b> |
| <b>Component (%mol)</b>             |                    | <b>Component (%mol)</b>             |          |                        |               |
| Hydrogen                            | 0.0191             | Hydrogen                            | 0.0191   | 0.0191                 | 0.00          |
| Methane                             | 0.0514             | Methane                             | 0.0514   | 0.0514                 | 0.00          |
| Ethane                              | 0.0007             | Ethane                              | 0.0007   | 0.0007                 | 0.00          |
| Propadiene                          | 0.0000             | Propadiene/Methylacetylene          | 0.0000   | 0.0000                 |               |
| Propene                             | 0.9259             | Propylene                           | 0.9259   | 0.9259                 | 0.00          |
| Propane                             | 0.0029             | Propane                             | 0.0029   | 0.0029                 | 0.00          |
| 13-Butadiene                        | 0.0000             | Butadienes/C4Acetylenes             | 0.0000   | 0.0000                 |               |
| 1-Butene                            | 0.0000             | Butylenes                           | 0.0000   | 0.0000                 |               |
| n-Butane                            | 0.0000             | Butanes                             | 0.0000   | 0.0000                 |               |
| Nitrogen                            | 0.0000             | Nitrogen                            | 0.0000   | 0.0000                 |               |
| <b>Operation Condition</b>          | <b>0</b>           | <b>Operation Condition</b>          |          | <b>0</b>               |               |
| Temperature (°C)                    | 12.89              | Temperature (°C)                    | 12.89    | 12.89                  | 0.00          |
| Pressure (Kg/cm <sup>2</sup> gauge) | 9.47               | Pressure (Kg/cm <sup>2</sup> gauge) | 9.47     | 9.47                   | 0.00          |
| Molar Flow (kgmole/h)               | 21.98              | Molar Flow (kgmole/h)               | 21.98    | 21.98                  | 0.00          |
| Mass Flow (kg/h)                    | 631.88             | Mass Flow (kg/h)                    | 631.88   | 631.88                 | 0.00          |
| Molecular Weight                    | 28.7430            | Molecular Weight                    | 28.7430  | 28.74                  | 0.00          |
| Total                               | 1.0000             | Total                               | 1.0000   | 1.0000                 |               |
| <b>Variable</b>                     | <b>Integration</b> | <b>4535</b>                         |          | <b>Unit Simulation</b> | <b>%Error</b> |
| <b>Component (%mol)</b>             |                    | <b>Component (%mol)</b>             |          |                        |               |
| Hydrogen                            | 0.0000             | Hydrogen                            | 0.0000   | 0.0000                 |               |
| Methane                             | 0.0000             | Methane                             | 0.0000   | 0.0000                 |               |
| Ethane                              | 0.0000             | Ethane                              | 0.0000   | 0.0000                 |               |
| Propadiene                          | 0.0000             | Propadiene/Methylacetylene          | 0.0000   | 0.0000                 |               |
| Propene                             | 0.9950             | Propylene                           | 0.9950   | 0.9950                 | 0.00          |
| Propane                             | 0.0049             | Propane                             | 0.0049   | 0.0049                 | 0.00          |
| 13-Butadiene                        | 0.0000             | Butadienes/C4Acetylenes             | 0.0000   | 0.0000                 |               |
| 1-Butene                            | 0.0000             | Butylenes                           | 0.0000   | 0.0000                 |               |
| n-Butane                            | 0.0000             | Butanes                             | 0.0000   | 0.0000                 |               |
| Nitrogen                            | 0.0000             | Nitrogen                            | 0.0000   | 0.0000                 |               |
| <b>Operation Condition</b>          | <b>0</b>           | <b>Operation Condition</b>          |          | <b>0</b>               |               |
| Temperature (°C)                    | -24.00             | Temperature (°C)                    | -24.00   | -24.00                 | 0.00          |
| Pressure (Kg/cm <sup>2</sup> gauge) | 21.63              | Pressure (Kg/cm <sup>2</sup> gauge) | 21.63    | 21.63                  | 0.00          |
| Molar Flow (kgmole/h)               | 299.36             | Molar Flow (kgmole/h)               | 299.36   | 299.36                 | 0.00          |
| Mass Flow (kg/h)                    | 12600.00           | Mass Flow (kg/h)                    | 12600.00 | 12600.00               | 0.00          |
| Molecular Weight                    | 42.0891            | Molecular Weight                    | 42.0891  | 42.09                  | 0.00          |
| Total                               | 1.0000             | Total                               | 1.0000   | 1.0000                 |               |

# Simulation Report – ECC 860 KTA

## Working Stage 6

| Variable                            | Integration | 4503                                |          | Unit Simulation | %Error |
|-------------------------------------|-------------|-------------------------------------|----------|-----------------|--------|
| Component (%mol)                    |             | Component (%mol)                    |          |                 |        |
| Hydrogen                            | 0.0000      | Hydrogen                            | 0.0000   | 0.0000          |        |
| Methane                             | 0.0000      | Methane                             | 0.0000   | 0.0000          |        |
| Ethane                              | 0.0000      | Ethane                              | 0.0000   | 0.0000          |        |
| Propadiene                          | 0.0000      | Propadiene/Methylacetylene          | 0.0000   | 0.0000          |        |
| Propene                             | 0.9950      | Propylene                           | 0.9950   | 0.9950          | 0.00   |
| Propane                             | 0.0049      | Propane                             | 0.0049   | 0.0049          | 0.00   |
| 13-Butadiene                        | 0.0000      | Butadienes/C4Acetylenes             | 0.0000   | 0.0000          |        |
| 1-Butene                            | 0.0000      | Butylenes                           | 0.0000   | 0.0000          |        |
| n-Butane                            | 0.0000      | Butanes                             | 0.0000   | 0.0000          |        |
| Nitrogen                            | 0.0000      | Nitrogen                            | 0.0000   | 0.0000          |        |
| Operation Condition                 | 0           | Operation Condition                 |          | 0               |        |
| Temperature (°C)                    | 39.68       | Temperature (°C)                    | 39.68    | 39.68           | 0.00   |
| Pressure (Kg/cm <sup>2</sup> gauge) | 17.00       | Pressure (Kg/cm <sup>2</sup> gauge) | 17.00    | 17.00           | 0.00   |
| Molar Flow (kgmole/h)               | 584.29      | Molar Flow (kgmole/h)               | 584.29   | 584.29          | 0.00   |
| Mass Flow (kg/h)                    | 24592.20    | Mass Flow (kg/h)                    | 24592.20 | 24592.20        | 0.00   |
| Molecular Weight                    | 42.0891     | Molecular Weight                    | 42.0891  | 42.09           | 0.00   |
| Total                               | 1.0000      | Total                               | 1.0000   | 1.0000          |        |
| Variable                            | Integration | 4511                                |          | Unit Simulation | %Error |
| Component (%mol)                    |             | Component (%mol)                    |          |                 |        |
| Hydrogen                            | 0.0000      | Hydrogen                            | 0.0000   | 0.0000          |        |
| Methane                             | 0.0000      | Methane                             | 0.0000   | 0.0000          |        |
| Ethane                              | 0.0000      | Ethane                              | 0.0000   | 0.0000          |        |
| Propadiene                          | 0.0043      | Propadiene/Methylacetylene          | 0.0043   | 0.0043          | -0.01  |
| Propene                             | 0.0430      | Propylene                           | 0.0430   | 0.0430          | 0.02   |
| Propane                             | 0.9184      | Propane                             | 0.9184   | 0.9184          | 0.00   |
| 13-Butadiene                        | 0.0021      | Butadienes/C4Acetylenes             | 0.0021   | 0.0021          | -0.01  |
| 1-Butene                            | 0.0322      | Butylenes                           | 0.0322   | 0.0321          | -0.01  |
| n-Butane                            | 0.0000      | Butanes                             | 0.0000   | 0.0000          |        |
| Nitrogen                            | 0.0000      | Nitrogen                            | 0.0000   | 0.0000          |        |
| Operation Condition                 | 0           | Operation Condition                 |          | 0               |        |
| Temperature (°C)                    | 58.23       | Temperature (°C)                    | 58.23    | 58.23           | 0.00   |
| Pressure (Kg/cm <sup>2</sup> gauge) | 19.70       | Pressure (Kg/cm <sup>2</sup> gauge) | 19.70    | 19.70           | 0.00   |
| Molar Flow (kgmole/h)               | 44.35       | Molar Flow (kgmole/h)               | 44.35    | 44.36           | 0.01   |
| Mass Flow (kg/h)                    | 1969.24     | Mass Flow (kg/h)                    | 1969.24  | 1969.50         | 0.01   |
| Molecular Weight                    | 44.4006     | Molecular Weight                    | 44.4006  | 44.40           | 0.00   |
| Total                               | 1.0000      | Total                               | 1.0000   | 1.0000          |        |
| Variable                            | Integration | 4520                                |          | Unit Simulation | %Error |
| Component (%mol)                    |             | Component (%mol)                    |          |                 |        |
| Hydrogen                            | 0.0000      | Hydrogen                            | 0.0000   | 0.0000          |        |
| Methane                             | 0.0000      | Methane                             | 0.0000   | 0.0000          |        |
| Ethane                              | 0.0000      | Ethane                              | 0.0000   | 0.0000          |        |



# Simulation Report – ECC 860 KTA

## Working Stage 6

|                                     |                    |                                     |           |                        |               |
|-------------------------------------|--------------------|-------------------------------------|-----------|------------------------|---------------|
| Propadiene                          | 0.0001             | Propadiene/Methylacetylene          | 0.0001    | 0.0001                 | 0.00          |
| Propene                             | 0.9019             | Propylene                           | 0.9019    | 0.9019                 | 0.00          |
| Propane                             | 0.0978             | Propane                             | 0.0978    | 0.0978                 | 0.00          |
| 13-Butadiene                        | 0.0000             | Butadienes/C4Acetylenes             | 0.0000    | 0.0000                 |               |
| 1-Butene                            | 0.0001             | Butylenes                           | 0.0001    | 0.0001                 | 0.00          |
| n-Butane                            | 0.0000             | Butanes                             | 0.0000    | 0.0000                 |               |
| Nitrogen                            | 0.0000             | Nitrogen                            | 0.0000    | 0.0000                 |               |
| <b>Operation Condition</b>          | 0                  | <b>Operation Condition</b>          |           | 0                      |               |
| Temperature (°C)                    | 48.73              | Temperature (°C)                    | 48.73     | 48.73                  | 0.00          |
| Pressure (Kg/cm <sup>2</sup> gauge) | 19.34              | Pressure (Kg/cm <sup>2</sup> gauge) | 19.34     | 19.34                  | 0.00          |
| Molar Flow (kgmole/h)               | 7506.18            | Molar Flow (kgmole/h)               | 7506.18   | 7506.18                | 0.00          |
| Mass Flow (kg/h)                    | 317359.06          | Mass Flow (kg/h)                    | 317359.06 | 317359.06              | 0.00          |
| Molecular Weight                    | 42.2797            | Molecular Weight                    | 42.2797   | 42.28                  | 0.00          |
| Total                               | 1.0000             | Total                               | 1.0000    | 1.0000                 |               |
| <b>Variable</b>                     | <b>Integration</b> | <b>4505</b>                         |           | <b>Unit Simulation</b> | <b>%Error</b> |
| <b>Component (%mol)</b>             |                    | <b>Component (%mol)</b>             |           |                        |               |
| Hydrogen                            | 0.0012             | Hydrogen                            | 0.0012    | 0.0012                 | 0.00          |
| Methane                             | 0.0022             | Methane                             | 0.0022    | 0.0022                 | 0.00          |
| Ethane                              | 0.0002             | Ethane                              | 0.0002    | 0.0002                 | 0.00          |
| Propadiene                          | 0.0000             | Propadiene/Methylacetylene          | 0.0000    | 0.0000                 |               |
| Propene                             | 0.9928             | Propylene                           | 0.9928    | 0.9928                 | 0.00          |
| Propane                             | 0.0036             | Propane                             | 0.0036    | 0.0036                 | 0.00          |
| 13-Butadiene                        | 0.0000             | Butadienes/C4Acetylenes             | 0.0000    | 0.0000                 |               |
| 1-Butene                            | 0.0000             | Butylenes                           | 0.0000    | 0.0000                 |               |
| n-Butane                            | 0.0000             | Butanes                             | 0.0000    | 0.0000                 |               |
| Nitrogen                            | 0.0000             | Nitrogen                            | 0.0000    | 0.0000                 |               |
| <b>Operation Condition</b>          | 0                  | <b>Operation Condition</b>          |           | 0                      |               |
| Temperature (°C)                    | 42.23              | Temperature (°C)                    | 42.23     | 42.23                  | 0.00          |
| Pressure (Kg/cm <sup>2</sup> gauge) | 17.98              | Pressure (Kg/cm <sup>2</sup> gauge) | 17.98     | 17.98                  | 0.00          |
| Molar Flow (kgmole/h)               | 11047.88           | Molar Flow (kgmole/h)               | 11047.88  | 11047.88               | 0.00          |
| Mass Flow (kg/h)                    | 463775.98          | Mass Flow (kg/h)                    | 463775.98 | 463775.98              | 0.00          |
| Molecular Weight                    | 41.9787            | Molecular Weight                    | 41.9787   | 41.98                  | 0.00          |
| Total                               | 1.0000             | Total                               | 1.0000    | 1.0000                 |               |
| <b>Variable</b>                     | <b>Integration</b> | <b>4515</b>                         |           | <b>Unit Simulation</b> | <b>%Error</b> |
| <b>Component (%mol)</b>             |                    | <b>Component (%mol)</b>             |           |                        |               |
| Hydrogen                            | 0.0255             | Hydrogen                            | 0.0255    | 0.0255                 | 0.00          |
| Methane                             | 0.0166             | Methane                             | 0.0166    | 0.0166                 | 0.00          |
| Ethane                              | 0.0004             | Ethane                              | 0.0004    | 0.0004                 | 0.00          |
| Propadiene                          | 0.0000             | Propadiene/Methylacetylene          | 0.0000    | 0.0000                 |               |
| Propene                             | 0.9543             | Propylene                           | 0.9543    | 0.9543                 | 0.00          |
| Propane                             | 0.0031             | Propane                             | 0.0031    | 0.0031                 | 0.00          |
| 13-Butadiene                        | 0.0000             | Butadienes/C4Acetylenes             | 0.0000    | 0.0000                 |               |
| 1-Butene                            | 0.0000             | Butylenes                           | 0.0000    | 0.0000                 |               |

# Simulation Report – ECC 860 KTA

## Working Stage 6

|                                     |                    |                                     |           |                        |               |
|-------------------------------------|--------------------|-------------------------------------|-----------|------------------------|---------------|
| n-Butane                            | 0.0000             | Butanes                             | 0.0000    | 0.0000                 |               |
| Nitrogen                            | 0.0000             | Nitrogen                            | 0.0000    | 0.0000                 |               |
| <b>Operation Condition</b>          | 0                  | <b>Operation Condition</b>          |           | 0                      |               |
| Temperature (°C)                    | 40.98              | Temperature (°C)                    | 40.98     | 40.98                  | 0.00          |
| Pressure (Kg/cm <sup>2</sup> gauge) | 17.43              | Pressure (Kg/cm <sup>2</sup> gauge) | 17.43     | 17.43                  | 0.00          |
| Molar Flow (kgmole/h)               | 284.45             | Molar Flow (kgmole/h)               | 284.45    | 284.45                 | 0.00          |
| Mass Flow (kg/h)                    | 11556.22           | Mass Flow (kg/h)                    | 11556.22  | 11556.22               | 0.00          |
| Molecular Weight                    | 40.6259            | Molecular Weight                    | 40.6259   | 40.63                  | 0.00          |
| Total                               | 1.0000             | Total                               | 1.0000    | 1.0000                 |               |
| <b>Variable</b>                     | <b>Integration</b> | <b>4518</b>                         |           | <b>Unit Simulation</b> | <b>%Error</b> |
| <b>Component (%mol)</b>             |                    | <b>Component (%mol)</b>             |           |                        |               |
| Hydrogen                            | 0.0000             | Hydrogen                            | 0.0000    | 0.0000                 |               |
| Methane                             | 0.0000             | Methane                             | 0.0000    | 0.0000                 |               |
| Ethane                              | 0.0000             | Ethane                              | 0.0000    | 0.0000                 |               |
| Propadiene                          | 0.0001             | Propadiene/Methylacetylene          | 0.0001    | 0.0001                 | 0.00          |
| Propene                             | 0.8969             | Propylene                           | 0.8969    | 0.8969                 | 0.00          |
| Propane                             | 0.1026             | Propane                             | 0.1026    | 0.1026                 | 0.00          |
| 13-Butadiene                        | 0.0000             | Butadienes/C4Acetylenes             | 0.0000    | 0.0000                 |               |
| 1-Butene                            | 0.0003             | Butylenes                           | 0.0003    | 0.0003                 | 0.00          |
| n-Butane                            | 0.0000             | Butanes                             | 0.0000    | 0.0000                 |               |
| Nitrogen                            | 0.0000             | Nitrogen                            | 0.0000    | 0.0000                 |               |
| <b>Operation Condition</b>          | 0                  | <b>Operation Condition</b>          |           | 0                      |               |
| Temperature (°C)                    | 48.53              | Temperature (°C)                    | 48.53     | 48.53                  | 0.00          |
| Pressure (Kg/cm <sup>2</sup> gauge) | 19.26              | Pressure (Kg/cm <sup>2</sup> gauge) | 19.26     | 19.26                  | 0.00          |
| Molar Flow (kgmole/h)               | 7552.79            | Molar Flow (kgmole/h)               | 7552.79   | 7552.79                | 0.00          |
| Mass Flow (kg/h)                    | 319423.78          | Mass Flow (kg/h)                    | 319423.78 | 319423.78              | 0.00          |
| Molecular Weight                    | 42.2922            | Molecular Weight                    | 42.2922   | 42.29                  | 0.00          |
| Total                               | 1.0000             | Total                               | 1.0000    | 1.0000                 |               |
| <b>Variable</b>                     | <b>Integration</b> | <b>4532</b>                         |           | <b>Unit Simulation</b> | <b>%Error</b> |
| <b>Component (%mol)</b>             |                    | <b>Component (%mol)</b>             |           |                        |               |
| Hydrogen                            | 0.2725             | Hydrogen                            | 0.2725    | 0.2725                 | 0.00          |
| Methane                             | 0.0937             | Methane                             | 0.0937    | 0.0937                 | 0.00          |
| Ethane                              | 0.0007             | Ethane                              | 0.0007    | 0.0007                 | 0.00          |
| Propadiene                          | 0.0000             | Propadiene/Methylacetylene          | 0.0000    | 0.0000                 |               |
| Propene                             | 0.6312             | Propylene                           | 0.6312    | 0.6312                 | 0.00          |
| Propane                             | 0.0019             | Propane                             | 0.0019    | 0.0019                 | 0.00          |
| 13-Butadiene                        | 0.0000             | Butadienes/C4Acetylenes             | 0.0000    | 0.0000                 |               |
| 1-Butene                            | 0.0000             | Butylenes                           | 0.0000    | 0.0000                 |               |
| n-Butane                            | 0.0000             | Butanes                             | 0.0000    | 0.0000                 |               |
| Nitrogen                            | 0.0000             | Nitrogen                            | 0.0000    | 0.0000                 |               |
| <b>Operation Condition</b>          | 0                  | <b>Operation Condition</b>          |           | 0                      |               |
| Temperature (°C)                    | 11.97              | Temperature (°C)                    | 11.97     | 11.97                  | 0.00          |
| Pressure (Kg/cm <sup>2</sup> gauge) | 9.47               | Pressure (Kg/cm <sup>2</sup> gauge) | 9.47      | 9.47                   | 0.00          |

# Simulation Report – ECC 860 KTA

## Working Stage 6

|                                     |                    |                                     |          |                        |               |
|-------------------------------------|--------------------|-------------------------------------|----------|------------------------|---------------|
| Molar Flow (kgmole/h)               | 32.17              | Molar Flow (kgmole/h)               | 32.17    | 32.17                  | 0.00          |
| Mass Flow (kg/h)                    | 923.88             | Mass Flow (kg/h)                    | 923.88   | 923.88                 | 0.00          |
| Molecular Weight                    | 28.7171            | Molecular Weight                    | 28.7171  | 28.72                  | 0.00          |
| Total                               | 1.0000             | Total                               | 1.0000   | 1.0000                 |               |
| <b>Variable</b>                     | <b>Integration</b> | <b>4536</b>                         |          | <b>Unit Simulation</b> | <b>%Error</b> |
| <b>Component (%mol)</b>             |                    | <b>Component (%mol)</b>             |          |                        |               |
| Hydrogen                            | 0.0000             | Hydrogen                            | 0.0000   | 0.0000                 |               |
| Methane                             | 0.0000             | Methane                             | 0.0000   | 0.0000                 |               |
| Ethane                              | 0.0000             | Ethane                              | 0.0000   | 0.0000                 |               |
| Propadiene                          | 0.0000             | Propadiene/Methylacetylene          | 0.0000   | 0.0000                 |               |
| Propene                             | 0.9950             | Propylene                           | 0.9950   | 0.9950                 | 0.00          |
| Propane                             | 0.0049             | Propane                             | 0.0049   | 0.0049                 | 0.00          |
| 13-Butadiene                        | 0.0000             | Butadienes/C4Acetylenes             | 0.0000   | 0.0000                 |               |
| 1-Butene                            | 0.0000             | Butylenes                           | 0.0000   | 0.0000                 |               |
| n-Butane                            | 0.0000             | Butanes                             | 0.0000   | 0.0000                 |               |
| Nitrogen                            | 0.0000             | Nitrogen                            | 0.0000   | 0.0000                 |               |
| <b>Operation Condition</b>          | <b>0</b>           | <b>Operation Condition</b>          |          | <b>0</b>               |               |
| Temperature (°C)                    | -37.00             | Temperature (°C)                    | -37.00   | -37.00                 | 0.00          |
| Pressure (Kg/cm <sup>2</sup> gauge) | 5.00               | Pressure (Kg/cm <sup>2</sup> gauge) | 5.00     | 5.00                   | 0.00          |
| Molar Flow (kgmole/h)               | 299.36             | Molar Flow (kgmole/h)               | 299.36   | 299.36                 | 0.00          |
| Mass Flow (kg/h)                    | 12600.00           | Mass Flow (kg/h)                    | 12600.00 | 12600.00               | 0.00          |
| Molecular Weight                    | 42.0891            | Molecular Weight                    | 42.0891  | 42.09                  | 0.00          |
| Total                               | 1.0000             | Total                               | 1.0000   | 1.0000                 |               |
| <b>Variable</b>                     | <b>Integration</b> | <b>4533</b>                         |          | <b>Unit Simulation</b> | <b>%Error</b> |
| <b>Component (%mol)</b>             |                    | <b>Component (%mol)</b>             |          |                        |               |
| Hydrogen                            | 0.0000             | Hydrogen                            | 0.0000   | 0.0000                 |               |
| Methane                             | 0.0000             | Methane                             | 0.0000   | 0.0000                 |               |
| Ethane                              | 0.0000             | Ethane                              | 0.0000   | 0.0000                 |               |
| Propadiene                          | 0.0000             | Propadiene/Methylacetylene          | 0.0000   | 0.0000                 |               |
| Propene                             | 0.9950             | Propylene                           | 0.9950   | 0.9950                 | 0.00          |
| Propane                             | 0.0049             | Propane                             | 0.0049   | 0.0049                 | 0.00          |
| 13-Butadiene                        | 0.0000             | Butadienes/C4Acetylenes             | 0.0000   | 0.0000                 |               |
| 1-Butene                            | 0.0000             | Butylenes                           | 0.0000   | 0.0000                 |               |
| n-Butane                            | 0.0000             | Butanes                             | 0.0000   | 0.0000                 |               |
| Nitrogen                            | 0.0000             | Nitrogen                            | 0.0000   | 0.0000                 |               |
| <b>Operation Condition</b>          | <b>0</b>           | <b>Operation Condition</b>          |          | <b>0</b>               |               |
| Temperature (°C)                    | 39.81              | Temperature (°C)                    | 39.81    | 39.81                  | 0.00          |
| Pressure (Kg/cm <sup>2</sup> gauge) | 17.00              | Pressure (Kg/cm <sup>2</sup> gauge) | 17.00    | 17.00                  | 0.00          |
| Molar Flow (kgmole/h)               | 992.62             | Molar Flow (kgmole/h)               | 992.62   | 992.62                 | 0.00          |
| Mass Flow (kg/h)                    | 41779.20           | Mass Flow (kg/h)                    | 41779.20 | 41779.20               | 0.00          |
| Molecular Weight                    | 42.0897            | Molecular Weight                    | 42.0897  | 42.09                  | 0.00          |
| Total                               | 1.0000             | Total                               | 1.0000   | 1.0000                 |               |
| <b>Variable</b>                     | <b>Integration</b> | <b>4520</b>                         |          | <b>Unit Simulation</b> | <b>%Error</b> |

# Simulation Report – ECC 860 KTA

## Working Stage 6

| Component (%mol)                    |                    | Component (%mol)                    |           |                        |               |
|-------------------------------------|--------------------|-------------------------------------|-----------|------------------------|---------------|
| Hydrogen                            | 0.0000             | Hydrogen                            | 0.0000    | 0.0000                 |               |
| Methane                             | 0.0000             | Methane                             | 0.0000    | 0.0000                 |               |
| Ethane                              | 0.0000             | Ethane                              | 0.0000    | 0.0000                 |               |
| Propadiene                          | 0.0001             | Propadiene/Methylacetylene          | 0.0001    | 0.0001                 | 0.00          |
| Propene                             | 0.9019             | Propylene                           | 0.9019    | 0.9019                 | 0.00          |
| Propane                             | 0.0978             | Propane                             | 0.0978    | 0.0978                 | 0.00          |
| 13-Butadiene                        | 0.0000             | Butadienes/C4Acetylenes             | 0.0000    | 0.0000                 |               |
| 1-Butene                            | 0.0001             | Butylenes                           | 0.0001    | 0.0001                 | 0.00          |
| n-Butane                            | 0.0000             | Butanes                             | 0.0000    | 0.0000                 |               |
| Nitrogen                            | 0.0000             | Nitrogen                            | 0.0000    | 0.0000                 |               |
| <b>Operation Condition</b>          | 0                  | <b>Operation Condition</b>          |           | 0                      |               |
| Temperature (°C)                    | 48.73              | Temperature (°C)                    | 48.73     | 48.73                  | 0.00          |
| Pressure (Kg/cm <sup>2</sup> gauge) | 19.34              | Pressure (Kg/cm <sup>2</sup> gauge) | 19.34     | 19.34                  | 0.00          |
| Molar Flow (kgmole/h)               | 7508.431664        | Molar Flow (kgmole/h)               | 7508.43   | 7506.18                | -0.03         |
| Mass Flow (kg/h)                    | 317454.2829        | Mass Flow (kg/h)                    | 317454.28 | 317359.06              | -0.03         |
| Molecular Weight                    | 42.2797            | Molecular Weight                    | 42.2797   | 42.28                  | 0.00          |
| Total                               | 1.0000             | Total                               | 1.0000    | 1.0000                 |               |
| <b>Variable</b>                     | <b>Integration</b> | <b>4508</b>                         |           | <b>Unit Simulation</b> | <b>%Error</b> |
| <b>Component (%mol)</b>             |                    | <b>Component (%mol)</b>             |           |                        |               |
| Hydrogen                            | 0.0007             | Hydrogen                            | 0.0007    | 0.0007                 | 0.00          |
| Methane                             | 0.0020             | Methane                             | 0.0020    | 0.0020                 | 0.00          |
| Ethane                              | 0.0002             | Ethane                              | 0.0002    | 0.0002                 | 0.00          |
| Propadiene                          | 0.0000             | Propadiene/Methylacetylene          | 0.0000    | 0.0000                 |               |
| Propene                             | 0.9935             | Propylene                           | 0.9935    | 0.9935                 | 0.00          |
| Propane                             | 0.0036             | Propane                             | 0.0036    | 0.0036                 | 0.00          |
| 13-Butadiene                        | 0.0000             | Butadienes/C4Acetylenes             | 0.0000    | 0.0000                 |               |
| 1-Butene                            | 0.0000             | Butylenes                           | 0.0000    | 0.0000                 |               |
| n-Butane                            | 0.0000             | Butanes                             | 0.0000    | 0.0000                 |               |
| Nitrogen                            | 0.0000             | Nitrogen                            | 0.0000    | 0.0000                 |               |
| <b>Operation Condition</b>          | 0                  | <b>Operation Condition</b>          |           | 0                      |               |
| Temperature (°C)                    | 41.27              | Temperature (°C)                    | 41.27     | 41.27                  | 0.00          |
| Pressure (Kg/cm <sup>2</sup> gauge) | 18.33              | Pressure (Kg/cm <sup>2</sup> gauge) | 18.33     | 18.33                  | 0.00          |
| Molar Flow (kgmole/h)               | 11026.21           | Molar Flow (kgmole/h)               | 11026.21  | 11026.21               | 0.00          |
| Mass Flow (kg/h)                    | 463159.92          | Mass Flow (kg/h)                    | 463159.92 | 463159.92              | 0.00          |
| Molecular Weight                    | 42.0053            | Molecular Weight                    | 42.0053   | 42.01                  | 0.00          |
| Total                               | 1.0000             | Total                               | 1.0000    | 1.0000                 |               |
| <b>Variable</b>                     | <b>Integration</b> | <b>4523</b>                         |           | <b>Unit Simulation</b> | <b>%Error</b> |
| <b>Component (%mol)</b>             |                    | <b>Component (%mol)</b>             |           |                        |               |
| Hydrogen                            | 0.0048             | Hydrogen                            | 0.0048    | 0.0048                 | 0.00          |
| Methane                             | 0.0103             | Methane                             | 0.0103    | 0.0103                 | 0.00          |
| Ethane                              | 0.0004             | Ethane                              | 0.0004    | 0.0004                 | 0.00          |
| Propadiene                          | 0.0000             | Propadiene/Methylacetylene          | 0.0000    | 0.0000                 |               |

# Simulation Report – ECC 860 KTA

## Working Stage 6

|                                     |                    |                                     |           |                        |               |
|-------------------------------------|--------------------|-------------------------------------|-----------|------------------------|---------------|
| Propene                             | 0.9812             | Propylene                           | 0.9812    | 0.9812                 | 0.00          |
| Propane                             | 0.0032             | Propane                             | 0.0032    | 0.0032                 | 0.00          |
| 13-Butadiene                        | 0.0000             | Butadienes/C4Acetylenes             | 0.0000    | 0.0000                 |               |
| 1-Butene                            | 0.0000             | Butylenes                           | 0.0000    | 0.0000                 |               |
| n-Butane                            | 0.0000             | Butanes                             | 0.0000    | 0.0000                 |               |
| Nitrogen                            | 0.0000             | Nitrogen                            | 0.0000    | 0.0000                 |               |
| <b>Operation Condition</b>          | 0                  | <b>Operation Condition</b>          |           | 0                      |               |
| Temperature (°C)                    | 20.51              | Temperature (°C)                    | 20.51     | 20.51                  | 0.00          |
| Pressure (Kg/cm <sup>2</sup> gauge) | 17.43              | Pressure (Kg/cm <sup>2</sup> gauge) | 17.43     | 17.43                  | 0.00          |
| Molar Flow (kgmole/h)               | 262.06             | Molar Flow (kgmole/h)               | 262.06    | 262.06                 | 0.00          |
| Mass Flow (kg/h)                    | 10906.97           | Mass Flow (kg/h)                    | 10906.97  | 10906.97               | 0.00          |
| Molecular Weight                    | 41.6204            | Molecular Weight                    | 41.6204   | 41.62                  | 0.00          |
| Total                               | 1.0000             | Total                               | 1.0000    | 1.0000                 |               |
| <b>Variable</b>                     | <b>Integration</b> | <b>4506</b>                         |           | <b>Unit Simulation</b> | <b>%Error</b> |
| <b>Component (%mol)</b>             |                    | <b>Component (%mol)</b>             |           |                        |               |
| Hydrogen                            | 0.0007             | Hydrogen                            | 0.0007    | 0.0007                 | 0.00          |
| Methane                             | 0.0020             | Methane                             | 0.0020    | 0.0020                 | 0.00          |
| Ethane                              | 0.0002             | Ethane                              | 0.0002    | 0.0002                 | 0.00          |
| Propadiene                          | 0.0000             | Propadiene/Methylacetylene          | 0.0000    | 0.0000                 |               |
| Propene                             | 0.9935             | Propylene                           | 0.9935    | 0.9935                 | 0.00          |
| Propane                             | 0.0036             | Propane                             | 0.0036    | 0.0036                 | 0.00          |
| 13-Butadiene                        | 0.0000             | Butadienes/C4Acetylenes             | 0.0000    | 0.0000                 |               |
| 1-Butene                            | 0.0000             | Butylenes                           | 0.0000    | 0.0000                 |               |
| n-Butane                            | 0.0000             | Butanes                             | 0.0000    | 0.0000                 |               |
| Nitrogen                            | 0.0000             | Nitrogen                            | 0.0000    | 0.0000                 |               |
| <b>Operation Condition</b>          | 0                  | <b>Operation Condition</b>          |           | 0                      |               |
| Temperature (°C)                    | 40.98              | Temperature (°C)                    | 40.98     | 40.98                  | 0.00          |
| Pressure (Kg/cm <sup>2</sup> gauge) | 17.43              | Pressure (Kg/cm <sup>2</sup> gauge) | 17.43     | 17.43                  | 0.00          |
| Molar Flow (kgmole/h)               | 11025.49           | Molar Flow (kgmole/h)               | 11025.49  | 11025.49               | 0.00          |
| Mass Flow (kg/h)                    | 463126.73          | Mass Flow (kg/h)                    | 463126.73 | 463126.73              | 0.00          |
| Molecular Weight                    | 42.0051            | Molecular Weight                    | 42.0051   | 42.01                  | 0.00          |
| Total                               | 1.0000             | Total                               | 1.0000    | 1.0000                 |               |
| <b>Variable</b>                     | <b>Integration</b> | <b>4572</b>                         |           | <b>Unit Simulation</b> | <b>%Error</b> |
| <b>Component (%mol)</b>             |                    | <b>Component (%mol)</b>             |           |                        |               |
| Hydrogen                            | 0.2716             | Hydrogen                            | 0.2716    | 0.2716                 | 0.00          |
| Methane                             | 0.0972             | Methane                             | 0.0972    | 0.0972                 | 0.00          |
| Ethane                              | 0.0008             | Ethane                              | 0.0008    | 0.0008                 | 0.00          |
| Propadiene                          | 0.0000             | Propadiene/Methylacetylene          | 0.0000    | 0.0000                 |               |
| Propene                             | 0.6285             | Propylene                           | 0.6285    | 0.6285                 | 0.00          |
| Propane                             | 0.0019             | Propane                             | 0.0019    | 0.0019                 | 0.00          |
| 13-Butadiene                        | 0.0000             | Butadienes/C4Acetylenes             | 0.0000    | 0.0000                 |               |
| 1-Butene                            | 0.0000             | Butylenes                           | 0.0000    | 0.0000                 |               |
| n-Butane                            | 0.0000             | Butanes                             | 0.0000    | 0.0000                 |               |

# Simulation Report – ECC 860 KTA

## Working Stage 6

|                                     |                    |                                     |          |                        |               |
|-------------------------------------|--------------------|-------------------------------------|----------|------------------------|---------------|
| Nitrogen                            | 0.0000             | Nitrogen                            | 0.0000   | 0.0000                 |               |
| <b>Operation Condition</b>          | 0                  | <b>Operation Condition</b>          |          | 0                      |               |
| Temperature (°C)                    | 10.00              | Temperature (°C)                    | 10.00    | 10.00                  | 0.00          |
| Pressure (Kg/cm <sup>2</sup> gauge) | 9.47               | Pressure (Kg/cm <sup>2</sup> gauge) | 9.47     | 9.47                   | 0.00          |
| Molar Flow (kgmole/h)               | 10.19              | Molar Flow (kgmole/h)               | 10.19    | 10.19                  | 0.00          |
| Mass Flow (kg/h)                    | 292.00             | Mass Flow (kg/h)                    | 292.00   | 292.00                 | 0.00          |
| Molecular Weight                    | 28.6611            | Molecular Weight                    | 28.6611  | 28.66                  | 0.00          |
| Total                               | 1.0000             | Total                               | 1.0000   | 1.0000                 |               |
| <b>Variable</b>                     | <b>Integration</b> | <b>4534</b>                         |          | <b>Unit Simulation</b> | <b>%Error</b> |
| <b>Component (%mol)</b>             |                    | <b>Component (%mol)</b>             |          |                        |               |
| Hydrogen                            | 0.0000             | Hydrogen                            | 0.0000   | 0.0000                 |               |
| Methane                             | 0.0000             | Methane                             | 0.0000   | 0.0000                 |               |
| Ethane                              | 0.0000             | Ethane                              | 0.0000   | 0.0000                 |               |
| Propadiene                          | 0.0000             | Propadiene/Methylacetylene          | 0.0000   | 0.0000                 |               |
| Propene                             | 0.9950             | Propylene                           | 0.9950   | 0.9950                 | 0.00          |
| Propane                             | 0.0049             | Propane                             | 0.0049   | 0.0049                 | 0.00          |
| 13-Butadiene                        | 0.0000             | Butadienes/C4Acetylenes             | 0.0000   | 0.0000                 |               |
| 1-Butene                            | 0.0000             | Butylenes                           | 0.0000   | 0.0000                 |               |
| n-Butane                            | 0.0000             | Butanes                             | 0.0000   | 0.0000                 |               |
| Nitrogen                            | 0.0000             | Nitrogen                            | 0.0000   | 0.0000                 |               |
| <b>Operation Condition</b>          | 0                  | <b>Operation Condition</b>          |          | 0                      |               |
| Temperature (°C)                    | 40.00              | Temperature (°C)                    | 40.00    | 40.00                  | 0.00          |
| Pressure (Kg/cm <sup>2</sup> gauge) | 22.04              | Pressure (Kg/cm <sup>2</sup> gauge) | 22.04    | 22.04                  | 0.00          |
| Molar Flow (kgmole/h)               | 299.36             | Molar Flow (kgmole/h)               | 299.36   | 299.36                 | 0.00          |
| Mass Flow (kg/h)                    | 12600.00           | Mass Flow (kg/h)                    | 12600.00 | 12600.00               | 0.00          |
| Molecular Weight                    | 42.0891            | Molecular Weight                    | 42.0891  | 42.09                  | 0.00          |
| Total                               | 1.0000             | Total                               | 1.0000   | 1.0000                 |               |
| <b>Variable</b>                     | <b>Integration</b> | <b>4553</b>                         |          | <b>Unit Simulation</b> | <b>%Error</b> |
| <b>Component (%mol)</b>             |                    | <b>Component (%mol)</b>             |          |                        |               |
| Hydrogen                            | 0.0000             | Hydrogen                            | 0.0000   | 0.0000                 |               |
| Methane                             | 0.0000             | Methane                             | 0.0000   | 0.0000                 |               |
| Ethane                              | 0.0000             | Ethane                              | 0.0000   | 0.0000                 |               |
| Propadiene                          | 0.0000             | Propadiene/Methylacetylene          | 0.0000   | 0.0000                 |               |
| Propene                             | 0.9951             | Propylene                           | 0.9951   | 0.9951                 | 0.00          |
| Propane                             | 0.0049             | Propane                             | 0.0049   | 0.0049                 | 0.00          |
| 13-Butadiene                        | 0.0000             | Butadienes/C4Acetylenes             | 0.0000   | 0.0000                 |               |
| 1-Butene                            | 0.0000             | Butylenes                           | 0.0000   | 0.0000                 |               |
| n-Butane                            | 0.0000             | Butanes                             | 0.0000   | 0.0000                 |               |
| Nitrogen                            | 0.0000             | Nitrogen                            | 0.0000   | 0.0000                 |               |
| <b>Operation Condition</b>          | 0                  | <b>Operation Condition</b>          |          | 0                      |               |
| Temperature (°C)                    | 40.00              | Temperature (°C)                    | 40.00    | 40.00                  | 0.00          |
| Pressure (Kg/cm <sup>2</sup> gauge) | 17.00              | Pressure (Kg/cm <sup>2</sup> gauge) | 17.00    | 17.00                  | 0.00          |
| Molar Flow (kgmole/h)               | 408.33             | Molar Flow (kgmole/h)               | 408.33   | 408.33                 | 0.00          |

**Simulation Report – ECC 860 KTA**  
**Working Stage 6**

|                                     |                    |                                     |           |                        |               |
|-------------------------------------|--------------------|-------------------------------------|-----------|------------------------|---------------|
| Mass Flow (kg/h)                    | 17187.00           | Mass Flow (kg/h)                    | 17187.00  | 17187.00               | 0.00          |
| Molecular Weight                    | 42.0905            | Molecular Weight                    | 42.0905   | 42.09                  | 0.00          |
| Total                               | 1.0000             | Total                               | 1.0000    | 1.0000                 |               |
| <b>Variable</b>                     | <b>Integration</b> | <b>4519</b>                         |           | <b>Unit Simulation</b> | <b>%Error</b> |
| <b>Component (%mol)</b>             |                    | <b>Component (%mol)</b>             |           |                        |               |
| Hydrogen                            | 0.0000             | Hydrogen                            | 0.0000    | 0.0000                 |               |
| Methane                             | 0.0000             | Methane                             | 0.0000    | 0.0000                 |               |
| Ethane                              | 0.0000             | Ethane                              | 0.0000    | 0.0000                 |               |
| Propadiene                          | 0.0001             | Propadiene/Methylacetylene          | 0.0001    | 0.0001                 | 0.00          |
| Propene                             | 0.8969             | Propylene                           | 0.8969    | 0.8969                 | 0.00          |
| Propane                             | 0.1026             | Propane                             | 0.1026    | 0.1026                 | 0.00          |
| 13-Butadiene                        | 0.0000             | Butadienes/C4Acetylenes             | 0.0000    | 0.0000                 |               |
| 1-Butene                            | 0.0003             | Butylenes                           | 0.0003    | 0.0003                 | 0.00          |
| n-Butane                            | 0.0000             | Butanes                             | 0.0000    | 0.0000                 |               |
| Nitrogen                            | 0.0000             | Nitrogen                            | 0.0000    | 0.0000                 |               |
| <b>Operation Condition</b>          | <b>0</b>           | <b>Operation Condition</b>          |           | <b>0</b>               |               |
| Temperature (°C)                    | 48.62              | Temperature (°C)                    | 48.62     | 48.62                  | 0.00          |
| Pressure (Kg/cm <sup>2</sup> gauge) | 19.34              | Pressure (Kg/cm <sup>2</sup> gauge) | 19.34     | 19.34                  | 0.00          |
| Molar Flow (kgmole/h)               | 7552.79            | Molar Flow (kgmole/h)               | 7552.79   | 7552.79                | 0.00          |
| Mass Flow (kg/h)                    | 319423.78          | Mass Flow (kg/h)                    | 319423.78 | 319423.78              | 0.00          |
| Molecular Weight                    | 42.2922            | Molecular Weight                    | 42.2922   | 42.29                  | 0.00          |
| Total                               | 1.0000             | Total                               | 1.0000    | 1.0000                 |               |
| <b>Variable</b>                     | <b>Integration</b> | <b>4512</b>                         |           | <b>Unit Simulation</b> | <b>%Error</b> |
| <b>Component (%mol)</b>             |                    | <b>Component (%mol)</b>             |           |                        |               |
| Hydrogen                            | 0.0000             | Hydrogen                            | 0.0000    | 0.0000                 |               |
| Methane                             | 0.0000             | Methane                             | 0.0000    | 0.0000                 |               |
| Ethane                              | 0.0000             | Ethane                              | 0.0000    | 0.0000                 |               |
| Propadiene                          | 0.0043             | Propadiene/Methylacetylene          | 0.0043    | 0.0043                 | -0.01         |
| Propene                             | 0.0430             | Propylene                           | 0.0430    | 0.0430                 | 0.02          |
| Propane                             | 0.9184             | Propane                             | 0.9184    | 0.9184                 | 0.00          |
| 13-Butadiene                        | 0.0021             | Butadienes/C4Acetylenes             | 0.0021    | 0.0021                 | -0.01         |
| 1-Butene                            | 0.0322             | Butylenes                           | 0.0322    | 0.0321                 | -0.01         |
| n-Butane                            | 0.0000             | Butanes                             | 0.0000    | 0.0000                 |               |
| Nitrogen                            | 0.0000             | Nitrogen                            | 0.0000    | 0.0000                 |               |
| <b>Operation Condition</b>          | <b>0</b>           | <b>Operation Condition</b>          |           | <b>0</b>               |               |
| Temperature (°C)                    | 16.49              | Temperature (°C)                    | 16.49     | 16.49                  | 0.00          |
| Pressure (Kg/cm <sup>2</sup> gauge) | 6.61               | Pressure (Kg/cm <sup>2</sup> gauge) | 6.61      | 6.61                   | 0.00          |
| Molar Flow (kgmole/h)               | 44.357586          | Molar Flow (kgmole/h)               | 44.36     | 44.36                  | 0.00          |
| Mass Flow (kg/h)                    | 1969.50209         | Mass Flow (kg/h)                    | 1969.50   | 1969.50                | 0.00          |
| Molecular Weight                    | 44.4006            | Molecular Weight                    | 44.4006   | 44.40                  | 0.00          |
| Total                               | 1.0000             | Total                               | 1.0000    | 1.0000                 |               |

**Table A.4.6. Depropanation No.3 Stream Compositions**

**Simulation Report – ECC 860 KTA**  
**Working Stage 6**

| Variable                            | Integration | 4208                                |          | Unit Simulation | %Error |
|-------------------------------------|-------------|-------------------------------------|----------|-----------------|--------|
| Component (%mol)                    |             | Component (%mol)                    |          |                 |        |
| Hydrogen                            | 0.0000      | Hydrogen                            | 0.0000   | 0.0000          |        |
| Methane                             | 0.0000      | Methane                             | 0.0000   | 0.0000          |        |
| Ethane                              | 0.0000      | Ethane                              | 0.0000   | 0.0000          |        |
| Propadiene                          | 0.0293      | Propadiene                          | 0.0293   | 0.0293          | 0.00   |
| M-Acetylene                         | 0.0000      | M-Acetylene                         | 0.0000   | 0.0000          |        |
| Propene                             | 0.7110      | Propene                             | 0.7110   | 0.7110          | 0.00   |
| Cyclopropane                        | 0.0000      | Cyclopropane                        | 0.0000   | 0.0000          |        |
| Propane                             | 0.0214      | Propane                             | 0.0214   | 0.0214          | 0.00   |
| 13-Butadiene                        | 0.0779      | 13-Butadiene                        | 0.0779   | 0.0779          | 0.00   |
| 1-Butene                            | 0.1112      | 1-Butene                            | 0.1112   | 0.1112          | 0.00   |
| i-Butene                            | 0.0000      | i-Butene                            | 0.0000   | 0.0000          |        |
| n-Butane                            | 0.0350      | n-Butane                            | 0.0350   | 0.0350          | 0.00   |
| i-Pentane                           | 0.0126      | i-Pentane                           | 0.0126   | 0.0126          | 0.00   |
| 1-Hexyne                            | 0.0003      | 1-Hexyne                            | 0.0003   | 0.0003          | 0.00   |
| 1-Heptyne                           | 0.0000      | 1-Heptyne                           | 0.0000   | 0.0000          |        |
| 1-Octyne                            | 0.0000      | 1-Octyne                            | 0.0000   | 0.0000          |        |
| Benzene                             | 0.0013      | Benzene                             | 0.0013   | 0.0013          | 0.00   |
| Toluene                             | 0.0000      | Toluene                             | 0.0000   | 0.0000          |        |
| p-Xylene                            | 0.0000      | p-Xylene                            | 0.0000   | 0.0000          |        |
| E-Benzene                           | 0.0000      | E-Benzene                           | 0.0000   | 0.0000          |        |
| Styrene                             | 0.0000      | Styrene                             | 0.0000   | 0.0000          |        |
| n-Nonane                            | 0.0000      | n-Nonane                            | 0.0000   | 0.0000          |        |
| H2O                                 | 0.0000      | H2O                                 | 0.0000   | 0.0000          |        |
| Nitrogen                            | 0.0000      | Nitrogen                            | 0.0000   | 0.0000          |        |
| <b>Operation Condition</b>          | 0           | <b>Operation Condition</b>          |          |                 |        |
| Temperature (°C)                    | 54.80       | Temperature (°C)                    | 54.80    | 54.80           | 0.00   |
| Pressure (Kg/cm <sup>2</sup> gauge) | 16.96       | Pressure (Kg/cm <sup>2</sup> gauge) | 16.96    | 16.96           | 0.00   |
| Molar Flow (kgmole/h)               | 1610.06     | Molar Flow (kgmole/h)               | 1610.06  | 1610.06         | 0.00   |
| Mass Flow (kg/h)                    | 73354.00    | Mass Flow (kg/h)                    | 73354.00 | 73354.00        | 0.00   |
| Molecular Weight                    | 45.5598     | Molecular Weight                    | 45.56    | 45.56           | 0.00   |
| Total                               |             | Total                               | 1.0000   | 1.0000          |        |
| Variable                            | Integration | 4408                                |          | Unit Simulation | %Error |
| Component (%mol)                    |             | Component (%mol)                    |          |                 |        |
| Hydrogen                            | 0.0002      | Hydrogen                            | 0.0002   | 0.0002          | 0.00   |
| Methane                             | 0.0003      | Methane                             | 0.0003   | 0.0003          | 0.00   |
| Ethane                              | 0.0000      | Ethane                              | 0.0000   | 0.0000          |        |
| Propadiene                          | 0.0197      | Propadiene                          | 0.0197   | 0.0197          | 0.00   |
| M-Acetylene                         | 0.0000      | M-Acetylene                         | 0.0000   | 0.0000          |        |
| Propene                             | 0.9389      | Propene                             | 0.9389   | 0.9389          | 0.00   |
| Cyclopropane                        | 0.0000      | Cyclopropane                        | 0.0000   | 0.0000          |        |
| Propane                             | 0.0399      | Propane                             | 0.0399   | 0.0399          | 0.00   |



# Simulation Report – ECC 860 KTA

## Working Stage 6

|                                     |                    |                                     |           |                        |               |
|-------------------------------------|--------------------|-------------------------------------|-----------|------------------------|---------------|
| 13-Butadiene                        | 0.0001             | 13-Butadiene                        | 0.0001    | 0.0001                 | 0.00          |
| 1-Butene                            | 0.0008             | 1-Butene                            | 0.0008    | 0.0008                 | 0.00          |
| i-Butene                            | 0.0000             | i-Butene                            | 0.0000    | 0.0000                 |               |
| n-Butane                            | 0.0000             | n-Butane                            | 0.0000    | 0.0000                 |               |
| i-Pentane                           | 0.0000             | i-Pentane                           | 0.0000    | 0.0000                 |               |
| 1-Hexyne                            | 0.0000             | 1-Hexyne                            | 0.0000    | 0.0000                 |               |
| 1-Heptyne                           | 0.0000             | 1-Heptyne                           | 0.0000    | 0.0000                 |               |
| 1-Octyne                            | 0.0000             | 1-Octyne                            | 0.0000    | 0.0000                 |               |
| Benzene                             | 0.0000             | Benzene                             | 0.0000    | 0.0000                 |               |
| Toluene                             | 0.0000             | Toluene                             | 0.0000    | 0.0000                 |               |
| p-Xylene                            | 0.0000             | p-Xylene                            | 0.0000    | 0.0000                 |               |
| E-Benzene                           | 0.0000             | E-Benzene                           | 0.0000    | 0.0000                 |               |
| Styrene                             | 0.0000             | Styrene                             | 0.0000    | 0.0000                 |               |
| n-Nonane                            | 0.0000             | n-Nonane                            | 0.0000    | 0.0000                 |               |
| H2O                                 | 0.0001             | H2O                                 | 0.0001    | 0.0001                 | 0.00          |
| Nitrogen                            | 0.0000             | Nitrogen                            | 0.0000    | 0.0000                 |               |
| <b>Operation Condition</b>          | 0                  | <b>Operation Condition</b>          |           |                        |               |
| Temperature (°C)                    | 41.79              | Temperature (°C)                    | 41.79     | 41.79                  | 0.00          |
| Pressure (Kg/cm <sup>2</sup> gauge) | 27.72              | Pressure (Kg/cm <sup>2</sup> gauge) | 27.72     | 27.72                  | 0.00          |
| Molar Flow (kgmole/h)               | 2582.98            | Molar Flow (kgmole/h)               | 2582.98   | 2582.98                | 0.00          |
| Mass Flow (kg/h)                    | 108781.64          | Mass Flow (kg/h)                    | 108781.64 | 108781.60              | 0.00          |
| Molecular Weight                    | 42.1148            | Molecular Weight                    | 42.11     | 42.11                  | 0.00          |
| Total                               |                    | Total                               | 0.9999    | 0.9999                 |               |
| <b>Variable</b>                     | <b>Integration</b> | <b>4411</b>                         |           | <b>Unit Simulation</b> | <b>%Error</b> |
| <b>Component (%mol)</b>             |                    | <b>Component (%mol)</b>             |           |                        |               |
| Hydrogen                            | 0.0000             | Hydrogen                            | 0.0000    | 0.0000                 |               |
| Methane                             | 0.0000             | Methane                             | 0.0000    | 0.0000                 |               |
| Ethane                              | 0.0000             | Ethane                              | 0.0000    | 0.0000                 |               |
| Propadiene                          | 0.0666             | Propadiene                          | 0.0666    | 0.0666                 | 0.00          |
| M-Acetylene                         | 0.0000             | M-Acetylene                         | 0.0000    | 0.0000                 |               |
| Propene                             | 0.1911             | Propene                             | 0.1911    | 0.1911                 | 0.00          |
| Cyclopropane                        | 0.0000             | Cyclopropane                        | 0.0000    | 0.0000                 |               |
| Propane                             | 0.0201             | Propane                             | 0.0201    | 0.0201                 | 0.00          |
| 13-Butadiene                        | 0.2410             | 13-Butadiene                        | 0.2410    | 0.2410                 | 0.00          |
| 1-Butene                            | 0.3570             | 1-Butene                            | 0.3570    | 0.3570                 | 0.00          |
| i-Butene                            | 0.0000             | i-Butene                            | 0.0000    | 0.0000                 |               |
| n-Butane                            | 0.0966             | n-Butane                            | 0.0966    | 0.0966                 | 0.00          |
| i-Pentane                           | 0.0248             | i-Pentane                           | 0.0248    | 0.0248                 | 0.00          |
| 1-Hexyne                            | 0.0006             | 1-Hexyne                            | 0.0006    | 0.0006                 | 0.00          |
| 1-Heptyne                           | 0.0000             | 1-Heptyne                           | 0.0000    | 0.0000                 | 0.00          |
| 1-Octyne                            | 0.0000             | 1-Octyne                            | 0.0000    | 0.0000                 | 0.00          |
| Benzene                             | 0.0023             | Benzene                             | 0.0023    | 0.0023                 | 0.00          |
| Toluene                             | 0.0000             | Toluene                             | 0.0000    | 0.0000                 | 0.00          |
| p-Xylene                            | 0.0000             | p-Xylene                            | 0.0000    | 0.0000                 |               |

# Simulation Report – ECC 860 KTA

## Working Stage 6

|                                     |                    |                                     |          |                        |               |
|-------------------------------------|--------------------|-------------------------------------|----------|------------------------|---------------|
| E-Benzene                           | 0.0000             | E-Benzene                           | 0.0000   | 0.0000                 |               |
| Styrene                             | 0.0000             | Styrene                             | 0.0000   | 0.0000                 | 0.00          |
| n-Nonane                            | 0.0000             | n-Nonane                            | 0.0000   | 0.0000                 |               |
| H2O                                 | 0.0000             | H2O                                 | 0.0000   | 0.0000                 | 0.00          |
| Nitrogen                            | 0.0000             | Nitrogen                            | 0.0000   | 0.0000                 |               |
| <b>Operation Condition</b>          | 0                  | <b>Operation Condition</b>          |          |                        |               |
| Temperature (°C)                    | 41.64              | Temperature (°C)                    | 41.64    | 41.64                  | 0.00          |
| Pressure (Kg/cm <sup>2</sup> gauge) | 6.10               | Pressure (Kg/cm <sup>2</sup> gauge) | 6.10     | 6.10                   | 0.00          |
| Molar Flow (kgmole/h)               | 1018.09            | Molar Flow (kgmole/h)               | 1018.09  | 1018.09                | 0.00          |
| Mass Flow (kg/h)                    | 53236.70           | Mass Flow (kg/h)                    | 53236.70 | 53236.75               | 0.00          |
| Molecular Weight                    | 52.2906            | Molecular Weight                    | 52.29    | 52.29                  | 0.00          |
| Total                               |                    | Total                               | 1.0000   | 1.0000                 |               |
| <b>Variable</b>                     | <b>Integration</b> | <b>4422</b>                         |          | <b>Unit Simulation</b> | <b>%Error</b> |
| <b>Component (%mol)</b>             |                    | <b>Component (%mol)</b>             |          |                        |               |
| Hydrogen                            | 0.0000             | Hydrogen                            | 0.0000   | 0.0000                 |               |
| Hydrogen                            | 0.0000             | Methane                             | 0.0000   | 0.0000                 |               |
| Methane                             | 0.0000             | Ethane                              | 0.0000   | 0.0000                 |               |
| Ethane                              | 0.0903             | Propadiene                          | 0.0903   | 0.0906                 | 0.33          |
| Propadiene                          | 0.0000             | M-Acetylene                         | 0.0000   | 0.0000                 |               |
| M-Acetylene                         | 0.4309             | Propene                             | 0.4309   | 0.4303                 | -0.13         |
| Propene                             | 0.0000             | Cyclopropane                        | 0.0000   | 0.0000                 |               |
| Cyclopropane                        | 0.0339             | Propane                             | 0.0339   | 0.0339                 | -0.09         |
| Propane                             | 0.1518             | 13-Butadiene                        | 0.1518   | 0.1521                 | 0.20          |
| 13-Butadiene                        | 0.2318             | 1-Butene                            | 0.2318   | 0.2332                 | 0.59          |
| 1-Butene                            | 0.0000             | i-Butene                            | 0.0000   | 0.0000                 |               |
| i-Butene                            | 0.0538             | n-Butane                            | 0.0538   | 0.0529                 | -1.68         |
| n-Butane                            | 0.0068             | i-Pentane                           | 0.0068   | 0.0063                 | -7.34         |
| i-Pentane                           | 0.0001             | 1-Hexyne                            | 0.0001   | 0.0001                 | -4.22         |
| 1-Hexyne                            | 0.0000             | 1-Heptyne                           | 0.0000   | 0.0000                 |               |
| 1-Heptyne                           | 0.0000             | 1-Octyne                            | 0.0000   | 0.0000                 |               |
| 1-Octyne                            | 0.0003             | Benzene                             | 0.0003   | 0.0003                 | -4.34         |
| Benzene                             | 0.0000             | Toluene                             | 0.0000   | 0.0000                 |               |
| Toluene                             | 0.0000             | p-Xylene                            | 0.0000   | 0.0000                 |               |
| p-Xylene                            | 0.0000             | E-Benzene                           | 0.0000   | 0.0000                 |               |
| E-Benzene                           | 0.0000             | Styrene                             | 0.0000   | 0.0000                 |               |
| Styrene                             | 0.0000             | n-Nonane                            | 0.0000   | 0.0000                 |               |
| n-Nonane                            | 0.0002             | H2O                                 | 0.0002   | 0.0002                 | -0.14         |
| H2O                                 | 0.0000             | Nitrogen                            | 0.0000   | 0.0000                 |               |
| Nitrogen                            | 0                  | <b>Operation Condition</b>          |          |                        |               |
| Temperature (°C)                    | 19.13              | Temperature (°C)                    | 19.13    | 19.13                  | 0.00          |
| Pressure (Kg/cm <sup>2</sup> gauge) | 18.35              | Pressure (Kg/cm <sup>2</sup> gauge) | 18.35    | 18.35                  | 0.00          |
| Molar Flow (kgmole/h)               | 786.833546         | Molar Flow (kgmole/h)               | 786.83   | 787.94                 | 0.14          |
| Mass Flow (kg/h)                    | 37862.34177        | Mass Flow (kg/h)                    | 37862.34 | 37910.28               | 0.13          |

**Simulation Report – ECC 860 KTA**  
**Working Stage 6**

|                                     |                    |                                     |          |                        |               |
|-------------------------------------|--------------------|-------------------------------------|----------|------------------------|---------------|
| Molecular Weight                    | 48.1200            | Molecular Weight                    | 48.12    | 48.11                  | -0.01         |
| Total                               |                    | Total                               | 0.9998   | 0.9998                 |               |
| <b>Variable</b>                     | <b>Integration</b> | <b>4458</b>                         |          | <b>Unit Simulation</b> | <b>%Error</b> |
| <b>Component (%mol)</b>             |                    | <b>Component (%mol)</b>             |          |                        |               |
| Hydrogen                            | 0.0005             | Hydrogen                            | 0.0005   | 0.0005                 | 0.00          |
| Methane                             | 0.0006             | Methane                             | 0.0006   | 0.0006                 | 0.00          |
| Ethane                              | 0.0000             | Ethane                              | 0.0000   | 0.0000                 |               |
| Propadiene                          | 0.0002             | Propadiene                          | 0.0002   | 0.0002                 | 0.00          |
| M-Acetylene                         | 0.0000             | M-Acetylene                         | 0.0000   | 0.0000                 |               |
| Propene                             | 0.9442             | Propene                             | 0.9442   | 0.9442                 | 0.00          |
| Cyclopropane                        | 0.0000             | Cyclopropane                        | 0.0000   | 0.0000                 |               |
| Propane                             | 0.0517             | Propane                             | 0.0517   | 0.0517                 | 0.00          |
| 13-Butadiene                        | 0.0002             | 13-Butadiene                        | 0.0002   | 0.0002                 | 0.00          |
| 1-Butene                            | 0.0026             | 1-Butene                            | 0.0026   | 0.0026                 | 0.00          |
| i-Butene                            | 0.0000             | i-Butene                            | 0.0000   | 0.0000                 |               |
| n-Butane                            | 0.0000             | n-Butane                            | 0.0000   | 0.0000                 |               |
| i-Pentane                           | 0.0000             | i-Pentane                           | 0.0000   | 0.0000                 |               |
| 1-Hexyne                            | 0.0000             | 1-Hexyne                            | 0.0000   | 0.0000                 |               |
| 1-Heptyne                           | 0.0000             | 1-Heptyne                           | 0.0000   | 0.0000                 |               |
| 1-Octyne                            | 0.0000             | 1-Octyne                            | 0.0000   | 0.0000                 |               |
| Benzene                             | 0.0000             | Benzene                             | 0.0000   | 0.0000                 |               |
| Toluene                             | 0.0000             | Toluene                             | 0.0000   | 0.0000                 |               |
| p-Xylene                            | 0.0000             | p-Xylene                            | 0.0000   | 0.0000                 |               |
| E-Benzene                           | 0.0000             | E-Benzene                           | 0.0000   | 0.0000                 |               |
| Styrene                             | 0.0000             | Styrene                             | 0.0000   | 0.0000                 |               |
| n-Nonane                            | 0.0000             | n-Nonane                            | 0.0000   | 0.0000                 |               |
| H2O                                 | 0.0000             | H2O                                 | 0.0000   | 0.0000                 |               |
| Nitrogen                            | 0.0000             | Nitrogen                            | 0.0000   | 0.0000                 |               |
| <b>Operation Condition</b>          | <b>0</b>           | <b>Operation Condition</b>          |          | <b>0</b>               |               |
| Temperature (°C)                    | 43.30              | Temperature (°C)                    | 43.30    | 43.30                  | 0.00          |
| Pressure (Kg/cm <sup>2</sup> gauge) | 16.71              | Pressure (Kg/cm <sup>2</sup> gauge) | 16.71    | 16.71                  | 0.00          |
| Molar Flow (kgmole/h)               | 1203.20            | Molar Flow (kgmole/h)               | 1203.20  | 1203.20                | 0.00          |
| Mass Flow (kg/h)                    | 50760.00           | Mass Flow (kg/h)                    | 50760.00 | 50760.00               | 0.00          |
| Molecular Weight                    | 42.1877            | Molecular Weight                    | 42.19    | 42.19                  | 0.00          |
| Total                               |                    | Total                               | 1.0000   | 1.0000                 |               |
| <b>Variable</b>                     | <b>Integration</b> | <b>4409</b>                         |          | <b>Unit Simulation</b> | <b>%Error</b> |
| <b>Component (%mol)</b>             |                    | <b>Component (%mol)</b>             |          |                        |               |
| Hydrogen                            | 0.0000             | Hydrogen                            | 0.0000   | 0.0000                 |               |
| Methane                             | 0.0000             | Methane                             | 0.0000   | 0.0000                 |               |
| Ethane                              | 0.0000             | Ethane                              | 0.0000   | 0.0000                 |               |
| Propadiene                          | 0.0666             | Propadiene                          | 0.0666   | 0.0666                 | 0.00          |
| M-Acetylene                         | 0.0000             | M-Acetylene                         | 0.0000   | 0.0000                 |               |
| Propene                             | 0.1911             | Propene                             | 0.1911   | 0.1911                 | 0.00          |

# Simulation Report – ECC 860 KTA

## Working Stage 6

|                                     |                    |                                     |          |                        |               |
|-------------------------------------|--------------------|-------------------------------------|----------|------------------------|---------------|
| Cyclopropane                        | 0.0000             | Cyclopropane                        | 0.0000   | 0.0000                 |               |
| Propane                             | 0.0201             | Propane                             | 0.0201   | 0.0201                 | 0.00          |
| 13-Butadiene                        | 0.2410             | 13-Butadiene                        | 0.2410   | 0.2410                 | 0.00          |
| 1-Butene                            | 0.3570             | 1-Butene                            | 0.3570   | 0.3570                 | 0.00          |
| i-Butene                            | 0.0000             | i-Butene                            | 0.0000   | 0.0000                 |               |
| n-Butane                            | 0.0966             | n-Butane                            | 0.0966   | 0.0966                 | 0.00          |
| i-Pentane                           | 0.0248             | i-Pentane                           | 0.0248   | 0.0248                 | 0.00          |
| 1-Hexyne                            | 0.0006             | 1-Hexyne                            | 0.0006   | 0.0006                 | 0.00          |
| 1-Heptyne                           | 0.0000             | 1-Heptyne                           | 0.0000   | 0.0000                 | 0.00          |
| 1-Octyne                            | 0.0000             | 1-Octyne                            | 0.0000   | 0.0000                 | 0.00          |
| Benzene                             | 0.0023             | Benzene                             | 0.0023   | 0.0023                 | 0.00          |
| Toluene                             | 0.0000             | Toluene                             | 0.0000   | 0.0000                 | 0.00          |
| p-Xylene                            | 0.0000             | p-Xylene                            | 0.0000   | 0.0000                 |               |
| E-Benzene                           | 0.0000             | E-Benzene                           | 0.0000   | 0.0000                 | #DIV/0!       |
| Styrene                             | 0.0000             | Styrene                             | 0.0000   | 0.0000                 | 0.00          |
| n-Nonane                            | 0.0000             | n-Nonane                            | 0.0000   | 0.0000                 |               |
| H2O                                 | 0.0000             | H2O                                 | 0.0000   | 0.0000                 | 0.00          |
| Nitrogen                            | 0.0000             | Nitrogen                            | 0.0000   | 0.0000                 |               |
| <b>Operation Condition</b>          | <b>0</b>           | <b>Operation Condition</b>          |          | <b>0</b>               |               |
| Temperature (°C)                    | 82.83              | Temperature (°C)                    | 82.83    | 82.83                  | 0.00          |
| Pressure (Kg/cm <sup>2</sup> gauge) | 17.12              | Pressure (Kg/cm <sup>2</sup> gauge) | 17.12    | 17.12                  | 0.00          |
| Molar Flow (kgmole/h)               | 1018.115416        | Molar Flow (kgmole/h)               | 1018.12  | 1018.09                | 0.00          |
| Mass Flow (kg/h)                    | 53236.70           | Mass Flow (kg/h)                    | 53236.70 | 53236.75               | 0.00          |
| Molecular Weight                    | 52.2906            | Molecular Weight                    | 52.29    | 52.29                  | 0.00          |
| Total                               |                    | Total                               | 1.0000   | 1.0000                 |               |
| <b>Variable</b>                     | <b>Integration</b> | <b>3206</b>                         |          | <b>Unit Simulation</b> | <b>%Error</b> |
| <b>Component (%mol)</b>             |                    | <b>Component (%mol)</b>             |          |                        |               |
| Hydrogen                            | 0.0000             | Hydrogen                            | 0.0000   | 0.0000                 |               |
| Methane                             | 0.0000             | Methane                             | 0.0000   | 0.0000                 |               |
| Ethane                              | 0.0000             | Ethane                              | 0.0000   | 0.0000                 |               |
| Propadiene                          | 3.5900             | Propadiene                          | 3.5900   | 3.5900                 | 0.00          |
| M-Acetylene                         | 0.0000             | M-Acetylene                         | 0.0000   | 0.0000                 |               |
| Propene                             | 144.5200           | Propene                             | 144.5200 | 144.5200               | 0.00          |
| Cyclopropane                        | 0.0000             | Cyclopropane                        | 0.0000   | 0.0000                 |               |
| Propane                             | 6.3000             | Propane                             | 6.3000   | 6.3000                 | 0.00          |
| 13-Butadiene                        | 121.0000           | 13-Butadiene                        | 121.0000 | 121.0000               | 0.00          |
| 1-Butene                            | 157.0000           | 1-Butene                            | 157.0000 | 157.0000               | 0.00          |
| i-Butene                            | 0.0000             | i-Butene                            | 0.0000   | 0.0000                 |               |
| n-Butane                            | 68.0000            | n-Butane                            | 68.0000  | 68.0000                | 0.00          |
| i-Pentane                           | 175.7784           | i-Pentane                           | 175.7784 | 175.7784               | 0.00          |
| 1-Hexyne                            | 56.3979            | 1-Hexyne                            | 56.3979  | 56.3979                | 0.00          |
| 1-Heptyne                           | 16.0319            | 1-Heptyne                           | 16.0319  | 16.0319                | 0.00          |
| 1-Octyne                            | 1.5268             | 1-Octyne                            | 1.5268   | 1.5268                 | 0.00          |
| Benzene                             | 163.4682           | Benzene                             | 163.4682 | 163.4682               | 0.00          |

**Simulation Report – ECC 860 KTA**  
**Working Stage 6**

|                                     |                    |                                     |          |                        |               |
|-------------------------------------|--------------------|-------------------------------------|----------|------------------------|---------------|
| Toluene                             | 37.6941            | Toluene                             | 37.6941  | 37.6941                | 0.00          |
| p-Xylene                            | 0.8589             | p-Xylene                            | 0.8589   | 0.8589                 | 0.00          |
| E-Benzene                           | 0.0000             | E-Benzene                           | 0.0000   | 0.0000                 |               |
| Styrene                             | 0.2863             | Styrene                             | 0.2863   | 0.2863                 | 0.00          |
| n-Nonane                            | 0.0000             | n-Nonane                            | 0.0000   | 0.0000                 |               |
| H2O                                 | 0.1909             | H2O                                 | 0.1909   | 0.1909                 | 0.00          |
| Nitrogen                            | 0.0000             | Nitrogen                            | 0.0000   | 0.0000                 |               |
| <b>Operation Condition</b>          | 0                  | Nitrogen                            |          | 0                      |               |
| Temperature (°C)                    | 41.00              | Temperature (°C)                    | 41.00    | 41.00                  | 0.00          |
| Pressure (Kg/cm <sup>2</sup> gauge) | 8.62               | Pressure (Kg/cm <sup>2</sup> gauge) | 8.62     | 8.62                   | 0.00          |
| Molar Flow (kgmole/h)               | 952.64             | Molar Flow (kgmole/h)               | 952.64   | 952.64                 | 0.00          |
| Mass Flow (kg/h)                    | 61201.39           | Mass Flow (kg/h)                    | 61201.39 | 61201.39               | 0.00          |
| Molecular Weight                    | 64.2438            | Molecular Weight                    | 64.24    | 64.24                  | 0.00          |
| Total                               |                    | Total                               | 952.4524 | 952.6433               |               |
| <b>Variable</b>                     | <b>Integration</b> | <b>4414</b>                         |          | <b>Unit Simulation</b> | <b>%Error</b> |
| <b>Component (%mol)</b>             |                    | <b>Component (%mol)</b>             |          |                        |               |
| Hydrogen                            | 0.0000             | Hydrogen                            | 0.0000   | 0.0000                 |               |
| Hydrogen                            | 0.0000             | Methane                             | 0.0000   | 0.0000                 |               |
| Methane                             | 0.0000             | Ethane                              | 0.0000   | 0.0000                 |               |
| Ethane                              | 0.0003             | Propadiene                          | 0.0003   | 0.0000                 |               |
| Propadiene                          | 0.0000             | M-Acetylene                         | 0.0000   | 0.0000                 |               |
| M-Acetylene                         | 0.0000             | Propene                             | 0.0000   | 0.0000                 |               |
| Propene                             | 0.0000             | Cyclopropane                        | 0.0000   | 0.0000                 |               |
| Cyclopropane                        | 0.0000             | Propane                             | 0.0000   | 0.0000                 |               |
| Propane                             | 0.2085             | 13-Butadiene                        | 0.2085   | 0.2084                 | -0.07         |
| 13-Butadiene                        | 0.2855             | 1-Butene                            | 0.2855   | 0.2847                 | -0.30         |
| 1-Butene                            | 0.0000             | i-Butene                            | 0.0000   | 0.0000                 |               |
| i-Butene                            | 0.1048             | n-Butane                            | 0.1048   | 0.1054                 | 0.61          |
| n-Butane                            | 0.1653             | i-Pentane                           | 0.1653   | 0.1658                 | 0.28          |
| i-Pentane                           | 0.0480             | 1-Hexyne                            | 0.0480   | 0.0481                 | 0.10          |
| 1-Hexyne                            | 0.0135             | 1-Heptyne                           | 0.0135   | 0.0136                 | 0.10          |
| 1-Heptyne                           | 0.0013             | 1-Octyne                            | 0.0013   | 0.0013                 | 0.10          |
| 1-Octyne                            | 0.1398             | Benzene                             | 0.1398   | 0.1400                 | 0.10          |
| Benzene                             | 0.0318             | Toluene                             | 0.0318   | 0.0319                 | 0.10          |
| Toluene                             | 0.0007             | p-Xylene                            | 0.0007   | 0.0007                 | 0.10          |
| p-Xylene                            | 0.0000             | E-Benzene                           | 0.0000   | 0.0000                 |               |
| E-Benzene                           | 0.0002             | Styrene                             | 0.0002   | 0.0002                 | 0.10          |
| Styrene                             | 0.0000             | n-Nonane                            | 0.0000   | 0.0000                 |               |
| n-Nonane                            | 0.0000             | H2O                                 | 0.0000   | 0.0000                 |               |
| H2O                                 | 0.0000             | Nitrogen                            | 0.0000   | 0.0000                 |               |
| Nitrogen                            | 0                  | <b>Operation Condition</b>          |          | 0                      |               |
| Temperature (°C)                    | 77.90              | Temperature (°C)                    | 77.90    | 77.97                  | 0.09          |
| Pressure (Kg/cm <sup>2</sup> gauge) | 6.50               | Pressure (Kg/cm <sup>2</sup> gauge) | 6.50     | 6.50                   | 0.00          |

# Simulation Report – ECC 860 KTA

## Working Stage 6

|                                     |                    |                                     |          |                        |               |
|-------------------------------------|--------------------|-------------------------------------|----------|------------------------|---------------|
| Molar Flow (kgmole/h)               | 1183.93            | Molar Flow (kgmole/h)               | 1183.93  | 1182.80                | -0.10         |
| Mass Flow (kg/h)                    | 76576.85           | Mass Flow (kg/h)                    | 76576.85 | 76527.86               | -0.06         |
| Molecular Weight                    | 64.6803            | Molecular Weight                    | 64.68    | 64.70                  | 0.03          |
| Total                               |                    | Total                               | 1.0000   | 1.0000                 |               |
| <b>Variable</b>                     | <b>Integration</b> | <b>4423</b>                         |          | <b>Unit Simulation</b> | <b>%Error</b> |
| <b>Component (%mol)</b>             |                    | <b>Component (%mol)</b>             |          |                        |               |
| Hydrogen                            | 0.0000             | Hydrogen                            | 0.0000   | 0.0000                 |               |
| Methane                             | 0.0000             | Methane                             | 0.0000   | 0.0000                 |               |
| Ethane                              | 0.0000             | Ethane                              | 0.0000   | 0.0000                 |               |
| Propadiene                          | 0.0906             | Propadiene                          | 0.0906   | 0.0906                 | 0.00          |
| M-Acetylene                         | 0.0000             | M-Acetylene                         | 0.0000   | 0.0000                 |               |
| Propene                             | 0.4304             | Propene                             | 0.4304   | 0.4304                 | 0.00          |
| Cyclopropane                        | 0.0000             | Cyclopropane                        | 0.0000   | 0.0000                 |               |
| Propane                             | 0.0339             | Propane                             | 0.0339   | 0.0339                 | 0.00          |
| 13-Butadiene                        | 0.1521             | 13-Butadiene                        | 0.1521   | 0.1521                 | 0.00          |
| 1-Butene                            | 0.2327             | 1-Butene                            | 0.2327   | 0.2327                 | 0.00          |
| i-Butene                            | 0.0000             | i-Butene                            | 0.0000   | 0.0000                 |               |
| n-Butane                            | 0.0533             | n-Butane                            | 0.0533   | 0.0533                 | 0.00          |
| i-Pentane                           | 0.0063             | i-Pentane                           | 0.0063   | 0.0063                 | 0.00          |
| 1-Hexyne                            | 0.0001             | 1-Hexyne                            | 0.0001   | 0.0001                 | 0.00          |
| 1-Heptyne                           | 0.0000             | 1-Heptyne                           | 0.0000   | 0.0000                 | 0.00          |
| 1-Octyne                            | 0.0000             | 1-Octyne                            | 0.0000   | 0.0000                 | 0.00          |
| Benzene                             | 0.0003             | Benzene                             | 0.0003   | 0.0003                 | 0.00          |
| Toluene                             | 0.0000             | Toluene                             | 0.0000   | 0.0000                 | 0.00          |
| p-Xylene                            | 0.0000             | p-Xylene                            | 0.0000   | 0.0000                 | 0.00          |
| E-Benzene                           | 0.0000             | E-Benzene                           | 0.0000   | 0.0000                 |               |
| Styrene                             | 0.0000             | Styrene                             | 0.0000   | 0.0000                 | 0.00          |
| n-Nonane                            | 0.0000             | n-Nonane                            | 0.0000   | 0.0000                 |               |
| H2O                                 | 0.0002             | H2O                                 | 0.0002   | 0.0002                 | 0.00          |
| Nitrogen                            | 0.0000             | Nitrogen                            | 0.0000   | 0.0000                 |               |
| <b>Operation Condition</b>          | <b>0</b>           | <b>Operation Condition</b>          |          |                        |               |
| Temperature (°C)                    | 57.02              | Temperature (°C)                    | 57.02    | 57.02                  | 0.00          |
| Pressure (Kg/cm <sup>2</sup> gauge) | 17.85              | Pressure (Kg/cm <sup>2</sup> gauge) | 17.85    | 17.85                  | 0.00          |
| Molar Flow (kgmole/h)               | 787.82             | Molar Flow (kgmole/h)               | 787.82   | 787.82                 | 0.00          |
| Mass Flow (kg/h)                    | 37904.35           | Mass Flow (kg/h)                    | 37904.35 | 37904.35               | 0.00          |
| Molecular Weight                    | 48.1131            | Molecular Weight                    | 48.11    | 48.11                  | 0.00          |
| Total                               |                    | Total                               | 0.9998   | 0.9998                 |               |
| <b>Variable</b>                     | <b>Integration</b> | <b>4410</b>                         |          | <b>Unit Simulation</b> | <b>%Error</b> |
| <b>Component (%mol)</b>             |                    | <b>Component (%mol)</b>             |          |                        |               |
| Hydrogen                            | 0.0000             | Hydrogen                            | 0.0000   | 0.0000                 |               |
| Methane                             | 0.0000             | Methane                             | 0.0000   | 0.0000                 |               |
| Ethane                              | 0.0000             | Ethane                              | 0.0000   | 0.0000                 |               |
| Propadiene                          | 0.0666             | Propadiene                          | 0.0666   | 0.0666                 | 0.00          |

# Simulation Report – ECC 860 KTA

## Working Stage 6

|                                     |                    |                                     |                        |               |      |
|-------------------------------------|--------------------|-------------------------------------|------------------------|---------------|------|
| M-Acetylene                         | 0.0000             | M-Acetylene                         | 0.0000                 | 0.0000        |      |
| Propene                             | 0.1911             | Propene                             | 0.1911                 | 0.1911        | 0.00 |
| Cyclopropane                        | 0.0000             | Cyclopropane                        | 0.0000                 | 0.0000        |      |
| Propane                             | 0.0201             | Propane                             | 0.0201                 | 0.0201        | 0.00 |
| 13-Butadiene                        | 0.2410             | 13-Butadiene                        | 0.2410                 | 0.2410        | 0.00 |
| 1-Butene                            | 0.3570             | 1-Butene                            | 0.3570                 | 0.3570        | 0.00 |
| i-Butene                            | 0.0000             | i-Butene                            | 0.0000                 | 0.0000        |      |
| n-Butane                            | 0.0966             | n-Butane                            | 0.0966                 | 0.0966        | 0.00 |
| i-Pentane                           | 0.0248             | i-Pentane                           | 0.0248                 | 0.0248        | 0.00 |
| 1-Hexyne                            | 0.0006             | 1-Hexyne                            | 0.0006                 | 0.0006        | 0.00 |
| 1-Heptyne                           | 0.0000             | 1-Heptyne                           | 0.0000                 | 0.0000        | 0.00 |
| 1-Octyne                            | 0.0000             | 1-Octyne                            | 0.0000                 | 0.0000        | 0.00 |
| Benzene                             | 0.0023             | Benzene                             | 0.0023                 | 0.0023        | 0.00 |
| Toluene                             | 0.0000             | Toluene                             | 0.0000                 | 0.0000        | 0.00 |
| p-Xylene                            | 0.0000             | p-Xylene                            | 0.0000                 | 0.0000        | 0.00 |
| E-Benzene                           | 0.0000             | E-Benzene                           | 0.0000                 | 0.0000        |      |
| Styrene                             | 0.0000             | Styrene                             | 0.0000                 | 0.0000        | 0.00 |
| n-Nonane                            | 0.0000             | n-Nonane                            | 0.0000                 | 0.0000        |      |
| H2O                                 | 0.0000             | H2O                                 | 0.0000                 | 0.0000        | 0.00 |
| Nitrogen                            | 0.0000             | Nitrogen                            | 0.0000                 | 0.0000        |      |
| <b>Operation Condition</b>          | 0                  | <b>Operation Condition</b>          |                        |               |      |
| Temperature (°C)                    | 58.40              | Temperature (°C)                    | 58.40                  | 58.40         | 0.00 |
| Pressure (Kg/cm <sup>2</sup> gauge) | 15.69              | Pressure (Kg/cm <sup>2</sup> gauge) | 15.69                  | 15.69         | 0.00 |
| Molar Flow (kgmole/h)               | 1018.09            | Molar Flow (kgmole/h)               | 1018.09                | 1018.09       | 0.00 |
| Mass Flow (kg/h)                    | 53236.70           | Mass Flow (kg/h)                    | 53236.70               | 53236.75      | 0.00 |
| Molecular Weight                    | 52.2906            | Molecular Weight                    | 52.29                  | 52.29         | 0.00 |
| Total                               |                    | Total                               | 1.0000                 | 1.0000        |      |
| <b>Variable</b>                     | <b>Integration</b> | <b>4413</b>                         | <b>Unit Simulation</b> | <b>%Error</b> |      |
| <b>Component (%mol)</b>             |                    | <b>Component (%mol)</b>             |                        |               |      |
| Hydrogen                            | 0.0000             | Hydrogen                            | 0.0000                 | 0.0000        |      |
| Methane                             | 0.0000             | Methane                             | 0.0000                 | 0.0000        |      |
| Ethane                              | 0.0000             | Ethane                              | 0.0000                 | 0.0000        |      |
| Propadiene                          | 0.0038             | Propadiene                          | 0.0038                 | 0.0038        | 0.00 |
| M-Acetylene                         | 0.0000             | M-Acetylene                         | 0.0000                 | 0.0000        |      |
| Propene                             | 0.1517             | Propene                             | 0.1517                 | 0.1517        | 0.00 |
| Cyclopropane                        | 0.0000             | Cyclopropane                        | 0.0000                 | 0.0000        |      |
| Propane                             | 0.0066             | Propane                             | 0.0066                 | 0.0066        | 0.00 |
| 13-Butadiene                        | 0.1270             | 13-Butadiene                        | 0.1270                 | 0.1270        | 0.00 |
| 1-Butene                            | 0.1648             | 1-Butene                            | 0.1648                 | 0.1648        | 0.00 |
| i-Butene                            | 0.0000             | i-Butene                            | 0.0000                 | 0.0000        |      |
| n-Butane                            | 0.0714             | n-Butane                            | 0.0714                 | 0.0714        | 0.00 |
| i-Pentane                           | 0.1845             | i-Pentane                           | 0.1845                 | 0.1845        | 0.00 |
| 1-Hexyne                            | 0.0592             | 1-Hexyne                            | 0.0592                 | 0.0592        | 0.00 |

**Simulation Report – ECC 860 KTA**  
**Working Stage 6**

|                                     |                    |                                     |          |                        |               |
|-------------------------------------|--------------------|-------------------------------------|----------|------------------------|---------------|
| 1-Heptyne                           | 0.0168             | 1-Heptyne                           | 0.0168   | 0.0168                 | 0.00          |
| 1-Octyne                            | 0.0016             | 1-Octyne                            | 0.0016   | 0.0016                 | 0.00          |
| Benzene                             | 0.1716             | Benzene                             | 0.1716   | 0.1716                 | 0.00          |
| Toluene                             | 0.0396             | Toluene                             | 0.0396   | 0.0396                 | 0.00          |
| p-Xylene                            | 0.0009             | p-Xylene                            | 0.0009   | 0.0009                 | 0.00          |
| E-Benzene                           | 0.0000             | E-Benzene                           | 0.0000   | 0.0000                 |               |
| Styrene                             | 0.0003             | Styrene                             | 0.0003   | 0.0003                 | 0.00          |
| n-Nonane                            | 0.0000             | n-Nonane                            | 0.0000   | 0.0000                 |               |
| H2O                                 | 0.0002             | H2O                                 | 0.0002   | 0.0002                 | 0.00          |
| Nitrogen                            | 0.0000             | Nitrogen                            | 0.0000   | 0.0000                 |               |
| <b>Operation Condition</b>          | 0                  | <b>Operation Condition</b>          |          |                        |               |
| Temperature (°C)                    | 41.07              | Temperature (°C)                    | 41.07    | 41.07                  | 0.00          |
| Pressure (Kg/cm <sup>2</sup> gauge) | 6.13               | Pressure (Kg/cm <sup>2</sup> gauge) | 6.13     | 6.13                   | 0.00          |
| Molar Flow (kgmole/h)               | 952.64             | Molar Flow (kgmole/h)               | 952.64   | 952.64                 | 0.00          |
| Mass Flow (kg/h)                    | 61201.39           | Mass Flow (kg/h)                    | 61201.39 | 61201.39               | 0.00          |
| Molecular Weight                    | 64.2438            | Molecular Weight                    | 64.24    | 64.24                  | 0.00          |
| Total                               |                    | Total                               | 0.9998   | 0.9998                 |               |
| <b>Variable</b>                     | <b>Integration</b> | <b>4601</b>                         |          | <b>Unit Simulation</b> | <b>%Error</b> |
| <b>Component (%mol)</b>             |                    | <b>Component (%mol)</b>             |          |                        |               |
| Hydrogen                            | 0.0000             | Hydrogen                            | 0.0000   | 0.0000                 |               |
| Hydrogen                            | 0.0000             | Methane                             | 0.0000   | 0.0000                 |               |
| Methane                             | 0.0000             | Ethane                              | 0.0000   | 0.0000                 |               |
| Ethane                              | 0.0003             | Propadiene                          | 0.0003   | 0.0000                 |               |
| Propadiene                          | 0.0000             | M-Acetylene                         | 0.0000   | 0.0000                 |               |
| M-Acetylene                         | 0.0000             | Propene                             | 0.0000   | 0.0000                 |               |
| Propene                             | 0.0000             | Cyclopropane                        | 0.0000   | 0.0000                 |               |
| Cyclopropane                        | 0.0000             | Propane                             | 0.0000   | 0.0000                 |               |
| Propane                             | 0.2085             | 13-Butadiene                        | 0.2085   | 0.2084                 | -0.07         |
| 13-Butadiene                        | 0.2855             | 1-Butene                            | 0.2855   | 0.2847                 | -0.30         |
| 1-Butene                            | 0.0000             | i-Butene                            | 0.0000   | 0.0000                 |               |
| i-Butene                            | 0.1048             | n-Butane                            | 0.1048   | 0.1054                 | 0.61          |
| n-Butane                            | 0.1653             | i-Pentane                           | 0.1653   | 0.1658                 | 0.28          |
| i-Pentane                           | 0.0480             | 1-Hexyne                            | 0.0480   | 0.0481                 | 0.10          |
| 1-Hexyne                            | 0.0135             | 1-Heptyne                           | 0.0135   | 0.0136                 | 0.10          |
| 1-Heptyne                           | 0.0013             | 1-Octyne                            | 0.0013   | 0.0013                 | 0.10          |
| 1-Octyne                            | 0.1398             | Benzene                             | 0.1398   | 0.1400                 | 0.10          |
| Benzene                             | 0.0318             | Toluene                             | 0.0318   | 0.0319                 | 0.10          |
| Toluene                             | 0.0007             | p-Xylene                            | 0.0007   | 0.0007                 | 0.10          |
| p-Xylene                            | 0.0000             | E-Benzene                           | 0.0000   | 0.0000                 | #DIV/0!       |
| E-Benzene                           | 0.0002             | Styrene                             | 0.0002   | 0.0002                 | 0.10          |
| Styrene                             | 0.0000             | n-Nonane                            | 0.0000   | 0.0000                 |               |
| n-Nonane                            | 0.0000             | H2O                                 | 0.0000   | 0.0000                 |               |
| H2O                                 | 0.0000             | Nitrogen                            | 0.0000   | 0.0000                 |               |



**Simulation Report – ECC 860 KTA**  
**Working Stage 6**

|                                     |          |                                     |          |          |       |
|-------------------------------------|----------|-------------------------------------|----------|----------|-------|
| Nitrogen                            | 0        | Operation Condition                 |          |          |       |
| Temperature (°C)                    | 65.60    | Temperature (°C)                    | 65.60    | 65.67    | 0.10  |
| Pressure (Kg/cm <sup>2</sup> gauge) | 4.48     | Pressure (Kg/cm <sup>2</sup> gauge) | 4.48     | 4.48     | 0.00  |
| Molar Flow (kgmole/h)               | 1183.93  | Molar Flow (kgmole/h)               | 1183.93  | 1182.80  | -0.10 |
| Mass Flow (kg/h)                    | 76576.85 | Mass Flow (kg/h)                    | 76576.85 | 76527.86 | -0.06 |
| Molecular Weight                    | 64.6803  | Molecular Weight                    | 64.68    | 64.70    | 0.03  |
| Total                               |          | Total                               | 1.0000   | 1.0000   |       |

### A.5. Stage 5

**Table A.5.1. Ethylene Refrigeration Stream Compositions**

| Variable                            | Integration | 5126                                |          | Design | %Error |
|-------------------------------------|-------------|-------------------------------------|----------|--------|--------|
| <b>Component (%mol)</b>             |             | <b>Component (%mol)</b>             |          |        |        |
| Propene                             | 1.0000      | Propylene                           | 1.0000   | 1.0000 | 0.00   |
| <b>Operation Condition</b>          |             | <b>Operation Condition</b>          |          |        |        |
| Temperature (°C)                    | -101.10     | Temperature (°C)                    | -101.10  | -101.1 | 0.00   |
| Pressure (Kg/cm <sup>2</sup> gauge) | 0.18        | Pressure (Kg/cm <sup>2</sup> gauge) | 0.18     | 0.18   | 0.00   |
| Molar Flow (kgmole/h)               | 632.96      | Molar Flow (kgmole/h)               | 632.96   | 633.2  | 0.04   |
| Mass Flow (kg/h)                    | 17756.95    | Mass Flow (kg/h)                    | 17756.95 | 17,764 | 0.04   |
| Molecular Weight                    | 28.0538     | Molecular Weight                    | 28.0538  | 28.05  | -0.01  |
| Total                               | 1.0000      | Total                               | 1.0000   | 1.0000 |        |
| Variable                            | Integration | 5134                                |          | Design | %Error |
| <b>Component (%mol)</b>             |             | <b>Component (%mol)</b>             |          |        |        |
| Propene                             | 1.0000      | Propylene                           | 1.0000   | 1.0000 | 0.00   |
| <b>Operation Condition</b>          |             | <b>Operation Condition</b>          |          |        |        |
| Temperature (°C)                    | -101.43     | Temperature (°C)                    | -101.43  | -101.3 | -0.12  |
| Pressure (Kg/cm <sup>2</sup> gauge) | 0.17        | Pressure (Kg/cm <sup>2</sup> gauge) | 0.17     | 0.17   | 0.00   |
| Molar Flow (kgmole/h)               | 277.89      | Molar Flow (kgmole/h)               | 277.89   | 277.9  | 0.00   |
| Mass Flow (kg/h)                    | 7796.00     | Mass Flow (kg/h)                    | 7796.00  | 7,796  | 0.00   |
| Molecular Weight                    | 28.0538     | Molecular Weight                    | 28.0538  | 28.05  | -0.01  |
| Total                               | 1.0000      | Total                               | 1.0000   | 1.0000 |        |
| Variable                            | Integration | 5118                                |          | Design | %Error |
| <b>Component (%mol)</b>             |             | <b>Component (%mol)</b>             |          |        |        |
| Propene                             | 1.0000      | Propylene                           | 1.0000   | 1.0000 | 0.00   |
| <b>Operation Condition</b>          |             | <b>Operation Condition</b>          |          |        |        |
| Temperature (°C)                    | -75.10      | Temperature (°C)                    | -75.10   | -75.1  | 0.01   |
| Pressure (Kg/cm <sup>2</sup> gauge) | 3.26        | Pressure (Kg/cm <sup>2</sup> gauge) | 3.26     | 3.26   | 0.00   |
| Molar Flow (kgmole/h)               | 978.83      | Molar Flow (kgmole/h)               | 978.83   | 978.8  | 0.00   |
| Mass Flow (kg/h)                    | 27460.00    | Mass Flow (kg/h)                    | 27460.00 | 27,460 | 0.00   |

**Simulation Report – ECC 860 KTA**  
**Working Stage 6**

|                                     |                    |                                     |          |               |               |
|-------------------------------------|--------------------|-------------------------------------|----------|---------------|---------------|
| Molecular Weight                    | 28.0538            | Molecular Weight                    | 28.0538  | 28.05         | -0.01         |
| Total                               | 1.0000             | Total                               | 1.0000   | 1.0000        |               |
| <b>Variable</b>                     | <b>Integration</b> | <b>5104</b>                         |          | <b>Design</b> | <b>%Error</b> |
| <b>Component (%mol)</b>             |                    | <b>Component (%mol)</b>             |          |               |               |
| Propene                             | 1.0000             | Propylene                           | 1.0000   | 1.0000        | 0.00          |
| <b>Operation Condition</b>          |                    | <b>Operation Condition</b>          |          |               |               |
| Temperature (°C)                    | 77.20              | Temperature (°C)                    | 77.20    | 77.2          | 0.00          |
| Pressure (Kg/cm <sup>2</sup> gauge) | 25.97              | Pressure (Kg/cm <sup>2</sup> gauge) | 25.97    | 25.97         | 0.00          |
| Molar Flow (kgmole/h)               | 2701.72            | Molar Flow (kgmole/h)               | 2701.72  | 2,702.00      | 0.01          |
| Mass Flow (kg/h)                    | 75793.38           | Mass Flow (kg/h)                    | 75793.38 | 75,801        | 0.01          |
| Molecular Weight                    | 28.0538            | Molecular Weight                    | 28.0538  | 28.05         | -0.01         |
| Total                               | 1.0000             | Total                               | 1.0000   | 1.0000        |               |
| <b>Variable</b>                     | <b>Integration</b> | <b>5107</b>                         |          | <b>Design</b> | <b>%Error</b> |
| <b>Component (%mol)</b>             |                    | <b>Component (%mol)</b>             |          |               |               |
| Propene                             | 1.0000             | Propylene                           | 1.0000   | 1.0000        | 0.00          |
| <b>Operation Condition</b>          |                    | <b>Operation Condition</b>          |          |               |               |
| Temperature (°C)                    | -20.00             | Temperature (°C)                    | -20.00   | -20           | 0.00          |
| Pressure (Kg/cm <sup>2</sup> gauge) | 25.35              | Pressure (Kg/cm <sup>2</sup> gauge) | 25.35    | 25.35         | 0.00          |
| Molar Flow (kgmole/h)               | 2701.72            | Molar Flow (kgmole/h)               | 2701.72  | 2,702.00      | 0.01          |
| Mass Flow (kg/h)                    | 75793.38           | Mass Flow (kg/h)                    | 75793.38 | 75,801        | 0.01          |
| Molecular Weight                    | 28.0538            | Molecular Weight                    | 28.05    | 28.05         | -0.01         |
| Total                               | 1.0000             | Total                               | 1.0000   | 1.0000        |               |
| <b>Variable</b>                     | <b>Integration</b> | <b>5113</b>                         |          | <b>Design</b> | <b>%Error</b> |
| <b>Component (%mol)</b>             |                    | <b>Component (%mol)</b>             |          |               |               |
| Propene                             | 1.0000             | Propylene                           | 1.0000   | 1.0000        | 0.00          |
| <b>Operation Condition</b>          |                    | <b>Operation Condition</b>          |          |               |               |
| Temperature (°C)                    | -72.00             | Temperature (°C)                    | -72.00   | -72           | 0.00          |
| Pressure (Kg/cm <sup>2</sup> gauge) | 25.04              | Pressure (Kg/cm <sup>2</sup> gauge) | 25.04    | 25.04         | 0.00          |
| Molar Flow (kgmole/h)               | 1426.02            | Molar Flow (kgmole/h)               | 1426.02  | 1,426.30      | 0.02          |
| Mass Flow (kg/h)                    | 40005.38           | Mass Flow (kg/h)                    | 40005.38 | 40,012        | 0.02          |
| Molecular Weight                    | 28.0538            | Molecular Weight                    | 28.0538  | 28.05         | -0.01         |
| Total                               | 1.0000             | Total                               | 1.0000   | 1.0000        |               |
| <b>Variable</b>                     | <b>Integration</b> | <b>5140</b>                         |          | <b>Design</b> | <b>%Error</b> |
| <b>Component (%mol)</b>             |                    | <b>Component (%mol)</b>             |          |               |               |
| Propene                             | 1.0000             | Propylene                           | 1.0000   | 1.0000        | 0.00          |
| <b>Operation Condition</b>          |                    | <b>Operation Condition</b>          |          |               |               |
| Temperature (°C)                    | -62.80             | Temperature (°C)                    | -62.80   | -62.8         | -0.01         |
| Pressure (Kg/cm <sup>2</sup> gauge) | 5.91               | Pressure (Kg/cm <sup>2</sup> gauge) | 5.91     | 5.91          | 0.00          |
| Molar Flow (kgmole/h)               | 136.31             | Molar Flow (kgmole/h)               | 136.31   | 136.3         | -0.01         |

**Simulation Report – ECC 860 KTA**  
**Working Stage 6**

|                                     |                    |                                     |          |               |               |
|-------------------------------------|--------------------|-------------------------------------|----------|---------------|---------------|
| Mass Flow (kg/h)                    | 3824.00            | Mass Flow (kg/h)                    | 3824.00  | 3824          | 0.00          |
| Molecular Weight                    | 28.0538            | Molecular Weight                    | 28.0538  | 28.05         | -0.01         |
| Total                               | 1.0000             | Total                               | 1.0000   | 1.0000        |               |
| <b>Variable</b>                     | <b>Integration</b> | <b>5111</b>                         |          | <b>Design</b> | <b>%Error</b> |
| <b>Component (%mol)</b>             |                    | <b>Component (%mol)</b>             |          |               |               |
| Propene                             | 1.0000             | Propylene                           | 1.0000   | 1.0000        | 0.00          |
| <b>Operation Condition</b>          |                    | <b>Operation Condition</b>          |          |               |               |
| Temperature (°C)                    | -62.80             | Temperature (°C)                    | -62.80   | -62.8         | -0.01         |
| Pressure (Kg/cm <sup>2</sup> gauge) | 5.91               | Pressure (Kg/cm <sup>2</sup> gauge) | 5.91     | 5.91          | 0.00          |
| Molar Flow (kgmole/h)               | 1078.11            | Molar Flow (kgmole/h)               | 1078.11  | 1,078.10      | 0.00          |
| Mass Flow (kg/h)                    | 30245.00           | Mass Flow (kg/h)                    | 30245.00 | 30,246        | 0.00          |
| Molecular Weight                    | 28.0538            | Molecular Weight                    | 28.0538  | 28.05         | -0.01         |
| Total                               | 1.0000             | Total                               | 1.0000   | 1.0000        |               |
| <b>Variable</b>                     | <b>Integration</b> | <b>5130</b>                         |          | <b>Design</b> | <b>%Error</b> |
| <b>Component (%mol)</b>             |                    | <b>Component (%mol)</b>             |          |               |               |
| Propene                             | 1.0000             | Propylene                           | 1.0000   | 1.0000        | 0.00          |
| <b>Operation Condition</b>          |                    | <b>Operation Condition</b>          |          |               |               |
| Temperature (°C)                    | -62.80             | Temperature (°C)                    | -62.80   | -62.8         | 0.00          |
| Pressure (Kg/cm <sup>2</sup> gauge) | 5.91               | Pressure (Kg/cm <sup>2</sup> gauge) | 5.91     | 5.91          | 0.00          |
| Molar Flow (kgmole/h)               | 61.28              | Molar Flow (kgmole/h)               | 61.28    | 61.3          | 0.04          |
| Mass Flow (kg/h)                    | 1719.00            | Mass Flow (kg/h)                    | 1719.00  | 1,719         | 0.00          |
| Molecular Weight                    | 28.0538            | Molecular Weight                    | 28.0538  | 28.05         | -0.01         |
| Total                               | 1.0000             | Total                               | 1.0000   | 1.0000        |               |
| <b>Variable</b>                     | <b>Integration</b> | <b>5103</b>                         |          | <b>Design</b> | <b>%Error</b> |
| <b>Component (%mol)</b>             |                    | <b>Component (%mol)</b>             |          |               |               |
| Propene                             | 1.0000             | Propylene                           | 1.0000   | 1.0000        | 0.00          |
| <b>Operation Condition</b>          |                    | <b>Operation Condition</b>          |          |               |               |
| Temperature (°C)                    | -62.80             | Temperature (°C)                    | -62.80   | -62.8         | 0.00          |
| Pressure (Kg/cm <sup>2</sup> gauge) | 5.91               | Pressure (Kg/cm <sup>2</sup> gauge) | 5.91     | 5.91          | 0.00          |
| Molar Flow (kgmole/h)               | 1265.07            | Molar Flow (kgmole/h)               | 1265.07  | 1,265.10      | 0.00          |
| Mass Flow (kg/h)                    | 35490.00           | Mass Flow (kg/h)                    | 35490.00 | 35,490        | 0.00          |
| Molecular Weight                    | 28.0538            | Molecular Weight                    | 28.05    | 28.05         | -0.01         |
| Total                               | 1.0000             | Total                               | 1.0000   | 1.0000        |               |
| <b>Variable</b>                     | <b>Integration</b> | <b>5117</b>                         |          | <b>Design</b> | <b>%Error</b> |
| <b>Component (%mol)</b>             |                    | <b>Component (%mol)</b>             |          |               |               |
| Propene                             | 1.0000             | Propylene                           | 1.0000   | 1.0000        | 0.00          |
| <b>Operation Condition</b>          |                    | <b>Operation Condition</b>          |          |               |               |
| Temperature (°C)                    | -71.58             | Temperature (°C)                    | -71.58   | -71.9         | 0.45          |
| Pressure (Kg/cm <sup>2</sup> gauge) | 5.91               | Pressure (Kg/cm <sup>2</sup> gauge) | 5.91     | 5.91          | 0.00          |
| Molar Flow                          | 978.83             | Molar Flow (kgmole/h)               | 978.83   | 978.8         | 0.00          |

**Simulation Report – ECC 860 KTA**  
**Working Stage 6**

|                                     |                    |                                     |          |               |               |
|-------------------------------------|--------------------|-------------------------------------|----------|---------------|---------------|
| (kgmole/h)                          |                    |                                     |          |               |               |
| Mass Flow (kg/h)                    | 27460.00           | Mass Flow (kg/h)                    | 27460.00 | 27,460        | 0.00          |
| Molecular Weight                    | 28.0538            | Molecular Weight                    | 28.0538  | 28.05         | -0.01         |
| Total                               | 1.0000             | Total                               | 1.0000   | 1.0000        |               |
| <b>Variable</b>                     | <b>Integration</b> | <b>5127</b>                         |          | <b>Design</b> | <b>%Error</b> |
| <b>Component (%mol)</b>             |                    | <b>Component (%mol)</b>             |          |               |               |
| Propene                             | 1.0000             | Propylene                           | 1.0000   | 1.0000        | 0.00          |
| <b>Operation Condition</b>          |                    | <b>Operation Condition</b>          |          |               |               |
| Temperature (°C)                    | -75.10             | Temperature (°C)                    | -75.10   | -75.1         | 0.01          |
| Pressure (Kg/cm <sup>2</sup> gauge) | 3.26               | Pressure (Kg/cm <sup>2</sup> gauge) | 3.26     | 3.26          | 0.00          |
| Molar Flow (kgmole/h)               | 457.81             | Molar Flow (kgmole/h)               | 457.81   | 458.1         | 0.06          |
| Mass Flow (kg/h)                    | 12843.38           | Mass Flow (kg/h)                    | 12843.38 | 12,850        | 0.05          |
| Molecular Weight                    | 28.0538            | Molecular Weight                    | 28.0538  | 28.05         | -0.01         |
| Total                               | 1.0000             | Total                               | 1.0000   | 1.0000        |               |
| <b>Variable</b>                     | <b>Integration</b> | <b>5119</b>                         |          | <b>Design</b> | <b>%Error</b> |
| <b>Component (%mol)</b>             |                    | <b>Component (%mol)</b>             |          |               |               |
| Propene                             | 1.0000             | Propylene                           | 1.0000   | 1.0000        | 0.00          |
| <b>Operation Condition</b>          |                    | <b>Operation Condition</b>          |          |               |               |
| Temperature (°C)                    | -75.10             | Temperature (°C)                    | -75.10   | -75.1         | 0.01          |
| Pressure (Kg/cm <sup>2</sup> gauge) | 3.26               | Pressure (Kg/cm <sup>2</sup> gauge) | 3.26     | 3.26          | 0.00          |
| Molar Flow (kgmole/h)               | 910.86             | Molar Flow (kgmole/h)               | 910.86   | 911.1         | 0.03          |
| Mass Flow (kg/h)                    | 25552.95           | Mass Flow (kg/h)                    | 25552.95 | 25,560        | 0.03          |
| Molecular Weight                    | 28.0538            | Molecular Weight                    | 28.0538  | 28.05         | -0.01         |
| Total                               | 1.0000             | Total                               | 1.0000   | 1.0000        |               |
| <b>Variable</b>                     | <b>Integration</b> | <b>5120</b>                         |          | <b>Design</b> | <b>%Error</b> |
| <b>Component (%mol)</b>             |                    | <b>Component (%mol)</b>             |          |               |               |
| Propene                             | 1.0000             | Propylene                           | 1.0000   | 1.0000        | 0.00          |
| <b>Operation Condition</b>          |                    | <b>Operation Condition</b>          |          |               |               |
| Temperature (°C)                    | -75.10             | Temperature (°C)                    | -75.10   | -75.1         | 0.01          |
| Pressure (Kg/cm <sup>2</sup> gauge) | 3.26               | Pressure (Kg/cm <sup>2</sup> gauge) | 3.26     | 3.26          | 0.00          |
| Molar Flow (kgmole/h)               | 340.34             | Molar Flow (kgmole/h)               | 340.34   | 340.6         | 0.08          |
| Mass Flow (kg/h)                    | 9547.95            | Mass Flow (kg/h)                    | 9547.95  | 9,556         | 0.08          |
| Molecular Weight                    | 28.0538            | Molecular Weight                    | 28.0538  | 28.05         | -0.01         |
| Total                               | 1.0000             | Total                               | 1.0000   | 1.0000        |               |
| <b>Variable</b>                     | <b>Integration</b> | <b>5123</b>                         |          | <b>Design</b> | <b>%Error</b> |
| <b>Component (%mol)</b>             |                    | <b>Component (%mol)</b>             |          |               |               |
| Propene                             | 1.0000             | Propylene                           | 1.0000   | 1.0000        | 0.00          |
| <b>Operation Condition</b>          |                    | <b>Operation Condition</b>          |          |               |               |
| Temperature (°C)                    | -101.10            | Temperature (°C)                    | -101.10  | -101.1        | 0.00          |
| Pressure (Kg/cm <sup>2</sup> gauge) | 0.18               | Pressure (Kg/cm <sup>2</sup> gauge) | 0.18     | 0.18          | 0.00          |

**Simulation Report – ECC 860 KTA**  
**Working Stage 6**

|                                     |                    |                                     |          |               |               |
|-------------------------------------|--------------------|-------------------------------------|----------|---------------|---------------|
| Molar Flow (kgmole/h)               | 340.34             | Molar Flow (kgmole/h)               | 340.34   | 340.6         | 0.08          |
| Mass Flow (kg/h)                    | 9547.95            | Mass Flow (kg/h)                    | 9547.95  | 9,556         | 0.08          |
| Molecular Weight                    | 28.0538            | Molecular Weight                    | 28.0538  | 28.05         | -0.01         |
| Total                               | 1.0000             | Total                               | 1.0000   | 1.0000        |               |
| <b>Variable</b>                     | <b>Integration</b> | <b>5135</b>                         |          | <b>Design</b> | <b>%Error</b> |
| <b>Component (%mol)</b>             |                    | <b>Component (%mol)</b>             |          |               |               |
| Propene                             | 1.0000             | Propylene                           | 1.0000   | 1.0000        | 0.00          |
| <b>Operation Condition</b>          |                    | <b>Operation Condition</b>          |          |               |               |
| Temperature (°C)                    | -101.42            | Temperature (°C)                    | -101.42  | -101.3        | -0.12         |
| Pressure (Kg/cm <sup>2</sup> gauge) | 0.17               | Pressure (Kg/cm <sup>2</sup> gauge) | 0.17     | 0.17          | 0.00          |
| Molar Flow (kgmole/h)               | 240.33             | Molar Flow (kgmole/h)               | 240.33   | 240.1         | -0.10         |
| Mass Flow (kg/h)                    | 6742.21            | Mass Flow (kg/h)                    | 6742.21  | 6,736         | -0.09         |
| Molecular Weight                    | 28.0538            | Molecular Weight                    | 28.0538  | 28.05         | -0.01         |
| Total                               | 1.0000             | Total                               | 1.0000   | 1.0000        |               |
| <b>Variable</b>                     | <b>Integration</b> | <b>5101</b>                         |          | <b>Design</b> | <b>%Error</b> |
| <b>Component (%mol)</b>             |                    | <b>Component (%mol)</b>             |          |               |               |
| Propene                             | 1.0000             | Propylene                           | 1.0000   | 1.0000        | 0.00          |
| <b>Operation Condition</b>          |                    | <b>Operation Condition</b>          |          |               |               |
| Temperature (°C)                    | -101.42            | Temperature (°C)                    | -101.42  | -101.3        | -0.12         |
| Pressure (Kg/cm <sup>2</sup> gauge) | 0.17               | Pressure (Kg/cm <sup>2</sup> gauge) | 0.17     | 0.17          | 0.00          |
| Molar Flow (kgmole/h)               | 910.87             | Molar Flow (kgmole/h)               | 910.87   | 911.1         | 0.03          |
| Mass Flow (kg/h)                    | 25553.38           | Mass Flow (kg/h)                    | 25553.38 | 25560         | 0.03          |
| Molecular Weight                    | 28.0538            | Molecular Weight                    | 28.0538  | 28.05         | -0.01         |
| Total                               | 1.0000             | Total                               | 1.0000   | 1.0000        |               |
| <b>Variable</b>                     | <b>Integration</b> | <b>5102</b>                         |          | <b>Design</b> | <b>%Error</b> |
| <b>Component (%mol)</b>             |                    | <b>Component (%mol)</b>             |          |               |               |
| Propene                             | 1.0000             | Propylene                           | 1.0000   | 1.0000        | 0.00          |
| <b>Operation Condition</b>          |                    | <b>Operation Condition</b>          |          |               |               |
| Temperature (°C)                    | -75.10             | Temperature (°C)                    | -75.10   | -75.1         | 0.01          |
| Pressure (Kg/cm <sup>2</sup> gauge) | 3.26               | Pressure (Kg/cm <sup>2</sup> gauge) | 3.26     | 3.26          | 0.00          |
| Molar Flow (kgmole/h)               | 525.78             | Molar Flow (kgmole/h)               | 525.78   | 525.8         | 0.00          |
| Mass Flow (kg/h)                    | 14750.00           | Mass Flow (kg/h)                    | 14750.00 | 14750         | 0.00          |
| Molecular Weight                    | 28.0538            | Molecular Weight                    | 28.0538  | 28.05         | -0.01         |
| Total                               | 1.0000             | Total                               | 1.0000   | 1.0000        |               |
| <b>Variable</b>                     | <b>Integration</b> | <b>5105</b>                         |          | <b>Design</b> | <b>%Error</b> |
| <b>Component (%mol)</b>             |                    | <b>Component (%mol)</b>             |          |               |               |
| Propene                             | 1.0000             | Propylene                           | 1.0000   | 1.0000        | 0.00          |
| <b>Operation Condition</b>          |                    | <b>Operation Condition</b>          |          |               |               |
| Temperature (°C)                    | 41.00              | Temperature (°C)                    | 41.00    | 41            | 0.00          |
| Pressure (Kg/cm <sup>2</sup>        | 25.73              | Pressure (Kg/cm <sup>2</sup> gauge) | 25.73    | 25.73         | 0.00          |

**Simulation Report – ECC 860 KTA**  
**Working Stage 6**

|                                     |                    |                                     |          |               |               |
|-------------------------------------|--------------------|-------------------------------------|----------|---------------|---------------|
| gauge)                              |                    |                                     |          |               |               |
| Molar Flow (kgmole/h)               | 2701.72            | Molar Flow (kgmole/h)               | 2701.72  | 2,702.00      | 0.01          |
| Mass Flow (kg/h)                    | 75793.38           | Mass Flow (kg/h)                    | 75793.38 | 75,801        | 0.01          |
| Molecular Weight                    | 28.0538            | Molecular Weight                    | 28.0538  | 28.05         | -0.01         |
| Total                               | 1.0000             | Total                               | 1.0000   | 1.0000        |               |
| <b>Variable</b>                     | <b>Integration</b> | <b>5108</b>                         |          | <b>Design</b> | <b>%Error</b> |
| <b>Component (%mol)</b>             |                    | <b>Component (%mol)</b>             |          |               |               |
| Propene                             | 1.0000             | Propylene                           | 1.0000   | 1.0000        | 0.00          |
| <b>Operation Condition</b>          |                    | <b>Operation Condition</b>          |          |               |               |
| Temperature (°C)                    | -20.00             | Temperature (°C)                    | -20.00   | -20           | -0.02         |
| Pressure (Kg/cm <sup>2</sup> gauge) | 25.32              | Pressure (Kg/cm <sup>2</sup> gauge) | 25.32    | 25.32         | 0.00          |
| Molar Flow (kgmole/h)               | 2701.72            | Molar Flow (kgmole/h)               | 2701.72  | 2,702.00      | 0.01          |
| Mass Flow (kg/h)                    | 75793.38           | Mass Flow (kg/h)                    | 75793.38 | 75,801        | 0.01          |
| Molecular Weight                    | 28.0538            | Molecular Weight                    | 28.0538  | 28.05         | -0.01         |
| Total                               | 1.0000             | Total                               | 1.0000   | 1.0000        |               |
| <b>Variable</b>                     | <b>Integration</b> | <b>5109</b>                         |          | <b>Design</b> | <b>%Error</b> |
| <b>Component (%mol)</b>             |                    | <b>Component (%mol)</b>             |          |               |               |
| Propene                             | 1.0000             | Propylene                           | 1.0000   | 1.0000        | 0.00          |
| <b>Operation Condition</b>          |                    | <b>Operation Condition</b>          |          |               |               |
| Temperature (°C)                    | -55.00             | Temperature (°C)                    | -55.00   | -55           | 0.00          |
| Pressure (Kg/cm <sup>2</sup> gauge) | 25.18              | Pressure (Kg/cm <sup>2</sup> gauge) | 25.18    | 25.18         | 0.00          |
| Molar Flow (kgmole/h)               | 1275.69            | Molar Flow (kgmole/h)               | 1275.69  | 1,275.70      | 0.00          |
| Mass Flow (kg/h)                    | 35788.00           | Mass Flow (kg/h)                    | 35788.00 | 35,788        | 0.00          |
| Molecular Weight                    | 28.0538            | Molecular Weight                    | 28.0538  | 28.05         | -0.01         |
| Total                               | 1.0000             | Total                               | 1.0000   | 1.0000        |               |
| <b>Variable</b>                     | <b>Integration</b> | <b>5128</b>                         |          | <b>Design</b> | <b>%Error</b> |
| <b>Component (%mol)</b>             |                    | <b>Component (%mol)</b>             |          |               |               |
| Propene                             | 1.0000             | Propylene                           | 1.0000   | 1.0000        | 0.00          |
| <b>Operation Condition</b>          |                    | <b>Operation Condition</b>          |          |               |               |
| Temperature (°C)                    | -55.00             | Temperature (°C)                    | -55.00   | -55           | 0.00          |
| Pressure (Kg/cm <sup>2</sup> gauge) | 25.18              | Pressure (Kg/cm <sup>2</sup> gauge) | 25.18    | 25.18         | 0.00          |
| Molar Flow (kgmole/h)               | 61.28              | Molar Flow (kgmole/h)               | 61.28    | 61.3          | 0.04          |
| Mass Flow (kg/h)                    | 1719.00            | Mass Flow (kg/h)                    | 1719.00  | 1,719         | 0.00          |
| Molecular Weight                    | 28.0538            | Molecular Weight                    | 28.0538  | 28.05         | -0.01         |
| Total                               | 1.0000             | Total                               | 1.0000   | 1.0000        |               |
| <b>Variable</b>                     | <b>Integration</b> | <b>5129</b>                         |          | <b>Design</b> | <b>%Error</b> |
| <b>Component (%mol)</b>             |                    | <b>Component (%mol)</b>             |          |               |               |
| Propene                             | 1.0000             | Propylene                           | 1.0000   | 1.0000        | 0.00          |
| <b>Operation Condition</b>          |                    | <b>Operation Condition</b>          |          |               |               |
| Temperature (°C)                    | -62.80             | Temperature (°C)                    | -62.80   | -62.8         | -0.01         |

**Simulation Report – ECC 860 KTA**  
**Working Stage 6**

|                                     |                    |                                     |          |               |               |
|-------------------------------------|--------------------|-------------------------------------|----------|---------------|---------------|
| Pressure (Kg/cm <sup>2</sup> gauge) | 5.91               | Pressure (Kg/cm <sup>2</sup> gauge) | 5.91     | 5.91          | 0.00          |
| Molar Flow (kgmole/h)               | 61.28              | Molar Flow (kgmole/h)               | 61.28    | 61.3          | 0.04          |
| Mass Flow (kg/h)                    | 1719.00            | Mass Flow (kg/h)                    | 1719.00  | 1,719         | 0.00          |
| Molecular Weight                    | 28.0538            | Molecular Weight                    | 28.0538  | 28.05         | -0.01         |
| Total                               | 1.0000             | Total                               | 1.0000   | 1.0000        |               |
| <b>Variable</b>                     | <b>Integration</b> | <b>5132</b>                         |          | <b>Design</b> | <b>%Error</b> |
| <b>Component (%mol)</b>             |                    | <b>Component (%mol)</b>             |          |               |               |
| Propene                             | 1.0000             | Propylene                           | 1.0000   | 1.0000        | 0.00          |
| <b>Operation Condition</b>          |                    | <b>Operation Condition</b>          |          |               |               |
| Temperature (°C)                    | -62.80             | Temperature (°C)                    | -62.80   | -62.8         | 0.00          |
| Pressure (Kg/cm <sup>2</sup> gauge) | 5.91               | Pressure (Kg/cm <sup>2</sup> gauge) | 5.91     | 5.91          | 0.00          |
| Molar Flow (kgmole/h)               | 1139.38            | Molar Flow (kgmole/h)               | 1139.38  | 1,139.40      | 0.00          |
| Mass Flow (kg/h)                    | 31964.00           | Mass Flow (kg/h)                    | 31964.00 | 31,965        | 0.00          |
| Molecular Weight                    | 28.0538            | Molecular Weight                    | 28.0538  | 28.05         | -0.01         |
| Total                               | 1.0000             | Total                               | 1.0000   | 1.0000        |               |
| <b>Variable</b>                     | <b>Integration</b> | <b>5141</b>                         |          | <b>Design</b> | <b>%Error</b> |
| <b>Component (%mol)</b>             |                    | <b>Component (%mol)</b>             |          |               |               |
| Propene                             | 1.0000             | Propylene                           | 1.0000   | 1.0000        | 0.00          |
| <b>Operation Condition</b>          |                    | <b>Operation Condition</b>          |          |               |               |
| Temperature (°C)                    | -62.80             | Temperature (°C)                    | -62.80   | -62.8         | 0.00          |
| Pressure (Kg/cm <sup>2</sup> gauge) | 5.91               | Pressure (Kg/cm <sup>2</sup> gauge) | 5.91     | 5.91          | 0.00          |
| Molar Flow (kgmole/h)               | 237.65             | Molar Flow (kgmole/h)               | 237.65   | 237.6         | -0.02         |
| Mass Flow (kg/h)                    | 6667.00            | Mass Flow (kg/h)                    | 6667.00  | 6667          | 0.00          |
| Molecular Weight                    | 28.0538            | Molecular Weight                    | 28.0538  | 28.05         | -0.01         |
| Total                               | 1.0000             | Total                               | 1.0000   | 1.0000        |               |
| <b>Variable</b>                     | <b>Integration</b> | <b>5116</b>                         |          | <b>Design</b> | <b>%Error</b> |
| <b>Component (%mol)</b>             |                    | <b>Component (%mol)</b>             |          |               |               |
| Propene                             | 1.0000             | Propylene                           | 1.0000   | 1.0000        | 0.00          |
| <b>Operation Condition</b>          |                    | <b>Operation Condition</b>          |          |               |               |
| Temperature (°C)                    | -75.10             | Temperature (°C)                    | -75.10   | -75.1         | 0.01          |
| Pressure (Kg/cm <sup>2</sup> gauge) | 3.26               | Pressure (Kg/cm <sup>2</sup> gauge) | 3.26     | 3.26          | 0.00          |
| Molar Flow (kgmole/h)               | 457.81             | Molar Flow (kgmole/h)               | 457.81   | 458.1         | 0.06          |
| Mass Flow (kg/h)                    | 12843.38           | Mass Flow (kg/h)                    | 12843.38 | 12,850        | 0.05          |
| Molecular Weight                    | 28.0538            | Molecular Weight                    | 28.0538  | 28.05         | -0.01         |
| Total                               | 1.0000             | Total                               | 1.0000   | 1.0000        |               |
| <b>Variable</b>                     | <b>Integration</b> | <b>5137</b>                         |          | <b>Design</b> | <b>%Error</b> |
| <b>Component (%mol)</b>             |                    | <b>Component (%mol)</b>             |          |               |               |
| Propene                             | 1.0000             | Propylene                           | 1.0000   | 1.0000        | 0.00          |
| <b>Operation Condition</b>          |                    | <b>Operation Condition</b>          |          |               |               |

**Simulation Report – ECC 860 KTA**  
**Working Stage 6**

|                                     |                    |                                     |         |               |               |
|-------------------------------------|--------------------|-------------------------------------|---------|---------------|---------------|
| Temperature (°C)                    | -75.10             | Temperature (°C)                    | -75.10  | -75.1         | 0.01          |
| Pressure (Kg/cm <sup>2</sup> gauge) | 3.26               | Pressure (Kg/cm <sup>2</sup> gauge) | 3.26    | 3.26          | 0.00          |
| Molar Flow (kgmole/h)               | 99.70              | Molar Flow (kgmole/h)               | 99.70   | 99.7          | 0.00          |
| Mass Flow (kg/h)                    | 2797.00            | Mass Flow (kg/h)                    | 2797.00 | 2,797         | 0.00          |
| Molecular Weight                    | 28.0538            | Molecular Weight                    | 28.0538 | 28.05         | -0.01         |
| Total                               | 1.0000             | Total                               | 1.0000  | 1.0000        |               |
| <b>Variable</b>                     | <b>Integration</b> | <b>5133</b>                         |         | <b>Design</b> | <b>%Error</b> |
| <b>Component (%mol)</b>             |                    | <b>Component (%mol)</b>             |         |               |               |
| Propene                             | 1.0000             | Propylene                           | 1.0000  | 1.0000        | 0.00          |
| <b>Operation Condition</b>          |                    | <b>Operation Condition</b>          |         |               |               |
| Temperature (°C)                    | -75.10             | Temperature (°C)                    | -75.10  | -75.1         | 0.01          |
| Pressure (Kg/cm <sup>2</sup> gauge) | 3.26               | Pressure (Kg/cm <sup>2</sup> gauge) | 3.26    | 3.26          | 0.00          |
| Molar Flow (kgmole/h)               | 277.89             | Molar Flow (kgmole/h)               | 277.89  | 277.9         | 0.00          |
| Mass Flow (kg/h)                    | 7796.00            | Mass Flow (kg/h)                    | 7796.00 | 7,796         | 0.00          |
| Molecular Weight                    | 28.0538            | Molecular Weight                    | 28.0538 | 28.05         | -0.01         |
| Total                               | 1.0000             | Total                               | 1.0000  | 1.0000        |               |
| <b>Variable</b>                     | <b>Integration</b> | <b>5122</b>                         |         | <b>Design</b> | <b>%Error</b> |
| <b>Component (%mol)</b>             |                    | <b>Component (%mol)</b>             |         |               |               |
| Propene                             | 1.0000             | Propylene                           | 1.0000  | 1.0000        | 0.00          |
| <b>Operation Condition</b>          |                    | <b>Operation Condition</b>          |         |               |               |
| Temperature (°C)                    | -101.28            | Temperature (°C)                    | -101.28 | -101.1        | -0.17         |
| Pressure (Kg/cm <sup>2</sup> gauge) | 0.18               | Pressure (Kg/cm <sup>2</sup> gauge) | 0.18    | 0.18          | 0.00          |
| Molar Flow (kgmole/h)               | 340.34             | Molar Flow (kgmole/h)               | 340.34  | 340.6         | 0.08          |
| Mass Flow (kg/h)                    | 9547.95            | Mass Flow (kg/h)                    | 9547.95 | 9,556         | 0.08          |
| Molecular Weight                    | 28.0538            | Molecular Weight                    | 28.0538 | 28.05         | -0.01         |
| Total                               | 1.0000             | Total                               | 1.0000  | 1.0000        |               |
| <b>Variable</b>                     | <b>Integration</b> | <b>5125</b>                         |         | <b>Design</b> | <b>%Error</b> |
| <b>Component (%mol)</b>             |                    | <b>Component (%mol)</b>             |         |               |               |
| Propene                             | 1.0000             | Propylene                           | 1.0000  | 1.0000        | 0.00          |
| <b>Operation Condition</b>          |                    | <b>Operation Condition</b>          |         |               |               |
| Temperature (°C)                    | -101.10            | Temperature (°C)                    | -101.10 | -101.1        | 0.00          |
| Pressure (Kg/cm <sup>2</sup> gauge) | 0.18               | Pressure (Kg/cm <sup>2</sup> gauge) | 0.18    | 0.18          | 0.00          |
| Molar Flow (kgmole/h)               | 292.62             | Molar Flow (kgmole/h)               | 292.62  | 292.6         | -0.01         |
| Mass Flow (kg/h)                    | 8209.00            | Mass Flow (kg/h)                    | 8209.00 | 8,209         | 0.00          |
| Molecular Weight                    | 28.0538            | Molecular Weight                    | 28.0538 | 28.05         | -0.01         |
| Total                               | 1.0000             | Total                               | 1.0000  | 1.0000        |               |
| <b>Variable</b>                     | <b>Integration</b> | <b>5136</b>                         |         | <b>Design</b> | <b>%Error</b> |
| <b>Component (%mol)</b>             |                    | <b>Component (%mol)</b>             |         |               |               |
| Propene                             | 1.0000             | Propylene                           | 1.0000  | 1.0000        | 0.00          |



**Simulation Report – ECC 860 KTA**  
**Working Stage 6**

| Operation Condition                 |                    | Operation Condition                 |          |               |               |
|-------------------------------------|--------------------|-------------------------------------|----------|---------------|---------------|
| Temperature (°C)                    | -101.42            | Temperature (°C)                    | -101.42  | -101.3        | -0.12         |
| Pressure (Kg/cm <sup>2</sup> gauge) | 0.17               | Pressure (Kg/cm <sup>2</sup> gauge) | 0.17     | 0.17          | 0.00          |
| Molar Flow (kgmole/h)               | 240.11             | Molar Flow (kgmole/h)               | 240.11   | 240.1         | 0.00          |
| Mass Flow (kg/h)                    | 6736.00            | Mass Flow (kg/h)                    | 6736.00  | 6,736         | 0.00          |
| Molecular Weight                    | 28.0538            | Molecular Weight                    | 28.05    | 28.05         | -0.01         |
| Total                               | 1.0000             | Total                               | 1.0000   | 1.0000        |               |
| <b>Variable</b>                     | <b>Integration</b> | <b>5116</b>                         |          | <b>Design</b> | <b>%Error</b> |
| <b>Component (%mol)</b>             |                    | <b>Component (%mol)</b>             |          |               |               |
| Propene                             | 1.0000             | Propylene                           | 1.0000   | 1.0000        | 0.00          |
| <b>Operation Condition</b>          |                    | <b>Operation Condition</b>          |          |               |               |
| Temperature (°C)                    | -75.10             | Temperature (°C)                    | -75.10   | -75.1         | 0.01          |
| Pressure (Kg/cm <sup>2</sup> gauge) | 3.26               | Pressure (Kg/cm <sup>2</sup> gauge) | 3.26     | 3.26          | 0.00          |
| Molar Flow (kgmole/h)               | 457.81             | Molar Flow (kgmole/h)               | 457.81   | 458.1         | 0.06          |
| Mass Flow (kg/h)                    | 12843.38           | Mass Flow (kg/h)                    | 12843.38 | 12,850        | 0.05          |
| Molecular Weight                    | 28.0538            | Molecular Weight                    | 28.05    | 28.05         | -0.01         |
| Total                               | 1.0000             | Total                               | 1.0000   | 1.0000        |               |
| <b>Variable</b>                     | <b>Integration</b> | <b>5103</b>                         |          | <b>Design</b> | <b>%Error</b> |
| <b>Component (%mol)</b>             |                    | <b>Component (%mol)</b>             |          |               |               |
| Propene                             | 1.0000             | Propylene                           | 1.0000   | 1.0000        | 0.00          |
| <b>Operation Condition</b>          |                    | <b>Operation Condition</b>          |          |               |               |
| Temperature (°C)                    | -62.80             | Temperature (°C)                    | -62.80   | -62.8         | 0.00          |
| Pressure (Kg/cm <sup>2</sup> gauge) | 5.91               | Pressure (Kg/cm <sup>2</sup> gauge) | 5.91     | 5.91          | 0.00          |
| Molar Flow (kgmole/h)               | 1265.07            | Molar Flow (kgmole/h)               | 1265.07  | 1,265.10      | 0.00          |
| Mass Flow (kg/h)                    | 35490.00           | Mass Flow (kg/h)                    | 35490.00 | 35,490        | 0.00          |
| Molecular Weight                    | 28.0538            | Molecular Weight                    | 28.05    | 28.05         | -0.01         |
| Total                               | 1.0000             | Total                               | 1.0000   | 1.0000        |               |
| <b>Variable</b>                     | <b>Integration</b> | <b>5106</b>                         |          | <b>Design</b> | <b>%Error</b> |
| <b>Component (%mol)</b>             |                    | <b>Component (%mol)</b>             |          |               |               |
| Propene                             | 1.0000             | Propylene                           | 1.0000   | 1.0000        | 0.00          |
| <b>Operation Condition</b>          |                    | <b>Operation Condition</b>          |          |               |               |
| Temperature (°C)                    | 41.00              | Temperature (°C)                    | 41.00    | 41            | 0.00          |
| Pressure (Kg/cm <sup>2</sup> gauge) | 25.73              | Pressure (Kg/cm <sup>2</sup> gauge) | 25.73    | 25.73         | 0.00          |
| Molar Flow (kgmole/h)               | 2701.72            | Molar Flow (kgmole/h)               | 2701.72  | 2,702.00      | 0.01          |
| Mass Flow (kg/h)                    | 75793.38           | Mass Flow (kg/h)                    | 75793.38 | 75,801        | 0.01          |
| Molecular Weight                    | 28.0538            | Molecular Weight                    | 28.0538  | 28.05         | -0.01         |
| Total                               | 1.0000             | Total                               | 1.0000   | 1.0000        |               |
| <b>Variable</b>                     | <b>Integration</b> | <b>5109</b>                         |          | <b>Design</b> | <b>%Error</b> |
| <b>Component (%mol)</b>             |                    | <b>Component (%mol)</b>             |          |               |               |

**Simulation Report – ECC 860 KTA**  
**Working Stage 6**

|                                     |                    |                                     |          |               |               |
|-------------------------------------|--------------------|-------------------------------------|----------|---------------|---------------|
| Propene                             | 1.0000             | Propylene                           | 1.0000   | 1.0000        | 0.00          |
| <b>Operation Condition</b>          |                    | <b>Operation Condition</b>          |          |               |               |
| Temperature (°C)                    | -55.00             | Temperature (°C)                    | -55.00   | -55           | 0.00          |
| Pressure (Kg/cm <sup>2</sup> gauge) | 25.18              | Pressure (Kg/cm <sup>2</sup> gauge) | 25.18    | 25.18         | 0.00          |
| Molar Flow (kgmole/h)               | 1275.69            | Molar Flow (kgmole/h)               | 1275.69  | 1,275.70      | 0.00          |
| Mass Flow (kg/h)                    | 35788.00           | Mass Flow (kg/h)                    | 35788.00 | 35,788        | 0.00          |
| Molecular Weight                    | 28.0538            | Molecular Weight                    | 28.05    | 28.05         | -0.01         |
| Total                               | 1.0000             | Total                               | 1.0000   | 1.0000        |               |
| <b>Variable</b>                     | <b>Integration</b> | <b>5139</b>                         |          | <b>Design</b> | <b>%Error</b> |
| <b>Component (%mol)</b>             |                    | <b>Component (%mol)</b>             |          |               |               |
| Propene                             | 1.0000             | Propylene                           | 1.0000   | 1.0000        | 0.00          |
| <b>Operation Condition</b>          |                    | <b>Operation Condition</b>          |          |               |               |
| Temperature (°C)                    | -55.00             | Temperature (°C)                    | -55.00   | -55           | 0.00          |
| Pressure (Kg/cm <sup>2</sup> gauge) | 25.18              | Pressure (Kg/cm <sup>2</sup> gauge) | 25.18    | 25.18         | 0.00          |
| Molar Flow (kgmole/h)               | 136.31             | Molar Flow (kgmole/h)               | 136.31   | 136.3         | -0.01         |
| Mass Flow (kg/h)                    | 3824.00            | Mass Flow (kg/h)                    | 3824.00  | 3824          | 0.00          |
| Molecular Weight                    | 28.0538            | Molecular Weight                    | 28.0538  | 28.05         | -0.01         |
| Total                               | 1.0000             | Total                               | 1.0000   | 1.0000        |               |
| <b>Variable</b>                     | <b>Integration</b> | <b>5110</b>                         |          | <b>Design</b> | <b>%Error</b> |
| <b>Component (%mol)</b>             |                    | <b>Component (%mol)</b>             |          |               |               |
| Propene                             | 1.0000             | Propylene                           | 1.0000   | 1.0000        | 0.00          |
| <b>Operation Condition</b>          |                    | <b>Operation Condition</b>          |          |               |               |
| Temperature (°C)                    | -55.00             | Temperature (°C)                    | -55.00   | -55           | 0.00          |
| Pressure (Kg/cm <sup>2</sup> gauge) | 25.18              | Pressure (Kg/cm <sup>2</sup> gauge) | 25.18    | 25.18         | 0.00          |
| Molar Flow (kgmole/h)               | 1078.11            | Molar Flow (kgmole/h)               | 1078.11  | 1,078.10      | 0.00          |
| Mass Flow (kg/h)                    | 30245.00           | Mass Flow (kg/h)                    | 30245.00 | 30,246        | 0.00          |
| Molecular Weight                    | 28.0538            | Molecular Weight                    | 28.05    | 28.05         | -0.01         |
| Total                               | 1.0000             | Total                               | 1.0000   | 1.0000        |               |
| <b>Variable</b>                     | <b>Integration</b> | <b>5131</b>                         |          | <b>Design</b> | <b>%Error</b> |
| <b>Component (%mol)</b>             |                    | <b>Component (%mol)</b>             |          |               |               |
| Propene                             | 1.0000             | Propylene                           | 1.0000   | 1.0000        | 0.00          |
| <b>Operation Condition</b>          |                    | <b>Operation Condition</b>          |          |               |               |
| Temperature (°C)                    | -62.80             | Temperature (°C)                    | -62.80   | -62.8         | 0.00          |
| Pressure (Kg/cm <sup>2</sup> gauge) | 5.91               | Pressure (Kg/cm <sup>2</sup> gauge) | 5.91     | 5.91          | 0.00          |
| Molar Flow (kgmole/h)               | 1078.11            | Molar Flow (kgmole/h)               | 1078.11  | 1,078.10      | 0.00          |
| Mass Flow (kg/h)                    | 30245.00           | Mass Flow (kg/h)                    | 30245.00 | 30,246        | 0.00          |
| Molecular Weight                    | 28.0538            | Molecular Weight                    | 28.05    | 28.05         | -0.01         |
| Total                               | 1.0000             | Total                               | 1.0000   | 1.0000        |               |
| <b>Variable</b>                     | <b>Integration</b> | <b>5142</b>                         |          | <b>Design</b> | <b>%Error</b> |

**Simulation Report – ECC 860 KTA**  
**Working Stage 6**

|                                     |                    |                                     |          |               |               |
|-------------------------------------|--------------------|-------------------------------------|----------|---------------|---------------|
| <b>Component (%mol)</b>             |                    | <b>Component (%mol)</b>             |          |               |               |
| Propene                             | 1.0000             | Propylene                           | 1.0000   | 1.0000        | 0.00          |
| <b>Operation Condition</b>          |                    | <b>Operation Condition</b>          |          |               |               |
| Temperature (°C)                    | -62.80             | Temperature (°C)                    | -62.80   | -62.8         | 0.00          |
| Pressure (Kg/cm <sup>2</sup> gauge) | 5.91               | Pressure (Kg/cm <sup>2</sup> gauge) | 5.91     | 5.91          | 0.00          |
| Molar Flow (kgmole/h)               | 237.65             | Molar Flow (kgmole/h)               | 237.65   | 237.6         | -0.02         |
| Mass Flow (kg/h)                    | 6667.00            | Mass Flow (kg/h)                    | 6667.00  | 6667          | 0.00          |
| Molecular Weight                    | 28.0538            | Molecular Weight                    | 28.05    | 28.05         | -0.01         |
| Total                               | 1.0000             | Total                               | 1.0000   | 1.0000        |               |
| <b>Variable</b>                     | <b>Integration</b> | <b>5114</b>                         |          | <b>Design</b> | <b>%Error</b> |
| <b>Component (%mol)</b>             |                    | <b>Component (%mol)</b>             |          |               |               |
| Propene                             | 1.0000             | Propylene                           | 1.0000   | 1.0000        | 0.00          |
| <b>Operation Condition</b>          |                    | <b>Operation Condition</b>          |          |               |               |
| Temperature (°C)                    | -71.64             | Temperature (°C)                    | -71.64   | -72           | 0.49          |
| Pressure (Kg/cm <sup>2</sup> gauge) | 5.91               | Pressure (Kg/cm <sup>2</sup> gauge) | 5.91     | 5.91          | 0.00          |
| Molar Flow (kgmole/h)               | 1426.02            | Molar Flow (kgmole/h)               | 1426.02  | 1,426.30      | 0.02          |
| Mass Flow (kg/h)                    | 40005.38           | Mass Flow (kg/h)                    | 40005.38 | 40,012        | 0.02          |
| Molecular Weight                    | 28.0538            | Molecular Weight                    | 28.0538  | 28.05         | -0.01         |
| Total                               | 1.0000             | Total                               | 1.0000   | 1.0000        |               |
| <b>Variable</b>                     | <b>Integration</b> | <b>5138</b>                         |          | <b>Design</b> | <b>%Error</b> |
| <b>Component (%mol)</b>             |                    | <b>Component (%mol)</b>             |          |               |               |
| Propene                             | 1.0000             | Propylene                           | 1.0000   | 1.0000        | 0.00          |
| <b>Operation Condition</b>          |                    | <b>Operation Condition</b>          |          |               |               |
| Temperature (°C)                    | -75.10             | Temperature (°C)                    | -75.10   | -75.1         | 0.00          |
| Pressure (Kg/cm <sup>2</sup> gauge) | 3.26               | Pressure (Kg/cm <sup>2</sup> gauge) | 3.26     | 3.26          | 0.00          |
| Molar Flow (kgmole/h)               | 99.70              | Molar Flow (kgmole/h)               | 99.70    | 99.7          | 0.00          |
| Mass Flow (kg/h)                    | 2797.00            | Mass Flow (kg/h)                    | 2797.00  | 2,797         | 0.00          |
| Molecular Weight                    | 28.0538            | Molecular Weight                    | 28.0538  | 28.05         | -0.01         |
| Total                               | 1.0000             | Total                               | 1.0000   | 1.0000        |               |
| <b>Variable</b>                     | <b>Integration</b> | <b>5115</b>                         |          | <b>Design</b> | <b>%Error</b> |
| <b>Component (%mol)</b>             |                    | <b>Component (%mol)</b>             |          |               |               |
| Propene                             | 1.0000             | Propylene                           | 1.0000   | 1.0000        | 0.00          |
| <b>Operation Condition</b>          |                    | <b>Operation Condition</b>          |          |               |               |
| Temperature (°C)                    | -71.58             | Temperature (°C)                    | -71.58   | -71.9         | 0.45          |
| Pressure (Kg/cm <sup>2</sup> gauge) | 5.91               | Pressure (Kg/cm <sup>2</sup> gauge) | 5.91     | 5.91          | 0.00          |
| Molar Flow (kgmole/h)               | 457.81             | Molar Flow (kgmole/h)               | 457.81   | 458.1         | 0.06          |
| Mass Flow (kg/h)                    | 12843.38           | Mass Flow (kg/h)                    | 12843.38 | 12,850        | 0.05          |
| Molecular Weight                    | 28.0538            | Molecular Weight                    | 28.0538  | 28.05         | -0.01         |
| Total                               | 1.0000             | Total                               | 1.0000   | 1.0000        |               |

**Simulation Report – ECC 860 KTA**  
**Working Stage 6**

| Variable                            | Integration | 5121                                |         | Design | %Error |
|-------------------------------------|-------------|-------------------------------------|---------|--------|--------|
| Component (%mol)                    |             | Component (%mol)                    |         |        |        |
| Propene                             | 1.0000      | Propylene                           | 1.0000  | 1.0000 | 0.00   |
| Operation Condition                 |             | Operation Condition                 |         |        |        |
| Temperature (°C)                    | -75.10      | Temperature (°C)                    | -75.10  | -75.1  | 0.00   |
| Pressure (Kg/cm <sup>2</sup> gauge) | 3.26        | Pressure (Kg/cm <sup>2</sup> gauge) | 3.26    | 3.26   | 0.00   |
| Molar Flow (kgmole/h)               | 292.62      | Molar Flow (kgmole/h)               | 292.62  | 292.6  | -0.01  |
| Mass Flow (kg/h)                    | 8209.00     | Mass Flow (kg/h)                    | 8209.00 | 8,209  | 0.00   |
| Molecular Weight                    | 28.0538     | Molecular Weight                    | 28.0538 | 28.05  | -0.01  |
| Total                               | 1.0000      | Total                               | 1.0000  | 1.0000 |        |
| Variable                            | Integration | 5124                                |         | Design | %Error |
| Component (%mol)                    |             | Component (%mol)                    |         |        |        |
| Propene                             | 1.0000      | Propylene                           | 1.0000  | 1.0000 | 0.00   |
| Operation Condition                 |             | Operation Condition                 |         |        |        |
| Temperature (°C)                    | -101.28     | Temperature (°C)                    | -101.28 | -101.1 | -0.17  |
| Pressure (Kg/cm <sup>2</sup> gauge) | 0.18        | Pressure (Kg/cm <sup>2</sup> gauge) | 0.18    | 0.18   | 0.00   |
| Molar Flow (kgmole/h)               | 292.62      | Molar Flow (kgmole/h)               | 292.62  | 292.6  | -0.01  |
| Mass Flow (kg/h)                    | 8209.00     | Mass Flow (kg/h)                    | 8209.00 | 8,209  | 0.00   |
| Molecular Weight                    | 28.0538     | Molecular Weight                    | 28.0538 | 28.05  | -0.01  |
| Total                               | 1.0000      | Total                               | 1.0000  | 1.0000 |        |
| Variable                            | Integration | 5112                                |         | Design | %Error |
| Component (%mol)                    |             | Component (%mol)                    |         |        |        |
| Propene                             | 1.0000      | Propylene                           | 1.0000  | 1.0000 | 0.00   |
| Operation Condition                 |             | Operation Condition                 |         |        |        |
| Temperature (°C)                    | -62.80      | Temperature (°C)                    | -62.80  | -62.8  | -0.01  |
| Pressure (Kg/cm <sup>2</sup> gauge) | 5.91        | Pressure (Kg/cm <sup>2</sup> gauge) | 5.91    | 5.91   | 0.00   |
| Molar Flow (kgmole/h)               | 10.62       | Molar Flow (kgmole/h)               | 10.62   | 10.6   | -0.21  |
| Mass Flow (kg/h)                    | 298.00      | Mass Flow (kg/h)                    | 298.00  | 298    | 0.00   |
| Molecular Weight                    | 28.0538     | Molecular Weight                    | 28.0538 | 28.05  | -0.01  |
| Total                               | 1.0000      | Total                               | 1.0000  | 1.0000 |        |

**Table A.5.2. C4C5 Hydrogenation Stream Compositions**

| Variable         | Integration | 1241                       |        | Design | %Error |
|------------------|-------------|----------------------------|--------|--------|--------|
| Component (%mol) |             | Component (%mol)           |        |        |        |
| Hydrogen         | 0.0008      | Hydrogen                   | 0.0008 | 0.0008 | 0.00   |
| Methane          | 0.0044      | Methane                    | 0.0044 | 0.0044 | 0.00   |
| Propadiene       | 0.0000      | Propadiene/Methylacetylene | 0.0000 | 0.0000 |        |
| Propene          | 0.0000      | Propylene                  | 0.0000 | 0.0000 |        |
| Propane          | 0.0000      | Propane                    | 0.0000 | 0.0000 |        |
| 13-Butadiene     | 0.0036      | Butadiene/C4 Acetylene     | 0.0036 | 0.0036 | 0.00   |

**Simulation Report – ECC 860 KTA**  
**Working Stage 6**

|                                     |                    |                                     |          |               |               |
|-------------------------------------|--------------------|-------------------------------------|----------|---------------|---------------|
| 1-Butene                            | 0.0557             | Butylenes                           | 0.0557   | 0.0557        | 0.00          |
| n-Butane                            | 0.0067             | Butanes                             | 0.0067   | 0.0067        | 0.00          |
| 1-Pentene                           | 0.8997             | C5-Hydrocarbons                     | 0.8997   | 0.8997        | 0.00          |
| Cyclohexane                         | 0.0259             | C6 Non-Aromatics                    | 0.0259   | 0.0259        | 0.00          |
| n-Heptane                           | 0.0000             | C7 Non-Aromatics                    | 0.0000   | 0.0000        |               |
| n-Octane                            | 0.0000             | C8 Non-Aromatics                    | 0.0000   | 0.0000        |               |
| Benzene                             | 0.0027             | Benzene                             | 0.0027   | 0.0027        | 0.00          |
| Water                               | 0.0005             | Steam/Water                         | 0.0005   | 0.0005        | 0.00          |
| Nitrogen                            | 0.0000             | Nitrogen                            | 0.0000   | 0.0000        |               |
| <b>Operation Condition</b>          |                    | <b>Operation Condition</b>          |          |               |               |
| Temperature (°C)                    | 43.00              | Temperature (°C)                    | 43.00    | 43.0000       | 0.00          |
| Pressure (Kg/cm <sup>2</sup> gauge) | 5.50               | Pressure (Kg/cm <sup>2</sup> gauge) | 5.50     | 5.5000        | 0.00          |
| Molar Flow (kgmole/h)               | 215.87             | Molar Flow (kgmole/h)               | 215.87   | 216.6000      | 0.34          |
| Mass Flow (kg/h)                    | 14956.00           | Mass Flow (kg/h)                    | 14956.00 | 14956.0000    | 0.00          |
| Molecular Weight                    | 69.2817            | Molecular Weight                    | 69.28    | 69.0400       | -0.35         |
| Total                               | 1.0000             | Total                               | 1.0000   | 1.0000        |               |
| <b>Variable</b>                     | <b>Integration</b> | <b>1121</b>                         |          | <b>Design</b> | <b>%Error</b> |
| <b>Component (%mol)</b>             |                    | <b>Component (%mol)</b>             |          |               |               |
| Hydrogen                            | 0.0002             | Hydrogen                            | 0.0002   | 0.0002        | -20.51        |
| Methane                             | 0.0013             | Methane                             | 0.0013   | 0.0013        | -1.97         |
| Propadiene                          | 0.0029             | Propadiene/Methylacetylene          | 0.0029   | 0.0029        | -0.09         |
| Propene                             | 0.0001             | Propylene                           | 0.0001   | 0.0001        | -17.64        |
| Propane                             | 0.0008             | Propane                             | 0.0008   | 0.0008        | 1.77          |
| 13-Butadiene                        | 0.0779             | Butadiene/C4 Acetylene              | 0.0779   | 0.0771        | -1.06         |
| 1-Butene                            | 0.4741             | Butylenes                           | 0.4741   | 0.4735        | -0.13         |
| n-Butane                            | 0.1600             | Butanes                             | 0.1600   | 0.1598        | -0.15         |
| 1-Pentene                           | 0.2729             | C5-Hydrocarbons                     | 0.2729   | 0.2741        | 0.44          |
| Cyclohexane                         | 0.0078             | C6 Non-Aromatics                    | 0.0078   | 0.0078        | -0.04         |
| n-Heptane                           | 0.0000             | C7 Non-Aromatics                    | 0.0000   | 0.0000        |               |
| n-Octane                            | 0.0000             | C8 Non-Aromatics                    | 0.0000   | 0.0000        |               |
| Benzene                             | 0.0008             | Benzene                             | 0.0008   | 0.0008        | -1.68         |
| Water                               | 0.0011             | Steam/Water                         | 0.0011   | 0.0015        | 29.68         |
| Nitrogen                            | 0.0000             | Nitrogen                            | 0.0000   | 0.0000        |               |
| <b>Operation Condition</b>          |                    | <b>Operation Condition</b>          |          |               |               |
| Temperature (°C)                    | 41.89              | Temperature (°C)                    | 41.89    | 42.1000       | 0.49          |
| Pressure (Kg/cm <sup>2</sup> gauge) | 5.49               | Pressure (Kg/cm <sup>2</sup> gauge) | 5.49     | 5.4900        | 0.00          |
| Molar Flow (kgmole/h)               | 716.53             | Molar Flow (kgmole/h)               | 716.53   | 717.7000      | 0.16          |
| Mass Flow (kg/h)                    | 43116.42           | Mass Flow (kg/h)                    | 43116.42 | 43122.0000    | 0.01          |
| Molecular Weight                    | 60.1740            | Molecular Weight                    | 60.17    | 60.0800       | -0.16         |
| Total                               | 1.0000             | Total                               | 1.0000   | 0.9999        |               |

**Simulation Report – ECC 860 KTA**  
**Working Stage 6**

| Variable                            | Integration | 1125                                |          | Design     | %Error |
|-------------------------------------|-------------|-------------------------------------|----------|------------|--------|
| Component (%mol)                    |             | Component (%mol)                    |          |            |        |
| Hydrogen                            | 0.0069      | Hydrogen                            | 0.0069   | 0.0071     | 2.53   |
| Methane                             | 0.0084      | Methane                             | 0.0084   | 0.0085     | 1.61   |
| Propadiene                          | 0.0000      | Propadiene/Methylacetylene          | 0.0000   | 0.0000     |        |
| Propene                             | 0.0001      | Propylene                           | 0.0001   | 0.0007     | 85.00  |
| Propane                             | 0.0034      | Propane                             | 0.0034   | 0.0027     | -24.94 |
| 13-Butadiene                        | 0.0000      | Butadiene/C4 Acetylene              | 0.0000   | 0.0000     |        |
| 1-Butene                            | 0.0197      | Butylenes                           | 0.0197   | 0.0201     | 2.08   |
| n-Butane                            | 0.6801      | Butanes                             | 0.6801   | 0.6786     | -0.21  |
| 1-Pentene                           | 0.2719      | C5-Hydrocarbons                     | 0.2719   | 0.2723     | 0.14   |
| Cyclohexane                         | 0.0078      | C6 Non-Aromatics                    | 0.0078   | 0.0078     | 0.08   |
| n-Heptane                           | 0.0000      | C7 Non-Aromatics                    | 0.0000   | 0.0000     |        |
| n-Octane                            | 0.0000      | C8 Non-Aromatics                    | 0.0000   | 0.0000     |        |
| Benzene                             | 0.0008      | Benzene                             | 0.0008   | 0.0008     | -1.56  |
| Water                               | 0.0009      | Steam/Water                         | 0.0009   | 0.0014     | 35.00  |
| Nitrogen                            | 0.0001      | Nitrogen                            | 0.0001   | 0.0001     | 23.18  |
| Operation Condition                 |             | Operation Condition                 |          |            |        |
| Temperature (°C)                    | 123.61      | Temperature (°C)                    | 123.61   | 123.7000   | 0.07   |
| Pressure (Kg/cm <sup>2</sup> gauge) | 28.00       | Pressure (Kg/cm <sup>2</sup> gauge) | 28.00    | 28.0000    | 0.00   |
| Molar Flow (kgmole/h)               | 661.91      | Molar Flow (kgmole/h)               | 661.91   | 658.8000   | -0.47  |
| Mass Flow (kg/h)                    | 40205.00    | Mass Flow (kg/h)                    | 40205.00 | 40205.0000 | 0.00   |
| Molecular Weight                    | 60.7413     | Molecular Weight                    | 60.74    | 61.0300    | 0.47   |
| Total                               | 1.0000      | Total                               | 1.0000   | 1.0001     |        |
| Variable                            | Integration | 1103                                |          | Design     | %Error |
| Component (%mol)                    |             | Component (%mol)                    |          |            |        |
| Hydrogen                            | 0.9650      | Hydrogen                            | 0.9650   | 0.9650     | 0.00   |
| Methane                             | 0.0341      | Methane                             | 0.0341   | 0.0341     | 0.00   |
| Propadiene                          | 0.0000      | Propadiene/Methylacetylene          | 0.0000   | 0.0000     |        |
| Propene                             | 0.0000      | Propylene                           | 0.0000   | 0.0000     |        |
| Propane                             | 0.0000      | Propane                             | 0.0000   | 0.0000     |        |
| 13-Butadiene                        | 0.0000      | Butadiene/C4 Acetylene              | 0.0000   | 0.0000     |        |
| 1-Butene                            | 0.0000      | Butylenes                           | 0.0000   | 0.0000     |        |
| n-Butane                            | 0.0000      | Butanes                             | 0.0000   | 0.0000     |        |
| 1-Pentene                           | 0.0000      | C5-Hydrocarbons                     | 0.0000   | 0.0000     |        |
| Cyclohexane                         | 0.0000      | C6 Non-Aromatics                    | 0.0000   | 0.0000     |        |
| n-Heptane                           | 0.0000      | C7 Non-Aromatics                    | 0.0000   | 0.0000     |        |
| n-Octane                            | 0.0000      | C8 Non-Aromatics                    | 0.0000   | 0.0000     |        |
| Benzene                             | 0.0000      | Benzene                             | 0.0000   | 0.0000     |        |
| Water                               | 0.0000      | Steam/Water                         | 0.0000   | 0.0000     |        |
| Nitrogen                            | 0.0009      | Nitrogen                            | 0.0009   | 0.0009     | 0.00   |
| Operation Condition                 |             | Operation Condition                 |          |            |        |

**Simulation Report – ECC 860 KTA**  
**Working Stage 6**

|                                     |                    |                                     |         |               |               |
|-------------------------------------|--------------------|-------------------------------------|---------|---------------|---------------|
| Temperature (°C)                    | 15.99              | Temperature (°C)                    | 15.99   | 16.0000       | 0.04          |
| Pressure (Kg/cm <sup>2</sup> gauge) | 30.28              | Pressure (Kg/cm <sup>2</sup> gauge) | 30.28   | 30.2800       | 0.00          |
| Molar Flow (kgmole/h)               | 666.08             | Molar Flow (kgmole/h)               | 666.08  | 666.1000      | 0.00          |
| Mass Flow (kg/h)                    | 1677.00            | Mass Flow (kg/h)                    | 1677.00 | 1677.0000     | 0.00          |
| Molecular Weight                    | 2.5177             | Molecular Weight                    | 2.52    | 2.5200        | 0.09          |
| Total                               | 1.0000             | Total                               | 1.0000  | 1.0000        |               |
| <b>Variable</b>                     | <b>Integration</b> | <b>4606</b>                         |         | <b>Design</b> | <b>%Error</b> |
| <b>Component (%mol)</b>             |                    | <b>Component (%mol)</b>             |         |               |               |
| Hydrogen                            | 0.0000             | Hydrogen                            | 0.0000  | 0.0000        |               |
| Methane                             | 0.0000             | Methane                             | 0.0000  | 0.0000        |               |
| Propadiene                          | 0.0062             | Propadiene/Methylacetylene          | 0.0062  | 0.0062        | 0.01          |
| Propene                             | 0.0001             | Propylene                           | 0.0001  | 0.0001        | 0.01          |
| Propane                             | 0.0001             | Propane                             | 0.0001  | 0.0001        | 0.01          |
| 13-Butadiene                        | 0.3442             | Butadiene/C4 Acetylene              | 0.3442  | 0.3442        | 0.01          |
| 1-Butene                            | 0.4767             | Butylenes                           | 0.4767  | 0.4767        | 0.01          |
| n-Butane                            | 0.1708             | Butanes                             | 0.1708  | 0.1708        | 0.01          |
| 1-Pentene                           | 0.0020             | C5-Hydrocarbons                     | 0.0020  | 0.0020        | 0.01          |
| Cyclohexane                         | 0.0000             | C6 Non-Aromatics                    | 0.0000  | 0.0000        |               |
| n-Heptane                           | 0.0000             | C7 Non-Aromatics                    | 0.0000  | 0.0000        |               |
| n-Octane                            | 0.0000             | C8 Non-Aromatics                    | 0.0000  | 0.0000        |               |
| Benzene                             | 0.0000             | Benzene                             | 0.0000  | 0.0000        |               |
| Water                               | 0.0000             | Steam/Water                         | 0.0000  | 0.0000        |               |
| Nitrogen                            | 0.0000             | Nitrogen                            | 0.0000  | 0.0000        |               |
| <b>Operation Condition</b>          |                    | <b>Operation Condition</b>          |         |               |               |
| Temperature (°C)                    | 39.80              | Temperature (°C)                    | 39.80   | 39.8000       | 0.00          |
| Pressure (Kg/cm <sup>2</sup> gauge) | 5.50               | Pressure (Kg/cm <sup>2</sup> gauge) | 5.50    | 5.5000        | 0.00          |
| Molar Flow (kgmole/h)               | 158.97             | Molar Flow (kgmole/h)               | 158.97  | 159.0000      | 0.02          |
| Mass Flow (kg/h)                    | 8852.00            | Mass Flow (kg/h)                    | 8852.00 | 8852.0000     | 0.00          |
| Molecular Weight                    | 55.6842            | Molecular Weight                    | 55.68   | 55.6600       | -0.04         |
| Total                               | 1.0000             | Total                               | 1.0000  | 1.0001        |               |
| <b>Variable</b>                     | <b>Integration</b> | <b>1105</b>                         |         | <b>Design</b> | <b>%Error</b> |
| <b>Component (%mol)</b>             |                    | <b>Component (%mol)</b>             |         |               |               |
| Hydrogen                            | 0.0163             | Hydrogen                            | 0.0163  | 0.0160        | -2.06         |
| Methane                             | 0.0201             | Methane                             | 0.0201  | 0.0185        | -8.79         |
| Propadiene                          | 0.0000             | Propadiene/Methylacetylene          | 0.0000  | 0.0000        |               |
| Propene                             | 0.0001             | Propylene                           | 0.0001  | 0.0009        | 84.87         |
| Propane                             | 0.0042             | Propane                             | 0.0042  | 0.0033        | -27.75        |
| 13-Butadiene                        | 0.0000             | Butadiene/C4 Acetylene              | 0.0000  | 0.0000        |               |
| 1-Butene                            | 0.0205             | Butylenes                           | 0.0205  | 0.0205        | 0.15          |
| n-Butane                            | 0.6867             | Butanes                             | 0.6867  | 0.6932        | 0.93          |
| 1-Pentene                           | 0.2431             | C5-Hydrocarbons                     | 0.2431  | 0.2373        | -2.43         |

**Simulation Report – ECC 860 KTA**  
**Working Stage 6**

|                                     |                    |                                     |           |               |               |
|-------------------------------------|--------------------|-------------------------------------|-----------|---------------|---------------|
| Cyclohexane                         | 0.0061             | C6 Non-Aromatics                    | 0.0061    | 0.0062        | 1.44          |
| n-Heptane                           | 0.0000             | C7 Non-Aromatics                    | 0.0000    | 0.0000        |               |
| n-Octane                            | 0.0000             | C8 Non-Aromatics                    | 0.0000    | 0.0000        |               |
| Benzene                             | 0.0006             | Benzene                             | 0.0006    | 0.0007        | 7.65          |
| Water                               | 0.0019             | Steam/Water                         | 0.0019    | 0.0031        | 37.17         |
| Nitrogen                            | 0.0002             | Nitrogen                            | 0.0002    | 0.0002        | -9.22         |
| <b>Operation Condition</b>          |                    | <b>Operation Condition</b>          |           |               |               |
| Temperature (°C)                    | 43.41              | Temperature (°C)                    | 43.41     | 43.3000       | -0.25         |
| Pressure (Kg/cm <sup>2</sup> gauge) | 29.10              | Pressure (Kg/cm <sup>2</sup> gauge) | 29.10     | 29.1000       | 0.00          |
| Molar Flow (kgmole/h)               | 4388.20            | Molar Flow (kgmole/h)               | 4388.20   | 4372.2000     | -0.37         |
| Mass Flow (kg/h)                    | 260067.38          | Mass Flow (kg/h)                    | 260067.38 | 260236.0000   | 0.06          |
| Molecular Weight                    | 59.2651            | Molecular Weight                    | 59.27     | 59.5200       | 0.43          |
| Total                               | 1.0000             | Total                               | 1.0000    | 0.9999        |               |
| <b>Variable</b>                     | <b>Integration</b> | <b>1102</b>                         |           | <b>Design</b> | <b>%Error</b> |
| <b>Component (%mol)</b>             |                    | <b>Component (%mol)</b>             |           |               |               |
| Hydrogen                            | 0.9650             | Hydrogen                            | 0.9650    | 0.9650        | 0.00          |
| Methane                             | 0.0341             | Methane                             | 0.0341    | 0.0341        | 0.00          |
| Propadiene                          | 0.0000             | Propadiene/Methylacetylene          | 0.0000    | 0.0000        |               |
| Propene                             | 0.0000             | Propylene                           | 0.0000    | 0.0000        |               |
| Propane                             | 0.0000             | Propane                             | 0.0000    | 0.0000        |               |
| n-Heptane                           | 0.0000             | C7 Non-Aromatics                    | 0.0000    | 0.0000        |               |
| n-Octane                            | 0.0000             | C8 Non-Aromatics                    | 0.0000    | 0.0000        |               |
| Benzene                             | 0.0000             | Benzene                             | 0.0000    | 0.0000        |               |
| Water                               | 0.0000             | Steam/Water                         | 0.0000    | 0.0000        |               |
| Nitrogen                            | 0.0009             | Nitrogen                            | 0.0009    | 0.0009        | 0.00          |
| <b>Operation Condition</b>          |                    | <b>Operation Condition</b>          |           |               |               |
| Temperature (°C)                    | 16.00              | Temperature (°C)                    | 16.00     | 16.0000       | 0.00          |
| Pressure (Kg/cm <sup>2</sup> gauge) | 31.07              | Pressure (Kg/cm <sup>2</sup> gauge) | 31.07     | 31.0700       | 0.00          |
| Molar Flow (kgmole/h)               | 693.88             | Molar Flow (kgmole/h)               | 693.88    | 693.9000      | 0.00          |
| Mass Flow (kg/h)                    | 1747.00            | Mass Flow (kg/h)                    | 1747.00   | 1747.0000     | 0.00          |
| Molecular Weight                    | 2.5177             | Molecular Weight                    | 2.52      | 2.5200        | 0.09          |
| Total                               | 1.0000             | Total                               | 1.0000    | 1.0000        |               |
| <b>Variable</b>                     | <b>Integration</b> | <b>1111</b>                         |           | <b>Design</b> | <b>%Error</b> |
| <b>Component (%mol)</b>             |                    | <b>Component (%mol)</b>             |           |               |               |
| Hydrogen                            | 0.0069             | Hydrogen                            | 0.0069    | 0.0071        | 2.53          |
| Methane                             | 0.0084             | Methane                             | 0.0084    | 0.0085        | 1.61          |
| Propadiene                          | 0.0000             | Propadiene/Methylacetylene          | 0.0000    | 0.0000        |               |
| Propene                             | 0.0001             | Propylene                           | 0.0001    | 0.0007        | 85.00         |
| Propane                             | 0.0034             | Propane                             | 0.0034    | 0.0027        | -24.94        |
| 13-Butadiene                        | 0.0000             | Butadiene/C4 Acetylene              | 0.0000    | 0.0000        |               |



**Simulation Report – ECC 860 KTA**  
**Working Stage 6**

|                                     |                    |                                     |           |               |               |
|-------------------------------------|--------------------|-------------------------------------|-----------|---------------|---------------|
| 1-Butene                            | 0.0197             | Butylenes                           | 0.0197    | 0.0201        | 2.08          |
| n-Butane                            | 0.6801             | Butanes                             | 0.6801    | 0.6786        | -0.21         |
| 1-Pentene                           | 0.2719             | C5-Hydrocarbons                     | 0.2719    | 0.2723        | 0.14          |
| Cyclohexane                         | 0.0078             | C6 Non-Aromatics                    | 0.0078    | 0.0078        | 0.08          |
| n-Heptane                           | 0.0000             | C7 Non-Aromatics                    | 0.0000    | 0.0000        |               |
| n-Octane                            | 0.0000             | C8 Non-Aromatics                    | 0.0000    | 0.0000        |               |
| Benzene                             | 0.0008             | Benzene                             | 0.0008    | 0.0008        | -1.56         |
| Water                               | 0.0009             | Steam/Water                         | 0.0009    | 0.0014        | 35.00         |
| Nitrogen                            | 0.0001             | Nitrogen                            | 0.0001    | 0.0001        | 23.18         |
| <b>Operation Condition</b>          |                    | <b>Operation Condition</b>          |           |               |               |
| Temperature (°C)                    | 123.20             | Temperature (°C)                    | 123.20    | 123.2000      | 0.00          |
| Pressure (Kg/cm <sup>2</sup> gauge) | 26.00              | Pressure (Kg/cm <sup>2</sup> gauge) | 26.00     | 26.0000       | 0.00          |
| Molar Flow (kgmole/h)               | 4412.49            | Molar Flow (kgmole/h)               | 4412.49   | 4386.1000     | -0.60         |
| Mass Flow (kg/h)                    | 268020.37          | Mass Flow (kg/h)                    | 268020.37 | 267686.0000   | -0.12         |
| Molecular Weight                    | 60.7413            | Molecular Weight                    | 60.74     | 61.0300       | 0.47          |
| Total                               | 1.0000             | Total                               | 1.0000    | 1.0001        |               |
| <b>Variable</b>                     | <b>Integration</b> | <b>1127</b>                         |           | <b>Design</b> | <b>%Error</b> |
| <b>Component (%mol)</b>             |                    | <b>Component (%mol)</b>             |           |               |               |
| Hydrogen                            | 0.0000             | Hydrogen                            | 0.0000    | 0.0000        |               |
| Methane                             | 0.0000             | Methane                             | 0.0000    | 0.0000        |               |
| Propadiene                          | 0.0032             | Propadiene/Methylacetylene          | 0.0032    | 0.0032        | 0.00          |
| Propene                             | 0.0002             | Propylene                           | 0.0002    | 0.0002        | 0.00          |
| Propane                             | 0.0016             | Propane                             | 0.0016    | 0.0016        | 0.00          |
| 13-Butadiene                        | 0.0010             | Butadiene/C4 Acetylene              | 0.0010    | 0.0010        | 0.00          |
| 1-Butene                            | 0.7366             | Butylenes                           | 0.7366    | 0.7366        | 0.00          |
| n-Butane                            | 0.2517             | Butanes                             | 0.2517    | 0.2517        | 0.00          |
| 1-Pentene                           | 0.0029             | C5-Hydrocarbons                     | 0.0029    | 0.0029        | 0.00          |
| Cyclohexane                         | 0.0000             | C6 Non-Aromatics                    | 0.0000    | 0.0000        |               |
| n-Heptane                           | 0.0000             | C7 Non-Aromatics                    | 0.0000    | 0.0000        |               |
| n-Octane                            | 0.0000             | C8 Non-Aromatics                    | 0.0000    | 0.0000        |               |
| Benzene                             | 0.0000             | Benzene                             | 0.0000    | 0.0000        |               |
| Water                               | 0.0028             | Steam/Water                         | 0.0028    | 0.0028        | 0.00          |
| Nitrogen                            | 0.0000             | Nitrogen                            | 0.0000    | 0.0000        |               |
| <b>Operation Condition</b>          |                    | <b>Operation Condition</b>          |           |               |               |
| Temperature (°C)                    | 42.00              | Temperature (°C)                    | 42.00     | 42.0000       | 0.00          |
| Pressure (Kg/cm <sup>2</sup> gauge) | 10.97              | Pressure (Kg/cm <sup>2</sup> gauge) | 10.97     | 10.9700       | 0.00          |
| Molar Flow (kgmole/h)               | 342.00             | Molar Flow (kgmole/h)               | 342.00    | 342.0000      | 0.00          |
| Mass Flow (kg/h)                    | 19314.00           | Mass Flow (kg/h)                    | 19314.00  | 19314.0000    | 0.00          |
| Molecular Weight                    | 56.4738            | Molecular Weight                    | 56.47     | 56.4700       | -0.01         |
| Total                               | 1.0000             | Total                               | 1.0000    | 1.0000        |               |

**Simulation Report – ECC 860 KTA**  
**Working Stage 6**

| Variable                            | Integration | 1106                                |           | Design      | %Error |
|-------------------------------------|-------------|-------------------------------------|-----------|-------------|--------|
| Component (%mol)                    |             | Component (%mol)                    |           |             |        |
| Hydrogen                            | 0.0133      | Hydrogen                            | 0.0133    | 0.0130      | -1.96  |
| Methane                             | 0.0164      | Methane                             | 0.0164    | 0.0152      | -8.07  |
| Propadiene                          | 0.0004      | Propadiene/Methylacetylene          | 0.0004    | 0.0004      | 9.96   |
| Propene                             | 0.0001      | Propylene                           | 0.0001    | 0.0008      | 83.74  |
| Propane                             | 0.0037      | Propane                             | 0.0037    | 0.0030      | -23.00 |
| 13-Butadiene                        | 0.0097      | Butadiene/C4 Acetylene              | 0.0097    | 0.0096      | -0.71  |
| 1-Butene                            | 0.0767      | Butylenes                           | 0.0767    | 0.0770      | 0.45   |
| n-Butane                            | 0.6205      | Butanes                             | 0.6205    | 0.6249      | 0.70   |
| 1-Pentene                           | 0.2502      | C5-Hydrocarbons                     | 0.2502    | 0.2459      | -1.75  |
| Cyclohexane                         | 0.0065      | C6 Non-Aromatics                    | 0.0065    | 0.0066      | 1.23   |
| n-Heptane                           | 0.0000      | C7 Non-Aromatics                    | 0.0000    | 0.0000      |        |
| n-Octane                            | 0.0000      | C8 Non-Aromatics                    | 0.0000    | 0.0000      |        |
| Benzene                             | 0.0007      | Benzene                             | 0.0007    | 0.0007      | 1.89   |
| Water                               | 0.0017      | Steam/Water                         | 0.0017    | 0.0027      | 36.71  |
| Nitrogen                            | 0.0002      | Nitrogen                            | 0.0002    | 0.0001      | -75.27 |
| Operation Condition                 |             | Operation Condition                 |           |             |        |
| Temperature (°C)                    | 72.38       | Temperature (°C)                    | 72.38     | 73.2000     | 1.12   |
| Pressure (Kg/cm <sup>2</sup> gauge) | 28.00       | Pressure (Kg/cm <sup>2</sup> gauge) | 28.00     | 28.0000     | 0.00   |
| Molar Flow (kgmole/h)               | 5774.75     | Molar Flow (kgmole/h)               | 5774.75   | 5748.6000   | -0.45  |
| Mass Flow (kg/h)                    | 343887.11   | Mass Flow (kg/h)                    | 343887.11 | 343561.0000 | -0.09  |
| Molecular Weight                    | 59.5501     | Molecular Weight                    | 59.55     | 59.7600     | 0.35   |
| Total                               | 1.0000      | Total                               | 1.0000    | 0.9999      |        |
| Variable                            | Integration | 1104                                |           | Design      | %Error |
| Component (%mol)                    |             | Component (%mol)                    |           |             |        |
| Hydrogen                            | 0.9650      | Hydrogen                            | 0.9650    | 0.9650      | 0.00   |
| Methane                             | 0.0341      | Methane                             | 0.0341    | 0.0341      | 0.00   |
| Propadiene                          | 0.0000      | Propadiene/Methylacetylene          | 0.0000    | 0.0000      |        |
| Propene                             | 0.0000      | Propylene                           | 0.0000    | 0.0000      |        |
| Propane                             | 0.0000      | Propane                             | 0.0000    | 0.0000      |        |
| 13-Butadiene                        | 0.0000      | Butadiene/C4 Acetylene              | 0.0000    | 0.0000      |        |
| 1-Butene                            | 0.0000      | Butylenes                           | 0.0000    | 0.0000      |        |
| n-Butane                            | 0.0000      | Butanes                             | 0.0000    | 0.0000      |        |
| 1-Pentene                           | 0.0000      | C5-Hydrocarbons                     | 0.0000    | 0.0000      |        |
| Cyclohexane                         | 0.0000      | C6 Non-Aromatics                    | 0.0000    | 0.0000      |        |
| n-Heptane                           | 0.0000      | C7 Non-Aromatics                    | 0.0000    | 0.0000      |        |
| n-Octane                            | 0.0000      | C8 Non-Aromatics                    | 0.0000    | 0.0000      |        |
| Benzene                             | 0.0000      | Benzene                             | 0.0000    | 0.0000      |        |
| Water                               | 0.0000      | Steam/Water                         | 0.0000    | 0.0000      |        |
| Nitrogen                            | 0.0009      | Nitrogen                            | 0.0009    | 0.0009      | 0.00   |
| Operation Condition                 |             | Operation Condition                 |           |             |        |

**Simulation Report – ECC 860 KTA**  
**Working Stage 6**

|                                     |                    |                                     |          |               |               |
|-------------------------------------|--------------------|-------------------------------------|----------|---------------|---------------|
| Temperature (°C)                    | 15.99              | Temperature (°C)                    | 15.99    | 16.0000       | 0.04          |
| Pressure (Kg/cm <sup>2</sup> gauge) | 30.28              | Pressure (Kg/cm <sup>2</sup> gauge) | 30.28    | 30.2800       | 0.00          |
| Molar Flow (kgmole/h)               | 27.80              | Molar Flow (kgmole/h)               | 27.80    | 27.8000       | -0.01         |
| Mass Flow (kg/h)                    | 70.00              | Mass Flow (kg/h)                    | 70.00    | 70.0000       | 0.00          |
| Molecular Weight                    | 2.5177             | Molecular Weight                    | 2.52     | 2.5200        | 0.09          |
| Total                               | 1.0000             | Total                               | 1.0000   | 1.0000        |               |
| <b>Variable</b>                     | <b>Integration</b> | <b>1107</b>                         |          | <b>Design</b> | <b>%Error</b> |
| <b>Component (%mol)</b>             |                    | <b>Component (%mol)</b>             |          |               |               |
| Hydrogen                            | 0.0893             | Hydrogen                            | 0.0893   | 0.0890        | -0.30         |
| Methane                             | 0.0554             | Methane                             | 0.0554   | 0.0500        | -10.89        |
| Propadiene                          | 0.0000             | Propadiene/Methylacetylene          | 0.0000   | 0.0000        |               |
| Propene                             | 0.0002             | Propylene                           | 0.0002   | 0.0013        | 84.95         |
| Propane                             | 0.0058             | Propane                             | 0.0058   | 0.0044        | -31.31        |
| 13-Butadiene                        | 0.0000             | Butadiene/C4 Acetylene              | 0.0000   | 0.0000        |               |
| 1-Butene                            | 0.0208             | Butylenes                           | 0.0208   | 0.0200        | -3.81         |
| n-Butane                            | 0.6547             | Butanes                             | 0.6547   | 0.6768        | 3.27          |
| 1-Pentene                           | 0.1665             | C5-Hydrocarbons                     | 0.1665   | 0.1484        | -12.22        |
| Cyclohexane                         | 0.0022             | C6 Non-Aromatics                    | 0.0022   | 0.0025        | 11.49         |
| n-Heptane                           | 0.0000             | C7 Non-Aromatics                    | 0.0000   | 0.0000        |               |
| n-Octane                            | 0.0000             | C8 Non-Aromatics                    | 0.0000   | 0.0000        |               |
| Benzene                             | 0.0003             | Benzene                             | 0.0003   | 0.0003        | 13.79         |
| Water                               | 0.0040             | Steam/Water                         | 0.0040   | 0.0065        | 38.83         |
| Nitrogen                            | 0.0009             | Nitrogen                            | 0.0009   | 0.0007        | -25.94        |
| <b>Operation Condition</b>          |                    | <b>Operation Condition</b>          |          |               |               |
| Temperature (°C)                    | 123.20             | Temperature (°C)                    | 123.20   | 123.2000      | 0.00          |
| Pressure (Kg/cm <sup>2</sup> gauge) | 26.00              | Pressure (Kg/cm <sup>2</sup> gauge) | 26.00    | 26.0000       | 0.00          |
| Molar Flow (kgmole/h)               | 1471.93            | Molar Flow (kgmole/h)               | 1471.93  | 1474.0000     | 0.14          |
| Mass Flow (kg/h)                    | 77325.30           | Mass Flow (kg/h)                    | 77325.30 | 77623.0000    | 0.38          |
| Molecular Weight                    | 52.5332            | Molecular Weight                    | 52.53    | 52.6600       | 0.24          |
| Total                               | 1.0000             | Total                               | 1.0000   | 0.9999        |               |

**Table A.5.3. EBR Stream Compositions**

| <b>Variable</b>                     | <b>Integration</b> | <b>5223 NEW</b>                     |        | <b>Design</b> | <b>%Error</b> |
|-------------------------------------|--------------------|-------------------------------------|--------|---------------|---------------|
| <b>Component (%mol)</b>             |                    | <b>Component (%mol)</b>             |        |               |               |
| Hydrogen                            | 0.0043             | Hydrogen                            | 0.0043 | 0.0041        | -3.97         |
| Methane                             | 0.1670             | Methane                             | 0.1670 | 0.1585        | -5.38         |
| Ethylene                            | 0.3482             | Ethylene                            | 0.3482 | 0.3388        | -2.77         |
| Propylene                           | 0.4805             | Propylene                           | 0.4805 | 0.4986        | 3.62          |
| <b>Operation Condition</b>          |                    | <b>Operation Condition</b>          |        |               |               |
| Temperature (°C)                    | -43.36             | Temperature (°C)                    | -43.36 | -43.1000      | -0.61         |
| Pressure (Kg/cm <sup>2</sup> gauge) | 0.54               | Pressure (Kg/cm <sup>2</sup> gauge) | 0.54   | 0.5400        | 0.00          |

**Simulation Report – ECC 860 KTA**  
**Working Stage 6**

|                                     |                    |                                     |           |               |               |
|-------------------------------------|--------------------|-------------------------------------|-----------|---------------|---------------|
| Molar Flow (kgmole/h)               | 1481.54            | Molar Flow (kgmole/h)               | 1481.54   | 1190.8000     | -24.42        |
| Mass Flow (kg/h)                    | 48412.62           | Mass Flow (kg/h)                    | 48412.62  | 39339.0000    | -23.07        |
| Molecular Weight                    | 32.6772            | Molecular Weight                    | 32.68     | 33.0400       | 1.10          |
| Total                               | 1.0000             | Total                               | 1.0000    | 1.0000        |               |
| <b>Variable</b>                     | <b>Integration</b> | <b>5238</b>                         |           | <b>Design</b> | <b>%Error</b> |
| <b>Component (%mol)</b>             |                    | <b>Component (%mol)</b>             |           |               |               |
| Hydrogen                            | 0.0001             | Hydrogen                            | 0.0001    | 0.0001        | 0.00          |
| Methane                             | 0.0139             | Methane                             | 0.0139    | 0.0139        | 0.00          |
| Ethylene                            | 0.1148             | Ethylene                            | 0.1148    | 0.1148        | 0.00          |
| Propylene                           | 0.8712             | Propylene                           | 0.8712    | 0.8712        | 0.00          |
| <b>Operation Condition</b>          |                    | <b>Operation Condition</b>          |           |               |               |
| Temperature (°C)                    | -30.00             | Temperature (°C)                    | -30.00    | -30.0000      | 0.00          |
| Pressure (Kg/cm <sup>2</sup> gauge) | 23.10              | Pressure (Kg/cm <sup>2</sup> gauge) | 23.10     | 23.1000       | 0.00          |
| Molar Flow (kgmole/h)               | 2924.14            | Molar Flow (kgmole/h)               | 2924.14   | 2924.0000     | 0.00          |
| Mass Flow (kg/h)                    | 117271.00          | Mass Flow (kg/h)                    | 117271.00 | 117271.0000   | 0.00          |
| Molecular Weight                    | 40.1044            | Molecular Weight                    | 40.10     | 40.1100       | 0.01          |
| Total                               | 1.0000             | Total                               | 1.0000    | 1.0000        |               |
| <b>Variable</b>                     | <b>Integration</b> | <b>5237</b>                         |           | <b>Design</b> | <b>%Error</b> |
| <b>Component (%mol)</b>             |                    | <b>Component (%mol)</b>             |           |               |               |
| Hydrogen                            | 0.0001             | Hydrogen                            | 0.0001    | 0.0001        | 0.00          |
| Methane                             | 0.0139             | Methane                             | 0.0139    | 0.0139        | 0.00          |
| Ethylene                            | 0.1148             | Ethylene                            | 0.1148    | 0.1148        | 0.00          |
| Propylene                           | 0.8712             | Propylene                           | 0.8712    | 0.8712        | 0.00          |
| <b>Operation Condition</b>          |                    | <b>Operation Condition</b>          |           |               |               |
| Temperature (°C)                    | -22.90             | Temperature (°C)                    | -22.90    | -22.9000      | 0.00          |
| Pressure (Kg/cm <sup>2</sup> gauge) | 1.76               | Pressure (Kg/cm <sup>2</sup> gauge) | 1.76      | 1.7600        | 0.00          |
| Molar Flow (kgmole/h)               | 567.07             | Molar Flow (kgmole/h)               | 567.07    | 567.1000      | 0.01          |
| Mass Flow (kg/h)                    | 22742.00           | Mass Flow (kg/h)                    | 22742.00  | 22743.0000    | 0.00          |
| Molecular Weight                    | 40.1044            | Molecular Weight                    | 40.10     | 40.1100       | 0.01          |
| Total                               | 1.0000             | Total                               | 1.0000    | 1.0000        |               |
| <b>Variable</b>                     | <b>Integration</b> | <b>5203</b>                         |           | <b>Design</b> | <b>%Error</b> |
| <b>Component (%mol)</b>             |                    | <b>Component (%mol)</b>             |           |               |               |
| Hydrogen                            | 0.0013             | Hydrogen                            | 0.0013    | 0.0014        | 4.27          |
| Methane                             | 0.0595             | Methane                             | 0.0595    | 0.0595        | -0.03         |
| Ethylene                            | 0.1843             | Ethylene                            | 0.1843    | 0.1843        | -0.02         |
| Propylene                           | 0.7548             | Propylene                           | 0.7548    | 0.7548        | 0.00          |
| <b>Operation Condition</b>          |                    | <b>Operation Condition</b>          |           |               |               |
| Temperature (°C)                    | 47.10              | Temperature (°C)                    | 47.10     | 47.1000       | 0.00          |
| Pressure (Kg/cm <sup>2</sup> gauge) | 7.04               | Pressure (Kg/cm <sup>2</sup> gauge) | 7.04      | 7.0400        | 0.00          |
| Molar Flow (kgmole/h)               | 4972.75            | Molar Flow (kgmole/h)               | 4972.75   | 4972.2000     | -0.01         |
| Mass Flow (kg/h)                    | 188425.62          | Mass Flow (kg/h)                    | 188425.62 | 188407.0000   | -0.01         |
| Molecular Weight                    | 37.8916            | Molecular Weight                    | 37.89     | 37.8900       | 0.00          |
| Total                               | 1.0000             | Total                               | 1.0000    | 1.0000        |               |

# Simulation Report – ECC 860 KTA

## Working Stage 6

| Variable                            | Integration | 5243                                |           | Design      | %Error |
|-------------------------------------|-------------|-------------------------------------|-----------|-------------|--------|
| Component (%mol)                    |             | Component (%mol)                    |           |             |        |
| Hydrogen                            | 0.0007      | Hydrogen                            | 0.0007    | 0.0007      | 0.21   |
| Methane                             | 0.0403      | Methane                             | 0.0403    | 0.0402      | -0.17  |
| Ethylene                            | 0.1682      | Ethylene                            | 0.1682    | 0.1678      | -0.26  |
| Propylene                           | 0.7908      | Propylene                           | 0.7908    | 0.7914      | 0.08   |
| Operation Condition                 |             | Operation Condition                 |           |             |        |
| Temperature (°C)                    | 21.60       | Temperature (°C)                    | 21.60     | 21.6000     | 0.00   |
| Pressure (Kg/cm <sup>2</sup> gauge) | 6.69        | Pressure (Kg/cm <sup>2</sup> gauge) | 6.69      | 6.6900      | 0.00   |
| Molar Flow (kgmole/h)               | 10298.95    | Molar Flow (kgmole/h)               | 10298.95  | 10295.9000  | -0.03  |
| Mass Flow (kg/h)                    | 397996.62   | Mass Flow (kg/h)                    | 397996.62 | 397978.0000 | 0.00   |
| Molecular Weight                    | 38.6444     | Molecular Weight                    | 38.64     | 38.6500     | 0.01   |
| Total                               | 1.0000      | Total                               | 1.0000    | 1.0001      |        |
| Variable                            | Integration | 5207                                |           | Design      | %Error |
| Component (%mol)                    |             | Component (%mol)                    |           |             |        |
| Hydrogen                            | 0.0001      | Hydrogen                            | 0.0001    | 0.0001      | 1.77   |
| Methane                             | 0.0146      | Methane                             | 0.0146    | 0.0139      | -4.76  |
| Ethylene                            | 0.1180      | Ethylene                            | 0.1180    | 0.1148      | -2.78  |
| Propylene                           | 0.8673      | Propylene                           | 0.8673    | 0.8712      | 0.44   |
| Operation Condition                 |             | Operation Condition                 |           |             |        |
| Temperature (°C)                    | 37.34       | Temperature (°C)                    | 37.34     | 37.3000     | -0.10  |
| Pressure (Kg/cm <sup>2</sup> gauge) | 23.45       | Pressure (Kg/cm <sup>2</sup> gauge) | 23.45     | 23.4500     | 0.00   |
| Molar Flow (kgmole/h)               | 6580.54     | Molar Flow (kgmole/h)               | 6580.54   | 6571.2000   | -0.14  |
| Mass Flow (kg/h)                    | 263500.70   | Mass Flow (kg/h)                    | 263500.70 | 263548.0000 | 0.02   |
| Molecular Weight                    | 40.0424     | Molecular Weight                    | 40.04     | 40.1100     | 0.17   |
| Total                               | 1.0000      | Total                               | 1.0000    | 1.0000      |        |
| Variable                            | Integration | 5226                                |           | Design      | %Error |
| Component (%mol)                    |             | Component (%mol)                    |           |             |        |
| Hydrogen                            | 0.0001      | Hydrogen                            | 0.0001    | 0.0001      | 1.64   |
| Methane                             | 0.0145      | Methane                             | 0.0145    | 0.0139      | -4.51  |
| Ethylene                            | 0.1176      | Ethylene                            | 0.1176    | 0.1148      | -2.47  |
| Propylene                           | 0.8677      | Propylene                           | 0.8677    | 0.8712      | 0.40   |
| Operation Condition                 |             | Operation Condition                 |           |             |        |
| Temperature (°C)                    | 10.00       | Temperature (°C)                    | 10.00     | 10.0000     | 0.00   |
| Pressure (Kg/cm <sup>2</sup> gauge) | 7.83        | Pressure (Kg/cm <sup>2</sup> gauge) | 7.83      | 7.8300      | 0.00   |
| Molar Flow (kgmole/h)               | 1784.12     | Molar Flow (kgmole/h)               | 1784.12   | 1781.5000   | -0.15  |
| Mass Flow (kg/h)                    | 71451.00    | Mass Flow (kg/h)                    | 71451.00  | 71451.0000  | 0.00   |
| Molecular Weight                    | 40.0483     | Molecular Weight                    | 40.05     | 40.1100     | 0.15   |
| Total                               | 1.0000      | Total                               | 1.0000    | 1.0000      |        |
| Variable                            | Integration | 5208                                |           | Design      | %Error |
| Component (%mol)                    |             | Component (%mol)                    |           |             |        |
| Hydrogen                            | 0.0018      | Hydrogen                            | 0.0018    | 0.0018      | 2.17   |
| Methane                             | 0.0858      | Methane                             | 0.0858    | 0.0865      | 0.86   |

**Simulation Report – ECC 860 KTA**  
**Working Stage 6**

|                                     |                    |                                     |           |               |               |
|-------------------------------------|--------------------|-------------------------------------|-----------|---------------|---------------|
| Ethylene                            | 0.2571             | Ethylene                            | 0.2571    | 0.2611        | 1.52          |
| Propylene                           | 0.6553             | Propylene                           | 0.6553    | 0.6505        | -0.74         |
| <b>Operation Condition</b>          |                    | <b>Operation Condition</b>          |           |               |               |
| Temperature (°C)                    | 37.34              | Temperature (°C)                    | 37.34     | 37.3000       | -0.10         |
| Pressure (Kg/cm <sup>2</sup> gauge) | 23.45              | Pressure (Kg/cm <sup>2</sup> gauge) | 23.45     | 23.4500       | 0.00          |
| Molar Flow (kgmole/h)               | 3718.40            | Molar Flow (kgmole/h)               | 3718.40   | 3724.7000     | 0.17          |
| Mass Flow (kg/h)                    | 134495.91          | Mass Flow (kg/h)                    | 134495.91 | 134430.0000   | -0.05         |
| Molecular Weight                    | 36.1703            | Molecular Weight                    | 36.17     | 36.0900       | -0.22         |
| Total                               | 1.0000             | Total                               | 1.0000    | 0.9999        |               |
| <b>Variable</b>                     | <b>Integration</b> | <b>5239</b>                         |           | <b>Design</b> | <b>%Error</b> |
| <b>Component (%mol)</b>             |                    | <b>Component (%mol)</b>             |           |               |               |
| Hydrogen                            | 0.0001             | Hydrogen                            | 0.0001    | 0.0001        | 0.00          |
| Methane                             | 0.0139             | Methane                             | 0.0139    | 0.0139        | 0.00          |
| Ethylene                            | 0.1148             | Ethylene                            | 0.1148    | 0.1148        | 0.00          |
| Propylene                           | 0.8712             | Propylene                           | 0.8712    | 0.8712        | 0.00          |
| <b>Operation Condition</b>          |                    | <b>Operation Condition</b>          |           |               |               |
| Temperature (°C)                    | -37.50             | Temperature (°C)                    | -37.50    | -37.5000      | 0.00          |
| Pressure (Kg/cm <sup>2</sup> gauge) | 0.54               | Pressure (Kg/cm <sup>2</sup> gauge) | 0.54      | 0.5400        | 0.00          |
| Molar Flow (kgmole/h)               | 2924.14            | Molar Flow (kgmole/h)               | 2924.14   | 2924.0000     | 0.00          |
| Mass Flow (kg/h)                    | 117271.00          | Mass Flow (kg/h)                    | 117271.00 | 117271.0000   | 0.00          |
| Molecular Weight                    | 40.1044            | Molecular Weight                    | 40.10     | 40.1100       | 0.01          |
| Total                               | 1.0000             | Total                               | 1.0000    | 1.0000        |               |
| <b>Variable</b>                     | <b>Integration</b> | <b>5236</b>                         |           | <b>Design</b> | <b>%Error</b> |
| <b>Component (%mol)</b>             |                    | <b>Component (%mol)</b>             |           |               |               |
| Hydrogen                            | 0.0001             | Hydrogen                            | 0.0001    | 0.0001        | 0.00          |
| Methane                             | 0.0139             | Methane                             | 0.0139    | 0.0139        | 0.00          |
| Ethylene                            | 0.1148             | Ethylene                            | 0.1148    | 0.1148        | 0.00          |
| Propylene                           | 0.8712             | Propylene                           | 0.8712    | 0.8712        | 0.00          |
| <b>Operation Condition</b>          |                    | <b>Operation Condition</b>          |           |               |               |
| Temperature (°C)                    | -30.00             | Temperature (°C)                    | -30.00    | -30.0000      | 0.00          |
| Pressure (Kg/cm <sup>2</sup> gauge) | 23.10              | Pressure (Kg/cm <sup>2</sup> gauge) | 23.10     | 23.1000       | 0.00          |
| Molar Flow (kgmole/h)               | 567.07             | Molar Flow (kgmole/h)               | 567.07    | 567.1000      | 0.01          |
| Mass Flow (kg/h)                    | 22742.00           | Mass Flow (kg/h)                    | 22742.00  | 22743.0000    | 0.00          |
| Molecular Weight                    | 40.1044            | Molecular Weight                    | 40.10     | 40.1100       | 0.01          |
| Total                               | 1.0000             | Total                               | 1.0000    | 1.0000        |               |
| <b>Variable</b>                     | <b>Integration</b> | <b>5201</b>                         |           | <b>Design</b> | <b>%Error</b> |
| <b>Component (%mol)</b>             |                    | <b>Component (%mol)</b>             |           |               |               |
| Hydrogen                            | 0.0015             | Hydrogen                            | 0.0015    | 0.0015        | 0.01          |
| Methane                             | 0.0654             | Methane                             | 0.0654    | 0.0654        | 0.01          |
| Ethylene                            | 0.1933             | Ethylene                            | 0.1933    | 0.1933        | 0.01          |
| Propylene                           | 0.7398             | Propylene                           | 0.7398    | 0.7399        | 0.01          |
| <b>Operation Condition</b>          |                    | <b>Operation Condition</b>          |           |               |               |
| Temperature (°C)                    | -39.54             | Temperature (°C)                    | -39.54    | -39.5000      | -0.09         |

# Simulation Report – ECC 860 KTA

## Working Stage 6

|                                     |                    |                                     |           |               |               |
|-------------------------------------|--------------------|-------------------------------------|-----------|---------------|---------------|
| Pressure (Kg/cm <sup>2</sup> gauge) | 0.45               | Pressure (Kg/cm <sup>2</sup> gauge) | 0.45      | 0.4500        | 0.00          |
| Molar Flow (kgmole/h)               | 4405.68            | Molar Flow (kgmole/h)               | 4405.68   | 4405.1000     | -0.01         |
| Mass Flow (kg/h)                    | 165683.62          | Mass Flow (kg/h)                    | 165683.62 | 165665.0000   | -0.01         |
| Molecular Weight                    | 37.6068            | Molecular Weight                    | 37.61     | 37.6100       | 0.01          |
| Total                               | 1.0000             | Total                               | 1.0000    | 1.0001        |               |
| <b>Variable</b>                     | <b>Integration</b> | <b>5241</b>                         |           | <b>Design</b> | <b>%Error</b> |
| <b>Component (%mol)</b>             |                    | <b>Component (%mol)</b>             |           |               |               |
| Hydrogen                            | 0.0013             | Hydrogen                            | 0.0013    | 0.0014        | 4.27          |
| Methane                             | 0.0595             | Methane                             | 0.0595    | 0.0595        | -0.03         |
| Ethylene                            | 0.1843             | Ethylene                            | 0.1843    | 0.1843        | -0.02         |
| Propylene                           | 0.7548             | Propylene                           | 0.7548    | 0.7548        | 0.00          |
| <b>Operation Condition</b>          |                    | <b>Operation Condition</b>          |           |               |               |
| Temperature (°C)                    | 38.00              | Temperature (°C)                    | 38.00     | 38.0000       | 0.00          |
| Pressure (Kg/cm <sup>2</sup> gauge) | 6.83               | Pressure (Kg/cm <sup>2</sup> gauge) | 6.83      | 6.8300        | 0.00          |
| Molar Flow (kgmole/h)               | 4972.75            | Molar Flow (kgmole/h)               | 4972.75   | 4972.2000     | -0.01         |
| Mass Flow (kg/h)                    | 188425.62          | Mass Flow (kg/h)                    | 188425.62 | 188407.0000   | -0.01         |
| Molecular Weight                    | 37.8916            | Molecular Weight                    | 37.89     | 37.8900       | 0.00          |
| Total                               | 1.0000             | Total                               | 1.0000    | 1.0000        |               |
| <b>Variable</b>                     | <b>Integration</b> | <b>5205</b>                         |           | <b>Design</b> | <b>%Error</b> |
| <b>Component (%mol)</b>             |                    | <b>Component (%mol)</b>             |           |               |               |
| Hydrogen                            | 0.0007             | Hydrogen                            | 0.0007    | 0.0007        | 0.21          |
| Methane                             | 0.0403             | Methane                             | 0.0403    | 0.0402        | -0.17         |
| Ethylene                            | 0.1682             | Ethylene                            | 0.1682    | 0.1678        | -0.26         |
| Propylene                           | 0.7908             | Propylene                           | 0.7908    | 0.7914        | 0.08          |
| <b>Operation Condition</b>          |                    | <b>Operation Condition</b>          |           |               |               |
| Temperature (°C)                    | 90.21              | Temperature (°C)                    | 90.21     | 90.2000       | -0.01         |
| Pressure (Kg/cm <sup>2</sup> gauge) | 24.14              | Pressure (Kg/cm <sup>2</sup> gauge) | 24.14     | 24.1400       | 0.00          |
| Molar Flow (kgmole/h)               | 10298.95           | Molar Flow (kgmole/h)               | 10298.95  | 10295.9000    | -0.03         |
| Mass Flow (kg/h)                    | 397996.62          | Mass Flow (kg/h)                    | 397996.62 | 397978.0000   | 0.00          |
| Molecular Weight                    | 38.6444            | Molecular Weight                    | 38.64     | 38.6500       | 0.01          |
| Total                               | 1.0000             | Total                               | 1.0000    | 1.0001        |               |
| <b>Variable</b>                     | <b>Integration</b> | <b>5227</b>                         |           | <b>Design</b> | <b>%Error</b> |
| <b>Component (%mol)</b>             |                    | <b>Component (%mol)</b>             |           |               |               |
| Hydrogen                            | 0.0001             | Hydrogen                            | 0.0001    | 0.0001        | 1.77          |
| Methane                             | 0.0146             | Methane                             | 0.0146    | 0.0139        | -4.76         |
| Ethylene                            | 0.1180             | Ethylene                            | 0.1180    | 0.1148        | -2.78         |
| Propylene                           | 0.8673             | Propylene                           | 0.8673    | 0.8712        | 0.44          |
| <b>Operation Condition</b>          |                    | <b>Operation Condition</b>          |           |               |               |
| Temperature (°C)                    | 37.34              | Temperature (°C)                    | 37.34     | 37.2000       | -0.37         |
| Pressure (Kg/cm <sup>2</sup> gauge) | 23.45              | Pressure (Kg/cm <sup>2</sup> gauge) | 23.45     | 23.3800       | -0.30         |
| Molar Flow (kgmole/h)               | 4796.16            | Molar Flow (kgmole/h)               | 4796.16   | 4789.7000     | -0.13         |
| Mass Flow (kg/h)                    | 192049.70          | Mass Flow (kg/h)                    | 192049.70 | 192097.0000   | 0.02          |
| Molecular Weight                    | 40.0424            | Molecular Weight                    | 40.04     | 40.1100       | 0.17          |

**Simulation Report – ECC 860 KTA**  
**Working Stage 6**

|                                     |                    |                                     |           |               |               |
|-------------------------------------|--------------------|-------------------------------------|-----------|---------------|---------------|
| Total                               | 1.0000             | Total                               | 1.0000    | 1.0000        |               |
| <b>Variable</b>                     | <b>Integration</b> | <b>5242</b>                         |           | <b>Design</b> | <b>%Error</b> |
| <b>Component (%mol)</b>             |                    | <b>Component (%mol)</b>             |           |               |               |
| Hydrogen                            | 0.0007             | Hydrogen                            | 0.0007    | 0.0007        | 0.21          |
| Methane                             | 0.0403             | Methane                             | 0.0403    | 0.0402        | -0.17         |
| Ethylene                            | 0.1682             | Ethylene                            | 0.1682    | 0.1678        | -0.26         |
| Propylene                           | 0.7908             | Propylene                           | 0.7908    | 0.7914        | 0.08          |
| <b>Operation Condition</b>          |                    | <b>Operation Condition</b>          |           |               |               |
| Temperature (°C)                    | 31.70              | Temperature (°C)                    | 31.70     | 31.6000       | -0.32         |
| Pressure (Kg/cm <sup>2</sup> gauge) | 6.83               | Pressure (Kg/cm <sup>2</sup> gauge) | 6.83      | 6.8300        | 0.00          |
| Molar Flow (kgmole/h)               | 10298.95           | Molar Flow (kgmole/h)               | 10298.95  | 10295.9000    | -0.03         |
| Mass Flow (kg/h)                    | 397996.62          | Mass Flow (kg/h)                    | 397996.62 | 397978.0000   | 0.00          |
| Molecular Weight                    | 38.6444            | Molecular Weight                    | 38.64     | 38.6500       | 0.01          |
| Total                               | 1.0000             | Total                               | 1.0000    | 1.0001        |               |
| <b>Variable</b>                     | <b>Integration</b> | <b>5225</b>                         |           | <b>Design</b> | <b>%Error</b> |
| <b>Component (%mol)</b>             |                    | <b>Component (%mol)</b>             |           |               |               |
| Hydrogen                            | 0.0001             | Hydrogen                            | 0.0001    | 0.0001        | 1.77          |
| Methane                             | 0.0146             | Methane                             | 0.0146    | 0.0139        | -4.76         |
| Ethylene                            | 0.1180             | Ethylene                            | 0.1180    | 0.1148        | -2.78         |
| Propylene                           | 0.8673             | Propylene                           | 0.8673    | 0.8712        | 0.44          |
| <b>Operation Condition</b>          |                    | <b>Operation Condition</b>          |           |               |               |
| Temperature (°C)                    | 37.34              | Temperature (°C)                    | 37.34     | 37.2000       | -0.37         |
| Pressure (Kg/cm <sup>2</sup> gauge) | 23.45              | Pressure (Kg/cm <sup>2</sup> gauge) | 23.45     | 23.3800       | -0.30         |
| Molar Flow (kgmole/h)               | 1784.38            | Molar Flow (kgmole/h)               | 1784.38   | 1781.5000     | -0.16         |
| Mass Flow (kg/h)                    | 71451.00           | Mass Flow (kg/h)                    | 71451.00  | 71451.0000    | 0.00          |
| Molecular Weight                    | 40.0424            | Molecular Weight                    | 40.04     | 40.1100       | 0.17          |
| Total                               | 1.0000             | Total                               | 1.0000    | 1.0000        |               |
| <b>Variable</b>                     | <b>Integration</b> | <b>5235</b>                         |           | <b>Design</b> | <b>%Error</b> |
| <b>Component (%mol)</b>             |                    | <b>Component (%mol)</b>             |           |               |               |
| Hydrogen                            | 0.0001             | Hydrogen                            | 0.0001    | 0.0001        | 0.00          |
| Methane                             | 0.0139             | Methane                             | 0.0139    | 0.0139        | 0.00          |
| Ethylene                            | 0.1148             | Ethylene                            | 0.1148    | 0.1148        | 0.00          |
| Propylene                           | 0.8712             | Propylene                           | 0.8712    | 0.8712        | 0.00          |
| <b>Operation Condition</b>          |                    | <b>Operation Condition</b>          |           |               |               |
| Temperature (°C)                    | -30.00             | Temperature (°C)                    | -30.00    | -30.0000      | 0.00          |
| Pressure (Kg/cm <sup>2</sup> gauge) | 23.10              | Pressure (Kg/cm <sup>2</sup> gauge) | 23.10     | 23.1000       | 0.00          |
| Molar Flow (kgmole/h)               | 3491.21            | Molar Flow (kgmole/h)               | 3491.21   | 3491.0000     | -0.01         |
| Mass Flow (kg/h)                    | 140013.00          | Mass Flow (kg/h)                    | 140013.00 | 140013.0000   | 0.00          |
| Molecular Weight                    | 40.1044            | Molecular Weight                    | 40.10     | 40.1100       | 0.01          |
| Total                               | 1.0000             | Total                               | 1.0000    | 1.0000        |               |
| <b>Variable</b>                     | <b>Integration</b> | <b>5240</b>                         |           | <b>Design</b> | <b>%Error</b> |
| <b>Component (%mol)</b>             |                    | <b>Component (%mol)</b>             |           |               |               |
| Hydrogen                            | 0.0015             | Hydrogen                            | 0.0015    | 0.0015        | 0.01          |



**Simulation Report – ECC 860 KTA**  
**Working Stage 6**

|                                     |                    |                                     |           |               |               |
|-------------------------------------|--------------------|-------------------------------------|-----------|---------------|---------------|
| Methane                             | 0.0654             | Methane                             | 0.0654    | 0.0654        | 0.01          |
| Ethylene                            | 0.1933             | Ethylene                            | 0.1933    | 0.1933        | 0.01          |
| Propylene                           | 0.7398             | Propylene                           | 0.7398    | 0.7399        | 0.01          |
| <b>Operation Condition</b>          |                    | <b>Operation Condition</b>          |           |               |               |
| Temperature (°C)                    | -39.33             | Temperature (°C)                    | -39.33    | -39.3000      | -0.07         |
| Pressure (Kg/cm <sup>2</sup> gauge) | 0.54               | Pressure (Kg/cm <sup>2</sup> gauge) | 0.54      | 0.5400        | 0.00          |
| Molar Flow (kgmole/h)               | 4405.68            | Molar Flow (kgmole/h)               | 4405.68   | 4405.1000     | -0.01         |
| Mass Flow (kg/h)                    | 165683.62          | Mass Flow (kg/h)                    | 165683.62 | 165665.0000   | -0.01         |
| Molecular Weight                    | 37.6068            | Molecular Weight                    | 37.61     | 37.6100       | 0.01          |
| Total                               | 1.0000             | Total                               | 1.0000    | 1.0001        |               |
| <b>Variable</b>                     | <b>Integration</b> | <b>5202</b>                         |           | <b>Design</b> | <b>%Error</b> |
| <b>Component (%mol)</b>             |                    | <b>Component (%mol)</b>             |           |               |               |
| Hydrogen                            | 0.0001             | Hydrogen                            | 0.0001    | 0.0001        | 0.00          |
| Methane                             | 0.0139             | Methane                             | 0.0139    | 0.0139        | 0.00          |
| Ethylene                            | 0.1148             | Ethylene                            | 0.1148    | 0.1148        | 0.00          |
| Propylene                           | 0.8712             | Propylene                           | 0.8712    | 0.8712        | 0.00          |
| <b>Operation Condition</b>          |                    | <b>Operation Condition</b>          |           |               |               |
| Temperature (°C)                    | -23.10             | Temperature (°C)                    | -23.10    | -23.2000      | 0.42          |
| Pressure (Kg/cm <sup>2</sup> gauge) | 1.67               | Pressure (Kg/cm <sup>2</sup> gauge) | 1.67      | 1.6700        | 0.00          |
| Molar Flow (kgmole/h)               | 567.07             | Molar Flow (kgmole/h)               | 567.07    | 567.1000      | 0.01          |
| Mass Flow (kg/h)                    | 22742.00           | Mass Flow (kg/h)                    | 22742.00  | 22743.0000    | 0.00          |
| Molecular Weight                    | 40.1044            | Molecular Weight                    | 40.10     | 40.1100       | 0.01          |
| Total                               | 1.0000             | Total                               | 1.0000    | 1.0000        |               |
| <b>Variable</b>                     | <b>Integration</b> | <b>5232</b>                         |           | <b>Design</b> | <b>%Error</b> |
| <b>Component (%mol)</b>             |                    | <b>Component (%mol)</b>             |           |               |               |
| Hydrogen                            | 0.0001             | Hydrogen                            | 0.0001    | 0.0001        | -0.01         |
| Methane                             | 0.0262             | Methane                             | 0.0262    | 0.0262        | -0.01         |
| Ethylene                            | 0.1711             | Ethylene                            | 0.1711    | 0.1711        | -0.01         |
| Propylene                           | 0.8026             | Propylene                           | 0.8026    | 0.8025        | -0.01         |
| <b>Operation Condition</b>          |                    | <b>Operation Condition</b>          |           |               |               |
| Temperature (°C)                    | 35.00              | Temperature (°C)                    | 35.00     | 35.0000       | 0.00          |
| Pressure (Kg/cm <sup>2</sup> gauge) | 6.83               | Pressure (Kg/cm <sup>2</sup> gauge) | 6.83      | 6.8300        | 0.00          |
| Molar Flow (kgmole/h)               | 3542.07            | Molar Flow (kgmole/h)               | 3542.07   | 3542.2000     | 0.00          |
| Mass Flow (kg/h)                    | 138120.00          | Mass Flow (kg/h)                    | 138120.00 | 138120.0000   | 0.00          |
| Molecular Weight                    | 38.9941            | Molecular Weight                    | 38.99     | 38.9900       | -0.01         |
| Total                               | 1.0000             | Total                               | 1.0000    | 0.9999        |               |
| <b>Variable</b>                     | <b>Integration</b> | <b>5206</b>                         |           | <b>Design</b> | <b>%Error</b> |
| <b>Component (%mol)</b>             |                    | <b>Component (%mol)</b>             |           |               |               |
| Hydrogen                            | 0.0007             | Hydrogen                            | 0.0007    | 0.0007        | 0.21          |
| Methane                             | 0.0403             | Methane                             | 0.0403    | 0.0402        | -0.17         |
| Ethylene                            | 0.1682             | Ethylene                            | 0.1682    | 0.1678        | -0.26         |
| Propylene                           | 0.7908             | Propylene                           | 0.7908    | 0.7914        | 0.08          |
| <b>Operation Condition</b>          |                    | <b>Operation Condition</b>          |           |               |               |

# Simulation Report – ECC 860 KTA

## Working Stage 6

|                                     |                    |                                     |           |               |               |
|-------------------------------------|--------------------|-------------------------------------|-----------|---------------|---------------|
| Temperature (°C)                    | 38.01              | Temperature (°C)                    | 38.01     | 38.0000       | -0.01         |
| Pressure (Kg/cm <sup>2</sup> gauge) | 23.88              | Pressure (Kg/cm <sup>2</sup> gauge) | 23.88     | 23.8800       | 0.00          |
| Molar Flow (kgmole/h)               | 10298.95           | Molar Flow (kgmole/h)               | 10298.95  | 10295.9000    | -0.03         |
| Mass Flow (kg/h)                    | 397996.62          | Mass Flow (kg/h)                    | 397996.62 | 397978.0000   | 0.00          |
| Molecular Weight                    | 38.6444            | Molecular Weight                    | 38.64     | 38.6500       | 0.01          |
| Total                               | 1.0000             | Total                               | 1.0000    | 1.0001        |               |
| <b>Variable</b>                     | <b>Integration</b> | <b>5228</b>                         |           | <b>Design</b> | <b>%Error</b> |
| <b>Component (%mol)</b>             |                    | <b>Component (%mol)</b>             |           |               |               |
| Hydrogen                            | 0.0001             | Hydrogen                            | 0.0001    | 0.0001        | 1.77          |
| Methane                             | 0.0146             | Methane                             | 0.0146    | 0.0139        | -4.76         |
| Ethylene                            | 0.1180             | Ethylene                            | 0.1180    | 0.1148        | -2.78         |
| Propylene                           | 0.8673             | Propylene                           | 0.8673    | 0.8712        | 0.44          |
| <b>Operation Condition</b>          |                    | <b>Operation Condition</b>          |           |               |               |
| Temperature (°C)                    | 7.40               | Temperature (°C)                    | 7.40      | 7.4000        | 0.00          |
| Pressure (Kg/cm <sup>2</sup> gauge) | 23.24              | Pressure (Kg/cm <sup>2</sup> gauge) | 23.24     | 23.2400       | 0.00          |
| Molar Flow (kgmole/h)               | 4796.16            | Molar Flow (kgmole/h)               | 4796.16   | 4789.7000     | -0.13         |
| Mass Flow (kg/h)                    | 192049.70          | Mass Flow (kg/h)                    | 192049.70 | 192097.0000   | 0.02          |
| Molecular Weight                    | 40.0424            | Molecular Weight                    | 40.04     | 40.1100       | 0.17          |
| Total                               | 1.0000             | Total                               | 1.0000    | 1.0000        |               |
| <b>Variable</b>                     | <b>Integration</b> | <b>5204</b>                         |           | <b>Design</b> | <b>%Error</b> |
| <b>Component (%mol)</b>             |                    | <b>Component (%mol)</b>             |           |               |               |
| Hydrogen                            | 0.0007             | Hydrogen                            | 0.0007    | 0.0007        | 0.21          |
| Methane                             | 0.0403             | Methane                             | 0.0403    | 0.0402        | -0.17         |
| Ethylene                            | 0.1682             | Ethylene                            | 0.1682    | 0.1678        | -0.26         |
| Propylene                           | 0.7908             | Propylene                           | 0.7908    | 0.7914        | 0.08          |
| <b>Operation Condition</b>          |                    | <b>Operation Condition</b>          |           |               |               |
| Temperature (°C)                    | 21.46              | Temperature (°C)                    | 21.46     | 21.5000       | 0.19          |
| Pressure (Kg/cm <sup>2</sup> gauge) | 6.60               | Pressure (Kg/cm <sup>2</sup> gauge) | 6.60      | 6.6000        | 0.00          |
| Molar Flow (kgmole/h)               | 10298.95           | Molar Flow (kgmole/h)               | 10298.95  | 10295.9000    | -0.03         |
| Mass Flow (kg/h)                    | 397996.62          | Mass Flow (kg/h)                    | 397996.62 | 397978.0000   | 0.00          |
| Molecular Weight                    | 38.6444            | Molecular Weight                    | 38.64     | 38.6500       | 0.01          |
| Total                               | 1.0000             | Total                               | 1.0000    | 1.0001        |               |

**Table A.5.4. Py-Gas Hydrogenation Stream Compositions**

| <b>Variable</b>         | <b>Integration</b> | <b>4612</b>             |        | <b>Design</b> | <b>%Error</b> |
|-------------------------|--------------------|-------------------------|--------|---------------|---------------|
| <b>Component (%mol)</b> |                    | <b>Component (%mol)</b> |        |               |               |
| Hydrogen                | 0.0000             | Hydrogen                | 0.0000 | 0.0000        |               |
| Methane                 | 0.0000             | Methane                 | 0.0000 | 0.0000        |               |
| Acetylene               | 0.0000             | Acetylene               | 0.0000 | 0.0000        |               |
| Ethylene                | 0.0000             | Ethylene                | 0.0000 | 0.0000        |               |
| Ethane                  | 0.0000             | Ethane                  | 0.0000 | 0.0000        |               |
| Propadiene              | 0.0000             | Propadiene/Propyne      | 0.0000 | 0.0000        |               |
| Propene                 | 0.0000             | Propylene               | 0.0000 | 0.0000        |               |

**Simulation Report – ECC 860 KTA**  
**Working Stage 6**

|                                     |                    |                                     |          |               |               |
|-------------------------------------|--------------------|-------------------------------------|----------|---------------|---------------|
| Propane                             | 0.0000             | Propane                             | 0.0000   | 0.0000        |               |
| 13-Butadiene                        | 0.0083             | Butadienes/C4Acetylenes             | 0.0083   | 0.0083        | 0.00          |
| 1-Butene                            | 0.0089             | Butylenes                           | 0.0089   | 0.0089        | 0.00          |
| n-Butane                            | 0.0011             | Butanes                             | 0.0011   | 0.0011        | 0.00          |
| Cyclopentane                        | 0.2535             | C5-Hydrocarbons                     | 0.2535   | 0.2535        | 0.00          |
| 1-Hexyne                            | 0.0783             | C6 Non-Aromatics                    | 0.0783   | 0.0783        | 0.00          |
| n-Hexane                            | 0.0000             | C7 Non-Aromatics                    | 0.0322   | 0.0322        |               |
| 1-Heptyne                           | 0.0322             | C8 Non-Aromatics                    | 0.0126   | 0.0126        | 0.00          |
| n-Heptane                           | 0.0000             | Benzene                             | 0.2892   | 0.2892        |               |
| 1-Octyne                            | 0.0126             | Toluene                             | 0.1968   | 0.1968        | 0.00          |
| n-Octane                            | 0.0000             | Xylenes/Ethylbenzene                | 0.0392   | 0.0392        |               |
| Benzene                             | 0.2892             | Styrene                             | 0.0234   | 0.0234        | 0.00          |
| Toluene                             | 0.1968             | C9-205°C                            | 0.0551   | 0.0551        | 0.00          |
| p-Xylene                            | 0.0392             | 205-288°C PGO                       | 0.0014   | 0.0014        | 0.00          |
| E-Benzene                           | 0.0000             | Steam/Water                         | 0.0000   | 0.0000        |               |
| Styrene                             | 0.0234             | Nitrogen                            | 0.0000   | 0.0000        | #DIV/0!       |
| m-MStyrene                          | 0.0522             |                                     |          |               |               |
| n-Nonane                            | 0.0000             |                                     |          |               |               |
| n-Decane                            | 0.0029             |                                     |          |               |               |
| n-C <sub>11</sub>                   | 0.0000             |                                     |          |               |               |
| n-C <sub>12</sub>                   | 0.0014             |                                     |          |               |               |
| n-C <sub>13</sub>                   | 0.0000             |                                     |          |               |               |
| n-C <sub>14</sub>                   | 0.0000             |                                     |          |               |               |
| Steam/Water                         | 0.0000             |                                     |          |               |               |
| Nitrogen                            | 0.0000             |                                     |          |               |               |
| <b>Operation Condition</b>          |                    | <b>Operation Condition</b>          |          |               |               |
| Temperature (°C)                    | 40.00              | Temperature (°C)                    | 40.00    | 40            | 0.00          |
| Pressure (Kg/cm <sup>2</sup> gauge) | 3.00               | Pressure (Kg/cm <sup>2</sup> gauge) | 3.00     | 3             | 0.00          |
| Molar Flow (kgmole/h)               | 817.44             | Molar Flow (kgmole/h)               | 817.44   | 817.5         | 0.01          |
| Mass Flow (kg/h)                    | 68543.00           | Mass Flow (kg/h)                    | 68543.00 | 68543         | 0.00          |
| Molecular Weight                    | 83.8506            | Molecular Weight                    | 83.8506  | 83.85         | 0.00          |
| Total                               | 0.9957             | Total                               | 1.0000   | 1.0000        |               |
| <b>Variable</b>                     | <b>Integration</b> | <b>1201</b>                         |          | <b>Design</b> | <b>%Error</b> |
| <b>Component (%mol)</b>             |                    | <b>Component (%mol)</b>             |          |               |               |
| Hydrogen                            | 0.9645             | Hydrogen                            | 0.9645   | 0.9645        | 0.00          |
| Methane                             | 0.0340             | Methane                             | 0.0340   | 0.0340        | 0.00          |
| Acetylene                           | 0.0000             | Acetylene                           | 0.0000   | 0.0000        | #DIV/0!       |
| Ethylene                            | 0.0000             | Ethylene                            | 0.0000   | 0.0000        |               |
| Ethane                              | 0.0000             | Ethane                              | 0.0000   | 0.0000        |               |
| Propadiene                          | 0.0000             | Propadiene/Propyne                  | 0.0000   | 0.0000        |               |
| Propene                             | 0.0000             | Propylene                           | 0.0000   | 0.0000        |               |
| Propane                             | 0.0000             | Propane                             | 0.0000   | 0.0000        |               |

**Simulation Report – ECC 860 KTA**  
**Working Stage 6**

|                                     |                    |                                     |               |               |        |
|-------------------------------------|--------------------|-------------------------------------|---------------|---------------|--------|
| 13-Butadiene                        | 0.0000             | Butadienes/C4Acetylenes             | 0.0000        | 0.0000        |        |
| 1-Butene                            | 0.0000             | Butylenes                           | 0.0000        | 0.0000        |        |
| n-Butane                            | 0.0000             | Butanes                             | 0.0000        | 0.0000        |        |
| Cyclopentane                        | 0.0000             | C5-Hydrocarbons                     | 0.0000        | 0.0000        |        |
| 1-Hexyne                            | 0.0000             | C6 Non-Aromatics                    | 0.0000        | 0.0000        |        |
| n-Hexane                            | 0.0000             | C7 Non-Aromatics                    | 0.0000        | 0.0000        |        |
| 1-Heptyne                           | 0.0000             | C8 Non-Aromatics                    | 0.0000        | 0.0000        |        |
| n-Heptane                           | 0.0000             | Benzene                             | 0.0000        | 0.0000        |        |
| 1-Octyne                            | 0.0000             | Toluene                             | 0.0000        | 0.0000        |        |
| n-Octane                            | 0.0000             | Xylenes/Ethylbenzene                | 0.0000        | 0.0000        |        |
| Benzene                             | 0.0000             | Styrene                             | 0.0000        | 0.0000        |        |
| Toluene                             | 0.0000             | C9+ Hydrocarbons                    | 0.0000        | 0.0000        |        |
| p-Xylene                            |                    | Steam/Water                         | 0.0000        | 0.0006        |        |
| E-Benzene                           | 0.0000             | Nitrogen                            | 0.0000        | 0.0009        |        |
| Styrene                             | 0.0000             |                                     |               |               |        |
| m-MStyrene                          | 0.0000             |                                     |               |               |        |
| n-Nonane                            | 0.0000             |                                     |               |               |        |
| n-Decane                            | 0.0000             |                                     |               |               |        |
| n-C <sub>11</sub>                   | 0.0000             |                                     |               |               |        |
| n-C <sub>12</sub>                   | 0.0000             |                                     |               |               |        |
| n-C <sub>13</sub>                   | 0.0000             |                                     |               |               |        |
| n-C <sub>14</sub>                   | 0.0000             |                                     |               |               |        |
| Steam/Water                         | 0.0006             |                                     |               |               |        |
| Nitrogen                            | 0.0009             |                                     |               |               |        |
| <b>Operation Condition</b>          |                    | <b>Operation Condition</b>          |               |               |        |
| Temperature (°C)                    | 16.00              | Temperature (°C)                    | 16.00         | 16            | 0.00   |
| Pressure (Kg/cm <sup>2</sup> gauge) | 31.36              | Pressure (Kg/cm <sup>2</sup> gauge) | 31.36         | 31.36         | 0.00   |
| Molar Flow (kgmole/h)               | 306.03             | Molar Flow (kgmole/h)               | 306.03        | 306.1         | 0.02   |
| Mass Flow (kg/h)                    | 773.00             | Mass Flow (kg/h)                    | 773.00        | 773           | 0.00   |
| Molecular Weight                    | 2.5259             | Molecular Weight                    | 2.5259        | 2.53          | 0.16   |
| Total                               | 0.9985             | Total                               | 0.9985        | 1.0000        |        |
| <b>Variable</b>                     | <b>Integration</b> | <b>1233</b>                         | <b>Design</b> | <b>%Error</b> |        |
| <b>Component (%mol)</b>             |                    | <b>Component (%mol)</b>             |               |               |        |
| Hydrogen                            | 0.0017             | Hydrogen                            | 0.0017        | 0.0018        | 2.86   |
| Methane                             | 0.0067             | Methane                             | 0.0067        | 0.0047        | -41.81 |
| Acetylene                           | 0.0000             | Acetylene                           | 0.0000        | 0.0000        |        |
| Ethylene                            | 0.0000             | Ethylene                            | 0.0000        | 0.0000        |        |
| Ethane                              | 0.0000             | Ethane                              | 0.0000        | 0.0000        |        |
| Propadiene                          | 0.0000             | Propadiene/Propyne                  | 0.0000        | 0.0000        |        |
| Propene                             | 0.0000             | Propylene                           | 0.0000        | 0.0000        |        |
| Propane                             | 0.0000             | Propane                             | 0.0000        | 0.0000        |        |
| 13-Butadiene                        | 0.0013             | Butadienes/C4Acetylenes             | 0.0013        | 0.0010        | -32.92 |

**Simulation Report – ECC 860 KTA**  
**Working Stage 6**

|                                     |                    |                                     |          |               |               |
|-------------------------------------|--------------------|-------------------------------------|----------|---------------|---------------|
| 1-Butene                            | 0.0154             | Butylenes                           | 0.0154   | 0.0156        | 1.03          |
| n-Butane                            | 0.0011             | Butanes                             | 0.0011   | 0.0019        | 43.43         |
| Cyclopentane                        | 0.2508             | C5-Hydrocarbons                     | 0.2508   | 0.2498        | -0.42         |
| 1-Hexyne                            | 0.0611             | C6 Non-Aromatics                    | 0.0611   | 0.0790        | 22.60         |
| n-Hexane                            | 0.0165             | C7 Non-Aromatics                    | 0.0165   | 0.0323        | 49.02         |
| 1-Heptyne                           | 0.0072             | C8 Non-Aromatics                    | 0.0072   | 0.0126        | 42.56         |
| n-Heptane                           | 0.0247             | Benzene                             | 0.0247   | 0.2871        | 91.39         |
| 1-Octyne                            | 0.0099             | Toluene                             | 0.0099   | 0.1956        | 94.96         |
| n-Octane                            | 0.0027             | Xylenes/Ethylbenzene                | 0.0027   | 0.0616        | 95.68         |
| Benzene                             | 0.2868             | Styrene                             | 0.2868   | 0.0007        | -<br>40876.44 |
| Toluene                             | 0.1954             | C9+ Hydrocarbons                    | 0.1954   | 0.0561        | -248.33       |
| p-Xylene                            | 0.0389             | Steam/Water                         | 0.0389   | 0.0002        | -<br>19371.40 |
| E-Benzene                           | 0.0224             | Nitrogen                            | 0.0224   | 0.0000        | #DIV/0!       |
| Styrene                             | 0.0008             |                                     |          |               |               |
| m-MStyrene                          | 0.0069             |                                     |          |               |               |
| n-Nonane                            | 0.0450             |                                     |          |               |               |
| n-Decane                            | 0.0029             |                                     |          |               |               |
| n-C <sub>11</sub>                   | 0.0000             |                                     |          |               |               |
| n-C <sub>12</sub>                   | 0.0014             |                                     |          |               |               |
| n-C <sub>13</sub>                   | 0.0000             |                                     |          |               |               |
| n-C <sub>14</sub>                   | 0.0000             |                                     |          |               |               |
| Steam/Water                         | 0.0002             |                                     |          |               |               |
| Nitrogen                            | 0.0001             |                                     |          |               |               |
| <b>Operation Condition</b>          |                    | <b>Operation Condition</b>          |          |               |               |
| Temperature (°C)                    | 45.06              | Temperature (°C)                    | 45.06    | 45.2          | 0.32          |
| Pressure (Kg/cm <sup>2</sup> gauge) | 2.61               | Pressure (Kg/cm <sup>2</sup> gauge) | 2.61     | 2.61          | 0.00          |
| Molar Flow (kgmole/h)               | 822.43             | Molar Flow (kgmole/h)               | 822.43   | 822.1         | -0.04         |
| Mass Flow (kg/h)                    | 69045.88           | Mass Flow (kg/h)                    | 69045.88 | 68950         | -0.14         |
| Molecular Weight                    | 83.9539            | Molecular Weight                    | 83.9539  | 83.87         | -0.10         |
| Total                               | 0.9955             | Total                               | 0.9428   | 1.0000        |               |
| <b>Variable</b>                     | <b>Integration</b> | <b>1205</b>                         |          | <b>Design</b> | <b>%Error</b> |
| <b>Component (%mol)</b>             |                    | <b>Component (%mol)</b>             |          |               |               |
| Hydrogen                            | 0.0143             | Hydrogen                            | 0.0143   | 0.0144        | 0.82          |
| Methane                             | 0.0117             | Methane                             | 0.0117   | 0.0057        | -105.36       |
| Acetylene                           | 0.0000             | Acetylene                           | 0.0000   | 0.0000        |               |
| Ethylene                            | 0.0000             | Ethylene                            | 0.0000   | 0.0000        |               |
| Ethane                              | 0.0000             | Ethane                              | 0.0000   | 0.0000        |               |
| Propadiene                          | 0.0000             | Propadiene/Propyne                  | 0.0000   | 0.0000        |               |
| Propene                             | 0.0000             | Propylene                           | 0.0000   | 0.0000        |               |
| Propane                             | 0.0000             | Propane                             | 0.0000   | 0.0000        |               |
| 13-Butadiene                        | 0.0013             | Butadienes/C4Acetylenes             | 0.0013   | 0.0009        | -46.59        |

**Simulation Report – ECC 860 KTA**  
**Working Stage 6**

|                                     |                    |                                     |           |               |               |
|-------------------------------------|--------------------|-------------------------------------|-----------|---------------|---------------|
| 1-Butene                            | 0.0153             | Butylenes                           | 0.0153    | 0.0140        | -9.46         |
| n-Butane                            | 0.0011             | Butanes                             | 0.0011    | 0.0017        | 37.35         |
| Cyclopentane                        | 0.2465             | C5-Hydrocarbons                     | 0.2465    | 0.2380        | -3.57         |
| 1-Hexyne                            | 0.0600             | C6 Non-Aromatics                    | 0.0600    | 0.0778        | 22.83         |
| n-Hexane                            | 0.0162             | C7 Non-Aromatics                    | 0.0162    | 0.0323        | 49.94         |
| 1-Heptyne                           | 0.0071             | C8 Non-Aromatics                    | 0.0071    | 0.0128        | 44.51         |
| n-Heptane                           | 0.0243             | Benzene                             | 0.0243    | 0.2845        | 91.47         |
| 1-Octyne                            | 0.0097             | Toluene                             | 0.0097    | 0.1970        | 95.09         |
| n-Octane                            | 0.0026             | Xylenes/Ethylbenzene                | 0.0026    | 0.0626        | 95.83         |
| Benzene                             | 0.2816             | Styrene                             | 0.2816    | 0.0007        | -<br>40123.94 |
| Toluene                             | 0.1918             | C9+ Hydrocarbons                    | 0.1918    | 0.0574        | -234.08       |
| p-Xylene                            | 0.0382             | Steam/Water                         | 0.0382    | 0.0002        | -<br>19006.85 |
| E-Benzene                           | 0.0220             | Nitrogen                            | 0.0220    | 0.0001        | -<br>21893.55 |
| Styrene                             | 0.0008             |                                     |           |               |               |
| m-MStyrene                          | 0.0068             |                                     |           |               |               |
| n-Nonane                            | 0.0441             |                                     |           |               |               |
| n-Decane                            | 0.0028             |                                     |           |               |               |
| n-C <sub>11</sub>                   | 0.0000             |                                     |           |               |               |
| n-C <sub>12</sub>                   | 0.0014             |                                     |           |               |               |
| n-C <sub>13</sub>                   | 0.0000             |                                     |           |               |               |
| n-C <sub>14</sub>                   | 0.0000             |                                     |           |               |               |
| Steam/Water                         | 0.0002             |                                     |           |               |               |
| Nitrogen                            | 0.0003             |                                     |           |               |               |
| <b>Operation Condition</b>          |                    | <b>Operation Condition</b>          |           |               |               |
| Temperature (°C)                    | 159.04             | Temperature (°C)                    | 159.04    | 159.8         | 0.47          |
| Pressure (Kg/cm <sup>2</sup> gauge) | 30.50              | Pressure (Kg/cm <sup>2</sup> gauge) | 30.50     | 29.53         | -3.28         |
| Molar Flow (kgmole/h)               | 3461.86            | Molar Flow (kgmole/h)               | 3461.86   | 3299.8        | -4.91         |
| Mass Flow (kg/h)                    | 285765.71          | Mass Flow (kg/h)                    | 285765.71 | 274172        | -4.23         |
| Molecular Weight                    | 82.5469            | Molecular Weight                    | 82.5469   | 83.09         | 0.65          |
| Total                               | 0.9512             | Total                               | 0.9436    | 1.0001        |               |
| <b>Variable</b>                     | <b>Integration</b> | <b>1208</b>                         |           | <b>Design</b> | <b>%Error</b> |
| <b>Component (%mol)</b>             |                    | <b>Component (%mol)</b>             |           |               |               |
| Hydrogen                            | 0.0148             | Hydrogen                            | 0.0148    | 0.0558        | 73.42         |
| Methane                             | 0.0119             | Methane                             | 0.0119    | 0.0119        | -0.12         |
| Acetylene                           | 0.0000             | Acetylene                           | 0.0000    | 0.0000        |               |
| Ethylene                            | 0.0000             | Ethylene                            | 0.0000    | 0.0000        |               |
| Ethane                              | 0.0000             | Ethane                              | 0.0000    | 0.0000        |               |
| Propadiene                          | 0.0000             | Propadiene/Propyne                  | 0.0000    | 0.0000        |               |
| Propene                             | 0.0000             | Propylene                           | 0.0000    | 0.0000        |               |
| Propane                             | 0.0000             | Propane                             | 0.0000    | 0.0000        |               |

**Simulation Report – ECC 860 KTA**  
**Working Stage 6**

|                                     |                    |                                     |          |               |               |
|-------------------------------------|--------------------|-------------------------------------|----------|---------------|---------------|
| 13-Butadiene                        | 0.0013             | Butadienes/C4Acetylenes             | 0.0013   | 0.0009        | -46.60        |
| 1-Butene                            | 0.0153             | Butylenes                           | 0.0153   | 0.0149        | -2.97         |
| n-Butane                            | 0.0011             | Butanes                             | 0.0011   | 0.0018        | 40.78         |
| Cyclopentane                        | 0.2464             | C5-Hydrocarbons                     | 0.2464   | 0.2352        | -4.76         |
| 1-Hexyne                            | 0.0600             | C6 Non-Aromatics                    | 0.0600   | 0.0741        | 19.04         |
| n-Hexane                            | 0.0162             | C7 Non-Aromatics                    | 0.0162   | 0.0303        | 46.66         |
| 1-Heptyne                           | 0.0071             | C8 Non-Aromatics                    | 0.0071   | 0.0118        | 39.87         |
| n-Heptane                           | 0.0242             | Benzene                             | 0.0242   | 0.2690        | 90.99         |
| 1-Octyne                            | 0.0097             | Toluene                             | 0.0097   | 0.1831        | 94.72         |
| n-Octane                            | 0.0026             | Xylenes/Ethylbenzene                | 0.0026   | 0.0576        | 95.48         |
| Benzene                             | 0.2813             | Styrene                             | 0.2813   | 0.0007        | -<br>40090.73 |
| Toluene                             | 0.1916             | C9+ Hydrocarbons                    | 0.1916   | 0.0525        | -264.87       |
| p-Xylene                            | 0.0382             | Steam/Water                         | 0.0382   | 0.0002        | -<br>18983.51 |
| E-Benzene                           | 0.0220             | Nitrogen                            | 0.0220   | 0.0003        | -7222.33      |
| Styrene                             | 0.0008             |                                     |          |               |               |
| m-MStyrene                          | 0.0068             |                                     |          |               |               |
| n-Nonane                            | 0.0441             |                                     |          |               |               |
| n-Decane                            | 0.0028             |                                     |          |               |               |
| n-C <sub>11</sub>                   | 0.0000             |                                     |          |               |               |
| n-C <sub>12</sub>                   | 0.0014             |                                     |          |               |               |
| n-C <sub>13</sub>                   | 0.0000             |                                     |          |               |               |
| n-C <sub>14</sub>                   | 0.0000             |                                     |          |               |               |
| Steam/Water                         | 0.0002             |                                     |          |               |               |
| Nitrogen                            | 0.0003             |                                     |          |               |               |
| <b>Operation Condition</b>          |                    | <b>Operation Condition</b>          |          |               |               |
| Temperature (°C)                    | 44.15              | Temperature (°C)                    | 44.15    | 44.2          | 0.12          |
| Pressure (Kg/cm <sup>2</sup> gauge) | 25.10              | Pressure (Kg/cm <sup>2</sup> gauge) | 25.10    | 25.1          | 0.00          |
| Molar Flow (kgmole/h)               | 839.22             | Molar Flow (kgmole/h)               | 839.22   | 878.7         | 4.49          |
| Mass Flow (kg/h)                    | 69221.09           | Mass Flow (kg/h)                    | 69221.09 | 69316         | 0.14          |
| Molecular Weight                    | 82.4824            | Molecular Weight                    | 82.4824  | 78.89         | -4.55         |
| Total                               | 0.9953             | Total                               | 0.9437   | 1.0001        |               |
| <b>Variable</b>                     | <b>Integration</b> | <b>1246</b>                         |          | <b>Design</b> | <b>%Error</b> |
| <b>Component (%mol)</b>             |                    | <b>Component (%mol)</b>             |          |               |               |
| Hydrogen                            | 0.5791             | Hydrogen                            | 0.5791   | 0.6604        | 12.31         |
| Methane                             | 0.3263             | Methane                             | 0.3263   | 0.2328        | -40.17        |
| Acetylene                           | 0.0000             | Acetylene                           | 0.0000   | 0.0000        |               |
| Ethylene                            | 0.0000             | Ethylene                            | 0.0000   | 0.0000        |               |
| Ethane                              | 0.0000             | Ethane                              | 0.0000   | 0.0000        |               |
| Propadiene                          | 0.0000             | Propadiene/Propyne                  | 0.0000   | 0.0000        |               |
| Propene                             | 0.0000             | Propylene                           | 0.0000   | 0.0000        |               |
| Propane                             | 0.0000             | Propane                             | 0.0000   | 0.0000        |               |

**Simulation Report – ECC 860 KTA**  
**Working Stage 6**

|                                     |                    |                                     |               |               |          |
|-------------------------------------|--------------------|-------------------------------------|---------------|---------------|----------|
| 13-Butadiene                        | 0.0011             | Butadienes/C4Acetylenes             | 0.0011        | 0.0005        | -116.44  |
| 1-Butene                            | 0.0137             | Butylenes                           | 0.0137        | 0.0125        | -9.78    |
| n-Butane                            | 0.0008             | Butanes                             | 0.0008        | 0.0015        | 45.40    |
| Cyclopentane                        | 0.0372             | C5-Hydrocarbons                     | 0.0372        | 0.0606        | 38.60    |
| 1-Hexyne                            | 0.0045             | C6 Non-Aromatics                    | 0.0045        | 0.0059        | 23.74    |
| n-Hexane                            | 0.0015             | C7 Non-Aromatics                    | 0.0015        | 0.0009        | -67.64   |
| 1-Heptyne                           | 0.0002             | C8 Non-Aromatics                    | 0.0002        | 0.0001        | -94.65   |
| n-Heptane                           | 0.0008             | Benzene                             | 0.0008        | 0.0152        | 94.52    |
| 1-Octyne                            | 0.0001             | Toluene                             | 0.0001        | 0.0034        | 96.88    |
| n-Octane                            | 0.0000             | Xylenes/Ethylbenzene                | 0.0000        | 0.0004        | 91.25    |
| Benzene                             | 0.0156             | Styrene                             | 0.0156        | 0.0000        | #DIV/0!  |
| Toluene                             | 0.0036             | C9+ Hydrocarbons                    | 0.0036        | 0.0001        | -3463.67 |
| p-Xylene                            | 0.0002             | Steam/Water                         | 0.0002        | 0.0006        | 61.06    |
| E-Benzene                           | 0.0002             | Nitrogen                            | 0.0002        | 0.0052        | 96.98    |
| Styrene                             | 0.0000             |                                     |               |               |          |
| m-MStyrene                          | 0.0000             |                                     |               |               |          |
| n-Nonane                            | 0.0002             |                                     |               |               |          |
| n-Decane                            | 0.0000             |                                     |               |               |          |
| n-C <sub>11</sub>                   | 0.0000             |                                     |               |               |          |
| n-C <sub>12</sub>                   | 0.0000             |                                     |               |               |          |
| n-C <sub>13</sub>                   | 0.0000             |                                     |               |               |          |
| n-C <sub>14</sub>                   | 0.0000             |                                     |               |               |          |
| Steam/Water                         | 0.0025             |                                     |               |               |          |
| Nitrogen                            | 0.0123             |                                     |               |               |          |
| <b>Operation Condition</b>          |                    | <b>Operation Condition</b>          |               |               |          |
| Temperature (°C)                    | 43.92              | Temperature (°C)                    | 43.92         | 44.3          | 0.86     |
| Pressure (Kg/cm <sup>2</sup> gauge) | 0.47               | Pressure (Kg/cm <sup>2</sup> gauge) | 0.47          | 0.47          | 0.00     |
| Molar Flow (kgmole/h)               | 11.61              | Molar Flow (kgmole/h)               | 11.61         | 9.3           | -24.81   |
| Mass Flow (kg/h)                    | 145.24             | Mass Flow (kg/h)                    | 145.24        | 115           | -26.30   |
| Molecular Weight                    | 12.5128            | Molecular Weight                    | 12.5128       | 12.43         | -0.67    |
| Total                               | 0.9852             | Total                               | 0.9849        | 1.0001        |          |
| <b>Variable</b>                     | <b>Integration</b> | <b>1202</b>                         | <b>Design</b> | <b>%Error</b> |          |
| <b>Component (%mol)</b>             |                    | <b>Component (%mol)</b>             |               |               |          |
| Hydrogen                            | 0.0116             | Hydrogen                            | 0.0116        | 0.0115        | -0.47    |
| Methane                             | 0.0095             | Methane                             | 0.0095        | 0.0045        | -110.43  |
| Acetylene                           | 0.0000             | Acetylene                           | 0.0000        | 0.0000        |          |
| Ethylene                            | 0.0000             | Ethylene                            | 0.0000        | 0.0000        |          |
| Ethane                              | 0.0000             | Ethane                              | 0.0000        | 0.0000        |          |
| Propadiene                          | 0.0000             | Propadiene/Propyne                  | 0.0000        | 0.0000        |          |
| Propene                             | 0.0000             | Propylene                           | 0.0000        | 0.0000        |          |
| Propane                             | 0.0000             | Propane                             | 0.0000        | 0.0000        |          |
| 13-Butadiene                        | 0.0027             | Butadienes/C4Acetylenes             | 0.0027        | 0.0025        | -6.11    |



**Simulation Report – ECC 860 KTA**  
**Working Stage 6**

|                                     |                    |                                     |           |               |               |
|-------------------------------------|--------------------|-------------------------------------|-----------|---------------|---------------|
| 1-Butene                            | 0.0141             | Butylenes                           | 0.0141    | 0.0130        | -8.44         |
| n-Butane                            | 0.0011             | Butanes                             | 0.0011    | 0.0016        | 33.02         |
| Cyclopentane                        | 0.2478             | C5-Hydrocarbons                     | 0.2478    | 0.2409        | -2.88         |
| 1-Hexyne                            | 0.0635             | C6 Non-Aromatics                    | 0.0635    | 0.0808        | 21.38         |
| n-Hexane                            | 0.0131             | C7 Non-Aromatics                    | 0.0131    | 0.0296        | 55.81         |
| 1-Heptyne                           | 0.0119             | C8 Non-Aromatics                    | 0.0119    | 0.0128        | 7.05          |
| n-Heptane                           | 0.0196             | Benzene                             | 0.0196    | 0.2853        | 93.12         |
| 1-Octyne                            | 0.0102             | Toluene                             | 0.0102    | 0.1969        | 94.80         |
| n-Octane                            | 0.0021             | Xylenes/Ethylbenzene                | 0.0021    | 0.0579        | 96.35         |
| Benzene                             | 0.2830             | Styrene                             | 0.2830    | 0.0052        | -5342.80      |
| Toluene                             | 0.1927             | C9+ Hydrocarbons                    | 0.1927    | 0.0572        | -236.93       |
| p-Xylene                            | 0.0384             | Steam/Water                         | 0.0384    | 0.0001        | -<br>38302.11 |
| E-Benzene                           | 0.0178             | Nitrogen                            | 0.0178    | 0.0001        | -<br>17692.29 |
| Styrene                             | 0.0051             |                                     |           |               |               |
| m-MStyrene                          | 0.0155             |                                     |           |               |               |
| n-Nonane                            | 0.0357             |                                     |           |               |               |
| n-Decane                            | 0.0028             |                                     |           |               |               |
| n-C <sub>11</sub>                   | 0.0000             |                                     |           |               |               |
| n-C <sub>12</sub>                   | 0.0014             |                                     |           |               |               |
| n-C <sub>13</sub>                   | 0.0000             |                                     |           |               |               |
| n-C <sub>14</sub>                   | 0.0000             |                                     |           |               |               |
| Steam/Water                         | 0.0002             |                                     |           |               |               |
| Nitrogen                            | 0.0002             |                                     |           |               |               |
| <b>Operation Condition</b>          |                    |                                     |           |               |               |
| Temperature (°C)                    | 139.54             | Temperature (°C)                    | 139.54    | 139.1         | -0.31         |
| Pressure (Kg/cm <sup>2</sup> gauge) | 28.00              | Pressure (Kg/cm <sup>2</sup> gauge) | 28.00     | 28            | 0.00          |
| Molar Flow (kgmole/h)               | 4279.30            | Molar Flow (kgmole/h)               | 4279.30   | 4118.6        | -3.90         |
| Mass Flow (kg/h)                    | 354308.71          | Mass Flow (kg/h)                    | 354308.71 | 342715        | -3.38         |
| Molecular Weight                    | 82.7960            | Molecular Weight                    | 82.7960   | 83.21         | 0.50          |
| Total                               | 0.9597             | Total                               | 0.9391    | 0.9999        |               |
| <b>Variable</b>                     | <b>Integration</b> | <b>1210</b>                         |           | <b>Design</b> | <b>%Error</b> |
| <b>Component (%mol)</b>             |                    | <b>Component (%mol)</b>             |           |               |               |
| Hydrogen                            | 0.8263             | Hydrogen                            | 0.8263    | 0.8757        | 5.64          |
| Methane                             | 0.1405             | Methane                             | 0.1405    | 0.0932        | -50.79        |
| Acetylene                           | 0.0000             | Acetylene                           | 0.0000    | 0.0000        |               |
| Ethylene                            | 0.0000             | Ethylene                            | 0.0000    | 0.0000        |               |
| Ethane                              | 0.0000             | Ethane                              | 0.0000    | 0.0000        |               |
| Propadiene                          | 0.0000             | Propadiene/Propyne                  | 0.0000    | 0.0000        |               |
| Propene                             | 0.0000             | Propylene                           | 0.0000    | 0.0000        |               |
| Propane                             | 0.0000             | Propane                             | 0.0000    | 0.0000        |               |
| 13-Butadiene                        | 0.0003             | Butadienes/C4Acetylenes             | 0.0003    | 0.0001        | -187.56       |

**Simulation Report – ECC 860 KTA**  
**Working Stage 6**

|                                     |                    |                                     |        |               |               |
|-------------------------------------|--------------------|-------------------------------------|--------|---------------|---------------|
| 1-Butene                            | 0.0037             | Butylenes                           | 0.0037 | 0.0033        | -10.78        |
| n-Butane                            | 0.0002             | Butanes                             | 0.0002 | 0.0004        | 45.02         |
| Cyclopentane                        | 0.0099             | C5-Hydrocarbons                     | 0.0099 | 0.0161        | 38.41         |
| 1-Hexyne                            | 0.0012             | C6 Non-Aromatics                    | 0.0012 | 0.0016        | 24.27         |
| n-Hexane                            | 0.0004             | C7 Non-Aromatics                    | 0.0004 | 0.0002        | -104.31       |
| 1-Heptyne                           | 0.0001             | C8 Non-Aromatics                    | 0.0001 | 0.0000        | #DIV/0!       |
| n-Heptane                           | 0.0002             | Benzene                             | 0.0002 | 0.0039        | 93.86         |
| 1-Octyne                            | 0.0000             | Toluene                             | 0.0000 | 0.0009        | 96.75         |
| n-Octane                            | 0.0000             | Xylenes/Ethylbenzene                | 0.0000 | 0.0001        | 90.29         |
| Benzene                             | 0.0042             | Styrene                             | 0.0042 | 0.0000        | #DIV/0!       |
| Toluene                             | 0.0010             | C9+ Hydrocarbons                    | 0.0010 | 0.0000        | #DIV/0!       |
| p-Xylene                            | 0.0001             | Steam/Water                         | 0.0001 | 0.0001        | 35.96         |
| E-Benzene                           | 0.0000             | Nitrogen                            | 0.0000 | 0.0043        | 99.00         |
| Styrene                             | 0.0000             |                                     |        |               |               |
| m-MStyrene                          | 0.0000             |                                     |        |               |               |
| n-Nonane                            | 0.0001             |                                     |        |               |               |
| n-Decane                            | 0.0000             |                                     |        |               |               |
| n-C <sub>11</sub>                   | 0.0000             |                                     |        |               |               |
| n-C <sub>12</sub>                   | 0.0000             |                                     |        |               |               |
| n-C <sub>13</sub>                   | 0.0000             |                                     |        |               |               |
| n-C <sub>14</sub>                   | 0.0000             |                                     |        |               |               |
| Steam/Water                         | 0.0008             |                                     |        |               |               |
| Nitrogen                            | 0.0110             |                                     |        |               |               |
| <b>Operation Condition</b>          |                    | <b>Operation Condition</b>          |        |               |               |
| Temperature (°C)                    | 44.15              | Temperature (°C)                    | 44.15  | 44.2          | 0.12          |
| Pressure (Kg/cm <sup>2</sup> gauge) | 25.10              | Pressure (Kg/cm <sup>2</sup> gauge) | 25.10  | 25.1          | 0.00          |
| Molar Flow (kgmole/h)               | 5.19               | Molar Flow (kgmole/h)               | 5.19   | 47.3          | 89.03         |
| Mass Flow (kg/h)                    | 29.97              | Mass Flow (kg/h)                    | 29.97  | 250           | 88.01         |
| Molecular Weight                    | 5.7754             | Molecular Weight                    | 5.7754 | 5.29          | -9.18         |
| Total                               | 0.9882             | Total                               | 0.9881 | 0.9999        |               |
| <b>Variable</b>                     | <b>Integration</b> | <b>1243</b>                         |        | <b>Design</b> | <b>%Error</b> |
| <b>Component (%mol)</b>             |                    | <b>Component (%mol)</b>             |        |               |               |
| Hydrogen                            | 0.8263             | Hydrogen                            | 0.8263 | 0.8757        | 5.64          |
| Methane                             | 0.1405             | Methane                             | 0.1405 | 0.0932        | -50.79        |
| Acetylene                           | 0.0000             | Acetylene                           | 0.0000 | 0.0000        |               |
| Ethylene                            | 0.0000             | Ethylene                            | 0.0000 | 0.0000        |               |
| Ethane                              | 0.0000             | Ethane                              | 0.0000 | 0.0000        |               |
| Propadiene                          | 0.0000             | Propadiene/Propyne                  | 0.0000 | 0.0000        |               |
| Propene                             | 0.0000             | Propylene                           | 0.0000 | 0.0000        |               |
| Propane                             | 0.0000             | Propane                             | 0.0000 | 0.0000        |               |
| 13-Butadiene                        | 0.0003             | Butadienes/C4Acetylenes             | 0.0003 | 0.0001        | -187.56       |
| 1-Butene                            | 0.0037             | Butylenes                           | 0.0037 | 0.0033        | -10.78        |

**Simulation Report – ECC 860 KTA**  
**Working Stage 6**

|                                     |        |                                     |        |        |         |
|-------------------------------------|--------|-------------------------------------|--------|--------|---------|
| n-Butane                            | 0.0002 | Butanes                             | 0.0002 | 0.0004 | 45.02   |
| Cyclopentane                        | 0.0099 | C5-Hydrocarbons                     | 0.0099 | 0.0161 | 38.41   |
| 1-Hexyne                            | 0.0012 | C6 Non-Aromatics                    | 0.0012 | 0.0016 | 24.27   |
| n-Hexane                            | 0.0004 | C7 Non-Aromatics                    | 0.0004 | 0.0002 | -104.31 |
| 1-Heptyne                           | 0.0001 | C8 Non-Aromatics                    | 0.0001 | 0.0000 | #DIV/0! |
| n-Heptane                           | 0.0002 | Benzene                             | 0.0002 | 0.0039 | 93.86   |
| 1-Octyne                            | 0.0000 | Toluene                             | 0.0000 | 0.0009 | 96.75   |
| n-Octane                            | 0.0000 | Xylenes/Ethylbenzene                | 0.0000 | 0.0001 | 90.29   |
| Benzene                             | 0.0042 | Styrene                             | 0.0042 | 0.0000 | #DIV/0! |
| Toluene                             | 0.0010 | C9+ Hydrocarbons                    | 0.0010 | 0.0000 | #DIV/0! |
| p-Xylene                            | 0.0001 | Steam/Water                         | 0.0001 | 0.0001 | 35.96   |
| E-Benzene                           | 0.0000 | Nitrogen                            | 0.0000 | 0.0043 | 99.00   |
| Styrene                             | 0.0000 |                                     |        |        |         |
| m-MStyrene                          | 0.0000 |                                     |        |        |         |
| n-Nonane                            | 0.0001 |                                     |        |        |         |
| n-Decane                            | 0.0000 |                                     |        |        |         |
| n-C <sub>11</sub>                   | 0.0000 |                                     |        |        |         |
| n-C <sub>12</sub>                   | 0.0000 |                                     |        |        |         |
| n-C <sub>13</sub>                   | 0.0000 |                                     |        |        |         |
| n-C <sub>14</sub>                   | 0.0000 |                                     |        |        |         |
| Steam/Water                         | 0.0008 |                                     |        |        |         |
| Nitrogen                            | 0.0110 |                                     |        |        |         |
| <b>Operation Condition</b>          |        | <b>Operation Condition</b>          |        |        |         |
| Temperature (°C)                    | 43.85  | Temperature (°C)                    | 43.85  | 44.1   | 0.57    |
| Pressure (Kg/cm <sup>2</sup> gauge) | 18.53  | Pressure (Kg/cm <sup>2</sup> gauge) | 18.53  | 18.53  | 0.00    |
| Molar Flow (kgmole/h)               | 5.19   | Molar Flow (kgmole/h)               | 5.19   | 47.3   | 89.03   |
| Mass Flow (kg/h)                    | 29.97  | Mass Flow (kg/h)                    | 29.97  | 250    | 88.01   |
| Molecular Weight                    | 5.7754 | Molecular Weight                    | 5.7754 | 5.29   | -9.18   |
| Total                               | 0.9882 | Total                               | 0.9881 | 0.9999 |         |

**Table A.5.5. BTX Stream Compositions**

| Variable         | Integration | 1233                    |        | Design | %Error |
|------------------|-------------|-------------------------|--------|--------|--------|
| Component (%mol) |             | Component (%mol)        |        |        |        |
| Hydrogen         | 0.0018      | Hydrogen                | 0.0018 | 0.0018 | 0.00   |
| Methane          | 0.0047      | Methane                 | 0.0047 | 0.0047 | 0.00   |
| 13-Butadiene     | 0.0010      | Butadienes/C4Acetylenes | 0.0010 | 0.0010 | 0.00   |
| 1-Butene         | 0.0156      | Butylenes               | 0.0156 | 0.0156 | 0.00   |
| n-Butane         | 0.0019      | Butanes                 | 0.0019 | 0.0019 | 0.00   |
| n-Pentane        | 0.1200      | C5-Hydrocarbons         | 0.2498 | 0.2498 | 0.00   |
| i-Pentane        | 0.0600      | C6 Non-Aromatics        | 0.0790 | 0.0790 | 0.00   |
| Cyclopentane     | 0.0698      | C7 Non-Aromatics        | 0.0323 | 0.0323 | 0.00   |
| 1-Hexyne         | 0.0790      | C8 Non-Aromatics        | 0.0126 | 0.0126 | 0.00   |

**Simulation Report – ECC 860 KTA**  
**Working Stage 6**

|                                     |                    |                                     |            |               |               |
|-------------------------------------|--------------------|-------------------------------------|------------|---------------|---------------|
| n-Hexane                            | 0.0000             | Benzene                             | 0.2871     | 0.2871        |               |
| 1-Heptyne                           | 0.0323             | Toluene                             | 0.1956     | 0.1956        | 0.00          |
| n-Heptane                           | 0.0000             | Xylenes/Ethylbenzene                | 0.0616     | 0.0616        |               |
| 1-Octyne                            | 0.0126             | Styrene                             | 0.0007     | 0.0007        | 0.00          |
| n-Octane                            | 0.0000             | C9-205°C                            | 0.0561     | 0.0561        |               |
| Benzene                             | 0.2871             | 205-288°C PGO                       | 0.0000     | 0.0000        | 0.00          |
| Toluene                             | 0.1956             | Steam/Water                         | 0.0002     | 0.0002        | 0.00          |
| p-Xylene                            | 0.0616             | Nitrogen                            | 0.0000     | 0.0000        | 0.00          |
| E-Benzene                           | 0.0000             |                                     |            |               |               |
| Styrene                             | 0.0007             |                                     |            |               |               |
| m-MStyrene                          | 0.0541             |                                     |            |               |               |
| n-Decane                            | 0.0020             |                                     |            |               |               |
| n-C <sub>11</sub>                   | 0.0000             |                                     |            |               |               |
| n-C <sub>12</sub>                   | 0.0000             |                                     |            |               |               |
| n-C <sub>13</sub>                   | 0.0000             |                                     |            |               |               |
| n-C <sub>14</sub>                   | 0.0000             |                                     |            |               |               |
| Steam/Water                         | 0.0002             |                                     |            |               |               |
| Nitrogen                            | 0.0000             |                                     |            |               |               |
| <b>Operation Condition</b>          |                    | <b>Operation Condition</b>          |            |               |               |
| Temperature (°C)                    | 45.20              | Temperature (°C)                    | 45.2000    | 45.2          | 0.00          |
| Pressure (Kg/cm <sup>2</sup> gauge) | 2.61               | Pressure (Kg/cm <sup>2</sup> gauge) | 2.6100     | 2.61          | 0.00          |
| Molar Flow (kgmole/h)               | 823.49             | Molar Flow (kgmole/h)               | 823.4945   | 822.1         | -0.17         |
| Mass Flow (kg/h)                    | 68950.00           | Mass Flow (kg/h)                    | 68950.0000 | 68950         | 0.00          |
| Molecular Weight                    | 83.7286            | Molecular Weight                    | 83.7286    | 83.87         | 0.17          |
| Total                               | 1.0000             | Total                               | 1.0000     | 1.0000        |               |
| <b>Variable</b>                     | <b>Integration</b> | <b>1246</b>                         |            | <b>Design</b> | <b>%Error</b> |
| <b>Component (%mol)</b>             |                    | <b>Component (%mol)</b>             |            |               |               |
| Hydrogen                            | 0.6603             | Hydrogen                            | 0.6603     | 0.6604        | 0.01          |
| Methane                             | 0.2328             | Methane                             | 0.2328     | 0.2328        | 0.01          |
| 13-Butadiene                        | 0.0005             | Butadienes/C4Acetylenes             | 0.0005     | 0.0005        | 0.01          |
| 1-Butene                            | 0.0125             | Butylenes                           | 0.0125     | 0.0125        | 0.01          |
| n-Butane                            | 0.0015             | Butanes                             | 0.0015     | 0.0015        | 0.01          |
| n-Pentane                           | 0.0606             | C5-Hydrocarbons                     | 0.0606     | 0.0606        | 0.01          |
| i-Pentane                           | 0.0000             | C6 Non-Aromatics                    | 0.0059     | 0.0059        |               |
| Cyclopentane                        | 0.0000             | C7 Non-Aromatics                    | 0.0009     | 0.0009        |               |
| 1-Hexyne                            | 0.0048             | C8 Non-Aromatics                    | 0.0001     | 0.0001        | 0.01          |
| n-Hexane                            | 0.0011             | Benzene                             | 0.0152     | 0.0152        | 0.01          |
| 1-Heptyne                           | 0.0009             | Toluene                             | 0.0034     | 0.0034        | 0.01          |
| n-Heptane                           | 0.0000             | Xylenes/Ethylbenzene                | 0.0004     | 0.0004        |               |
| 1-Octyne                            | 0.0001             | Styrene                             | 0.0000     | 0.0000        | #DIV/0!       |
| n-Octane                            | 0.0000             | C9-205°C                            | 0.0001     | 0.0001        |               |
| Benzene                             | 0.0152             | 205-288°C PGO                       | 0.0000     | 0.0000        | #DIV/0!       |

**Simulation Report – ECC 860 KTA**  
**Working Stage 6**

|                                     |                    |                                     |        |               |               |
|-------------------------------------|--------------------|-------------------------------------|--------|---------------|---------------|
| Toluene                             | 0.0034             | Steam/Water                         | 0.0006 | 0.0006        | 0.01          |
| p-Xylene                            | 0.0004             | Nitrogen                            | 0.0052 | 0.0052        | 0.01          |
| E-Benzene                           | 0.0000             |                                     |        |               |               |
| Styrene                             | 0.0000             |                                     |        |               |               |
| m-MStyrene                          | 0.0001             |                                     |        |               |               |
| n-Decane                            | 0.0000             |                                     |        |               |               |
| n-C <sub>11</sub>                   | 0.0000             |                                     |        |               |               |
| n-C <sub>12</sub>                   | 0.0000             |                                     |        |               |               |
| n-C <sub>13</sub>                   | 0.0000             |                                     |        |               |               |
| n-C <sub>14</sub>                   | 0.0000             |                                     |        |               |               |
| Steam/Water                         | 0.0006             |                                     |        |               |               |
| Nitrogen                            | 0.0052             |                                     |        |               |               |
| <b>Operation Condition</b>          |                    | <b>Operation Condition</b>          |        |               |               |
| Temperature (°C)                    | 44.30              | Temperature (°C)                    | 44.3   | 44.3000       | 0.00          |
| Pressure (Kg/cm <sup>2</sup> gauge) | 0.47               | Pressure (Kg/cm <sup>2</sup> gauge) | 0.47   | 0.4700        | 0.00          |
| Molar Flow (kgmole/h)               | 9.16               | Molar Flow (kgmole/h)               | 9.3    | 9.1627        | -1.50         |
| Mass Flow (kg/h)                    | 115.00             | Mass Flow (kg/h)                    | 115    | 115.0000      | 0.00          |
| Molecular Weight                    | 12.5508            | Molecular Weight                    | 12.43  | 12.5508       | 0.96          |
| Total                               | 0.9948             | Total                               | 1.0000 | 1.0001        |               |
| <b>Variable</b>                     | <b>Integration</b> | <b>1228</b>                         |        | <b>Design</b> | <b>%Error</b> |
| <b>Component (%mol)</b>             |                    | <b>Component (%mol)</b>             |        |               |               |
| Hydrogen                            | 0.0000             | Hydrogen                            | 0.0000 | 0.0000        |               |
| Methane                             | 0.0000             | Methane                             | 0.0000 | 0.0000        |               |
| 13-Butadiene                        | 0.0000             | Butadienes/C4Acetylenes             | 0.0000 | 0.0000        |               |
| 1-Butene                            | 0.0000             | Butylenes                           | 0.0000 | 0.0000        |               |
| n-Butane                            | 0.0000             | Butanes                             | 0.0000 | 0.0000        |               |
| n-Pentane                           | 0.0000             | C5-Hydrocarbons                     | 0.0000 | 0.0000        |               |
| i-Pentane                           | 0.0000             | C6 Non-Aromatics                    | 0.0000 | 0.0000        |               |
| Cyclopentane                        | 0.0000             | C7 Non-Aromatics                    | 0.0000 | 0.0000        |               |
| 1-Hexyne                            | 0.0000             | C8 Non-Aromatics                    | 0.0000 | 0.0258        |               |
| n-Hexane                            | 0.0000             | Benzene                             | 0.0000 | 0.0000        |               |
| 1-Heptyne                           | 0.0000             | Toluene                             | 0.0000 | 0.0000        |               |
| n-Heptane                           | 0.0000             | Xylenes/Ethylbenzene                | 0.0636 | 0.0132        |               |
| 1-Octyne                            | 0.0000             | Styrene                             | 0.0107 | 0.0010        |               |
| n-Octane                            | 0.0000             | C9-205°C                            | 0.9257 | 0.9600        |               |
| Benzene                             | 0.0000             | 205-288°C PGO                       | 0.0000 | 0.0001        |               |
| Toluene                             | 0.0000             | Steam/Water                         | 0.0000 | 0.0000        |               |
| p-Xylene                            | 0.0636             | Nitrogen                            | 0.0000 | 0.0000        | #DIV/0!       |
| E-Benzene                           | 0.0000             |                                     |        |               |               |
| Styrene                             | 0.0107             |                                     |        |               |               |
| m-MStyrene                          | 0.8927             |                                     |        |               |               |
| n-Decane                            | 0.0330             |                                     |        |               |               |

**Simulation Report – ECC 860 KTA**  
**Working Stage 6**

|                                     |                    |                                     |           |               |               |
|-------------------------------------|--------------------|-------------------------------------|-----------|---------------|---------------|
| n-C <sub>11</sub>                   | 0.0000             |                                     |           |               |               |
| n-C <sub>12</sub>                   | 0.0000             |                                     |           |               |               |
| n-C <sub>13</sub>                   | 0.0000             |                                     |           |               |               |
| n-C <sub>14</sub>                   | 0.0000             |                                     |           |               |               |
| Steam/Water                         | 0.0000             |                                     |           |               |               |
| Nitrogen                            | 0.0000             |                                     |           |               |               |
| <b>Operation Condition</b>          |                    | <b>Operation Condition</b>          |           |               |               |
| Temperature (°C)                    | 151.56             | Temperature (°C)                    | 151.5566  | 154.7         | 2.03          |
| Pressure (Kg/cm <sup>2</sup> gauge) | -0.36              | Pressure (Kg/cm <sup>2</sup> gauge) | -0.3600   | -0.36         | 0.00          |
| Molar Flow (kgmole/h)               | 49.91              | Molar Flow (kgmole/h)               | 49.9067   | 47.3          | -5.51         |
| Mass Flow (kg/h)                    | 5892.00            | Mass Flow (kg/h)                    | 5892.0001 | 5893          | 0.02          |
| Molecular Weight                    | 118.0603           | Molecular Weight                    | 118.0603  | 124.7         | 5.32          |
| Total                               | 1.0000             | Total                               | 1.0000    | 1.0001        |               |
| <b>Variable</b>                     | <b>Integration</b> | <b>1218</b>                         |           | <b>Design</b> | <b>%Error</b> |
| <b>Component (%mol)</b>             |                    | <b>Component (%mol)</b>             |           |               |               |
| Hydrogen                            | 0.1603             | Hydrogen                            | 0.1603    | 0.1474        | -8.75         |
| Methane                             | 0.3243             | Methane                             | 0.3243    | 0.3320        | 2.33          |
| 13-Butadiene                        | 0.0054             | Butadienes/C4Acetylenes             | 0.0054    | 0.0039        | -39.56        |
| 1-Butene                            | 0.0884             | Butylenes                           | 0.0884    | 0.0827        | -6.86         |
| n-Butane                            | 0.0091             | Butanes                             | 0.0091    | 0.0103        | 11.47         |
| n-Pentane                           | 0.1991             | C5-Hydrocarbons                     | 0.4016    | 0.4102        | 2.11          |
| i-Pentane                           | 0.1285             | C6 Non-Aromatics                    | 0.0009    | 0.0046        | 79.80         |
| Cyclopentane                        | 0.0740             | C7 Non-Aromatics                    | 0.0000    | 0.0000        | #DIV/0!       |
| 1-Hexyne                            | 0.0009             | C8 Non-Aromatics                    | 0.0000    | 0.0000        | #DIV/0!       |
| n-Hexane                            | 0.0000             | Benzene                             | 0.0003    | 0.0004        |               |
| 1-Heptyne                           | 0.0000             | Toluene                             | 0.0000    | 0.0000        |               |
| n-Heptane                           | 0.0000             | Xylenes/Ethylbenzene                | 0.0000    | 0.0000        |               |
| 1-Octyne                            | 0.0000             | Styrene                             | 0.0000    | 0.0000        |               |
| n-Octane                            | 0.0000             | C9-205°C                            | 0.0000    | 0.0000        |               |
| Benzene                             | 0.0003             | 205-288°C PGO                       | 0.0000    | 0.0000        | #DIV/0!       |
| Toluene                             | 0.0000             | Steam/Water                         | 0.0097    | 0.0061        |               |
| p-Xylene                            | 0.0000             | Nitrogen                            | 0.0000    | 0.0023        |               |
| E-Benzene                           | 0.0000             |                                     |           |               |               |
| Styrene                             | 0.0000             |                                     |           |               |               |
| m-MStyrene                          | 0.0000             |                                     |           |               |               |
| n-Decane                            | 0.0000             |                                     |           |               |               |
| n-C <sub>11</sub>                   | 0.0000             |                                     |           |               |               |
| n-C <sub>12</sub>                   | 0.0000             |                                     |           |               |               |
| n-C <sub>13</sub>                   | 0.0000             |                                     |           |               |               |
| n-C <sub>14</sub>                   | 0.0000             |                                     |           |               |               |
| Steam/Water                         | 0.0097             |                                     |           |               |               |

**Simulation Report – ECC 860 KTA**  
**Working Stage 6**

|                                     |                    |                                     |          |               |               |
|-------------------------------------|--------------------|-------------------------------------|----------|---------------|---------------|
| Nitrogen                            | 0.0000             |                                     |          |               |               |
| <b>Operation Condition</b>          |                    | <b>Operation Condition</b>          |          |               |               |
| Temperature (°C)                    | 42.99              | Temperature (°C)                    | 42.9936  | 43            | 0.01          |
| Pressure (Kg/cm <sup>2</sup> gauge) | 2.10               | Pressure (Kg/cm <sup>2</sup> gauge) | 2.1000   | 2.1           | 0.00          |
| Molar Flow (kgmole/h)               | 8.74               | Molar Flow (kgmole/h)               | 8.7364   | 8.7           | -0.42         |
| Mass Flow (kg/h)                    | 352.99             | Mass Flow (kg/h)                    | 352.9929 | 353           | 0.00          |
| Molecular Weight                    | 40.4049            | Molecular Weight                    | 40.4049  | 40.4          | -0.01         |
| Total                               | 1.0000             | Total                               | 1.0000   | 0.9999        |               |
| <b>Variable</b>                     | <b>Integration</b> | <b>1230</b>                         |          | <b>Design</b> | <b>%Error</b> |
| <b>Component (%mol)</b>             |                    | <b>Component (%mol)</b>             |          |               |               |
| Hydrogen                            | 0.4163             | Hydrogen                            | 0.4163   | 0.4117        | -1.11         |
| Methane                             | 0.2774             | Methane                             | 0.2774   | 0.2809        | 1.24          |
| 13-Butadiene                        | 0.0029             | Butadienes/C4Acetylenes             | 0.0029   | 0.0021        | -38.69        |
| 1-Butene                            | 0.0495             | Butylenes                           | 0.0495   | 0.0465        | -6.52         |
| n-Butane                            | 0.0052             | Butanes                             | 0.0052   | 0.0058        | 10.02         |
| n-Pentane                           | 0.1282             | C5-Hydrocarbons                     | 0.2270   | 0.2301        | 1.34          |
| i-Pentane                           | 0.0627             | C6 Non-Aromatics                    | 0.0035   | 0.0053        | 34.46         |
| Cyclopentane                        | 0.0361             | C7 Non-Aromatics                    | 0.0005   | 0.0005        | 7.87          |
| 1-Hexyne                            | 0.0029             | C8 Non-Aromatics                    | 0.0001   | 0.0001        | 48.81         |
| n-Hexane                            | 0.0006             | Benzene                             | 0.0079   | 0.0080        | 1.09          |
| 1-Heptyne                           | 0.0005             | Toluene                             | 0.0017   | 0.0017        | -2.37         |
| n-Heptane                           | 0.0000             | Xylenes/Ethylbenzene                | 0.0002   | 0.0002        |               |
| 1-Octyne                            | 0.0001             | Styrene                             | 0.0000   | 0.0000        | #DIV/0!       |
| n-Octane                            | 0.0000             | C9-205°C                            | 0.0001   | 0.0000        |               |
| Benzene                             | 0.0079             | 205-288°C PGO                       | 0.0000   | 0.0000        | #DIV/0!       |
| Toluene                             | 0.0017             | Steam/Water                         | 0.0051   | 0.0033        | -53.41        |
| p-Xylene                            | 0.0002             | Nitrogen                            | 0.0027   | 0.0038        | 29.96         |
| E-Benzene                           | 0.0000             |                                     |          |               |               |
| Styrene                             | 0.0000             |                                     |          |               |               |
| m-MStyrene                          | 0.0001             |                                     |          |               |               |
| n-Decane                            | 0.0000             |                                     |          |               |               |
| n-C <sub>11</sub>                   | 0.0000             |                                     |          |               |               |
| n-C <sub>12</sub>                   | 0.0000             |                                     |          |               |               |
| n-C <sub>13</sub>                   | 0.0000             |                                     |          |               |               |
| n-C <sub>14</sub>                   | 0.0000             |                                     |          |               |               |
| Steam/Water                         | 0.0051             |                                     |          |               |               |
| Nitrogen                            | 0.0027             |                                     |          |               |               |
| <b>Operation Condition</b>          |                    | <b>Operation Condition</b>          |          |               |               |
| Temperature (°C)                    | 42.08              | Temperature (°C)                    | 42.0818  | 42.1          | 0.04          |
| Pressure (Kg/cm <sup>2</sup> gauge) | 0.47               | Pressure (Kg/cm <sup>2</sup> gauge) | 0.4700   | 0.47          | 0.00          |
| Molar Flow (kgmole/h)               | 17.90              | Molar Flow (kgmole/h)               | 17.8991  | 18            | 0.56          |

**Simulation Report – ECC 860 KTA**  
**Working Stage 6**

|                                     |                    |                                     |            |               |               |
|-------------------------------------|--------------------|-------------------------------------|------------|---------------|---------------|
| Mass Flow (kg/h)                    | 467.99             | Mass Flow (kg/h)                    | 467.9929   | 468           | 0.00          |
| Molecular Weight                    | 26.1461            | Molecular Weight                    | 26.1461    | 25.99         | -0.60         |
| Total                               | 0.9973             | Total                               | 1.0000     | 1.0000        |               |
| <b>Variable</b>                     | <b>Integration</b> | <b>1227</b>                         |            | <b>Design</b> | <b>%Error</b> |
| <b>Component (%mol)</b>             |                    | <b>Component (%mol)</b>             |            |               |               |
| Hydrogen                            | 0.0000             | Hydrogen                            | 0.0000     | 0.0000        |               |
| Methane                             | 0.0000             | Methane                             | 0.0000     | 0.0000        |               |
| 13-Butadiene                        | 0.0000             | Butadienes/C4Acetylenes             | 0.0000     | 0.0000        |               |
| 1-Butene                            | 0.0000             | Butylenes                           | 0.0000     | 0.0000        |               |
| n-Butane                            | 0.0000             | Butanes                             | 0.0000     | 0.0000        |               |
| n-Pentane                           | 0.0000             | C5-Hydrocarbons                     | 0.0125     | 0.0125        |               |
| i-Pentane                           | 0.0000             | C6 Non-Aromatics                    | 0.1153     | 0.1079        |               |
| Cyclopentane                        | 0.0125             | C7 Non-Aromatics                    | 0.0482     | 0.0483        | 0.29          |
| 1-Hexyne                            | 0.1153             | C8 Non-Aromatics                    | 0.0188     | 0.0167        | -12.50        |
| n-Hexane                            | 0.0000             | Benzene                             | 0.4274     | 0.4285        |               |
| 1-Heptyne                           | 0.0482             | Toluene                             | 0.2917     | 0.2927        | 0.36          |
| n-Heptane                           | 0.0000             | Xylenes/Ethylbenzene                | 0.0861     | 0.0910        |               |
| 1-Octyne                            | 0.0188             | Styrene                             | 0.0001     | 0.0010        | 92.06         |
| n-Octane                            | 0.0000             | C9-205°C                            | 0.0000     | 0.0014        |               |
| Benzene                             | 0.4274             | 205-288°C PGO                       | 0.0000     | 0.0000        | #DIV/0!       |
| Toluene                             | 0.2917             | Steam/Water                         | 0.0000     | 0.0000        | #DIV/0!       |
| p-Xylene                            | 0.0861             | Nitrogen                            | 0.0000     | 0.0000        | #DIV/0!       |
| E-Benzene                           | 0.0000             |                                     |            |               |               |
| Styrene                             | 0.0001             |                                     |            |               |               |
| m-MStyrene                          | 0.0000             |                                     |            |               |               |
| n-Decane                            | 0.0000             |                                     |            |               |               |
| n-C <sub>11</sub>                   | 0.0000             |                                     |            |               |               |
| n-C <sub>12</sub>                   | 0.0000             |                                     |            |               |               |
| n-C <sub>13</sub>                   | 0.0000             |                                     |            |               |               |
| n-C <sub>14</sub>                   | 0.0000             |                                     |            |               |               |
| Steam/Water                         | 0.0000             |                                     |            |               |               |
| Nitrogen                            | 0.0000             |                                     |            |               |               |
| <b>Operation Condition</b>          |                    | <b>Operation Condition</b>          |            |               |               |
| Temperature (°C)                    | 46.21              | Temperature (°C)                    | 46.2099    | 43.5          | -6.23         |
| Pressure (Kg/cm <sup>2</sup> gauge) | 3.00               | Pressure (Kg/cm <sup>2</sup> gauge) | 3.0000     | 3             | 0.00          |
| Molar Flow (kgmole/h)               | 552.29             | Molar Flow (kgmole/h)               | 552.2890   | 549.5         | -0.51         |
| Mass Flow (kg/h)                    | 47749.96           | Mass Flow (kg/h)                    | 47749.9588 | 47749         | 0.00          |
| Molecular Weight                    | 86.4583            | Molecular Weight                    | 86.4583    | 86.89         | 0.50          |
| Total                               | 1.0000             | Total                               | 1.0000     | 1.0000        |               |
| <b>Variable</b>                     | <b>Integration</b> | <b>1220</b>                         |            | <b>Design</b> | <b>%Error</b> |
| <b>Component (%mol)</b>             |                    | <b>Component (%mol)</b>             |            |               |               |
| Hydrogen                            | 0.0000             | Hydrogen                            | 0.0000     | 0.0000        |               |



**Simulation Report – ECC 860 KTA**  
**Working Stage 6**

|                                     |                    |                                     |            |               |               |
|-------------------------------------|--------------------|-------------------------------------|------------|---------------|---------------|
| Methane                             | 0.0000             | Methane                             | 0.0000     | 0.0000        |               |
| 13-Butadiene                        | 0.0000             | Butadienes/C4Acetylenes             | 0.0000     | 0.0000        |               |
| 1-Butene                            | 0.0000             | Butylenes                           | 0.0000     | 0.0000        |               |
| n-Butane                            | 0.0000             | Butanes                             | 0.0000     | 0.0000        |               |
| n-Pentane                           | 0.0000             | C5-Hydrocarbons                     | 0.0115     | 0.0115        |               |
| i-Pentane                           | 0.0000             | C6 Non-Aromatics                    | 0.0993     | 0.0993        |               |
| Cyclopentane                        | 0.0115             | C7 Non-Aromatics                    | 0.0445     | 0.0445        | 0.00          |
| 1-Hexyne                            | 0.1058             | C8 Non-Aromatics                    | 0.0174     | 0.0174        | 0.00          |
| n-Hexane                            | 0.0000             | Benzene                             | 0.3946     | 0.3946        |               |
| 1-Heptyne                           | 0.0442             | Toluene                             | 0.2695     | 0.2695        | 0.00          |
| n-Heptane                           | 0.0000             | Xylenes/Ethylbenzene                | 0.0849     | 0.0849        |               |
| 1-Octyne                            | 0.0172             | Styrene                             | 0.0010     | 0.0010        | 0.00          |
| n-Octane                            | 0.0000             | C9-205°C                            | 0.0773     | 0.0773        |               |
| Benzene                             | 0.3919             | 205-288°C PGO                       | 0.0000     | 0.0000        | #DIV/0!       |
| Toluene                             | 0.2675             | Steam/Water                         | 0.0000     | 0.0000        | #DIV/0!       |
| p-Xylene                            | 0.0842             | Nitrogen                            | 0.0000     | 0.0000        | #DIV/0!       |
| E-Benzene                           | 0.0000             |                                     |            |               |               |
| Styrene                             | 0.0010             |                                     |            |               |               |
| m-MStyrene                          | 0.0740             |                                     |            |               |               |
| n-Decane                            | 0.0027             |                                     |            |               |               |
| n-C <sub>11</sub>                   | 0.0000             |                                     |            |               |               |
| n-C <sub>12</sub>                   | 0.0000             |                                     |            |               |               |
| n-C <sub>13</sub>                   | 0.0000             |                                     |            |               |               |
| n-C <sub>14</sub>                   | 0.0000             |                                     |            |               |               |
| Steam/Water                         | 0.0000             |                                     |            |               |               |
| Nitrogen                            | 0.0000             |                                     |            |               |               |
| <b>Operation Condition</b>          |                    | <b>Operation Condition</b>          |            |               |               |
| Temperature (°C)                    | 144.60             | Temperature (°C)                    | 144.6017   | 143.3         | -0.91         |
| Pressure (Kg/cm <sup>2</sup> gauge) | 2.81               | Pressure (Kg/cm <sup>2</sup> gauge) | 2.8100     | 2.81          | 0.00          |
| Molar Flow (kgmole/h)               | 602.20             | Molar Flow (kgmole/h)               | 602.1957   | 596.8         | -0.90         |
| Mass Flow (kg/h)                    | 53641.96           | Mass Flow (kg/h)                    | 53641.9591 | 53642         | 0.00          |
| Molecular Weight                    | 89.0773            | Molecular Weight                    | 89.0773    | 89.89         | 0.90          |
| Total                               | 1.0000             | Total                               | 1.0000     | 1.0000        |               |
| <b>Variable</b>                     | <b>Integration</b> | <b>1221</b>                         |            | <b>Design</b> | <b>%Error</b> |
| <b>Component (%mol)</b>             |                    | <b>Component (%mol)</b>             |            |               |               |
| Hydrogen                            | 0.0000             | Hydrogen                            | 0.0000     | 0.0000        |               |
| Methane                             | 0.0000             | Methane                             | 0.0000     | 0.0000        |               |
| 13-Butadiene                        | 0.0000             | Butadienes/C4Acetylenes             | 0.0000     | 0.0000        |               |
| 1-Butene                            | 0.0000             | Butylenes                           | 0.0000     | 0.0000        |               |
| n-Butane                            | 0.0000             | Butanes                             | 0.0000     | 0.0000        |               |
| n-Pentane                           | 0.0000             | C5-Hydrocarbons                     | 0.0115     | 0.0115        |               |
| i-Pentane                           | 0.0000             | C6 Non-Aromatics                    | 0.1058     | 0.0993        |               |

**Simulation Report – ECC 860 KTA**  
**Working Stage 6**

|                                     |                    |                                     |            |               |               |
|-------------------------------------|--------------------|-------------------------------------|------------|---------------|---------------|
| Cyclopentane                        | 0.0115             | C7 Non-Aromatics                    | 0.0442     | 0.0445        | 0.74          |
| 1-Hexyne                            | 0.1058             | C8 Non-Aromatics                    | 0.0172     | 0.0174        | 0.98          |
| n-Hexane                            | 0.0000             | Benzene                             | 0.3919     | 0.3946        |               |
| 1-Heptyne                           | 0.0442             | Toluene                             | 0.2675     | 0.2695        | 0.75          |
| n-Heptane                           | 0.0000             | Xylenes/Ethylbenzene                | 0.0842     | 0.0849        |               |
| 1-Octyne                            | 0.0172             | Styrene                             | 0.0010     | 0.0010        | 4.28          |
| n-Octane                            | 0.0000             | C9-205°C                            | 0.0767     | 0.0773        |               |
| Benzene                             | 0.3919             | 205-288°C PGO                       | 0.0000     | 0.0000        | #DIV/0!       |
| Toluene                             | 0.2675             | Steam/Water                         | 0.0000     | 0.0000        | #DIV/0!       |
| p-Xylene                            | 0.0842             | Nitrogen                            | 0.0000     | 0.0000        | #DIV/0!       |
| E-Benzene                           | 0.0000             |                                     |            |               |               |
| Styrene                             | 0.0010             |                                     |            |               |               |
| m-MStyrene                          | 0.0740             |                                     |            |               |               |
| n-Decane                            | 0.0027             |                                     |            |               |               |
| n-C <sub>11</sub>                   | 0.0000             |                                     |            |               |               |
| n-C <sub>12</sub>                   | 0.0000             |                                     |            |               |               |
| n-C <sub>13</sub>                   | 0.0000             |                                     |            |               |               |
| n-C <sub>14</sub>                   | 0.0000             |                                     |            |               |               |
| Steam/Water                         | 0.0000             |                                     |            |               |               |
| Nitrogen                            | 0.0000             |                                     |            |               |               |
| <b>Operation Condition</b>          |                    | <b>Operation Condition</b>          |            |               |               |
| Temperature (°C)                    | 73.70              | Temperature (°C)                    | 73.6978    | 74.2          | 0.68          |
| Pressure (Kg/cm <sup>2</sup> gauge) | -0.53              | Pressure (Kg/cm <sup>2</sup> gauge) | -0.5300    | -0.53         | 0.00          |
| Molar Flow (kgmole/h)               | 602.20             | Molar Flow (kgmole/h)               | 602.1957   | 596.8         | -0.90         |
| Mass Flow (kg/h)                    | 53641.96           | Mass Flow (kg/h)                    | 53641.9591 | 53642         | 0.00          |
| Molecular Weight                    | 89.0773            | Molecular Weight                    | 89.0773    | 89.89         | 0.90          |
| Total                               | 1.0000             | Total                               | 1.0000     | 1.0000        |               |
| <b>Variable</b>                     | <b>Integration</b> | <b>1241</b>                         |            | <b>Design</b> | <b>%Error</b> |
| <b>Component (%mol)</b>             |                    | <b>Component (%mol)</b>             |            |               |               |
| Hydrogen                            | 0.0004             | Hydrogen                            | 0.0004     | 0.0008        | 50.01         |
| Methane                             | 0.0049             | Methane                             | 0.0049     | 0.0044        | -11.34        |
| 13-Butadiene                        | 0.0037             | Butadienes/C4Acetylenes             | 0.0037     | 0.0036        | -2.76         |
| 1-Butene                            | 0.0568             | Butylenes                           | 0.0568     | 0.0557        | -1.95         |
| n-Butane                            | 0.0070             | Butanes                             | 0.0070     | 0.0067        | -4.46         |
| n-Pentane                           | 0.4566             | C5-Hydrocarbons                     | 0.9185     | 0.8997        | -2.09         |
| i-Pentane                           | 0.2272             | C6 Non-Aromatics                    | 0.0064     | 0.0259        | 75.29         |
| Cyclopentane                        | 0.2348             | C7 Non-Aromatics                    | 0.0000     | 0.0000        | #DIV/0!       |
| 1-Hexyne                            | 0.0064             | C8 Non-Aromatics                    | 0.0000     | 0.0000        | #DIV/0!       |
| n-Hexane                            | 0.0000             | Benzene                             | 0.0019     | 0.0027        |               |
| 1-Heptyne                           | 0.0000             | Toluene                             | 0.0000     | 0.0000        |               |
| n-Heptane                           | 0.0000             | Xylenes/Ethylbenzene                | 0.0000     | 0.0000        |               |
| 1-Octyne                            | 0.0000             | Styrene                             | 0.0000     | 0.0000        |               |

**Simulation Report – ECC 860 KTA**  
**Working Stage 6**

---

|                                     |          |                                     |            |        |         |
|-------------------------------------|----------|-------------------------------------|------------|--------|---------|
| n-Octane                            | 0.0000   | C9-205°C                            | 0.0000     | 0.0000 |         |
| Benzene                             | 0.0019   | 205-288°C PGO                       | 0.0000     | 0.0000 | #DIV/0! |
| Toluene                             | 0.0000   | Steam/Water                         | 0.0004     | 0.0005 |         |
| p-Xylene                            | 0.0000   | Nitrogen                            | 0.0000     | 0.0000 |         |
| E-Benzene                           | 0.0000   |                                     |            |        |         |
| Styrene                             | 0.0000   |                                     |            |        |         |
| m-MStyrene                          | 0.0000   |                                     |            |        |         |
| n-Decane                            | 0.0000   |                                     |            |        |         |
| n-C <sub>11</sub>                   | 0.0000   |                                     |            |        |         |
| n-C <sub>12</sub>                   | 0.0000   |                                     |            |        |         |
| n-C <sub>13</sub>                   | 0.0000   |                                     |            |        |         |
| n-C <sub>14</sub>                   | 0.0000   |                                     |            |        |         |
| Steam/Water                         | 0.0004   |                                     |            |        |         |
| Nitrogen                            | 0.0000   |                                     |            |        |         |
| <b>Operation Condition</b>          |          | <b>Operation Condition</b>          |            |        |         |
| Temperature (°C)                    | 43.26    | Temperature (°C)                    | 43.2600    | 43     | -0.60   |
| Pressure (Kg/cm <sup>2</sup> gauge) | 5.50     | Pressure (Kg/cm <sup>2</sup> gauge) | 5.5000     | 5.5    | 0.00    |
| Molar Flow (kgmole/h)               | 212.60   | Molar Flow (kgmole/h)               | 212.6000   | 216.6  | 1.85    |
| Mass Flow (kg/h)                    | 14956.92 | Mass Flow (kg/h)                    | 14956.9233 | 14956  | -0.01   |
| Molecular Weight                    | 70.3524  | Molecular Weight                    | 70.3524    | 69.04  | -1.90   |
| Total                               | 1.0000   | Total                               | 1.0000     | 1.0000 |         |

## B. PFD Simulation

### B.1. Integration Stage 1 to Stage 5

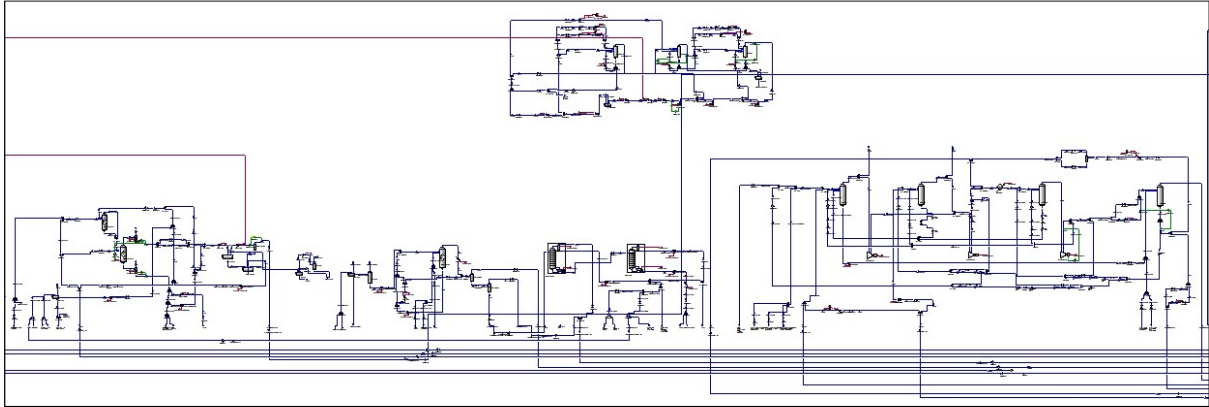

Figure B.1.1. Stage 1 Integration on the Integration of Stage 1-Stage 5

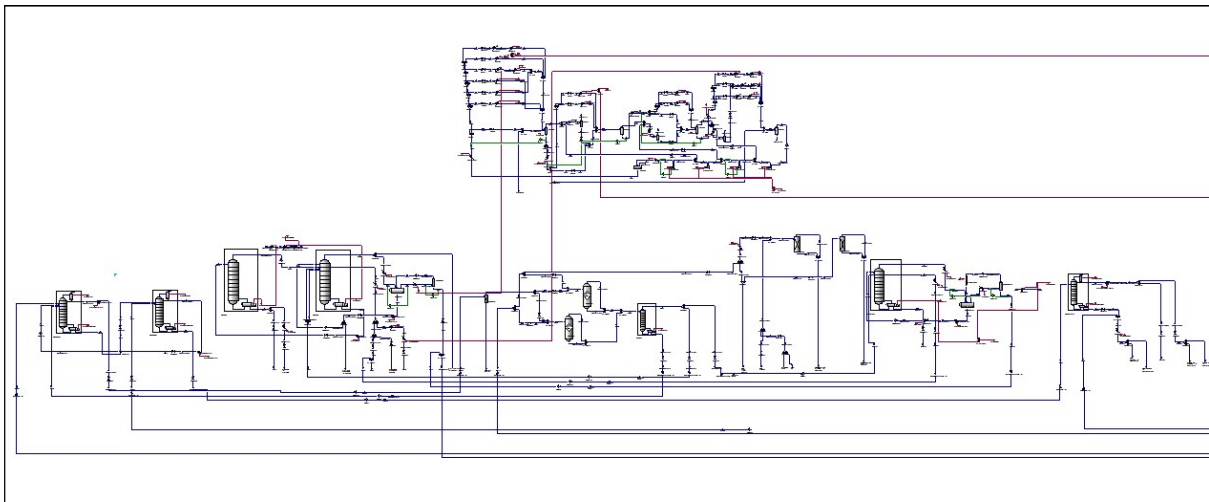

Figure B.1.2. Stage 2 Integration on the Integration of Stage 1-Stage 5

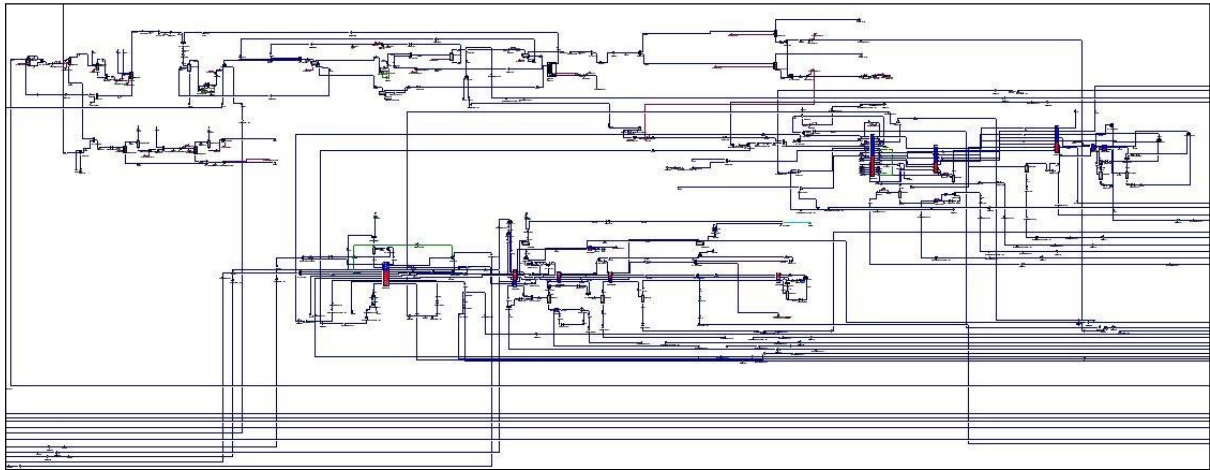

**Figure B.1.3. Stage 3 Integration on the Integration of Stage 1-Stage 5**

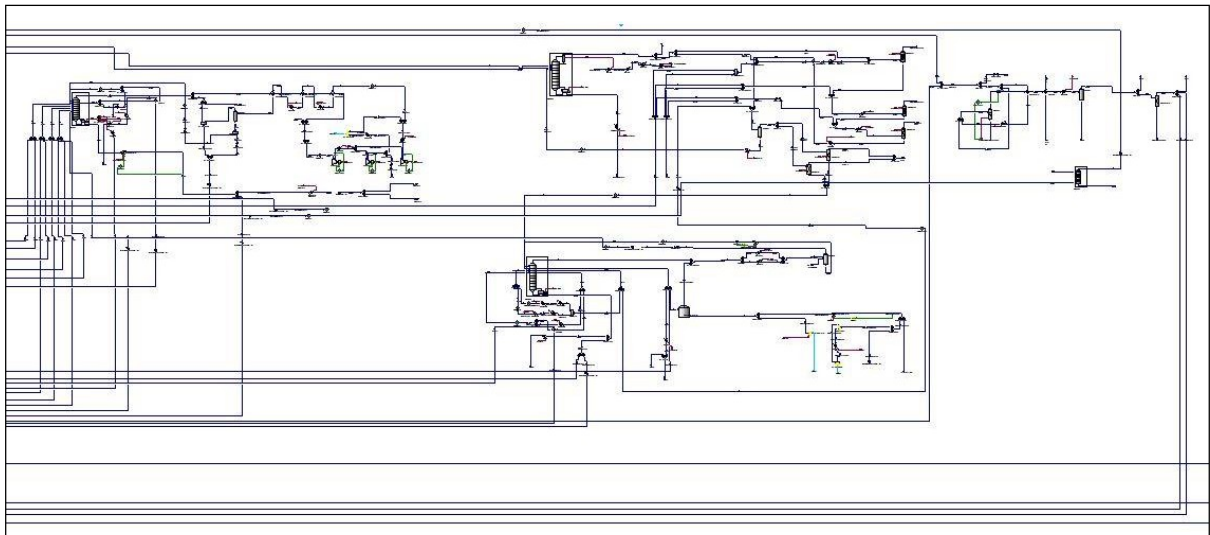

**Figure B.1.4. Stage 4 Integration on the Integration of Stage 1-Stage 5**

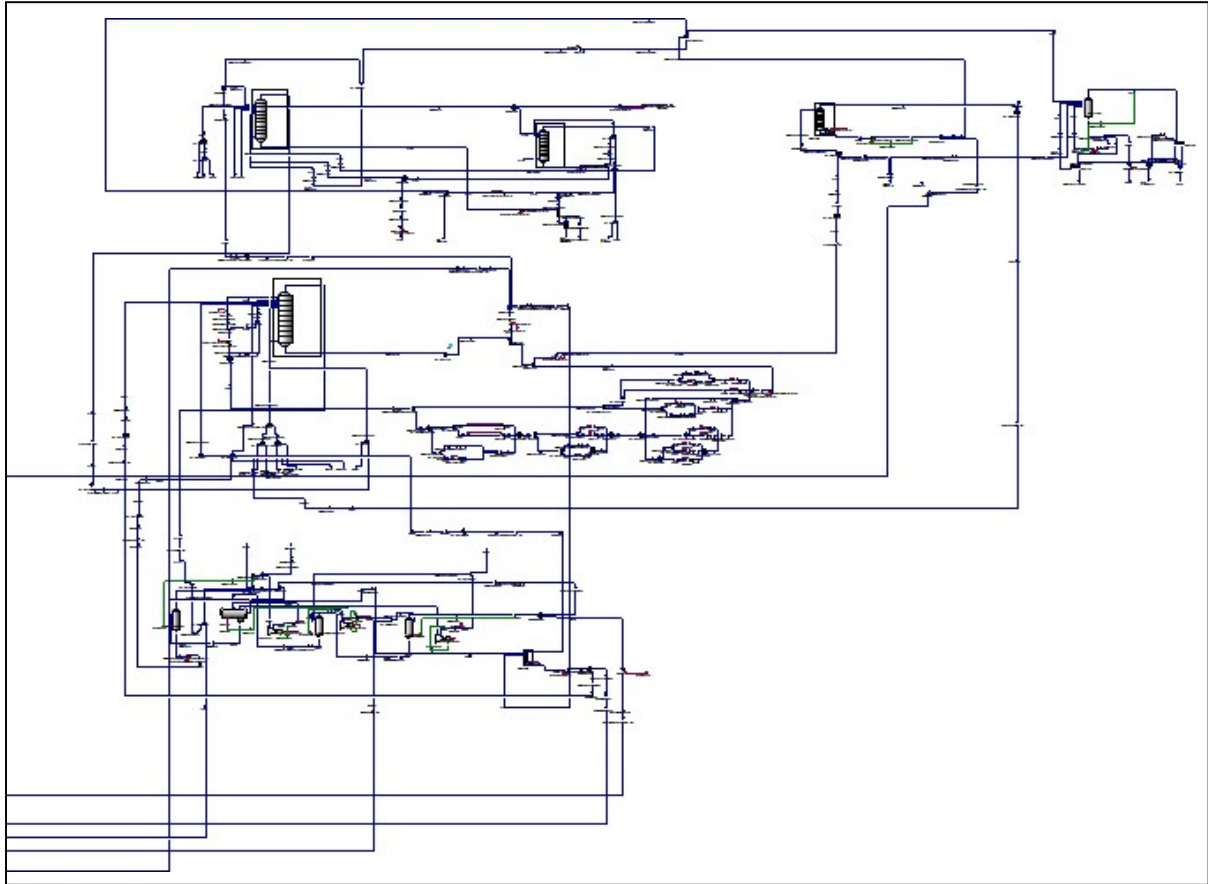

**Figure B.1.5. Stage 5 Integration on the Integration of Stage 1-Stage 5**
